# Supplementary material
Source: PubMed Central journal article supplement (PMC3620697)
Supplement: NIHMS432523-supplement-3.pdf [file NIHMS432523-supplement-3.pdf]

Panel 1: Genes significantly regulated in both chronic (CP) and aggressive (AP) periodontitis (p<0.05).

| FC AP       | p AP    | FC CP        | p CP    | Symbol     | Name                                                                                          |
|-------------|---------|--------------|---------|------------|-----------------------------------------------------------------------------------------------|
| 1,25353302  | 0,02805 | 1,194991205  | 0,0018  | A1BG       | alpha-1-B glycoprotein                                                                        |
| 1,559409685 | 0,00245 | 1,642621402  | 0,00013 | A2M        | alpha-2-macroglobulin                                                                         |
| 0,385552706 | 0,00014 | 0,612168196  | 0,00512 | A2ML1      | alpha-2-macroglobulin-like 1                                                                  |
| 0,351842094 | 0,00315 | 0,5498808075 | 0,00029 | A2ML1      | alpha-2-macroglobulin-like 1                                                                  |
| 1,322254605 | 0,04029 | 1,329607108  | 0,00387 | A4GALT     | alpha 1,4-galactosyltransferase                                                               |
| 0,755759964 | 0,035   | 0,793333843  | 0,00062 | AACS       | acetoacetyl-CoA synthetase                                                                    |
| 0,282045534 | 0,00065 | 0,65747138   | 0,01538 | AADAC      | arylacetylamine deacetylase (esterase)                                                        |
| 0,163572259 | 0,00111 | 0,32376075   | 0,00032 | AADACL2    | arylacetylamine deacetylase-like 2                                                            |
| 0,806641759 | 0,02272 | 0,862741345  | 0,01668 | AADAT      | aminoacidate aminotransferase                                                                 |
| 0,285190929 | 0,00031 | 0,434070114  | 0,00009 | ABCA12     | ATP-binding cassette, sub-family A (ABC1), member 12                                          |
| 1,346300069 | 0,00368 | 1,160703914  | 0,04231 | ABCA9      | ATP-binding cassette, sub-family A (ABC1), member 9                                           |
| 0,767905135 | 0,04193 | 0,85797053   | 0,02988 | ABCB7      | ATP-binding cassette, sub-family B (MDR/TAP), member 7                                        |
| 1,30224419  | 0,02198 | 1,215036792  | 0,00631 | ABCC3      | ATP-binding cassette, sub-family C (CFTR/MRP), member 3                                       |
| 1,181811547 | 0,02066 | 1,092020546  | 0,0217  | ABCD2      | ATP-binding cassette, sub-family D (ALD), member 2                                            |
| 0,597909898 | 0,01502 | 0,680185426  | 0,02469 | ABCD3      | ATP-binding cassette, sub-family D (ALD), member 3                                            |
| 0,690637224 | 0,01987 | 0,77916458   | 0,0016  | ABCE1      | ATP-binding cassette, sub-family E (OABP), member 1                                           |
| 1,325007017 | 0,01181 | 1,181811547  | 0,02497 | ABHD10     | abhydrolase domain containing 10                                                              |
| 1,456999114 | 0,03272 | 1,36983298   | 0,00065 | ABHD14A    | abhydrolase domain containing 14A                                                             |
| 0,43708931  | 0,00172 | 0,525222272  | 0,00201 | ABHD5      | abhydrolase domain containing 5                                                               |
| 0,475659138 | 0,01245 | 0,587638164  | 0       | ABHD5      | abhydrolase domain containing 5                                                               |
| 0,456599125 | 0,00023 | 0,646624466  | 0,00063 | ABHD5      | abhydrolase domain containing 5                                                               |
| 0,729510172 | 0,01826 | 0,87175824   | 0,04672 | ABHD5      | abhydrolase domain containing 5                                                               |
| 0,673150035 | 0,00741 | 0,706616822  | 0,01384 | ABI1       | abl-interactor 1                                                                              |
| 1,385109468 | 0,00098 | 1,344434994  | 0,00007 | ABI2       | abl-interactor 2                                                                              |
| 1,25092908  | 0,01881 | 1,272794935  | 0,00023 | ABI3       | ABI family, member 3                                                                          |
| 0,327825504 | 0,00215 | 0,669427628  | 0,00017 | ABLIM1     | actin binding LIM protein 1                                                                   |
| 0,561360711 | 0,02433 | 0,683493726  | 0,00411 | ABLIM1     | actin binding LIM protein 1                                                                   |
| 0,593779833 | 0,00733 | 0,811689581  | 0,01573 | ABR        | active BCR-related gene                                                                       |
| 0,598324482 | 0,00243 | 0,789493887  | 0,00046 | ACACA      | acetyl-CoA carboxylase alpha                                                                  |
| 1,189207115 | 0,02427 | 1,244011653  | 0,00053 | ACAN       | aggregan                                                                                      |
| 1,743516479 | 0,00902 | 1,714752073  | 0,00012 | ACAP1      | ArfGAP with coiled-coil, ankyrin repeat and PH domains 1                                      |
| 0,539240216 | 0,00564 | 0,640823962  | 0,00001 | ACAT2      | acetyl-CoA acetyltransferase 2                                                                |
| 1,502119927 | 0,00044 | 1,414213562  | 0,00007 | ACBD4      | acyl-CoA binding domain containing 4                                                          |
| 1,300440147 | 0,03952 | 1,257884972  | 0,00422 | ACE        | angiotensin I converting enzyme (peptidyl-dipeptidase A) 1                                    |
| 0,50697974  | 0,00007 | 0,782411782  | 0,02699 | ACER1      | alkaline ceramidase 1                                                                         |
| 1,458009379 | 0,0042  | 1,264879542  | 0,00003 | ACOXL      | acyl-CoA oxidase-like                                                                         |
| 0,490049708 | 0,00924 | 0,538120062  | 0,00014 | ACPP       | acid phosphatase, prostate                                                                    |
| 0,76684133  | 0,01946 | 0,803293997  | 0,00588 | ACPP       | acid phosphatase, prostate                                                                    |
| 1,439931319 | 0,00468 | 1,105730653  | 0,03755 | ACRV1      | acrosomal vesicle protein 1                                                                   |
| 1,203303026 | 0,02809 | 1,212512819  | 0,00032 | ACRV1      | acrosomal vesicle protein 1                                                                   |
| 0,649769531 | 0,03133 | 0,829894586  | 0,03141 | ACSBG1     | acyl-CoA synthetase bubblegum family member 1                                                 |
| 1,437936533 | 0,02262 | 1,255271991  | 0,01284 | ACSL5      | acyl-CoA synthetase long-chain family member 5                                                |
| 1,464085696 | 0,001   | 1,381274448  | 0,00075 | ACSL5      | acyl-CoA synthetase long-chain family member 5                                                |
| 1,194163187 | 0,0272  | 1,125838586  | 0,02476 | ACSM1      | acyl-CoA synthetase medium-chain family member 1                                              |
| 1,187559666 | 0,03784 | 1,144724161  | 0,00504 | ACSM5      | acyl-CoA synthetase medium-chain family member 5                                              |
| 1,388955136 | 0,01821 | 1,164733586  | 0,03895 | ACSS1      | acyl-CoA synthetase short-chain family member 1                                               |
| 1,803750757 | 0,00461 | 1,666706414  | 0,00043 | ACTA2      | actin, alpha 2, smooth muscle, aorta                                                          |
| 1,492778383 | 0,01653 | 1,584469622  | 0,01001 | ACTA2      | actin, alpha 2, smooth muscle, aorta                                                          |
| 1,20163605  | 0,02776 | 1,174461971  | 0,00704 | ACTN2      | actinin, alpha 2                                                                              |
| 0,632001549 | 0,00682 | 0,76154437   | 0,00012 | ACTR10     | actin-related protein 10 homolog (S. cerevisiae)                                              |
| 0,710053679 | 0,02475 | 0,806641759  | 0,00733 | ACTR3      | ARP3 actin-related protein 3 homolog (yeast)                                                  |
| 0,677832163 | 0,00037 | 0,759435845  | 0,00232 | ACVR1B     | activin A receptor, type IB                                                                   |
| 1,488642555 | 0,00811 | 1,498999602  | 0,00155 | ACVRL1     | activin A receptor type II-like 1                                                             |
| 1,22858698  | 0,03565 | 1,161508732  | 0,01704 | ACY3       | aspartoacylase (aminocyclase) 3                                                               |
| 0,718968266 | 0,04497 | 0,791685866  | 0,00162 | ACYP2      | acylphosphatase 2, muscle type                                                                |
| 1,957483301 | 0,00005 | 1,461044379  | 0,00107 | ADA        | adenosine deaminase                                                                           |
| 1,72428709  | 0,00135 | 1,408344227  | 0,0014  | ADA        | adenosine deaminase                                                                           |
| 1,723092319 | 0,02323 | 1,511519928  | 0,04331 | ADAM12     | ADAM metalloproteinase domain 12                                                              |
| 0,78024548  | 0,02458 | 0,880869374  | 0,02103 | ADAM17     | ADAM metalloproteinase domain 17                                                              |
| 1,841651394 | 0,00076 | 1,22010051   | 0,02372 | ADAM19     | ADAM metalloproteinase domain 19                                                              |
| 2,545589871 | 0,00313 | 2,386671486  | 0,00022 | ADAM28     | ADAM metalloproteinase domain 28                                                              |
| 2,002774511 | 0,00425 | 2,283109414  | 0,00063 | ADAM28     | ADAM metalloproteinase domain 28                                                              |
| 1,437936533 | 0,0128  | 1,684125907  | 0,00018 | ADAM28     | ADAM metalloproteinase domain 28                                                              |
| 1,620006947 | 0,02313 | 1,534746096  | 0,03222 | ADAMDEC1   | ADAM-like, decysin 1                                                                          |
| 1,477338064 | 0,01285 | 1,43296165   | 0,01775 | ADAMTS1    | ADAM metalloproteinase with thrombospondin type 1 motif, 1                                    |
| 1,263127262 | 0,02605 | 1,286097483  | 0,00219 | ADAMTS12   | ADAM metalloproteinase with thrombospondin type 1 motif, 12                                   |
| 1,299539062 | 0,02002 | 1,181811547  | 0,00265 | ADAMTS9    | ADAM metalloproteinase with thrombospondin type 1 motif, 9                                    |
| 0,685866644 | 0,00624 | 0,734075318  | 0,00037 | ADAP2      | ArfGAP with dual PH domains 2                                                                 |
| 0,737134609 | 0,03074 | 0,774319028  | 0,0059  | ADAT2      | adenosine deaminase, tRNA-specific 2                                                          |
| 0,463294031 | 0,00566 | 0,529609167  | 0,0052  | ADH7       | alcohol dehydrogenase 7 (class IV), mu or sigma polypeptide                                   |
| 0,608361179 | 0,00037 | 0,783497187  | 0,00706 | ADIPOR2    | adiponectin receptor 2                                                                        |
| 0,581157054 | 0,00106 | 0,838568184  | 0,01679 | ADK        | adenosine kinase                                                                              |
| 0,595015848 | 0,00082 | 0,708087719  | 0,00314 | ADORA2B    | adenosine A2b receptor                                                                        |
| 1,25353302  | 0,03181 | 1,155886707  | 0,03088 | ADPRH      | ADP-ribosylarginine hydrolase                                                                 |
| 1,520978753 | 0,00748 | 1,314031627  | 0,00026 | ADPRH      | ADP-ribosylarginine hydrolase                                                                 |
| 1,172834949 | 0,03495 | 1,159899655  | 0,01278 | ADPRHL1    | ADP-ribosylhydrolase like 1                                                                   |
| 0,516199268 | 0,00051 | 0,708087719  | 0,00039 | ADSSL1     | adenylosuccinate synthase like 1                                                              |
| 1,29145735  | 0,04013 | 1,267512522  | 0,00209 | AFAP1L1    | actin filament associated protein 1-like 1                                                    |
| 1,240567298 | 0,01823 | 1,183451022  | 0,01563 | AFF2       | AF4/FMR2 family, member 2                                                                     |
| 0,577542892 | 0,02937 | 0,708087719  | 0,00007 | AFG3L1P    | AFG3 ATPase family gene 3-like 1 (S. cerevisiae), pseudogene                                  |
| 0,625898229 | 0,03999 | 0,593779833  | 0,00001 | AFG3L2     | AFG3 ATPase family gene 3-like 2 (S. cerevisiae)                                              |
| 1,244011653 | 0,03667 | 1,194991205  | 0,00261 | AFGF2      | ArfGAP with FG repeats 2                                                                      |
| 0,582366793 | 0,04722 | 0,688247801  | 0,00079 | AGPAT4     | 1-acylglycerol-3-phosphate O-acyltransferase 4 (lysophosphatidic acid acyltransferase, delta) |
| 0,784040454 | 0,0377  | 0,822450069  | 0,00139 | AGPAT4-IT1 | AGPAT4 intronic transcript 1 (non-protein coding)                                             |
| 1,293248932 | 0,02236 | 1,258757174  | 0,00016 | AGXT2L2    | alanine-glyoxylate aminotransferase 2-like 2                                                  |
| 1,372684431 | 0,00144 | 1,2397077    | 0,00083 | AGXT2L2    | alanine-glyoxylate aminotransferase 2-like 2                                                  |
| 0,610896551 | 0,01981 | 0,716977624  | 0,00005 | AHCTF1     | AT hook containing transcription factor 1                                                     |
| 0,478635729 | 0,00008 | 0,523405141  | 0,00002 | AHNAK      | AHNAK nucleoprotein                                                                           |
| 0,40528256  | 0,00382 | 0,437999158  | 0,00001 | AHNAK2     | AHNAK nucleoprotein 2                                                                         |
| 0,349169633 | 0,00065 | 0,645728675  | 0,00005 | AHNAK2     | AHNAK nucleoprotein 2                                                                         |
| 0,716977624 | 0,03488 | 0,846745312  | 0,02813 | AHSA2      | AHA1, activator of heat shock 90kDa protein ATPase homolog 2 (yeast)                          |
| 1,257884972 | 0,0471  | 1,189207115  | 0,00706 | AIF1       | allograft inflammatory factor 1                                                               |
| 1,51887169  | 0,00476 | 1,486582984  | 0,00004 | AIF1       | allograft inflammatory factor 1                                                               |
| 1,191682575 | 0,02748 | 1,132883885  | 0,01787 | AIG1       | androgen-induced 1                                                                            |
| 0,60667678  | 0,00856 | 0,724973416  | 0,00319 | AIM1L      | absent in melanoma 1-like                                                                     |
| 1,53368266  | 0,01255 | 1,417157397  | 0,01722 | AIM2       | absent in melanoma 2                                                                          |

|             |         |             |         |            |                                                                                                      |
|-------------|---------|-------------|---------|------------|------------------------------------------------------------------------------------------------------|
| 0,688247801 | 0,0341  | 0,63860688  | 0       | AIMP1      | aminoacyl tRNA synthetase complex-interacting multifunctional protein 1                              |
| 0,71400199  | 0,01804 | 0,793333843 | 0,00066 | AIMP2      | aminoacyl tRNA synthetase complex-interacting multifunctional protein 2                              |
| 0,704660378 | 0,02038 | 0,778085177 | 0,00007 | AIMP2      | aminoacyl tRNA synthetase complex-interacting multifunctional protein 2                              |
| 0,772175133 | 0,03559 | 0,836826243 | 0,03489 | AK3        | adenylate kinase 3                                                                                   |
| 0,646624466 | 0,00244 | 0,731028724 | 0,00019 | AK4        | adenylate kinase 4                                                                                   |
| 0,592546385 | 0,03978 | 0,734075318 | 0,00131 | AK4        | adenylate kinase 4                                                                                   |
| 0,516557194 | 0,00463 | 0,740719899 | 0,00039 | AK4        | adenylate kinase 4                                                                                   |
| 0,746906729 | 0,0438  | 0,828744904 | 0,02961 | AKAP1      | A kinase (PRKA) anchor protein 1                                                                     |
| 2,015307521 | 0,0051  | 1,404444876 | 0,00886 | AKAP12     | A kinase (PRKA) anchor protein 12                                                                    |
| 1,879045498 | 0,00393 | 1,249196126 | 0,04193 | AKAP12     | A kinase (PRKA) anchor protein 12                                                                    |
| 1,264003098 | 0,02202 | 1,247465572 | 0,00657 | AKIP1      | A kinase (PRKA) interacting protein 1                                                                |
| 1,638073396 | 0,00643 | 1,641483218 | 0,00001 | AKNA       | AT-hook transcription factor                                                                         |
| 1,702907415 | 0,01108 | 1,622254311 | 0,00001 | AKR1B1     | aldo-keto reductase family 1, member B1 (aldose reductase)                                           |
| 0,517273791 | 0,00296 | 0,709070018 | 0,01456 | AKR1B10    | aldo-keto reductase family 1, member B10 (aldose reductase)                                          |
| 1,184271612 | 0,02916 | 1,129747215 | 0,02012 | AKR1E2     | aldo-keto reductase family 1, member E2                                                              |
| 1,426025717 | 0,03352 | 1,155886707 | 0,02589 | AKT3       | v-akt murine thymoma viral oncogene homolog 3 (protein kinase B, gamma)                              |
| 0,562919293 | 0,0005  | 0,731028724 | 0,00034 | ALAD       | aminolevulinatase                                                                                    |
| 1,360370852 | 0,02435 | 1,376495602 | 0,00035 | ALAS2      | aminolevulinatase, delta-, synthase 2                                                                |
| 1,22603486  | 0,04267 | 1,205807828 | 0,02627 | ALDH1L2    | aldehyde dehydrogenase 1 family, member L2                                                           |
| 1,6724928   | 0,04899 | 1,684125907 | 0,00848 | ALDH1L2    | aldehyde dehydrogenase 1 family, member L2                                                           |
| 0,590087172 | 0,0018  | 0,806082831 | 0,0133  | ALDH2      | aldehyde dehydrogenase 2 family (mitochondrial)                                                      |
| 0,539614118 | 0,00035 | 0,712518807 | 0,00094 | ALDH3A2    | aldehyde dehydrogenase 3 family, member A2                                                           |
| 0,588861395 | 0,0043  | 0,734075318 | 0,00063 | ALDH3A2    | aldehyde dehydrogenase 3 family, member A2                                                           |
| 0,512989073 | 0,02076 | 0,614719434 | 0,00338 | ALDH3B2    | aldehyde dehydrogenase 3 family, member B2                                                           |
| 0,462011286 | 0,00309 | 0,657015814 | 0,00005 | ALDH3B2    | aldehyde dehydrogenase 3 family, member B2                                                           |
| 0,767373048 | 0,01705 | 0,772175133 | 0,00047 | ALDH9A1    | aldehyde dehydrogenase 9 family, member A1                                                           |
| 1,244011653 | 0,03893 | 1,144724161 | 0,02407 | ALG2       | asparagine-linked glycosylation 2, alpha-1,3-mannosyltransferase homolog (S. cerevisiae)             |
| 0,755759964 | 0,03465 | 0,847332435 | 0,00455 | ALKBH3     | alkB, alkylate repair homolog 3 (E. coli)                                                            |
| 0,34820287  | 0,00074 | 0,557096825 | 0,00407 | ALOX12B    | arachidonate 12-lipoxygenase, 12R type                                                               |
| 1,736280455 | 0,04546 | 1,671333918 | 0,00092 | ALOX15B    | arachidonate 15-lipoxygenase, type B                                                                 |
| 2,039195366 | 0,01489 | 1,93053405  | 0,00003 | ALOX15B    | arachidonate 15-lipoxygenase, type B                                                                 |
| 1,295042999 | 0,00308 | 1,382232207 | 0,00024 | ALOX5      | arachidonate 5-lipoxygenase                                                                          |
| 2,559744828 | 0,00031 | 1,830198336 | 0,00017 | ALOX5      | arachidonate 5-lipoxygenase                                                                          |
| 1,649467097 | 0,00219 | 1,630144665 | 0,00003 | ALOX5      | arachidonate 5-lipoxygenase                                                                          |
| 0,493116352 | 0,00222 | 0,729004689 | 0,0348  | ALOXE3     | arachidonate lipoxygenase 3                                                                          |
| 1,64832417  | 0,02455 | 1,531557997 | 0,00701 | ALPL       | alkaline phosphatase, liver/bone/kidney                                                              |
| 0,509445598 | 0,00289 | 0,741747467 | 0,00562 | ALS2CL     | ALS2 C-terminal like                                                                                 |
| 0,85086373  | 0,02882 | 0,855002178 | 0,00468 | ALS2CLR    | amyotrophic lateral sclerosis 2 (juvenile) chromosome region, candidate 8                            |
| 0,535144349 | 0,00034 | 0,688247801 | 0,00415 | AMACR      | alpha-methylacyl-CoA racemase                                                                        |
| 0,756283999 | 0,0063  | 0,814507563 | 0,02454 | AMD1       | adenosylmethionine decarboxylase 1                                                                   |
| 1,375541818 | 0,01217 | 1,466116757 | 0,00183 | AMICA1     | adhesion molecule, interacts with CXADR antigen 1                                                    |
| 0,491069798 | 0,00369 | 0,600818025 | 0,00013 | AMMECR1    | Alport syndrome, mental retardation, midface hypoplasia and elliptocytosis chromosomal region gene 1 |
| 0,727994774 | 0,02241 | 0,811127156 | 0,00162 | AMMECR1    | Alport syndrome, mental retardation, midface hypoplasia and elliptocytosis chromosomal region gene 1 |
| 0,657015814 | 0,00245 | 0,858565436 | 0,01012 | AMOTL1     | angiominin like 1                                                                                    |
| 0,683493726 | 0,00131 | 0,816768991 | 0,04666 | AMOTL1     | angiominin like 1                                                                                    |
| 2,70007597  | 0,00001 | 1,954771533 | 0,00002 | AMPD1      | adenosine monophosphate deaminase 1                                                                  |
| 1,244874235 | 0,02638 | 1,152686347 | 0,03743 | AMPD2      | adenosine monophosphate deaminase 2                                                                  |
| 0,683967652 | 0,0206  | 0,786217292 | 0,00588 | AMPD3      | adenosine monophosphate deaminase 3                                                                  |
| 0,743291492 | 0,01306 | 0,838568184 | 0,00716 | ANAPC1     | anaphase promoting complex subunit 1                                                                 |
| 1,365093718 | 0,00064 | 1,2397077   | 0,00029 | ANGEL1     | angel homolog 1 (Drosophila)                                                                         |
| 1,20664392  | 0,01636 | 1,163926534 | 0,00133 | ANGEL1     | angel homolog 1 (Drosophila)                                                                         |
| 1,840375301 | 0,02115 | 1,299539062 | 0,01198 | ANGPT1     | angiotensinogen 1                                                                                    |
| 1,25962998  | 0,0259  | 1,330529041 | 0,00048 | ANGPTL6    | angiotensinogen-like 6                                                                               |
| 1,254402205 | 0,01518 | 1,267512522 | 0,01884 | ANK1       | ankyrin 1, erythrocytic                                                                              |
| 0,336808394 | 0,00091 | 0,505225723 | 0,00002 | ANK3       | ankyrin 3, node of Ranvier (ankyrin G)                                                               |
| 0,542238704 | 0,01888 | 0,61985385  | 0       | ANK3       | ankyrin 3, node of Ranvier (ankyrin G)                                                               |
| 0,564091069 | 0,00514 | 0,669891801 | 0,00051 | ANK3       | ankyrin 3, node of Ranvier (ankyrin G)                                                               |
| 0,628506687 | 0,00205 | 0,750539549 | 0,00858 | ANK3       | ankyrin 3, node of Ranvier (ankyrin G)                                                               |
| 0,678302164 | 0,00473 | 0,750539549 | 0,00454 | ANKRD11    | ankyrin repeat domain 11                                                                             |
| 0,44534645  | 0,00443 | 0,611320139 | 0,00003 | ANKRD22    | ankyrin repeat domain 22                                                                             |
| 0,581157054 | 0,03533 | 0,724471077 | 0,00002 | ANKRD22    | ankyrin repeat domain 22                                                                             |
| 1,304050735 | 0,00598 | 1,139973273 | 0,02826 | ANKRD26P3  | ankyrin repeat domain 26 pseudogene 3                                                                |
| 0,575943821 | 0,04295 | 0,501735874 | 0,00001 | ANKRD29    | ankyrin repeat domain 29                                                                             |
| 0,56097174  | 0,01671 | 0,50557604  | 0,00002 | ANKRD29    | ankyrin repeat domain 29                                                                             |
| 0,376572617 | 0,00055 | 0,571173123 | 0,00033 | ANKRD35    | ankyrin repeat domain 35                                                                             |
| 2,87786716  | 0,00003 | 2,174976782 | 0,00031 | ANKRD36BP2 | ankyrin repeat domain 36B pseudogene 2                                                               |
| 4,636383808 | 0,0003  | 4,25748073  | 0,00106 | ANKRD36BP2 | ankyrin repeat domain 36B pseudogene 2                                                               |
| 1,221793102 | 0,00756 | 1,128182137 | 0,02204 | ANKRD44    | ankyrin repeat domain 44                                                                             |
| 0,763658749 | 0,01347 | 0,827596816 | 0,00353 | ANKRD5     | ankyrin repeat domain 5                                                                              |
| 0,529242197 | 0,01059 | 0,597495602 | 0,0001  | ANKRD57    | ankyrin repeat domain 57                                                                             |
| 0,503477775 | 0,00485 | 0,5         | 0       | ANKRD6     | ankyrin repeat domain 6                                                                              |
| 0,588861395 | 0,01126 | 0,652025368 | 0,00016 | ANKRD6     | ankyrin repeat domain 6                                                                              |
| 0,753667455 | 0,00628 | 0,78024548  | 0,00022 | ANKS1A     | ankyrin repeat and sterile alpha motif domain containing 1A                                          |
| 0,61301743  | 0,03874 | 0,796088099 | 0,04292 | ANLN       | anillin, actin binding protein                                                                       |
| 0,612168196 | 0,0016  | 0,704660378 | 0,00313 | ANO1       | anoctamin 1, calcium activated chloride channel                                                      |
| 0,84264683  | 0,04921 | 0,76154437  | 0,00012 | ANO10      | anoctamin 10                                                                                         |
| 1,237990291 | 0,01643 | 1,149494848 | 0,00683 | ANO4       | anoctamin 4                                                                                          |
| 1,214194884 | 0,02668 | 1,217566019 | 0,00036 | ANO7       | anoctamin 7                                                                                          |
| 0,786762445 | 0,03584 | 0,813943185 | 0,00399 | ANO7L1     | anoctamin 7-like 1                                                                                   |
| 1,384149716 | 0,00556 | 1,248330549 | 0,0016  | ANTXR1     | anthrax toxin receptor 1                                                                             |
| 0,61985385  | 0,0034  | 0,790041312 | 0,00584 | ANXA4      | annexin A4                                                                                           |
| 1,997229332 | 0,00398 | 2,02791896  | 0       | ANXA6      | annexin A6                                                                                           |
| 0,682546859 | 0,0011  | 0,757333158 | 0,03218 | ANXA7      | annexin A7                                                                                           |
| 1,486582984 | 0,00038 | 1,309485423 | 0,01881 | AOC3       | amine oxidase, copper containing 3 (vascular adhesion protein 1)                                     |
| 0,722966147 | 0,02324 | 0,777007269 | 0,00618 | AP1AR      | adaptor-related protein complex 1 associated regulatory protein                                      |
| 0,672217497 | 0,03503 | 0,626322219 | 0,0402  | AP1S3      | adaptor-related protein complex 1, sigma 3 subunit                                                   |
| 1,2397077   | 0,00286 | 1,21335356  | 0,00069 | AP3S2      | adaptor-related protein complex 3, sigma 2 subunit                                                   |
| 0,763129604 | 0,01313 | 0,782411782 | 0,00469 | AP4S1      | adaptor-related protein complex 4, sigma 1 subunit                                                   |
| 1,472226862 | 0,004   | 1,155085785 | 0,01747 | APBB1IP    | amyloid beta (A4) precursor protein-binding, family B, member 1 interacting protein                  |
| 2,040609318 | 0,00016 | 1,821339667 | 0,00006 | APBB1IP    | amyloid beta (A4) precursor protein-binding, family B, member 1 interacting protein                  |
| 1,275444392 | 0,04997 | 1,174461971 | 0,01449 | APBB2      | amyloid beta (A4) precursor protein-binding, family B, member 2                                      |
| 0,66342257  | 0,03852 | 0,70759708  | 0,00958 | APC        | adenomatous polyposis coli                                                                           |
| 1,542210825 | 0,00032 | 1,427014506 | 0,00001 | APH1B      | anterior pharynx defective 1 homolog B (C. elegans)                                                  |
| 1,32408891  | 0,04584 | 1,235418637 | 0,01294 | APH1B      | anterior pharynx defective 1 homolog B (C. elegans)                                                  |
| 0,71548826  | 0,01431 | 0,739181216 | 0,00016 | API5       | apoptosis inhibitor 5                                                                                |
| 0,657927263 | 0,03579 | 0,680657058 | 0,00012 | API5       | apoptosis inhibitor 5                                                                                |
| 1,977941833 | 0,00152 | 1,938579634 | 0,00005 | APLNR      | apelin receptor                                                                                      |
| 1,400556321 | 0,03549 | 1,248330549 | 0,00763 | APOBEC3F   | apolipoprotein B mRNA editing enzyme, catalytic polypeptide-like 3F                                  |

|             |         |             |         |             |                                                                                         |
|-------------|---------|-------------|---------|-------------|-----------------------------------------------------------------------------------------|
| 2,076278541 | 0,00131 | 1,575707772 | 0,00139 | APOBEC3G    | apolipoprotein B mRNA editing enzyme, catalytic polypeptide-like 3G                     |
| 1,298638603 | 0,00594 | 1,175276328 | 0,00188 | APOBEC3G    | apolipoprotein B mRNA editing enzyme, catalytic polypeptide-like 3G                     |
| 1,609932275 | 0,00095 | 1,496922987 | 0,00089 | APOC1       | apolipoprotein C-I                                                                      |
| 1,707635429 | 0,04977 | 2,012515647 |         | O APOE      | apolipoprotein E                                                                        |
| 1,938579634 | 0,00001 | 1,262252032 | 0,00003 | APOL6       | apolipoprotein L, 6                                                                     |
| 1,867359899 | 0,03178 | 1,943961976 |         | O APOL6     | apolipoprotein L, 6                                                                     |
| 1,839100092 | 0,02631 | 1,506290467 | 0,00045 | APOLD1      | apolipoprotein L domain containing 1                                                    |
| 0,610896551 | 0,01281 | 0,733566672 | 0,00637 | APOOL       | apolipoprotein O-like                                                                   |
| 0,799960128 | 0,03113 | 0,756808396 | 0,00175 | APOOL       | apolipoprotein O-like                                                                   |
| 1,546492675 | 0,00731 | 1,355664327 | 0,03037 | APP         | amyloid beta (A4) precursor protein                                                     |
| 0,690158677 | 0,03813 | 0,684441907 | 0,00046 | APPL1       | adaptor protein, phosphotyrosine interaction, PH domain and leucine zipper containing 1 |
| 0,612592666 | 0,02216 | 0,735093668 | 0,02844 | APPL2       | adaptor protein, phosphotyrosine interaction, PH domain and leucine zipper containing 2 |
| 0,674551267 | 0,01183 | 0,847332435 |         | O,0459 APRT | adenine phosphoribosyltransferase                                                       |
| 0,792784137 | 0,0302  | 0,879649076 | 0,00603 | AQP3        | aquaporin 3 (Gill blood group)                                                          |
| 1,719512972 | 0,00207 | 1,492778383 | 0,00073 | AQP9        | aquaporin 9                                                                             |
| 0,346277367 | 0,00882 | 0,552099424 |         | O ARAP2     | ArfGAP with RhoGAP domain, ankyrin repeat and PH domain 2                               |
| 0,637722196 | 0,048   | 0,743291492 | 0,00012 | ARF6        | ADP-ribosylation factor 6                                                               |
| 0,675018993 | 0,0348  | 0,756808396 | 0,00001 | ARFGEF1     | ADP-ribosylation factor guanine nucleotide-exchange factor 1 (brefeldin A-inhibited)    |
| 0,219607617 | 0,00685 | 0,595428425 | 0,04657 | ARG1        | arginase, liver                                                                         |
| 1,880348405 | 0,00015 | 1,605474777 | 0,00003 | ARHGAP15    | Rho GTPase activating protein 15                                                        |
| 0,777007269 | 0,00768 | 0,824162085 | 0,01748 | ARHGAP21    | Rho GTPase activating protein 21                                                        |
| 1,869950396 | 0,00005 | 1,659789171 | 0,00002 | ARHGAP25    | Rho GTPase activating protein 25                                                        |
| 1,748357241 | 0,00003 | 1,466116757 | 0,00007 | ARHGAP25    | Rho GTPase activating protein 25                                                        |
| 1,479387509 | 0,00208 | 1,2397077   | 0,00558 | ARHGAP26    | Rho GTPase activating protein 26                                                        |
| 0,564091069 | 0,01719 | 0,791685866 | 0,04614 | ARHGAP32    | Rho GTPase activating protein 32                                                        |
| 0,632439771 | 0,0321  | 0,7031966   | 0,01312 | ARHGAP32    | Rho GTPase activating protein 32                                                        |
| 1,268391399 | 0,01089 | 1,136816973 | 0,02273 | ARHGAP33    | Rho GTPase activating protein 33                                                        |
| 2,149498346 | 0,00006 | 1,830198336 | 0,00019 | ARHGAP9     | Rho GTPase activating protein 9                                                         |
| 1,854461093 | 0,00001 | 1,555092072 | 0,00001 | ARHGAP9     | Rho GTPase activating protein 9                                                         |
| 1,797510253 | 0,00537 | 1,805001455 | 0,00002 | ARHGAP9     | Rho GTPase activating protein 9                                                         |
| 1,59549048  | 0,00011 | 1,581178233 | 0,00004 | ARHGDI8     | Rho GDP dissociation inhibitor (GDI) beta                                               |
| 0,773246337 | 0,03816 | 0,848507902 | 0,01511 | ARHGEF10L   | Rho guanine nucleotide exchange factor (GEF) 10-like                                    |
| 0,816768991 | 0,02981 | 0,808881348 | 0,00245 | ARHGEF12    | Rho guanine nucleotide exchange factor (GEF) 12                                         |
| 0,603740296 | 0,0066  | 0,802181166 | 0,02185 | ARHGEF12    | Rho guanine nucleotide exchange factor (GEF) 12                                         |
| 1,76418273  | 0,00107 | 1,565908593 | 0,00046 | ARHGEF2     | Rho/Rac guanine nucleotide exchange factor (GEF) 2                                      |
| 0,503826888 | 0,00045 | 0,710053679 | 0,00066 | ARHGEF37    | Rho guanine nucleotide exchange factor (GEF) 37                                         |
| 0,589269704 | 0,04457 | 0,79940583  | 0,02041 | ARHGEF4     | Rho guanine nucleotide exchange factor (GEF) 4                                          |
| 1,360370852 | 0,0037  | 1,354724977 | 0,00056 | ARHGEF40    | Rho guanine nucleotide exchange factor (GEF) 40                                         |
| 1,481439798 | 0,0146  | 1,304954948 | 0,02313 | ARHGEF40    | Rho guanine nucleotide exchange factor (GEF) 40                                         |
| 0,711038705 | 0,04405 | 0,62981499  | 0,00042 | ARID2       | AT rich interactive domain 2 (ARID, RFX-like)                                           |
| 1,453972517 | 0,00515 | 1,485552921 | 0,00001 | ARID3A      | AT rich interactive domain 3A (BRIGHT-like)                                             |
| 1,30224419  | 0,01704 | 1,244011653 | 0,00195 | ARID4B      | AT rich interactive domain 4B (RBP1-like)                                               |
| 1,280759861 | 0,04363 | 1,209994089 | 0,01622 | ARID5A      | AT rich interactive domain 5A (MRF1-like)                                               |
| 0,741233505 | 0,02135 | 0,825305409 | 0,00191 | ARL4C       | ADP-ribosylation factor-like 4C                                                         |
| 0,628506687 | 0,04901 | 0,648419777 | 0,00058 | ARL5A       | ADP-ribosylation factor-like 5A                                                         |
| 0,582770599 | 0,02826 | 0,716480825 | 0,00068 | ARL5B       | ADP-ribosylation factor-like 5B                                                         |
| 0,644834125 | 0,02319 | 0,810003474 | 0,00587 | ARL8B       | ADP-ribosylation factor-like 8B                                                         |
| 0,664803554 | 0,00635 | 0,786217292 | 0,02354 | ARL8B       | ADP-ribosylation factor-like 8B                                                         |
| 0,61429349  | 0,00169 | 0,697371833 | 0,00003 | ARL9        | ADP-ribosylation factor-like 9                                                          |
| 0,607939642 | 0,0268  | 0,785128119 | 0,00034 | ARMC10      | armadillo repeat containing 10                                                          |
| 0,798298386 | 0,01499 | 0,829319546 | 0,02116 | ARMC10      | armadillo repeat containing 10                                                          |
| 1,649467097 | 0,00786 | 1,414213562 | 0,00129 | ARMCX3      | armadillo repeat containing, X-linked 3                                                 |
| 1,423063461 | 0,03206 | 1,368883813 | 0,00559 | ARMCX3      | armadillo repeat containing, X-linked 3                                                 |
| 1,261377409 | 0,03347 | 1,128182137 | 0,02982 | ARMCX4      | armadillo repeat containing, X-linked 4                                                 |
| 0,796640096 | 0,04521 | 0,806641759 | 0,00395 | ARNT        | aryl hydrocarbon receptor nuclear translocator                                          |
| 0,686818117 | 0,00779 | 0,777546036 | 0,03827 | ARNTL2      | aryl hydrocarbon receptor nuclear translocator-like 2                                   |
| 0,76684133  | 0,01141 | 0,867538687 | 0,01904 | ARPC2       | actin related protein 2/3 complex, subunit 2, 34kDa                                     |
| 0,819604608 | 0,049   | 0,829319546 | 0,00013 | ARPC5L      | actin related protein 2/3 complex, subunit 5-like                                       |
| 1,542210825 | 0,01082 | 1,506290467 | 0,00023 | ARRB2       | arrestin, beta 2                                                                        |
| 0,443498153 | 0,01386 | 0,627201102 | 0,00016 | ARRDC4      | arrestin domain containing 4                                                            |
| 1,484523571 | 0,02875 | 1,557249382 | 0,00147 | ARSA        | arylsulfatase A                                                                         |
| 0,747942879 | 0,01929 | 0,827023368 | 0,01219 | ARV1        | ARV1 homolog (S. cerevisiae)                                                            |
| 1,744725412 | 0,00195 | 1,394743666 | 0,00037 | ARX         | aristaless related homeobox                                                             |
| 0,631563631 | 0,00014 | 0,771640088 | 0,01188 | ASAP3       | ArfGAP with SH3 domain, ankyrin repeat and PH domain 3                                  |
| 0,742261785 | 0,02495 | 0,738157203 | 0,00269 | ASCL2       | achaete-scute complex homolog 2 (Drosophila)                                            |
| 0,791137301 | 0,00856 | 0,856781955 | 0,00444 | ASH2L       | ash2 (absent, small, or homeotic)-like (Drosophila)                                     |
| 0,673616788 | 0,01268 | 0,816203046 | 0,01244 | ASPM        | asp (abnormal spindle) homolog, microcephaly associated (Drosophila)                    |
| 1,4054187   | 0,00111 | 1,298638603 | 0,00177 | ASRGL1      | asparaginase like 1                                                                     |
| 1,363202607 | 0,0032  | 1,343503426 | 0,00096 | ASRGL1      | asparaginase like 1                                                                     |
| 1,311302014 | 0,00696 | 1,162314108 | 0,02172 | ASTN2       | astrotactin 2                                                                           |
| 1,501079098 | 0,00973 | 1,145517898 | 0,0452  | ASXL1       | additional sex combs like 1 (Drosophila)                                                |
| 0,689202576 | 0,00657 | 0,653382627 |         | O ATAD2     | ATPase family, AAA domain containing 2                                                  |
| 1,417157397 | 0,02765 | 1,421092043 | 0,00152 | ATF5        | activating transcription factor 5                                                       |
| 1,231144413 | 0,01056 | 1,148698355 | 0,0216  | ATF7        | activating transcription factor 7                                                       |
| 1,343503426 | 0,02845 | 1,280759861 | 0,00064 | ATF7        | activating transcription factor 7                                                       |
| 1,351910833 | 0,03321 | 1,256142381 | 0,00193 | ATF7IP2     | activating transcription factor 7 interacting protein 2                                 |
| 0,679714121 | 0,01514 | 0,790589117 | 0,00027 | ATG3        | ATG3 autophagy related 3 homolog (S. cerevisiae)                                        |
| 1,43097652  | 0,02603 | 1,442928687 | 0,00032 | ATHL1       | ATH1, acid trehalase-like 1 (yeast)                                                     |
| 0,527045712 | 0,01765 | 0,67877249  | 0,01455 | ATL2        | atlastin GTPase 2                                                                       |
| 0,514056913 | 0,00329 | 0,659296807 | 0,00105 | ATL2        | atlastin GTPase 2                                                                       |
| 0,796088099 | 0,00735 | 0,852044095 | 0,01159 | ATMIN       | ATM interactor                                                                          |
| 0,541862983 | 0,00813 | 0,635515845 |         | O ATMIN     | ATM interactor                                                                          |
| 0,546767729 | 0,00591 | 0,716480825 | 0,00049 | ATP10B      | ATPase, class V, type 10B                                                               |
| 0,506277404 | 0,00555 | 0,623732786 | 0,00011 | ATP10D      | ATPase, class V, type 10D                                                               |
| 0,574349177 | 0,02122 | 0,635956503 | 0,00067 | ATP13A4     | ATPase type 13A4                                                                        |
| 0,575943821 | 0,02944 | 0,788400174 | 0,00063 | ATP1B3      | ATPase, Na+/K+ transporting, beta 3 polypeptide                                         |
| 0,733566672 | 0,03306 | 0,76630998  | 0,00034 | ATP2A2      | ATPase, Ca++ transporting, cardiac muscle, slow twitch 2                                |
| 1,708819482 | 0,03081 | 1,42899414  | 0,00138 | ATP2A3      | ATPase, Ca++ transporting, ubiquitous                                                   |
| 2,262628926 | 0,00207 | 2,130216407 | 0,00006 | ATP2A3      | ATPase, Ca++ transporting, ubiquitous                                                   |
| 2,070529848 | 0,00247 | 1,89605393  |         | O ATP2A3    | ATPase, Ca++ transporting, ubiquitous                                                   |
| 1,673652485 | 0,00342 | 1,299539062 | 0,00327 | ATP2A3      | ATPase, Ca++ transporting, ubiquitous                                                   |
| 0,792784137 | 0,02962 | 0,817902059 | 0,00101 | ATP2C1      | ATPase, Ca++ transporting, type 2C, member 1                                            |
| 0,671286251 | 0,03135 | 0,79774524  | 0,00299 | ATP2C2      | ATPase, Ca++ transporting, type 2C, member 2                                            |
| 0,73153561  | 0,03549 | 0,852044095 | 0,01828 | ATP5F1      | ATP synthase, H+ transporting, mitochondrial Fo complex, subunit B1                     |
| 0,53329289  | 0,04905 | 0,815072332 | 0,0014  | ATP5H       | ATP synthase, H+ transporting, mitochondrial Fo complex, subunit d                      |
| 0,775930854 | 0,03107 | 0,871154192 | 0,03083 | ATP5I       | ATP synthase, H+ transporting, mitochondrial Fo complex, subunit E                      |
| 0,636838738 | 0,04094 | 0,889458994 | 0,01319 | ATP5O       | ATP synthase, H+ transporting, mitochondrial F1 complex, O subunit                      |
| 0,786217292 | 0,04705 | 0,801069878 | 0,01791 | ATP5S       | ATP synthase, H+ transporting, mitochondrial Fo complex, subunit s (factor B)           |

|             |         |             |         |          |                                                                                       |
|-------------|---------|-------------|---------|----------|---------------------------------------------------------------------------------------|
| 0,680185426 | 0,01924 | 0,641712949 | 0,00031 | ATP55    | ATP synthase, H+ transporting, mitochondrial Fo complex, subunit s (factor B)         |
| 0,242490478 | 0,00006 | 0,43587912  | 0,00027 | ATP6V1C2 | ATPase, H+ transporting, lysosomal 42kDa, V1 subunit C2                               |
| 0,501040803 | 0,00014 | 0,732042848 | 0,03417 | ATP6V1C2 | ATPase, H+ transporting, lysosomal 42kDa, V1 subunit C2                               |
| 0,607939642 | 0,01746 | 0,84264683  | 0,00924 | ATP6V1H  | ATPase, H+ transporting, lysosomal 50/57kDa, V1 subunit H                             |
| 1,777685362 | 0,02127 | 1,470187336 | 0,00661 | ATP8A1   | ATPase, aminophospholipid transporter (APLT), class I, type 8A, member 1              |
| 1,226884977 | 0,03158 | 1,243149669 | 0,00166 | ATP8A2   | ATPase, aminophospholipid transporter, class I, type 8A, member 2                     |
| 0,651573575 | 0,04826 | 0,816768991 | 0,01022 | ATP8B1   | ATPase, aminophospholipid transporter, class I, type 8B, member 1                     |
| 0,685866644 | 0,00819 | 0,820741609 | 0,00622 | ATP9A    | ATPase, class II, type 9A                                                             |
| 0,635956503 | 0,04051 | 0,712025098 | 0,03023 | ATRX     | alpha thalassaemia/mental retardation syndrome X-linked                               |
| 0,772175133 | 0,03054 | 0,852634892 | 0,00535 | ATXN10   | ataxin 10                                                                             |
| 0,560194607 | 0,00214 | 0,700763725 | 0,00001 | ATXN3    | ataxin 3                                                                              |
| 0,714992493 | 0,0099  | 0,793333843 | 0,00596 | AZI2     | 5-azacytidine induced 2                                                               |
| 0,713507253 | 0,00811 | 0,844400887 | 0,03221 | B3GALNT2 | beta-1,3-N-acetylgalactosaminyltransferase 2                                          |
| 0,631563631 | 0,00995 | 0,782954296 | 0,00003 | B3GALNT2 | beta-1,3-N-acetylgalactosaminyltransferase 2                                          |
| 0,61429349  | 0,04982 | 0,574747424 | 0,00001 | B3GNT5   | UDP-GlcNAc:betaGal beta-1,3-N-acetylglucosaminyltransferase 5                         |
| 1,446934886 | 0,0145  | 1,294145654 | 0,00002 | B4GALT3  | UDP-Gal:betaGlcNAc beta 1,4- galactosyltransferase, polypeptide 3                     |
| 1,377450046 | 0,00834 | 1,358486285 | 0,00113 | B4GALT5  | UDP-Gal:betaGlcNAc beta 1,4- galactosyltransferase, polypeptide 5                     |
| 1,500038989 | 0,03691 | 1,375541818 | 0,00118 | B9D1     | B9 protein domain 1                                                                   |
| 0,674083866 | 0,04619 | 0,754190038 | 0,00173 | BACH2    | BTB and CNC homology 1, basic leucine zipper transcription factor 2                   |
| 0,727490342 | 0,00443 | 0,793333843 | 0,00008 | BAG3     | BCL2-associated athanogene 3                                                          |
| 0,539614118 | 0,00053 | 0,718470088 | 0,00001 | BAG5     | BCL2-associated athanogene 5                                                          |
| 0,44813335  | 0,00028 | 0,517632462 | 0,00001 | BAMBI    | BMP and activin membrane-bound inhibitor homolog (Xenopus laevis)                     |
| 2,24699806  | 0,00051 | 1,504203751 | 0,03044 | BANK1    | B-cell scaffold protein with ankyrin repeats 1                                        |
| 1,510472586 | 0,00083 | 1,368883813 | 0,00083 | BASP1    | brain abundant, membrane attached signal protein 1                                    |
| 1,439931319 | 0,00643 | 1,321338406 | 0,00048 | BATF     | basic leucine zipper transcription factor, ATF-like                                   |
| 1,252664439 | 0,03184 | 1,132883885 | 0,03508 | BAZ2A    | bromodomain adjacent to zinc finger domain, 2A                                        |
| 1,250062303 | 0,03564 | 1,180174343 | 0,01363 | BBC3     | BCL2 binding component 3                                                              |
| 0,713507253 | 0,02809 | 0,740206649 | 0,01189 | BBIP1    | BBSome interacting protein 1                                                          |
| 0,44813335  | 0,00403 | 0,638164384 | 0,00225 | BBIP1    | BBSome interacting protein 1                                                          |
| 0,441657526 | 0,00144 | 0,553632292 | 0,00007 | BBOX1    | butyrobetaine (gamma), 2-oxoglutarate dioxygenase (gamma-butyrobetaine hydroxylase) 1 |
| 0,6341957   | 0,00257 | 0,778085177 | 0,00262 | BBS2     | Bardet-Biedl syndrome 2                                                               |
| 0,66158572  | 0,00843 | 0,71400199  | 0,00002 | BCAS2    | breast carcinoma amplified sequence 2                                                 |
| 1,286989247 | 0,02049 | 1,210833084 | 0,00618 | BCAT1    | branched chain amino-acid transaminase 1, cytosolic                                   |
| 2,228387302 | 0,03303 | 1,526259209 | 0,00991 | BCAT1    | branched chain amino-acid transaminase 1, cytosolic                                   |
| 0,700763725 | 0,00936 | 0,706616822 | 0       | BCCIP    | BRCA2 and CDKN1A interacting protein                                                  |
| 0,488692883 | 0,00195 | 0,677362489 | 0,00027 | BCL11B   | B-cell CLL/lymphoma 11B (zinc finger protein)                                         |
| 1,542210825 | 0,04076 | 1,223488041 | 0,02901 | BCL2     | B-cell CLL/lymphoma 2                                                                 |
| 0,536630143 | 0,0081  | 0,635956503 | 0,00016 | BCL2L10  | BCL2-like 10 (apoptosis facilitator)                                                  |
| 2,582914701 | 0,00159 | 1,864772973 | 0       | BCL2L11  | BCL2-like 11 (apoptosis facilitator)                                                  |
| 1,305859787 | 0,00591 | 1,154285418 | 0,02679 | BCL2L11  | BCL2-like 11 (apoptosis facilitator)                                                  |
| 0,663882579 | 0,00759 | 0,857376037 | 0,00846 | BCL2L13  | BCL2-like 13 (apoptosis facilitator)                                                  |
| 1,411275843 | 0,00648 | 1,196648963 | 0,01149 | BCL2L14  | BCL2-like 14 (apoptosis facilitator)                                                  |
| 0,602068691 | 0,0048  | 0,721964598 | 0,00047 | BCL2L2   | BCL2-like 2                                                                           |
| 0,697371833 | 0,04005 | 0,803293997 | 0,00261 | BCLAF1   | BCL2-associated transcription factor 1                                                |
| 0,628942486 | 0,01224 | 0,786762445 | 0,01    | BCLAF1   | BCL2-associated transcription factor 1                                                |
| 0,586011142 | 0,00439 | 0,828170661 | 0,041   | BDH1     | 3-hydroxybutyrate dehydrogenase, type 1                                               |
| 0,739181216 | 0,02479 | 0,847919965 | 0,01445 | BDKRB1   | bradykinin receptor B1                                                                |
| 0,587230986 | 0,01031 | 0,737134609 | 0,00007 | BDKRB2   | bradykinin receptor B2                                                                |
| 0,433769344 | 0,00001 | 0,646624466 | 0,00056 | BDNF     | brain-derived neurotrophic factor                                                     |
| 0,557869661 | 0,00208 | 0,685391402 | 0,00001 | BDP1     | B double prime 1, subunit of RNA polymerase III transcription initiation factor IIIB  |
| 1,336074078 | 0,02512 | 1,217556019 | 0,01665 | BET1L    | blocked early in transport 1 homolog (S. cerevisiae)-like                             |
| 1,368883813 | 0,01201 | 1,123499903 | 0,03224 | BFSF2    | beaded filament structural protein 2, phakinin                                        |
| 1,997229332 | 0,00921 | 1,880348405 | 0,00062 | BHLHE41  | basic helix-loop-helix family, member e41                                             |
| 1,256142381 | 0,00905 | 1,170398641 | 0,01165 | BICD1    | bicaudal D homolog 1 (Drosophila)                                                     |
| 0,403600537 | 0,00235 | 0,631126016 | 0,00915 | BICD2    | bicaudal D homolog 2 (Drosophila)                                                     |
| 0,510860041 | 0,00261 | 0,692554734 | 0,0001  | BICD2    | bicaudal D homolog 2 (Drosophila)                                                     |
| 1,969732886 | 0,00037 | 1,830198336 | 0,00001 | BIN2     | bridging integrator 2                                                                 |
| 1,32408891  | 0,01956 | 1,285206337 | 0,00986 | BIRC3    | baculoviral IAP repeat containing 3                                                   |
| 0,646624466 | 0,00619 | 0,801625329 | 0,03321 | BIVM     | basic, immunoglobulin-like variable motif containing                                  |
| 1,362258035 | 0,00973 | 1,189207115 | 0,01496 | BLK      | B lymphoid tyrosine kinase                                                            |
| 1,404444876 | 0,00247 | 1,331451613 | 0,00031 | BLM      | Bloom syndrome, RecQ helicase-like                                                    |
| 0,553632292 | 0,00093 | 0,664803554 | 0,00003 | BLOC1S2  | biogenesis of lysosomal organelles complex-1, subunit 2                               |
| 0,620713746 | 0,01686 | 0,74277646  | 0,0096  | BLVRA    | biliverdin reductase A                                                                |
| 0,802181166 | 0,02327 | 0,859756486 | 0,00432 | BLVRA    | biliverdin reductase A                                                                |
| 0,768437591 | 0,00879 | 0,847332435 | 0,00233 | BLVRA    | biliverdin reductase A                                                                |
| 0,735093668 | 0,04452 | 0,69640574  | 0,00042 | BLZF1    | basic leucine zipper nuclear factor 1                                                 |
| 1,486582984 | 0,00131 | 1,640345822 | 0,00001 | BMF      | Bcl2 modifying factor                                                                 |
| 2,414961183 | 0       | 1,834008086 | 0,00007 | BMP6     | bone morphogenetic protein 6                                                          |
| 1,311302014 | 0,01922 | 1,104964485 | 0,04504 | BMP8A    | bone morphogenetic protein 8a                                                         |
| 1,257013375 | 0,04283 | 1,185092771 | 0,00311 | BMP8B    | bone morphogenetic protein 8b                                                         |
| 0,571569168 | 0,01567 | 0,688725023 | 0,00552 | BMPR1B   | bone morphogenetic protein receptor, type IB                                          |
| 0,698339266 | 0,01646 | 0,830470024 | 0,03513 | BMPR2    | bone morphogenetic protein receptor, type II (serine/threonine kinase)                |
| 1,318593614 | 0,01467 | 1,183451022 | 0,00621 | BMX      | BMX non-receptor tyrosine kinase                                                      |
| 0,497924877 | 0,00613 | 0,520871715 | 0,00008 | BNC1     | basonuclin 1                                                                          |
| 0,452816992 | 0,00722 | 0,648419777 | 0,00869 | BNIP3    | BCL2/adenovirus E1B 19kDa interacting protein 3                                       |
| 0,583174685 | 0,00173 | 0,798851916 | 0,03396 | BNIP3L   | BCL2/adenovirus E1B 19kDa interacting protein 3-like                                  |
| 0,391205891 | 0,00336 | 0,599569957 | 0,01053 | BNIP1    | BCL2/adenovirus E1B 19kD interacting protein like                                     |
| 0,325561047 | 0,00002 | 0,547905883 | 0,00004 | BNIP1L   | BCL2/adenovirus E1B 19kD interacting protein like                                     |
| 0,509445598 | 0,00093 | 0,528142813 | 0,00001 | BPGM     | 2,3-bisphosphoglycerate mutase                                                        |
| 0,259175275 | 0,00001 | 0,445655248 | 0,00035 | BPIFC    | BPI fold containing family C                                                          |
| 0,69495911  | 0,03981 | 0,837987135 | 0,00152 | BPTF     | bromodomain PHD finger transcription factor                                           |
| 0,821310701 | 0,02486 | 0,886381699 | 0,03959 | BRAF     | v-raf murine sarcoma viral oncogene homolog B1                                        |
| 0,471719125 | 0,04095 | 0,678302164 | 0,01469 | BRCC3    | BRCA1/BRCA2-containing complex, subunit 3                                             |
| 0,590905773 | 0,00525 | 0,745872013 | 0,00024 | BRCC3    | BRCA1/BRCA2-containing complex, subunit 3                                             |
| 0,645728675 | 0,00765 | 0,771105413 | 0,00043 | BRCC3    | BRCA1/BRCA2-containing complex, subunit 3                                             |
| 0,697855382 | 0,0417  | 0,704172113 | 0,00208 | BRCC3    | BRCA1/BRCA2-containing complex, subunit 3                                             |
| 0,748980467 | 0,00876 | 0,758383773 | 0,00208 | BRD1     | bromodomain containing 1                                                              |
| 0,782411782 | 0,04375 | 0,813379198 | 0,00863 | BRD1     | bromodomain containing 1                                                              |
| 0,571569168 | 0,01785 | 0,828744904 | 0,00135 | BRD7     | bromodomain containing 7                                                              |
| 0,685866644 | 0,02591 | 0,738157203 | 0,00012 | BROX     | BRO1 domain and CAAX motif containing                                                 |
| 0,755759964 | 0,04081 | 0,763658749 | 0,03222 | BRWD1    | bromodomain and WD repeat domain containing 1                                         |
| 0,50382688  | 0,00006 | 0,622005827 | 0       | BSPRY    | B-box and SPRY domain containing                                                      |
| 0,495171436 | 0,00224 | 0,621144141 | 0,00011 | BSPRY    | B-box and SPRY domain containing                                                      |
| 0,613442489 | 0,02223 | 0,748461493 | 0,00164 | BTBD11   | BTB (POZ) domain containing 11                                                        |
| 0,741747467 | 0,00075 | 0,813379198 | 0,00083 | BTBD6    | BTB (POZ) domain containing 6                                                         |
| 0,615145672 | 0,01805 | 0,791685866 | 0,00073 | BTF3     | basic transcription factor 3                                                          |
| 0,583174685 | 0,00801 | 0,793883931 | 0,00049 | BTF3     | basic transcription factor 3                                                          |
| 0,720964436 | 0,04681 | 0,755236293 | 0,00015 | BTF3     | basic transcription factor 3                                                          |

|             |         |             |         |           |                                                        |
|-------------|---------|-------------|---------|-----------|--------------------------------------------------------|
| 0,682073917 | 0,00462 | 0,812815602 | 0,00028 | BTF3      | basic transcription factor 3                           |
| 0,705637922 | 0,01121 | 0,717474767 | 0,00095 | BTF3L4    | basic transcription factor 3-like 4                    |
| 1,987562187 | 0,02552 | 1,762960316 | 0,00016 | BTG2      | BTG family, member 2                                   |
| 3,099423724 | 0       | 2,165950091 | 0       | BTG2      | BTG family, member 2                                   |
| 0,603740296 | 0,00215 | 0,719965659 | 0,00312 | BTG3      | BTG family, member 3                                   |
| 0,59295725  | 0,00066 | 0,738157203 | 0,00492 | BTG3      | BTG family, member 3                                   |
| 0,565265284 | 0,00118 | 0,688725023 | 0,0002  | BTG3      | BTG family, member 3                                   |
| 1,649467097 | 0,00005 | 1,583371732 | 0,00004 | BTK       | Bruton agammaglobulinemia tyrosine kinase              |
| 1,379360922 | 0,02079 | 1,21335356  | 0,00186 | BTN2A2    | butyrophilin, subfamily 2, member A2                   |
| 1,400556321 | 0,03731 | 1,340712592 | 0,00107 | BTN3A1    | butyrophilin, subfamily 3, member A1                   |
| 1,446934886 | 0,01068 | 1,464085696 | 0,00006 | BTN3A3    | butyrophilin, subfamily 3, member A3                   |
| 0,655196702 | 0,01724 | 0,799960128 | 0,00014 | BTRC      | beta-transducin repeat containing                      |
| 0,70027816  | 0,02645 | 0,803850991 | 0,00566 | BZW1      | basic leucine zipper and W2 domains 1                  |
| 0,751580739 | 0,01705 | 0,829319546 | 0,00098 | BZW2      | basic leucine zipper and W2 domains 2                  |
| 1,368883813 | 0,01128 | 1,56049096  | 0,00019 | C10orf10  | chromosome 10 open reading frame 10                    |
| 1,721898377 | 0,00354 | 1,775222675 | 0,00001 | C10orf10  | chromosome 10 open reading frame 10                    |
| 0,478304079 | 0,04487 | 0,549427109 | 0,00076 | C10orf118 | chromosome 10 open reading frame 118                   |
| 1,509425969 | 0,00069 | 1,52308874  | 0,00003 | C10orf128 | chromosome 10 open reading frame 128                   |
| 1,356604327 | 0,04195 | 1,237132479 | 0,02159 | C10orf25  | chromosome 10 open reading frame 25                    |
| 0,830470024 | 0,03727 | 0,892546971 | 0,01183 | C10orf28  | chromosome 10 open reading frame 28                    |
| 0,624165274 | 0,00663 | 0,823591017 | 0,00029 | C10orf46  | chromosome 10 open reading frame 46                    |
| 0,5090926   | 0,00048 | 0,666187413 | 0,00104 | C10orf57  | chromosome 10 open reading frame 57                    |
| 0,646624466 | 0,00168 | 0,77916458  | 0,01155 | C10orf57  | chromosome 10 open reading frame 57                    |
| 0,401090583 | 0,01044 | 0,834509281 | 0,02353 | C10orf58  | chromosome 10 open reading frame 58                    |
| 0,53329289  | 0,00859 | 0,726482525 | 0,00026 | C10orf58  | chromosome 10 open reading frame 58                    |
| 0,718968266 | 0,00122 | 0,819036698 | 0,013   | C10orf58  | chromosome 10 open reading frame 58                    |
| 1,367935304 | 0,01666 | 1,202469249 | 0,00398 | C10orf68  | chromosome 10 open reading frame 68                    |
| 0,26999414  | 0,00489 | 0,638164384 | 0,005   | C10orf99  | chromosome 10 open reading frame 99                    |
| 0,364755086 | 0,00052 | 0,554400322 | 0,00005 | C10orf99  | chromosome 10 open reading frame 99                    |
| 1,577893682 | 0,01515 | 1,158292806 | 0,02779 | C11orf21  | chromosome 11 open reading frame 21                    |
| 1,326845141 | 0,01717 | 1,246601194 | 0,0104  | C11orf24  | chromosome 11 open reading frame 24                    |
| 0,442576882 | 0,00001 | 0,783497187 | 0,00712 | C11orf45  | chromosome 11 open reading frame 45                    |
| 0,78024548  | 0,01885 | 0,87417862  | 0,02058 | C11orf67  | chromosome 11 open reading frame 67                    |
| 0,796640096 | 0,02287 | 0,840313752 | 0,00726 | C11orf83  | chromosome 11 open reading frame 83                    |
| 1,20163605  | 0,01319 | 1,220946513 | 0,00245 | C11orf84  | chromosome 11 open reading frame 84                    |
| 1,29056249  | 0,02209 | 1,349102534 | 0,00004 | C11orf9   | chromosome 11 open reading frame 9                     |
| 0,710053679 | 0,04367 | 0,732042848 | 0,00098 | C12orf11  | chromosome 12 open reading frame 11                    |
| 1,548638056 | 0,04558 | 1,388955136 | 0,00881 | C12orf23  | chromosome 12 open reading frame 23                    |
| 0,480963727 | 0,0189  | 0,544498508 | 0       | C12orf29  | chromosome 12 open reading frame 29                    |
| 0,600818025 | 0,00639 | 0,634635443 | 0,00687 | C12orf29  | chromosome 12 open reading frame 29                    |
| 1,307671349 | 0,0388  | 1,226884977 | 0,00077 | C12orf45  | chromosome 12 open reading frame 45                    |
| 1,304954948 | 0,00269 | 1,130530567 | 0,02616 | C12orf55  | chromosome 12 open reading frame 55                    |
| 1,232852325 | 0,02807 | 1,17772279  | 0,01533 | C12orf59  | chromosome 12 open reading frame 59                    |
| 1,597703833 | 0,02216 | 1,433955248 | 0,01367 | C13orf15  | chromosome 13 open reading frame 15                    |
| 0,661127303 | 0,02081 | 0,842062954 | 0,00103 | C14orf166 | chromosome 14 open reading frame 166                   |
| 1,244874235 | 0,02794 | 1,164733586 | 0,03555 | C14orf176 | chromosome 14 open reading frame 176                   |
| 0,62676651  | 0,00698 | 0,690637224 | 0,00018 | C15orf29  | chromosome 15 open reading frame 29                    |
| 1,481439798 | 0,00335 | 1,23370717  | 0,01822 | C15orf39  | chromosome 15 open reading frame 39                    |
| 1,458009379 | 0,00308 | 1,245737416 | 0,01442 | C15orf39  | chromosome 15 open reading frame 39                    |
| 0,628071191 | 0,00793 | 0,701735863 | 0       | C15orf41  | chromosome 15 open reading frame 41                    |
| 0,51584159  | 0,00017 | 0,759962428 | 0,00868 | C15orf52  | chromosome 15 open reading frame 52                    |
| 1,581178233 | 0,00032 | 1,370782805 | 0,00335 | C15orf57  | chromosome 15 open reading frame 57                    |
| 1,279872414 | 0,01289 | 1,147902414 | 0,03616 | C16orf13  | chromosome 16 open reading frame 13                    |
| 3,877159268 | 0,00003 | 2,127265346 | 0,00178 | C16orf54  | chromosome 16 open reading frame 54                    |
| 1,353786279 | 0,00683 | 1,226884977 | 0,01412 | C16orf58  | chromosome 16 open reading frame 58                    |
| 0,730522189 | 0,00088 | 0,876605721 | 0,0423  | C16orf70  | chromosome 16 open reading frame 70                    |
| 1,421092043 | 0,01636 | 1,28877463  | 0,00068 | C16orf72  | chromosome 16 open reading frame 72                    |
| 0,695923196 | 0,0232  | 0,846745312 | 0,02413 | C16orf80  | chromosome 16 open reading frame 80                    |
| 1,314031627 | 0,02981 | 1,351910833 | 0,00105 | C16orf93  | chromosome 16 open reading frame 93                    |
| 0,685391402 | 0,00026 | 0,747424624 | 0,00666 | C17orf109 | chromosome 17 open reading frame 109                   |
| 1,601029621 | 0,00436 | 1,476314406 | 0,00112 | C17orf28  | chromosome 17 open reading frame 28                    |
| 0,624165274 | 0,01187 | 0,635956503 | 0       | C17orf39  | chromosome 17 open reading frame 39                    |
| 1,295042999 | 0,01196 | 1,150291893 | 0,02035 | C17orf51  | chromosome 17 open reading frame 51                    |
| 1,447938172 | 0,00737 | 1,417157397 | 0,00076 | C17orf62  | chromosome 17 open reading frame 62                    |
| 1,264003098 | 0,02772 | 1,161508732 | 0,01068 | C18orf1   | chromosome 18 open reading frame 1                     |
| 0,76418826  | 0,03228 | 0,756283999 | 0,00195 | C18orf10  | chromosome 18 open reading frame 10                    |
| 0,816768991 | 0,01982 | 0,788946841 | 0,00029 | C18orf10  | chromosome 18 open reading frame 10                    |
| 1,71356391  | 0,01798 | 1,607701981 | 0,00001 | C19orf10  | chromosome 19 open reading frame 10                    |
| 1,267512522 | 0,03037 | 1,384149716 | 0,00008 | C19orf23  | chromosome 19 open reading frame 23                    |
| 0,551334582 | 0,0002  | 0,720964436 | 0,00481 | C19orf33  | chromosome 19 open reading frame 33                    |
| 1,370782805 | 0,01363 | 1,180174343 | 0,00818 | C1GALT1C1 | C1GALT1-specific chaperone 1                           |
| 1,447938172 | 0,02832 | 1,242288282 | 0,01776 | C1orf105  | chromosome 1 open reading frame 105                    |
| 0,665264521 | 0,01384 | 0,835087919 | 0,0016  | C1orf106  | chromosome 1 open reading frame 106                    |
| 1,817556233 | 0,00043 | 1,527317498 | 0,00061 | C1orf115  | chromosome 1 open reading frame 115                    |
| 0,563700206 | 0,0056  | 0,680185426 | 0,00001 | C1orf116  | chromosome 1 open reading frame 116                    |
| 0,730016005 | 0,02186 | 0,807201075 | 0,03127 | C1orf116  | chromosome 1 open reading frame 116                    |
| 0,664342907 | 0,02716 | 0,716480825 | 0,00051 | C1orf131  | chromosome 1 open reading frame 131                    |
| 0,749499801 | 0,00963 | 0,877821798 | 0,01191 | C1orf151  | chromosome 1 open reading frame 151                    |
| 1,431968741 | 0,01804 | 1,441928871 | 0,00193 | C1orf162  | chromosome 1 open reading frame 162                    |
| 0,718470088 | 0,00278 | 0,823591017 | 0,0037  | C1orf172  | chromosome 1 open reading frame 172                    |
| 0,667574152 | 0,01086 | 0,767373048 | 0,00107 | C1orf21   | chromosome 1 open reading frame 21                     |
| 0,70514898  | 0,02115 | 0,775393206 | 0,02316 | C1orf210  | chromosome 1 open reading frame 210                    |
| 0,784584098 | 0,04179 | 0,784040454 | 0,00529 | C1orf27   | chromosome 1 open reading frame 27                     |
| 0,821880187 | 0,03309 | 0,780786493 | 0,00014 | C1orf31   | chromosome 1 open reading frame 31                     |
| 2,170458744 | 0,00181 | 2,331082396 | 0       | C1orf38   | chromosome 1 open reading frame 38                     |
| 2,295804828 | 0,00278 | 2,505328877 | 0       | C1orf38   | chromosome 1 open reading frame 38                     |
| 0,672217497 | 0,00157 | 0,768437591 | 0,00329 | C1orf43   | chromosome 1 open reading frame 43                     |
| 0,667111585 | 0,00111 | 0,750019495 | 0,00033 | C1orf52   | chromosome 1 open reading frame 52                     |
| 1,361314116 | 0,00744 | 1,269270886 | 0,00569 | C1orf54   | chromosome 1 open reading frame 54                     |
| 1,281647924 | 0,00894 | 1,2397077   | 0,00257 | C1orf61   | chromosome 1 open reading frame 61                     |
| 1,333298677 | 0,01292 | 1,280759861 | 0,00054 | C1orf94   | chromosome 1 open reading frame 94                     |
| 0,844400887 | 0,0397  | 0,742261785 | 0,00034 | C1QBP     | complement component 1, q subcomponent binding protein |
| 1,905275996 | 0,00055 | 1,70054832  | 0,00023 | C1QC      | complement component 1, q subcomponent, C chain        |
| 1,313121125 | 0,04396 | 1,309485423 | 0,00362 | C1QTNF1   | C1q and tumor necrosis factor related protein 1        |
| 1,378405153 | 0,02578 | 1,284315809 | 0,00249 | C20orf103 | chromosome 20 open reading frame 103                   |
| 0,65747138  | 0,00026 | 0,728499557 | 0,00477 | C20orf11  | chromosome 20 open reading frame 11                    |
| 0,794985251 | 0,04318 | 0,790041312 | 0,00041 | C20orf11  | chromosome 20 open reading frame 11                    |
| 1,59549048  | 0,00058 | 1,372684431 | 0,00196 | C20orf112 | chromosome 20 open reading frame 112                   |

|             |         |             |         |           |                                                                   |
|-------------|---------|-------------|---------|-----------|-------------------------------------------------------------------|
| 1,422077411 | 0,0024  | 1,307671349 | 0,00441 | C20orf160 | chromosome 20 open reading frame 160                              |
| 1,301341855 | 0,01968 | 1,17772279  | 0,01839 | C20orf30  | chromosome 20 open reading frame 30                               |
| 0,806641759 | 0,02314 | 0,872362706 | 0,01817 | C20orf7   | chromosome 20 open reading frame 7                                |
| 0,597495602 | 0,00558 | 0,807201075 | 0,00711 | C20orf72  | chromosome 20 open reading frame 72                               |
| 0,69495911  | 0,03292 | 0,752623374 | 0,00153 | C20orf94  | chromosome 20 open reading frame 94                               |
| 1,917198877 | 0,0101  | 2,139094176 | 0       | C21orf96  | chromosome 21 open reading frame 96                               |
| 0,730522189 | 0,00424 | 0,819604608 | 0,00037 | C22orf28  | chromosome 22 open reading frame 28                               |
| 1,247465572 | 0,04352 | 1,204137381 | 0,01483 | C22orf37  | chromosome 22 open reading frame 37                               |
| 1,204972315 | 0,02584 | 1,300440147 | 0,00064 | C22orf40  | chromosome 22 open reading frame 40                               |
| 1,293248932 | 0,01279 | 1,147107024 | 0,00896 | C22orf46  | chromosome 22 open reading frame 46                               |
| 1,189207115 | 0,0373  | 1,159899655 | 0,02272 | C2orf19   | chromosome 2 open reading frame 19                                |
| 0,755236293 | 0,04229 | 0,863938187 | 0,03703 | C2orf49   | chromosome 2 open reading frame 49                                |
| 0,576343173 | 0,00357 | 0,704172113 | 0,00035 | C2orf55   | chromosome 2 open reading frame 55                                |
| 0,737645729 | 0,02986 | 0,883927531 | 0,03795 | C2orf68   | chromosome 2 open reading frame 68                                |
| 1,52414483  | 0,00129 | 1,478362431 | 0,00016 | C2orf88   | chromosome 2 open reading frame 88                                |
| 1,581178233 | 0,00187 | 1,186736798 | 0,02823 | C2orf88   | chromosome 2 open reading frame 88                                |
| 1,225185332 | 0,02515 | 1,186736798 | 0,00592 | C2orf89   | chromosome 2 open reading frame 89                                |
| 2,07915887  | 0,00243 | 2,105262309 | 0       | C3        | complement component 3                                            |
| 1,423063461 | 0,00531 | 1,270150983 | 0,00393 | C3AR1     | complement component 3a receptor 1                                |
| 0,56097174  | 0,00091 | 0,557869661 | 0,00001 | C3orf14   | chromosome 3 open reading frame 14                                |
| 0,70759708  | 0,01541 | 0,806082831 | 0,00018 | C3orf19   | chromosome 3 open reading frame 19                                |
| 0,651122095 | 0,00331 | 0,691595315 | 0,00103 | C3orf23   | chromosome 3 open reading frame 23                                |
| 1,276328769 | 0,02265 | 1,271031689 | 0,00416 | C3orf45   | chromosome 3 open reading frame 45                                |
| 1,650610817 | 0,03881 | 1,366040257 | 0,03695 | C3orf70   | chromosome 3 open reading frame 70                                |
| 0,545253866 | 0,01283 | 0,755236293 | 0,03114 | C4orf3    | chromosome 4 open reading frame 3                                 |
| 0,679243142 | 0,02847 | 0,754712984 | 0,03218 | C4orf34   | chromosome 4 open reading frame 34                                |
| 1,230291345 | 0,02641 | 1,155886707 | 0,00159 | C4orf39   | chromosome 4 open reading frame 39                                |
| 1,356604327 | 0,0024  | 1,235418637 | 0,00381 | C4orf42   | chromosome 4 open reading frame 42                                |
| 1,742308384 | 0,00058 | 1,684125907 | 0       | C4orf48   | chromosome 4 open reading frame 48                                |
| 1,972465409 | 0,00037 | 1,929196369 | 0,00006 | C5AR1     | complement component 5a receptor 1                                |
| 0,534773544 | 0,04046 | 0,61301743  | 0,00206 | C5orf24   | chromosome 5 open reading frame 24                                |
| 0,655196702 | 0,0375  | 0,76630998  | 0,0028  | C5orf28   | chromosome 5 open reading frame 28                                |
| 1,510472586 | 0,01377 | 1,526259209 | 0,00007 | C5orf4    | chromosome 5 open reading frame 4                                 |
| 1,356604327 | 0,00871 | 1,237990291 | 0,006   | C5orf4    | chromosome 5 open reading frame 4                                 |
| 1,53049677  | 0,00369 | 1,182631    | 0,00911 | C5orf56   | chromosome 5 open reading frame 56                                |
| 1,503161478 | 0,00058 | 1,481439798 | 0,00003 | C5orf56   | chromosome 5 open reading frame 56                                |
| 1,295042999 | 0,02477 | 1,278099363 | 0,0002  | C5orf56   | chromosome 5 open reading frame 56                                |
| 0,594603558 | 0,00231 | 0,862741345 | 0,0211  | C6orf1    | chromosome 6 open reading frame 1                                 |
| 0,6341957   | 0,00704 | 0,625031151 | 0,00003 | C6orf124  | chromosome 6 open reading frame 124                               |
| 0,356012549 | 0,00007 | 0,480297432 | 0,00014 | C6orf132  | chromosome 6 open reading frame 132                               |
| 0,636397468 | 0,00338 | 0,738669032 | 0,0018  | C6orf141  | chromosome 6 open reading frame 141                               |
| 0,685866644 | 0,00166 | 0,82894586  | 0,04734 | C6orf170  | chromosome 6 open reading frame 170                               |
| 0,647521499 | 0,00757 | 0,754190038 | 0,00045 | C6orf203  | chromosome 6 open reading frame 203                               |
| 1,986184991 | 0,00729 | 1,295042999 | 0,01202 | C6orf204  | chromosome 6 open reading frame 204                               |
| 0,615145672 | 0,00329 | 0,821880187 | 0,03457 | C7orf41   | chromosome 7 open reading frame 41                                |
| 1,219255094 | 0,01573 | 1,186736798 | 0,00592 | C7orf43   | chromosome 7 open reading frame 43                                |
| 0,790589117 | 0,03102 | 0,882702996 | 0,00657 | C7orf44   | chromosome 7 open reading frame 44                                |
| 1,504203751 | 0,00755 | 1,292352831 | 0,00019 | C7orf54   | chromosome 7 open reading frame 54                                |
| 0,718470088 | 0,04701 | 0,789493887 | 0,00037 | C7orf64   | chromosome 7 open reading frame 64                                |
| 1,754427097 | 0,00014 | 1,375541818 | 0,0007  | C7orf74   | chromosome 7 open reading frame 74                                |
| 1,839100092 | 0,0161  | 1,388955136 | 0,01213 | C8orf4    | chromosome 8 open reading frame 4                                 |
| 0,791137301 | 0,02382 | 0,770571108 | 0,00188 | C8orf40   | chromosome 8 open reading frame 40                                |
| 0,697371833 | 0,01102 | 0,762600827 | 0,00002 | C9orf125  | chromosome 9 open reading frame 125                               |
| 0,722465199 | 0,00073 | 0,717474767 | 0,00016 | C9orf125  | chromosome 9 open reading frame 125                               |
| 1,463071221 | 0,00283 | 1,43097652  | 0,00595 | C9orf150  | chromosome 9 open reading frame 150                               |
| 0,70514898  | 0,00364 | 0,727994774 | 0,0101  | C9orf169  | chromosome 9 open reading frame 169                               |
| 0,554400322 | 0,00006 | 0,757858283 | 0,00162 | C9orf3    | chromosome 9 open reading frame 3                                 |
| 0,554400322 | 0,0003  | 0,673616788 | 0,00001 | C9orf3    | chromosome 9 open reading frame 3                                 |
| 0,709561678 | 0,01921 | 0,790589117 | 0,00831 | C9orf85   | chromosome 9 open reading frame 85                                |
| 0,729510172 | 0,00796 | 0,847919965 | 0,03685 | C9orf9    | chromosome 9 open reading frame 9                                 |
| 0,806641759 | 0,01518 | 0,842062954 | 0,00507 | C9orf9    | chromosome 9 open reading frame 9                                 |
| 0,514056913 | 0,00105 | 0,697855382 | 0,00021 | CA12      | carbonic anhydrase XII                                            |
| 0,454074209 | 0,00525 | 0,625031151 | 0,00014 | CA12      | carbonic anhydrase XII                                            |
| 0,455966583 | 0,00768 | 0,686818117 | 0,00213 | CA12      | carbonic anhydrase XII                                            |
| 0,536630143 | 0,00101 | 0,682546859 | 0,00008 | CA12      | carbonic anhydrase XII                                            |
| 0,541862983 | 0,00083 | 0,692554734 | 0,00014 | CA12      | carbonic anhydrase XII                                            |
| 0,534773544 | 0,02391 | 0,721964598 | 0,00029 | CA5BP1    | carbonic anhydrase VB pseudogene 1                                |
| 0,716480825 | 0,04867 | 0,837987135 | 0,00464 | CAB39     | calcium binding protein 39                                        |
| 1,294145654 | 0,01645 | 1,256142381 | 0,00078 | CABP4     | calcium binding protein 4                                         |
| 1,215879283 | 0,04423 | 1,325007017 | 0,00002 | CABP4     | calcium binding protein 4                                         |
| 1,353786279 | 0,01083 | 1,187559666 | 0,0113  | CACNA2D4  | calcium channel, voltage-dependent, alpha 2/delta subunit 4       |
| 0,731028724 | 0,01499 | 0,682546859 | 0,00002 | CACYBP    | calyculin binding protein                                         |
| 1,194991205 | 0,0306  | 1,25353302  | 0,00035 | CADM3     | cell adhesion molecule 3                                          |
| 1,630144665 | 0,02635 | 1,285206337 | 0,01316 | CADPS2    | Ca++-dependent secretion activator 2                              |
| 1,308578071 | 0,0181  | 1,265756594 | 0,0029  | CALB2     | calbindin 2                                                       |
| 0,805524291 | 0,04409 | 0,840896415 | 0,00281 | CALCOCO2  | calcium binding and coiled-coil domain 2                          |
| 1,365093718 | 0,01904 | 1,349102534 | 0,00114 | CALHM2    | calcium homeostasis modulator 2                                   |
| 1,337000495 | 0,02161 | 1,298638603 | 0,00234 | CALHM2    | calcium homeostasis modulator 2                                   |
| 0,661127303 | 0,03572 | 0,794985251 | 0,00282 | CALM1     | calmodulin 1 (phosphorylase kinase, delta)                        |
| 0,240315232 | 0,00206 | 0,582770599 | 0,01937 | CALML5    | calmodulin-like 5                                                 |
| 0,622868708 | 0,01407 | 0,840313752 | 0,03592 | CALR      | calreticulin                                                      |
| 0,585605091 | 0,02757 | 0,599569957 | 0,00002 | CAMK1D    | calcium/calmodulin-dependent protein kinase 1D                    |
| 0,731028724 | 0,00581 | 0,880259014 | 0,02633 | CAMKK1    | calcium/calmodulin-dependent protein kinase kinase 1, alpha       |
| 0,697855382 | 0,04671 | 0,738669032 | 0,00095 | CAMSAP1   | calmodulin regulated spectrin-associated protein 1                |
| 0,677362489 | 0,02075 | 0,697371833 | 0,00235 | CAMSAP1   | calmodulin regulated spectrin-associated protein 1                |
| 0,637280314 | 0,00284 | 0,763129604 | 0,00016 | CAMSAP1   | calmodulin regulated spectrin-associated protein 1                |
| 0,553248677 | 0,00089 | 0,630251696 | 0,00001 | CAMSAP1   | calmodulin regulated spectrin-associated protein 1                |
| 0,585605091 | 0,04481 | 0,6341957   | 0,00424 | CAMSAP2   | calmodulin regulated spectrin-associated protein family, member 2 |
| 0,691595315 | 0,02119 | 0,819604608 | 0,01518 | CAND1     | cullin-associated and neddylation-dissociated 1                   |
| 1,53368266  | 0,00155 | 1,178539408 | 0,03313 | CAPN5     | calpain 5                                                         |
| 0,341273429 | 0,00002 | 0,581963267 | 0,00004 | CAPNS2    | calpain, small subunit 2                                          |
| 0,771105413 | 0,04443 | 0,840313752 | 0,0095  | CAPRN1    | cell cycle associated protein 1                                   |
| 0,718470088 | 0,00559 | 0,70759708  | 0,00014 | CARD10    | caspase recruitment domain family, member 10                      |
| 0,785672517 | 0,02547 | 0,839731493 | 0,01074 | CARD14    | caspase recruitment domain family, member 14                      |
| 1,89736863  | 0,0101  | 1,592176198 | 0,00012 | CARD8     | caspase recruitment domain family, member 8                       |
| 1,630144665 | 0,00283 | 1,275444392 | 0,00145 | CARD8     | caspase recruitment domain family, member 8                       |
| 1,387030969 | 0,00554 | 1,167158102 | 0,00786 | CARD8     | caspase recruitment domain family, member 8                       |
| 1,858321349 | 0,00035 | 1,729074463 | 0       | CASP10    | caspase 10, apoptosis-related cysteine peptidase                  |

|             |         |             |         |          |                                                                       |
|-------------|---------|-------------|---------|----------|-----------------------------------------------------------------------|
| 1,29056249  | 0,03199 | 1,355664327 | 0,00089 | CASP10   | caspase 10, apoptosis-related cysteine peptidase                      |
| 1,545421099 | 0,01039 | 1,17772279  | 0,0187  | CASP3    | caspase 3, apoptosis-related cysteine peptidase                       |
| 0,663882579 | 0,01498 | 0,806082831 | 0,01185 | CASP4    | caspase 4, apoptosis-related cysteine peptidase                       |
| 0,682073917 | 0,01487 | 0,844400887 | 0,00575 | CAST     | calpastatin                                                           |
| 0,547905883 | 0,04928 | 0,863938187 | 0,02878 | CAST     | calpastatin                                                           |
| 0,673150035 | 0,03253 | 0,727994774 | 0,00253 | CAST     | calpastatin                                                           |
| 0,500346694 | 0,01126 | 0,540362701 | 0,00071 | CASZ1    | castor zinc finger 1                                                  |
| 0,597081594 | 0,01156 | 0,694477568 | 0,00491 | CAV2     | caveolin 2                                                            |
| 1,563739286 | 0,01292 | 1,445932295 | 0,00007 | CBFA2T3  | core-binding factor, runt domain, alpha subunit 2; translocated to, 3 |
| 0,673150035 | 0,0137  | 0,723969086 | 0,00071 | CBLL1    | Cas-Br-M (murine) ecotropic retroviral transforming sequence-like 1   |
| 1,303147149 | 0,04053 | 1,151887642 | 0,04864 | CBLN3    | cerebellin 3 precursor                                                |
| 0,469435874 | 0,00027 | 0,607939642 | 0,00001 | CBR3     | carbonyl reductase 3                                                  |
| 0,60667678  | 0,00813 | 0,756808396 | 0,00051 | CBX1     | chromobox homolog 1                                                   |
| 0,750539549 | 0,00933 | 0,717972255 | 0,00007 | CBX5     | chromobox homolog 5                                                   |
| 1,4054187   | 0,03639 | 1,346300069 | 0,00133 | CBX7     | chromobox homolog 7                                                   |
| 0,776468875 | 0,02718 | 0,708087719 | 0       | CCDC120  | coiled-coil domain containing 120                                     |
| 0,714992493 | 0,00068 | 0,885153765 | 0,01616 | CCDC150  | coiled-coil domain containing 150                                     |
| 1,841651394 | 0,00003 | 1,376495602 | 0,0006  | CCDC163P | coiled-coil domain containing 163, pseudogene                         |
| 0,553248677 | 0,0093  | 0,628071191 | 0,00055 | CCDC165  | coiled-coil domain containing 165                                     |
| 1,261377409 | 0,01827 | 1,125058485 | 0,03597 | CCDC17   | coiled-coil domain containing 17                                      |
| 1,244011653 | 0,02768 | 1,175276328 | 0,00263 | CCDC40   | coiled-coil domain containing 40                                      |
| 0,636397468 | 0,0449  | 0,746906729 | 0,00793 | CCDC47   | coiled-coil domain containing 47                                      |
| 0,608361179 | 0,02771 | 0,848507902 | 0,00212 | CCDC53   | coiled-coil domain containing 53                                      |
| 1,221793102 | 0,03844 | 1,159095952 | 0,00564 | CCDC57   | coiled-coil domain containing 57                                      |
| 0,733058379 | 0,01535 | 0,730016005 | 0,00073 | CCDC58   | coiled-coil domain containing 58                                      |
| 0,759962428 | 0,03458 | 0,798851916 | 0,00025 | CCDC59   | coiled-coil domain containing 59                                      |
| 0,718968266 | 0,0476  | 0,860949188 | 0,0173  | CCDC6    | coiled-coil domain containing 6                                       |
| 0,658383461 | 0,02946 | 0,838568184 | 0,04886 | CCDC64B  | coiled-coil domain containing 64B                                     |
| 2,0139111   | 0,02137 | 1,770307529 | 0,00003 | CCDC69   | coiled-coil domain containing 69                                      |
| 2,005552872 | 0,00001 | 1,558329159 | 0,00084 | CCDC69   | coiled-coil domain containing 69                                      |
| 0,777546036 | 0,01378 | 0,808320869 | 0,00066 | CCDC72   | coiled-coil domain containing 72                                      |
| 0,593368399 | 0,03358 | 0,743806881 | 0,00003 | CCDC85C  | coiled-coil domain containing 85C                                     |
| 1,684125907 | 0,00448 | 1,371733289 | 0,0105  | CCDC88A  | coiled-coil domain containing 88A                                     |
| 1,250062303 | 0,0119  | 1,387992719 | 0,00028 | CCDC88A  | coiled-coil domain containing 88A                                     |
| 1,378405153 | 0,00946 | 1,17609125  | 0,01136 | CCDC88A  | coiled-coil domain containing 88A                                     |
| 0,666649339 | 0,00187 | 0,723969086 | 0,00003 | CCDC90A  | coiled-coil domain containing 90A                                     |
| 0,5913155   | 0,01727 | 0,596667872 | 0,00104 | CCDC90A  | coiled-coil domain containing 90A                                     |
| 1,337000495 | 0,00596 | 1,175276328 | 0,01482 | CCL13    | chemokine (C-C motif) ligand 13                                       |
| 2,099433367 | 0,00006 | 2,403272099 | 0,00002 | CCL18    | chemokine (C-C motif) ligand 18 (pulmonary and activation-regulated)  |
| 2,050534476 | 0       | 2,234574276 | 0,0002  | CCL18    | chemokine (C-C motif) ligand 18 (pulmonary and activation-regulated)  |
| 1,32317144  | 0,02841 | 1,285206337 | 0,00401 | CCL22    | chemokine (C-C motif) ligand 22                                       |
| 1,187559666 | 0,04931 | 1,171210181 | 0,00431 | CCL23    | chemokine (C-C motif) ligand 23                                       |
| 1,203303026 | 0,02571 | 1,181811547 | 0,01955 | CCL25    | chemokine (C-C motif) ligand 25                                       |
| 1,591072968 | 0,00084 | 1,244874235 | 0,04982 | CCL4     | chemokine (C-C motif) ligand 4                                        |
| 2,273633946 | 0,00219 | 1,522033381 | 0,01481 | CCL5     | chemokine (C-C motif) ligand 5                                        |
| 1,776453592 | 0,00631 | 1,500038989 | 0,00103 | CCL5     | chemokine (C-C motif) ligand 5                                        |
| 1,778917987 | 0,00456 | 1,423063461 | 0,03138 | CCL5     | chemokine (C-C motif) ligand 5                                        |
| 1,624504793 | 0,00522 | 1,407368375 | 0,00016 | CCM2     | cerebral cavernous malformation 2                                     |
| 0,807760778 | 0,04099 | 0,875998315 | 0,02207 | CCNB2    | cyclin B2                                                             |
| 0,627635996 | 0,02797 | 0,652477474 | 0,0001  | CCND1    | cyclin D1                                                             |
| 0,598324482 | 0,00683 | 0,557869661 | 0,00022 | CCNT2    | cyclin T2                                                             |
| 1,747145792 | 0,00265 | 1,582274602 | 0,00067 | CCPG1    | cell cycle progression 1                                              |
| 1,831467373 | 0,00273 | 1,474269217 | 0,01494 | CCPG1    | cell cycle progression 1                                              |
| 1,925188886 | 0,00139 | 1,55293775  | 0,00008 | CCR1     | chemokine (C-C motif) receptor 1                                      |
| 1,512567997 | 0,00081 | 1,487613762 | 0,00142 | CCR1     | chemokine (C-C motif) receptor 1                                      |
| 1,52414483  | 0,00852 | 1,270150983 | 0,01009 | CCR10    | chemokine (C-C motif) receptor 10                                     |
| 1,879045498 | 0,00015 | 1,460032011 | 0,00339 | CCR2     | chemokine (C-C motif) receptor 2                                      |
| 2,011121161 | 0,00012 | 1,477338064 | 0,01905 | CCR7     | chemokine (C-C motif) receptor 7                                      |
| 1,391846392 | 0,00191 | 1,172834949 | 0,0082  | CCRL2    | chemokine (C-C motif) receptor-like 2                                 |
| 0,734075318 | 0,00953 | 0,736113431 | 0,00017 | CCT2     | chaperonin containing TCP1, subunit 2 (beta)                          |
| 0,767373048 | 0,01318 | 0,879649076 | 0,00938 | CCT4     | chaperonin containing TCP1, subunit 4 (delta)                         |
| 0,607939642 | 0,02006 | 0,672217497 | 0       | CCT6A    | chaperonin containing TCP1, subunit 6A (zeta 1)                       |
| 0,664803554 | 0,00808 | 0,77546036  | 0,00006 | CCT6A    | chaperonin containing TCP1, subunit 6A (zeta 1)                       |
| 0,758383773 | 0,00275 | 0,807760778 | 0,0031  | CCT6B    | chaperonin containing TCP1, subunit 6B (zeta 2)                       |
| 0,689202576 | 0,04549 | 0,892546971 | 0,01504 | CCT8     | chaperonin containing TCP1, subunit 8 (theta)                         |
| 1,983433461 | 0,0023  | 1,686462221 | 0,00212 | CD163    | CD163 molecule                                                        |
| 2,196185628 | 0,00047 | 1,542210825 | 0,00588 | CD163    | CD163 molecule                                                        |
| 1,681792831 | 0,00179 | 1,854461093 | 0,00001 | CD180    | CD180 molecule                                                        |
| 2,208397694 | 0,00013 | 2,223758315 | 0       | CD19     | CD19 molecule                                                         |
| 0,5913155   | 0,00009 | 0,832198735 | 0,02274 | CD1A     | CD1a molecule                                                         |
| 1,710004356 | 0,00114 | 1,479387509 | 0,00542 | CD2      | CD2 molecule                                                          |
| 1,710004356 | 0,00016 | 1,587767862 | 0,00017 | CD200    | CD200 molecule                                                        |
| 1,921189728 | 0,00127 | 1,537940831 | 0,00063 | CD200    | CD200 molecule                                                        |
| 1,248330549 | 0,01952 | 1,144724161 | 0,00501 | CD200R1  | CD200 receptor 1                                                      |
| 0,489710149 | 0,00016 | 0,749499801 | 0,00113 | CD207    | CD207 molecule, langerin                                              |
| 1,501079098 | 0,03765 | 1,409320755 | 0,00001 | CD209    | CD209 molecule                                                        |
| 1,343503426 | 0,01493 | 1,185914499 | 0,01615 | CD22     | CD22 molecule                                                         |
| 1,244874235 | 0,02715 | 1,249196126 | 0,00085 | CD22     | CD22 molecule                                                         |
| 0,581963267 | 0,00276 | 0,782411782 | 0,01159 | CD24     | CD24 molecule                                                         |
| 0,784584098 | 0,03593 | 0,879649076 | 0,01891 | CD24     | CD24 molecule                                                         |
| 0,467487599 | 0,02114 | 0,753145233 | 0,03991 | CD24     | CD24 molecule                                                         |
| 1,70054832  | 0,00006 | 1,413233644 | 0,00036 | CD247    | CD247 molecule                                                        |
| 2,857988279 | 0,00002 | 3,47737824  | 0       | CD27     | CD27 molecule                                                         |
| 1,53261996  | 0,00225 | 1,304954948 | 0,00339 | CD28     | CD28 molecule                                                         |
| 1,717130873 | 0,00135 | 1,435944511 | 0,00016 | CD300A   | CD300a molecule                                                       |
| 1,537940831 | 0,00039 | 1,601029621 | 0,00003 | CD300LF  | CD300 molecule-like family member f                                   |
| 1,371733289 | 0,00901 | 1,256142381 | 0,00203 | CD33     | CD33 molecule                                                         |
| 0,363745171 | 0,00529 | 0,688725023 | 0,04373 | CD36     | CD36 molecule (thrombospondin receptor)                               |
| 0,403880389 | 0,02025 | 0,713507253 | 0,0475  | CD36     | CD36 molecule (thrombospondin receptor)                               |
| 0,404160434 | 0,0145  | 0,655196702 | 0,006   | CD36     | CD36 molecule (thrombospondin receptor)                               |
| 0,547905883 | 0,00152 | 0,716480825 | 0,00066 | CD36     | CD36 molecule (thrombospondin receptor)                               |
| 1,631274987 | 0,04335 | 1,793776319 | 0,00021 | CD37     | CD37 molecule                                                         |
| 3,171136546 | 0,00004 | 2,573978495 | 0       | CD38     | CD38 molecule                                                         |
| 1,52308874  | 0,00329 | 1,481439798 | 0,00114 | CD3D     | CD3d molecule, delta (CD3-TCR complex)                                |
| 1,480413298 | 0,00953 | 1,53900722  | 0,00003 | CD3E     | CD3e molecule, epsilon (CD3-TCR complex)                              |
| 1,304954948 | 0,01212 | 1,21167266  | 0,01856 | CD3G     | CD3g molecule, gamma (CD3-TCR complex)                                |
| 1,480413298 | 0,0177  | 1,465100875 | 0,00006 | CD4      | CD4 molecule                                                          |
| 1,461044379 | 0,04908 | 1,479387509 | 0       | CD40     | CD40 molecule, TNF receptor superfamily member 5                      |

|             |         |              |         |          |                                                                                  |
|-------------|---------|--------------|---------|----------|----------------------------------------------------------------------------------|
| 0,76950361  | 0,04187 | 0,863938187  | 0,03524 | CD44     | CD44 molecule (Indian blood group)                                               |
| 0,649319301 | 0,00178 | 0,778624691  | 0,00137 | CD44     | CD44 molecule (Indian blood group)                                               |
| 2,046274939 | 0,00028 | 1,647182035  | 0,0008  | CD48     | CD48 molecule                                                                    |
| 1,477338064 | 0,00238 | 1,2388848698 | 0,00605 | CD5      | CD5 molecule                                                                     |
| 1,50733491  | 0,03944 | 1,489677463  | 0,02459 | CD52     | CD52 molecule                                                                    |
| 2,250116969 | 0       | 1,905275996  | 0,00002 | CD53     | CD53 molecule                                                                    |
| 1,497960934 | 0,00091 | 1,383190629  | 0,04518 | CD53     | CD53 molecule                                                                    |
| 0,579949827 | 0,00017 | 0,804408371  | 0,02236 | CD55     | CD55 molecule, decay accelerating factor for complement (Cromer blood group)     |
| 0,580754366 | 0,00034 | 0,780786493  | 0,01679 | CD55     | CD55 molecule, decay accelerating factor for complement (Cromer blood group)     |
| 1,275444392 | 0,02193 | 1,244011653  | 0,02173 | CD6      | CD6 molecule                                                                     |
| 1,413233644 | 0,00593 | 1,284315809  | 0,0008  | CD6      | CD6 molecule                                                                     |
| 4,141059695 | 0,00079 | 1,822602561  | 0,01719 | CD69     | CD69 molecule                                                                    |
| 1,297738767 | 0,01711 | 1,196648963  | 0,01698 | CD72     | CD72 molecule                                                                    |
| 3,680750602 | 0,00026 | 3,427127819  | 0       | CD79A    | CD79a molecule, immunoglobulin-associated alpha                                  |
| 3,739900791 | 0,00001 | 3,729545946  | 0       | CD79A    | CD79a molecule, immunoglobulin-associated alpha                                  |
| 1,840375301 | 0,00293 | 1,675974269  | 0,00001 | CD79B    | CD79b molecule, immunoglobulin-associated beta                                   |
| 1,837825767 | 0,0008  | 1,387992719  | 0,00537 | CD84     | CD84 molecule                                                                    |
| 1,377450046 | 0,02162 | 1,174461971  | 0,01449 | CD86     | CD86 molecule                                                                    |
| 1,486582984 | 0,02618 | 1,32408891   | 0,01541 | CD8A     | CD8a molecule                                                                    |
| 1,589970502 | 0,04699 | 1,497960934  | 0,00007 | CD93     | CD93 molecule                                                                    |
| 2,095072254 | 0,0013  | 1,689972769  | 0,00004 | CD93     | CD93 molecule                                                                    |
| 1,609932275 | 0,0234  | 1,509425969  | 0,00024 | CD97     | CD97 molecule                                                                    |
| 1,38991822  | 0,03327 | 1,395710764  | 0,0001  | CD99L2   | CD99 molecule-like 2                                                             |
| 0,799960128 | 0,0171  | 0,771640088  | 0,00048 | CDADC1   | cytidine and dCMP deaminase domain containing 1                                  |
| 0,552482242 | 0,0276  | 0,826450318  | 0,00091 | CDC123   | cell division cycle 123 homolog (S. cerevisiae)                                  |
| 0,71946679  | 0,01301 | 0,722966147  | 0,00005 | CDC42    | cell division cycle 42 (GTP binding protein, 25kDa)                              |
| 1,269270886 | 0,01868 | 1,197478705  | 0,01063 | CDC42EP2 | CDC42 effector protein (Rho GTPase binding) 2                                    |
| 1,462057448 | 0,00363 | 1,317679952  | 0,01271 | CDC42EP3 | CDC42 effector protein (Rho GTPase binding) 3                                    |
| 1,781385801 | 0,01504 | 1,399585866  | 0,00497 | CDC42EP3 | CDC42 effector protein (Rho GTPase binding) 3                                    |
| 1,536875181 | 0,03601 | 1,36983298   | 0,01397 | CDC42EP3 | CDC42 effector protein (Rho GTPase binding) 3                                    |
| 1,317679952 | 0,04246 | 1,271031689  | 0,00596 | CDC42EP5 | CDC42 effector protein (Rho GTPase binding) 5                                    |
| 0,53998828  | 0,02451 | 0,607097442  | 0,00015 | CDCA7    | cell division cycle associated 7                                                 |
| 0,607097442 | 0,00399 | 0,68770909   | 0,00016 | CDCA7L   | cell division cycle associated 7-like                                            |
| 0,655196702 | 0,00579 | 0,729510172  | 0,00001 | CDH1     | cadherin 1, type 1, E-cadherin (epithelial)                                      |
| 0,694477568 | 0,02633 | 0,72597914   | 0,00163 | CDH13    | cadherin 13, H-cadherin (heart)                                                  |
| 1,258757174 | 0,04251 | 1,149494848  | 0,03096 | CDH17    | cadherin 17, LI cadherin (liver-intestine)                                       |
| 1,227735684 | 0,01799 | 1,163120042  | 0,0046  | CDH18    | cadherin 18, type 2                                                              |
| 1,614402149 | 0,00634 | 1,493813457  | 0,00086 | CDH5     | cadherin 5, type 2 (vascular endothelium)                                        |
| 1,431968741 | 0,02024 | 1,333298677  | 0,00139 | CDH6     | cadherin 6, type 2, K-cadherin (fetal kidney)                                    |
| 0,409802304 | 0,0009  | 0,672217497  | 0,00226 | CDHR1    | cadherin-related family member 1                                                 |
| 0,78024548  | 0,00939 | 0,809442217  | 0,0001  | CDK12    | cyclin-dependent kinase 12                                                       |
| 0,70514898  | 0,04653 | 0,748461493  | 0,0121  | CDK13    | cyclin-dependent kinase 13                                                       |
| 2,15995312  | 0,00182 | 1,808758755  | 0,00025 | CDK14    | cyclin-dependent kinase 14                                                       |
| 1,255271991 | 0,0192  | 1,163120042  | 0,01497 | CDK14    | cyclin-dependent kinase 14                                                       |
| 0,549808075 | 0,00887 | 0,756283999  | 0,00034 | CDK19    | cyclin-dependent kinase 19                                                       |
| 0,635956503 | 0,01385 | 0,801069878  | 0,02497 | CDK7     | cyclin-dependent kinase 7                                                        |
| 1,196648963 | 0,04641 | 1,194163187  | 0,00939 | CDKL3    | cyclin-dependent kinase-like 3                                                   |
| 1,459020344 | 0,0207  | 1,271031689  | 0,02549 | CDR2     | cerebellar degeneration-related protein 2, 62kDa                                 |
| 0,469761375 | 0,00592 | 0,668037039  | 0,00003 | CDS1     | CDP-diacylglycerol synthase (phosphatidate cytidylyltransferase) 1               |
| 0,635956503 | 0,00691 | 0,788946841  | 0,00209 | CDS1     | CDP-diacylglycerol synthase (phosphatidate cytidylyltransferase) 1               |
| 0,315344352 | 0,00006 | 0,597081594  | 0,02479 | CDSN     | corneodesmosin                                                                   |
| 1,901318202 | 0,02735 | 1,484523571  | 0,0169  | CEACAM1  | carcinoembryonic antigen-related cell adhesion molecule 1 (biliary glycoprotein) |
| 1,52414483  | 0,00594 | 1,250062303  | 0,00079 | CEACAM21 | carcinoembryonic antigen-related cell adhesion molecule 21                       |
| 1,319507911 | 0,00455 | 1,163926534  | 0,00648 | CEACAM21 | carcinoembryonic antigen-related cell adhesion molecule 21                       |
| 0,517273791 | 0,00005 | 0,628506687  | 0       | CEBPG    | CCAAT/enhancer binding protein (C/EBP), gamma                                    |
| 0,527776859 | 0,00404 | 0,630688704  | 0       | CEBPG    | CCAAT/enhancer binding protein (C/EBP), gamma                                    |
| 2,774061938 | 0,00025 | 2,816688454  | 0       | CECR1    | cat eye syndrome chromosome region, candidate 1                                  |
| 1,21925094  | 0,02096 | 1,152686347  | 0,04634 | CECR6    | cat eye syndrome chromosome region, candidate 6                                  |
| 0,673616788 | 0,01498 | 0,753145233  | 0,00015 | CELSR1   | cadherin, EGF LAG seven-pass G-type receptor 1 (flamingo homolog, Drosophila)    |
| 0,534773544 | 0,01224 | 0,76630998   | 0,00006 | CELSR2   | cadherin, EGF LAG seven-pass G-type receptor 2 (flamingo homolog, Drosophila)    |
| 0,580754366 | 0,00019 | 0,706616822  | 0,00001 | CELSR2   | cadherin, EGF LAG seven-pass G-type receptor 2 (flamingo homolog, Drosophila)    |
| 0,716977624 | 0,00307 | 0,853817714  | 0,00624 | CENPN    | centromere protein N                                                             |
| 1,335148303 | 0,00368 | 1,185092771  | 0,00238 | CENPV    | centromere protein V                                                             |
| 0,838568184 | 0,02763 | 0,842062954  | 0,00669 | CEP104   | centrosomal protein 104kDa                                                       |
| 1,285206337 | 0,02312 | 1,41519416   | 0,00062 | CEP128   | centrosomal protein 128kDa                                                       |
| 2,146520573 | 0,00898 | 1,594384953  | 0,01079 | CEP128   | centrosomal protein 128kDa                                                       |
| 0,785128119 | 0,00997 | 0,857376037  | 0,03058 | CEP89    | centrosomal protein 89kDa                                                        |
| 1,549711862 | 0,03589 | 1,742308384  | 0,00014 | CERCAM   | cerebral endothelial cell adhesion molecule                                      |
| 0,577142709 | 0,0231  | 0,630251696  | 0,00002 | CERS3    | ceramide synthase 3                                                              |
| 0,616853585 | 0,02273 | 0,808881348  | 0,00799 | CERS4    | ceramide synthase 4                                                              |
| 0,658839976 | 0,00945 | 0,674551267  | 0,00185 | CE2      | carboxylesterase 2                                                               |
| 0,668500248 | 0,02375 | 0,775930854  | 0,00312 | CE2      | carboxylesterase 2                                                               |
| 0,607097442 | 0,01709 | 0,816768991  | 0,01067 | CE2      | carboxylesterase 2                                                               |
| 1,262252032 | 0,02591 | 1,263127262  | 0,0031  | CETN1    | centrin, EF-hand protein, 1                                                      |
| 0,608783009 | 0,0007  | 0,813943185  | 0,00736 | CETN2    | centrin, EF-hand protein, 2                                                      |
| 1,351910833 | 0,02109 | 1,366040257  | 0,00051 | CFHR2    | complement factor H-related 2                                                    |
| 2,002774511 | 0,01036 | 1,866065983  | 0,00004 | CFI      | complement factor I                                                              |
| 1,830198336 | 0,00049 | 1,344434994  | 0,0028  | CFL2     | cofilin 2 (muscle)                                                               |
| 1,543280175 | 0,00099 | 1,21335356   | 0,00783 | CFLAR    | CASP8 and FADD-like apoptosis regulator                                          |
| 1,45195828  | 0,00223 | 1,284315809  | 0,00362 | CFP      | complement factor properdin                                                      |
| 0,589269704 | 0,00229 | 0,704172113  | 0,00154 | CGN      | cingulin                                                                         |
| 0,739693755 | 0,01946 | 0,772175133  | 0,00416 | CGN      | cingulin                                                                         |
| 1,950710923 | 0,00101 | 1,425037614  | 0,02063 | CHAC1    | ChaC, cation transport regulator homolog 1 (E. coli)                             |
| 0,830470024 | 0,03019 | 0,8362464    | 0,00027 | CHCHD4   | coiled-coil-helix-coiled-coil-helix domain containing 4                          |
| 0,560583039 | 0,01315 | 0,683493726  | 0,00002 | CHD9     | chromodomain helicase DNA binding protein 9                                      |
| 0,487677731 | 0,04982 | 0,6341957    | 0,03186 | CHD9     | chromodomain helicase DNA binding protein 9                                      |
| 0,747424624 | 0,03682 | 0,817902059  | 0,01049 | CHEK1    | CHK1 checkpoint homolog (S. pombe)                                               |
| 2,043440165 | 0,00039 | 1,308578071  | 0,03949 | CHI3L2   | chitinase 3-like 2                                                               |
| 0,378666579 | 0,01874 | 0,55554364   | 0,00063 | CHL1     | cell adhesion molecule with homology to L1CAM (close homolog of L1)              |
| 0,677362489 | 0,02799 | 0,8362464    | 0,00047 | CHMP4A   | chromatin modifying protein 4A                                                   |
| 0,717474767 | 0,0222  | 0,811127156  | 0,00318 | CHMP4B   | chromatin modifying protein 4B                                                   |
| 0,490049708 | 0,01675 | 0,71548826   | 0,01064 | CHMP4C   | chromatin modifying protein 4C                                                   |
| 0,523405141 | 0,01331 | 0,54112322   | 0,00471 | CHP      | calcium binding protein P22                                                      |
| 0,724471077 | 0,01826 | 0,821310701  | 0,00966 | CHP      | calcium binding protein P22                                                      |
| 1,446934886 | 0,02424 | 1,53049677   | 0,00067 | CHPF     | chondroitin polymerizing factor                                                  |
| 0,486327474 | 0,00616 | 0,662503509  | 0,04566 | CHRNA9   | cholinergic receptor, nicotinic, alpha 9                                         |
| 1,188383105 | 0,02864 | 1,195819797  | 0,02417 | CHST10   | carbohydrate sulfotransferase 10                                                 |
| 1,650610817 | 0,00961 | 1,503161478  | 0,00472 | CHST11   | carbohydrate (chondroitin 4) sulfotransferase 11                                 |



|             |         |             |         |          |                                                                                   |
|-------------|---------|-------------|---------|----------|-----------------------------------------------------------------------------------|
| 1,373636233 | 0,00574 | 1,304954948 | 0,01751 | CHST11   | carbohydrate (chondroitin 4) sulfotransferase 11                                  |
| 1,634670657 | 0,00071 | 1,691144575 | 0       | CHST11   | carbohydrate (chondroitin 4) sulfotransferase 11                                  |
| 1,689972769 | 0,00045 | 1,441928871 | 0,00006 | CHST12   | carbohydrate (chondroitin 4) sulfotransferase 12                                  |
| 1,479387509 | 0,01522 | 1,382232207 | 0,00106 | CHST12   | carbohydrate (chondroitin 4) sulfotransferase 12                                  |
| 1,558329159 | 0,00155 | 1,486582984 | 0,00039 | CHST15   | carbohydrate (N-acetylgalactosamine 4-sulfate 6-O) sulfotransferase 15            |
| 3,997228372 | 0,00001 | 2,857988279 | 0,00001 | CHST2    | carbohydrate (N-acetylglucosamine-6-O) sulfotransferase 2                         |
| 1,815038311 | 0,03571 | 1,219255094 | 0,04891 | CHSY3    | chondroitin sulfate synthase 3                                                    |
| 0,824733549 | 0,02344 | 0,898755127 | 0,03204 | CIAPIN1  | cytokine induced apoptosis inhibitor 1                                            |
| 0,767373048 | 0,03446 | 0,734584317 | 0,01365 | CIDEA    | cell death-inducing DFFA-like effector 4                                          |
| 0,743806881 | 0,0187  | 0,821310701 | 0,00153 | CIRH1A   | cirrhosis, autosomal recessive 1A (cirhin)                                        |
| 2,531513188 | 0,00148 | 2,168954818 | 0,00237 | CKAP2    | cytoskeleton associated protein 2                                                 |
| 1,277213759 | 0,02416 | 1,2397077   | 0,0463  | CKAP2    | cytoskeleton associated protein 2                                                 |
| 1,527317498 | 0,02653 | 1,714752073 | 0,00099 | CKAP2    | cytoskeleton associated protein 2                                                 |
| 3,396384986 | 0,02656 | 5,08060393  | 0,00002 | CKAP2    | cytoskeleton associated protein 2                                                 |
| 1,294145654 | 0,01008 | 1,223488041 | 0,01367 | CKLF     | chemokine-like factor                                                             |
| 0,703684188 | 0,00125 | 0,870550563 | 0,02536 | CKS1B    | CDC28 protein kinase regulatory subunit 1B                                        |
| 0,66342257  | 0,0319  | 0,759962428 | 0,03167 | CLCA2    | chloride channel accessory 2                                                      |
| 0,66158572  | 0,03045 | 0,765778999 | 0,02683 | CLCA2    | chloride channel accessory 2                                                      |
| 0,503826888 | 0,01515 | 0,717474767 | 0,00166 | CLCN3    | chloride channel 3                                                                |
| 0,580754366 | 0,02179 | 0,620713746 | 0,00021 | CLCN3    | chloride channel 3                                                                |
| 0,533662669 | 0,00281 | 0,671286251 | 0,00248 | CLCN3    | chloride channel 3                                                                |
| 1,194163187 | 0,04357 | 1,163120042 | 0,02817 | CLCN4    | chloride channel 4                                                                |
| 1,279872414 | 0,04924 | 1,270150983 | 0,00277 | CLCN7    | chloride channel 7                                                                |
| 2,542063379 | 0,00002 | 2,399942765 | 0       | CLDN10   | claudin 10                                                                        |
| 0,307999518 | 0,00005 | 0,491410299 | 0,00048 | CLDN20   | claudin 20                                                                        |
| 0,727994774 | 0,01163 | 0,76630998  | 0,01602 | CLDN4    | claudin 4                                                                         |
| 1,328685814 | 0,00881 | 1,245737416 | 0,00671 | CLEC14A  | C-type lectin domain family 14, member A                                          |
| 1,488645255 | 0,01144 | 1,519924856 | 0,00001 | CLEC1A   | C-type lectin domain family 1, member A                                           |
| 1,210833084 | 0,03546 | 1,081474763 | 0,0347  | CLEC4D   | C-type lectin domain family 4, member D                                           |
| 1,234562607 | 0,03012 | 1,187559666 | 0,00793 | CLEC4E   | C-type lectin domain family 4, member E                                           |
| 1,393777239 | 0,02225 | 1,17609125  | 0,01467 | CLECL1   | C-type lectin-like 1                                                              |
| 1,218410264 | 0,04906 | 1,146312186 | 0,00763 | CLGN     | calmegin                                                                          |
| 1,468150636 | 0,00859 | 1,283425898 | 0,01015 | CLIC6    | chloride intracellular channel 6                                                  |
| 0,409802304 | 0,00199 | 0,467487599 | 0       | CLIP1    | CAP-GLY domain containing linker protein 1                                        |
| 0,622005827 | 0,00167 | 0,642157904 | 0,00007 | CLIP1    | CAP-GLY domain containing linker protein 1                                        |
| 0,635956503 | 0,00219 | 0,700763725 | 0,00643 | CLIP4    | CAP-GLY domain containing linker protein family, member 4                         |
| 1,462057448 | 0,03052 | 1,282536603 | 0,01794 | CLMP     | CXADR-like membrane protein                                                       |
| 0,673616788 | 0,00215 | 0,680185426 | 0,00003 | CLN8     | ceroid-lipofuscinosis, neuronal 8 (epilepsy, progressive with mental retardation) |
| 0,41754396  | 0,00259 | 0,552865327 | 0,00006 | CLN8     | ceroid-lipofuscinosis, neuronal 8 (epilepsy, progressive with mental retardation) |
| 0,596254436 | 0,00759 | 0,734584317 | 0,0253  | CLN8     | ceroid-lipofuscinosis, neuronal 8 (epilepsy, progressive with mental retardation) |
| 0,475659138 | 0,0017  | 0,60332196  | 0,0001  | CLN8     | ceroid-lipofuscinosis, neuronal 8 (epilepsy, progressive with mental retardation) |
| 0,467487599 | 0,01194 | 0,577943353 | 0,00005 | CLN8     | ceroid-lipofuscinosis, neuronal 8 (epilepsy, progressive with mental retardation) |
| 0,840896415 | 0,04393 | 0,787307977 | 0,00266 | CLP1     | CLP1, cleavage and polyadenylation factor I subunit, homolog (S. cerevisiae)      |
| 1,461044379 | 0,02056 | 1,274560627 | 0,00259 | CLPTM1L  | CLPTM1-like                                                                       |
| 0,641712949 | 0,02271 | 0,694477568 | 0,00116 | CLPX     | ClpX caseinolytic peptidase X homolog (E. coli)                                   |
| 1,252664439 | 0,0311  | 1,232852325 | 0,00043 | CLRN1    | clarin 1                                                                          |
| 0,391205891 | 0,02713 | 0,808881348 | 0,03984 | CLTB     | clathrin, light chain B                                                           |
| 0,544121221 | 0,00314 | 0,804966138 | 0,00547 | CLTB     | clathrin, light chain B                                                           |
| 1,404444876 | 0,04912 | 1,298638603 | 0,04829 | CMAHP    | cytidine monophospho-N-acetylneuraminic acid hydroxylase, pseudogene              |
| 1,393777239 | 0,02225 | 1,319507911 | 0,0002  | CMAHP    | cytidine monophospho-N-acetylneuraminic acid hydroxylase, pseudogene              |
| 0,545631939 | 0,0017  | 0,572758949 | 0,00146 | CMAS     | cytidine monophosphate N-acetylneuraminic acid synthetase                         |
| 1,345367209 | 0,00645 | 1,425037614 | 0,00006 | CMKLR1   | chemokine-like receptor 1                                                         |
| 1,502119927 | 0,0084  | 1,297738767 | 0,00887 | CMTM2    | CKLF-like MARVEL transmembrane domain containing 2                                |
| 1,840375301 | 0,00154 | 1,53900722  | 0,0006  | CMTM7    | CKLF-like MARVEL transmembrane domain containing 7                                |
| 1,953417058 | 0,00029 | 1,42800398  | 0,00024 | CMTM7    | CKLF-like MARVEL transmembrane domain containing 7                                |
| 0,544121221 | 0,01187 | 0,767373048 | 0,00966 | CNPB     | CCHC-type zinc finger, nucleic acid binding protein                               |
| 0,488354264 | 0,04044 | 0,76154437  | 0,02691 | CNFN     | cornifelin                                                                        |
| 1,326845141 | 0,03175 | 1,385109468 | 0,00005 | CNGB1    | cyclic nucleotide gated channel beta 1                                            |
| 1,284315809 | 0,02321 | 1,143930973 | 0,04788 | CNGB1    | cyclic nucleotide gated channel beta 1                                            |
| 0,70514898  | 0,0127  | 0,79774524  | 0,00019 | CNIH4    | cornichon homolog 4 (Drosophila)                                                  |
| 0,624598063 | 0,03692 | 0,593368399 | 0,00001 | CNKS3    | CNKS3 family member 3                                                             |
| 1,478362431 | 0,02195 | 1,192508872 | 0,0342  | CNN1     | calponin 1, basic, smooth muscle                                                  |
| 1,231144413 | 0,00968 | 1,202469249 | 0,0253  | CNNM2    | cyclin M2                                                                         |
| 1,189207115 | 0,04274 | 1,195819797 | 0,00104 | CNNM2    | cyclin M2                                                                         |
| 0,688725023 | 0,03421 | 0,877213549 | 0,00632 | CNOT10   | CCR4-NOT transcription complex, subunit 10                                        |
| 0,610896551 | 0,00462 | 0,779704843 | 0,00036 | CNOT2    | CCR4-NOT transcription complex, subunit 2                                         |
| 0,709070018 | 0,0164  | 0,822450069 | 0,00408 | CNOT6    | CCR4-NOT transcription complex, subunit 6                                         |
| 0,61429349  | 0,01225 | 0,762600827 | 0,00015 | CNOT6    | CCR4-NOT transcription complex, subunit 6                                         |
| 1,295940965 | 0,00648 | 1,245737416 | 0,00782 | CNPY4    | canopy 4 homolog (zebrafish)                                                      |
| 1,350037985 | 0,03628 | 1,146312186 | 0,00996 | CNR1     | cannabinoid receptor 1 (brain)                                                    |
| 1,549711862 | 0,00726 | 1,426025717 | 0,00018 | CNR1P1   | cannabinoid receptor interacting protein 1                                        |
| 1,397646972 | 0,01678 | 1,492778383 | 0,00054 | CNTD2    | cyclin N-terminal domain containing 2                                             |
| 1,699369998 | 0,01615 | 1,20163605  | 0,00741 | CNTN4    | contactin 4                                                                       |
| 1,391846392 | 0,02376 | 1,366040257 | 0,00008 | CNTNAP1  | contactin associated protein 1                                                    |
| 1,29145735  | 0,0051  | 1,123499903 | 0,0279  | CNTROB   | centrobin, centrosomal BRCA2 interacting protein                                  |
| 0,447822835 | 0,00003 | 0,576343173 | 0,00002 | COBL     | cordón-bleu homolog (mouse)                                                       |
| 0,475988954 | 0,00124 | 0,511568735 | 0       | COBL     | cordón-bleu homolog (mouse)                                                       |
| 0,586824089 | 0,00026 | 0,794985251 | 0,00305 | COIL     | coilin                                                                            |
| 1,210833084 | 0,03305 | 1,187559666 | 0,03644 | COL14A1  | collagen, type XIV, alpha 1                                                       |
| 2,228387302 | 0,00018 | 1,857033705 | 0,00008 | COL15A1  | collagen, type XV, alpha 1                                                        |
| 0,437392382 | 0,02327 | 0,752623374 | 0,03689 | COL17A1  | collagen, type XVII, alpha 1                                                      |
| 1,350037985 | 0,01761 | 1,53049677  | 0,00001 | COL23A1  | collagen, type XXIII, alpha 1                                                     |
| 1,946658748 | 0,0013  | 1,8263965   | 0,00001 | COL4A1   | collagen, type IV, alpha 1                                                        |
| 1,949359262 | 0,01321 | 2,056227653 | 0,00005 | COL4A2   | collagen, type IV, alpha 2                                                        |
| 2,187070915 | 0,00128 | 1,465100875 | 0,00538 | COL4A3   | collagen, type IV, alpha 3 (Goodpasture antigen)                                  |
| 0,715984371 | 0,04348 | 0,837406488 | 0,01116 | COL4A3BP | collagen, type IV, alpha 3 (Goodpasture antigen) binding protein                  |
| 1,807505454 | 0,0021  | 1,398616083 | 0,00478 | COL4A4   | collagen, type IV, alpha 4                                                        |
| 0,602068691 | 0,04957 | 0,751059963 | 0,00538 | COL4A5   | collagen, type IV, alpha 5                                                        |
| 0,679243142 | 0,01516 | 0,759435845 | 0,0064  | COL4A6   | collagen, type IV, alpha 6                                                        |
| 0,809442217 | 0,0414  | 0,883927531 | 0,03148 | COL6A1   | collagen, type VI, alpha 1                                                        |
| 0,706616822 | 0,03544 | 0,679243142 | 0,00002 | COMMD2   | COMM domain containing 2                                                          |
| 0,77271055  | 0,00401 | 0,914465089 | 0,04403 | COMMD6   | COMM domain containing 6                                                          |
| 0,796640096 | 0,03782 | 0,872967591 | 0,01919 | COPG2    | coatamer protein complex, subunit gamma 2                                         |
| 0,651122095 | 0,02275 | 0,84323111  | 0,00157 | COP53    | COP9 constitutive photomorphogenic homolog subunit 3 (Arabidopsis)                |
| 0,639492791 | 0,00773 | 0,756808396 | 0,00044 | COP55    | COP9 constitutive photomorphogenic homolog subunit 5 (Arabidopsis)                |
| 0,600401714 | 0,00694 | 0,60332196  | 0       | COQ2     | coenzyme Q2 homolog, prenyltransferase (yeast)                                    |
| 2,049113646 | 0,01662 | 2,142061646 | 0,00007 | CORO1A   | coronin, actin binding protein, 1A                                                |
| 0,630688704 | 0,00358 | 0,870550563 | 0,04418 | CORO2A   | coronin, actin binding protein, 2A                                                |

|             |         |             |         |            |                                                                                        |
|-------------|---------|-------------|---------|------------|----------------------------------------------------------------------------------------|
| 1,946658748 | 0,03999 | 1,699369998 | 0,00089 | COTL1      | coactosin-like 1 (Dictyostelium)                                                       |
| 0,672683604 | 0,04871 | 0,847919965 | 0,00178 | COX5B      | cytochrome c oxidase subunit Vb                                                        |
| 0,686342216 | 0,02422 | 0,890692901 | 0,00689 | COX6C      | cytochrome c oxidase subunit VIc                                                       |
| 0,70270935  | 0,00478 | 0,856781955 | 0,00797 | COX7B      | cytochrome c oxidase subunit VIIb                                                      |
| 0,563309614 | 0,00149 | 0,806641759 | 0,01581 | CPA4       | carboxypeptidase A4                                                                    |
| 0,474013483 | 0,01462 | 0,557869661 | 0,00002 | CPEB2      | cytoplasmic polyadenylation element binding protein 2                                  |
| 0,764718139 | 0,03946 | 0,834509281 | 0,01212 | CPEB2      | cytoplasmic polyadenylation element binding protein 2                                  |
| 0,543367431 | 0,0346  | 0,620713746 | 0,00108 | CPM        | carboxypeptidase M                                                                     |
| 2,881859498 | 0,00011 | 2,74156561  | 0,00001 | CPNE5      | copine V                                                                               |
| 0,741233505 | 0,02766 | 0,807760778 | 0,00198 | CPSF3      | cleavage and polyadenylation specific factor 3, 73kDa                                  |
| 1,279872414 | 0,01606 | 1,142346247 | 0,04592 | CR1        | complement component (3b/4b) receptor 1 (Knops blood group)                            |
| 1,232852325 | 0,00667 | 1,150291893 | 0,02122 | CR1        | complement component (3b/4b) receptor 1 (Knops blood group)                            |
| 1,572434584 | 0,00212 | 1,30224419  | 0,03845 | CR1        | complement component (3b/4b) receptor 1 (Knops blood group)                            |
| 2,323017464 | 0,00167 | 1,614402149 | 0,00313 | CR1        | complement component (3b/4b) receptor 1 (Knops blood group)                            |
| 2,134650676 | 0,00019 | 1,53900722  | 0,00035 | CR2        | complement component (3d/Epstein Barr virus) receptor 2                                |
| 1,328685814 | 0,01669 | 1,221793102 | 0,00462 | CRAT       | carnitine O-acetyltransferase                                                          |
| 1,171210181 | 0,04684 | 1,121943481 | 0,0079  | CRB2       | crumbs homolog 2 (Drosophila)                                                          |
| 1,599920257 | 0,00387 | 1,4054187   | 0,00003 | CREB3L2    | cAMP responsive element binding protein 3-like 2                                       |
| 1,400556321 | 0,00268 | 1,421092043 | 0,00003 | CREB3L2    | cAMP responsive element binding protein 3-like 2                                       |
| 1,602139755 | 0,02064 | 1,505246747 | 0,00004 | CRELD2     | cysteine-rich with EGF-like domains 2                                                  |
| 0,774319028 | 0,04178 | 0,792234811 | 0,00063 | CRIP1      | cysteine-rich PDZ-binding protein                                                      |
| 0,70270935  | 0,01275 | 0,827023368 | 0,00012 | CRKL       | v-crk sarcoma virus CT10 oncogene homolog (avian)-like                                 |
| 0,762072415 | 0,04013 | 0,72597914  | 0,00282 | CRLS1      | cardiolipin synthase 1                                                                 |
| 0,76154437  | 0,00927 | 0,785672517 | 0,00522 | CRNDE      | colorectal neoplasia differentially expressed (non-protein coding)                     |
| 1,32592576  | 0,01556 | 1,230291345 | 0,00507 | CRTAP      | cartilage associated protein                                                           |
| 0,512278412 | 0,00345 | 0,734584317 | 0,02166 | CRYAB      | crystallin, alpha B                                                                    |
| 1,25092908  | 0,03062 | 1,193335743 | 0,00415 | CRYBB3     | crystallin, beta B3                                                                    |
| 0,631563631 | 0,02539 | 0,765778999 | 0,00024 | CRYBG3     | beta-gamma crystallin domain containing 3                                              |
| 0,689680461 | 0,00041 | 0,720964436 | 0,01748 | CRYGS      | crystallin, gamma 5                                                                    |
| 0,773782497 | 0,03653 | 0,784584098 | 0,00022 | CSDA       | cold shock domain protein A                                                            |
| 0,508035071 | 0,00485 | 0,760489377 | 0,00004 | CSE1L      | CSE1 chromosome segregation 1-like (yeast)                                             |
| 0,645728675 | 0,03445 | 0,8362464   | 0,00402 | CSE1L      | CSE1 chromosome segregation 1-like (yeast)                                             |
| 1,286097483 | 0,01997 | 1,123499903 | 0,024   | CSF2       | colony stimulating factor 2 (granulocyte-macrophage)                                   |
| 1,387030969 | 0,00539 | 1,337927555 | 0,00401 | CSF2RA     | colony stimulating factor 2 receptor, alpha, low-affinity (granulocyte-macrophage)     |
| 1,222640278 | 0,04362 | 1,237132479 | 0,01177 | CSF2RA     | colony stimulating factor 2 receptor, alpha, low-affinity (granulocyte-macrophage)     |
| 2,718856484 | 0,00001 | 1,965641197 | 0,00002 | CSF2RB     | colony stimulating factor 2 receptor, beta, low-affinity (granulocyte-macrophage)      |
| 2,368543224 | 0,00002 | 2,357078816 | 0,00001 | CSF3       | colony stimulating factor 3 (granulocyte)                                              |
| 1,844206236 | 0,00015 | 1,741101127 | 0,00019 | CSF3R      | colony stimulating factor 3 receptor (granulocyte)                                     |
| 2,084931522 | 0,00004 | 1,86735989  | 0,00002 | CSF3R      | colony stimulating factor 3 receptor (granulocyte)                                     |
| 1,48246701  | 0,01153 | 1,254402205 | 0,00804 | CSGALNACT1 | chondroitin sulfate N-acetylgalactosaminyltransferase 1                                |
| 1,261377409 | 0,0458  | 1,176906737 | 0,00319 | CSMD2      | CU5 and Sushi multiple domains 2                                                       |
| 0,564091069 | 0,00991 | 0,615145672 | 0,00104 | CSNK1A1    | casein kinase 1, alpha 1                                                               |
| 0,566049451 | 0,0291  | 0,797192477 | 0,0493  | CSNK1A1    | casein kinase 1, alpha 1                                                               |
| 0,593779833 | 0,00182 | 0,815637493 | 0,00016 | CSNK1A1    | casein kinase 1, alpha 1                                                               |
| 0,536630143 | 0,00592 | 0,620283649 | 0,00135 | CSNK1A1    | casein kinase 1, alpha 1                                                               |
| 0,641712949 | 0,00325 | 0,752101876 | 0,00158 | CSNK1A1    | casein kinase 1, alpha 1                                                               |
| 0,693034943 | 0,01307 | 0,756283999 | 0,00223 | CSNK1A1    | casein kinase 1, alpha 1                                                               |
| 0,515484159 | 0,03646 | 0,670821112 | 0,03049 | CSNK1A1    | casein kinase 1, alpha 1                                                               |
| 0,652477474 | 0,0299  | 0,796640096 | 0,00012 | CSNK2A2    | casein kinase 2, alpha prime polypeptide                                               |
| 0,503477775 | 0,00006 | 0,622005827 | 0,00001 | CSR2       | cysteine and glycine-rich protein 2                                                    |
| 0,435275282 | 0,00187 | 0,7031966   | 0,00202 | CSR2       | cysteine and glycine-rich protein 2                                                    |
| 0,785672517 | 0,02591 | 0,788946841 | 0,00091 | CSR2BP     | CSR2 binding protein                                                                   |
| 0,552865327 | 0,00096 | 0,713012859 | 0,01065 | CST6       | cystatin E/M                                                                           |
| 1,504203751 | 0,03249 | 1,460032011 | 0,00023 | CST7       | cystatin F (leukocystatin)                                                             |
| 0,726986259 | 0,01362 | 0,767373048 | 0,02793 | CSTF3      | cleavage stimulation factor, 3' pre-RNA, subunit 3, 77kDa                              |
| 0,768970416 | 0,03746 | 0,906261938 | 0,04321 | CTCF       | CCCTC-binding factor (zinc finger protein)                                             |
| 0,557869661 | 0,00546 | 0,804408371 | 0,0166  | CTDSPL     | CTD (carboxy-terminal domain, RNA polymerase II, polypeptide A) small phosphatase-like |
| 2,440201021 | 0,00024 | 1,629015126 | 0,03554 | CTGF       | connective tissue growth factor                                                        |
| 1,508380077 | 0,00682 | 1,22603486  | 0,00048 | CTH        | cystathionase (cystathionine gamma-lyase)                                              |
| 2,789487333 | 0,00053 | 1,604362333 | 0,00029 | CTH        | cystathionase (cystathionine gamma-lyase)                                              |
| 1,190031696 | 0,04013 | 1,266634254 | 0,00039 | CTLA4      | cytotoxic T-lymphocyte-associated protein 4                                            |
| 1,448942155 | 0,00555 | 1,223488041 | 0,00372 | CTLA4      | cytotoxic T-lymphocyte-associated protein 4                                            |
| 1,6724928   | 0,01136 | 1,387992719 | 0,00003 | CTLA4      | cytotoxic T-lymphocyte-associated protein 4                                            |
| 0,529242197 | 0,00152 | 0,775930854 | 0,00354 | CTNNA1     | catenin (cadherin-associated protein), alpha-like 1                                    |
| 0,536258308 | 0,00966 | 0,695923196 | 0,00046 | CTNNA1     | catenin, beta interacting protein 1                                                    |
| 0,687770909 | 0,03047 | 0,750019495 | 0,00008 | CTPS       | CTP synthase                                                                           |
| 1,320422841 | 0,00287 | 1,190031696 | 0,00271 | CTSB       | cathepsin B                                                                            |
| 2,212994706 | 0,00001 | 1,929196369 | 0       | CTSH       | cathepsin H                                                                            |
| 1,591072968 | 0,00061 | 1,347233577 | 0,00544 | CTSL1      | cathepsin L1                                                                           |
| 0,555554364 | 0,00753 | 0,760489377 | 0,04338 | CTSL2      | cathepsin L2                                                                           |
| 2,153972752 | 0,00202 | 1,644900137 | 0,00025 | CTSS       | cathepsin S                                                                            |
| 2,0363704   | 0,00002 | 1,687631592 | 0,00008 | CTSS       | cathepsin S                                                                            |
| 1,580082624 | 0,00376 | 1,282536603 | 0,02986 | CTSZ       | cathepsin Z                                                                            |
| 0,701249625 | 0,02712 | 0,884540435 | 0,02933 | CTTN       | cortactin                                                                              |
| 0,496546248 | 0,00387 | 0,693034943 | 0,00068 | CTTNBP2NL  | CTTNBP2 N-terminal like                                                                |
| 0,583579051 | 0,00991 | 0,732550437 | 0,00071 | CTTNBP2NL  | CTTNBP2 N-terminal like                                                                |
| 0,650220073 | 0,01066 | 0,732550437 | 0,00013 | CUL3       | cullin 3                                                                               |
| 0,643940815 | 0,01512 | 0,8362464   | 0,01558 | CUL4A      | cullin 4A                                                                              |
| 0,600818025 | 0,00457 | 0,706616822 | 0,00053 | CUL4A      | cullin 4A                                                                              |
| 0,635075491 | 0,00393 | 0,749499801 | 0,0004  | CUL4A      | cullin 4A                                                                              |
| 0,645728675 | 0,00212 | 0,716977624 | 0,0002  | CUX1       | cut-like homeobox 1                                                                    |
| 0,687770909 | 0,0228  | 0,796088099 | 0,01892 | CUX1       | cut-like homeobox 1                                                                    |
| 0,599985691 | 0,00878 | 0,489370825 | 0       | CUX1       | cut-like homeobox 1                                                                    |
| 0,642603169 | 0,01016 | 0,7944344   | 0,00024 | CWC15      | CWC15 spliceosome-associated protein homolog (S. cerevisiae)                           |
| 0,598324482 | 0,03205 | 0,739181216 | 0,00098 | CWC27      | CWC27 spliceosome-associated protein homolog (S. cerevisiae)                           |
| 0,360982299 | 0,00012 | 0,500346694 | 0       | CWH43      | cell wall biogenesis 43 C-terminal homolog (S. cerevisiae)                             |
| 0,285982743 | 0,00017 | 0,480297432 | 0,00007 | CWH43      | cell wall biogenesis 43 C-terminal homolog (S. cerevisiae)                             |
| 3,179941004 | 0,0005  | 2,938337267 | 0,00003 | CXCL1      | chemokine (C-X-C motif) ligand 1 (melanoma growth stimulating activity, alpha)         |
| 1,854461093 | 0,00481 | 2,089271526 | 0,00002 | CXCL12     | chemokine (C-X-C motif) ligand 12                                                      |
| 1,872544495 | 0,01412 | 1,845484985 | 0,00044 | CXCL12     | chemokine (C-X-C motif) ligand 12                                                      |
| 2,071965527 | 0,0051  | 2,076278541 | 0,00143 | CXCL13     | chemokine (C-X-C motif) ligand 13                                                      |
| 0,333555792 | 0,00044 | 0,639936207 | 0,0024  | CXCL14     | chemokine (C-X-C motif) ligand 14                                                      |
| 0,405001737 | 0,00266 | 0,625031151 | 0,00566 | CXCL14     | chemokine (C-X-C motif) ligand 14                                                      |
| 0,415235012 | 0,00022 | 0,636397468 | 0,00104 | CXCL14     | chemokine (C-X-C motif) ligand 14                                                      |
| 4,727246188 | 0,00023 | 2,681425183 | 0,00317 | CXCL6      | chemokine (C-X-C motif) ligand 6 (granulocyte chemotactic protein 2)                   |
| 3,802636405 | 0,00026 | 2,581124981 | 0,00002 | CXCR4      | chemokine (C-X-C motif) receptor 4                                                     |
| 3,184352395 | 0,00038 | 2,648177821 | 0,00004 | CXCR4      | chemokine (C-X-C motif) receptor 4                                                     |
| 5,411392924 | 0,00001 | 3,251262408 | 0,00002 | CXCR4      | chemokine (C-X-C motif) receptor 4                                                     |

|             |         |             |         |         |                                                                                |
|-------------|---------|-------------|---------|---------|--------------------------------------------------------------------------------|
| 0,570381858 | 0,00133 | 0,662503509 | 0       | CXorf26 | chromosome X open reading frame 26                                             |
| 0,539614118 | 0,04339 | 0,693034943 | 0,00753 | CXorf26 | chromosome X open reading frame 26                                             |
| 1,394743666 | 0,02799 | 1,465100875 | 0,00007 | CXorf36 | chromosome X open reading frame 36                                             |
| 0,682546859 | 0,00108 | 0,70027816  | 0,00006 | CYB5A   | cytochrome b5 type A (microsomal)                                              |
| 0,662503509 | 0,00036 | 0,689202576 | 0,00006 | CYB5A   | cytochrome b5 type A (microsomal)                                              |
| 0,683020128 | 0,00131 | 0,747942879 | 0,00061 | CYB5A   | cytochrome b5 type A (microsomal)                                              |
| 1,251796459 | 0,03335 | 1,237990291 | 0,00042 | CYBA    | cytochrome b-245, alpha polypeptide                                            |
| 1,331451613 | 0,01721 | 1,32408891  | 0,03881 | CYBB    | cytochrome b-245, beta polypeptide                                             |
| 1,368883813 | 0,02371 | 1,455989549 | 0,01921 | CYBB    | cytochrome b-245, beta polypeptide                                             |
| 0,76418826  | 0,04087 | 0,768437591 | 0,00029 | CYCS    | cytochrome c, somatic                                                          |
| 0,764718139 | 0,02689 | 0,741233505 | 0,00013 | CYFIP1  | cytoplasmic FMR1 interacting protein 1                                         |
| 1,702907415 | 0,00235 | 1,43296165  | 0,00499 | CYFIP2  | cytoplasmic FMR1 interacting protein 2                                         |
| 1,358486285 | 0,02574 | 1,31494276  | 0,0018  | CYFIP2  | cytoplasmic FMR1 interacting protein 2                                         |
| 1,787570325 | 0,00028 | 1,736280455 | 0,00015 | CYGB    | cytoglobin                                                                     |
| 1,394743666 | 0,04924 | 1,488645255 | 0,00005 | CYP11A1 | cytochrome P450, family 11, subfamily A, polypeptide 1                         |
| 1,268391399 | 0,03077 | 1,147107024 | 0,02497 | CYP1A1  | cytochrome P450, family 1, subfamily A, polypeptide 1                          |
| 1,75199663  | 0,00253 | 1,459020344 | 0,01332 | CYP1B1  | cytochrome P450, family 1, subfamily B, polypeptide 1                          |
| 2,134650676 | 0,02683 | 1,433955248 | 0,02007 | CYP1B1  | cytochrome P450, family 1, subfamily B, polypeptide 1                          |
| 3,233283475 | 0,00011 | 2,441893025 | 0,00002 | CYP24A1 | cytochrome P450, family 24, subfamily A, polypeptide 1                         |
| 1,304954948 | 0,0226  | 1,20664392  | 0,04319 | CYP26A1 | cytochrome P450, family 26, subfamily A, polypeptide 1                         |
| 0,635075491 | 0,04645 | 0,735603373 | 0,00882 | CYP26B1 | cytochrome P450, family 26, subfamily B, polypeptide 1                         |
| 0,527045712 | 0,00435 | 0,630688704 | 0,00009 | CYP27C1 | cytochrome P450, family 27, subfamily C, polypeptide 1                         |
| 0,475000191 | 0,0006  | 0,573553512 | 0,00029 | CYP2C18 | cytochrome P450, family 2, subfamily C, polypeptide 18                         |
| 0,40528256  | 0,0011  | 0,465224829 | 0,00002 | CYP2C18 | cytochrome P450, family 2, subfamily C, polypeptide 18                         |
| 0,753145233 | 0,02639 | 0,767905135 | 0,01445 | CYP2C9  | cytochrome P450, family 2, subfamily C, polypeptide 9                          |
| 0,452189689 | 0,00044 | 0,669427628 | 0,00025 | CYP2C9  | cytochrome P450, family 2, subfamily C, polypeptide 9                          |
| 0,498961359 | 0,00022 | 0,720964436 | 0,0004  | CYP2C9  | cytochrome P450, family 2, subfamily C, polypeptide 9                          |
| 0,550189305 | 0,0019  | 0,749499801 | 0,00052 | CYP2C9  | cytochrome P450, family 2, subfamily C, polypeptide 9                          |
| 0,477641468 | 0,00007 | 0,743806881 | 0,00026 | CYP2C9  | cytochrome P450, family 2, subfamily C, polypeptide 9                          |
| 0,681129017 | 0,01381 | 0,770037174 | 0,00019 | CYP2R1  | cytochrome P450, family 2, subfamily R, polypeptide 1                          |
| 0,469761375 | 0,00968 | 0,628071191 | 0,00008 | CYP39A1 | cytochrome P450, family 39, subfamily A, polypeptide 1                         |
| 0,345318612 | 0,00014 | 0,501040803 | 0,00005 | CYP3A5  | cytochrome P450, family 3, subfamily A, polypeptide 5                          |
| 0,342695701 | 0,00046 | 0,550570799 | 0,00018 | CYP3A5  | cytochrome P450, family 3, subfamily A, polypeptide 5                          |
| 0,34484023  | 0,0048  | 0,494828328 | 0,00001 | CYP3A5  | cytochrome P450, family 3, subfamily A, polypeptide 5                          |
| 0,812815602 | 0,02432 | 0,823591017 | 0,01361 | CYP3A7  | cytochrome P450, family 3, subfamily A, polypeptide 7                          |
| 0,813943185 | 0,04308 | 0,888226796 | 0,04742 | CYP4F12 | cytochrome P450, family 4, subfamily F, polypeptide 12                         |
| 0,421615555 | 0,00066 | 0,537374586 | 0,00018 | CYP4F22 | cytochrome P450, family 4, subfamily F, polypeptide 22                         |
| 1,231144413 | 0,01321 | 1,149494848 | 0,00182 | CYP4V2  | cytochrome P450, family 4, subfamily V, polypeptide 2                          |
| 1,860899315 | 0,02242 | 1,433955248 | 0,02977 | CYP4X1  | cytochrome P450, family 4, subfamily X, polypeptide 1                          |
| 0,546767729 | 0,01578 | 0,567621051 | 0       | CYP51A1 | cytochrome P450, family 51, subfamily A, polypeptide 1                         |
| 0,527045712 | 0,0046  | 0,687294348 | 0,02631 | CYP51A1 | cytochrome P450, family 51, subfamily A, polypeptide 1                         |
| 1,237990291 | 0,0241  | 1,121943481 | 0,01263 | CYP8B1  | cytochrome P450, family 8, subfamily B, polypeptide 1                          |
| 2,455471368 | 0,00013 | 1,817556233 | 0,00612 | CYR61   | cysteine-rich, angiogenic inducer, 61                                          |
| 1,994462503 | 0,01771 | 2,034959384 | 0,00317 | CYR61   | cysteine-rich, angiogenic inducer, 61                                          |
| 1,652900636 | 0,04146 | 1,413233644 | 0,02386 | CYSLTR1 | cyteinyl leukotriene receptor 1                                                |
| 1,426025717 | 0,00847 | 1,341642225 | 0,00066 | CYTH4   | cytohesin 4                                                                    |
| 1,594384953 | 0,00532 | 1,583371732 | 0,00003 | CYTH4   | cytohesin 4                                                                    |
| 3,405814831 | 0       | 2,419988178 | 0,00035 | CYTIP   | cytohesin 1 interacting protein                                                |
| 1,365093718 | 0,01327 | 1,315854525 | 0,00184 | CYTL1   | cytokine-like 1                                                                |
| 0,296478625 | 0,00008 | 0,574747424 | 0,00026 | D4S234E | DNA segment on chromosome 4 (unique) 234 expressed sequence                    |
| 0,358240413 | 0,00016 | 0,52850902  | 0       | D4S234E | DNA segment on chromosome 4 (unique) 234 expressed sequence                    |
| 0,42513708  | 0,00013 | 0,622868708 | 0,00009 | D4S234E | DNA segment on chromosome 4 (unique) 234 expressed sequence                    |
| 0,421323415 | 0,00581 | 0,638164384 | 0,00002 | DAAM1   | dishevelled associated activator of morphogenesis 1                            |
| 0,434371093 | 0,00024 | 0,570381858 | 0       | DAAM1   | dishevelled associated activator of morphogenesis 1                            |
| 0,720964436 | 0,03191 | 0,837406488 | 0,00759 | DAAM1   | dishevelled associated activator of morphogenesis 1                            |
| 0,654289036 | 0,00303 | 0,812815602 | 0,00371 | DAAM1   | dishevelled associated activator of morphogenesis 1                            |
| 1,356604327 | 0,04846 | 1,237990291 | 0,02397 | DAAM2   | dishevelled associated activator of morphogenesis 2                            |
| 1,429984986 | 0,04717 | 1,41519416  | 0,00113 | DAB2    | disabled homolog 2, mitogen-responsive phosphoprotein (Drosophila)             |
| 1,529436278 | 0,00135 | 1,536875181 | 0,00107 | DAB2    | disabled homolog 2, mitogen-responsive phosphoprotein (Drosophila)             |
| 1,632406092 | 0,00005 | 1,56265576  | 0,00023 | DAB2    | disabled homolog 2, mitogen-responsive phosphoprotein (Drosophila)             |
| 1,254402205 | 0,03226 | 1,199139914 | 0,02312 | DAB2IP  | DAB2 interacting protein                                                       |
| 0,607939642 | 0,00651 | 0,787853886 | 0,03462 | DACT2   | dapper, antagonist of beta-catenin, homolog 2 (Xenopus laevis)                 |
| 1,857033705 | 0,00146 | 1,687631592 | 0,00002 | DAPK1   | death-associated protein kinase 1                                              |
| 0,397492625 | 0,00018 | 0,587638164 | 0,00034 | DAPL1   | death associated protein-like 1                                                |
| 1,706452196 | 0,02205 | 1,781385801 | 0,00001 | DARC    | Duffy blood group, chemokine receptor                                          |
| 0,557096825 | 0,00724 | 0,853817714 | 0,00297 | DARS    | aspartyl-tRNA synthetase                                                       |
| 0,569986636 | 0,0006  | 0,699308041 | 0,0002  | DBI     | diazepam binding inhibitor (GABA receptor modulator, acyl-CoA binding protein) |
| 0,369846877 | 0,00039 | 0,62546454  | 0,00036 | DBI     | diazepam binding inhibitor (GABA receptor modulator, acyl-CoA binding protein) |
| 0,428094142 | 0,00037 | 0,667574152 | 0,00032 | DBI     | diazepam binding inhibitor (GABA receptor modulator, acyl-CoA binding protein) |
| 1,368883813 | 0,0341  | 1,225185332 | 0,02478 | DBN1    | drebrin 1                                                                      |
| 0,624165274 | 0,02325 | 0,720964436 | 0,00212 | DBT     | dihydrolipoamide branched chain transacylase E2                                |
| 0,628942486 | 0,00981 | 0,71449707  | 0,00003 | DCAF13  | DDB1 and CUL4 associated factor 13                                             |
| 0,676424116 | 0,04833 | 0,832775771 | 0,04589 | DCAF16  | DDB1 and CUL4 associated factor 16                                             |
| 0,819604608 | 0,0333  | 0,816768991 | 0,00072 | DCAF4   | DDB1 and CUL4 associated factor 4                                              |
| 0,699308041 | 0,01564 | 0,8362464   | 0,00076 | DCAF4   | DDB1 and CUL4 associated factor 4                                              |
| 0,723969086 | 0,03067 | 0,790041312 | 0,0007  | DCAF6   | DDB1 and CUL4 associated factor 6                                              |
| 1,636938363 | 0,00274 | 1,185914499 | 0,01826 | DCC     | deleted in colorectal carcinoma                                                |
| 1,606587994 | 0,00424 | 1,43893358  | 0,00185 | DCHS1   | dachsous 1 (Drosophila)                                                        |
| 0,636397468 | 0,04725 | 0,782411782 | 0,00962 | DCLRE1C | DNA cross-link repair 1C                                                       |
| 1,292352831 | 0,03346 | 1,197478705 | 0,03842 | DCP1B   | DCP1 decapping enzyme homolog B (S. cerevisiae)                                |
| 0,767373048 | 0,04591 | 0,879039561 | 0,01006 | DCUN1D1 | DCN1, defective in cullin neddylation 1, domain containing 1 (S. cerevisiae)   |
| 0,773246337 | 0,01433 | 0,755759964 | 0,00524 | DCUN1D3 | DCN1, defective in cullin neddylation 1, domain containing 3 (S. cerevisiae)   |
| 0,639492791 | 0,02773 | 0,855002178 | 0,04977 | DDAH2   | dimethylarginine dimethylaminohydrolase 2                                      |
| 0,422786144 | 0,0157  | 0,726482525 | 0,00435 | DDI2    | DNA-damage inducible 1 homolog 2 (S. cerevisiae)                               |
| 1,816296835 | 0,02744 | 1,670175839 | 0       | DDIT4   | DNA-damage-inducible transcript 4                                              |
| 1,962918128 | 0,01304 | 2,111107435 | 0,00025 | DDIT4L  | DNA-damage-inducible transcript 4-like                                         |
| 1,238848698 | 0,01203 | 1,155085785 | 0,03805 | DDR2    | discoidin domain receptor tyrosine kinase 2                                    |
| 0,621144141 | 0,00611 | 0,790041312 | 0,00006 | DDX1    | DEAD (Asp-Glu-Ala-Asp) box polypeptide 1                                       |
| 0,571569168 | 0,01404 | 0,726986259 | 0,0112  | DDX21   | DEAD (Asp-Glu-Ala-Asp) box polypeptide 21                                      |
| 0,661127303 | 0,01703 | 0,776468875 | 0,00225 | DDX46   | DEAD (Asp-Glu-Ala-Asp) box polypeptide 46                                      |
| 0,768970416 | 0,01487 | 0,782954296 | 0,00781 | DDX49   | DEAD (Asp-Glu-Ala-Asp) box polypeptide 49                                      |
| 0,651573575 | 0,00041 | 0,821880187 | 0,04268 | DDX50   | DEAD (Asp-Glu-Ala-Asp) box polypeptide 50                                      |
| 0,699792933 | 0,03505 | 0,872967591 | 0,00292 | DDX50   | DEAD (Asp-Glu-Ala-Asp) box polypeptide 50                                      |
| 0,755759964 | 0,04159 | 0,819036698 | 0,0166  | DDX51   | DEAD (Asp-Glu-Ala-Asp) box polypeptide 51                                      |
| 0,593779833 | 0,00405 | 0,731028724 | 0,00009 | DDX52   | DEAD (Asp-Glu-Ala-Asp) box polypeptide 52                                      |
| 0,593368399 | 0,02059 | 0,670356296 | 0       | DDX52   | DEAD (Asp-Glu-Ala-Asp) box polypeptide 52                                      |
| 0,554016174 | 0,03356 | 0,831045862 | 0,00958 | DECR1   | 2,4-dienoyl CoA reductase 1, mitochondrial                                     |
| 0,581157054 | 0,0498  | 0,650670928 | 0,00005 | DEFB1   | defensin, beta 1                                                               |

|             |         |             |         |              |                                                                                                               |
|-------------|---------|-------------|---------|--------------|---------------------------------------------------------------------------------------------------------------|
| 1,138394029 | 0,04035 | 1,148698355 | 0,01213 | DEFB127      | defensin, beta 127                                                                                            |
| 0,508035071 | 0,0053  | 0,590496331 | 0,00004 | DEGS1        | degenerative spermatocyte homolog 1, lipid desaturase (Drosophila)                                            |
| 0,681129017 | 0,0075  | 0,800514811 | 0,04121 | DEGS2        | degenerative spermatocyte homolog 2, lipid desaturase (Drosophila)                                            |
| 0,67877249  | 0,02537 | 0,76154437  | 0,00073 | DEK          | DEK oncogene                                                                                                  |
| 0,76101669  | 0,01029 | 0,853817714 | 0,00713 | DEM1         | defects in morphology 1 homolog (S. cerevisiae)                                                               |
| 1,781385801 | 0,00105 | 1,638073396 | 0,00006 | DENN1C       | DENN/MADD domain containing 1C                                                                                |
| 0,540362701 | 0,02028 | 0,597495602 | 0       | DENN2C       | DENN/MADD domain containing 2C                                                                                |
| 0,541862983 | 0,00335 | 0,652025368 | 0,00064 | DENN2C       | DENN/MADD domain containing 2C                                                                                |
| 1,494849249 | 0,00493 | 1,603250659 | 0,00001 | DENN3        | DENN/MADD domain containing 3                                                                                 |
| 1,674812975 | 0,00132 | 1,504203751 | 0,00001 | DENN3        | DENN/MADD domain containing 3                                                                                 |
| 0,361984543 | 0,00244 | 0,727994774 | 0,00301 | DENN4C       | DENN/MADD domain containing 4C                                                                                |
| 1,699369998 | 0,00154 | 1,41029796  | 0,00045 | DENN5B       | DENN/MADD domain containing 5B                                                                                |
| 2,486299338 | 0,00019 | 1,769080871 | 0,00091 | DENN5B       | DENN/MADD domain containing 5B                                                                                |
| 1,480413298 | 0,00641 | 1,20664392  | 0,00916 | DENN5B       | DENN/MADD domain containing 5B                                                                                |
| 0,689202576 | 0,01494 | 0,76950361  | 0,00014 | DENR         | density-regulated protein                                                                                     |
| 0,596254436 | 0,03952 | 0,481630947 | 0,00002 | DENR         | density-regulated protein                                                                                     |
| 0,708578698 | 0,01947 | 0,76630998  | 0,0005  | DEPTOR       | DEP domain containing MTOR-interacting protein                                                                |
| 1,308578071 | 0,02861 | 1,21335356  | 0,00312 | DERL1        | Der1-like domain family, member 1                                                                             |
| 1,473247686 | 0,0034  | 1,212512819 | 0,00411 | DERL1        | Der1-like domain family, member 1                                                                             |
| 2,136130816 | 0,00038 | 2,286276671 | 0,00001 | DERL3        | Der1-like domain family, member 3                                                                             |
| 3,38932974  | 0,00013 | 3,168939244 | 0       | DERL3        | Der1-like domain family, member 3                                                                             |
| 1,512567997 | 0,00164 | 1,226884977 | 0,01432 | DET1         | de-etiolated homolog 1 (Arabidopsis)                                                                          |
| 0,648419777 | 0,00088 | 0,809442217 | 0,00529 | DGAT2        | diacylglycerol O-acyltransferase 2                                                                            |
| 0,490049708 | 0,00021 | 0,706127202 | 0,00119 | DGAT2        | diacylglycerol O-acyltransferase 2                                                                            |
| 1,261377409 | 0,02442 | 1,350974085 | 0,00022 | DGCR7        | DiGeorge syndrome critical region gene 7                                                                      |
| 0,652477474 | 0,02056 | 0,762072415 | 0,00317 | DHCR7        | 7-dehydrocholesterol reductase                                                                                |
| 0,806641759 | 0,03053 | 0,736113431 | 0,00058 | DHCR7        | 7-dehydrocholesterol reductase                                                                                |
| 0,728499557 | 0,04626 | 0,794985251 | 0,00006 | DHFR         | dihydrofolate reductase                                                                                       |
| 0,635956503 | 0,04083 | 0,793883931 | 0,00809 | DHRS1        | dehydrogenase/reductase (SDR family) member 1                                                                 |
| 1,283425898 | 0,02876 | 1,186736798 | 0,03128 | DHTKD1       | dehydrogenase E1 and transketolase domain containing 1                                                        |
| 0,598739352 | 0,00221 | 0,866336856 | 0,00356 | DHX32        | DEAH (Asp-Glu-Ala-His) box polypeptide 32                                                                     |
| 0,501735874 | 0,00801 | 0,652929894 | 0,00005 | DIAPH2       | diaphanous homolog 2 (Drosophila)                                                                             |
| 0,687294348 | 0,04789 | 0,733566672 | 0,00037 | DIAPH2       | diaphanous homolog 2 (Drosophila)                                                                             |
| 0,815637493 | 0,01935 | 0,89564567  | 0,01674 | DIAPH3       | diaphanous homolog 3 (Drosophila)                                                                             |
| 0,710546022 | 0,02029 | 0,716977624 | 0,00536 | DIP2B        | DIP2 disco-interacting protein 2 homolog B (Drosophila)                                                       |
| 0,508035071 | 0,00697 | 0,62981499  | 0,00001 | DIP2B        | DIP2 disco-interacting protein 2 homolog B (Drosophila)                                                       |
| 0,725797914 | 0,02817 | 0,821880187 | 0,0311  | DIP2B        | DIP2 disco-interacting protein 2 homolog B (Drosophila)                                                       |
| 0,720464874 | 0,00709 | 0,703684188 | 0,00112 | DIRC2        | disrupted in renal carcinoma 2                                                                                |
| 1,22010051  | 0,01665 | 1,167967395 | 0,01553 | DISC1        | disrupted in schizophrenia 1                                                                                  |
| 1,262252032 | 0,03115 | 1,159899655 | 0,00595 | DKFZP434A06  | hypothetical LOC26102                                                                                         |
| 0,692074858 | 0,01617 | 0,815072332 | 0,00791 | DKFZp547G18  | hypothetical LOC55525                                                                                         |
| 0,699792933 | 0,01021 | 0,860352631 | 0,02831 | DKFZP586I142 | hypothetical protein DKFZp586I1420                                                                            |
| 1,283425898 | 0,04398 | 1,217566019 | 0,00604 | DLEC1        | deleted in lung and esophageal cancer 1                                                                       |
| 0,692554734 | 0,02146 | 0,843815796 | 0,01659 | DLG3         | discs, large homolog 3 (Drosophila)                                                                           |
| 0,859756486 | 0,04571 | 0,863339559 | 0,04988 | DLG3         | discs, large homolog 3 (Drosophila)                                                                           |
| 0,680657058 | 0,00235 | 0,805524291 | 0,00014 | DLG5         | discs, large homolog 5 (Drosophila)                                                                           |
| 0,584793832 | 0,01999 | 0,650220073 | 0,00061 | DLG5         | discs, large homolog 5 (Drosophila)                                                                           |
| 0,638164384 | 0,01518 | 0,806082831 | 0,00045 | DLGAP4       | discs, large (Drosophila) homolog-associated protein 4                                                        |
| 0,779704843 | 0,00805 | 0,843815796 | 0,01063 | DLK2         | delta-like 2 homolog (Drosophila)                                                                             |
| 0,604997045 | 0,01653 | 0,695440986 | 0,00007 | DLX2         | distal-less homeobox 2                                                                                        |
| 0,48801588  | 0,00474 | 0,700763725 | 0,00966 | DLX3         | distal-less homeobox 3                                                                                        |
| 0,347720493 | 0,00825 | 0,710546022 | 0,00684 | DMKN         | dermokine                                                                                                     |
| 1,500038989 | 0,00585 | 1,702907415 | 0       | DNAAF1       | dynein, axonemal, assembly factor 1                                                                           |
| 1,219255094 | 0,03156 | 1,245737416 | 0,00117 | DNAH1        | dynein, axonemal, heavy chain 1                                                                               |
| 1,269270886 | 0,03474 | 1,172834949 | 0,00377 | DNAH7        | dynein, axonemal, heavy chain 7                                                                               |
| 0,612168196 | 0,00691 | 0,594191553 | 0,00006 | DNAJA4       | DnaJ (Hsp40) homolog, subfamily A, member 4                                                                   |
| 0,630688704 | 0,00037 | 0,681129017 | 0       | DNAJA4       | DnaJ (Hsp40) homolog, subfamily A, member 4                                                                   |
| 0,562919293 | 0,00245 | 0,71400199  | 0,00009 | DNAJA4       | DnaJ (Hsp40) homolog, subfamily A, member 4                                                                   |
| 0,579547976 | 0,00156 | 0,728499557 | 0,00299 | DNAJB6       | DnaJ (Hsp40) homolog, subfamily B, member 6                                                                   |
| 2,561519723 | 0,00665 | 1,543280175 | 0,00159 | DNAJB9       | DnaJ (Hsp40) homolog, subfamily B, member 9                                                                   |
| 2,360348687 | 0,00019 | 1,642621402 | 0,00117 | DNAJB9       | DnaJ (Hsp40) homolog, subfamily B, member 9                                                                   |
| 2,575763259 | 0,00176 | 1,684125907 | 0,00261 | DNAJB9       | DnaJ (Hsp40) homolog, subfamily B, member 9                                                                   |
| 0,62546454  | 0,02283 | 0,802737389 | 0,0055  | DNAJC13      | DnaJ (Hsp40) homolog, subfamily C, member 13                                                                  |
| 0,796088099 | 0,03264 | 0,876605721 | 0,03975 | DNAJC19      | DnaJ (Hsp40) homolog, subfamily C, member 19                                                                  |
| 0,608783009 | 0,02802 | 0,765778999 | 0,00001 | DNAJC9       | DnaJ (Hsp40) homolog, subfamily C, member 9                                                                   |
| 0,683493726 | 0,01368 | 0,81056512  | 0,00061 | DNAJC9       | DnaJ (Hsp40) homolog, subfamily C, member 9                                                                   |
| 1,271913007 | 0,03366 | 1,234562607 | 0,00151 | DNASE1       | deoxyribonuclease I                                                                                           |
| 1,393777239 | 0,0248  | 1,171210181 | 0,00727 | DNMT3A       | DNA (cytosine-5-)-methyltransferase 3 alpha                                                                   |
| 0,551334582 | 0,00584 | 0,749499801 | 0       | DNTTIP2      | deoxynucleotidyltransferase, terminal, interacting protein 2                                                  |
| 2,108182847 | 0,00034 | 1,79129134  | 0,0003  | DOCK2        | dedicator of cytokinesis 2                                                                                    |
| 1,823866331 | 0,02114 | 1,258757174 | 0,03226 | DOCK4        | dedicator of cytokinesis 4                                                                                    |
| 1,811267966 | 0,00705 | 1,39377239  | 0,0262  | DOCK8        | dedicator of cytokinesis 8                                                                                    |
| 1,359428242 | 0,04022 | 1,367935304 | 0,00054 | DOK3         | docking protein 3                                                                                             |
| 2,696335463 | 0       | 1,902636553 | 0,00011 | DOK3         | docking protein 3                                                                                             |
| 0,61813763  | 0,00972 | 0,683967652 | 0,00069 | DOK4         | docking protein 4                                                                                             |
| 1,780151467 | 0,00069 | 1,296839555 | 0,00338 | DOK5         | docking protein 5                                                                                             |
| 1,395710764 | 0,00147 | 1,159899655 | 0,01122 | DPAGT1       | dolichyl-phosphate (UDP-N-acetylglucosamine) N-acetylglucosaminophosphotransferase 1 (GlcNAc-1-P transferase) |
| 1,476314406 | 0,00028 | 1,244011653 | 0,0012  | DPEP2        | dipeptidase 2                                                                                                 |
| 1,298638603 | 0,0135  | 1,306765254 | 0,00581 | DPP6         | dipeptidyl-peptidase 6                                                                                        |
| 0,748980467 | 0,01718 | 0,851453708 | 0,02141 | DPP8         | dipeptidyl-peptidase 8                                                                                        |
| 0,716480825 | 0,00202 | 0,86937564  | 0,03099 | DPY30        | dpy-30 homolog (C. elegans)                                                                                   |
| 1,463071221 | 0,02401 | 1,277213759 | 0,00002 | DRAM1        | DNA-damage regulated autophagy modulator 1                                                                    |
| 0,828744904 | 0,04006 | 0,886996305 | 0,01777 | DRG1         | developmentally regulated GTP binding protein 1                                                               |
| 0,100203166 | 0,0001  | 0,408667664 | 0,00384 | DSC1         | desmocollin 1                                                                                                 |
| 0,385820044 | 0,00992 | 0,430176315 | 0       | DSC2         | desmocollin 2                                                                                                 |
| 0,459138081 | 0,00042 | 0,594191553 | 0,00496 | DSC2         | desmocollin 2                                                                                                 |
| 0,548665969 | 0,0075  | 0,688725023 | 0,00015 | DSC2         | desmocollin 2                                                                                                 |
| 0,429878243 | 0,00205 | 0,618566239 | 0,00002 | DSC3         | desmocollin 3                                                                                                 |
| 0,386087567 | 0,00005 | 0,644387315 | 0,00328 | DSC3         | desmocollin 3                                                                                                 |
| 0,348927691 | 0,0041  | 0,462331639 | 0,00067 | DSG1         | desmoglein 1                                                                                                  |
| 0,419284092 | 0,01558 | 0,713012859 | 0,01093 | DSG3         | desmoglein 3                                                                                                  |
| 0,569591689 | 0,00336 | 0,699308041 | 0,00021 | DSG3         | desmoglein 3                                                                                                  |
| 0,754712984 | 0,02038 | 0,856188285 | 0,03018 | DSP          | desmoplakin                                                                                                   |
| 0,426613049 | 0,00057 | 0,725797914 | 0,00461 | DST          | dystonin                                                                                                      |
| 0,576742803 | 0,02847 | 0,741747467 | 0,00797 | DSTN         | destrin (actin depolymerizing factor)                                                                         |
| 0,697855382 | 0,02733 | 0,714992493 | 0,00003 | DSTN         | destrin (actin depolymerizing factor)                                                                         |
| 0,63860688  | 0,01512 | 0,819036698 | 0,02718 | DSTYK        | dual serine/threonine and tyrosine protein kinase                                                             |
| 0,679243142 | 0,00488 | 0,756808396 | 0,00074 | DTD1         | D-tyrosyl-tRNA deacylase 1 homolog (S. cerevisiae)                                                            |

|             |         |             |         |          |                                                                          |
|-------------|---------|-------------|---------|----------|--------------------------------------------------------------------------|
| 3,431882122 | 0,00006 | 2,350552657 | 0,00004 | DTNB     | dystrobrevin, beta                                                       |
| 0,404160434 | 0,00176 | 0,633317127 | 0,00001 | DUOX1    | dual oxidase 1                                                           |
| 0,462011286 | 0,02784 | 0,763658749 | 0,0058  | DUOX1    | dual oxidase 1                                                           |
| 0,532185091 | 0,0051  | 0,681601304 | 0,00132 | DUOXA1   | dual oxidase maturation factor 1                                         |
| 0,535886731 | 0,02629 | 0,806082831 | 0,04664 | DUOXA1   | dual oxidase maturation factor 1                                         |
| 1,476314406 | 0,0271  | 1,325007017 | 0,0187  | DUOXA2   | dual oxidase maturation factor 2                                         |
| 0,78132788  | 0,02542 | 0,665725807 | 0,00021 | DUS4L    | dihydrouridine synthase 4-like (S. cerevisiae)                           |
| 1,344434994 | 0,00829 | 1,353786279 | 0,00055 | DUSP1    | dual specificity phosphatase 1                                           |
| 0,621144141 | 0,00457 | 0,647521499 | 0,00036 | DUSP14   | dual specificity phosphatase 14                                          |
| 0,786762445 | 0,02027 | 0,792234811 | 0,0441  | DUSP16   | dual specificity phosphatase 16                                          |
| 0,713012859 | 0,00456 | 0,738157203 | 0,00063 | DUSP16   | dual specificity phosphatase 16                                          |
| 1,636938363 | 0,00533 | 1,362258035 | 0,0146  | DUSP2    | dual specificity phosphatase 2                                           |
| 1,470187336 | 0,00122 | 1,224336392 | 0,00317 | DUSP22   | dual specificity phosphatase 22                                          |
| 1,995845438 | 0,0065  | 1,589970502 | 0,00261 | DUSP5    | dual specificity phosphatase 5                                           |
| 0,646176415 | 0,00162 | 0,645281245 | 0       | DUSP7    | dual specificity phosphatase 7                                           |
| 0,705637922 | 0,02688 | 0,893785162 | 0,01533 | DYM      | dymeclin                                                                 |
| 0,608361179 | 0,04367 | 0,849096246 | 0,0175  | DYNC1H1  | dynein, cytoplasmic 1, heavy chain 1                                     |
| 0,698823486 | 0,04454 | 0,767373048 | 0,00115 | DYNC1I2  | dynein, cytoplasmic 1, intermediate chain 2                              |
| 0,513344773 | 0,00815 | 0,614719434 | 0       | DYNC1L1  | dynein, cytoplasmic 1, light intermediate chain 1                        |
| 0,561360711 | 0,00194 | 0,827023368 | 0,00122 | DYNC1L1  | dynein, cytoplasmic 1, light intermediate chain 1                        |
| 0,632878297 | 0,01149 | 0,790589117 | 0,00407 | DYNC1L2  | dynein, cytoplasmic 1, light intermediate chain 2                        |
| 0,670821112 | 0,03127 | 0,896888816 | 0,02209 | DYNC1L2  | dynein, cytoplasmic 1, light intermediate chain 2                        |
| 0,734584317 | 0,00914 | 0,807201075 | 0,00086 | DYNLL1   | dynein, light chain, LC8-type 1                                          |
| 0,470087101 | 0,00853 | 0,56097174  | 0,00003 | DYNLT3   | dynein, light chain, Tctex-type 3                                        |
| 1,197478705 | 0,01678 | 1,149494848 | 0,04598 | DYRK1A   | dual-specificity tyrosine-(Y)-phosphorylation regulated kinase 1A        |
| 0,728499557 | 0,00772 | 0,704172113 | 0,00084 | DYRK2    | dual-specificity tyrosine-(Y)-phosphorylation regulated kinase 2         |
| 1,409320755 | 0,02865 | 1,378405153 | 0,00006 | DYSF     | dysferlin, limb girdle muscular dystrophy 2B (autosomal recessive)       |
| 1,889494082 | 0,00049 | 1,22858698  | 0,03494 | E2F5     | E2F transcription factor 5, p130-binding                                 |
| 1,212512819 | 0,03093 | 1,121166078 | 0,02837 | E2F7     | E2F transcription factor 7                                               |
| 0,563309614 | 0,01766 | 0,537747195 | 0,00001 | EAF1     | ELL associated factor 1                                                  |
| 3,328794939 | 0,00002 | 2,217601287 | 0,00062 | EAF2     | ELL associated factor 2                                                  |
| 1,479387509 | 0,04782 | 1,306765254 | 0,02634 | EBF1     | early B-cell factor 1                                                    |
| 1,373636233 | 0,01367 | 1,241427492 | 0,00419 | EBF3     | early B-cell factor 3                                                    |
| 0,778624691 | 0,04377 | 0,721464343 | 0       | EBNA1BP2 | EBNA1 binding protein 2                                                  |
| 0,639492791 | 0,00026 | 0,732550437 | 0,00344 | EBP1     | emopamil binding protein-like                                            |
| 0,675487042 | 0,01257 | 0,847332435 | 0,00261 | ECD      | ecdysoneless homolog (Drosophila)                                        |
| 1,329607108 | 0,00784 | 1,246601194 | 0,00243 | ECE1     | endothelin converting enzyme 1                                           |
| 0,673150035 | 0,02721 | 0,85027416  | 0,04961 | ECHDC1   | enoyl CoA hydratase domain containing 1                                  |
| 1,531557997 | 0,00231 | 1,524144883 | 0,00029 | ECSCR    | endothelial cell-specific chemotaxis regulator                           |
| 1,483494934 | 0,03327 | 1,582274602 | 0,00003 | ECSCR    | endothelial cell-specific chemotaxis regulator                           |
| 1,32592576  | 0,01269 | 1,152686347 | 0,01816 | EDA2R    | ectodysplasin A2 receptor                                                |
| 1,448942155 | 0,00275 | 1,230291345 | 0,01242 | EDEM1    | ER degradation enhancer, mannosidase alpha-like 1                        |
| 0,426022048 | 0,00692 | 0,370616752 | 0       | EEA1     | early endosome antigen 1                                                 |
| 0,622005827 | 0,03375 | 0,846158597 | 0,00495 | EEF1B2   | eukaryotic translation elongation factor 1 beta 2                        |
| 0,693034943 | 0,00009 | 0,758383773 | 0,00134 | EEF2K    | eukaryotic elongation factor-2 kinase                                    |
| 0,68491649  | 0,02663 | 0,773782497 | 0,00221 | EEF2K    | eukaryotic elongation factor-2 kinase                                    |
| 1,185914499 | 0,02924 | 1,101141598 | 0,02842 | EEP2D    | endonuclease/exonuclease/phosphatase family domain containing 1          |
| 1,50733491  | 0,00231 | 1,271031689 | 0,01406 | EFCAB4B  | EF-hand calcium binding domain 4B                                        |
| 1,413233644 | 0,01186 | 1,286989247 | 0,01209 | EFEMP2   | EGF containing fibulin-like extracellular matrix protein 2               |
| 1,372684431 | 0,01089 | 1,209155676 | 0,04138 | EFHD2    | EF-hand domain family, member D2                                         |
| 0,73153561  | 0,00072 | 0,882091365 | 0,04714 | EFNA1    | ephrin-A1                                                                |
| 0,573553512 | 0,00111 | 0,732550437 | 0,00103 | EFNA3    | ephrin-A3                                                                |
| 0,692074858 | 0,00327 | 0,814507563 | 0,01253 | EFNA4    | ephrin-A4                                                                |
| 0,749499801 | 0,01825 | 0,849684999 | 0,00512 | EFNA5    | ephrin-A5                                                                |
| 0,616853585 | 0,00478 | 0,727490342 | 0,0065  | EFNA5    | ephrin-A5                                                                |
| 0,52304247  | 0,00012 | 0,5913155   | 0,00008 | EF5      | embryonal Fyn-associated substrate                                       |
| 0,602486157 | 0,02148 | 0,837406488 | 0,00326 | EFTUD1   | elongation factor Tu GTP binding domain containing 1                     |
| 1,945309895 | 0,02447 | 1,975201723 | 0,0002  | EGFL6    | EGF-like-domain, multiple 6                                              |
| 1,370782805 | 0,00504 | 1,29145735  | 0,00597 | EGFLAM   | EGF-like, fibronectin type III and laminin G domains                     |
| 0,706616822 | 0,00346 | 0,773782497 | 0,00335 | EGFR     | epidermal growth factor receptor                                         |
| 0,477641468 | 0,00211 | 0,66296288  | 0,00002 | EGFR     | epidermal growth factor receptor                                         |
| 0,698823486 | 0,04646 | 0,798298386 | 0,01838 | EGLN1    | egl nine homolog 1 (C. elegans)                                          |
| 0,581963267 | 0,03483 | 0,743291492 | 0,00027 | EHBP1    | EH domain binding protein 1                                              |
| 0,709561678 | 0,00513 | 0,751580739 | 0,00001 | EI2A     | etoposide induced 2.4 mRNA                                               |
| 0,708578698 | 0,01465 | 0,840896415 | 0,00727 | EI2A     | etoposide induced 2.4 mRNA                                               |
| 0,601234624 | 0,01828 | 0,613867842 | 0,00002 | EIF1AX   | eukaryotic translation initiation factor 1A, X-linked                    |
| 0,658383461 | 0,01985 | 0,717474767 | 0,00032 | EIF3A    | eukaryotic translation initiation factor 3, subunit A                    |
| 0,66158572  | 0,03729 | 0,877821798 | 0,00602 | EIF3H    | eukaryotic translation initiation factor 3, subunit H                    |
| 0,657927263 | 0,02302 | 0,608361179 | 0,00004 | EIF3J    | eukaryotic translation initiation factor 3, subunit J                    |
| 0,716480825 | 0,01896 | 0,745872013 | 0,00002 | EIF3J    | eukaryotic translation initiation factor 3, subunit J                    |
| 0,62546454  | 0,00975 | 0,750539549 | 0,00001 | EIF3M    | eukaryotic translation initiation factor 3, subunit M                    |
| 0,78132788  | 0,02837 | 0,87539133  | 0,04225 | EIF4A3   | eukaryotic translation initiation factor 4A3                             |
| 0,757858283 | 0,00562 | 0,897510051 | 0,01242 | EIF4EBP2 | eukaryotic translation initiation factor 4E binding protein 2            |
| 0,664342907 | 0,01589 | 0,699308041 | 0,00001 | EIF5     | eukaryotic translation initiation factor 5                               |
| 0,672217497 | 0,00547 | 0,810003474 | 0,01177 | EIF5     | eukaryotic translation initiation factor 5                               |
| 0,559806444 | 0,01682 | 0,771105413 | 0,00001 | EIF5B    | eukaryotic translation initiation factor 5B                              |
| 1,698192493 | 0,02954 | 1,362258035 | 0,0206  | ELF3     | E74-like factor 3 (ets domain transcription factor, epithelial-specific) |
| 0,410370804 | 0,0044  | 0,546767729 | 0,00328 | ELF5     | E74-like factor 5 (ets domain transcription factor)                      |
| 1,350037985 | 0,03593 | 1,30224419  | 0,00764 | ELK3     | ELK3, ETS-domain protein (SRF accessory protein 2)                       |
| 1,338855257 | 0,02262 | 1,263127262 | 0,00022 | ELL      | elongation factor RNA polymerase II                                      |
| 1,893427262 | 0,00118 | 1,719512972 | 0,00004 | ELMO1    | engulfment and cell motility 1                                           |
| 1,274560627 | 0,00347 | 1,275444392 | 0,00169 | ELMO2    | engulfment and cell motility 2                                           |
| 0,787307977 | 0,04779 | 0,863938187 | 0,03518 | ELMO2    | engulfment and cell motility 2                                           |
| 0,643940815 | 0,01086 | 0,795536484 | 0,04724 | ELMO3    | engulfment and cell motility 3                                           |
| 0,398320048 | 0,02163 | 0,541487523 | 0,00868 | ELMOD1   | ELMO/CED-12 domain containing 1                                          |
| 0,782954296 | 0,04796 | 0,879039561 | 0,00842 | ELMOD2   | ELMO/CED-12 domain containing 2                                          |
| 1,212512819 | 0,0413  | 1,330529041 | 0,00005 | ELMOD3   | ELMO/CED-12 domain containing 3                                          |
| 0,583983697 | 0,00126 | 0,756283999 | 0,00031 | ELOVL1   | ELOVL fatty acid elongase 1                                              |
| 1,913216316 | 0,00864 | 1,361314116 | 0,00551 | ELOVL2   | ELOVL fatty acid elongase 2                                              |
| 0,291587342 | 0,00271 | 0,441045683 | 0,00001 | ELOVL4   | ELOVL fatty acid elongase 4                                              |
| 0,71400199  | 0,03614 | 0,695440986 | 0,00003 | ELOVL6   | ELOVL fatty acid elongase 6                                              |
| 0,508035071 | 0,03473 | 0,636397468 | 0,00051 | ELOVL7   | ELOVL fatty acid elongase 7                                              |
| 0,678302164 | 0,0131  | 0,774319028 | 0,00032 | ELP2     | elongation protein 2 homolog (S. cerevisiae)                             |
| 1,813780658 | 0,00471 | 1,678299274 | 0,00002 | ELTD1    | EGF, latrophilin and seven transmembrane domain containing 1             |
| 1,459020344 | 0,00813 | 1,439931319 | 0,00118 | EMCN     | endomucin                                                                |
| 1,490710387 | 0,01642 | 1,466116757 | 0,00003 | EMILIN2  | elastin microfibril interfacier 2                                        |
| 0,522317881 | 0,00101 | 0,743291492 | 0,00258 | EML1     | echinoderm microtubule associated protein like 1                         |
| 0,71400199  | 0,03305 | 0,869947353 | 0,02489 | EML4     | echinoderm microtubule associated protein like 4                         |

|             |         |             |         |              |                                                                                                                                 |
|-------------|---------|-------------|---------|--------------|---------------------------------------------------------------------------------------------------------------------------------|
| 0,67877249  | 0,02739 | 0,85027416  | 0,01148 | EMP2         | epithelial membrane protein 2                                                                                                   |
| 1,909242028 | 0       | 1,421092043 | 0,01799 | EMR2         | egf-like module containing, mucin-like, hormone receptor-like 2                                                                 |
| 0,52268005  | 0,01836 | 0,711038705 | 0,00061 | ENAH         | enabled homolog (Drosophila)                                                                                                    |
| 0,636397468 | 0,00278 | 0,704172113 | 0,00057 | ENAH         | enabled homolog (Drosophila)                                                                                                    |
| 0,656105627 | 0,02551 | 0,795536484 | 0,00089 | ENAH         | enabled homolog (Drosophila)                                                                                                    |
| 0,680185426 | 0,00109 | 0,763129604 | 0,01193 | ENDOD1       | endonuclease domain containing 1                                                                                                |
| 0,556710809 | 0,01035 | 0,727994774 | 0,00021 | ENDOD1       | endonuclease domain containing 1                                                                                                |
| 0,35013908  | 0,00004 | 0,519429552 | 0,00032 | ENDOU        | endonuclease, polyU-specific                                                                                                    |
| 1,630144665 | 0,0449  | 1,644900137 | 0,00062 | ENG          | endoglin                                                                                                                        |
| 1,742308384 | 0,01019 | 1,593280193 | 0,00088 | ENO2         | enolase 2 (gamma, neuronal)                                                                                                     |
| 0,586824089 | 0,00715 | 0,74277646  | 0,00069 | ENOSF1       | enolase superfamily member 1                                                                                                    |
| 0,659296807 | 0,00307 | 0,773246337 | 0,00458 | ENOSF1       | enolase superfamily member 1                                                                                                    |
| 1,968368044 | 0,019   | 1,663244197 | 0,00611 | ENPEP        | glutamyl aminopeptidase (aminopeptidase A)                                                                                      |
| 1,2397077   | 0,02903 | 0,8962667   | 0,03718 | ENPP1        | ectonucleotide pyrophosphatase/phosphodiesterase 1                                                                              |
| 2,74156561  | 0,00044 | 2,105262309 | 0,00017 | ENPP2        | ectonucleotide pyrophosphatase/phosphodiesterase 2                                                                              |
| 2           | 0,0036  | 1,818816504 | 0,00026 | ENPP2        | ectonucleotide pyrophosphatase/phosphodiesterase 2                                                                              |
| 2,128740365 | 0,00258 | 1,244011653 | 0,03175 | ENPP4        | ectonucleotide pyrophosphatase/phosphodiesterase 4 (putative)                                                                   |
| 0,630251696 | 0,00011 | 0,771105413 | 0,00531 | ENSA         | endosulfine alpha                                                                                                               |
| 0,721964598 | 0,00784 | 0,737134609 | 0,04169 | ENSA         | endosulfine alpha                                                                                                               |
| 0,685391402 | 0,00043 | 0,748980467 | 0,00004 | ENSA         | endosulfine alpha                                                                                                               |
| 2,273633946 | 0,00103 | 2,082043195 | 0,00001 | ENTPD1       | ectonucleoside triphosphate diphosphohydrolase 1                                                                                |
| 1,592176198 | 0,00028 | 1,558329159 | 0,00017 | ENTPD1       | ectonucleoside triphosphate diphosphohydrolase 1                                                                                |
| 2,156960863 | 0,00443 | 2,122846418 | 0,00003 | ENTPD1       | ectonucleoside triphosphate diphosphohydrolase 1                                                                                |
| 1,93053405  | 0,00257 | 1,384149716 | 0,00547 | ENTPD1       | ectonucleoside triphosphate diphosphohydrolase 1                                                                                |
| 0,78132788  | 0,03528 | 0,860949188 | 0,0461  | ENV2         | enhancer of yellow 2 homolog (Drosophila)                                                                                       |
| 1,473247686 | 0,00397 | 1,394743666 | 0,00427 | EOMES        | eomesodermin                                                                                                                    |
| 0,649769531 | 0,02924 | 0,768970416 | 0,00229 | EP300        | E1A binding protein p300                                                                                                        |
| 0,67689314  | 0,00533 | 0,833931044 | 0,00885 | EPB41        | erythrocyte membrane protein band 4.1 (elliptocytosis 1, RH-linked)                                                             |
| 0,640823962 | 0,01989 | 0,745872013 | 0,00221 | EPB41L4A-AS1 | EPB41L4A antisense RNA 1 (non-protein coding)                                                                                   |
| 0,352818961 | 0,00422 | 0,499307333 | 0,00025 | EPB41L4B     | erythrocyte membrane protein band 4.1 like 4B                                                                                   |
| 0,355519353 | 0       | 0,52595089  | 0,00001 | EPB41L4B     | erythrocyte membrane protein band 4.1 like 4B                                                                                   |
| 0,42720487  | 0,00366 | 0,532185091 | 0       | EPCAM        | epithelial cell adhesion molecule                                                                                               |
| 1,863480859 | 0,00062 | 1,582274602 | 0,00127 | EPDR1        | ependymin related protein 1 (zebrafish)                                                                                         |
| 1,300440147 | 0,02009 | 1,272794935 | 0,00586 | EPHA8        | EPH receptor A8                                                                                                                 |
| 0,508739846 | 0,02139 | 0,770571108 | 0,00647 | EPHX2        | epoxide hydrolase 2, cytoplasmic                                                                                                |
| 0,373194596 | 0,00158 | 0,610473256 | 0,0003  | EPHX3        | epoxide hydrolase 3                                                                                                             |
| 1,307671349 | 0,01892 | 1,316766922 | 0,00002 | EPM2A        | epilepsy, progressive myoclonus type 2A, Lafora disease (laforin)                                                               |
| 0,780786493 | 0,00776 | 0,824162085 | 0,01669 | EPN2         | epsin 2                                                                                                                         |
| 0,601234624 | 0,00037 | 0,765248385 | 0,00572 | EPN3         | epsin 3                                                                                                                         |
| 0,462011286 | 0,00002 | 0,565657231 | 0       | EPN3         | epsin 3                                                                                                                         |
| 1,310393404 | 0,00779 | 1,23370717  | 0,00117 | EPOR         | erythropoietin receptor                                                                                                         |
| 1,276328769 | 0,00453 | 1,158292806 | 0,00679 | EPOR         | erythropoietin receptor                                                                                                         |
| 1,543280175 | 0,00933 | 1,547564994 | 0,00027 | EPOR         | erythropoietin receptor                                                                                                         |
| 0,529609167 | 0,00041 | 0,714992493 | 0,0047  | EPPK1        | epiplakin 1                                                                                                                     |
| 0,325335464 | 0,00004 | 0,461051559 | 0,00009 | EPPK1        | epiplakin 1                                                                                                                     |
| 0,370103325 | 0,00058 | 0,518709968 | 0,00003 | EPPK1        | epiplakin 1                                                                                                                     |
| 0,614719434 | 0,01353 | 0,710053679 | 0,00009 | EPPK1        | epiplakin 1                                                                                                                     |
| 0,773782497 | 0,00531 | 0,834509281 | 0,00383 | EPS15L1      | epidermal growth factor receptor pathway substrate 15-like 1                                                                    |
| 0,670821112 | 0,02591 | 0,801069878 | 0,00076 | EPT1         | ethanolaminephosphotransferase 1 (CDP-ethanolamine-specific)                                                                    |
| 1,417157397 | 0,006   | 1,202469249 | 0,0043  | EPX          | eosinophil peroxidase                                                                                                           |
| 1,548638056 | 0,03833 | 1,22010051  | 0,03935 | ERAP2        | endoplasmic reticulum aminopeptidase 2                                                                                          |
| 0,592546385 | 0,00143 | 0,825877665 | 0,02997 | ERBB2        | v-erb-b2 erythroblastic leukemia viral oncogene homolog 2, neuro/glioblastoma derived oncogene homolog (avian)                  |
| 0,485653748 | 0,003   | 0,677362489 | 0,0005  | ERBB3        | v-erb-b2 erythroblastic leukemia viral oncogene homolog 3 (avian)                                                               |
| 0,550570799 | 0,012   | 0,74277646  | 0,00242 | ERBB3        | v-erb-b2 erythroblastic leukemia viral oncogene homolog 3 (avian)                                                               |
| 0,738157203 | 0,02333 | 0,788400174 | 0,00381 | ERCC1        | excision repair cross-complementing rodent repair deficiency, complementation group 1 (includes overlapping antisense sequence) |
| 0,592135806 | 0,03136 | 0,835087919 | 0,00149 | ERCC5        | excision repair cross-complementing rodent repair deficiency, complementation group 5                                           |
| 0,468136124 | 0,03714 | 0,491069798 | 0,00183 | EREG         | epiregulin                                                                                                                      |
| 2,008335086 | 0,00108 | 1,70054832  | 0,00001 | ERLEC1       | endoplasmic reticulum lectin 1                                                                                                  |
| 1,93053405  | 0,00023 | 1,605474777 | 0,00022 | ERLEC1       | endoplasmic reticulum lectin 1                                                                                                  |
| 0,720964436 | 0,02711 | 0,783497187 | 0,00067 | ERMAP        | erythroblast membrane-associated protein (Scianna blood group)                                                                  |
| 1,787570325 | 0,00087 | 1,398616083 | 0,00066 | ERO1LB       | ERO1-like beta (S. cerevisiae)                                                                                                  |
| 1,262252032 | 0,04636 | 1,216722359 | 0,00501 | ERVW-1       | endogenous retrovirus group W, member 1                                                                                         |
| 1,509425969 | 0,01646 | 1,344434994 | 0,0143  | ESAM         | endothelial cell adhesion molecule                                                                                              |
| 0,667111585 | 0,03849 | 0,677362489 | 0,00087 | ESCO1        | establishment of cohesion 1 homolog 1 (S. cerevisiae)                                                                           |
| 0,748461493 | 0,02628 | 0,859756486 | 0,0041  | ESD          | esterase D                                                                                                                      |
| 0,515484159 | 0,02106 | 0,587638164 | 0,00004 | ESF1         | ESF1, nucleolar pre-rRNA processing protein, homolog (S. cerevisiae)                                                            |
| 1,918528239 | 0,00267 | 1,456999114 | 0,00013 | ESR1         | estrogen receptor 1                                                                                                             |
| 0,525222272 | 0,00175 | 0,670821112 | 0,00214 | ESRP1        | epithelial splicing regulatory protein 1                                                                                        |
| 0,454704126 | 0,00728 | 0,60667678  | 0       | ESRP1        | epithelial splicing regulatory protein 1                                                                                        |
| 0,627201102 | 0,00437 | 0,773782497 | 0,00017 | ESRP2        | epithelial splicing regulatory protein 2                                                                                        |
| 0,554016174 | 0,0037  | 0,765778999 | 0,00038 | ESRP2        | epithelial splicing regulatory protein 2                                                                                        |
| 0,718470088 | 0,04511 | 0,782954296 | 0,00005 | ESYT2        | extended synaptotagmin-like protein 2                                                                                           |
| 0,566049451 | 0,02774 | 0,664803554 | 0,00465 | ESYT3        | extended synaptotagmin-like protein 3                                                                                           |
| 0,580754366 | 0,0082  | 0,752623374 | 0,02581 | ESYT3        | extended synaptotagmin-like protein 3                                                                                           |
| 0,596667872 | 0,00245 | 0,755759964 | 0,00006 | ETF1         | eukaryotic translation termination factor 1                                                                                     |
| 0,637722196 | 0,01264 | 0,668037039 | 0,00019 | ETFDH        | electron-transferring-flavoprotein dehydrogenase                                                                                |
| 0,687294348 | 0,01317 | 0,712025098 | 0,00234 | ETFDH        | electron-transferring-flavoprotein dehydrogenase                                                                                |
| 1,411275843 | 0,01814 | 1,483494934 | 0,02516 | ETS1         | v-ets erythroblastosis virus E26 oncogene homolog 1 (avian)                                                                     |
| 0,784040454 | 0,04939 | 0,838568184 | 0,04807 | ETS2         | v-ets erythroblastosis virus E26 oncogene homolog 2 (avian)                                                                     |
| 0,622437118 | 0,0309  | 0,685866644 | 0,00039 | ETV3         | ets variant 3                                                                                                                   |
| 1,360370852 | 0,00238 | 1,192508872 | 0,02715 | ETV5         | ets variant 5                                                                                                                   |
| 2,360348687 | 0,00179 | 1,649467097 | 0,00101 | EV12A        | ecotropic viral integration site 2A                                                                                             |
| 2,804998501 | 0,00016 | 2,396618043 | 0,00003 | EV12B        | ecotropic viral integration site 2B                                                                                             |
| 0,448133335 | 0,01827 | 0,726482525 | 0,00738 | EVPL         | envoplakin                                                                                                                      |
| 0,709070018 | 0,00583 | 0,773782497 | 0,00203 | EVPLL        | envoplakin-like                                                                                                                 |
| 0,687770909 | 0,02764 | 0,70514898  | 0,00012 | EXOC3        | exocyst complex component 3                                                                                                     |
| 1,642621402 | 0,00303 | 1,182631    | 0,01199 | EXOC6        | exocyst complex component 6                                                                                                     |
| 0,712025098 | 0,01948 | 0,732042848 | 0,00004 | EXOSC1       | exosome component 1                                                                                                             |
| 0,685866644 | 0,02985 | 0,835666959 | 0,00215 | EXOSC10      | exosome component 10                                                                                                            |
| 0,741747467 | 0,00135 | 0,738157203 | 0,01302 | EXOSC3       | exosome component 3                                                                                                             |
| 0,605416542 | 0,00249 | 0,825877665 | 0,01799 | EXOSC7       | exosome component 7                                                                                                             |
| 0,679243142 | 0,02674 | 0,798298386 | 0,00004 | EXOSC8       | exosome component 8                                                                                                             |
| 0,810003474 | 0,01466 | 0,882091365 | 0,00644 | EXOSC9       | exosome component 9                                                                                                             |
| 0,274523203 | 0,00322 | 0,412652704 | 0,00001 | EXPH5        | exophilin 5                                                                                                                     |
| 0,391205891 | 0,01462 | 0,492774668 | 0,00006 | EXPH5        | exophilin 5                                                                                                                     |
| 0,757333158 | 0,0217  | 0,866937564 | 0,00753 | EZR          | ezrin                                                                                                                           |
| 0,804408371 | 0,04802 | 0,894404902 | 0,01681 | F11R         | F11 receptor                                                                                                                    |
| 0,765248385 | 0,0117  | 0,772175133 | 0,00052 | F12          | coagulation factor XII (Hageman factor)                                                                                         |

|             |         |             |         |          |                                                                             |
|-------------|---------|-------------|---------|----------|-----------------------------------------------------------------------------|
| 1,511519928 | 0,01771 | 1,506290467 | 0,00011 | F13A1    | coagulation factor XIII, A1 polypeptide                                     |
| 0,538493188 | 0,01598 | 0,737134609 | 0,01142 | F2RL1    | coagulation factor II (thrombin) receptor-like 1                            |
| 0,460412849 | 0,00106 | 0,501388218 |         | F2RL1    | coagulation factor II (thrombin) receptor-like 1                            |
| 0,678302164 | 0,03557 | 0,586824089 | 0,00158 | F3       | coagulation factor III (thromboplastin, tissue factor)                      |
| 1,525201653 | 0,00015 | 1,516767545 | 0,00059 | FA2H     | fatty acid 2-hydroxylase                                                    |
| 4,750238664 | 0,00117 | 2,489748471 | 0,00002 | FABP4    | fatty acid binding protein 4, adipocyte                                     |
| 0,65747138  | 0,00214 | 0,876605721 | 0,01186 | FABP5    | fatty acid binding protein 5 (psoriasis-associated)                         |
| 1,273677475 | 0,02242 | 1,151887642 | 0,01756 | FABP7    | fatty acid binding protein 7, brain                                         |
| 1,248330549 | 0,03684 | 1,305859787 | 0,00013 | FADS1    | fatty acid desaturase 1                                                     |
| 1,315854525 | 0,01844 | 1,164733586 | 0,04038 | FADS3    | fatty acid desaturase 3                                                     |
| 0,689680461 | 0,03693 | 0,899378312 | 0,04352 | FAF1     | Fas (TNFRSF6) associated factor 1                                           |
| 0,596254436 | 0,00914 | 0,745355193 | 0,03771 | FAF1     | Fas (TNFRSF6) associated factor 1                                           |
| 0,428688018 | 0,00032 | 0,673616788 | 0,00059 | FAHD1    | fumarylacetoacetate hydrolase domain containing 1                           |
| 1,297738767 | 0,01231 | 1,252664439 | 0,01236 | FAHD2A   | fumarylacetoacetate hydrolase domain containing 2A                          |
| 0,677832163 | 0,01247 | 0,625898229 | 0,00011 | FAIM     | Fas apoptotic inhibitory molecule                                           |
| 1,892215293 | 0,00037 | 1,620006947 | 0,00223 | FAIM3    | Fas apoptotic inhibitory molecule 3                                         |
| 1,496922987 | 0,00256 | 1,423063461 | 0,00002 | FAIM3    | Fas apoptotic inhibitory molecule 3                                         |
| 1,646040691 | 0,00844 | 1,351910833 | 0,00628 | FAM101B  | family with sequence similarity 101, member B                               |
| 1,341642225 | 0,02315 | 1,138394029 | 0,02778 | FAM105A  | family with sequence similarity 105, member A                               |
| 0,67877249  | 0,01735 | 0,837406488 | 0,00069 | FAM105B  | family with sequence similarity 105, member B                               |
| 1,822602561 | 0,00106 | 1,299539062 | 0,00675 | FAM107B  | family with sequence similarity 107, member B                               |
| 2,515769944 | 0,01673 | 1,30224419  | 0,03018 | FAM107B  | family with sequence similarity 107, member B                               |
| 0,651122095 | 0,04335 | 0,697371833 | 0,00013 | FAM108B1 | family with sequence similarity 108, member B1                              |
| 0,7944344   | 0,04678 | 0,77271055  | 0,02297 | FAM108C1 | family with sequence similarity 108, member C1                              |
| 1,554014538 | 0,00615 | 1,344434994 | 0,00077 | FAM110B  | family with sequence similarity 110, member B                               |
| 0,505225723 | 0,01951 | 0,613867842 | 0,00003 | FAM110C  | family with sequence similarity 110, member C                               |
| 0,79940583  | 0,0195  | 0,86934456  | 0,00416 | FAM111B  | family with sequence similarity 111, member B                               |
| 2,171963713 | 0,00017 | 1,729074463 | 0,00004 | FAM113B  | family with sequence similarity 113, member B                               |
| 0,534402996 | 0,00241 | 0,689680461 | 0,00067 | FAM114A1 | family with sequence similarity 114, member A1                              |
| 1,342572503 | 0,03906 | 1,284315809 | 0,00396 | FAM116B  | family with sequence similarity 116, member B                               |
| 1,770307529 | 0,00201 | 1,397646972 | 0,00106 | FAM116B  | family with sequence similarity 116, member B                               |
| 1,563739286 | 0,00172 | 1,435944511 | 0,00001 | FAM117A  | family with sequence similarity 117, member A                               |
| 1,528376521 | 0,03534 | 1,241427492 | 0,00235 | FAM123A  | family with sequence similarity 123A                                        |
| 1,243149669 | 0,03106 | 1,221793102 | 0,00605 | FAM124A  | family with sequence similarity 124A                                        |
| 1,28877463  | 0,00873 | 1,17609125  | 0,0098  | FAM124B  | family with sequence similarity 124B                                        |
| 0,656560563 | 0,04805 | 0,633317127 | 0,00013 | FAM129A  | family with sequence similarity 129, member A                               |
| 0,749499801 | 0,03246 | 0,753667455 | 0,00132 | FAM129A  | family with sequence similarity 129, member A                               |
| 0,74277646  | 0,00635 | 0,683967652 | 0,00003 | FAM131A  | family with sequence similarity 131, member A                               |
| 0,538866573 | 0,0154  | 0,581963267 | 0,00006 | FAM135A  | family with sequence similarity 135, member A                               |
| 1,226884977 | 0,0117  | 1,175276328 | 0,01199 | FAM155B  | family with sequence similarity 155, member B                               |
| 0,523768064 | 0,00008 | 0,664803554 | 0,00005 | FAM162A  | family with sequence similarity 162, member A                               |
| 0,452189689 | 0,00018 | 0,617709319 | 0,00002 | FAM162A  | family with sequence similarity 162, member A                               |
| 0,434371093 | 0,00012 | 0,602903914 | 0,00002 | FAM162A  | family with sequence similarity 162, member A                               |
| 1,807505454 | 0,00028 | 1,437936533 | 0,00262 | FAM162B  | family with sequence similarity 162, member B                               |
| 0,61985385  | 0,00075 | 0,827596816 | 0,00638 | FAM167A  | family with sequence similarity 167, member A                               |
| 1,329607108 | 0,00647 | 1,33422317  | 0,00033 | FAM167B  | family with sequence similarity 167, member B                               |
| 1,80625302  | 0,00007 | 1,53581027  | 0,00019 | FAM171A1 | family with sequence similarity 171, member A1                              |
| 0,698823486 | 0,02506 | 0,745355193 | 0,00282 | FAM172A  | family with sequence similarity 172, member A                               |
| 0,743806881 | 0,02781 | 0,740719899 | 0,00195 | FAM175A  | family with sequence similarity 175, member A                               |
| 0,756808396 | 0,04562 | 0,825305409 | 0,00198 | FAM175B  | family with sequence similarity 175, member B                               |
| 1,204137381 | 0,02692 | 1,330529041 | 0,00003 | FAM18B2  | family with sequence similarity 18, member B2                               |
| 0,615572207 | 0,00545 | 0,628942486 | 0,00092 | FAM190B  | family with sequence similarity 190, member B                               |
| 1,51887169  | 0,01431 | 1,575707772 | 0,01954 | FAM198B  | family with sequence similarity 198, member B                               |
| 1,677136369 | 0,01184 | 1,434949535 | 0,00968 | FAM198B  | family with sequence similarity 198, member B                               |
| 1,243149669 | 0,0126  | 1,156688184 | 0,01131 | FAM19A5  | family with sequence similarity 19 (chemokine (C-C motif)-like), member A5  |
| 0,753145233 | 0,00403 | 0,812252396 | 0,00065 | FAM200B  | family with sequence similarity 200, member B                               |
| 0,671286251 | 0,00483 | 0,840896415 | 0,00755 | FAM204A  | family with sequence similarity 204, member A                               |
| 0,672217497 | 0,01512 | 0,757333158 | 0,00047 | FAM206A  | family with sequence similarity 206, member A                               |
| 2,022304162 | 0,00008 | 1,835279765 | 0,00001 | FAM30A   | family with sequence similarity 30, member A                                |
| 0,665725807 | 0,00038 | 0,710053679 | 0,00006 | FAM36A   | family with sequence similarity 36, member A                                |
| 0,498270131 | 0,00172 | 0,627201102 | 0,0004  | FAM3B    | family with sequence similarity 3, member B                                 |
| 0,52268005  | 0,00668 | 0,725476104 | 0,00825 | FAM46B   | family with sequence similarity 46, member B                                |
| 3,879847641 | 0,00001 | 2,850075228 |         | FAM46C   | family with sequence similarity 46, member C                                |
| 4,141059695 | 0,00004 | 3,901421846 | 0,00008 | FAM46C   | family with sequence similarity 46, member C                                |
| 1,483494934 | 0,00055 | 1,214194884 | 0,03277 | FAM49A   | family with sequence similarity 49, member A                                |
| 1,859609885 | 0,01581 | 1,845484985 | 0,00047 | FAM55C   | family with sequence similarity 55, member C                                |
| 1,356604327 | 0,01778 | 1,349102534 | 0,0001  | FAM55C   | family with sequence similarity 55, member C                                |
| 2,177994031 | 0,00046 | 1,43097652  | 0,00669 | FAM55C   | family with sequence similarity 55, member C                                |
| 1,29145735  | 0,02452 | 1,344434994 | 0,00039 | FAM55D   | family with sequence similarity 55, member D                                |
| 0,391205891 | 0,00021 | 0,560583039 |         | FAM57A   | family with sequence similarity 57, member A                                |
| 0,53998828  | 0,0068  | 0,624598063 | 0,00004 | FAM59A   | family with sequence similarity 59, member A                                |
| 0,534402996 | 0,00206 | 0,573553512 |         | FAM59A   | family with sequence similarity 59, member A                                |
| 0,602068691 | 0,02496 | 0,670821112 | 0,00041 | FAM59A   | family with sequence similarity 59, member A                                |
| 1,911890635 | 0,00014 | 1,327765158 | 0,00384 | FAM65B   | family with sequence similarity 65, member B                                |
| 1,994462503 | 0,01439 | 1,363202607 | 0,04475 | FAM65B   | family with sequence similarity 65, member B                                |
| 1,805001455 | 0,00212 | 1,467133344 | 0,00097 | FAM65C   | family with sequence similarity 65, member C                                |
| 1,497960934 | 0,00938 | 1,189207115 | 0,0233  | FAM78A   | family with sequence similarity 78, member A                                |
| 0,516557194 | 0,00256 | 0,662044455 | 0,02843 | FAM83B   | family with sequence similarity 83, member B                                |
| 0,328280281 | 0,00022 | 0,462011286 |         | FAM83C   | family with sequence similarity 83, member C                                |
| 0,484980955 | 0,00109 | 0,55632506  | 0,00025 | FAM83C   | family with sequence similarity 83, member C                                |
| 0,577142709 | 0,0023  | 0,669891801 | 0,0006  | FAM83G   | family with sequence similarity 83, member G                                |
| 0,517273791 | 0,02745 | 0,660669203 | 0,0003  | FAM84A   | family with sequence similarity 84, member A                                |
| 0,577142709 | 0,00029 | 0,757858283 | 0,00092 | FAM85A   | family with sequence similarity 85, member A                                |
| 0,63860688  | 0,01188 | 0,715984371 | 0,00021 | FAM89A   | family with sequence similarity 89, member A                                |
| 0,707106781 | 0,02197 | 0,870550563 | 0,00068 | FAM98A   | family with sequence similarity 98, member A                                |
| 1,366987452 | 0,00135 | 1,355664327 | 0,00276 | FARP2    | fatty acyl CoA reductase 2                                                  |
| 0,819036698 | 0,04981 | 0,843815796 | 0,03562 | FARP1    | FERM, RhoGEF (ARHGEF) and pleckstrin domain protein 1 (chondrocyte-derived) |
| 1,424050196 | 0,02627 | 1,351910833 | 0,00497 | FARP1    | FERM, RhoGEF (ARHGEF) and pleckstrin domain protein 1 (chondrocyte-derived) |
| 0,700763725 | 0,00363 | 0,90062598  | 0,03872 | FARP2    | FERM, RhoGEF and pleckstrin domain protein 2                                |
| 1,312211255 | 0,00145 | 1,105730653 | 0,02081 | FASLG    | Fas ligand (TNF superfamily, member 6)                                      |
| 0,732042848 | 0,04578 | 0,840896415 | 0,00095 | FASTKD1  | FAST kinase domains 1                                                       |
| 0,70759708  | 0,0291  | 0,817335328 | 0,00121 | FASTKD2  | FAST kinase domains 2                                                       |
| 0,718968266 | 0,00315 | 0,825305409 | 0,00486 | FASTKD2  | FAST kinase domains 2                                                       |
| 1,395710764 | 0,01019 | 1,479387509 | 0,00003 | FBLN1    | fibulin 1                                                                   |
| 1,481439798 | 0,0418  | 1,295940965 | 0,00002 | FBLN7    | fibulin 7                                                                   |
| 1,573524891 | 0,00068 | 1,425037614 | 0,00002 | FBP1     | fructose-1,6-bisphosphatase 1                                               |
| 1,218410264 | 0,0316  | 1,122721422 | 0,01112 | FBXL22   | F-box and leucine-rich repeat protein 22                                    |
| 0,717972255 | 0,0401  | 0,736113431 | 0,00108 | FBXL3    | F-box and leucine-rich repeat protein 3                                     |

|             |         |             |         |          |                                                                             |
|-------------|---------|-------------|---------|----------|-----------------------------------------------------------------------------|
| 0,512989073 | 0,01233 | 0,62981499  | 0,00035 | FBXL3    | F-box and leucine-rich repeat protein 3                                     |
| 2,167451934 | 0       | 1,674812975 | 0,00001 | FBXO16   | F-box protein 16                                                            |
| 0,796080809 | 0,03415 | 0,819604608 | 0,03558 | FBXO22   | F-box protein 22                                                            |
| 1,335148303 | 0,01144 | 1,570256237 | 0,00008 | FBXO28   | F-box protein 28                                                            |
| 0,648869383 | 0,02775 | 0,702222438 | 0,00005 | FBXO28   | F-box protein 28                                                            |
| 0,528142813 | 0,00495 | 0,649319301 | 0       | FBXO45   | F-box protein 45                                                            |
| 0,544498508 | 0,04382 | 0,597495602 | 0,00002 | FBXO45   | F-box protein 45                                                            |
| 0,808320869 | 0,03004 | 0,880869374 | 0,01656 | FBXO9    | F-box protein 9                                                             |
| 0,753145233 | 0,02796 | 0,770037174 | 0,01619 | FBXO9    | F-box protein 9                                                             |
| 0,61985385  | 0,03318 | 0,752623374 | 0,0008  | FBXW2    | F-box and WD repeat domain containing 2                                     |
| 0,484309095 | 0,00492 | 0,625898229 | 0,00066 | FCER1A   | Fc fragment of IgE, high affinity I, receptor for; alpha polypeptide        |
| 1,723092319 | 0,00526 | 1,355664327 | 0,01291 | FCGR1B   | Fc fragment of IgG, high affinity Ib, receptor (CD64)                       |
| 1,487613762 | 0,00669 | 1,677136369 | 0,00101 | FCGR2A   | Fc fragment of IgG, low affinity IIa, receptor (CD32)                       |
| 2,618970846 | 0,0001  | 2,156960863 | 0,00003 | FCGR2B   | Fc fragment of IgG, low affinity IIb, receptor (CD32)                       |
| 1,688801775 | 0,00856 | 1,512567997 | 0,00176 | FCGR2C   | Fc fragment of IgG, low affinity IIc, receptor for (CD32) (gene/pseudogene) |
| 2,628063254 | 0,00011 | 2,15248025  | 0,00006 | FCGR3B   | Fc fragment of IgG, low affinity IIIb, receptor (CD16b)                     |
| 2,006943497 | 0,00216 | 1,392811481 | 0,00079 | FCHSD2   | FCH and double SH3 domains 2                                                |
| 2,142061646 | 0,00028 | 2,344044567 | 0       | FCN1     | ficolin (collagen/fibrinogen domain containing) 1                           |
| 1,991699506 | 0,00081 | 1,621113024 | 0,00035 | FCRL2    | Fc receptor-like 2                                                          |
| 2,009727641 | 0,00057 | 1,381274448 | 0,00025 | FCRL2    | Fc receptor-like 2                                                          |
| 1,778917987 | 0,00589 | 1,43296165  | 0,00232 | FCRL3    | Fc receptor-like 3                                                          |
| 5,126591697 | 0,00001 | 3,557835974 | 0,00002 | FCRL5    | Fc receptor-like 5                                                          |
| 2,883857743 | 0,00004 | 2,403272099 | 0,00012 | FCRL5    | Fc receptor-like 5                                                          |
| 2,960826596 | 0,00008 | 3,090842199 | 0       | FCRL5    | Fc receptor-like 5                                                          |
| 4,559893091 | 0,00012 | 4,044608323 | 0,0001  | FCRL5    | Fc receptor-like 5                                                          |
| 2,718856484 | 0,00002 | 1,875142193 | 0,00002 | FCRLA    | Fc receptor-like A                                                          |
| 4,863517133 | 0       | 2,747272467 | 0,00001 | FCRLA    | Fc receptor-like A                                                          |
| 3,479789411 | 0,00003 | 1,80125196  | 0,00443 | FCRLA    | Fc receptor-like A                                                          |
| 2,125791349 | 0,00013 | 1,667862088 | 0,00016 | FCRLB    | Fc receptor-like B                                                          |
| 0,714992493 | 0,02982 | 0,725476104 | 0,00001 | FDF1     | farnesyl-diphosphate farnesyltransferase 1                                  |
| 0,632439771 | 0,03069 | 0,733058379 | 0,00002 | FDPS     | farnesyl diphosphate synthase                                               |
| 0,824162085 | 0,0361  | 0,854409741 | 0,00859 | FECH     | ferrochelatase                                                              |
| 0,585199321 | 0,0232  | 0,731028724 | 0,00005 | FEM1B    | fem-1 homolog b (C. elegans)                                                |
| 0,612168196 | 0,00621 | 0,668037039 | 0,02838 | FEM1B    | fem-1 homolog b (C. elegans)                                                |
| 0,597909898 | 0,00267 | 0,66158572  | 0,00041 | FEM1C    | fem-1 homolog c (C. elegans)                                                |
| 0,655196702 | 0,03309 | 0,829319546 | 0,01059 | FER      | fer (fps/fes related) tyrosine kinase                                       |
| 1,962918128 | 0,00039 | 2,171963713 | 0,00003 | FER1L4   | fer-1-like 4 (C. elegans) pseudogene                                        |
| 0,729510172 | 0,02979 | 0,816768991 | 0,01075 | FERMT1   | fermitin family member 1                                                    |
| 1,77399261  | 0,00029 | 1,483494934 | 0,00089 | FERMT3   | fermitin family member 3                                                    |
| 0,549046407 | 0,00127 | 0,722966147 | 0,0253  | FETUB    | fetuin B                                                                    |
| 1,702907415 | 0,00116 | 1,338855257 | 0,00256 | FEZ1     | fasciculation and elongation protein zeta 1 (zyglin I)                      |
| 1,982059127 | 0,00451 | 1,365093718 | 0,00673 | FFAR2    | free fatty acid receptor 2                                                  |
| 1,320422841 | 0,0099  | 1,218410264 | 0,00292 | FFAR3    | free fatty acid receptor 3                                                  |
| 1,572434584 | 0,02404 | 1,436940177 | 0       | FGD2     | FYVE, RhoGEF and PH domain containing 2                                     |
| 1,380317353 | 0,00114 | 1,144724161 | 0,02125 | FGD3     | FYVE, RhoGEF and PH domain containing 3                                     |
| 1,35754498  | 0,01219 | 1,125058485 | 0,04318 | FGD5     | FYVE, RhoGEF and PH domain containing 5                                     |
| 1,342572503 | 0,01484 | 1,232852325 | 0,02915 | FGD5     | FYVE, RhoGEF and PH domain containing 5                                     |
| 1,209155676 | 0,01738 | 1,194991205 | 0,01867 | FGF18    | fibroblast growth factor 18                                                 |
| 1,210833084 | 0,01711 | 1,100378609 | 0,04684 | FGF4     | fibroblast growth factor 4                                                  |
| 0,461691155 | 0,0116  | 0,744838732 | 0,02037 | FGFBP1   | fibroblast growth factor binding protein 1                                  |
| 0,638164384 | 0,00538 | 0,778085177 | 0,01    | FGFR2    | fibroblast growth factor receptor 2                                         |
| 0,641712949 | 0,00204 | 0,735093668 | 0,02315 | FGFR2    | fibroblast growth factor receptor 2                                         |
| 1,411275843 | 0,00162 | 1,396678532 | 0,01338 | FGL2     | fibrinogen-like 2                                                           |
| 1,417157397 | 0,00112 | 1,243149669 | 0,00182 | FGR      | Gardner-Rasheed feline sarcoma viral (v-fgr) oncogene homolog               |
| 0,71400199  | 0,03645 | 0,840313752 | 0,0029  | FH       | fumarate hydratase                                                          |
| 1,855746953 | 0,0148  | 1,630144665 | 0,00009 | FICD     | FIC domain containing                                                       |
| 0,622005827 | 0,00046 | 0,788400174 | 0,04568 | FIGNL1   | figdgetin-like 1                                                            |
| 0,622868708 | 0,00694 | 0,719965659 | 0,00001 | FIP1L1   | FIP1 like 1 (S. cerevisiae)                                                 |
| 1,372684431 | 0,01527 | 1,317679952 | 0,00759 | FKBP10   | FK506 binding protein 10, 65 kDa                                            |
| 3,173335373 | 0,00006 | 2,905930099 | 0,00003 | FKBP11   | FK506 binding protein 11, 19 kDa                                            |
| 3,338037125 | 0,00065 | 3,276146791 | 0,00001 | FKBP11   | FK506 binding protein 11, 19 kDa                                            |
| 1,413233644 | 0,04604 | 1,281647924 | 0,01335 | FKBP11   | FK506 binding protein 11, 19 kDa                                            |
| 0,683967652 | 0,00435 | 0,738669032 | 0       | FKBP3    | FK506 binding protein 3, 25kDa                                              |
| 0,670821112 | 0,00331 | 0,836826243 | 0,02793 | FKBPL    | FK506 binding protein like                                                  |
| 0,22144188  | 0,01206 | 0,498270131 | 0,02591 | FLG2     | filaggrin family member 2                                                   |
| 2,009727641 | 0,0004  | 1,631274987 | 0,00036 | FLI1     | Friend leukemia virus integration 1                                         |
| 1,22858698  | 0,04014 | 1,180174343 | 0,00024 | FLJ30430 | hypothetical protein FLJ30430                                               |
| 1,953417058 | 0,00146 | 1,677136369 | 0,0008  | FLJ32255 | hypothetical LOC643977                                                      |
| 1,599920257 | 0,02805 | 1,271913007 | 0,00512 | FLJ32255 | hypothetical LOC643977                                                      |
| 1,204972315 | 0,01361 | 1,198309021 | 0,00328 | FLJ33065 | hypothetical LOC440952                                                      |
| 1,296839555 | 0,03583 | 1,316766922 | 0,00146 | FLJ35390 | hypothetical LOC255031                                                      |
| 1,32408891  | 0,01507 | 1,256142381 | 0,01911 | FLJ38109 | hypothetical LOC386627                                                      |
| 1,35754498  | 0,01224 | 1,320422841 | 0,00008 | FLJ39051 | hypothetical LOC399972                                                      |
| 1,242288282 | 0,01899 | 1,25353302  | 0,00172 | FLJ39061 | hypothetical protein FLJ39061                                               |
| 2,142061646 | 0,00537 | 1,383190629 | 0,00141 | FLJ43663 | hypothetical LOC378805                                                      |
| 0,680657058 | 0,003   | 0,705637922 | 0,00022 | FLJ45482 | hypothetical LOC645566                                                      |
| 1,41029796  | 0,00435 | 1,25092908  | 0,00196 | FLT3     | fms-related tyrosine kinase 3                                               |
| 0,581963267 | 0,00111 | 0,66296288  | 0,00064 | FLVCR1   | feline leukemia virus subgroup C cellular receptor 1                        |
| 0,615572207 | 0,00062 | 0,754712984 | 0,00817 | FLVCR1   | feline leukemia virus subgroup C cellular receptor family, member 2         |
| 1,418140036 | 0,02237 | 1,326845141 | 0,00016 | FMNL1    | formin-like 1                                                               |
| 1,514666316 | 0,02653 | 1,371733289 | 0,00268 | FMNL1    | formin-like 1                                                               |
| 1,412254404 | 0,01031 | 1,231998073 | 0,00228 | FMNL3    | formin-like 3                                                               |
| 1,596596773 | 0,00016 | 1,329607108 | 0,00014 | FMNL3    | formin-like 3                                                               |
| 1,994462503 | 0,00843 | 1,64832417  | 0,00034 | FMO1     | flavin containing monooxygenase 1                                           |
| 1,256142381 | 0,03572 | 1,360370852 | 0       | FMO4     | flavin containing monooxygenase 4                                           |
| 1,299539062 | 0,01914 | 1,203303026 | 0,02038 | FN1      | fibronectin 1                                                               |
| 1,980685744 | 0,03826 | 1,382232207 | 0,02116 | FNDC1    | fibronectin type III domain containing 1                                    |
| 1,993080526 | 0,00147 | 1,362258035 | 0,02401 | FNDC3A   | fibronectin type III domain containing 3A                                   |
| 1,43296165  | 0,03492 | 1,583371732 | 0,00671 | FNDC3A   | fibronectin type III domain containing 3A                                   |
| 2,335934789 | 0,02653 | 1,770307529 | 0,00085 | FNDC3B   | fibronectin type III domain containing 3B                                   |
| 1,994462503 | 0,00001 | 2,032140286 | 0       | FNDC3B   | fibronectin type III domain containing 3B                                   |
| 2,093620564 | 0,0002  | 1,848045145 | 0,00021 | FNDC3B   | fibronectin type III domain containing 3B                                   |
| 1,909242028 | 0,00092 | 1,584469622 | 0,00019 | FNDC3B   | fibronectin type III domain containing 3B                                   |
| 1,939923821 | 0,00013 | 1,501079098 | 0,00011 | FNDC3B   | fibronectin type III domain containing 3B                                   |
| 1,412254404 | 0,01875 | 1,299539062 | 0,00199 | FNDC4    | fibronectin type III domain containing 4                                    |
| 0,634635443 | 0,01256 | 0,782411782 | 0,00693 | FNIP2    | folliculin interacting protein 2                                            |
| 0,699792933 | 0,0123  | 0,768437591 | 0,00011 | FNTA     | farnesyltransferase, CAAX box, alpha                                        |
| 0,610896551 | 0,01794 | 0,712025098 | 0,00333 | FNTB     | farnesyltransferase, CAAX box, beta                                         |



|             |         |             |         |         |                                                                                                                            |
|-------------|---------|-------------|---------|---------|----------------------------------------------------------------------------------------------------------------------------|
| 0,757858283 | 0,00105 | 0,819604608 | 0,00374 | FNTB    | farnesyltransferase, CAAX box, beta                                                                                        |
| 1,70408819  | 0,00194 | 1,544350266 | 0,00001 | FOLR2   | folate receptor 2 (fetal)                                                                                                  |
| 0,582770599 | 0,00053 | 0,831045862 | 0,02559 | FOSL2   | FOS-like antigen 2                                                                                                         |
| 1,572434584 | 0,01342 | 1,684125907 | 0,00536 | FOXC1   | forkhead box C1                                                                                                            |
| 0,661127303 | 0,0109  | 0,70759708  | 0,00122 | FOXE1   | forkhead box E1 (thyroid transcription factor 2)                                                                           |
| 0,792234811 | 0,04771 | 0,825877665 | 0,00134 | FOXJ3   | forkhead box J3                                                                                                            |
| 0,388234438 | 0,00058 | 0,543744195 | 0,00008 | FOXN1   | forkhead box N1                                                                                                            |
| 0,580754366 | 0,00791 | 0,786217292 | 0,00142 | FOXN3   | forkhead box N3                                                                                                            |
| 0,477310507 | 0,00122 | 0,777546036 | 0,04134 | FOXP2   | forkhead box P2                                                                                                            |
| 0,427501089 | 0,00255 | 0,544876056 | 0,00003 | FOXP2   | forkhead box P2                                                                                                            |
| 0,440129507 | 0,03161 | 0,411795509 | 0,00004 | FOXP2   | forkhead box P2                                                                                                            |
| 2,323017464 | 0,00018 | 1,884262548 | 0,00016 | FPR1    | formyl peptide receptor 1                                                                                                  |
| 1,561572985 | 0,00582 | 1,278099363 | 0,00274 | FPR2    | formyl peptide receptor 2                                                                                                  |
| 1,392811481 | 0,00644 | 1,220946513 | 0,01535 | FPR2    | formyl peptide receptor 2                                                                                                  |
| 0,709561678 | 0,00027 | 0,760489377 | 0,00001 | FRG1    | FSD region gene 1                                                                                                          |
| 0,658839976 | 0,0169  | 0,806641759 | 0,02712 | FRMD4A  | FERM domain containing 4A                                                                                                  |
| 0,683967652 | 0,04336 | 0,762072415 | 0,00019 | FRMD6   | FERM domain containing 6                                                                                                   |
| 1,643760375 | 0,0015  | 1,262252032 | 0,01279 | FRZB    | frizzled-related protein                                                                                                   |
| 1,364147835 | 0,01149 | 1,557249382 | 0,00023 | FSTL1   | folliculin-like 1                                                                                                          |
| 1,359428242 | 0,036   | 1,254402205 | 0,00469 | FSTL1   | folliculin-like 1                                                                                                          |
| 1,635804117 | 0,00841 | 1,317679952 | 0,00534 | FTH1    | ferritin, heavy polypeptide 1                                                                                              |
| 1,402499251 | 0,00203 | 1,293248932 | 0,00013 | FTH1P5  | ferritin, heavy polypeptide 1 pseudogene 5                                                                                 |
| 1,305859787 | 0,02965 | 1,436940177 | 0,00002 | FTL     | ferritin, light polypeptide                                                                                                |
| 1,725482689 | 0,01464 | 1,8263965   | 0       | FUCA1   | fucosidase, alpha-L- 1, tissue                                                                                             |
| 1,59549048  | 0,00023 | 1,219255094 | 0,00974 | FUCA2   | fucosidase, alpha-L- 2, plasma                                                                                             |
| 0,71400199  | 0,03379 | 0,70759708  | 0,00015 | FUNDC1  | FUN14 domain containing 1                                                                                                  |
| 1,263127262 | 0,02411 | 1,209155676 | 0,00429 | FUT6    | fucosyltransferase 6 (alpha (1,3) fucosyltransferase)                                                                      |
| 1,854461093 | 0,00498 | 1,629015126 | 0,00221 | FUT8    | fucosyltransferase 8 (alpha (1,6) fucosyltransferase)                                                                      |
| 2,161450804 | 0,00527 | 1,741101127 | 0,00024 | FUT8    | fucosyltransferase 8 (alpha (1,6) fucosyltransferase)                                                                      |
| 1,733875127 | 0,0024  | 1,377450046 | 0,02464 | FYB     | FYN binding protein                                                                                                        |
| 1,808758755 | 0,00319 | 1,678299274 | 0,00413 | FYB     | FYN binding protein                                                                                                        |
| 0,611744021 | 0,00261 | 0,732042848 | 0,00002 | FYCO1   | FYVE and coiled-coil domain containing 1                                                                                   |
| 1,289668251 | 0,03861 | 1,340712592 | 0,00456 | FYN     | FYN oncogene related to SRC, FGR, YES                                                                                      |
| 0,525586455 | 0,00325 | 0,659296807 | 0,00231 | FZD10   | frizzled family receptor 10                                                                                                |
| 1,514666316 | 0,00205 | 1,463071221 | 0,00002 | FZD4    | frizzled family receptor 4                                                                                                 |
| 1,888184838 | 0,00107 | 1,644900137 | 0,00308 | G0S2    | G0/G1switch 2                                                                                                              |
| 0,567227742 | 0,02428 | 0,739181216 | 0,00494 | G2E3    | G2/M-phase specific E3 ubiquitin protein ligase                                                                            |
| 1,456999114 | 0,00174 | 1,264879542 | 0,00249 | G6PC3   | glucose 6 phosphatase, catalytic, 3                                                                                        |
| 0,774855931 | 0,029   | 0,801069878 | 0,00475 | GABRQ   | gamma-aminobutyric acid (GABA) receptor, theta                                                                             |
| 1,480413298 | 0,0019  | 1,408344227 | 0,00463 | GADD45B | growth arrest and DNA-damage-inducible, beta                                                                               |
| 0,669891801 | 0,0054  | 0,717972255 | 0,00168 | GALNT12 | UDP-N-acetyl-alpha-D-galactosamine:polypeptide N-acetylgalactosaminyltransferase 12 (GalNAc-T12)                           |
| 1,342572503 | 0,02563 | 1,126619228 | 0,04184 | GALNT2  | UDP-N-acetyl-alpha-D-galactosamine:polypeptide N-acetylgalactosaminyltransferase 2 (GalNAc-T2)                             |
| 0,752623374 | 0,0411  | 0,771640088 | 0,0085  | GAPVD1  | GTPase activating protein and VPS9 domains 1                                                                               |
| 0,758383773 | 0,00491 | 0,720464874 | 0       | GAR1    | GAR1 ribonucleoprotein homolog (yeast)                                                                                     |
| 0,658839976 | 0,01135 | 0,817902059 | 0,00162 | GART    | phosphoribosylglycinamide formyltransferase, phosphoribosylglycinamide synthetase, phosphoribosylaminoimidazole synthetase |
| 0,564873607 | 0,00658 | 0,661127303 | 0,00031 | GAS2L1  | growth arrest-specific 2 like 1                                                                                            |
| 0,507331273 | 0,00004 | 0,663882579 | 0,00001 | GAS2L1  | growth arrest-specific 2 like 1                                                                                            |
| 0,51584159  | 0,00849 | 0,78024548  | 0,00189 | GAS5    | growth arrest-specific 5 (non-protein coding)                                                                              |
| 1,177727279 | 0,0373  | 1,133669413 | 0,03986 | GAS5    | growth arrest-specific 5 (non-protein coding)                                                                              |
| 0,553632292 | 0,00474 | 0,568802614 | 0       | GAS7    | growth arrest-specific 7                                                                                                   |
| 0,710053679 | 0,02909 | 0,787307977 | 0,00338 | GAS7    | growth arrest-specific 7                                                                                                   |
| 0,759962428 | 0,0349  | 0,617281303 | 0       | GAS7    | growth arrest-specific 7                                                                                                   |
| 1,294145654 | 0,02945 | 1,139183377 | 0,02587 | GAST    | gastrin                                                                                                                    |
| 0,643048742 | 0,0016  | 0,741747467 | 0,00005 | GATAD2A | GATA zinc finger domain containing 2A                                                                                      |
| 0,592546385 | 0,04923 | 0,61813763  | 0,00567 | GATM    | glycine amidinotransferase (L-arginine:glycine amidinotransferase)                                                         |
| 1,411275843 | 0,01469 | 1,136029265 | 0,03193 | GBA3    | glucosidase, beta, acid 3 (cytosolic)                                                                                      |
| 1,591072968 | 0,003   | 1,509425969 | 0,00018 | GBGT1   | globoside alpha-1,3-N-acetylgalactosaminyltransferase 1                                                                    |
| 0,294226684 | 0,00603 | 0,496546248 | 0       | GBP6    | guanylate binding protein family, member 6                                                                                 |
| 0,552482242 | 0,01368 | 0,662044455 | 0,00008 | GBP6    | guanylate binding protein family, member 6                                                                                 |
| 2,064797071 | 0,00657 | 1,325007017 | 0,00645 | GCA     | granulosa cell calcium binding protein                                                                                     |
| 1,207480591 | 0,02291 | 1,110338834 | 0,01092 | GCET2   | germinal center expressed transcript 2                                                                                     |
| 1,471206746 | 0,01981 | 1,421092043 | 0,00131 | GCHFR   | GTP cyclohydrolase I feedback regulator                                                                                    |
| 0,39012274  | 0,00467 | 0,647072827 | 0,03036 | GDA     | guanidine deaminase                                                                                                        |
| 1,75199663  | 0,00055 | 2,02791896  | 0,00014 | GDF15   | growth differentiation factor 15                                                                                           |
| 0,742261785 | 0,01503 | 0,768437591 | 0,00034 | GEMIN4  | gem (nuclear organelle) associated protein 4                                                                               |
| 1,383190629 | 0,01174 | 1,237990291 | 0,01343 | GFI1    | growth factor independent 1 transcription repressor                                                                        |
| 0,630688704 | 0,01588 | 0,70759708  | 0,00702 | GFM1    | G elongation factor, mitochondrial 1                                                                                       |
| 0,61429349  | 0,00367 | 0,772175133 | 0,00006 | GGCT    | gamma-glutamylcyclotransferase                                                                                             |
| 0,492433221 | 0,00572 | 0,582366793 | 0,00098 | GGH     | gamma-glutamyl hydrolase (conjugase, folic polygamma glutamyl hydrolase)                                                   |
| 0,659753955 | 0,00156 | 0,801625329 | 0,01121 | GGPS1   | geranylgeranyl diphosphate synthase 1                                                                                      |
| 1,447398172 | 0,01667 | 1,4054187   | 0,00029 | GGT5    | gamma-glutamyltransferase 5                                                                                                |
| 0,52850902  | 0,00867 | 0,710053679 | 0,00113 | GGT6    | gamma-glutamyltransferase 6                                                                                                |
| 0,76154437  | 0,02167 | 0,812252396 | 0,00164 | GHITM   | growth hormone inducible transmembrane protein                                                                             |
| 1,602139755 | 0,00375 | 1,382232207 | 0,00626 | GIMAP1  | GTPase, IMAP family member 1                                                                                               |
| 1,665551542 | 0,00557 | 1,474269217 | 0,0002  | GIMAP4  | GTPase, IMAP family member 4                                                                                               |
| 1,74956953  | 0,00134 | 1,45195828  | 0,00002 | GIMAP5  | GTPase, IMAP family member 5                                                                                               |
| 1,531557997 | 0,00213 | 1,468150636 | 0,00002 | GIMAP5  | GTPase, IMAP family member 5                                                                                               |
| 1,913216316 | 0,00087 | 1,308578071 | 0,02387 | GIMAP6  | GTPase, IMAP family member 6                                                                                               |
| 2,134650676 | 0,00005 | 1,336074078 | 0,00608 | GIMAP6  | GTPase, IMAP family member 6                                                                                               |
| 1,194991205 | 0,04186 | 1,204137381 | 0,00264 | GIMAP8  | GTPase, IMAP family member 8                                                                                               |
| 0,654289036 | 0,03012 | 0,790041312 | 0,00539 | GJA1    | gap junction protein, alpha 1, 43kDa                                                                                       |
| 0,39066394  | 0,00036 | 0,50557604  | 0       | GJA3    | gap junction protein, alpha 3, 46kDa                                                                                       |
| 1,565908593 | 0,00044 | 1,325007017 | 0,00019 | GJA4    | gap junction protein, alpha 4, 37kDa                                                                                       |
| 1,388955136 | 0,00489 | 1,304954948 | 0,0012  | GJA4    | gap junction protein, alpha 4, 37kDa                                                                                       |
| 1,351910833 | 0,01166 | 1,151089491 | 0,0178  | GJA5    | gap junction protein, alpha 5, 40kDa                                                                                       |
| 1,642621402 | 0,00007 | 1,353786279 | 0,01588 | GJA5    | gap junction protein, alpha 5, 40kDa                                                                                       |
| 0,695923196 | 0,0114  | 0,777546036 | 0,00719 | GJB6    | gap junction protein, beta 6, 30kDa                                                                                        |
| 1,631274987 | 0,03122 | 1,299539062 | 0,01466 | GJC1    | gap junction protein, gamma 1, 45kDa                                                                                       |
| 1,271031689 | 0,0198  | 1,241427492 | 0,00754 | GJC1    | gap junction protein, gamma 1, 45kDa                                                                                       |
| 0,622868708 | 0,01141 | 0,623300597 | 0,00026 | GK5     | glycerol kinase 5 (putative)                                                                                               |
| 1,378405153 | 0,00872 | 1,190856849 | 0,00168 | GLB1    | galactosidase, beta 1                                                                                                      |
| 1,772763398 | 0,00487 | 1,592176198 | 0,00328 | GLCC1   | glucocorticoid induced transcript 1                                                                                        |
| 2,713208655 | 0,00005 | 2,130216407 | 0,00017 | GLCC1   | glucocorticoid induced transcript 1                                                                                        |
| 2,911979098 | 0,00019 | 1,89605393  | 0,00329 | GLCC1   | glucocorticoid induced transcript 1                                                                                        |
| 2,418311352 | 0,00001 | 1,802500925 | 0,0003  | GLDC    | glycine dehydrogenase (decarboxylating)                                                                                    |
| 0,748461493 | 0,01689 | 0,812252396 | 0,00116 | GLE1    | GLE1 RNA export mediator homolog (yeast)                                                                                   |
| 1,441928871 | 0,00996 | 1,22603486  | 0,01885 | GLIS2   | GLIS family zinc finger 2                                                                                                  |
| 0,743806881 | 0,03569 | 0,715984371 | 0,00009 | GLMN    | glomulin, FKBP associated protein                                                                                          |

|             |         |             |         |          |                                                                                         |
|-------------|---------|-------------|---------|----------|-----------------------------------------------------------------------------------------|
| 0,671286251 | 0,00898 | 0,845572287 | 0,00135 | GLO1     | glyoxalase I                                                                            |
| 1,186736798 | 0,03424 | 1,190031696 | 0,00337 | GLYATL1  | glycine-N-acyltransferase-like 1                                                        |
| 1,252664439 | 0,02311 | 1,176906737 | 0,00905 | GLYR1    | glyoxylate reductase 1 homolog (Arabidopsis)                                            |
| 1,500038989 | 0,00709 | 1,565908593 | 0,00014 | GFMG     | glia maturation factor, gamma                                                           |
| 1,442928687 | 0,00524 | 1,22858698  | 0,0036  | GMPPB    | GDP-mannose pyrophosphorylase B                                                         |
| 0,808320869 | 0,03157 | 0,877821798 | 0,00283 | GMPS     | guanine monophosphate synthetase                                                        |
| 1,286097483 | 0,01262 | 1,16634937  | 0,00294 | GNA14    | guanine nucleotide binding protein (G protein), alpha 14                                |
| 1,387030969 | 0,01591 | 1,22603486  | 0,00208 | GNA14    | guanine nucleotide binding protein (G protein), alpha 14                                |
| 0,704660378 | 0,03098 | 0,786762445 | 0,00278 | GNA15    | guanine nucleotide binding protein (G protein), alpha 15 (Gq class)                     |
| 0,575544746 | 0,00557 | 0,693515485 | 0,00962 | GNAI3    | guanine nucleotide binding protein (G protein), alpha inhibiting activity polypeptide 3 |
| 0,671286251 | 0,02824 | 0,755236293 | 0,00012 | GNAI3    | guanine nucleotide binding protein (G protein), alpha inhibiting activity polypeptide 3 |
| 1,250062303 | 0,03634 | 1,199971382 | 0,01896 | GNAO1    | guanine nucleotide binding protein (G protein), alpha activating activity polypeptide O |
| 1,322254605 | 0,02142 | 1,199139914 | 0,03306 | GNAO1    | guanine nucleotide binding protein (G protein), alpha activating activity polypeptide O |
| 2,020902893 | 0,00203 | 1,399585866 | 0,00415 | GNAS     | GNAS complex locus                                                                      |
| 1,582274602 | 0,0108  | 1,241427492 | 0,0421  | GNE      | glucosamine ((UDP-N-acetyl)-2-epimerase/N-acetylmannosamine kinase                      |
| 1,277213759 | 0,03215 | 1,342572503 | 0,00066 | NGG11    | guanine nucleotide binding protein (G protein), gamma 11                                |
| 0,625898229 | 0,0202  | 0,79940583  | 0,02012 | NGG12    | guanine nucleotide binding protein (G protein), gamma 12                                |
| 1,227735684 | 0,03698 | 1,147107024 | 0,00238 | GNG4     | guanine nucleotide binding protein (G protein), gamma 4                                 |
| 0,767905135 | 0,00264 | 0,835666959 | 0,00085 | GNG5     | guanine nucleotide binding protein (G protein), gamma 5                                 |
| 2,061936638 | 0,00016 | 1,921189728 | 0,00014 | GNG7     | guanine nucleotide binding protein (G protein), gamma 7                                 |
| 1,659789171 | 0,00128 | 1,408344227 | 0,00041 | GNG7     | guanine nucleotide binding protein (G protein), gamma 7                                 |
| 1,325007017 | 0,03928 | 1,185914499 | 0,00482 | GNL1     | guanine nucleotide binding protein-like 1                                               |
| 0,5         | 0,01179 | 0,671751713 | 0       | GNL2     | guanine nucleotide binding protein-like 2 (nucleolar)                                   |
| 0,711531731 | 0,01408 | 0,843815796 | 0,01032 | GNL3     | guanine nucleotide binding protein-like 3 (nucleolar)                                   |
| 1,650610817 | 0,00641 | 1,461044379 | 0,00072 | GNLY     | granulysin                                                                              |
| 1,721898377 | 0,00134 | 1,606587994 | 0,00001 | GNLY     | granulysin                                                                              |
| 0,78024548  | 0,00453 | 0,839149637 | 0,00808 | GNRH1    | gonadotropin-releasing hormone 1 (lutening-releasing hormone)                           |
| 0,637722196 | 0,0438  | 0,795536484 | 0,00539 | GOLGA2   | golgin A2                                                                               |
| 0,662503509 | 0,03648 | 0,750539549 | 0,00106 | GOLGA4   | golgin A4                                                                               |
| 1,42800398  | 0,04729 | 1,237132479 | 0,00188 | GOLPH3L  | golgi phosphoprotein 3-like                                                             |
| 1,216722359 | 0,01873 | 1,16634937  | 0,01532 | GOSR2    | golgi SNAP receptor complex member 2                                                    |
| 0,615572207 | 0,02458 | 0,773782497 | 0,00159 | GPATCH4  | G patch domain containing 4                                                             |
| 0,754712984 | 0,03447 | 0,858565436 | 0,00783 | GPPB1L1  | GC-rich promoter binding protein 1-like 1                                               |
| 0,700763725 | 0,01506 | 0,827023368 | 0,02902 | GPPB1L1  | GC-rich promoter binding protein 1-like 1                                               |
| 0,539240216 | 0,01537 | 0,79940583  | 0,00066 | GPC1     | glypican 1                                                                              |
| 1,967004148 | 0,00568 | 1,444930398 | 0,00143 | GPC6     | glypican 6                                                                              |
| 1,332374825 | 0,00824 | 1,222640278 | 0,00438 | GPGR     | G protein-coupled estrogen receptor 1                                                   |
| 1,194163187 | 0,03769 | 1,20664392  | 0,00334 | GPHA2    | glycoprotein hormone alpha 2                                                            |
| 0,739693755 | 0,03983 | 0,846158597 | 0,00888 | GPR1     | G protein-coupled receptor 1                                                            |
| 1,662091723 | 0,02483 | 1,834008086 | 0,00114 | GPR110   | G protein-coupled receptor 110                                                          |
| 1,450952208 | 0,00438 | 1,265756594 | 0,00055 | GPR114   | G protein-coupled receptor 114                                                          |
| 0,559030925 | 0,00221 | 0,740206649 | 0,03965 | GPR115   | G protein-coupled receptor 115                                                          |
| 0,523768064 | 0,01933 | 0,528875482 | 0,00001 | GPR115   | G protein-coupled receptor 115                                                          |
| 1,624504793 | 0,00989 | 1,417157397 | 0,00721 | GPR116   | G protein-coupled receptor 116                                                          |
| 1,28788163  | 0,01491 | 1,440929749 | 0,00001 | GPR12    | G protein-coupled receptor 12                                                           |
| 0,683020128 | 0,02062 | 0,643048742 | 0,00001 | GPR126   | G protein-coupled receptor 126                                                          |
| 1,256142381 | 0,02018 | 1,116512962 | 0,01385 | GPR132   | G protein-coupled receptor 132                                                          |
| 1,692317193 | 0,01139 | 1,155085785 | 0,03202 | GPR133   | G protein-coupled receptor 133                                                          |
| 2,850075228 | 0,00028 | 1,582274602 | 0,00585 | GPR160   | G protein-coupled receptor 160                                                          |
| 1,372684431 | 0,00197 | 1,199971382 | 0,00479 | GPR173   | G protein-coupled receptor 173                                                          |
| 1,271031689 | 0,01789 | 1,231144413 | 0,00011 | GPR182   | G protein-coupled receptor 182                                                          |
| 1,915870436 | 0,00266 | 1,350974085 | 0,0474  | GPR183   | G protein-coupled receptor 183                                                          |
| 1,21335356  | 0,0231  | 1,198309021 | 0,00539 | GPR26    | G protein-coupled receptor 26                                                           |
| 1,448942155 | 0,00913 | 1,221793102 | 0,01255 | GPR4     | G protein-coupled receptor 4                                                            |
| 0,571569168 | 0,01561 | 0,774319028 | 0,01672 | GPR56    | G protein-coupled receptor 56                                                           |
| 1,993080526 | 0,00002 | 1,515716567 | 0,00138 | GPR65    | G protein-coupled receptor 65                                                           |
| 0,604158922 | 0,00582 | 0,726986259 | 0,0058  | GPR87    | G protein-coupled receptor 87                                                           |
| 1,32408891  | 0,03658 | 1,20163605  | 0,00368 | GPR97    | G protein-coupled receptor 97                                                           |
| 1,423063461 | 0,00747 | 1,360370852 | 0,00127 | GPRC5B   | G protein-coupled receptor, family C, group 5, member B                                 |
| 0,653835674 | 0,00236 | 0,852044095 | 0,03365 | GPRIN2   | G protein regulated inducer of neurite outgrowth 2                                      |
| 0,509798841 | 0,00133 | 0,628942486 | 0,00224 | GPSM2    | G-protein signaling modulator 2                                                         |
| 0,460093825 | 0,00484 | 0,686342216 | 0,00002 | GPSM2    | G-protein signaling modulator 2                                                         |
| 0,731028724 | 0,01664 | 0,691595315 | 0,00001 | GPSM2    | G-protein signaling modulator 2                                                         |
| 2,011121161 | 0,00058 | 1,880348405 | 0,00001 | GPSM3    | G-protein signaling modulator 3                                                         |
| 1,370782805 | 0,01322 | 1,313121125 | 0,00616 | GPSM3    | G-protein signaling modulator 3                                                         |
| 1,50733491  | 0,0161  | 1,28788163  | 0,0113  | GPX7     | glutathione peroxidase 7                                                                |
| 1,556170353 | 0,00279 | 1,486582984 | 0,00002 | GRAMD1A  | GRAM domain containing 1A                                                               |
| 1,446934886 | 0,01256 | 1,243149669 | 0,00397 | GRAMD1A  | GRAM domain containing 1A                                                               |
| 1,311302014 | 0,04146 | 1,325007017 | 0,00006 | GRAMD1B  | GRAM domain containing 1B                                                               |
| 0,537747195 | 0,0449  | 0,659296807 | 0,0132  | GRAMD1C  | GRAM domain containing 1C                                                               |
| 0,44844408  | 0,01523 | 0,620713746 | 0,02634 | GRHL1    | grainyhead-like 1 (Drosophila)                                                          |
| 0,568014632 | 0,01557 | 0,626332219 | 0,00069 | GRHL1    | grainyhead-like 1 (Drosophila)                                                          |
| 0,637722196 | 0,00177 | 0,774319028 | 0,00101 | GRHL2    | grainyhead-like 2 (Drosophila)                                                          |
| 0,483303049 | 0,00062 | 0,550952558 | 0,00003 | GRHL3    | grainyhead-like 3 (Drosophila)                                                          |
| 1,263127262 | 0,00843 | 1,17772279  | 0,00183 | GRIP2    | glutamate receptor interacting protein 2                                                |
| 1,433955248 | 0,00667 | 1,262252032 | 0,00151 | GRK5     | G protein-coupled receptor kinase 5                                                     |
| 0,672217497 | 0,018   | 0,791685866 | 0,00299 | GRPEL1   | GrpE-like 1, mitochondrial (E. coli)                                                    |
| 0,619424349 | 0,00669 | 0,681129017 | 0,00005 | GRTF1    | growth hormone regulated TBC protein 1                                                  |
| 0,566049451 | 0,00063 | 0,747424624 | 0,0017  | GSDMC    | gasdermin C                                                                             |
| 0,721964598 | 0,04335 | 0,733566672 | 0,00002 | GSK3B    | glycogen synthase kinase 3 beta                                                         |
| 0,649319301 | 0,03907 | 0,801069878 | 0,0221  | GSK3B    | glycogen synthase kinase 3 beta                                                         |
| 1,546492675 | 0,02288 | 1,25353302  | 0,02279 | GSPT2    | G1 to S phase transition 2                                                              |
| 0,673616788 | 0,00046 | 0,883927531 | 0,03629 | GSTA3    | glutathione S-transferase alpha 3                                                       |
| 0,418413121 | 0,00012 | 0,600401714 | 0,00013 | GSTA4    | glutathione S-transferase alpha 4                                                       |
| 0,375009747 | 0,00304 | 0,531079593 | 0,00005 | GSTA4    | glutathione S-transferase alpha 4                                                       |
| 1,252664439 | 0,03603 | 1,204972315 | 0,04914 | GSTM5    | glutathione S-transferase mu 5                                                          |
| 0,724973416 | 0,00591 | 0,85086373  | 0,01326 | GSTO2    | glutathione S-transferase omega 2                                                       |
| 1,398616083 | 0,02233 | 1,286989247 | 0,00344 | GTDC1    | glycosyltransferase-like domain containing 1                                            |
| 0,712025098 | 0,03278 | 0,758383773 | 0,00606 | GTF2A2   | general transcription factor IIA, 2, 12kDa                                              |
| 0,605416542 | 0,00663 | 0,770571108 | 0,00303 | GTF2F2   | general transcription factor IIF, polypeptide 2, 30kDa                                  |
| 0,550952558 | 0,02064 | 0,806082831 | 0,00841 | GTF2H1   | general transcription factor IIH, polypeptide 1, 62kDa                                  |
| 0,656105627 | 0,00134 | 0,833353207 | 0,00153 | GTF2H5   | general transcription factor IIH, polypeptide 5                                         |
| 0,790041312 | 0,04604 | 0,868140228 | 0,00831 | GTF2IRD1 | GTF2I repeat domain containing 1                                                        |
| 0,623732786 | 0,00345 | 0,744838732 | 0,00033 | GTF3C4   | general transcription factor IIIC, polypeptide 4, 90kDa                                 |
| 0,732550437 | 0,00804 | 0,718470088 | 0       | GTF3C6   | general transcription factor IIIC, polypeptide 6, alpha 35kDa                           |
| 0,687770909 | 0,02378 | 0,804408371 | 0,00384 | GTPBP10  | GTP-binding protein 10 (putative)                                                       |
| 0,67877249  | 0,03534 | 0,762072415 | 0,00115 | GTPBP4   | GTP binding protein 4                                                                   |
| 1,639209215 | 0,00037 | 1,321338406 | 0,00986 | GTSF1    | gametocyte specific factor 1                                                            |

|             |         |             |         |            |                                                                                                |
|-------------|---------|-------------|---------|------------|------------------------------------------------------------------------------------------------|
| 1,358486285 | 0,01413 | 1,202469249 | 0,00121 | GTSF1L     | gametocyte specific factor 1-like                                                              |
| 1,919858522 | 0,01112 | 1,372684431 | 0,00611 | GUCY1B3    | guanylate cyclase 1, soluble, beta 3                                                           |
| 1,56265576  | 0,00108 | 1,387992719 | 0,0048  | GUCY1B3    | guanylate cyclase 1, soluble, beta 3                                                           |
| 0,716480825 | 0,03493 | 0,721464343 | 0,00475 | GUF1       | GUF1 GTPase homolog (S. cerevisiae)                                                            |
| 0,525222272 | 0,00105 | 0,71946679  | 0       | GUF1       | GUF1 GTPase homolog (S. cerevisiae)                                                            |
| 1,650610817 | 0,02613 | 2,064797071 | 0,00038 | GUSBP11    | glucuronidase, beta pseudogene 11                                                              |
| 1,71356391  | 0,00005 | 1,516767545 | 0,00008 | GVINP1     | GTPase, very large interferon inducible pseudogene 1                                           |
| 1,830198336 | 0,00893 | 1,51887169  | 0,01163 | GZMB       | granzyme B (granzyme 2, cytotoxic T-lymphocyte-associated serine esterase 1)                   |
| 1,501079098 | 0,00112 | 1,155085785 | 0,02117 | GZMH       | granzyme H (cathepsin G-like 2, protein h-CCPX)                                                |
| 1,977941833 | 0,00008 | 1,512567997 | 0,01183 | GZMK       | granzyme K (granzyme 3; trypsinase II)                                                         |
| 0,806082831 | 0,01712 | 0,831045862 | 0,0022  | H2AFY      | H2A histone family, member Y                                                                   |
| 0,666187413 | 0,01117 | 0,707106781 | 0,00005 | H3F3B      | H3 histone, family 3B (H3.3B)                                                                  |
| 0,694477568 | 0,00138 | 0,831045862 | 0,02123 | H3F3B      | H3 histone, family 3B (H3.3B)                                                                  |
| 1,453972517 | 0,01094 | 1,458009379 | 0       | H6PD       | hexose-6-phosphate dehydrogenase (glucose 1-dehydrogenase)                                     |
| 0,77916458  | 0,02256 | 0,868140228 | 0,01069 | HACL1      | 2-hydroxyacyl-CoA lyase 1                                                                      |
| 1,38991822  | 0,01784 | 1,312211255 | 0,00003 | HAPLN3     | hyaluronan and proteoglycan link protein 3                                                     |
| 0,76684133  | 0,01612 | 0,688725023 | 0,00001 | HAUS2      | HAUS augmin-like complex, subunit 2                                                            |
| 1,417157397 | 0,00206 | 1,217566019 | 0,00619 | HAVCR2     | hepatitis A virus cellular receptor 2                                                          |
| 1,2397077   | 0,01668 | 1,184271612 | 0,00063 | HBBP1      | hemoglobin, beta pseudogene 1                                                                  |
| 1,62113024  | 0,03255 | 1,399585866 | 0,00936 | HBD        | hemoglobin, delta                                                                              |
| 0,728499557 | 0,01845 | 0,771105413 | 0,00607 | HCG18      | HLA complex group 18 (non-protein coding)                                                      |
| 1,830198336 | 0,00049 | 1,760518027 | 0,00002 | HCK        | hemopoietic cell kinase                                                                        |
| 2,211461307 | 0,00005 | 2,09216988  | 0,00001 | HCLS1      | hematopoietic cell-specific Lyn substrate 1                                                    |
| 1,418140036 | 0,00958 | 1,282536603 | 0,00275 | HCST       | hematopoietic cell signal transducer                                                           |
| 1,232852325 | 0,03676 | 1,198309021 | 0,00156 | HDAC6      | histone deacetylase 6                                                                          |
| 2,182527754 | 0,00378 | 1,366040257 | 0,00163 | HDAC9      | histone deacetylase 9                                                                          |
| 0,675018993 | 0,00309 | 0,867538687 | 0,00229 | HDDC2      | HD domain containing 2                                                                         |
| 0,595841287 | 0,00644 | 0,76101669  | 0,00119 | HDDC2      | HD domain containing 2                                                                         |
| 0,753145233 | 0,00574 | 0,767373048 | 0,00218 | HEATR1     | HEAT repeat containing 1                                                                       |
| 0,722966147 | 0,00266 | 0,717474767 | 0,00007 | HEATR1     | HEAT repeat containing 1                                                                       |
| 0,654289036 | 0,00019 | 0,786762445 | 0,00382 | HEBP2      | heme binding protein 2                                                                         |
| 0,609627547 | 0,00254 | 0,784040454 | 0,00261 | HECA       | headcase homolog (Drosophila)                                                                  |
| 0,375009747 | 0,02136 | 0,61301743  | 0,00373 | HECTD1     | HECT domain containing 1                                                                       |
| 0,597081594 | 0,00426 | 0,715984371 | 0,0031  | HECTD1     | HECT domain containing 1                                                                       |
| 0,592135806 | 0,00955 | 0,732042848 | 0,00279 | HECTD1     | HECT domain containing 1                                                                       |
| 0,503128912 | 0,00075 | 0,556710809 | 0,00005 | HECTD1     | HECT domain containing 1                                                                       |
| 1,374588696 | 0,02499 | 1,28788163  | 0,00291 | HECW1      | HECT, C2 and WW domain containing E3 ubiquitin protein ligase 1                                |
| 1,488645255 | 0,00743 | 1,265756594 | 0,00636 | HENMT1     | HEN1 methyltransferase homolog 1 (Arabidopsis)                                                 |
| 1,744725412 | 0,01375 | 1,237132479 | 0,02993 | HEPH       | hephaestin                                                                                     |
| 2,156960863 | 0,00009 | 1,802500925 | 0,00015 | HERPUD1    | homocysteine-inducible, endoplasmic reticulum stress-inducible, ubiquitin-like domain member 1 |
| 0,60583633  | 0,00145 | 0,796640096 | 0,0096  | HES5       | hairly and enhancer of split 5 (Drosophila)                                                    |
| 1,244874235 | 0,0257  | 1,314031627 | 0,00031 | HEXDC      | hexosaminidase (glycosyl hydrolase family 20, catalytic domain) containing                     |
| 0,755759964 | 0,00536 | 0,791137301 | 0,00052 | HEXIM1     | hexamethylene bis-acetamide inducible 1                                                        |
| 1,487613762 | 0,01406 | 1,208317843 | 0,02292 | HEY2       | hairly/enhancer-of-split related with YRPW motif 2                                             |
| 1,43296165  | 0,00725 | 1,383190629 | 0,00054 | HEY2       | hairly/enhancer-of-split related with YRPW motif 2                                             |
| 1,48246701  | 0,00134 | 1,161508732 | 0,04335 | HEYL       | hairly/enhancer-of-split related with YRPW motif-like                                          |
| 1,424050196 | 0,00264 | 1,17772279  | 0,00833 | HFE        | hemochromatosis                                                                                |
| 1,207480591 | 0,03761 | 1,180992661 | 0,01034 | HFE        | hemochromatosis                                                                                |
| 1,445932295 | 0,00438 | 1,240567298 | 0,00574 | HFE        | hemochromatosis                                                                                |
| 1,313121125 | 0,04207 | 1,204137381 | 0,00256 | HFE        | hemochromatosis                                                                                |
| 1,850608856 | 0,00172 | 1,312211255 | 0,00113 | HHEX       | hematopoietically expressed homeobox                                                           |
| 1,811267966 | 0,00028 | 1,345367209 | 0,0023  | HHEX       | hematopoietically expressed homeobox                                                           |
| 0,55632506  | 0,00419 | 0,712025098 | 0,0026  | HIBCH      | 3-hydroxyisobutyryl-CoA hydrolase                                                              |
| 0,613867842 | 0,00876 | 0,783497187 | 0,00036 | HIBCH      | 3-hydroxyisobutyryl-CoA hydrolase                                                              |
| 1,513616793 | 0,03023 | 1,266634254 | 0,00371 | HIC1       | hypermethylated in cancer 1                                                                    |
| 0,562919293 | 0,00933 | 0,784040454 | 0,00083 | HIF1AN     | hypoxia inducible factor 1, alpha subunit inhibitor                                            |
| 1,349102534 | 0,01201 | 1,335148303 | 0,00309 | HIF3A      | hypoxia inducible factor 3, alpha subunit                                                      |
| 0,776468875 | 0,00452 | 0,820741609 | 0,00816 | HINT1      | histidine triad nucleotide binding protein 1                                                   |
| 0,763129604 | 0,00603 | 0,838568184 | 0,01373 | HINT1      | histidine triad nucleotide binding protein 1                                                   |
| 0,826450318 | 0,02947 | 0,855595026 | 0,00805 | HINT1      | histidine triad nucleotide binding protein 1                                                   |
| 0,60583633  | 0,00373 | 0,522317881 | 0,0001  | HINT3      | histidine triad nucleotide binding protein 3                                                   |
| 0,797192477 | 0,02119 | 0,798851916 | 0,01623 | HIRA       | HIR histone cell cycle regulation defective homolog A (S. cerevisiae)                          |
| 0,628071191 | 0,02116 | 0,87175824  | 0,04328 | HK1        | hexokinase 1                                                                                   |
| 1,489677463 | 0,00337 | 1,374588696 | 0,00018 | HLA-DMB    | major histocompatibility complex, class II, DM beta                                            |
| 1,491744027 | 0,00141 | 1,293248932 | 0,0011  | HLA-DOA    | major histocompatibility complex, class II, DO alpha                                           |
| 2,814736751 | 0,00001 | 2,535025044 | 0       | HLA-DOB    | major histocompatibility complex, class II, DO beta                                            |
| 0,733566672 | 0,02735 | 0,810003474 | 0,01307 | HLA-DQB2   | major histocompatibility complex, class II, DQ beta 2                                          |
| 1,381274448 | 0,00654 | 1,285206337 | 0,00361 | HLA-F      | major histocompatibility complex, class I, F                                                   |
| 0,413225159 | 0,00127 | 0,538493188 | 0,00104 | HLF        | hepatic leukemia factor                                                                        |
| 0,432568345 | 0,00036 | 0,580351957 | 0,00028 | HLF        | hepatic leukemia factor                                                                        |
| 0,400812665 | 0,00007 | 0,551334582 | 0,00016 | HLF        | hepatic leukemia factor                                                                        |
| 1,486582984 | 0,00109 | 1,332374825 | 0,00023 | HLX        | H2.0-like homeobox                                                                             |
| 0,396941965 | 0,00207 | 0,528142813 | 0,00004 | HMGCR      | 3-hydroxy-3-methylglutaryl-CoA reductase                                                       |
| 0,43951978  | 0,01473 | 0,552865327 | 0       | HMGCR      | 3-hydroxy-3-methylglutaryl-CoA reductase                                                       |
| 0,793883931 | 0,03284 | 0,864537231 | 0,01301 | HMGN1      | high mobility group nucleosome binding domain 1                                                |
| 1,516767545 | 0,00927 | 1,417157397 | 0,00171 | HMH1       | histocompatibility (minor) HA-1                                                                |
| 0,698823486 | 0,00284 | 0,77271055  | 0,00007 | HN1        | hematological and neurological expressed 1                                                     |
| 0,686342216 | 0,02519 | 0,872362706 | 0,02468 | HNRNPA2B1  | heterogeneous nuclear ribonucleoprotein A2/B1                                                  |
| 0,608361179 | 0,01718 | 0,833353207 | 0,01021 | HNRNPA3    | heterogeneous nuclear ribonucleoprotein A3                                                     |
| 0,712025098 | 0,04278 | 0,799960128 | 0,00955 | HNRNPH3    | heterogeneous nuclear ribonucleoprotein H3 (2H9)                                               |
| 0,665725807 | 0,00848 | 0,857376037 | 0,01394 | HNRNPM     | heterogeneous nuclear ribonucleoprotein M                                                      |
| 0,673616788 | 0,0292  | 0,65747138  | 0,00241 | HNRNPU     | heterogeneous nuclear ribonucleoprotein U (scaffold attachment factor A)                       |
| 0,579146403 | 0,00389 | 0,752623374 | 0,00463 | HNRNPU-AS1 | HNRNPU antisense RNA 1 (non-protein coding)                                                    |
| 0,72597914  | 0,02584 | 0,828744904 | 0,00325 | HNRPDL     | heterogeneous nuclear ribonucleoprotein D-like                                                 |
| 0,576742803 | 0,02357 | 0,787853886 | 0,00171 | HNRPDL     | heterogeneous nuclear ribonucleoprotein D-like                                                 |
| 0,680185426 | 0,00526 | 0,814507563 | 0,00227 | HNRPDL     | heterogeneous nuclear ribonucleoprotein D-like                                                 |
| 0,586417475 | 0,03168 | 0,698339266 | 0,00003 | HOMER1     | homer homolog 1 (Drosophila)                                                                   |
| 0,509445598 | 0,0047  | 0,667111585 | 0,00338 | HOMER2     | homer homolog 2 (Drosophila)                                                                   |
| 0,517991382 | 0,00402 | 0,586011142 | 0,00005 | HOOK1      | hook homolog 1 (Drosophila)                                                                    |
| 0,463294031 | 0,01182 | 0,581560021 | 0,00004 | HOOK1      | hook homolog 1 (Drosophila)                                                                    |
| 0,526315577 | 0,00285 | 0,820172911 | 0,01272 | HOOK2      | hook homolog 2 (Drosophila)                                                                    |
| 0,631126016 | 0,00607 | 0,764718139 | 0,00154 | HOPX       | HOP homeobox                                                                                   |
| 1,261377409 | 0,00692 | 1,243149669 | 0,00092 | HOXA3      | homeobox A3                                                                                    |
| 1,707635429 | 0,00003 | 1,320422841 | 0,00157 | HOXB2      | homeobox B2                                                                                    |
| 1,505246747 | 0,01872 | 1,285206337 | 0,00063 | HOXB3      | homeobox B3                                                                                    |
| 1,32408891  | 0,02238 | 1,312211255 | 0,00033 | HOXB7      | homeobox B7                                                                                    |
| 1,218410264 | 0,04746 | 1,374588696 | 0       | HOXB7      | homeobox B7                                                                                    |
| 0,357992185 | 0,00123 | 0,508387337 | 0,00148 | HPGD       | hydroxyprostaglandin dehydrogenase 15-(NAD)                                                    |

|             |         |             |         |          |                                                                                           |
|-------------|---------|-------------|---------|----------|-------------------------------------------------------------------------------------------|
| 0,3972172   | 0,00156 | 0,557483109 | 0,00099 | HPGD     | hydroxyprostaglandin dehydrogenase 15-(NAD)                                               |
| 0,396666922 | 0,00288 | 0,508387337 | 0,00085 | HPGD     | hydroxyprostaglandin dehydrogenase 15-(NAD)                                               |
| 0,369078601 | 0,00008 | 0,540362701 | 0,00604 | HPGD     | hydroxyprostaglandin dehydrogenase 15-(NAD)                                               |
| 0,735603373 | 0,01435 | 0,823591017 | 0,00465 | HPS4     | Hermansky-Pudlak syndrome 4                                                               |
| 0,618995145 | 0,02094 | 0,61813763  | 0,00001 | HPSE     | heparanase                                                                                |
| 0,615572207 | 0,00101 | 0,796088099 | 0,00378 | HR       | hairless homolog (mouse)                                                                  |
| 0,636397468 | 0,01081 | 0,554016174 | 0,00001 | HRSLS    | HRS-like suppressor                                                                       |
| 0,613867842 | 0,00627 | 0,757858283 | 0,02464 | HRSP12   | heat-responsive protein 12                                                                |
| 1,444930398 | 0,00751 | 1,240567298 | 0,01236 | HS3ST2   | heparan sulfate (glucosamine) 3-O-sulfotransferase 2                                      |
| 1,481439798 | 0,00716 | 1,178539408 | 0,04084 | HS3ST4   | heparan sulfate (glucosamine) 3-O-sulfotransferase 4                                      |
| 0,412652704 | 0,00074 | 0,7031966   | 0,02847 | HS3ST6   | heparan sulfate (glucosamine) 3-O-sulfotransferase 6                                      |
| 0,699308041 | 0,01109 | 0,803850991 | 0,00018 | HSPB1    | heat shock factor binding protein 1                                                       |
| 1,80000386  | 0,00487 | 1,612165663 | 0,00003 | HSD11B1  | hydroxysteroid (11-beta) dehydrogenase 1                                                  |
| 0,793883931 | 0,03415 | 0,844400887 | 0,00539 | HSD11B2  | hydroxysteroid (11-beta) dehydrogenase 2                                                  |
| 1,673652485 | 0,02043 | 1,307671349 | 0,00968 | HSD17B11 | hydroxysteroid (17-beta) dehydrogenase 11                                                 |
| 0,67689314  | 0,02327 | 0,847332435 | 0,01739 | HSD17B4  | hydroxysteroid (17-beta) dehydrogenase 4                                                  |
| 0,688725023 | 0,00169 | 0,77271055  | 0,00015 | HSDL1    | hydroxysteroid dehydrogenase like 1                                                       |
| 0,777546036 | 0,03769 | 0,78024548  | 0,00605 | HSF2     | heat shock transcription factor 2                                                         |
| 1,232852325 | 0,04616 | 1,112650121 | 0,03274 | HSF5     | heat shock transcription factor family member 5                                           |
| 2,097978655 | 0,00008 | 1,797510253 | 0,00006 | HS2D     | hematopoietic SH2 domain containing                                                       |
| 0,635515845 | 0,01551 | 0,898755127 | 0,03483 | HSP90AA1 | heat shock protein 90kDa alpha (cytosolic), class A member 1                              |
| 2,458877735 | 0,00048 | 1,564823563 | 0,00875 | HSPA13   | heat shock protein 70kDa family, member 13                                                |
| 3,394031607 | 0,00004 | 1,990319444 | 0,00087 | HSPA13   | heat shock protein 70kDa family, member 13                                                |
| 0,632439771 | 0,01179 | 0,68491649  | 0       | HSPA14   | heat shock 70kDa protein 14                                                               |
| 0,592135806 | 0,00128 | 0,737134609 | 0,00274 | HSPA2    | heat shock 70kDa protein 2                                                                |
| 0,527776859 | 0,00692 | 0,616853585 | 0,00102 | HSPA4L   | heat shock 70kDa protein 4-like                                                           |
| 0,551334582 | 0,00089 | 0,5913155   | 0,00006 | HSPB8    | heat shock 22kDa protein 8                                                                |
| 0,746389192 | 0,04494 | 0,832775771 | 0,00021 | HSPD1    | heat shock 60kDa protein 1 (chaperonin)                                                   |
| 0,754712984 | 0,02701 | 0,795536484 | 0,00052 | HSPE1    | heat shock 10kDa protein 1 (chaperonin 10)                                                |
| 0,555554364 | 0,00518 | 0,794985251 | 0,01559 | HTATIP2  | HIV-1 Tat interactive protein 2, 30kDa                                                    |
| 0,492433221 | 0,00001 | 0,711531731 | 0,00014 | HTATIP2  | HIV-1 Tat interactive protein 2, 30kDa                                                    |
| 0,593779833 | 0,00449 | 0,733566672 | 0,00109 | HTATSF1  | HIV-1 Tat specific factor 1                                                               |
| 0,654289036 | 0,03385 | 0,734584317 | 0       | HTATSF1  | HIV-1 Tat specific factor 1                                                               |
| 1,30224419  | 0,0342  | 1,31494276  | 0,00009 | HTRA3    | HtrA serine peptidase 3                                                                   |
| 1,347233577 | 0,0025  | 1,244874235 | 0,00658 | HYI      | hydroxyppyruvate isomerase (putative)                                                     |
| 0,754712984 | 0,03105 | 0,819036698 | 0,00317 | HYLS1    | hydroletharus syndrome 1                                                                  |
| 0,599154511 | 0,00175 | 0,746906729 | 0,00955 | IAH1     | isoamyl acetate-hydrolyzing esterase 1 homolog (S. cerevisiae)                            |
| 0,660669203 | 0,02791 | 0,786762445 | 0,00033 | IARS2    | isoleucyl-tRNA synthetase 2, mitochondrial                                                |
| 1,278099363 | 0,02127 | 1,215036792 | 0,00372 | ICA1L    | islet cell autoantigen 1,69kDa-like                                                       |
| 1,469168633 | 0,01149 | 1,512567997 | 0,00007 | ICAM1    | intercellular adhesion molecule 1                                                         |
| 2,217601287 | 0,0122  | 2,326240083 | 0       | ICAM2    | intercellular adhesion molecule 2                                                         |
| 2,199232299 | 0,00081 | 2,26891097  | 0       | ICAM2    | intercellular adhesion molecule 2                                                         |
| 2,229932437 | 0,00145 | 2,176484883 | 0       | ICAM3    | intercellular adhesion molecule 3                                                         |
| 1,545421099 | 0,00064 | 1,270150983 | 0,00068 | ICAM4    | intercellular adhesion molecule 4 (Landsteiner-Wiener blood group)                        |
| 0,573553512 | 0,01719 | 0,683967652 | 0,00008 | ICK      | intestinal cell (MAK-like) kinase                                                         |
| 0,763129604 | 0,01705 | 0,791137301 | 0,00136 | ICT1     | immature colon carcinoma transcript 1                                                     |
| 0,656560563 | 0,01886 | 0,848507902 | 0,01852 | IDH3B    | isocitrate dehydrogenase 3 (NAD+) beta                                                    |
| 0,716977624 | 0,01749 | 0,765778999 | 0,00054 | IDI1     | isopentenyl-diphosphate delta isomerase 1                                                 |
| 0,675018993 | 0,01048 | 0,733566672 | 0,00008 | IDI1     | isopentenyl-diphosphate delta isomerase 1                                                 |
| 0,771640088 | 0,01444 | 0,759962428 | 0,00015 | IER5     | immediate early response 5                                                                |
| 1,53261996  | 0,0032  | 1,399585866 | 0,00064 | IFFO1    | intermediate filament family orphan 1                                                     |
| 0,340800652 | 0,00001 | 0,573553512 | 0       | IFFO2    | intermediate filament family orphan 2                                                     |
| 0,425726854 | 0,01889 | 0,654289036 | 0,03753 | IFI27    | interferon, alpha-inducible protein 27                                                    |
| 1,53261996  | 0,01371 | 1,663244197 | 0,00003 | IFI30    | interferon, gamma-inducible protein 30                                                    |
| 1,365093718 | 0,04271 | 1,110338834 | 0,02028 | IFIT5    | interferon-induced protein with tetratricopeptide repeats 5                               |
| 1,299539062 | 0,02631 | 1,191682575 | 0,01531 | IFITM1   | interferon induced transmembrane protein 1 (9-27)                                         |
| 1,240567298 | 0,02203 | 1,102669163 | 0,02128 | IFNA1    | interferon, alpha 1                                                                       |
| 1,976571303 | 0,00017 | 1,634670657 | 0,00005 | IFNAR2   | interferon (alpha, beta and omega) receptor 2                                             |
| 2,131693472 | 0,00001 | 1,6724928   | 0,00003 | IFNAR2   | interferon (alpha, beta and omega) receptor 2                                             |
| 0,654742712 | 0,0215  | 0,714992493 | 0,00117 | IFRD1    | interferon-related developmental regulator 1                                              |
| 0,575544746 | 0,03054 | 0,680185426 | 0,00037 | IFT57    | intraflagellar transport 57 homolog (Chlamydomonas)                                       |
| 0,579146403 | 0,02668 | 0,741747467 | 0,00007 | IGF1R    | insulin-like growth factor 1 receptor                                                     |
| 1,207480591 | 0,02384 | 1,144724161 | 0,02262 | IGF2BP1  | insulin-like growth factor 2 mRNA binding protein 1                                       |
| 1,495885758 | 0,0109  | 1,510472586 | 0,00029 | IGFBP5   | insulin-like growth factor binding protein 5                                              |
| 1,543280175 | 0,00661 | 1,544350266 | 0,00585 | IGFBP5   | insulin-like growth factor binding protein 5                                              |
| 1,408344227 | 0,0369  | 1,377450046 | 0,01091 | IGFBP7   | insulin-like growth factor binding protein 7                                              |
| 1,554014538 | 0,0014  | 1,32592576  | 0,0012  | IGFBP7   | insulin-like growth factor binding protein 7                                              |
| 1,386069886 | 0,03006 | 1,462057448 | 0,00003 | IGFLR1   | IGF-like family receptor 1                                                                |
| 1,383190629 | 0,00411 | 1,212512819 | 0,0037  | IGH@     | immunoglobulin heavy locus                                                                |
| 2,070529848 | 0,00336 | 1,972465409 | 0,00007 | IGHA1    | immunoglobulin heavy constant alpha 1                                                     |
| 1,418140036 | 0,02555 | 1,337000495 | 0,00397 | IGHA1    | immunoglobulin heavy constant alpha 1                                                     |
| 4,036206535 | 0,00655 | 5,176582618 | 0,00005 | IGHD     | immunoglobulin heavy constant delta                                                       |
| 1,527317498 | 0,02178 | 1,53261996  | 0,00154 | IGHG     | immunoglobulin heavy constant epsilon                                                     |
| 1,498999602 | 0,02726 | 1,504203751 | 0,00031 | IGHG1    | immunoglobulin heavy constant gamma 1 (G1m marker)                                        |
| 1,898684242 | 0,04226 | 1,995845438 | 0,00049 | IGHG1    | immunoglobulin heavy constant gamma 1 (G1m marker)                                        |
| 3,30351066  | 0,00135 | 4,362030931 | 0,00001 | IGHM     | immunoglobulin heavy constant mu                                                          |
| 2,278366754 | 0,00008 | 1,549711862 | 0,01138 | IGHM     | immunoglobulin heavy constant mu                                                          |
| 3,678200185 | 0,0136  | 5,219819791 | 0,00004 | IGHM     | immunoglobulin heavy constant mu                                                          |
| 1,927859615 | 0,00671 | 1,393777239 | 0,00322 | IGHV1-69 | immunoglobulin heavy variable 1-69                                                        |
| 2,11696879  | 0,00129 | 2,0363704   | 0,00949 | IGJ      | immunoglobulin J polypeptide, linker protein for immunoglobulin alpha and mu polypeptides |
| 1,437936533 | 0,02807 | 1,584469622 | 0,00529 | IGKC     | immunoglobulin kappa constant                                                             |
| 2,399942765 | 0,01463 | 3,487032958 | 0,00011 | IGKC     | immunoglobulin kappa constant                                                             |
| 3,991690876 | 0,00042 | 4,158317741 | 0,00009 | IGKC     | immunoglobulin kappa constant                                                             |
| 2,25792881  | 0,00232 | 2,526254524 | 0,00002 | IGKV1-5  | immunoglobulin kappa variable 1-5                                                         |
| 3,175535724 | 0,02172 | 5,521269414 | 0,00003 | IGKV1-5  | immunoglobulin kappa variable 1-5                                                         |
| 2,615342697 | 0,00835 | 2,620786808 | 0,00006 | IGKV1D-8 | immunoglobulin kappa variable 1D-8                                                        |
| 3,443796753 | 0,03276 | 5,031539887 | 0,00005 | IGKV4-1  | immunoglobulin kappa variable 4-1                                                         |
| 3,655325801 | 0,00506 | 4,556733509 | 0,00006 | IGL@     | immunoglobulin lambda locus                                                               |
| 2,624422509 | 0,00586 | 1,945309895 | 0,00904 | IGL@     | immunoglobulin lambda locus                                                               |
| 2,928171392 | 0,00016 | 3,06523992  | 0,00011 | IGL@     | immunoglobulin lambda locus                                                               |
| 2,854029011 | 0,00024 | 2,822551687 | 0,00001 | IGLC1    | immunoglobulin lambda constant 1 (Mcg marker)                                             |
| 2,928171392 | 0,01664 | 4,783279187 | 0,00002 | IGLJ3    | immunoglobulin lambda joining 3                                                           |
| 2,911979098 | 0,01308 | 4,681594566 | 0,00002 | IGLJ3    | immunoglobulin lambda joining 3                                                           |
| 1,367935304 | 0,00754 | 1,30224419  | 0,00226 | IGLJ3    | immunoglobulin lambda joining 3                                                           |
| 1,698192493 | 0,00429 | 2,286276671 | 0,00019 | IGLL3P   | immunoglobulin lambda-like polypeptide 3, pseudogene                                      |
| 3,195407666 | 0,00558 | 4,678350656 | 0,00001 | IGLV1-40 | immunoglobulin lambda variable 1-40                                                       |
| 1,483494934 | 0,02226 | 1,422077411 | 0,00314 | IGLV1-44 | immunoglobulin lambda variable 1-44                                                       |
| 2,936301272 | 0,00364 | 3,331103084 | 0,00025 | IGLV3-19 | immunoglobulin lambda variable 3-19                                                       |

|             |         |             |         |          |                                                                      |
|-------------|---------|-------------|---------|----------|----------------------------------------------------------------------|
| 2,515769944 | 0,00114 | 2,061936638 | 0,00008 | IGLV4-60 | immunoglobulin lambda variable 4-60                                  |
| 0,774319028 | 0,03266 | 0,759435845 | 0,00005 | IGSF3    | immunoglobulin superfamily, member 3                                 |
| 1,281647924 | 0,01985 | 1,346300069 | 0,00725 | IGSF6    | immunoglobulin superfamily, member 6                                 |
| 0,582770599 | 0,01616 | 0,709070018 | 0,00173 | IGSF9    | immunoglobulin superfamily, member 9                                 |
| 0,710053679 | 0,03942 | 0,85086373  | 0,00063 | IK       | IK cytokine, down-regulator of HLA II                                |
| 1,519924856 | 0,00469 | 1,255271991 | 0,04938 | IKBIP    | IKKB interacting protein                                             |
| 1,559409685 | 0,00121 | 1,260503392 | 0,0349  | IKZF1    | IKAROS family zinc finger 1 (Ikaros)                                 |
| 1,392811481 | 0,03283 | 1,531557997 | 0,00008 | IKZF1    | IKAROS family zinc finger 1 (Ikaros)                                 |
| 1,50733491  | 0,00731 | 1,402499251 | 0,00433 | IKZF1    | IKAROS family zinc finger 1 (Ikaros)                                 |
| 2,01670491  | 0,00001 | 1,561572985 | 0,00007 | IKZF1    | IKAROS family zinc finger 1 (Ikaros)                                 |
| 2,983488053 | 0,00013 | 2,063366359 | 0,00011 | IKZF1    | IKAROS family zinc finger 1 (Ikaros)                                 |
| 1,89736863  | 0,00005 | 1,583371732 | 0,00001 | IKZF3    | IKAROS family zinc finger 3 (Aiolos)                                 |
| 2,019502595 | 0,00006 | 1,322254605 | 0,00418 | IKZF3    | IKAROS family zinc finger 3 (Aiolos)                                 |
| 1,275444392 | 0,01007 | 1,132098902 | 0,038   | IL10     | interleukin 10                                                       |
| 2,966989868 | 0,00001 | 2,615342697 | 0       | IL10RA   | interleukin 10 receptor, alpha                                       |
| 1,48246701  | 0,00091 | 1,305859787 | 0,00285 | IL12RB1  | interleukin 12 receptor, beta 1                                      |
| 1,300440147 | 0,01005 | 1,191682575 | 0,02345 | IL12RB1  | interleukin 12 receptor, beta 1                                      |
| 0,643494624 | 0,01949 | 0,76684133  | 0,0001  | IL13RA1  | interleukin 13 receptor, alpha 1                                     |
| 0,585199321 | 0,00371 | 0,726482525 | 0,00567 | IL13RA1  | interleukin 13 receptor, alpha 1                                     |
| 1,264003098 | 0,01201 | 1,160703914 | 0,00766 | IL16     | interleukin 16                                                       |
| 2,572194967 | 0,00003 | 1,854461093 | 0,00002 | IL16     | interleukin 16                                                       |
| 1,445932295 | 0,00364 | 1,29145735  | 0,00807 | IL16     | interleukin 16                                                       |
| 1,313121125 | 0,01927 | 1,235418637 | 0,00097 | IL17RB   | interleukin 17 receptor B                                            |
| 0,7031966   | 0,0005  | 0,840896415 | 0,04222 | IL17RC   | interleukin 17 receptor C                                            |
| 0,453130969 | 0,0042  | 0,687294348 | 0,00363 | IL18     | interleukin 18 (interferon-gamma-inducing factor)                    |
| 1,392811481 | 0,02938 | 1,336074078 | 0,00174 | IL18BP   | interleukin 18 binding protein                                       |
| 1,227735684 | 0,01244 | 1,180992661 | 0,02006 | IL18BP   | interleukin 18 binding protein                                       |
| 1,477338064 | 0,00109 | 1,179356592 | 0,0078  | IL18RAP  | interleukin 18 receptor accessory protein                            |
| 1,662091723 | 0,00025 | 1,478362431 | 0,03176 | IL19     | interleukin 19                                                       |
| 1,72428709  | 0,0004  | 1,537940831 | 0,02399 | IL1B     | interleukin 1, beta                                                  |
| 1,783857039 | 0,0002  | 1,543280175 | 0,02056 | IL1B     | interleukin 1, beta                                                  |
| 1,212512819 | 0,0128  | 1,185092771 | 0,00858 | IL1RL1   | interleukin 1 receptor-like 1                                        |
| 1,215879283 | 0,03089 | 1,106497353 | 0,02397 | IL1RL1   | interleukin 1 receptor-like 1                                        |
| 0,656560563 | 0,00438 | 0,65747138  | 0,00007 | IL1RL2   | interleukin 1 receptor-like 2                                        |
| 0,483638165 | 0,00417 | 0,852044095 | 0,01935 | IL20RB   | interleukin 20 receptor beta                                         |
| 1,416175438 | 0,00285 | 1,163120042 | 0,00769 | IL21R    | interleukin 21 receptor                                              |
| 1,665551542 | 0,00006 | 1,401527449 | 0,00003 | IL21R    | interleukin 21 receptor                                              |
| 1,554014538 | 0,0044  | 1,275444392 | 0,03387 | IL21R    | interleukin 21 receptor                                              |
| 0,632439771 | 0,00876 | 0,773246337 | 0,0062  | IL22RA1  | interleukin 22 receptor, alpha 1                                     |
| 2,096524951 | 0,00148 | 1,701727459 | 0,00035 | IL24     | interleukin 24                                                       |
| 1,592176198 | 0,00679 | 1,337927555 | 0,02735 | IL27RA   | interleukin 27 receptor, alpha                                       |
| 1,424050196 | 0,01274 | 1,352848231 | 0,00022 | IL28A    | interleukin 28A (interferon, lambda 2)                               |
| 1,265756594 | 0,02926 | 1,191682575 | 0,01896 | IL2RA    | interleukin 2 receptor, alpha                                        |
| 1,667862088 | 0,00171 | 1,305859787 | 0,00773 | IL2RA    | interleukin 2 receptor, alpha                                        |
| 1,777685362 | 0,00108 | 1,458009379 | 0,00004 | IL2RB    | interleukin 2 receptor, beta                                         |
| 1,859609885 | 0,00583 | 2,131693472 | 0       | IL2RG    | interleukin 2 receptor, gamma                                        |
| 0,69399636  | 0,04025 | 0,84323111  | 0,01203 | IL31RA   | interleukin 31 receptor A                                            |
| 0,489031737 | 0,00258 | 0,649769531 | 0,00121 | IL36RN   | interleukin 36 receptor antagonist                                   |
| 1,450952208 | 0,00055 | 1,262252032 | 0,00134 | IL5RA    | interleukin 5 receptor, alpha                                        |
| 2,018103268 | 0,00071 | 1,554014538 | 0,01723 | IL6      | interleukin 6 (interferon, beta 2)                                   |
| 0,751059963 | 0,04217 | 0,862741345 | 0,00634 | IMMT     | inner membrane protein, mitochondrial                                |
| 0,466193243 | 0,00326 | 0,713507253 | 0,00617 | IMPACT   | inositol(myo)-1(or 4)-monophosphatase 2                              |
| 0,706616822 | 0,01466 | 0,727490342 | 0,01886 | IMPACT   | Impact homolog (mouse)                                               |
| 0,753145233 | 0,03624 | 0,886996305 | 0,0103  | IMPAD1   | inositol monophosphatase domain containing 1                         |
| 0,693515485 | 0,01253 | 0,735093668 | 0,00821 | IMPAD1   | inositol monophosphatase domain containing 1                         |
| 0,61985385  | 0,00076 | 0,740719899 | 0,00032 | INADL    | InaD-like (Drosophila)                                               |
| 0,57236208  | 0,04263 | 0,644834125 | 0,00015 | INADL    | InaD-like (Drosophila)                                               |
| 0,7031966   | 0,04187 | 0,733566672 | 0,00026 | INADL    | InaD-like (Drosophila)                                               |
| 1,261377409 | 0,02428 | 1,197478705 | 0,00056 | INF2     | inverted formin, FH2 and WH2 domain containing                       |
| 0,58643569  | 0,00629 | 0,643494624 | 0       | ING2     | inhibitor of growth family, member 2                                 |
| 1,350037985 | 0,04048 | 1,275444392 | 0,01389 | INMT     | indolethylamine N-methyltransferase                                  |
| 0,81056512  | 0,04662 | 0,866937564 | 0,01574 | INO80    | INO80 homolog (S. cerevisiae)                                        |
| 0,653382627 | 0,00109 | 0,802181166 | 0,00028 | INO80D   | INO80 complex subunit D                                              |
| 1,416175438 | 0,01944 | 1,488645255 | 0,00134 | INPP4A   | inositol polyphosphate-4-phosphatase, type I, 107kDa                 |
| 1,220946513 | 0,02068 | 1,193335743 | 0,00107 | INPP4A   | inositol polyphosphate-4-phosphatase, type I, 107kDa                 |
| 1,893427262 | 0,00216 | 1,361314116 | 0,02394 | INPP4A   | inositol polyphosphate-4-phosphatase, type I, 107kDa                 |
| 1,328685814 | 0,00937 | 1,269270886 | 0,00035 | INPP5D   | inositol polyphosphate-5-phosphatase, 145kDa                         |
| 1,56265576  | 0,01944 | 1,491744027 | 0,00001 | INPP5D   | inositol polyphosphate-5-phosphatase, 145kDa                         |
| 1,468150636 | 0,00449 | 1,28788163  | 0,00302 | INSR     | insulin receptor                                                     |
| 0,740719899 | 0,00255 | 0,8362464   | 0,00782 | INTS10   | integrator complex subunit 10                                        |
| 0,711531731 | 0,01625 | 0,855002178 | 0,02928 | INTS10   | integrator complex subunit 10                                        |
| 0,626332219 | 0,02551 | 0,784040454 | 0,00638 | INTS12   | integrator complex subunit 12                                        |
| 0,614719434 | 0,00333 | 0,745355193 | 0,00028 | INTS7    | integrator complex subunit 7                                         |
| 0,76418826  | 0,02094 | 0,884540435 | 0,03526 | IPOS     | importin 5                                                           |
| 0,637722196 | 0,01523 | 0,793333843 | 0,00384 | IPO7     | importin 7                                                           |
| 0,617281303 | 0,00234 | 0,702222438 | 0,00019 | IPPK     | inositol 1,3,4,5,6-pentakisphosphate 2-kinase                        |
| 1,840375301 | 0,01278 | 1,613283518 | 0,00002 | IPW      | imprinted in Prader-Willi syndrome (non-protein coding)              |
| 1,424050196 | 0,00231 | 1,155085785 | 0,04038 | IQCA1    | IQ motif containing with AAA domain 1                                |
| 1,508380077 | 0,0036  | 1,224336392 | 0,03344 | IQCG     | IQ motif containing G                                                |
| 0,554784736 | 0,02773 | 0,846158597 | 0,00134 | IQGAP1   | IQ motif containing GTPase activating protein 1                      |
| 1,283425898 | 0,02108 | 1,273677475 | 0,00011 | IQGAP3   | IQ motif containing GTPase activating protein 3                      |
| 1,321338406 | 0,00806 | 1,387030969 | 0,00002 | IQSEC1   | IQ motif and Sec7 domain 1                                           |
| 2,131693472 | 0,01788 | 1,420107359 | 0,01884 | IRAK3    | interleukin-1 receptor-associated kinase 3                           |
| 1,4063932   | 0,01042 | 1,404444876 | 0,00009 | IRAK3    | interleukin-1 receptor-associated kinase 3                           |
| 1,664397469 | 0,00681 | 1,270150983 | 0,00253 | IRF1     | interferon regulatory factor 1                                       |
| 1,481439798 | 0,02209 | 1,148698355 | 0,01957 | IRF2     | interferon regulatory factor 2                                       |
| 3,826432632 | 0,00005 | 3,03774338  | 0,00001 | IRF4     | interferon regulatory factor 4                                       |
| 1,464085696 | 0,00739 | 1,314031627 | 0,00103 | IRF4     | interferon regulatory factor 4                                       |
| 1,893427262 | 0,00064 | 1,43296165  | 0,00187 | IRF8     | interferon regulatory factor 8                                       |
| 0,6341957   | 0,00945 | 0,771640088 | 0,00097 | IRX2     | iroquois homeobox 2                                                  |
| 0,627635996 | 0,0015  | 0,807201075 | 0,00174 | IRX3     | iroquois homeobox 3                                                  |
| 0,693515485 | 0,00719 | 0,828170661 | 0,01794 | IRX5     | iroquois homeobox 5                                                  |
| 0,69640574  | 0,01419 | 0,796088099 | 0,0019  | ISCA1    | iron-sulfur cluster assembly 1 homolog (S. cerevisiae)               |
| 1,844206236 | 0,0085  | 1,686462221 | 0,00065 | ISG20    | interferon stimulated exonuclease gene 20kDa                         |
| 1,811267966 | 0,0034  | 1,646040691 | 0,0004  | ISG20    | interferon stimulated exonuclease gene 20kDa                         |
| 0,728499557 | 0,02679 | 0,632878297 | 0,00477 | ISM1     | isthmin 1 homolog (zebrafish)                                        |
| 1,224336392 | 0,02754 | 1,236275261 | 0,00765 | ITGA10   | integrin, alpha 10                                                   |
| 1,580082624 | 0,00095 | 1,365093718 | 0,02064 | ITGA4    | integrin, alpha 4 (antigen CD49D, alpha 4 subunit of VLA-4 receptor) |

|             |         |             |         |          |                                                                                                       |
|-------------|---------|-------------|---------|----------|-------------------------------------------------------------------------------------------------------|
| 1,401527449 | 0,03441 | 1,390881972 | 0,00352 | ITGA5    | integrin, alpha 5 (fibronectin receptor, alpha polypeptide)                                           |
| 1,419123356 | 0,02112 | 1,510472586 | 0,00032 | ITGA7    | integrin, alpha 7                                                                                     |
| 1,570256237 | 0,00406 | 1,453972517 | 0,00087 | ITGA8    | integrin, alpha 8                                                                                     |
| 1,707635429 | 0,00028 | 1,677136369 | 0,00006 | ITGA8    | integrin, alpha 8                                                                                     |
| 1,271913007 | 0,01805 | 1,237132479 | 0,00035 | ITGA9    | integrin, alpha 9                                                                                     |
| 2,639015822 | 0,00001 | 2,243886961 | 0,00002 | ITGAL    | integrin, alpha L (antigen CD11A (p180), lymphocyte function-associated antigen 1; alpha polypeptide) |
| 1,45296505  | 0,01531 | 1,395710764 | 0,00007 | ITGAL    | integrin, alpha L (antigen CD11A (p180), lymphocyte function-associated antigen 1; alpha polypeptide) |
| 2,0139111   | 0,00054 | 1,556170353 | 0,00218 | ITGAM    | integrin, alpha M (complement component 3 receptor 3 subunit)                                         |
| 1,423063461 | 0,00193 | 1,433955248 | 0,00054 | ITGAX    | integrin, alpha X (complement component 3 receptor 4 subunit)                                         |
| 1,6724928   | 0,03921 | 1,788809804 | 0,00006 | ITGB2    | integrin, beta 2 (complement component 3 receptor 3 and 4 subunit)                                    |
| 1,597703833 | 0,04799 | 1,714752073 | 0,00006 | ITGB2    | integrin, beta 2 (complement component 3 receptor 3 and 4 subunit)                                    |
| 1,247465572 | 0,04087 | 1,17772279  | 0,00496 | ITGB3    | integrin, beta 3 (platelet glycoprotein IIIa, antigen CD61)                                           |
| 0,843815796 | 0,03818 | 0,877213549 | 0,02444 | ITGB5    | integrin, beta 5                                                                                      |
| 1,378405153 | 0,01916 | 1,315854525 | 0,00357 | ITGB7    | integrin, beta 7                                                                                      |
| 0,759962428 | 0,01571 | 0,827596816 | 0,01844 | ITGB8    | integrin, beta 8                                                                                      |
| 2,267338826 | 0,00162 | 1,975201723 | 0,00003 | ITM2C    | integral membrane protein 2C                                                                          |
| 1,388955136 | 0,0013  | 1,113421618 | 0,04505 | ITPKB    | inositol-trisphosphate 3-kinase B                                                                     |
| 0,571965487 | 0,00268 | 0,734584317 | 0,00004 | ITPR2    | inositol 1,4,5-trisphosphate receptor, type 2                                                         |
| 1,229438867 | 0,03991 | 1,190856849 | 0,01682 | IVD      | isovaleryl-CoA dehydrogenase                                                                          |
| 0,569197015 | 0,00278 | 0,71449707  | 0,00009 | IVL      | involucrin                                                                                            |
| 0,542990928 | 0,01447 | 0,755759964 | 0,00036 | IVNS1ABP | influenza virus NS1A binding protein                                                                  |
| 0,550570799 | 0,00737 | 0,765248385 | 0,00454 | IVNS1ABP | influenza virus NS1A binding protein                                                                  |
| 0,414085331 | 0,00191 | 0,743291492 | 0,00338 | IVNS1ABP | influenza virus NS1A binding protein                                                                  |
| 1,942614991 | 0,0116  | 2,099433367 | 0,00002 | JAK3     | Janus kinase 3                                                                                        |
| 1,675974269 | 0,00652 | 1,483494934 | 0,0001  | JAM2     | junctional adhesion molecule 2                                                                        |
| 0,755236293 | 0,02299 | 0,856781955 | 0,03056 | JARID2   | jumonji, AT rich interactive domain 2                                                                 |
| 0,675487042 | 0,03246 | 0,837406488 | 0,00488 | JARID2   | jumonji, AT rich interactive domain 2                                                                 |
| 0,710053679 | 0,00609 | 0,727490342 | 0,00143 | JUB      | jub, ajuba homolog (Xenopus laevis)                                                                   |
| 0,780786493 | 0,04884 | 0,828744904 | 0,01152 | JUB      | jub, ajuba homolog (Xenopus laevis)                                                                   |
| 1,300440147 | 0,01419 | 1,208317843 | 0,01428 | JUB      | jub, ajuba homolog (Xenopus laevis)                                                                   |
| 0,443805669 | 0,01942 | 0,779704843 | 0,01689 | JUP      | junction plakoglobin                                                                                  |
| 0,704172113 | 0,02733 | 0,748980467 | 0,00158 | KALRN    | kalirin, RhoGEF kinase                                                                                |
| 0,604997045 | 0,01361 | 0,679243142 | 0,00005 | KANK1    | KN motif and ankyrin repeat domains 1                                                                 |
| 0,559418551 | 0,00381 | 0,77916458  | 0,01657 | KAT2B    | K(lysine) acetyltransferase 2B                                                                        |
| 0,669427628 | 0,00915 | 0,755759964 | 0,001   | KATNA1   | katanin p60 (ATPase containing) subunit A 1                                                           |
| 0,771640088 | 0,0087  | 0,793333843 | 0,00004 | KCMF1    | potassium channel modulatory factor 1                                                                 |
| 1,561572985 | 0,00346 | 1,275444392 | 0,00735 | KCNA2    | potassium voltage-gated channel, shaker-related subfamily, member 2                                   |
| 1,615521555 | 0,00097 | 1,429984986 | 0,00305 | KCNA3    | potassium voltage-gated channel, shaker-related subfamily, member 3                                   |
| 1,308578071 | 0,03741 | 1,16634937  | 0,01825 | KCNA5    | potassium voltage-gated channel, shaker-related subfamily, member 5                                   |
| 1,300440147 | 0,04933 | 1,256142381 | 0,00367 | KCNAB2   | potassium voltage-gated channel, shaker-related subfamily, beta member 2                              |
| 1,221793102 | 0,02107 | 1,106497353 | 0,03094 | KCNE3    | potassium voltage-gated channel, Isk-related family, member 3                                         |
| 2,388326374 | 0,00022 | 1,268391399 | 0,00849 | KCNE3    | potassium voltage-gated channel, Isk-related family, member 3                                         |
| 1,215879283 | 0,01772 | 1,165541198 | 0,00983 | KCNH2    | potassium voltage-gated channel, subfamily H (eag-related), member 2                                  |
| 1,403471726 | 0,00454 | 1,263127262 | 0,00047 | KCNH2    | potassium voltage-gated channel, subfamily H (eag-related), member 2                                  |
| 1,663244197 | 0,00362 | 1,522033381 | 0,00006 | KCNJ8    | potassium inwardly-rectifying channel, subfamily J, member 8                                          |
| 1,409320755 | 0,02175 | 1,342572503 | 0,00056 | KCNJ8    | potassium inwardly-rectifying channel, subfamily J, member 8                                          |
| 0,484644908 | 0,00003 | 0,61429349  | 0,00019 | KCNK1    | potassium channel, subfamily K, member 1                                                              |
| 0,571569168 | 0,00045 | 0,632001549 | 0       | KCNK1    | potassium channel, subfamily K, member 1                                                              |
| 0,680185426 | 0,00215 | 0,863938187 | 0,03872 | KCNK10   | potassium channel, subfamily K, member 10                                                             |
| 0,634635443 | 0,00143 | 0,846158597 | 0,04814 | KCNK7    | potassium channel, subfamily K, member 7                                                              |
| 0,528875482 | 0,0002  | 0,692074858 | 0,00107 | KCNK7    | potassium channel, subfamily K, member 7                                                              |
| 0,557869661 | 0,00018 | 0,763129604 | 0,0022  | KCNK7    | potassium channel, subfamily K, member 7                                                              |
| 1,384149716 | 0,02601 | 1,599920257 | 0,00001 | KCNMB1   | potassium large conductance calcium-activated channel, subfamily M, beta member 1                     |
| 1,377450046 | 0,00338 | 1,168777249 | 0,00285 | KCNMB3   | potassium large conductance calcium-activated channel, subfamily M beta member 3                      |
| 1,960198831 | 0,00214 | 1,795020101 | 0,00001 | KCNN3    | potassium intermediate/small conductance calcium-activated channel, subfamily N, member 3             |
| 2,510543983 | 0,00087 | 2,181015465 | 0,00001 | KCNN3    | potassium intermediate/small conductance calcium-activated channel, subfamily N, member 3             |
| 1,274560627 | 0,00749 | 1,190031696 | 0,02826 | KCNQ1    | potassium voltage-gated channel, KQT-like subfamily, member 1                                         |
| 0,828170661 | 0,04143 | 0,809442217 | 0,00022 | KCNRG    | potassium channel regulator                                                                           |
| 0,657015814 | 0,00311 | 0,777007269 | 0,00159 | KCTD1    | potassium channel tetramerisation domain containing 1                                                 |
| 0,57236208  | 0,03245 | 0,754712984 | 0,00171 | KCTD1    | potassium channel tetramerisation domain containing 1                                                 |
| 0,821310701 | 0,01683 | 0,852044095 | 0,04121 | KCTD10   | potassium channel tetramerisation domain containing 10                                                |
| 0,677362489 | 0,01947 | 0,67877249  | 0,0005  | KCTD11   | potassium channel tetramerisation domain containing 11                                                |
| 1,489677463 | 0,02654 | 1,322254605 | 0,00728 | KCTD12   | potassium channel tetramerisation domain containing 12                                                |
| 0,661127303 | 0,00093 | 0,823020345 | 0,02963 | KCTD15   | potassium channel tetramerisation domain containing 15                                                |
| 0,505225723 | 0,00041 | 0,645281245 | 0,00007 | KCTD15   | potassium channel tetramerisation domain containing 15                                                |
| 0,446892581 | 0,00002 | 0,535144349 | 0,00002 | KCTD15   | potassium channel tetramerisation domain containing 15                                                |
| 1,361314116 | 0,00347 | 1,181811547 | 0,00308 | KCTD7    | potassium channel tetramerisation domain containing 7                                                 |
| 0,575544746 | 0,01699 | 0,620283649 | 0,00014 | KCTD9    | potassium channel tetramerisation domain containing 9                                                 |
| 1,578987773 | 0,00234 | 1,208317843 | 0,01615 | KDEL2    | KDEL (Lys-Asp-Glu-Leu) endoplasmic reticulum protein retention receptor 2                             |
| 1,540074348 | 0,03873 | 1,448942155 | 0,00779 | KDEL3    | KDEL (Lys-Asp-Glu-Leu) endoplasmic reticulum protein retention receptor 3                             |
| 0,592135806 | 0,01971 | 0,649769531 | 0,00056 | KDM3A    | lysine (K)-specific demethylase 3A                                                                    |
| 1,281647924 | 0,0164  | 1,214194884 | 0,00117 | KDM4C    | lysine (K)-specific demethylase 4C                                                                    |
| 0,639492791 | 0,00545 | 0,855595026 | 0,01829 | KDM5B    | lysine (K)-specific demethylase 5B                                                                    |
| 1,901318202 | 0,00004 | 1,494849249 | 0,00003 | KDR      | kinase insert domain receptor (a type III receptor tyrosine kinase)                                   |
| 0,622005827 | 0,047   | 0,669427628 | 0,00262 | KDSR     | 3-ketodihydroshingosine reductase                                                                     |
| 1,300440147 | 0,02395 | 1,204137381 | 0,00731 | KHDC1    | KH homology domain containing 1                                                                       |
| 0,661127303 | 0,00931 | 0,835666959 | 0,0058  | KIAA0020 | KIAA0020                                                                                              |
| 1,585568273 | 0,00521 | 1,474269217 | 0,0003  | KIAA0040 | KIAA0040                                                                                              |
| 1,439931319 | 0,00227 | 1,396678532 | 0,00097 | KIAA0040 | KIAA0040                                                                                              |
| 4,307945505 | 0,00001 | 4,016670173 | 0,00004 | KIAA0125 | KIAA0125                                                                                              |
| 0,66296288  | 0,04364 | 0,76684133  | 0,00118 | KIAA0232 | KIAA0232                                                                                              |
| 0,712518807 | 0,01511 | 0,773782497 | 0,00067 | KIAA0284 | KIAA0284                                                                                              |
| 0,830470024 | 0,01675 | 0,848507902 | 0,02176 | KIAA0317 | KIAA0317                                                                                              |
| 0,475659138 | 0,01773 | 0,751059963 | 0,00016 | KIAA0368 | KIAA0368                                                                                              |
| 0,595428425 | 0,0096  | 0,713507253 | 0       | KIAA0368 | KIAA0368                                                                                              |
| 0,775930854 | 0,03019 | 0,857376037 | 0,04397 | KIAA0664 | KIAA0664                                                                                              |
| 0,664803554 | 0,01467 | 0,772175133 | 0,00002 | KIAA0922 | KIAA0922                                                                                              |
| 0,744322628 | 0,00102 | 0,877821798 | 0,03121 | KIAA1217 | KIAA1217                                                                                              |
| 1,322254605 | 0,0139  | 1,138394029 | 0,02029 | KIAA1328 | KIAA1328                                                                                              |
| 1,390881972 | 0,00739 | 1,332374825 | 0,00216 | KIAA1462 | KIAA1462                                                                                              |
| 0,577142709 | 0,00353 | 0,712518807 | 0,00003 | KIAA1468 | KIAA1468                                                                                              |
| 0,639049682 | 0,01479 | 0,697855382 | 0,00617 | KIAA1468 | KIAA1468                                                                                              |
| 0,474671106 | 0,02459 | 0,574349177 | 0       | KIAA1598 | KIAA1598                                                                                              |
| 0,671286251 | 0,0399  | 0,716977624 | 0,0003  | KIAA1671 | KIAA1671                                                                                              |
| 0,577142709 | 0,00511 | 0,709561678 | 0       | KIAA1671 | KIAA1671                                                                                              |
| 0,644834125 | 0,00387 | 0,852634892 | 0,04508 | KIAA1715 | KIAA1715                                                                                              |
| 0,667574152 | 0,00946 | 0,819604608 | 0,01521 | KIAA1731 | KIAA1731                                                                                              |
| 0,579146403 | 0,03758 | 0,61813763  | 0,00002 | KIAA1737 | KIAA1737                                                                                              |

|             |         |             |         |          |                                                                                  |
|-------------|---------|-------------|---------|----------|----------------------------------------------------------------------------------|
| 0,521955964 | 0,00101 | 0,654742712 | 0       | KIF13A   | kinesin family member 13A                                                        |
| 0,824733549 | 0,04245 | 1,132883885 | 0,01957 | KIF19    | kinesin family member 19                                                         |
| 0,715984371 | 0,00464 | 0,681129017 | 0,00001 | KIF1C    | kinesin family member 1C                                                         |
| 0,549427109 | 0,01017 | 0,393108646 | 0       | KIF21A   | kinesin family member 21A                                                        |
| 1,488645255 | 0,00416 | 1,371733289 | 0,00029 | KIF21B   | kinesin family member 21B                                                        |
| 1,450952208 | 0,04977 | 1,256142381 | 0,04099 | KIF26A   | kinesin family member 26A                                                        |
| 0,656560563 | 0,01587 | 0,66158572  | 0,00003 | KIF3A    | kinesin family member 3A                                                         |
| 1,266634254 | 0,02056 | 1,242288282 | 0,00095 | KIR2DLSA | killer cell immunoglobulin-like receptor, two domains, long cytoplasmic tail, 5A |
| 2,554427518 | 0,00024 | 1,439931319 | 0,00007 | KISS1R   | KISS1 receptor                                                                   |
| 0,616853585 | 0,00332 | 0,801625329 | 0,03178 | KLC3     | kinesin light chain 3                                                            |
| 0,481630947 | 0,0046  | 0,706127202 | 0,00091 | KLC3     | kinesin light chain 3                                                            |
| 1,271031689 | 0,03031 | 1,238848698 | 0,00432 | KLC4     | kinesin light chain 4                                                            |
| 1,311302014 | 0,01924 | 1,176906737 | 0,0483  | KLF12    | Kruppel-like factor 12                                                           |
| 1,646040691 | 0,01784 | 1,341642225 | 0,00726 | KLF12    | Kruppel-like factor 12                                                           |
| 1,301341855 | 0,03919 | 1,202469249 | 0,04248 | KLF12    | Kruppel-like factor 12                                                           |
| 1,468150636 | 0,01712 | 1,378405153 | 0,0051  | KLF14    | Kruppel-like factor 14                                                           |
| 2           | 0,00019 | 1,411275843 | 0,00292 | KLF2     | Kruppel-like factor 2 (lung)                                                     |
| 1,333298677 | 0,00196 | 1,145517898 | 0,00924 | KLF2     | Kruppel-like factor 2 (lung)                                                     |
| 0,570381858 | 0,02993 | 0,629378587 | 0,00019 | KLF3     | Kruppel-like factor 3 (basic)                                                    |
| 0,434070114 | 0,04404 | 0,574349177 | 0,00261 | KLF4     | Kruppel-like factor 4 (gut)                                                      |
| 0,520150133 | 0,00612 | 0,579547976 | 0,00003 | KLF4     | Kruppel-like factor 4 (gut)                                                      |
| 0,636397468 | 0,01391 | 0,690637224 | 0,01141 | KLF6     | Kruppel-like factor 6                                                            |
| 0,609205132 | 0,00804 | 0,660669203 | 0,00036 | KLF8     | Kruppel-like factor 8                                                            |
| 1,469168633 | 0,00846 | 1,673652485 | 0,00001 | KLHDC7B  | kelch domain containing 7B                                                       |
| 1,216722359 | 0,03726 | 1,31494276  | 0,00203 | KLHDC9   | kelch domain containing 9                                                        |
| 0,581157054 | 0,00016 | 0,780786493 | 0,0006  | KLHL18   | kelch-like 18 (Drosophila)                                                       |
| 0,681129017 | 0,03479 | 0,833931044 | 0,00786 | KLHL20   | kelch-like 20 (Drosophila)                                                       |
| 0,640379931 | 0,00234 | 0,690637224 | 0,00001 | KLHL21   | kelch-like 21 (Drosophila)                                                       |
| 1,465100875 | 0,00897 | 1,367935304 | 0,0043  | KLHL22   | kelch-like 22 (Drosophila)                                                       |
| 1,303147149 | 0,04593 | 1,260503392 | 0,00016 | KLHL3    | kelch-like 3 (Drosophila)                                                        |
| 1,587767862 | 0,00132 | 1,28877463  | 0,01532 | KLHL5    | kelch-like 5 (Drosophila)                                                        |
| 1,400556321 | 0,00745 | 1,172022284 | 0,01179 | KLHL5    | kelch-like 5 (Drosophila)                                                        |
| 2,100889088 | 0,00075 | 1,408344227 | 0,00185 | KLHL6    | kelch-like 6 (Drosophila)                                                        |
| 1,612165663 | 0,00468 | 1,398616083 | 0,00007 | KLHL6    | kelch-like 6 (Drosophila)                                                        |
| 4,481556857 | 0,00003 | 2,856007959 | 0,00021 | KLHL6    | kelch-like 6 (Drosophila)                                                        |
| 0,432868283 | 0,00104 | 0,745872013 | 0,01459 | KLK10    | kallikrein-related peptidase 10                                                  |
| 0,348927691 | 0,00006 | 0,580351957 | 0,00021 | KLK10    | kallikrein-related peptidase 10                                                  |
| 0,520510799 | 0,00195 | 0,790589117 | 0,01042 | KLK11    | kallikrein-related peptidase 11                                                  |
| 1,262252032 | 0,04956 | 1,366040257 | 0,00073 | KLK4     | kallikrein-related peptidase 4                                                   |
| 0,459456442 | 0,00151 | 0,645281245 | 0,00463 | KLK7     | kallikrein-related peptidase 7                                                   |
| 1,906597091 | 0,00005 | 1,545421099 | 0,00107 | KLRB1    | killer cell lectin-like receptor subfamily B, member 1                           |
| 1,365093718 | 0,00642 | 1,128182137 | 0,01393 | KLRD1    | killer cell lectin-like receptor subfamily D, member 1                           |
| 1,372684431 | 0,00615 | 1,174461971 | 0,01894 | KLRD1    | killer cell lectin-like receptor subfamily D, member 1                           |
| 1,309485423 | 0,0175  | 1,240567298 | 0,00058 | KLRF1    | killer cell lectin-like receptor subfamily F, member 1                           |
| 1,330529041 | 0,01956 | 1,28788163  | 0,0014  | KLRG1    | killer cell lectin-like receptor subfamily G, member 1                           |
| 1,592176198 | 0,00228 | 1,345367209 | 0,00757 | KLRK1    | killer cell lectin-like receptor subfamily K, member 1                           |
| 1,937236378 | 0,00006 | 1,360370852 | 0,0006  | KMO      | kynurenine 3-monooxygenase (kynurenine 3-hydroxylase)                            |
| 1,598811661 | 0,00029 | 1,401527449 | 0,00318 | KMO      | kynurenine 3-monooxygenase (kynurenine 3-hydroxylase)                            |
| 0,642603169 | 0,01927 | 0,819604608 | 0,00351 | KPNA2    | karyopherin alpha 2 (RAG cohort 1, importin alpha 1)                             |
| 0,665725807 | 0,04725 | 0,702222438 | 0,00003 | KPNA4    | karyopherin alpha 4 (importin alpha 3)                                           |
| 0,548285794 | 0,00065 | 0,745872013 | 0,00014 | KPNB1    | karyopherin (importin) beta 1                                                    |
| 0,492433221 | 0,0098  | 0,566441943 | 0,0004  | KREMEN1  | kringle containing transmembrane protein 1                                       |
| 0,734584317 | 0,03932 | 0,703684188 | 0,00001 | KRR1     | KRR1, small subunit (SSU) processome component, homolog (yeast)                  |
| 0,358240413 | 0,00037 | 0,597495602 | 0,00524 | KRT10    | keratin 10                                                                       |
| 0,443805669 | 0,0016  | 0,642157904 | 0,00725 | KRT10    | keratin 10                                                                       |
| 0,393653988 | 0,0005  | 0,640379931 | 0,01206 | KRT10    | keratin 10                                                                       |
| 0,454704126 | 0,01803 | 0,751059963 | 0,00791 | KRT15    | keratin 15                                                                       |
| 0,314253344 | 0,03417 | 0,760489377 | 0,0139  | KRT16    | keratin 16                                                                       |
| 0,3747499   | 0,0016  | 0,582366793 | 0,03172 | KRT3     | keratin 3                                                                        |
| 0,643494624 | 0,00187 | 0,692074858 | 0,00067 | KRT31    | keratin 31                                                                       |
| 0,325110037 | 0,01072 | 0,609627547 | 0,0092  | KRT76    | keratin 76                                                                       |
| 1,271913007 | 0,04744 | 1,268391399 | 0,00429 | KRT79    | keratin 79                                                                       |
| 0,416387885 | 0,00139 | 0,580754366 | 0,00015 | KRT80    | keratin 80                                                                       |
| 1,190856849 | 0,03563 | 1,156688184 | 0,039   | KRT85    | keratin 85                                                                       |
| 0,555169417 | 0,00384 | 0,694477568 | 0,00334 | KRTDAP   | keratinocyte differentiation-associated protein                                  |
| 0,656105627 | 0,02002 | 0,778085177 | 0,0002  | KTN1     | kinectin 1 (kinesin receptor)                                                    |
| 0,628942486 | 0,01563 | 0,723467443 | 0,00001 | KTN1     | kinectin 1 (kinesin receptor)                                                    |
| 1,537940831 | 0,02223 | 1,31494276  | 0,00841 | KYNU     | kynureninase                                                                     |
| 1,901318202 | 0,00358 | 1,385109468 | 0,02515 | KYNU     | kynureninase                                                                     |
| 1,730273381 | 0,02698 | 1,43296165  | 0,00755 | KYNU     | kynureninase                                                                     |
| 1,304954948 | 0,01649 | 1,235418637 | 0,00468 | L3MBTL2  | l(3)mbt-like 2 (Drosophila)                                                      |
| 0,740719899 | 0,00576 | 0,688247801 | 0,00002 | L3MBTL4  | l(3)mbt-like 4 (Drosophila)                                                      |
| 0,809442217 | 0,03651 | 0,870550563 | 0,0166  | LACTB    | lactamase, beta                                                                  |
| 1,225185332 | 0,04176 | 1,190031696 | 0,00953 | LAG3     | lymphocyte-activation gene 3                                                     |
| 1,568080908 | 0,00811 | 1,376495602 | 0,00004 | LAIR1    | leukocyte-associated immunoglobulin-like receptor 1                              |
| 1,487613762 | 0,00928 | 1,22010051  | 0,01479 | LAIR2    | leukocyte-associated immunoglobulin-like receptor 2                              |
| 1,315854525 | 0,00501 | 1,207480591 | 0,00155 | LAMA1    | laminin, alpha 1                                                                 |
| 0,808320869 | 0,02254 | 0,793883931 | 0,00129 | LAMP1    | lysosomal-associated membrane protein 1                                          |
| 0,576343173 | 0,02447 | 0,651573575 | 0,00006 | LANCL1   | LanC lantibiotic synthetase component C-like 1 (bacterial)                       |
| 0,736113431 | 0,01269 | 0,79774524  | 0,00037 | LANCL2   | LanC lantibiotic synthetase component C-like 2 (bacterial)                       |
| 0,787307977 | 0,02536 | 0,786217292 | 0,00049 | LANCL2   | LanC lantibiotic synthetase component C-like 2 (bacterial)                       |
| 1,496922987 | 0,0362  | 1,570256237 | 0,00141 | LAPTMS   | lysosomal protein transmembrane 5                                                |
| 0,622868708 | 0,02397 | 0,811127156 | 0,0002  | LARP4B   | La ribonucleoprotein domain family, member 4B                                    |
| 1,602139755 | 0,00276 | 1,151887642 | 0,0383  | LARP6    | La ribonucleoprotein domain family, member 6                                     |
| 0,615999037 | 0,01213 | 0,691595315 | 0,00003 | LARP7    | La ribonucleoprotein domain family, member 7                                     |
| 0,618566239 | 0,00818 | 0,773782497 | 0,00018 | LARS     | leucyl-tRNA synthetase                                                           |
| 0,578745108 | 0,01862 | 0,74277646  | 0,0002  | LARS     | leucyl-tRNA synthetase                                                           |
| 0,658839976 | 0,00385 | 0,79774524  | 0,04603 | LARS     | leucyl-tRNA synthetase                                                           |
| 2,00416321  | 0,00008 | 1,682958965 | 0       | LAT2     | linker for activation of T cells family, member 2                                |
| 2,450370664 | 0,00013 | 2,581124981 | 0,00013 | LAX1     | lymphocyte transmembrane adaptor 1                                               |
| 1,559409685 | 0,02435 | 1,339783602 | 0,00028 | LAYN     | layilin                                                                          |
| 1,634670657 | 0,00114 | 1,533682866 | 0,00026 | LBH      | limb bud and heart development homolog (mouse)                                   |
| 1,559409685 | 0,00221 | 1,605474777 | 0,00003 | LBP      | lipopolysaccharide binding protein                                               |
| 2,211461307 | 0,00234 | 1,918528239 | 0,0002  | LBP      | lipopolysaccharide binding protein                                               |
| 0,398596238 | 0,00028 | 0,635075491 | 0,03845 | LCE3D    | late cornified envelope 3D                                                       |
| 1,602139755 | 0,01077 | 1,556170353 | 0,00024 | LCK      | lymphocyte-specific protein tyrosine kinase                                      |
| 2,283109414 | 0,00009 | 1,823866331 | 0,00039 | LCK      | lymphocyte-specific protein tyrosine kinase                                      |
| 0,685391402 | 0,00227 | 0,844400887 | 0,01019 | LCMT1    | leucine carboxyl methyltransferase 1                                             |

|             |         |             |         |             |                                                                                          |
|-------------|---------|-------------|---------|-------------|------------------------------------------------------------------------------------------|
| 0,698339266 | 0,0048  | 0,690158677 | 0,00001 | LCMT2       | leucine carboxyl methyltransferase 2                                                     |
| 1,350974085 | 0,01433 | 1,439931319 | 0,00025 | LCNL1       | lipocalin-like 1                                                                         |
| 1,802500925 | 0,00353 | 1,43097652  | 0,01864 | LCP2        | lymphocyte cytosolic protein 2 (SH2 domain containing leukocyte protein of 76kDa)        |
| 1,571345033 | 0,01403 | 1,493813457 | 0,00073 | LCP2        | lymphocyte cytosolic protein 2 (SH2 domain containing leukocyte protein of 76kDa)        |
| 1,249196126 | 0,01735 | 1,136029265 | 0,00091 | LCP2        | lymphocyte cytosolic protein 2 (SH2 domain containing leukocyte protein of 76kDa)        |
| 1,414213562 | 0,00961 | 1,226884977 | 0,00526 | LCP2        | lymphocyte cytosolic protein 2 (SH2 domain containing leukocyte protein of 76kDa)        |
| 0,727490342 | 0,00843 | 0,857376037 | 0,00834 | LDHA        | lactate dehydrogenase A                                                                  |
| 1,604632333 | 0,04414 | 1,268391399 | 0,02897 | LEF1        | lymphoid enhancer-binding factor 1                                                       |
| 0,500693628 | 0,0055  | 0,736623843 | 0,00019 | LEO1        | Leo1, Paf1/RNA polymerase II complex component, homolog (S. cerevisiae)                  |
| 1,336074078 | 0,01013 | 1,167158102 | 0,04684 | LEPR        | leptin receptor                                                                          |
| 1,42800398  | 0,02645 | 1,371733289 | 0,00017 | LEPRE1      | leucine proline-enriched proteoglycan (leprecan) 1                                       |
| 0,687294348 | 0,01071 | 0,749499801 | 0,00194 | LEPRE1      | leprecan-like 1                                                                          |
| 0,626332219 | 0,00035 | 0,796640096 | 0,00026 | LGALS3      | lectin, galactoside-binding, soluble, 3                                                  |
| 0,668963777 | 0,01086 | 0,760489377 | 0,0127  | LGALS8      | lectin, galactoside-binding, soluble, 8                                                  |
| 0,465224829 | 0,00441 | 0,701249625 | 0,00028 | LGALS8      | lectin, galactoside-binding, soluble, 8                                                  |
| 0,411510173 | 0,00027 | 0,548665969 | 0,00042 | LGALS8      | lectin, galactoside-binding-like                                                         |
| 0,298127218 | 0,00025 | 0,481630947 | 0       | LGALS8      | lectin, galactoside-binding-like                                                         |
| 1,22858698  | 0,02642 | 1,128964405 | 0,03417 | LGI2        | leucine-rich repeat LGI family, member 2                                                 |
| 0,524131238 | 0,03997 | 0,70027816  | 0,00857 | LGR4        | leucine-rich repeat containing G protein-coupled receptor 4                              |
| 1,624504793 | 0,00098 | 1,526259209 | 0,00018 | LHX6        | LIM homeobox 6                                                                           |
| 0,632001549 | 0,03484 | 0,810003474 | 0,03448 | LIAS        | lipic acid synthetase                                                                    |
| 1,254402205 | 0,04976 | 1,254402205 | 0,00084 | LIF         | leukemia inhibitory factor (cholinergic differentiation factor)                          |
| 1,561572985 | 0,0081  | 1,148698355 | 0,0398  | LILRA2      | leukocyte immunoglobulin-like receptor, subfamily A (with TM domain), member 2           |
| 1,4054187   | 0,00489 | 1,475291457 | 0,00003 | LILRB1      | leukocyte immunoglobulin-like receptor, subfamily B (with TM and ITIM domains), member 1 |
| 1,988940337 | 0,00154 | 1,642621402 | 0,00172 | LILRB1      | leukocyte immunoglobulin-like receptor, subfamily B (with TM and ITIM domains), member 1 |
| 1,566994374 | 0,00276 | 1,373636233 | 0,00044 | LILRB2      | leukocyte immunoglobulin-like receptor, subfamily B (with TM and ITIM domains), member 2 |
| 1,448942155 | 0,0162  | 1,255271991 | 0,00077 | LILRB2      | leukocyte immunoglobulin-like receptor, subfamily B (with TM and ITIM domains), member 2 |
| 1,282536603 | 0,03619 | 1,191682575 | 0,01041 | LILRB5      | leukocyte immunoglobulin-like receptor, subfamily B (with TM and ITIM domains), member 5 |
| 0,660669203 | 0,01184 | 0,756283999 | 0,00024 | LIMK2       | LIM domain kinase 2                                                                      |
| 0,701249625 | 0,02437 | 0,853817714 | 0,03645 | LIN37       | lin-37 homolog (C. elegans)                                                              |
| 0,664342907 | 0,01497 | 0,807760778 | 0,00672 | LIN7B       | lin-7 homolog B (C. elegans)                                                             |
| 0,627635996 | 0,01104 | 0,747942879 | 0,00063 | LIN7C       | lin-7 homolog C (C. elegans)                                                             |
| 1,235418637 | 0,03598 | 1,128182137 | 0,04563 | LINC00152   | long intergenic non-protein coding RNA 152                                               |
| 1,252664439 | 0,04721 | 1,132098902 | 0,02252 | LINC00226   | long intergenic non-protein coding RNA 226                                               |
| 0,8362464   | 0,0142  | 0,911301281 | 0,03997 | LINC00302   | long intergenic non-protein coding RNA 302                                               |
| 1,487613762 | 0,00654 | 1,314031627 | 0,00438 | LINC00312   | long intergenic non-protein coding RNA 312                                               |
| 1,21167266  | 0,02406 | 1,226884977 | 0,00071 | LINC00340   | long intergenic non-protein coding RNA 340                                               |
| 0,804408371 | 0,02814 | 0,849684999 | 0,02518 | LINC00478   | long intergenic non-protein coding RNA 478                                               |
| 0,754190038 | 0,00445 | 0,782954296 | 0,00147 | LINC00478   | long intergenic non-protein coding RNA 478                                               |
| 1,478362431 | 0,00305 | 1,329607108 | 0,0006  | LIPE        | lipase, hormone-sensitive                                                                |
| 1,398616083 | 0,02397 | 1,345367209 | 0,00146 | LIX1L       | Lix1 homolog (mouse)-like                                                                |
| 0,717474767 | 0,01608 | 0,824733549 | 0,01821 | LLGL2       | lethal giant larvae homolog 2 (Drosophila)                                               |
| 1,366040257 | 0,04669 | 1,184271612 | 0,00939 | LMCD1       | LIM and cysteine-rich domains 1                                                          |
| 1,376495602 | 0,01061 | 1,25962998  | 0,00365 | LMF1        | lipase maturation factor 1                                                               |
| 1,597703833 | 0,04067 | 1,41029796  | 0,0027  | LMF1        | lipase maturation factor 1                                                               |
| 1,416175438 | 0,01066 | 1,180992661 | 0,01927 | LMO2        | LIM domain only 2 (rhombotin-like 1)                                                     |
| 0,566834706 | 0,00445 | 0,518709968 | 0       | LMO4        | LIM domain only 4                                                                        |
| 0,604577838 | 0,00762 | 0,684441907 | 0,00404 | LMO4        | LIM domain only 4                                                                        |
| 0,544121221 | 0,01429 | 0,542238704 | 0,00059 | LMO7        | LIM domain 7                                                                             |
| 0,500693628 | 0,02411 | 0,607518396 | 0,00063 | LMO7        | LIM domain 7                                                                             |
| 1,441928871 | 0,0006  | 1,303147149 | 0,00184 | LMOD1       | leiomodin 1 (smooth muscle)                                                              |
| 1,359428242 | 0,00621 | 1,364147835 | 0,00095 | LNP1        | leukemia NUP98 fusion partner 1                                                          |
| 1,246601194 | 0,04246 | 1,25962998  | 0,00498 | LOC10012825 | hypothetical LOC100128252                                                                |
| 1,266634254 | 0,04394 | 1,132098902 | 0,02001 | LOC10012875 | INM04                                                                                    |
| 1,225185332 | 0,00906 | 1,159095952 | 0,00513 | LOC10012894 | hypothetical LOC100128946                                                                |
| 1,304954948 | 0,0185  | 1,361314116 | 0,00418 | LOC10012912 | hypothetical LOC100129129                                                                |
| 1,336074078 | 0,01789 | 1,483494934 | 0       | LOC10012982 | hypothetical LOC100129827                                                                |
| 1,341642225 | 0,02233 | 1,332374825 | 0,0002  | LOC10012984 | hypothetical LOC100129845                                                                |
| 1,32317144  | 0,01292 | 1,156688184 | 0,04049 | LOC10012993 | lectin, galactoside-binding, soluble, 14 pseudogene                                      |
| 0,74277646  | 0,00972 | 0,786217292 | 0,00221 | LOC10013069 | hypothetical LOC100130691                                                                |
| 0,793883931 | 0,00883 | 0,784040454 | 0,00138 | LOC10013074 | hypothetical LOC100130744                                                                |
| 1,265756594 | 0,03698 | 1,303147149 | 0,0001  | LOC10013087 | hypothetical LOC100130872                                                                |
| 2,197708435 | 0,00129 | 1,6724928   | 0,00009 | LOC10013104 | hypothetical LOC100131043                                                                |
| 1,266634254 | 0,01656 | 1,189207115 | 0,00015 | LOC10013109 | hypothetical LOC100131096                                                                |
| 1,391846392 | 0,03378 | 1,248330549 | 0,01681 | LOC10013143 | hypothetical LOC100131434                                                                |
| 1,2397077   | 0,04738 | 1,185092771 | 0,00124 | LOC10013182 | hypothetical LOC100131825                                                                |
| 1,479387509 | 0,00417 | 1,365093718 | 0,00765 | LOC10013274 | hypothetical LOC100132741                                                                |
| 1,715941061 | 0,00006 | 1,352848231 | 0,01504 | LOC10013299 | hypothetical LOC100132999                                                                |
| 0,823591017 | 0,02711 | 0,862741345 | 0,02276 | LOC10028759 | hypothetical protein LOC100287590                                                        |
| 1,245737416 | 0,03034 | 1,204972315 | 0,00676 | LOC10028759 | hypothetical LOC100287598                                                                |
| 1,790050142 | 0,0001  | 1,453972517 | 0,00042 | LOC10028781 | hCG2045266-like                                                                          |
| 0,76154437  | 0,01784 | 0,820172911 | 0,00023 | LOC10028886 | hypothetical LOC100288860                                                                |
| 1,348167732 | 0,00216 | 1,183451022 | 0,0135  | LOC10031075 | hypothetical LOC100310756                                                                |
| 0,689202576 | 0,03086 | 0,819604608 | 0,00891 | LOC10049946 | hypothetical LOC100499466                                                                |
| 1,337927555 | 0,01747 | 1,190031696 | 0,01623 | LOC10050549 | hypothetical LOC100505490                                                                |
| 1,351910833 | 0,00436 | 1,25962998  | 0,00017 | LOC10050550 | hypothetical LOC100505500                                                                |
| 0,379981214 | 0,0003  | 0,604577838 | 0,00001 | LOC10050563 | hypothetical LOC100505633                                                                |
| 1,987562187 | 0,0009  | 1,77399261  | 0,00018 | LOC10050568 | hypothetical LOC100505687                                                                |
| 1,199139914 | 0,02587 | 1,180174343 | 0,03818 | LOC10050571 | hypothetical LOC100505711                                                                |
| 1,397646972 | 0,03763 | 1,376495602 | 0,00451 | LOC10050574 | hypothetical LOC100505746                                                                |
| 1,313121125 | 0,01173 | 1,236275261 | 0,00062 | LOC10050578 | hypothetical LOC100505783                                                                |
| 0,751059963 | 0,04788 | 0,839149637 | 0,04544 | LOC10050585 | hypothetical LOC100505854                                                                |
| 0,585605091 | 0,00082 | 0,732042848 | 0,00085 | LOC10050588 | hypothetical LOC100505880                                                                |
| 1,276328769 | 0,0069  | 1,178539408 | 0,00291 | LOC10050597 | hypothetical LOC100505976                                                                |
| 1,854461093 | 0,02716 | 1,572434584 | 0,00398 | LOC10050609 | hypothetical LOC100506098                                                                |
| 1,246601194 | 0,01217 | 1,131314463 | 0,04396 | LOC10050610 | hypothetical LOC100506100                                                                |
| 1,252664439 | 0,02355 | 1,181811547 | 0,00757 | LOC10050611 | hypothetical LOC100506113                                                                |
| 0,762072415 | 0,01425 | 0,869947353 | 0,03085 | LOC10050620 | hypothetical LOC100506201                                                                |
| 0,747424624 | 0,02224 | 0,733566672 | 0,00005 | LOC10050631 | hypothetical LOC100506314                                                                |
| 1,954771533 | 0,00302 | 1,466116757 | 0,00036 | LOC10050667 | hypothetical LOC100506676                                                                |
| 1,397646972 | 0,01306 | 1,244011653 | 0,00182 | LOC10050673 | hypothetical LOC100506733                                                                |
| 1,688801775 | 0,00012 | 1,276328769 | 0,00947 | LOC10050677 | hypothetical LOC100506776                                                                |
| 1,408344227 | 0,03085 | 1,189207115 | 0,01769 | LOC10050684 | hypothetical LOC100506844                                                                |
| 1,350974085 | 0,02079 | 1,238848698 | 0,00253 | LOC10050694 | hypothetical LOC100506942                                                                |
| 1,227735684 | 0,01746 | 1,225185332 | 0,00214 | LOC10050700 | hypothetical LOC100507006                                                                |
| 1,22858698  | 0,04495 | 1,22010051  | 0,00103 | LOC10050700 | hypothetical LOC100507009                                                                |
| 1,304954948 | 0,02856 | 1,143930973 | 0,03646 | LOC10050723 | hypothetical LOC100507239                                                                |
| 1,458009379 | 0,02412 | 1,159095952 | 0,02661 | LOC10050728 | hypothetical protein LOC100507281                                                        |



|             |         |             |         |             |                                                                 |
|-------------|---------|-------------|---------|-------------|-----------------------------------------------------------------|
| 0,534773544 | 0,00013 | 0,741233505 | 0,00001 | LOC10050730 | hypothetical LOC100507303                                       |
| 1,586667686 | 0,00058 | 1,358486285 | 0,00095 | LOC10050730 | hypothetical LOC100507307                                       |
| 1,474269217 | 0,00203 | 1,353786279 | 0,00004 | LOC10050739 | hypothetical LOC100507392                                       |
| 1,268391399 | 0,03412 | 1,107264584 | 0,04663 | LOC10050740 | hypothetical LOC100507408                                       |
| 1,32408891  | 0,00812 | 1,293248932 | 0,00094 | LOC10050742 | hypothetical LOC100507424                                       |
| 0,745355193 | 0,00855 | 0,834509281 | 0,00825 | LOC10050744 | hypothetical LOC100507448                                       |
| 1,309485423 | 0,04737 | 1,204972315 | 0,01049 | LOC10050749 | hypothetical LOC100507495                                       |
| 1,325007017 | 0,0139  | 1,292352831 | 0,0005  | LOC10050750 | hypothetical LOC100507501                                       |
| 1,270150983 | 0,00598 | 1,188383105 | 0,00087 | LOC10050758 | hypothetical LOC100507584                                       |
| 1,313121125 | 0,02983 | 1,255271991 | 0,00485 | LOC10050763 | hypothetical LOC100507637                                       |
| 2,508804409 | 0,00421 | 2,099433367 | 0,00008 | LOC10050879 | hypothetical protein LOC100508797                               |
| 0,493458273 | 0,00142 | 0,678302164 | 0,0002  | LOC10050963 | hypothetical LOC100509635                                       |
| 1,235418637 | 0,03987 | 1,137605228 | 0,00439 | LOC145820   | hypothetical LOC145820                                          |
| 1,304954948 | 0,01048 | 1,222640278 | 0,0029  | LOC145845   | hypothetical LOC145845                                          |
| 0,61301743  | 0,00903 | 0,800514811 | 0,01613 | LOC147727   | hypothetical LOC147727                                          |
| 1,193335743 | 0,04267 | 1,17609125  | 0,01858 | LOC148189   | hypothetical LOC148189                                          |
| 0,791137301 | 0,02861 | 0,829319546 | 0,00103 | LOC152217   | hypothetical LOC152217                                          |
| 1,399585866 | 0,02067 | 1,366040257 | 0,00197 | LOC153684   | hypothetical LOC153684                                          |
| 0,721464343 | 0,00388 | 0,791685866 | 0,00365 | LOC154761   | hypothetical LOC154761                                          |
| 1,227735684 | 0,04918 | 1,172834949 | 0,01307 | LOC154822   | hypothetical LOC154822                                          |
| 0,629378587 | 0,03362 | 0,774855931 | 0,03806 | LOC158863   | hypothetical protein LOC158863                                  |
| 0,450625231 | 0,00805 | 0,817335328 | 0,00779 | LOC203274   | hypothetical protein LOC203274                                  |
| 1,297738767 | 0,03753 | 1,144724161 | 0,00612 | LOC220980   | hypothetical LOC220980                                          |
| 1,183451022 | 0,02869 | 1,22603486  | 0,0001  | LOC221442   | adenylate cyclase 10 pseudogene                                 |
| 0,801625329 | 0,0199  | 0,866336856 | 0,01004 | LOC283104   | hypothetical LOC283104                                          |
| 0,480630464 | 0,00018 | 0,778624691 | 0,00519 | LOC283404   | hypothetical LOC283404                                          |
| 0,61813763  | 0,0099  | 0,661127303 | 0,00015 | LOC284219   | hypothetical protein LOC284219                                  |
| 0,511214265 | 0,00017 | 0,690637224 | 0,00848 | LOC284837   | hypothetical LOC284837                                          |
| 1,22858698  | 0,02487 | 1,139973273 | 0,01521 | LOC285972   | hypothetical LOC285972                                          |
| 1,497960934 | 0,00387 | 1,241427492 | 0,00153 | LOC338588   | hypothetical LOC338588                                          |
| 1,255271991 | 0,04219 | 1,164733586 | 0,00369 | LOC338963   | epididymal protein pseudogene                                   |
| 0,421907898 | 0,00001 | 0,681129017 | 0,01251 | LOC344887   | NmrA-like family domain containing 1 pseudogene                 |
| 1,613283518 | 0,00464 | 1,271913007 | 0,02834 | LOC374443   | CLR pseudogene                                                  |
| 1,477338064 | 0,00828 | 1,604362333 | 0       | LOC387895   | hypothetical LOC387895                                          |
| 0,804408371 | 0,03766 | 0,890075733 | 0,03281 | LOC388789   | hypothetical LOC388789                                          |
| 0,667574152 | 0,00839 | 0,759962428 | 0,00033 | LOC389831   | hypothetical LOC389831                                          |
| 1,319507911 | 0,00582 | 1,164733586 | 0,01567 | LOC400568   | hypothetical LOC400568                                          |
| 1,274560627 | 0,02854 | 1,248330549 | 0,01119 | LOC400643   | hypothetical LOC400643                                          |
| 1,441928871 | 0,00102 | 1,191682575 | 0,00456 | LOC401022   | hypothetical LOC401022                                          |
| 0,767373048 | 0,01445 | 0,840313752 | 0,00952 | LOC401093   | hypothetical LOC401093                                          |
| 1,366040257 | 0,00351 | 1,128182137 | 0,03872 | LOC440149   | hypothetical LOC440149                                          |
| 1,299539062 | 0,01568 | 1,234562607 | 0,00113 | LOC440792   | proline dehydrogenase (oxidase) 1 pseudogene                    |
| 1,25092908  | 0,01602 | 1,163926534 | 0,02396 | LOC442028   | hypothetical LOC442028                                          |
| 0,756808396 | 0,01584 | 0,885153765 | 0,02248 | LOC642236   | FSHD region gene 1 pseudogene                                   |
| 0,665264521 | 0,04362 | 0,813943185 | 0,03129 | LOC643792   | contactin associated protein-like 3 pseudogene                  |
| 1,295940965 | 0,00155 | 1,114966219 | 0,04985 | LOC643837   | hypothetical LOC643837                                          |
| 0,729004689 | 0,02204 | 0,710053679 | 0,00154 | LOC644656   | hypothetical LOC644656                                          |
| 1,821339667 | 0,00222 | 1,338855257 | 0,00121 | LOC645431   | hypothetical LOC645431                                          |
| 1,352848231 | 0,00649 | 1,265756594 | 0,01429 | LOC645722   | hypothetical LOC645722                                          |
| 1,283425898 | 0,00519 | 1,181811547 | 0,0051  | LOC645722   | hypothetical LOC645722                                          |
| 0,713012859 | 0,01837 | 0,807760778 | 0,00319 | LOC646014   | hypothetical protein LOC646014                                  |
| 1,340712592 | 0,03767 | 1,316766922 | 0,00018 | LOC728099   | hypothetical protein LOC728099                                  |
| 1,181811547 | 0,02596 | 1,150291893 | 0,00887 | LOC728705   | hypothetical protein LOC728705                                  |
| 1,371733289 | 0,00538 | 1,257884972 | 0,01037 | LOC728743   | zinc finger protein pseudogene                                  |
| 1,261377409 | 0,02181 | 1,154285418 | 0,0254  | LOC728855   | hypothetical LOC728855                                          |
| 0,714992493 | 0,02707 | 0,78132788  | 0,00298 | LOC729082   | hypothetical LOC729082                                          |
| 1,237990291 | 0,01629 | 1,119612889 | 0,02584 | LOC730098   | hypothetical LOC730098                                          |
| 1,28877463  | 0,00686 | 1,241427492 | 0,00066 | LOC730961   | hypothetical protein LOC730961                                  |
| 3,251262408 | 0,00989 | 4,675108994 | 0,00002 | LSM9610     | BMS1 homolog, ribosome assembly protein (yeast) pseudogene      |
| 0,511568735 | 0,03116 | 0,589678296 | 0,00001 | LONRF1      | LON peptidase N-terminal domain and ring finger 1               |
| 1,832737289 | 0,00948 | 1,851892045 | 0,00004 | LOXL2       | lysyl oxidase-like 2                                            |
| 0,501040803 | 0,01486 | 0,610896551 | 0,00004 | LPAR3       | lysophosphatidic acid receptor 3                                |
| 0,636838738 | 0,04232 | 0,77271055  | 0,00779 | LPHN2       | latrophilin 2                                                   |
| 1,362258035 | 0,0458  | 1,251796459 | 0,03097 | LPL         | lipoprotein lipase                                              |
| 2,082043195 | 0       | 1,623379162 | 0,00003 | LPXN        | leupaxin                                                        |
| 0,550570799 | 0,00631 | 0,825877665 | 0,00258 | LRBA        | LPS-responsive vesicle trafficking, beach and anchor containing |
| 0,555939579 | 0,02533 | 0,526315577 | 0,00073 | LRIG3       | leucine-rich repeats and immunoglobulin-like domains 3          |
| 1,993080526 | 0,00001 | 1,544350266 | 0,0001  | LRMP        | lymphoid-restricted membrane protein                            |
| 2,306971211 | 0,00002 | 1,741101127 | 0,00003 | LRMP        | lymphoid-restricted membrane protein                            |
| 0,655651007 | 0,04767 | 0,76950361  | 0,00065 | LRP11       | low density lipoprotein receptor-related protein 11             |
| 0,600401714 | 0,00341 | 0,773246337 | 0,0141  | LRP4        | low density lipoprotein receptor-related protein 4              |
| 0,491410299 | 0,00079 | 0,657927263 | 0,00057 | LRPPRC      | leucine-rich PPR-motif containing                               |
| 0,696888619 | 0,02491 | 0,821880187 | 0,00087 | LRPPRC      | leucine-rich PPR-motif containing                               |
| 0,628942486 | 0,0204  | 0,732042848 | 0,00082 | LRRC1       | leucine rich repeat containing 1                                |
| 1,512567997 | 0,0007  | 1,337927555 | 0,00082 | LRRC25      | leucine rich repeat containing 25                               |
| 1,315854525 | 0,04974 | 1,466116757 | 0,00035 | LRRC33      | leucine rich repeat containing 33                               |
| 0,668037039 | 0,01598 | 0,721964598 | 0,00001 | LRRC58      | leucine rich repeat containing 58                               |
| 0,453445164 | 0,04613 | 0,71400199  | 0,00004 | LRRFIP1     | leucine rich repeat (in FLII) interacting protein 1             |
| 0,62546454  | 0,01996 | 0,691116103 | 0,00001 | LRRFIP2     | leucine rich repeat (in FLII) interacting protein 2             |
| 0,675487042 | 0,00313 | 0,784040454 | 0,00032 | LRRFIP2     | leucine rich repeat (in FLII) interacting protein 2             |
| 1,421092043 | 0,02093 | 1,194163187 | 0,00212 | LRRN1       | leucine rich repeat neuronal 1                                  |
| 1,229438867 | 0,03346 | 1,355664327 | 0,00001 | LRRN4       | leucine rich repeat neuronal 4                                  |
| 0,579547976 | 0,00189 | 0,746906729 | 0,00002 | LSG1        | large subunit GTPase 1 homolog (S. cerevisiae)                  |
| 0,622437118 | 0,01572 | 0,803293997 | 0,00216 | LSM14A      | LSM14A, SCD6 homolog A (S. cerevisiae)                          |
| 0,70514898  | 0,00195 | 0,827023368 | 0,00189 | LSM3        | LSM3 homolog, U6 small nuclear RNA associated (S. cerevisiae)   |
| 0,708087719 | 0,00909 | 0,847332435 | 0,01874 | LSS         | lanosterol synthase (2,3-oxidosqualene-lanosterol cyclase)      |
| 1,352848231 | 0,02918 | 1,43296165  | 0,00002 | LST1        | leukocyte specific transcript 1                                 |
| 0,525586455 | 0,00472 | 0,702222438 | 0,00023 | LTB4R       | leukotriene B4 receptor                                         |
| 0,701249625 | 0,01515 | 0,754712984 | 0,00007 | LTV1        | LTV1 homolog (S. cerevisiae)                                    |
| 0,635515845 | 0,00822 | 0,590087172 | 0,00001 | LTV1        | LTV1 homolog (S. cerevisiae)                                    |
| 0,730016005 | 0,03258 | 0,790041312 | 0,00185 | LUC7L3      | LUC7-like 3 (S. cerevisiae)                                     |
| 1,192508872 | 0,03782 | 1,22010051  | 0,00046 | LUZP4       | leucine zipper protein 4                                        |
| 0,496202187 | 0,00952 | 0,724471077 | 0,00256 | LY6D        | lymphocyte antigen 6 complex, locus D                           |
| 1,335148303 | 0,00985 | 1,230291345 | 0,0014  | LY6G5C      | lymphocyte antigen 6 complex, locus G5C                         |
| 0,313600551 | 0,00001 | 0,575943821 | 0,00764 | LY6G6C      | lymphocyte antigen 6 complex, locus G6C                         |
| 1,677136369 | 0,00664 | 1,418140036 | 0,0025  | LY9         | lymphocyte antigen 9                                            |
| 1,915870436 | 0,00007 | 1,780151467 | 0       | LY9         | lymphocyte antigen 9                                            |
| 2,628063254 | 0,00001 | 2,040609318 | 0,00002 | LY9         | lymphocyte antigen 9                                            |

|             |         |             |         |            |                                                                                             |
|-------------|---------|-------------|---------|------------|---------------------------------------------------------------------------------------------|
| 2,799171731 | 0,00001 | 1,522033381 | 0,00257 | LY96       | lymphocyte antigen 96                                                                       |
| 1,351910833 | 0,02587 | 1,297738767 | 0,00148 | LYL1       | lymphoblastic leukemia derived sequence 1                                                   |
| 2,203810232 | 0,00041 | 1,549711862 | 0,00002 | LYN        | v-yes-1 Yamaguchi sarcoma viral related oncogene homolog                                    |
| 2,668446339 | 0,00002 | 1,727876375 | 0,00012 | LYN        | v-yes-1 Yamaguchi sarcoma viral related oncogene homolog                                    |
| 1,329607108 | 0,01477 | 1,122721422 | 0,04088 | LYPD4      | LY6/PLAUR domain containing 4                                                               |
| 0,699308041 | 0,03059 | 0,795536484 | 0,00328 | LYRM2      | LYR motif containing 2                                                                      |
| 0,801625329 | 0,02637 | 0,855002178 | 0,01009 | LYSMD4     | LysM, putative peptidoglycan-binding, domain containing 4                                   |
| 0,802737389 | 0,01623 | 0,847332435 | 0,00322 | LYST       | lysosomal trafficking regulator                                                             |
| 0,596667872 | 0,03346 | 0,710053679 | 0,00112 | LYST       | lysosomal trafficking regulator                                                             |
| 1,378405153 | 0,01943 | 1,420107359 | 0,00014 | LYVE1      | lymphatic vessel endothelial hyaluronan receptor 1                                          |
| 1,611048582 | 0,00242 | 1,572434584 | 0,00015 | LYZ        | lysozyme                                                                                    |
| 0,765248385 | 0,01912 | 0,734075318 | 0,00001 | LZIC       | leucine zipper and CTNBP1 domain containing                                                 |
| 0,70759708  | 0,02432 | 0,778624691 | 0,00429 | MACF1      | microtubule-actin crosslinking factor 1                                                     |
| 0,609205132 | 0,00915 | 0,831045862 | 0,0149  | MACF1      | microtubule-actin crosslinking factor 1                                                     |
| 1,317679952 | 0,02628 | 1,135242102 | 0,04188 | MACROD2-AS | MACROD2 antisense RNA 1 (non-protein coding)                                                |
| 0,378141999 | 0,00951 | 0,525586455 | 0,0044  | MAF        | v-maf musculoaponeurotic fibrosarcoma oncogene homolog (avian)                              |
| 0,480963727 | 0,00002 | 0,549046407 | 0,00015 | MAF        | v-maf musculoaponeurotic fibrosarcoma oncogene homolog (avian)                              |
| 0,510860041 | 0,01309 | 0,671286251 | 0,01174 | MAF        | v-maf musculoaponeurotic fibrosarcoma oncogene homolog (avian)                              |
| 0,556710809 | 0,01093 | 0,647072827 | 0,00048 | MAF        | v-maf musculoaponeurotic fibrosarcoma oncogene homolog (avian)                              |
| 0,40323088  | 0,03417 | 0,524131238 | 0,00279 | MAF        | v-maf musculoaponeurotic fibrosarcoma oncogene homolog (avian)                              |
| 0,679714121 | 0,00516 | 0,707106781 | 0,00003 | MAFB       | v-maf musculoaponeurotic fibrosarcoma oncogene homolog B (avian)                            |
| 1,644900137 | 0,00248 | 1,312211255 | 0,00732 | MAGEH1     | melanoma antigen family H, 1                                                                |
| 0,732042848 | 0,00142 | 0,844986384 | 0,00952 | MAGI1      | membrane associated guanylate kinase, WW and PDZ domain containing 1                        |
| 0,710546022 | 0,01688 | 0,76630998  | 0,00044 | MAGI1      | membrane associated guanylate kinase, WW and PDZ domain containing 1                        |
| 0,639492791 | 0,02455 | 0,76154437  | 0,00133 | MAGI1      | membrane associated guanylate kinase, WW and PDZ domain containing 1                        |
| 0,759435845 | 0,01241 | 0,723969086 | 0,00078 | MAGI1      | membrane associated guanylate kinase, WW and PDZ domain containing 1                        |
| 0,544498508 | 0,03083 | 0,692074858 | 0,00018 | MAL2       | mal, T-cell differentiation protein 2 (gene/pseudogene)                                     |
| 0,502780209 | 0,02114 | 0,586417475 | 0,00004 | MALAT1     | metastasis associated lung adenocarcinoma transcript 1 (non-protein coding)                 |
| 1,632406092 | 0,00677 | 1,320422841 | 0,04003 | MAN1A1     | mannosidase, alpha, class 1A, member 1                                                      |
| 1,53900722  | 0,00015 | 1,276328769 | 0,01445 | MANEAL     | mannosidase, endo-alpha-like                                                                |
| 1,23370717  | 0,02659 | 1,219255094 | 0,00048 | MANF       | mesencephalic astrocyte-derived neurotrophic factor                                         |
| 0,597495602 | 0,00428 | 0,723467443 | 0,0028  | MAP2       | microtubule-associated protein 2                                                            |
| 0,294634852 | 0,00356 | 0,448755025 | 0       | MAP2       | microtubule-associated protein 2                                                            |
| 0,619424349 | 0,03161 | 0,7944344   | 0,02832 | MAP2K4     | mitogen-activated protein kinase kinase 4                                                   |
| 0,550189305 | 0,01228 | 0,759435845 | 0,00106 | MAP2K4     | mitogen-activated protein kinase kinase 4                                                   |
| 0,61985385  | 0,01462 | 0,639936207 | 0,00022 | MAP3K9     | mitogen-activated protein kinase kinase kinase 9                                            |
| 0,630688704 | 0,0077  | 0,77271055  | 0,0048  | MAP4       | microtubule-associated protein 4                                                            |
| 1,529436278 | 0,03354 | 1,53261996  | 0,00006 | MAP4K1     | mitogen-activated protein kinase kinase kinase 1                                            |
| 0,836826243 | 0,02892 | 0,816768991 | 0,02413 | MAP4K4     | mitogen-activated protein kinase kinase kinase kinase 4                                     |
| 0,60667678  | 0,00259 | 0,689202576 | 0,00379 | MAP4K4     | mitogen-activated protein kinase kinase kinase kinase 4                                     |
| 0,764718139 | 0,04462 | 0,824733549 | 0,0079  | MAP4K4     | mitogen-activated protein kinase kinase kinase kinase 4                                     |
| 0,538120062 | 0,00809 | 0,630251696 | 0,0009  | MAP4K5     | mitogen-activated protein kinase kinase kinase kinase 5                                     |
| 0,496890547 | 0,00109 | 0,697371833 | 0,02539 | MAP4K5     | mitogen-activated protein kinase kinase kinase kinase 5                                     |
| 0,479299719 | 0,00635 | 0,639492791 | 0,01078 | MAP4K5     | mitogen-activated protein kinase kinase kinase kinase 5                                     |
| 0,612168196 | 0,00002 | 0,771105413 | 0,01033 | MAP7       | microtubule-associated protein 7                                                            |
| 0,555554364 | 0,04855 | 0,650220073 | 0,00004 | MAP7       | microtubule-associated protein 7                                                            |
| 0,637280314 | 0,00054 | 0,815637493 | 0,0091  | MAP7       | microtubule-associated protein 7                                                            |
| 0,698339266 | 0,02058 | 0,745872013 | 0,00079 | MAPK1      | mitogen-activated protein kinase 1                                                          |
| 0,508739846 | 0,00352 | 0,719965659 | 0,00079 | MAPK13     | mitogen-activated protein kinase 13                                                         |
| 0,577542892 | 0,00116 | 0,699792933 | 0,00009 | MAPK13     | mitogen-activated protein kinase 13                                                         |
| 0,587230986 | 0,02075 | 0,668963777 | 0,00015 | MAPK6      | mitogen-activated protein kinase 6                                                          |
| 0,717972255 | 0,00499 | 0,85027416  | 0,0405  | MAPK8      | mitogen-activated protein kinase 8                                                          |
| 0,744322628 | 0,02566 | 0,829894586 | 0,01781 | MAPKAP3    | mitogen-activated protein kinase-activated protein kinase 3                                 |
| 0,704660378 | 0,04255 | 0,811689581 | 0,00949 | MAPKAP3    | mitogen-activated protein kinase-activated protein kinase 3                                 |
| 0,735603373 | 0,01134 | 0,832775771 | 0,00493 | MAPKBP1    | mitogen-activated protein kinase binding protein 1                                          |
| 0,742261785 | 0,00962 | 0,859756486 | 0,00134 | MAPRE1     | microtubule-associated protein, RP/EB family, member 1                                      |
| 0,607939642 | 0,00426 | 0,788946841 | 0,00915 | MAPT       | microtubule-associated protein tau                                                          |
| 1,735077374 | 0,00069 | 1,436940177 | 0,00367 | MARCKSL1   | MARCKS-like 1                                                                               |
| 0,637722196 | 0,03576 | 0,815637493 | 0,00307 | MARK3      | MAP/microtubule affinity-regulating kinase 3                                                |
| 0,63860688  | 0,01922 | 0,785128119 | 0,00273 | MARK3      | MAP/microtubule affinity-regulating kinase 3                                                |
| 1,366040257 | 0,0142  | 1,130530567 | 0,02857 | MAS1       | MAS1 oncogene                                                                               |
| 1,271913007 | 0,01777 | 1,199139914 | 0,0024  | MASP1      | mannan-binding lectin serine peptidase 1 (C4/C2 activating component of Ra-reactive factor) |
| 1,480413298 | 0,01535 | 1,682958965 | 0,00041 | MAST1      | microtubule associated serine/threonine kinase 1                                            |
| 0,484980955 | 0,00187 | 0,785672517 | 0,00734 | MAST4      | microtubule associated serine/threonine kinase family member 4                              |
| 0,610050255 | 0,03207 | 0,674083866 | 0,00028 | MAST4      | microtubule associated serine/threonine kinase family member 4                              |
| 0,524494664 | 0,00211 | 0,680657058 | 0,00009 | MAST4      | microtubule associated serine/threonine kinase family member 4                              |
| 1,258757174 | 0,00756 | 1,121166078 | 0,04778 | MATN1      | matrilin 1, cartilage matrix protein                                                        |
| 0,501735874 | 0,00131 | 0,675487042 | 0,00041 | MATN2      | matrilin 2                                                                                  |
| 1,557249382 | 0,0013  | 1,28877463  | 0,00105 | MB21D1     | Mab-21 domain containing 1                                                                  |
| 1,178539408 | 0,03964 | 1,183451022 | 0,0466  | MC2R       | melanocortin 2 receptor (adrenocorticotrophic hormone)                                      |
| 1,420107359 | 0,01946 | 1,297738767 | 0,01333 | MC4R       | melanocortin 4 receptor                                                                     |
| 1,371733289 | 0,00626 | 1,194163187 | 0,01543 | MCAM       | melanoma cell adhesion molecule                                                             |
| 1,455989549 | 0,01715 | 1,300440147 | 0,01418 | MCAM       | melanoma cell adhesion molecule                                                             |
| 0,703684188 | 0,02116 | 0,874784765 | 0,01195 | MCCC1      | methylcrotonoyl-CoA carboxylase 1 (alpha)                                                   |
| 1,254402205 | 0,03864 | 1,209155676 | 0,01492 | MCHR1      | melanin-concentrating hormone receptor 1                                                    |
| 0,684441907 | 0,02292 | 0,796088099 | 0,0122  | MCM4       | minichromosome maintenance complex component 4                                              |
| 0,632439771 | 0,02619 | 0,792784137 | 0,00051 | MCM8       | minichromosome maintenance complex component 8                                              |
| 0,726482525 | 0,00857 | 0,722465199 | 0,00041 | MCMBP      | minichromosome maintenance complex binding protein                                          |
| 1,680627504 | 0,04818 | 1,373636233 | 0,01196 | MCTP1      | multiple C2 domains, transmembrane 1                                                        |
| 1,313121125 | 0,01109 | 1,125838586 | 0,01307 | MCTP2      | multiple C2 domains, transmembrane 2                                                        |
| 1,607701981 | 0,03187 | 0,840313752 | 0,04859 | MDFC       | MyoD family inhibitor domain containing                                                     |
| 0,828170661 | 0,02281 | 0,849684999 | 0,00125 | MDH2       | malate dehydrogenase 2, NAD (mitochondrial)                                                 |
| 1,356604327 | 0,03233 | 1,353786279 | 0,00025 | MDM2       | Mdm2 p53 binding protein homolog (mouse)                                                    |
| 0,592546385 | 0,02661 | 0,659296807 | 0,00021 | ME1        | malic enzyme 1, NADP(+)-dependent, cytosolic                                                |
| 0,751059963 | 0,02222 | 0,71400199  | 0,00362 | MEAF6      | MYST/Esa1-associated factor 6                                                               |
| 0,627635996 | 0,00396 | 0,841479482 | 0,04654 | MED1       | mediator complex subunit 1                                                                  |
| 1,23370717  | 0,03364 | 1,179356592 | 0,01183 | MED12L     | mediator complex subunit 12-like                                                            |
| 0,753667455 | 0,00941 | 0,718470088 | 0,0005  | MED17      | mediator complex subunit 17                                                                 |
| 0,754190038 | 0,00302 | 0,847332435 | 0,00992 | MED27      | mediator complex subunit 27                                                                 |
| 0,680657058 | 0,04709 | 0,677362489 | 0,00023 | MED4       | mediator complex subunit 4                                                                  |
| 0,685866644 | 0,02651 | 0,787853886 | 0,00766 | MED6       | mediator complex subunit 6                                                                  |
| 0,604158922 | 0,02953 | 0,730522189 | 0,04567 | MED6       | mediator complex subunit 6                                                                  |
| 0,643048742 | 0,04109 | 0,701735863 | 0,00399 | MED6       | mediator complex subunit 6                                                                  |
| 0,70270935  | 0,03502 | 0,740206649 | 0,00023 | MED8       | mediator complex subunit 8                                                                  |
| 1,414213562 | 0,02275 | 1,332374825 | 0,00245 | MEF2C      | myocyte enhancer factor 2C                                                                  |
| 1,984808749 | 0,00019 | 1,76418273  | 0,00048 | MEF2C      | myocyte enhancer factor 2C                                                                  |
| 1,995845438 | 0,00082 | 1,602139755 | 0,00046 | MEF2C      | myocyte enhancer factor 2C                                                                  |
| 1,528376521 | 0,00724 | 1,220946513 | 0,00382 | MEF2D      | myocyte enhancer factor 2D                                                                  |

|             |         |             |         |           |                                                                                                |
|-------------|---------|-------------|---------|-----------|------------------------------------------------------------------------------------------------|
| 0,52850902  | 0,01427 | 0,643940815 | 0,0006  | MEGF9     | multiple EGF-like-domains 9                                                                    |
| 0,631126016 | 0,00601 | 0,782954296 | 0,00812 | MEGF9     | multiple EGF-like-domains 9                                                                    |
| 2,167451934 | 0,00138 | 1,953417058 | 0,00002 | MEI1      | meiosis inhibitor 1                                                                            |
| 2,37841423  | 0,00151 | 2,220677667 | 0,00001 | MEI1      | meiosis inhibitor 1                                                                            |
| 0,545253866 | 0,00083 | 0,775930854 | 0,04325 | MEIS1     | Meis homeobox 1                                                                                |
| 0,455966583 | 0,00017 | 0,729510172 | 0,01459 | MEIS1     | Meis homeobox 1                                                                                |
| 1,544350266 | 0,00152 | 1,426025717 | 0,00051 | MEOX1     | mesenchyme homeobox 1                                                                          |
| 2,698205069 | 0       | 1,802500925 | 0,00001 | MERTK     | c-mer proto-oncogene tyrosine kinase                                                           |
| 1,337927555 | 0,03607 | 1,215879283 | 0,03905 | MERTK     | c-mer proto-oncogene tyrosine kinase                                                           |
| 1,286097483 | 0,0038  | 1,196648963 | 0,0026  | MESP1     | mesoderm posterior 1 homolog (mouse)                                                           |
| 0,628506687 | 0,02641 | 0,822450069 | 0,00381 | METAP1    | methionyl aminopeptidase 1                                                                     |
| 0,545253866 | 0,00633 | 0,735093668 | 0,00014 | METAP2    | methionyl aminopeptidase 2                                                                     |
| 0,5090926   | 0,02436 | 0,791685866 | 0,01029 | METRNL    | meteorin, glial cell differentiation regulator-like                                            |
| 0,679714121 | 0,00977 | 0,839731493 | 0,04117 | METTL6    | methyltransferase like 16                                                                      |
| 1,247465572 | 0,03838 | 1,190856849 | 0,00579 | METTL21B  | methyltransferase like 21B                                                                     |
| 0,709070018 | 0,04278 | 0,852634892 | 0,03507 | METTL3    | methyltransferase like 3                                                                       |
| 0,70759708  | 0,00429 | 0,76630998  | 0,0001  | METTL5    | methyltransferase like 5                                                                       |
| 0,836826243 | 0,04354 | 0,882091365 | 0,02393 | METTL6    | methyltransferase like 6                                                                       |
| 1,320422841 | 0,04034 | 1,180174343 | 0,02984 | METTL7A   | methyltransferase like 7A                                                                      |
| 0,542990928 | 0,00297 | 0,674083866 | 0,00025 | METTL8    | methyltransferase like 8                                                                       |
| 0,470087101 | 0,00305 | 0,716480825 | 0,00054 | METTL8    | methyltransferase like 8                                                                       |
| 0,689680461 | 0,00425 | 0,767373048 | 0,00011 | METTL8    | methyltransferase like 8                                                                       |
| 0,589269704 | 0,00479 | 0,608783009 | 0       | MFHAS1    | malignant fibrous histiocytoma amplified sequence 1                                            |
| 0,493116352 | 0,00076 | 0,68491649  | 0       | MFHAS1    | malignant fibrous histiocytoma amplified sequence 1                                            |
| 1,984808749 | 0,00028 | 1,701727459 | 0,00001 | MFNG      | MFNG O-fucosylpeptide 3-beta-N-acetylglucosaminyltransferase                                   |
| 0,655651007 | 0,04579 | 0,801625329 | 0,01777 | MFSD5     | major facilitator superfamily domain containing 5                                              |
| 0,422786144 | 0,01932 | 0,504875649 | 0,00109 | MFSD6     | major facilitator superfamily domain containing 6                                              |
| 0,576343173 | 0,00329 | 0,660669203 | 0       | MFSD6     | major facilitator superfamily domain containing 6                                              |
| 1,417157397 | 0,0164  | 1,268391399 | 0,0026  | MGAT3     | mannosyl (beta-1,4-)-glycoprotein beta-1,4-N-acetylglucosaminyltransferase                     |
| 1,388955136 | 0,01605 | 1,29145735  | 0,01896 | MGAT4A    | mannosyl (alpha-1,3-)-glycoprotein beta-1,4-N-acetylglucosaminyltransferase, isozyme A         |
| 0,828170661 | 0,01943 | 0,841479482 | 0,01096 | MGAT4B    | mannosyl (alpha-1,3-)-glycoprotein beta-1,4-N-acetylglucosaminyltransferase, isozyme B         |
| 0,732042848 | 0,0443  | 0,856781955 | 0,03586 | MGC12488  | hypothetical protein MGC12488                                                                  |
| 3,142690067 | 0,00009 | 1,882956929 | 0,00034 | MGC16075  | hypothetical LOC84847                                                                          |
| 0,646624466 | 0,02374 | 0,787853886 | 0,00192 | MGC21881  | hypothetical locus MGC21881                                                                    |
| 0,441657526 | 0,00306 | 0,738669032 | 0,00821 | MGLL      | monoglyceride lipase                                                                           |
| 0,718968266 | 0,01767 | 0,723467443 | 0,00259 | MGLL      | monoglyceride lipase                                                                           |
| 0,466839972 | 0,01186 | 0,569986636 | 0,00183 | MGST1     | microsomal glutathione S-transferase 1                                                         |
| 0,568408487 | 0,00005 | 0,76154437  | 0,02012 | MGST1     | microsomal glutathione S-transferase 1                                                         |
| 0,489370825 | 0,00041 | 0,730522189 | 0,0146  | MGST1     | microsomal glutathione S-transferase 1                                                         |
| 0,711531731 | 0,00883 | 0,838568184 | 0,01967 | MGST1     | microsomal glutathione S-transferase 1                                                         |
| 1,42800398  | 0,04635 | 1,464085696 | 0,00008 | MIAT      | myocardial infarction associated transcript (non-protein coding)                               |
| 2,001386775 | 0,00004 | 2,194663875 | 0,00001 | MIAT      | myocardial infarction associated transcript (non-protein coding)                               |
| 0,518709968 | 0,00024 | 0,683020128 | 0       | MICALCL   | MICAL C-terminal like                                                                          |
| 0,618995145 | 0,00186 | 0,734584317 | 0,00001 | MICALL1   | MICAL-like 1                                                                                   |
| 2,323017464 | 0,00001 | 1,670175839 | 0,00011 | MICB      | MHC class I polypeptide-related sequence B                                                     |
| 0,561360711 | 0,00226 | 0,76418826  | 0,00025 | MID1      | midline 1 (Opitz/BBB syndrome)                                                                 |
| 0,71946679  | 0,04574 | 0,768970416 | 0,0009  | MID1      | midline 1 (Opitz/BBB syndrome)                                                                 |
| 0,70027816  | 0,02791 | 0,685866644 | 0,00004 | MID2      | midline 2                                                                                      |
| 1,20163605  | 0,04953 | 1,136029265 | 0,03407 | MIER1     | mesoderm induction early response 1 homolog (Xenopus laevis)                                   |
| 0,605416542 | 0,00423 | 0,657927263 | 0,00001 | MINA      | MYC induced nuclear antigen                                                                    |
| 0,580351957 | 0,00261 | 0,708087719 | 0,00027 | MIOS      | missing oocyte, meiosis regulator, homolog (Drosophila)                                        |
| 0,615145672 | 0,01404 | 0,673150035 | 0       | MIOS      | missing oocyte, meiosis regulator, homolog (Drosophila)                                        |
| 0,709070018 | 0,01191 | 0,727994774 | 0,00003 | MIPPEP    | mitochondrial intermediate peptidase                                                           |
| 0,668500248 | 0,03519 | 0,72597914  | 0,00029 | MIPPEP    | mitochondrial intermediate peptidase                                                           |
| 2,404938498 | 0,00068 | 2,418311352 | 0,00003 | MIR143HG  | MIR143 host gene (non-protein coding)                                                          |
| 0,715984371 | 0,03723 | 0,691595315 | 0,00052 | MIR22HG   | MIR22 host gene (non-protein coding)                                                           |
| 0,642157904 | 0,00543 | 0,625031151 | 0       | MIS18A    | MIS18 kinetochore protein homolog A (S. pombe)                                                 |
| 0,682073917 | 0,02792 | 0,688247801 | 0,00471 | MITD1     | MIT, microtubule interacting and transport, domain containing 1                                |
| 1,25353302  | 0,01604 | 1,194991205 | 0,00513 | MIXL1     | Mix paired-like homeobox                                                                       |
| 0,60332196  | 0,00612 | 0,713012859 | 0       | MKI67IP   | MKI67 (FHA domain) interacting nucleolar phosphoprotein                                        |
| 1,561572985 | 0,00027 | 1,115739322 | 0,04102 | MKI67IP   | MKI67 (FHA domain) interacting nucleolar phosphoprotein                                        |
| 0,73153561  | 0,00831 | 0,768437591 | 0,00054 | MKKS      | Mckusick-Kaufman syndrome                                                                      |
| 1,327765158 | 0,00973 | 1,231144413 | 0,00096 | MKRN2     | makorin ring finger protein 2                                                                  |
| 0,688725023 | 0,00935 | 0,745872013 | 0,00022 | MLF1      | myeloid leukemia factor 1                                                                      |
| 0,76418826  | 0,01927 | 0,729510172 | 0,00002 | MLF1IP    | MLF1 interacting protein                                                                       |
| 0,729510172 | 0,03167 | 0,674083866 | 0,00001 | MLF1IP    | MLF1 interacting protein                                                                       |
| 1,43097652  | 0,02681 | 1,48582984  | 0,00001 | MLKL      | mixed lineage kinase domain-like                                                               |
| 0,662503509 | 0,02423 | 0,743291492 | 0,00003 | MLL3      | myeloid/lymphoid or mixed-lineage leukemia 3                                                   |
| 0,650220073 | 0,024   | 0,807201075 | 0,00393 | MLL4      | myeloid/lymphoid or mixed-lineage leukemia (trithorax homolog, Drosophila); translocated to, 4 |
| 0,734584317 | 0,01728 | 0,813943185 | 0,00121 | MMAB      | methylmalonic aciduria (cobalamin deficiency) cblB type                                        |
| 0,752623374 | 0,02097 | 0,77271055  | 0,00723 | MMADHC    | methylmalonic aciduria (cobalamin deficiency) cblD type, with homocystinuria                   |
| 5,007185835 | 0,00001 | 2,370185542 | 0,00001 | MME       | membrane metallo-endopeptidase                                                                 |
| 2,275210456 | 0,00005 | 2,074839873 | 0       | MME       | membrane metallo-endopeptidase                                                                 |
| 1,284315809 | 0,04576 | 1,25092908  | 0,01781 | MMP11     | matrix metallopeptidase 11 (stromelysin 3)                                                     |
| 2,730187436 | 0,00949 | 2,431758566 | 0,00394 | MMP12     | matrix metallopeptidase 12 (macrophage elastase)                                               |
| 1,387992719 | 0,01739 | 1,712376569 | 0       | MMP14     | matrix metallopeptidase 14 (membrane-inserted)                                                 |
| 1,479387509 | 0,03637 | 1,964279191 | 0,00001 | MMP14     | matrix metallopeptidase 14 (membrane-inserted)                                                 |
| 1,4054187   | 0,00757 | 1,545421099 | 0       | MMP14     | matrix metallopeptidase 14 (membrane-inserted)                                                 |
| 1,411275843 | 0,00083 | 1,20664392  | 0,02605 | MMP16     | matrix metallopeptidase 16 (membrane-inserted)                                                 |
| 1,300440147 | 0,02923 | 1,266634254 | 0,00027 | MMP19     | matrix metallopeptidase 19                                                                     |
| 1,529436278 | 0,0016  | 1,395710764 | 0,00152 | MMP25     | matrix metallopeptidase 25                                                                     |
| 2,375119332 | 0,00019 | 2,836280071 | 0       | MMP7      | matrix metallopeptidase 7 (matrilysin, uterine)                                                |
| 1,876442393 | 0,00639 | 1,952063522 | 0,0001  | MMP9      | matrix metallopeptidase 9 (gelatinase B, 92kDa gelatinase, 92kDa type IV collagenase)          |
| 0,624598063 | 0,00338 | 0,652929894 | 0,00027 | MN1       | meningioma (disrupted in balanced translocation) 1                                             |
| 1,876442393 | 0,00211 | 1,493813457 | 0,02662 | MNDA      | myeloid cell nuclear differentiation antigen                                                   |
| 0,818469182 | 0,04229 | 0,774855931 | 0,01518 | MNT       | MAX binding protein                                                                            |
| 1,374588696 | 0,00663 | 1,124278924 | 0,03963 | MNX1      | motor neuron and pancreas homeobox 1                                                           |
| 0,715984371 | 0,02118 | 0,716977624 | 0,00268 | MOBK1A    | MOB1, Mps One Binder kinase activator-like 1A (yeast)                                          |
| 0,496202187 | 0,00446 | 0,718470088 | 0,00032 | MORC4     | MORC family CW-type zinc finger 4                                                              |
| 1,231998073 | 0,03768 | 1,209155676 | 0,00473 | MORN1     | MORN repeat containing 1                                                                       |
| 1,557249382 | 0,00512 | 1,725482689 | 0,00092 | MPEG1     | macrophage expressed 1                                                                         |
| 1,586667686 | 0,00711 | 1,702907415 | 0,00038 | MPEG1     | macrophage expressed 1                                                                         |
| 0,595428425 | 0,00524 | 0,713507253 | 0       | MPHOSPH10 | M-phase phosphoprotein 10 (U3 small nucleolar ribonucleoprotein)                               |
| 1,159095952 | 0,04857 | 1,121166078 | 0,02917 | MPL       | myeloproliferative leukemia virus oncogene                                                     |
| 1,38991822  | 0,00188 | 1,187559666 | 0,04529 | MPP2      | membrane protein, palmitoylated 2 (MAGUK p55 subfamily member 2)                               |
| 0,518350551 | 0,00355 | 0,716977624 | 0,03838 | MPP7      | membrane protein, palmitoylated 7 (MAGUK p55 subfamily member 7)                               |
| 0,365261095 | 0,01679 | 0,484980955 | 0,01734 | MPP7      | membrane protein, palmitoylated 7 (MAGUK p55 subfamily member 7)                               |
| 0,462331639 | 0,03833 | 0,597081594 | 0,00004 | MPP7      | membrane protein, palmitoylated 7 (MAGUK p55 subfamily member 7)                               |

|             |         |             |         |         |                                                                                 |
|-------------|---------|-------------|---------|---------|---------------------------------------------------------------------------------|
| 2,626242251 | 0,0009  | 1,881652215 | 0,00002 | MPPED2  | metallophosphoesterase domain containing 2                                      |
| 1,424050196 | 0,02019 | 1,42899414  | 0,0001  | MPPED2  | metallophosphoesterase domain containing 2                                      |
| 0,55632506  | 0,01559 | 0,706127202 | 0,00312 | MPZL2   | myelin protein zero-like 2                                                      |
| 0,652929894 | 0,00516 | 0,772175133 | 0,00173 | MPZL2   | myelin protein zero-like 2                                                      |
| 0,520871715 | 0,00347 | 0,710053679 | 0,00071 | MPZL3   | myelin protein zero-like 3                                                      |
| 0,593779833 | 0,0012  | 0,802181166 | 0,0159  | MPZL3   | myelin protein zero-like 3                                                      |
| 1,231998073 | 0,03101 | 1,175276328 | 0,02483 | MR1     | major histocompatibility complex, class I-related                               |
| 1,25092908  | 0,01534 | 1,126619228 | 0,03047 | MRAP    | melanocortin 2 receptor accessory protein                                       |
| 1,30224419  | 0,01355 | 1,425037614 | 0,0001  | MRAS    | muscle RAS oncogene homolog                                                     |
| 1,490710387 | 0,02761 | 1,427014506 | 0,00324 | MRC1    | mannose receptor, C type 1                                                      |
| 0,636397468 | 0,01716 | 0,798298386 | 0,00033 | MRE11A  | MRE11 meiotic recombination 11 homolog A (S. cerevisiae)                        |
| 1,305859787 | 0,00343 | 1,151887642 | 0,0188  | MRO     | maestro                                                                         |
| 0,764718139 | 0,03186 | 0,768970416 | 0,00022 | MRPL1   | mitochondrial ribosomal protein L1                                              |
| 0,750019495 | 0,03158 | 0,800514811 | 0,01283 | MRPL13  | mitochondrial ribosomal protein L13                                             |
| 0,785128119 | 0,02022 | 0,823591017 | 0,00095 | MRPL15  | mitochondrial ribosomal protein L15                                             |
| 0,744322628 | 0,00617 | 0,866336856 | 0,0261  | MRPL22  | mitochondrial ribosomal protein L22                                             |
| 0,775393206 | 0,02259 | 0,768970416 | 0,00119 | MRPL3   | mitochondrial ribosomal protein L3                                              |
| 0,804966138 | 0,02986 | 0,79774524  | 0,00042 | MRPL32  | mitochondrial ribosomal protein L32                                             |
| 0,612592666 | 0,01158 | 0,868140228 | 0,00933 | MRPL35  | mitochondrial ribosomal protein L35                                             |
| 0,765248385 | 0,04004 | 0,855595026 | 0,00602 | MRPL36  | mitochondrial ribosomal protein L36                                             |
| 0,716977624 | 0,0305  | 0,784584098 | 0,00187 | MRPL39  | mitochondrial ribosomal protein L39                                             |
| 0,737134609 | 0,04649 | 0,87175824  | 0,00122 | MRPL4   | mitochondrial ribosomal protein L4                                              |
| 0,723467443 | 0,01551 | 0,784040454 | 0       | MRPL47  | mitochondrial ribosomal protein L47                                             |
| 0,750539549 | 0,0018  | 0,882702996 | 0,01472 | MRPL51  | mitochondrial ribosomal protein L51                                             |
| 0,670356296 | 0,00295 | 0,762600827 | 0,00417 | MRPS18C | mitochondrial ribosomal protein S18C                                            |
| 0,650670928 | 0,00493 | 0,894404902 | 0,03056 | MRPS21  | mitochondrial ribosomal protein S21                                             |
| 0,795536484 | 0,03955 | 0,844400887 | 0,00204 | MRPS22  | mitochondrial ribosomal protein S22                                             |
| 0,800514811 | 0,02279 | 0,891928519 | 0,00295 | MRPS27  | mitochondrial ribosomal protein S27                                             |
| 0,728499557 | 0,02235 | 0,79774524  | 0,0231  | MRPS28  | mitochondrial ribosomal protein S28                                             |
| 0,724973416 | 0,0454  | 0,781869643 | 0,00029 | MRPS36  | mitochondrial ribosomal protein S36                                             |
| 0,619424349 | 0,04003 | 0,802181166 | 0,00137 | MRPS9   | mitochondrial ribosomal protein S9                                              |
| 0,782411782 | 0,02887 | 0,846158597 | 0,0051  | MRRF    | mitochondrial ribosome recycling factor                                         |
| 1,494849249 | 0,02349 | 1,373636233 | 0,0002  | MRV1    | murine retrovirus integration site 1 homolog                                    |
| 1,657489809 | 0,00869 | 1,387992719 | 0,00307 | MRV1    | murine retrovirus integration site 1 homolog                                    |
| 2,319799309 | 0,00053 | 1,508380077 | 0,03995 | MS4A1   | membrane-spanning 4-domains, subfamily A, member 1                              |
| 1,422077411 | 0,02508 | 1,503161478 | 0,01196 | MS4A4A  | membrane-spanning 4-domains, subfamily A, member 4                              |
| 1,841651394 | 0,00838 | 2,050534476 | 0,00242 | MS4A4A  | membrane-spanning 4-domains, subfamily A, member 4                              |
| 1,30040147  | 0,00966 | 1,216722359 | 0,00897 | MS4A4A  | membrane-spanning 4-domains, subfamily A, member 4                              |
| 1,471206746 | 0,02098 | 1,388955136 | 0,00424 | MS4A6A  | membrane-spanning 4-domains, subfamily A, member 6A                             |
| 1,450952208 | 0,0037  | 1,407368375 | 0,00071 | MS4A6A  | membrane-spanning 4-domains, subfamily A, member 6A                             |
| 1,472226862 | 0,00281 | 1,500038989 | 0,00026 | MS4A6A  | membrane-spanning 4-domains, subfamily A, member 6A                             |
| 1,437936533 | 0,02352 | 1,442928687 | 0,00038 | MS4A6A  | membrane-spanning 4-domains, subfamily A, member 6A                             |
| 1,803750757 | 0,00191 | 1,36983298  | 0,00437 | MS4A7   | membrane-spanning 4-domains, subfamily A, member 7                              |
| 1,157490217 | 0,03822 | 1,132098902 | 0,01971 | MS4A8B  | membrane-spanning 4-domains, subfamily A, member 8B                             |
| 0,504525817 | 0,00371 | 0,660211421 | 0,00163 | MSH2    | mutS homolog 2, colon cancer, nonpolyposis type 1 (E. coli)                     |
| 0,643048742 | 0,00953 | 0,765778999 | 0,00002 | MSH3    | mutS homolog 3 (E. coli)                                                        |
| 1,275444392 | 0,03996 | 1,203303026 | 0,00959 | MSI2    | musashi homolog 2 (Drosophila)                                                  |
| 1,316766922 | 0,01196 | 1,179356592 | 0,00235 | MSI2    | musashi homolog 2 (Drosophila)                                                  |
| 0,727490342 | 0,00341 | 0,814507563 | 0,01731 | MSMB    | microseminoprotein, beta-                                                       |
| 0,729510172 | 0,0083  | 0,755236293 | 0,00058 | MSMB    | microseminoprotein, beta-                                                       |
| 0,574747424 | 0,00975 | 0,714992493 | 0,00229 | MSX2    | msh homeobox 2                                                                  |
| 0,639049682 | 0,0029  | 0,86934456  | 0,0229  | MTA3    | metastasis associated 1 family, member 3                                        |
| 0,785128119 | 0,04004 | 0,725476104 | 0,01703 | MTAP    | methylthioadenosine phosphorylase                                               |
| 0,624598063 | 0,00534 | 0,71548826  | 0,00035 | MTCH2   | mitochondrial carrier 2                                                         |
| 0,535515412 | 0,00129 | 0,589269704 | 0       | MTF1    | metal-regulatory transcription factor 1                                         |
| 1,267512522 | 0,03333 | 1,275444392 | 0,00475 | MTFP1   | mitochondrial fission process 1                                                 |
| 0,643940815 | 0,03781 | 0,821880187 | 0,00015 | MTIF2   | mitochondrial translational initiation factor 2                                 |
| 0,70270935  | 0,00816 | 0,789493887 | 0,0003  | MTMR1   | myotubularin related protein 1                                                  |
| 0,755236293 | 0,0112  | 0,846158597 | 0,00607 | MTMR1   | myotubularin related protein 1                                                  |
| 0,67877249  | 0,01597 | 0,808881348 | 0,00411 | MTMR10  | myotubularin related protein 10                                                 |
| 1,32317144  | 0,03733 | 1,304954948 | 0,00004 | MTMR9LP | myotubularin related protein 9-like, pseudogene                                 |
| 0,660211421 | 0,00751 | 0,8362464   | 0,01061 | MTRF1L  | mitochondrial translational release factor 1-like                               |
| 0,672683604 | 0,02191 | 0,772175133 | 0,00014 | MTSS1   | metastasis suppressor 1                                                         |
| 0,548285794 | 0,04204 | 0,781869643 | 0,04802 | MTUS1   | microtubule associated tumor suppressor 1                                       |
| 1,851892045 | 0,00432 | 1,715941061 | 0,00001 | MUC1    | mucin 1, cell surface associated                                                |
| 1,41029796  | 0,02376 | 1,387992719 | 0,00001 | MUC1    | mucin 1, cell surface associated                                                |
| 1,795020101 | 0,00272 | 1,448942155 | 0,00415 | MUC1    | mucin 1, cell surface associated                                                |
| 0,37579037  | 0,00339 | 0,508739846 | 0,00006 | MUC15   | mucin 15, cell surface associated                                               |
| 0,285388677 | 0,0001  | 0,498961359 | 0,00413 | MUC15   | mucin 15, cell surface associated                                               |
| 1,686462221 | 0,00937 | 1,685293659 | 0,00077 | MUC4    | mucin 4, cell surface associated                                                |
| 2,436820527 | 0,01148 | 2,067661472 | 0,00099 | MUC4    | mucin 4, cell surface associated                                                |
| 2,344044567 | 0,0028  | 1,854461093 | 0,00057 | MUC4    | mucin 4, cell surface associated                                                |
| 1,419123356 | 0,02636 | 1,468150636 | 0,0001  | MUCSAC  | mucin 5AC, oligomeric mucus/gel-forming                                         |
| 0,656105627 | 0,04628 | 0,685391402 | 0       | MUT     | methylmalonyl CoA mutase                                                        |
| 0,567621051 | 0,00483 | 0,770037174 | 0,00178 | MXI1    | MAX interactor 1                                                                |
| 1,225185332 | 0,01909 | 1,164733586 | 0,01347 | MXRA7   | matrix-remodelling associated 7                                                 |
| 0,651573575 | 0,00077 | 0,758383773 | 0,0365  | MYCL1   | v-myc myelocytomatosis viral oncogene homolog 1, lung carcinoma derived (avian) |
| 1,167158102 | 0,02229 | 1,112650121 | 0,0439  | MYCN    | v-myc myelocytomatosis viral related oncogene, neuroblastoma derived (avian)    |
| 1,162314108 | 0,03729 | 1,160703914 | 0,00379 | MYCT1   | myc target 1                                                                    |
| 1,811267966 | 0,00028 | 1,257884972 | 0,00482 | MYCT1   | myc target 1                                                                    |
| 1,456999114 | 0,02672 | 1,470187336 | 0,00064 | MYEF2   | myelin expression factor 2                                                      |
| 1,348167732 | 0,02824 | 1,343503426 | 0,00055 | MYH10   | myosin, heavy chain 10, non-muscle                                              |
| 1,681792831 | 0,0043  | 1,462057448 | 0,01101 | MYH11   | myosin, heavy chain 11, smooth muscle                                           |
| 0,765778999 | 0,04901 | 0,903752727 | 0,04548 | MYL12B  | myosin, light chain 12B, regulatory                                             |
| 0,804966138 | 0,01007 | 0,811127156 | 0,00076 | MYO10   | myosin X                                                                        |
| 0,649769531 | 0,04795 | 0,743291492 | 0,00012 | MYO19   | myosin XIX                                                                      |
| 0,729510172 | 0,01478 | 0,708087719 | 0,01105 | MYO1B   | myosin IB                                                                       |
| 0,696888619 | 0,01237 | 0,846745312 | 0,02828 | MYO1E   | myosin IE                                                                       |
| 1,675974269 | 0,00015 | 1,493813457 | 0,00062 | MYO1F   | myosin IF                                                                       |
| 1,394743666 | 0,03581 | 1,297738767 | 0,0034  | MYO1G   | myosin IG                                                                       |
| 1,71356391  | 0,01973 | 1,456999114 | 0,00068 | MYO1G   | myosin IG                                                                       |
| 0,510506063 | 0,00434 | 0,582366793 | 0,00001 | MYO5B   | myosin VB                                                                       |
| 0,604997045 | 0,00639 | 0,730522189 | 0,00024 | MYO5B   | myosin VB                                                                       |
| 0,438910899 | 0,00806 | 0,575145947 | 0       | MYO6    | myosin VI                                                                       |
| 1,330529041 | 0,02906 | 1,32592576  | 0,00002 | MYO7A   | myosin VIIA                                                                     |
| 1,278099363 | 0,03157 | 1,111108729 | 0,00792 | MYO7A   | myosin VIIA                                                                     |
| 0,626332219 | 0,01751 | 0,825877665 | 0,00137 | MYO9A   | myosin IXA                                                                      |
| 3,540615058 | 0,00008 | 4,058650186 | 0,00001 | MZB1    | marginal zone B and B1 cell-specific protein                                    |

|             |         |             |         |        |                                                         |
|-------------|---------|-------------|---------|--------|---------------------------------------------------------|
| 4,298996691 | 0,00129 | 5,819922735 | 0,00002 | MZB1   | marginal zone B and B1 cell-specific protein            |
| 1,219255094 | 0,03264 | 1,20664392  | 0,0094  | N6AMT1 | N-6 adenine-specific DNA methyltransferase 1 (putative) |
| 0,688247801 | 0,02782 | 0,750539549 | 0,00003 | NA     | NA                                                      |
| 0,520510799 | 0,03785 | 0,669891801 | 0,00331 | NA     | NA                                                      |
| 1,368883813 | 0,00398 | 1,387030969 | 0,00016 | NA     | NA                                                      |
| 0,708087719 | 0,00604 | 0,69399636  | 0,00002 | NA     | NA                                                      |
| 0,708578698 | 0,03005 | 0,767373048 | 0,00054 | NA     | NA                                                      |
| 1,442928687 | 0,04813 | 1,378405153 | 0,00229 | NA     | NA                                                      |
| 1,183451022 | 0,04167 | 1,158292806 | 0,02101 | NA     | NA                                                      |
| 0,791137301 | 0,02241 | 0,847332435 | 0,0282  | NA     | NA                                                      |
| 1,279872414 | 0,0458  | 0,831045862 | 0,02932 | NA     | NA                                                      |
| 0,573553512 | 0,00276 | 0,576742803 | 0,00001 | NA     | NA                                                      |
| 0,663882579 | 0,02618 | 0,804966138 | 0,0426  | NA     | NA                                                      |
| 1,25962998  | 0,04979 | 1,387992719 | 0,0053  | NA     | NA                                                      |
| 0,777546036 | 0,0217  | 0,868140228 | 0,01729 | NA     | NA                                                      |
| 1,585568273 | 0,00099 | 1,45296505  | 0,00113 | NA     | NA                                                      |
| 0,575544746 | 0,00274 | 0,629378587 | 0,00505 | NA     | NA                                                      |
| 0,687294348 | 0,02853 | 0,780786493 | 0,0011  | NA     | NA                                                      |
| 0,76630998  | 0,03061 | 0,839731493 | 0,01229 | NA     | NA                                                      |
| 0,736113431 | 0,03332 | 0,750539549 | 0,00016 | NA     | NA                                                      |
| 0,434973676 | 0,0452  | 0,61301743  | 0,00092 | NA     | NA                                                      |
| 0,578745108 | 0,04819 | 0,628071191 | 0,00561 | NA     | NA                                                      |
| 0,501735874 | 0,01888 | 0,530711604 | 0,00003 | NA     | NA                                                      |
| 0,644387315 | 0,00176 | 0,811127156 | 0,00189 | NA     | NA                                                      |
| 1,424050196 | 0,02897 | 1,163120042 | 0,04364 | NA     | NA                                                      |
| 1,545421099 | 0,02195 | 1,218410264 | 0,01861 | NA     | NA                                                      |
| 1,208317843 | 0,04551 | 1,144724161 | 0,00639 | NA     | NA                                                      |
| 1,339783602 | 0,00739 | 1,435944511 | 0,00022 | NA     | NA                                                      |
| 0,487677731 | 0,00407 | 0,566049451 | 0,00063 | NA     | NA                                                      |
| 0,745872013 | 0,0294  | 0,87539133  | 0,01485 | NA     | NA                                                      |
| 1,207480591 | 0,04276 | 1,180992661 | 0,02984 | NA     | NA                                                      |
| 1,633537982 | 0,04369 | 1,252664439 | 0,02349 | NA     | NA                                                      |
| 2,046274939 | 0,00197 | 1,607701981 | 0,00031 | NA     | NA                                                      |
| 1,159899655 | 0,04885 | 1,146312186 | 0,00247 | NA     | NA                                                      |
| 1,296839555 | 0,01242 | 1,257884972 | 0,00182 | NA     | NA                                                      |
| 1,335148303 | 0,00332 | 1,320422841 | 0,00241 | NA     | NA                                                      |
| 0,568014632 | 0,01589 | 0,709561678 | 0,00425 | NA     | NA                                                      |
| 1,354724977 | 0,01021 | 1,199971382 | 0,01249 | NA     | NA                                                      |
| 1,244011653 | 0,04573 | 1,159899655 | 0,00287 | NA     | NA                                                      |
| 1,850608856 | 0,00385 | 1,38991822  | 0,02512 | NA     | NA                                                      |
| 0,546010273 | 0,00658 | 0,652025368 | 0,00005 | NA     | NA                                                      |
| 0,550570799 | 0,02098 | 0,541862983 | 0       | NA     | NA                                                      |
| 1,509425969 | 0,00215 | 1,303147149 | 0,01827 | NA     | NA                                                      |
| 1,710004356 | 0,00001 | 1,317679952 | 0,00677 | NA     | NA                                                      |
| 0,703684188 | 0,04042 | 0,697371833 | 0,00298 | NA     | NA                                                      |
| 0,490389502 | 0,00328 | 0,473356816 | 0       | NA     | NA                                                      |
| 1,17609125  | 0,03663 | 1,088997015 | 0,04153 | NA     | NA                                                      |
| 0,768437591 | 0,02937 | 0,829894586 | 0,00505 | NA     | NA                                                      |
| 0,725476104 | 0,00187 | 0,744838732 | 0,0014  | NA     | NA                                                      |
| 2,174976782 | 0,0022  | 1,998614186 | 0,0002  | NA     | NA                                                      |
| 0,470739232 | 0,00001 | 0,586824089 | 0,00001 | NA     | NA                                                      |
| 0,590087172 | 0,00027 | 0,701249625 | 0,00041 | NA     | NA                                                      |
| 0,785672517 | 0,04578 | 0,798851916 | 0,00532 | NA     | NA                                                      |
| 0,734075318 | 0,00544 | 0,813379198 | 0,00635 | NA     | NA                                                      |
| 0,730522189 | 0,03414 | 0,805524291 | 0,01723 | NA     | NA                                                      |
| 0,604997045 | 0,00464 | 0,804408371 | 0,02858 | NA     | NA                                                      |
| 0,660211421 | 0,0401  | 0,701735863 | 0,00003 | NA     | NA                                                      |
| 0,658383461 | 0,00184 | 0,828170661 | 0,01471 | NA     | NA                                                      |
| 1,517819253 | 0,00723 | 1,525201653 | 0,00003 | NA     | NA                                                      |
| 0,751059963 | 0,00454 | 0,701249625 | 0,00002 | NA     | NA                                                      |
| 0,734075318 | 0,00301 | 0,70270935  | 0,0001  | NA     | NA                                                      |
| 1,243149669 | 0,03859 | 1,139183377 | 0,00746 | NA     | NA                                                      |
| 0,785672517 | 0,00879 | 0,846158597 | 0,04491 | NA     | NA                                                      |
| 0,541862983 | 0,00489 | 0,678302164 | 0,00047 | NA     | NA                                                      |
| 0,781869643 | 0,01857 | 0,862741345 | 0,00832 | NA     | NA                                                      |
| 2,139094176 | 0,00248 | 1,401527449 | 0,03281 | NA     | NA                                                      |
| 0,802181166 | 0,01715 | 0,851453708 | 0,00315 | NA     | NA                                                      |
| 0,816203046 | 0,02294 | 0,856781955 | 0,01007 | NA     | NA                                                      |
| 1,407368375 | 0,0024  | 1,329607108 | 0,00001 | NA     | NA                                                      |
| 1,53368266  | 0,01709 | 1,444930398 | 0,00004 | NA     | NA                                                      |
| 1,285206337 | 0,0178  | 1,231998073 | 0,00339 | NA     | NA                                                      |
| 0,701735863 | 0,00139 | 0,648869383 | 0,00004 | NA     | NA                                                      |
| 1,374588696 | 0,01818 | 1,373636233 | 0,00073 | NA     | NA                                                      |
| 1,439931319 | 0,00665 | 1,321338406 | 0,00026 | NA     | NA                                                      |
| 0,685866644 | 0,00731 | 0,759962428 | 0,00598 | NA     | NA                                                      |
| 2,785622961 | 0       | 2,162949527 | 0       | NA     | NA                                                      |
| 0,840896415 | 0,03648 | 0,90062598  | 0,0112  | NA     | NA                                                      |
| 1,448942155 | 0,02778 | 1,271031689 | 0,00512 | NA     | NA                                                      |
| 1,343503426 | 0,0032  | 1,237132479 | 0,0056  | NA     | NA                                                      |
| 0,615572207 | 0,00545 | 0,664342907 | 0       | NA     | NA                                                      |
| 1,316766922 | 0,01781 | 1,200803427 | 0,00686 | NA     | NA                                                      |
| 1,28877463  | 0,00924 | 1,282536603 | 0,00196 | NA     | NA                                                      |
| 1,296839555 | 0,01838 | 1,247465572 | 0,00108 | NA     | NA                                                      |
| 1,33422317  | 0,00833 | 1,225185332 | 0,01741 | NA     | NA                                                      |
| 1,273677475 | 0,04821 | 1,185914499 | 0,00997 | NA     | NA                                                      |
| 1,298638603 | 0,01964 | 1,411275843 | 0,00038 | NA     | NA                                                      |
| 1,231998073 | 0,02666 | 1,134455485 | 0,03331 | NA     | NA                                                      |
| 1,249196126 | 0,04652 | 1,246601194 | 0,00176 | NA     | NA                                                      |
| 1,2397077   | 0,01268 | 1,151887642 | 0,03188 | NA     | NA                                                      |
| 0,794985251 | 0,00724 | 0,853817714 | 0,01263 | NA     | NA                                                      |
| 1,229438867 | 0,0319  | 1,197478705 | 0,0041  | NA     | NA                                                      |
| 4,178543051 | 0,00422 | 3,950403446 | 0,00005 | NA     | NA                                                      |
| 1,226884977 | 0,01971 | 1,173648178 | 0,01349 | NA     | NA                                                      |
| 0,714992493 | 0,01815 | 0,817335328 | 0,01074 | NA     | NA                                                      |
| 1,715941061 | 0,01761 | 1,25092908  | 0,00081 | NA     | NA                                                      |
| 0,595015848 | 0,00241 | 0,740206649 | 0,00541 | NA     | NA                                                      |
| 0,314253344 | 0,00001 | 0,492092011 | 0       | NA     | NA                                                      |
| 1,260503392 | 0,03267 | 1,315854525 | 0,00049 | NA     | NA                                                      |

|             |         |             |         |    |    |
|-------------|---------|-------------|---------|----|----|
| 1,307671349 | 0,02553 | 1,333298677 | 0,00037 | NA | NA |
| 1,266634254 | 0,04987 | 1,125058485 | 0,03797 | NA | NA |
| 1,278985581 | 0,02154 | 1,170398641 | 0,018   | NA | NA |
| 1,20664392  | 0,01986 | 1,2397077   | 0,01241 | NA | NA |
| 1,185914499 | 0,04592 | 1,143138335 | 0,02645 | NA | NA |
| 0,793333843 | 0,01338 | 0,792234811 | 0,00005 | NA | NA |
| 1,506290467 | 0,00177 | 1,342572503 | 0,00004 | NA | NA |
| 1,28788163  | 0,02746 | 1,154285418 | 0,02039 | NA | NA |
| 1,268391399 | 0,02822 | 1,141554707 | 0,00942 | NA | NA |
| 0,729510172 | 0,02744 | 0,821310701 | 0,00461 | NA | NA |
| 0,539240216 | 0,00746 | 0,679243142 | 0,00015 | NA | NA |
| 1,204972315 | 0,0212  | 1,227735684 | 0,00308 | NA | NA |
| 0,581560021 | 0,00616 | 0,686342216 | 0       | NA | NA |
| 2,127265346 | 0,00025 | 1,698192493 | 0,00003 | NA | NA |
| 1,53261996  | 0,00162 | 1,392811481 | 0,00045 | NA | NA |
| 0,582770599 | 0,02071 | 0,544121221 | 0,00017 | NA | NA |
| 1,283425898 | 0,04235 | 1,173648178 | 0,00582 | NA | NA |
| 2,240778428 | 0,0002  | 1,488645255 | 0,00027 | NA | NA |
| 1,393777239 | 0,0034  | 1,221793102 | 0,00018 | NA | NA |
| 1,613283518 | 0,00129 | 1,307671349 | 0,00006 | NA | NA |
| 1,194163187 | 0,01945 | 1,210833084 | 0,00054 | NA | NA |
| 0,807201075 | 0,01416 | 0,885153765 | 0,02194 | NA | NA |
| 1,447938172 | 0,01024 | 1,174461971 | 0,0368  | NA | NA |
| 0,782954296 | 0,00438 | 0,842062954 | 0,01586 | NA | NA |
| 1,699369998 | 0,00306 | 1,514666316 | 0,00044 | NA | NA |
| 2,216064696 | 0,00032 | 1,935894054 | 0,0001  | NA | NA |
| 0,581560021 | 0,00203 | 0,709561678 | 0,00004 | NA | NA |
| 1,183451022 | 0,04148 | 1,238848698 | 0,00102 | NA | NA |
| 1,396678532 | 0,00271 | 1,276328769 | 0,00371 | NA | NA |
| 1,386069886 | 0,00296 | 1,208317843 | 0,03026 | NA | NA |
| 1,339783602 | 0,02427 | 1,311302014 | 0,00218 | NA | NA |
| 0,787853886 | 0,02037 | 0,843815796 | 0,00952 | NA | NA |
| 1,155085785 | 0,04631 | 1,139183377 | 0,01783 | NA | NA |
| 0,615999037 | 0,00079 | 0,677362489 | 0,00053 | NA | NA |
| 1,427014506 | 0,00287 | 1,220946513 | 0,00229 | NA | NA |
| 1,387992719 | 0,03081 | 1,232852325 | 0,00972 | NA | NA |
| 1,197478705 | 0,0363  | 1,137605228 | 0,0427  | NA | NA |
| 1,240567298 | 0,04754 | 1,194991205 | 0,00263 | NA | NA |
| 1,209155676 | 0,04895 | 1,191682575 | 0,00215 | NA | NA |
| 0,730522189 | 0,04937 | 0,781869643 | 0,00185 | NA | NA |
| 1,569168196 | 0,0188  | 1,374588696 | 0,0026  | NA | NA |
| 1,223488041 | 0,03005 | 1,226884977 | 0,00175 | NA | NA |
| 1,283425898 | 0,03337 | 1,248330549 | 0,0002  | NA | NA |
| 0,780786493 | 0,03375 | 0,853817714 | 0,02315 | NA | NA |
| 0,559806444 | 0,00573 | 0,639492791 | 0,00062 | NA | NA |
| 0,602486157 | 0,00316 | 0,765778999 | 0,00045 | NA | NA |
| 0,509445598 | 0,0037  | 0,628506687 | 0       | NA | NA |
| 1,32408891  | 0,01508 | 1,147902414 | 0,01516 | NA | NA |
| 1,242288282 | 0,03657 | 1,106497353 | 0,04921 | NA | NA |
| 1,316766922 | 0,00595 | 1,203303026 | 0,0002  | NA | NA |
| 0,440434687 | 0,00135 | 0,571965487 | 0,00001 | NA | NA |
| 0,768970416 | 0,02926 | 0,73153561  | 0,00102 | NA | NA |
| 0,797192477 | 0,04202 | 0,787853886 | 0,0083  | NA | NA |
| 1,242288282 | 0,04229 | 1,188383105 | 0,04865 | NA | NA |
| 0,793333843 | 0,02273 | 0,808320869 | 0,00516 | NA | NA |
| 1,274560627 | 0,01401 | 1,199971382 | 0,01512 | NA | NA |
| 0,706127202 | 0,0199  | 0,792234811 | 0,0088  | NA | NA |
| 0,657015814 | 0,00098 | 0,70514898  | 0,00012 | NA | NA |
| 0,730016005 | 0,04683 | 0,694477568 | 0,01119 | NA | NA |
| 1,278985581 | 0,01345 | 1,151089491 | 0,00888 | NA | NA |
| 0,692554734 | 0,02055 | 0,855595026 | 0,00586 | NA | NA |
| 1,454980684 | 0,00717 | 1,230291345 | 0,00472 | NA | NA |
| 0,709070018 | 0,01497 | 0,852634892 | 0,01067 | NA | NA |
| 0,697855382 | 0,02703 | 0,888842681 | 0,01462 | NA | NA |
| 0,629378587 | 0,03616 | 0,796088099 | 0,03349 | NA | NA |
| 0,557096825 | 0,01424 | 0,790589117 | 0,02024 | NA | NA |
| 1,780151467 | 0,0045  | 1,555092072 | 0,00063 | NA | NA |
| 1,828930179 | 0,01331 | 1,346300069 | 0,02367 | NA | NA |
| 0,527045712 | 0,00315 | 0,753667455 | 0,00033 | NA | NA |
| 1,326845141 | 0,00268 | 1,17609125  | 0,0141  | NA | NA |
| 2,423345321 | 0,01178 | 1,708819482 | 0,00637 | NA | NA |
| 0,561360711 | 0,00288 | 0,743806881 | 0,00019 | NA | NA |
| 1,460032011 | 0,00347 | 1,53581027  | 0,00021 | NA | NA |
| 2,005552872 | 0,00004 | 1,563739286 | 0,00135 | NA | NA |
| 1,56049096  | 0,00092 | 1,320422841 | 0,00212 | NA | NA |
| 1,544350266 | 0,02988 | 1,712376569 | 0,00058 | NA | NA |
| 1,606587994 | 0,00285 | 1,278985581 | 0,00008 | NA | NA |
| 1,398616083 | 0,03128 | 1,231998073 | 0,00389 | NA | NA |
| 0,295248165 | 0,00087 | 0,667111585 | 0,00308 | NA | NA |
| 1,350974085 | 0,04769 | 1,356604327 | 0,0001  | NA | NA |
| 0,522680005 | 0,00374 | 0,738157203 | 0,04849 | NA | NA |
| 0,736623843 | 0,03816 | 0,892546971 | 0,04829 | NA | NA |
| 1,70408819  | 0,00132 | 1,249196126 | 0,00246 | NA | NA |
| 1,261377409 | 0,03327 | 1,352848231 | 0,00001 | NA | NA |
| 2,295804828 | 0,00221 | 2,730187436 | 0,00003 | NA | NA |
| 2,0907202   | 0,00207 | 2,083486858 | 0,00002 | NA | NA |
| 0,596667872 | 0,00881 | 0,657015814 | 0,00997 | NA | NA |
| 0,482968164 | 0,01617 | 0,656560563 | 0,00249 | NA | NA |
| 0,623732786 | 0,00692 | 0,67689314  | 0,00349 | NA | NA |
| 0,691116103 | 0,04073 | 0,741233505 | 0,01122 | NA | NA |
| 1,723092319 | 0,00348 | 1,439931319 | 0,00004 | NA | NA |
| 1,390881972 | 0,03593 | 1,45195828  | 0       | NA | NA |
| 1,710004356 | 0,00014 | 1,352848231 | 0,01181 | NA | NA |
| 0,660669203 | 0,0411  | 0,785672517 | 0,00156 | NA | NA |
| 1,589970502 | 0,00318 | 1,282536603 | 0,00205 | NA | NA |
| 1,204137381 | 0,0413  | 1,168777249 | 0,03177 | NA | NA |
| 1,644900137 | 0,01694 | 1,89605393  | 0,00027 | NA | NA |
| 1,341642225 | 0,00555 | 1,173648178 | 0,03595 | NA | NA |

|              |         |             |         |    |    |
|--------------|---------|-------------|---------|----|----|
| 1,289668251  | 0,02627 | 1,28788163  | 0,00237 | NA | NA |
| 1,4063932    | 0,00927 | 1,320422841 | 0,02184 | NA | NA |
| 1,640345822  | 0,00079 | 1,531557997 | 0       | NA | NA |
| 3,429504147  | 0,01126 | 4,41373496  | 0,00016 | NA | NA |
| 3,267075964  | 0,00785 | 3,701217712 | 0,00009 | NA | NA |
| 1,607701981  | 0,01472 | 1,815038311 | 0,00025 | NA | NA |
| 4,03340982   | 0,01521 | 4,629960868 | 0,00005 | NA | NA |
| 1,541142217  | 0,00309 | 1,300440147 | 0,00148 | NA | NA |
| 3,474968741  | 0,00368 | 3,765913858 | 0,00004 | NA | NA |
| 3,443796753  | 0,00242 | 3,863745316 | 0,00008 | NA | NA |
| 3,543070076  | 0,0097  | 4,106758183 | 0,00005 | NA | NA |
| 3,491870365  | 0,00043 | 2,334316204 | 0,00003 | NA | NA |
| 2,973165969  | 0,03993 | 4,665397479 | 0,00005 | NA | NA |
| 3,020945171  | 0,02494 | 4,779964819 | 0,0002  | NA | NA |
| 1,394743666  | 0,00647 | 1,32592576  | 0,00054 | NA | NA |
| 2,440201021  | 0,00519 | 2,381713699 | 0,00001 | NA | NA |
| 3,1058755    | 0,00293 | 3,193193545 | 0,00003 | NA | NA |
| 2,51925996   | 0,02195 | 2,756810306 | 0,00001 | NA | NA |
| 3,516158244  | 0,00276 | 3,944930818 | 0,00003 | NA | NA |
| 1,708819482  | 0,00165 | 1,32408891  | 0,00165 | NA | NA |
| 1,633537982  | 0,04962 | 1,866065983 | 0,00135 | NA | NA |
| 2,615342697  | 0,00416 | 3,1058755   | 0,00003 | NA | NA |
| 3,893317497  | 0,00243 | 3,625047753 | 0,00001 | NA | NA |
| 0,755236293  | 0,02861 | 0,874784765 | 0,00597 | NA | NA |
| 1,376495602  | 0,03176 | 1,17772279  | 0,03995 | NA | NA |
| 2,233025924  | 0,00333 | 1,857033705 | 0,00017 | NA | NA |
| 0,590087172  | 0,00522 | 0,763658749 | 0,00001 | NA | NA |
| 0,726986259  | 0,04646 | 0,818469182 | 0,00287 | NA | NA |
| 0,698339266  | 0,03814 | 0,689680461 | 0       | NA | NA |
| 1,755643595  | 0,00633 | 1,747145792 | 0,00024 | NA | NA |
| 1,53581027   | 0,00519 | 1,477338064 | 0,00004 | NA | NA |
| 0,78024548   | 0,03474 | 0,78132788  | 0,00405 | NA | NA |
| 1,952063522  | 0,02439 | 1,666706414 | 0,00881 | NA | NA |
| 0,775930854  | 0,04176 | 0,762072415 | 0,0032  | NA | NA |
| 1,643760375  | 0,00005 | 1,541142217 | 0,00045 | NA | NA |
| 0,536258308  | 0,00129 | 0,525222272 | 0,00001 | NA | NA |
| 0,743806881  | 0,02903 | 0,757858283 | 0,01092 | NA | NA |
| 1,714752073  | 0,00823 | 1,48552921  | 0,00705 | NA | NA |
| 1,808758755  | 0,00959 | 1,422077411 | 0,00275 | NA | NA |
| 0,664803554  | 0,02137 | 0,690637224 | 0,00147 | NA | NA |
| 2,321407829  | 0,00004 | 2,122846418 | 0,00052 | NA | NA |
| 1,914542916  | 0,00006 | 2,143546925 | 0       | NA | NA |
| 1,851892045  | 0,00003 | 1,31494276  | 0,0065  | NA | NA |
| 0,626332219  | 0,0353  | 0,633317127 | 0       | NA | NA |
| 0,524131238  | 0,04866 | 0,743806881 | 0,00305 | NA | NA |
| 3,597513249  | 0,00906 | 4,313921727 | 0,00002 | NA | NA |
| 0,784040454  | 0,03329 | 0,883927531 | 0,0155  | NA | NA |
| 0,560583039  | 0,00086 | 0,773246337 | 0,00199 | NA | NA |
| 1,880348405  | 0,04517 | 1,392811481 | 0,00654 | NA | NA |
| 2,119905567  | 0,00004 | 1,873842894 | 0,00007 | NA | NA |
| 1,212512819  | 0,03493 | 1,17609125  | 0,02612 | NA | NA |
| 1,479387509  | 0,04237 | 1,984808749 | 0,00066 | NA | NA |
| 0,652929894  | 0,0108  | 0,720464874 | 0,00727 | NA | NA |
| 2,613530508  | 0,02789 | 4,158317741 | 0,00011 | NA | NA |
| 1,682958965  | 0,01811 | 1,459020344 | 0,00586 | NA | NA |
| 1,51887169   | 0,04286 | 1,420107359 | 0,00254 | NA | NA |
| 0,556710809  | 0,00997 | 0,690637224 | 0,00001 | NA | NA |
| 1,28877463   | 0,04486 | 1,159095952 | 0,02005 | NA | NA |
| 1,281647924  | 0,03048 | 1,204972315 | 0,04716 | NA | NA |
| 0,814507563  | 0,04431 | 0,806641759 | 0,0006  | NA | NA |
| 0,69495911   | 0,0463  | 0,623300597 | 0,00023 | NA | NA |
| 1,306765254  | 0,02747 | 1,153485605 | 0,04929 | NA | NA |
| 0,540362701  | 0,01266 | 0,680185426 | 0,00374 | NA | NA |
| 1,674812975  | 0,00261 | 1,29145735  | 0,02469 | NA | NA |
| 1,769080871  | 0,00211 | 1,684125907 | 0,00003 | NA | NA |
| 3,7921107861 | 0,00777 | 3,994458664 | 0,00005 | NA | NA |
| 0,498270131  | 0,04932 | 0,541862983 | 0,00017 | NA | NA |
| 0,541862983  | 0,00119 | 0,821310701 | 0,00719 | NA | NA |
| 1,336074078  | 0,02346 | 1,347233577 | 0,00043 | NA | NA |
| 1,352848231  | 0,01417 | 1,176906737 | 0,01072 | NA | NA |
| 1,73748437   | 0,00046 | 1,476314406 | 0,00025 | NA | NA |
| 0,70027816   | 0,03442 | 0,811127156 | 0,00079 | NA | NA |
| 2,572194967  | 0,03387 | 3,660396673 | 0,00015 | NA | NA |
| 0,765778999  | 0,03747 | 0,877213549 | 0,02235 | NA | NA |
| 1,52308874   | 0,00078 | 1,564823563 | 0,00299 | NA | NA |
| 0,802181166  | 0,04689 | 0,797192477 | 0,00516 | NA | NA |
| 1,615521555  | 0,00584 | 1,647182035 | 0,00028 | NA | NA |
| 2,8108374    | 0,00221 | 3,714067409 | 0,00002 | NA | NA |
| 0,683967652  | 0,00368 | 0,752101876 | 0,00641 | NA | NA |
| 4,9588308    | 0,00744 | 5,123039445 | 0,00003 | NA | NA |
| 0,597081594  | 0,02128 | 0,661127303 | 0,00006 | NA | NA |
| 0,716977624  | 0,03581 | 0,807201075 | 0,00486 | NA | NA |
| 3,533260206  | 0,00122 | 4,118160334 | 0,00002 | NA | NA |
| 2,946495372  | 0,00873 | 3,652793    | 0,00002 | NA | NA |
| 3,434261746  | 0,0172  | 4,877020376 | 0,00003 | NA | NA |
| 1,458009379  | 0,00628 | 1,431968741 | 0,00403 | NA | NA |
| 1,313121125  | 0,01983 | 1,487613762 | 0,04916 | NA | NA |
| 3,008407503  | 0,00172 | 3,319578342 | 0,00015 | NA | NA |
| 2,973165969  | 0,02083 | 4,37414183  | 0,00016 | NA | NA |
| 1,36983298   | 0,01447 | 1,159095952 | 0,00509 | NA | NA |
| 0,768970416  | 0,01002 | 0,842062954 | 0,00222 | NA | NA |
| 0,573553512  | 0,0047  | 0,840313752 | 0,04877 | NA | NA |
| 1,249196126  | 0,04108 | 1,243149669 | 0,00693 | NA | NA |
| 1,923854909  | 0,0012  | 1,561572985 | 0,00024 | NA | NA |
| 3,853047576  | 0,00071 | 3,673104649 | 0,00005 | NA | NA |
| 1,937236378  | 0,01179 | 1,961558008 | 0,00001 | NA | NA |
| 1,305859787  | 0,01002 | 1,264003098 | 0,0017  | NA | NA |
| 3,43664302   | 0,00085 | 4,441355335 | 0,00003 | NA | NA |

|             |         |             |         |    |    |
|-------------|---------|-------------|---------|----|----|
| 3,073750363 | 0,02925 | 4,401514437 | 0,00003 | NA | NA |
| 3,319578342 | 0,00184 | 2,37676621  | 0,00027 | NA | NA |
| 2,608101471 | 0,00072 | 3,557835974 | 0       | NA | NA |
| 2,857988279 | 0,0066  | 3,683302789 | 0,00009 | NA | NA |
| 1,20664392  | 0,04682 | 1,089752112 | 0,04989 | NA | NA |
| 1,203303026 | 0,04333 | 1,194991205 | 0,00027 | NA | NA |
| 3,552907183 | 0,01258 | 4,850051276 | 0,00001 | NA | NA |
| 1,237990291 | 0,0119  | 1,20664392  | 0,0478  | NA | NA |
| 3,244508622 | 0,00517 | 3,155787363 | 0,00002 | NA | NA |
| 0,767905135 | 0,01501 | 0,839149637 | 0,01145 | NA | NA |
| 2,308570835 | 0,00396 | 2,20992897  | 0,00008 | NA | NA |
| 3,108029075 | 0,01411 | 3,964118253 | 0,00001 | NA | NA |
| 3,29664834  | 0,02507 | 4,251582697 | 0,00005 | NA | NA |
| 2,952628811 | 0,00099 | 2,873880353 | 0,0001  | NA | NA |
| 1,45195828  | 0,0355  | 1,353786279 | 0,00345 | NA | NA |
| 0,695923196 | 0,00484 | 0,87175824  | 0,00374 | NA | NA |
| 3,287520749 | 0,00521 | 5,270719807 | 0       | NA | NA |
| 4,03900519  | 0,00611 | 5,024569525 | 0,00003 | NA | NA |
| 5,256126509 | 0,00147 | 7,180080405 | 0,00001 | NA | NA |
| 1,29056249  | 0,02442 | 1,335148303 | 0,00036 | NA | NA |
| 0,69399636  | 0,00297 | 0,855595026 | 0,00256 | NA | NA |
| 2,496661098 | 0,00291 | 2,74156561  | 0,00005 | NA | NA |
| 3,010493495 | 0,00204 | 2,938337267 | 0,00003 | NA | NA |
| 1,609932275 | 0,00031 | 1,409320755 | 0,00009 | NA | NA |
| 0,639936207 | 0,02493 | 0,782954296 | 0,02123 | NA | NA |
| 1,341642225 | 0,04879 | 1,459020344 | 0,00037 | NA | NA |
| 0,662044455 | 0,03544 | 0,795536484 | 0,00551 | NA | NA |
| 0,76630998  | 0,02368 | 0,877213549 | 0,0176  | NA | NA |
| 1,219255094 | 0,03032 | 1,150291893 | 0,01494 | NA | NA |
| 0,829894586 | 0,04404 | 0,89564567  | 0,02279 | NA | NA |
| 0,577943353 | 0,01245 | 0,683967652 | 0       | NA | NA |
| 0,72597914  | 0,00658 | 0,773782497 | 0,02254 | NA | NA |
| 0,748461493 | 0,01547 | 0,855002178 | 0,0201  | NA | NA |
| 0,691595315 | 0,00412 | 0,844400887 | 0,00437 | NA | NA |
| 0,632439771 | 0,01337 | 0,69640574  | 0,00008 | NA | NA |
| 0,368567304 | 0,00013 | 0,553248677 | 0,00139 | NA | NA |
| 0,71548826  | 0,0349  | 0,796640096 | 0,00141 | NA | NA |
| 0,786217292 | 0,04179 | 0,877213549 | 0,01704 | NA | NA |
| 0,659296807 | 0,00846 | 0,775393206 | 0,00077 | NA | NA |
| 0,616426163 | 0,00602 | 0,780786493 | 0,00489 | NA | NA |
| 0,613442489 | 0,02103 | 0,76101669  | 0,00001 | NA | NA |
| 0,689680461 | 0,01312 | 0,822450069 | 0,00506 | NA | NA |
| 0,629378587 | 0,01002 | 0,69399636  | 0,00001 | NA | NA |
| 1,25092908  | 0,00314 | 1,17609125  | 0,00201 | NA | NA |
| 1,42800398  | 0,00304 | 1,312211255 | 0,00517 | NA | NA |
| 0,655651007 | 0,00631 | 0,714992493 | 0,00043 | NA | NA |
| 1,871246996 | 0,00055 | 1,550786413 | 0,00054 | NA | NA |
| 0,633317127 | 0,04695 | 0,597081594 | 0       | NA | NA |
| 1,359428242 | 0,01464 | 1,237132479 | 0,00076 | NA | NA |
| 1,965641197 | 0,00052 | 1,62788637  | 0,00048 | NA | NA |
| 0,767373048 | 0,04413 | 0,908148418 | 0,04432 | NA | NA |
| 1,431968741 | 0,00361 | 1,119612889 | 0,0252  | NA | NA |
| 0,514056913 | 0,01175 | 0,573156093 | 0,00001 | NA | NA |
| 1,199139914 | 0,02538 | 1,21335356  | 0,00548 | NA | NA |
| 1,778917987 | 0,00086 | 1,71356391  | 0,00026 | NA | NA |
| 0,613867842 | 0,02121 | 0,829894586 | 0,00088 | NA | NA |
| 0,641268301 | 0,00462 | 0,7944344   | 0,00217 | NA | NA |
| 1,396678532 | 0,02025 | 1,268391399 | 0,00085 | NA | NA |
| 1,308578071 | 0,00326 | 1,162314108 | 0,01003 | NA | NA |
| 2,604488379 | 0,00577 | 1,815038311 | 0,00002 | NA | NA |
| 1,235418637 | 0,02334 | 1,2397077   | 0,00021 | NA | NA |
| 0,735093668 | 0,04449 | 0,872967591 | 0,04421 | NA | NA |
| 0,630688704 | 0,0091  | 0,749499801 | 0,00382 | NA | NA |
| 0,626332219 | 0,00191 | 0,863938187 | 0,00851 | NA | NA |
| 0,668500248 | 0,03328 | 0,886996305 | 0,00898 | NA | NA |
| 1,188383105 | 0,04938 | 1,146312186 | 0,02945 | NA | NA |
| 0,601651513 | 0,0409  | 0,841479482 | 0,02656 | NA | NA |
| 1,414213562 | 0,00672 | 1,278985581 | 0,00374 | NA | NA |
| 1,21167266  | 0,00818 | 1,132883885 | 0,01819 | NA | NA |
| 0,744322628 | 0,02631 | 0,820172911 | 0,00695 | NA | NA |
| 0,673616788 | 0,01615 | 0,824162085 | 0,00197 | NA | NA |
| 0,576343173 | 0,01031 | 0,880259014 | 0,03659 | NA | NA |
| 0,71548826  | 0,03318 | 0,787307977 | 0,00067 | NA | NA |
| 0,723969086 | 0,00715 | 0,868140228 | 0,00835 | NA | NA |
| 0,655651007 | 0,00031 | 0,765778999 | 0,0003  | NA | NA |
| 0,724973416 | 0,01374 | 0,831045862 | 0,00153 | NA | NA |
| 1,328685814 | 0,01716 | 1,337927555 | 0,00215 | NA | NA |
| 1,31494276  | 0,03653 | 1,217566019 | 0,00964 | NA | NA |
| 0,71400199  | 0,01255 | 0,826450318 | 0,00873 | NA | NA |
| 0,678302164 | 0,03511 | 0,672683604 | 0,00458 | NA | NA |
| 0,473685035 | 0,0025  | 0,689202576 | 0,00009 | NA | NA |
| 0,709561678 | 0,02993 | 0,794985251 | 0,02452 | NA | NA |
| 0,690637224 | 0,01679 | 0,697371833 | 0,01166 | NA | NA |
| 0,642603169 | 0,02248 | 0,736113431 | 0,00066 | NA | NA |
| 0,615572207 | 0,00404 | 0,737134609 | 0,00257 | NA | NA |
| 0,549046407 | 0,00098 | 0,667111585 | 0,00003 | NA | NA |
| 2,096524951 | 0,00047 | 1,656341323 | 0,00053 | NA | NA |
| 0,723467443 | 0,0276  | 0,892546971 | 0,02906 | NA | NA |
| 1,604362333 | 0,02334 | 1,444930398 | 0,01488 | NA | NA |
| 1,38991822  | 0,02344 | 1,409320755 | 0,00501 | NA | NA |
| 0,598739352 | 0,00013 | 0,7944344   | 0,00293 | NA | NA |
| 0,636838738 | 0,00392 | 0,786762445 | 0,00144 | NA | NA |
| 0,508035071 | 0,00661 | 0,649319301 | 0       | NA | NA |
| 1,275444392 | 0,04039 | 1,207480591 | 0,00347 | NA | NA |
| 0,783497187 | 0,02466 | 0,845572287 | 0,03492 | NA | NA |
| 1,404444876 | 0,02994 | 1,282536603 | 0,02884 | NA | NA |
| 0,813379198 | 0,04225 | 0,833353207 | 0,00322 | NA | NA |
| 0,50697974  | 0,00456 | 0,596254436 | 0,00046 | NA | NA |



|              |         |             |         |    |    |
|--------------|---------|-------------|---------|----|----|
| 0,720964436  | 0,02388 | 0,801069878 | 0,00094 | NA | NA |
| 1,988940337  | 0,0001  | 1,815038311 | 0       | NA | NA |
| 0,687770909  | 0,04281 | 0,652477474 | 0,00018 | NA | NA |
| 0,531447837  | 0,00221 | 0,658839976 | 0,00002 | NA | NA |
| 1,575707772  | 0,0045  | 1,473247686 | 0,00047 | NA | NA |
| 0,573156093  | 0,00773 | 0,818469182 | 0,0039  | NA | NA |
| 0,674083866  | 0,03176 | 0,76101669  | 0,00001 | NA | NA |
| 1,215879283  | 0,04603 | 1,168777249 | 0,02104 | NA | NA |
| 0,755759964  | 0,01347 | 0,752101876 | 0,0001  | NA | NA |
| 1,434949535  | 0,00164 | 1,32408891  | 0,00009 | NA | NA |
| 0,699308041  | 0,01471 | 0,755236293 | 0,0002  | NA | NA |
| 0,594603558  | 0,00179 | 0,610050255 | 0,00002 | NA | NA |
| 2,51925996   | 0,00894 | 1,626758396 | 0,0081  | NA | NA |
| 0,423079298  | 0,00005 | 0,637722196 | 0,00513 | NA | NA |
| 2,489748471  | 0,00003 | 2,115501927 | 0,00005 | NA | NA |
| 1,616641738  | 0,00779 | 1,620006947 | 0,00012 | NA | NA |
| 0,573553512  | 0,00566 | 0,67877249  | 0,0008  | NA | NA |
| 0,773246337  | 0,02992 | 0,755236293 | 0,00013 | NA | NA |
| 1,284315809  | 0,00341 | 1,242288282 | 0,02158 | NA | NA |
| 0,754712984  | 0,00676 | 0,794985251 | 0,0061  | NA | NA |
| 1,227735684  | 0,01842 | 1,145517898 | 0,02096 | NA | NA |
| 0,78132788   | 0,04866 | 0,837406488 | 0,00704 | NA | NA |
| 0,731028724  | 0,03587 | 0,719965659 | 0,00044 | NA | NA |
| 0,520510799  | 0,01705 | 0,812815602 | 0,01259 | NA | NA |
| 1,368883813  | 0,01031 | 1,112650121 | 0,02324 | NA | NA |
| 2,549121255  | 0,00095 | 1,506290467 | 0,01415 | NA | NA |
| 0,76418826   | 0,04363 | 0,7944344   | 0,00464 | NA | NA |
| 0,532554102  | 0,00452 | 0,743291492 | 0,01595 | NA | NA |
| 0,74277646   | 0,02511 | 0,748461493 | 0,0001  | NA | NA |
| 1,377450046  | 0,00633 | 1,112650121 | 0,02887 | NA | NA |
| 0,790041312  | 0,01307 | 0,866336856 | 0,0419  | NA | NA |
| 0,554784736  | 0,00081 | 0,710053679 | 0,01364 | NA | NA |
| 2,401606855  | 0,00005 | 1,305859787 | 0,03577 | NA | NA |
| 2,264197804  | 0,00117 | 1,677136369 | 0,00013 | NA | NA |
| 0,717972255  | 0,04415 | 0,84323111  | 0,02936 | NA | NA |
| 0,632001549  | 0,0358  | 0,70759708  | 0,00021 | NA | NA |
| 1,55293775   | 0,00768 | 1,172834949 | 0,00437 | NA | NA |
| 1,569168196  | 0,00258 | 1,337927555 | 0,00539 | NA | NA |
| 0,545253866  | 0,00272 | 0,683967652 | 0,00034 | NA | NA |
| 1,295940965  | 0,02625 | 1,136029265 | 0,02378 | NA | NA |
| 0,680657058  | 0,00695 | 0,586011142 | 0       | NA | NA |
| 0,477972659  | 0,01003 | 0,438302861 | 0       | NA | NA |
| 0,609627547  | 0,01947 | 0,728499557 | 0,03092 | NA | NA |
| 0,571173123  | 0,00531 | 0,633756261 | 0,00001 | NA | NA |
| 2,613530508  | 0,00037 | 1,659789171 | 0,01451 | NA | NA |
| 1,199971382  | 0,03699 | 1,117287138 | 0,04152 | NA | NA |
| 0,575145947  | 0,01317 | 0,662044455 | 0,02771 | NA | NA |
| 1,398616083  | 0,04969 | 1,208317843 | 0,01311 | NA | NA |
| 0,682546859  | 0,0123  | 0,622437118 | 0,00048 | NA | NA |
| 1,218410264  | 0,03019 | 1,146312186 | 0,01363 | NA | NA |
| 1,467133344  | 0,03332 | 1,501079098 | 0,00007 | NA | NA |
| 1,266634254  | 0,02333 | 1,170398641 | 0,04134 | NA | NA |
| 0,500693628  | 0,00627 | 0,645728675 | 0,00001 | NA | NA |
| 0,779704843  | 0,03216 | 0,752101876 | 0,00368 | NA | NA |
| 1,224336392  | 0,01585 | 1,113421618 | 0,02112 | NA | NA |
| 0,493800431  | 0,00333 | 0,613867842 | 0,00001 | NA | NA |
| 1,193335743  | 0,04459 | 1,184271612 | 0,01682 | NA | NA |
| 2,531513188  | 0,00058 | 1,501079098 | 0,00427 | NA | NA |
| 0,586824089  | 0,00431 | 0,704660378 | 0,00015 | NA | NA |
| 0,313383255  | 0,00125 | 0,517991382 | 0,00004 | NA | NA |
| 1,489677463  | 0,00369 | 1,22010051  | 0,00367 | NA | NA |
| 1,969732886  | 0,02486 | 1,194163187 | 0,0261  | NA | NA |
| 1,300440147  | 0,00945 | 1,200803427 | 0,00628 | NA | NA |
| 1,215036792  | 0,03824 | 1,30224419  | 0,00595 | NA | NA |
| 0,459456442  | 0,00169 | 0,552482242 | 0       | NA | NA |
| 0,637280314  | 0,0008  | 0,852634892 | 0,00521 | NA | NA |
| 1,53368266   | 0,00194 | 1,23370717  | 0,00186 | NA | NA |
| 1,249196126  | 0,03928 | 1,155085785 | 0,02267 | NA | NA |
| 0,576343173  | 0,03527 | 0,689680461 | 0,00138 | NA | NA |
| 1,285206337  | 0,02829 | 1,199139914 | 0,01582 | NA | NA |
| 1,215879283  | 0,02394 | 1,109569472 | 0,04156 | NA | NA |
| 0,622868708  | 0,00986 | 0,768437591 | 0,00262 | NA | NA |
| 0,435275282  | 0,00392 | 0,536258308 | 0       | NA | NA |
| 1,638073396  | 0,02534 | 1,332374825 | 0,00061 | NA | NA |
| 0,71449707   | 0,00418 | 0,797192477 | 0,00215 | NA | NA |
| 0,754712984  | 0,03114 | 0,791685866 | 0,00336 | NA | NA |
| 1,185092771  | 0,02535 | 1,138394029 | 0,00597 | NA | NA |
| 0,670356296  | 0,00031 | 0,678302164 | 0,00086 | NA | NA |
| 1,204972315  | 0,02563 | 1,331451613 | 0,00248 | NA | NA |
| 0,387159514  | 0,00016 | 0,578344092 | 0,00003 | NA | NA |
| 1,296839555  | 0,03028 | 1,38991822  | 0,0199  | NA | NA |
| 0,675018993  | 0,00042 | 0,741233505 | 0,00696 | NA | NA |
| 0,493116352  | 0,04859 | 0,67689314  | 0,00019 | NA | NA |
| 0,667574152  | 0,03558 | 0,730522189 | 0,00006 | NA | NA |
| 0,570381858  | 0,0012  | 0,846158597 | 0,03806 | NA | NA |
| 1,382232207  | 0,00647 | 1,322254605 | 0,0004  | NA | NA |
| 2,133171562  | 0,00247 | 1,576800348 | 0,00643 | NA | NA |
| 1,230291345  | 0,03322 | 1,162314108 | 0,01742 | NA | NA |
| 0,5998985691 | 0,0173  | 0,833931044 | 0,04595 | NA | NA |
| 0,66342257   | 0,00217 | 0,788400174 | 0,00112 | NA | NA |
| 0,773246337  | 0,04699 | 0,797192477 | 0,00094 | NA | NA |
| 0,542238704  | 0,01252 | 0,62676651  | 0,00082 | NA | NA |
| 0,752623374  | 0,03815 | 0,798851916 | 0,00346 | NA | NA |
| 1,375541818  | 0,00394 | 1,219255094 | 0,02891 | NA | NA |
| 1,849326556  | 0,01915 | 1,541142217 | 0,00667 | NA | NA |
| 0,683967652  | 0,03337 | 0,709561678 | 0,00368 | NA | NA |
| 0,452189689  | 0,00021 | 0,599154511 | 0       | NA | NA |
| 1,556170353  | 0,00416 | 1,229438867 | 0,02723 | NA | NA |

|             |         |             |         |    |    |
|-------------|---------|-------------|---------|----|----|
| 0,630251696 | 0,03867 | 0,615145672 | 0,0001  | NA | NA |
| 0,747424624 | 0,03864 | 0,784040454 | 0,00893 | NA | NA |
| 0,671286251 | 0,02878 | 0,708578698 | 0,00026 | NA | NA |
| 0,735093668 | 0,00622 | 0,805524291 | 0,00725 | NA | NA |
| 1,427014506 | 0,00214 | 1,30224419  | 0,00194 | NA | NA |
| 0,578745108 | 0,00426 | 0,739693755 | 0,00015 | NA | NA |
| 1,138394029 | 0,04297 | 1,108800644 | 0,01606 | NA | NA |
| 0,69495911  | 0,0162  | 0,812252396 | 0,0361  | NA | NA |
| 0,557096825 | 0,01001 | 0,561749952 | 0       | NA | NA |
| 0,704172113 | 0,02952 | 0,723467443 | 0,00359 | NA | NA |
| 0,693034943 | 0,02908 | 0,820172911 | 0,03277 | NA | NA |
| 0,796640096 | 0,01538 | 0,835087919 | 0,00966 | NA | NA |
| 0,621144141 | 0,0352  | 0,679714121 | 0       | NA | NA |
| 1,710004356 | 0,00557 | 1,378405153 | 0,00006 | NA | NA |
| 1,572434584 | 0,00715 | 1,348167732 | 0,00255 | NA | NA |
| 1,445932295 | 0,0208  | 1,337927555 | 0,00008 | NA | NA |
| 1,662091723 | 0,00373 | 1,256142381 | 0,03843 | NA | NA |
| 0,710053679 | 0,03822 | 0,821880187 | 0,00102 | NA | NA |
| 0,729004689 | 0,03111 | 0,846158597 | 0,00743 | NA | NA |
| 2,385017745 | 0,00006 | 1,929196369 | 0,00034 | NA | NA |
| 0,640379931 | 0,00934 | 0,691116103 | 0,00002 | NA | NA |
| 0,722966147 | 0,01428 | 0,787307977 | 0,00808 | NA | NA |
| 0,671286251 | 0,00021 | 0,723467443 | 0,0003  | NA | NA |
| 0,361984543 | 0,00023 | 0,581560021 | 0,0005  | NA | NA |
| 0,628071191 | 0,02228 | 0,708087719 | 0,04382 | NA | NA |
| 1,167158102 | 0,02768 | 1,143138335 | 0,00406 | NA | NA |
| 0,592546385 | 0,0141  | 0,588861395 | 0,00036 | NA | NA |
| 0,398044049 | 0,00006 | 0,556710809 | 0,00001 | NA | NA |
| 0,474342158 | 0,00546 | 0,520871715 | 0,00003 | NA | NA |
| 0,697855382 | 0,00402 | 0,849096246 | 0,00444 | NA | NA |
| 1,17772279  | 0,0305  | 1,4063932   | 0,00002 | NA | NA |
| 1,604362333 | 0,00171 | 1,45296505  | 0,00102 | NA | NA |
| 1,339783602 | 0,04494 | 1,229438867 | 0,03435 | NA | NA |
| 1,257884972 | 0,04335 | 1,104198847 | 0,04945 | NA | NA |
| 2,11696879  | 0,00336 | 2,302178983 | 0,00014 | NA | NA |
| 1,284315809 | 0,0494  | 1,164733586 | 0,02109 | NA | NA |
| 0,623732786 | 0,01209 | 0,706127202 | 0       | NA | NA |
| 1,343503426 | 0,00895 | 1,118837101 | 0,02779 | NA | NA |
| 0,703684188 | 0,00271 | 0,780786493 | 0,00774 | NA | NA |
| 1,275444392 | 0,01264 | 1,312211255 | 0,00114 | NA | NA |
| 1,32408891  | 0,00464 | 1,238848698 | 0,00108 | NA | NA |
| 0,76101669  | 0,03122 | 0,818469182 | 0,02991 | NA | NA |
| 0,746906729 | 0,00544 | 0,840896415 | 0,03399 | NA | NA |
| 1,229438867 | 0,02709 | 1,21335356  | 0,00199 | NA | NA |
| 1,289668251 | 0,04292 | 1,31494276  | 0,00109 | NA | NA |
| 1,278985581 | 0,02808 | 1,229438867 | 0,02784 | NA | NA |
| 0,720464874 | 0,01837 | 0,798851916 | 0,00132 | NA | NA |
| 1,215036792 | 0,03602 | 1,148698355 | 0,04029 | NA | NA |
| 0,622005827 | 0,00145 | 0,76418826  | 0,00028 | NA | NA |
| 0,671286251 | 0,01904 | 0,724471077 | 0,00005 | NA | NA |
| 3,936736088 | 0,00337 | 4,976046613 | 0,00002 | NA | NA |
| 2,294214048 | 0,00698 | 2,226843236 | 0,00006 | NA | NA |
| 2,950582914 | 0,00005 | 2,672148157 | 0,00001 | NA | NA |
| 2,907945035 | 0,00448 | 2,834314793 | 0,00026 | NA | NA |
| 1,272794935 | 0,02773 | 1,320422841 | 0,00062 | NA | NA |
| 3,157975547 | 0,00239 | 2,722628233 | 0,00238 | NA | NA |
| 1,199971382 | 0,03526 | 1,139183377 | 0,02799 | NA | NA |
| 1,164733586 | 0,04075 | 1,087488391 | 0,02127 | NA | NA |
| 1,268391399 | 0,02128 | 1,271031689 | 0,00005 | NA | NA |
| 0,84323111  | 0,04209 | 0,836826243 | 0,00296 | NA | NA |
| 1,460032011 | 0,00986 | 1,436940177 | 0,00018 | NA | NA |
| 1,240567298 | 0,01409 | 1,156688184 | 0,02338 | NA | NA |
| 0,538120062 | 0,02537 | 0,648419777 | 0,00403 | NA | NA |
| 0,689202576 | 0,02634 | 0,856188285 | 0,04387 | NA | NA |
| 3,253516793 | 0,037   | 4,856779538 | 0,00001 | NA | NA |
| 1,198309021 | 0,03417 | 1,149494848 | 0,04872 | NA | NA |
| 3,34962595  | 0,01691 | 3,647732662 | 0,00077 | NA | NA |
| 3,333412829 | 0,01291 | 4,81988926  | 0,00007 | NA | NA |
| 1,624504793 | 0,04335 | 1,242288282 | 0,00737 | NA | NA |
| 0,577542892 | 0,04564 | 0,525222272 | 0,00002 | NA | NA |
| 2,347296357 | 0,00027 | 1,62788637  | 0,00004 | NA | NA |
| 0,582770599 | 0,0014  | 0,672683604 | 0,00372 | NA | NA |
| 1,450952208 | 0,00389 | 1,360370852 | 0,00162 | NA | NA |
| 1,383190629 | 0,00968 | 1,279872414 | 0,00308 | NA | NA |
| 0,759962428 | 0,03519 | 0,775393206 | 0,00073 | NA | NA |
| 1,231998073 | 0,03333 | 1,192508872 | 0,01565 | NA | NA |
| 1,237990291 | 0,04628 | 1,258757174 | 0,00014 | NA | NA |
| 1,392811481 | 0,00635 | 1,243149669 | 0,02129 | NA | NA |
| 1,787570325 | 0,00007 | 1,514666316 | 0,00071 | NA | NA |
| 0,682073917 | 0,0086  | 0,725476104 | 0,00002 | NA | NA |
| 0,549046407 | 0,00172 | 0,555169417 | 0       | NA | NA |
| 0,608783009 | 0,0026  | 0,628506687 | 0,00003 | NA | NA |
| 0,713012859 | 0,02525 | 0,883315051 | 0,02444 | NA | NA |
| 0,791137301 | 0,01325 | 0,76630998  | 0,00003 | NA | NA |
| 0,671286251 | 0,01742 | 0,801069878 | 0,00446 | NA | NA |
| 3,321880096 | 0,00004 | 3,412904392 | 0,00001 | NA | NA |
| 0,721464343 | 0,01023 | 0,860352631 | 0,03932 | NA | NA |
| 0,589269704 | 0,00072 | 0,790589117 | 0,00772 | NA | NA |
| 0,677832163 | 0,00101 | 0,683020128 | 0,00012 | NA | NA |
| 1,22858698  | 0,03161 | 1,214194884 | 0,00212 | NA | NA |
| 1,313121125 | 0,03201 | 1,235418637 | 0,00612 | NA | NA |
| 1,548638056 | 0,01712 | 1,665551542 | 0,00012 | NA | NA |
| 0,752623374 | 0,02551 | 0,791685866 | 0,00119 | NA | NA |
| 2,261061134 | 0,0006  | 1,671333918 | 0,00001 | NA | NA |
| 4,61394242  | 0,00001 | 3,441410522 | 0       | NA | NA |
| 0,782411782 | 0,02189 | 0,792784137 | 0,00137 | NA | NA |
| 1,263127262 | 0,01303 | 1,195819797 | 0,00828 | NA | NA |
| 0,574349177 | 0,00594 | 0,640379931 | 0,00011 | NA | NA |

|             |         |             |         |    |
|-------------|---------|-------------|---------|----|
| 0,783497187 | 0,04869 | 0,760489377 | 0,00234 | NA |
| 1,503161478 | 0,0299  | 1,215036792 | 0,0443  | NA |
| 0,688725023 | 0,02857 | 0,799960128 | 0,00969 | NA |
| 2,826467288 | 0,00006 | 1,510472586 | 0,00749 | NA |
| 0,585605091 | 0,03163 | 0,529609167 | 0,00001 | NA |
| 1,375541818 | 0,0009  | 1,157490217 | 0,02767 | NA |
| 0,558643569 | 0,0043  | 0,691595315 | 0,00645 | NA |
| 0,651573575 | 0,01075 | 0,837987135 | 0,03488 | NA |
| 1,198309021 | 0,04265 | 1,245737416 | 0,00043 | NA |
| 2,674000991 | 0,00221 | 1,823866331 | 0,00033 | NA |
| 1,286989247 | 0,0275  | 1,164733586 | 0,01741 | NA |
| 1,281647924 | 0,01248 | 1,184271612 | 0,02583 | NA |
| 0,76154437  | 0,04171 | 0,825305409 | 0,0065  | NA |
| 1,350974085 | 0,00621 | 1,132098902 | 0,032   | NA |
| 2,191623533 | 0,00078 | 1,622254311 | 0,00112 | NA |
| 1,248330549 | 0,04701 | 1,200803427 | 0,00873 | NA |
| 1,443929196 | 0,00094 | 1,305859787 | 0,02526 | NA |
| 0,568014632 | 0,00101 | 0,641712949 | 0,00001 | NA |
| 1,602139755 | 0,00047 | 1,216722359 | 0,01444 | NA |
| 0,60667678  | 0,03091 | 0,550189305 | 0,00223 | NA |
| 1,190031696 | 0,02904 | 1,114966219 | 0,04901 | NA |
| 1,231998073 | 0,03344 | 1,132883885 | 0,01163 | NA |
| 1,393777239 | 0,02209 | 1,276328769 | 0,01129 | NA |
| 0,720964436 | 0,00098 | 0,823020345 | 0,0045  | NA |
| 0,743806881 | 0,04333 | 0,73153561  | 0,00098 | NA |
| 2,051956291 | 0,00091 | 1,43893358  | 0,00441 | NA |
| 1,264879542 | 0,04368 | 1,118837101 | 0,03558 | NA |
| 2,329467173 | 0,00669 | 1,69466487  | 0,00068 | NA |
| 0,688725023 | 0,02742 | 0,774319028 | 0,0074  | NA |
| 1,787570325 | 0,00649 | 1,420107359 | 0,00529 | NA |
| 1,367935304 | 0,01106 | 1,167158102 | 0,01894 | NA |
| 1,279872414 | 0,01804 | 1,172022284 | 0,0204  | NA |
| 1,413233644 | 0,03315 | 1,337927555 | 0,01249 | NA |
| 0,618566239 | 0,01005 | 0,709070018 | 0,00042 | NA |
| 0,615145672 | 0,01084 | 0,71449707  | 0,00048 | NA |
| 1,52414483  | 0,0105  | 1,21335356  | 0,01038 | NA |
| 1,657489809 | 0,00048 | 1,17609125  | 0,01979 | NA |
| 0,588045625 | 0,02167 | 0,582366793 | 0,00486 | NA |
| 1,218410264 | 0,03106 | 1,194163187 | 0,00479 | NA |
| 1,322254605 | 0,04921 | 1,270150983 | 0,00013 | NA |
| 1,435944511 | 0,01443 | 1,337927555 | 0,01246 | NA |
| 1,29056249  | 0,01259 | 1,22603486  | 0,02008 | NA |
| 0,669427628 | 0,00589 | 0,628942486 | 0,00011 | NA |
| 0,806641759 | 0,01205 | 0,825305409 | 0,00237 | NA |
| 0,66342257  | 0,02421 | 0,680657058 | 0,00271 | NA |
| 1,35754498  | 0,01761 | 1,17772279  | 0,00848 | NA |
| 0,653382627 | 0,00214 | 0,570777354 | 0,00009 | NA |
| 1,275444392 | 0,0302  | 1,143138335 | 0,03841 | NA |
| 1,351910833 | 0,00228 | 1,260503392 | 0,00622 | NA |
| 1,20664392  | 0,04092 | 1,246601194 | 0,00025 | NA |
| 1,312211255 | 0,03609 | 1,190031696 | 0,00206 | NA |
| 1,254402205 | 0,02109 | 1,152686347 | 0,00149 | NA |
| 1,585568273 | 0,00294 | 1,149494848 | 0,03437 | NA |
| 0,569197015 | 0,02323 | 0,584793832 | 0,00001 | NA |
| 0,621144141 | 0,02272 | 0,592135806 | 0,00328 | NA |
| 0,590496331 | 0,00409 | 0,750019495 | 0,00072 | NA |
| 0,448755025 | 0,01189 | 0,642157904 | 0,00088 | NA |
| 1,634670657 | 0,01345 | 1,338855257 | 0,01562 | NA |
| 2,140577397 | 0,02208 | 1,411275843 | 0,00606 | NA |
| 2,059080167 | 0,0016  | 1,564823563 | 0,00479 | NA |
| 1,956126947 | 0,00981 | 1,397646972 | 0,00046 | NA |
| 0,765248385 | 0,03861 | 0,839149637 | 0,01653 | NA |
| 0,681129017 | 0,00181 | 0,844400887 | 0,04436 | NA |
| 0,595841287 | 0,00414 | 0,685391402 | 0,00122 | NA |
| 0,474013483 | 0,00115 | 0,760489377 | 0,00111 | NA |
| 0,803293997 | 0,01435 | 0,77916458  | 0,00165 | NA |
| 0,841479482 | 0,03569 | 1,220946513 | 0,01653 | NA |
| 0,775930854 | 0,04952 | 0,774855931 | 0,00766 | NA |
| 1,274560627 | 0,02731 | 1,20664392  | 0,00701 | NA |
| 0,594191553 | 0,00407 | 0,685866644 | 0,00044 | NA |
| 0,579547976 | 0,00043 | 0,847919965 | 0,02026 | NA |
| 0,647072827 | 0,0081  | 0,784040454 | 0,01668 | NA |
| 0,69399636  | 0,03925 | 0,763658749 | 0,00053 | NA |
| 0,574349177 | 0,00457 | 0,842062954 | 0,00565 | NA |
| 0,721964598 | 0,03698 | 0,789493887 | 0,0357  | NA |
| 0,678302164 | 0,0129  | 0,85797053  | 0,03167 | NA |
| 0,668963777 | 0,00084 | 0,822450069 | 0,04776 | NA |
| 1,670175839 | 0,00388 | 1,572434584 | 0,00099 | NA |
| 1,725482689 | 0,04032 | 1,284315809 | 0,0257  | NA |
| 0,596254436 | 0,02478 | 0,698339266 | 0,00009 | NA |
| 2,797232165 | 0,00024 | 1,706452196 | 0,00149 | NA |
| 1,695839929 | 0,0255  | 1,264879542 | 0,02328 | NA |
| 0,828744904 | 0,01809 | 0,872967591 | 0,00386 | NA |
| 1,179356592 | 0,04664 | 1,209994089 | 0,00545 | NA |
| 1,390881972 | 0,00707 | 1,229438867 | 0,00043 | NA |
| 0,574747424 | 0,02903 | 0,662044455 | 0,00072 | NA |
| 0,70270935  | 0,02255 | 0,655196702 | 0,00002 | NA |
| 0,521955964 | 0,0154  | 0,537747195 | 0,00033 | NA |
| 0,759435845 | 0,04355 | 0,791137301 | 0,01188 | NA |
| 1,589970502 | 0,00099 | 1,462057448 | 0,00003 | NA |
| 0,576742803 | 0,00082 | 0,679714121 | 0,00004 | NA |
| 1,919858522 | 0,0002  | 1,465100875 | 0,00097 | NA |
| 0,570777354 | 0,0001  | 0,71548826  | 0,00055 | NA |
| 0,62981499  | 0,01258 | 0,681129017 | 0,00001 | NA |
| 2,584705661 | 0,00018 | 1,685293659 | 0,00004 | NA |
| 1,433955248 | 0,01934 | 1,236275261 | 0,00098 | NA |
| 1,235418637 | 0,02605 | 1,22603486  | 0,00013 | NA |
| 0,765778999 | 0,01269 | 0,743291492 | 0,00192 | NA |

|             |         |              |         |    |
|-------------|---------|--------------|---------|----|
| 1,723092319 | 0,00349 | 1,227735684  | 0,01779 | NA |
| 0,762072415 | 0,03847 | 0,735093668  | 0,00051 | NA |
| 0,594191553 | 0,02655 | 0,750019495  | 0,01562 | NA |
| 1,33885257  | 0,02563 | 1,185092771  | 0,007   | NA |
| 1,223488041 | 0,04815 | 1,284315809  | 0,00427 | NA |
| 1,373636233 | 0,00435 | 1,25353302   | 0,00109 | NA |
| 2,339175328 | 0,00003 | 1,378405153  | 0,01254 | NA |
| 0,814507563 | 0,0199  | 0,792784137  | 0,00381 | NA |
| 1,534746096 | 0,00039 | 1,179356592  | 0,01995 | NA |
| 1,345367209 | 0,00188 | 1,164733586  | 0,02878 | NA |
| 4,129594142 | 0,0002  | 2,018103268  | 0,00039 | NA |
| 0,605416542 | 0,00913 | 0,822450069  | 0,00881 | NA |
| 1,268391399 | 0,04235 | 1,277213759  | 0,00082 | NA |
| 0,735603373 | 0,0341  | 0,816203046  | 0,03853 | NA |
| 1,753211443 | 0,00172 | 1,207480591  | 0,0446  | NA |
| 1,343503426 | 0,02507 | 1,260503392  | 0,01205 | NA |
| 0,44534645  | 0,00072 | 0,520510799  | 0       | NA |
| 0,739693755 | 0,03782 | 0,806641759  | 0,02643 | NA |
| 0,485990494 | 0,02456 | 0,697855382  | 0,0004  | NA |
| 0,713012859 | 0,00414 | 0,716977624  | 0,00006 | NA |
| 0,730016005 | 0,01165 | 0,882702996  | 0,01596 | NA |
| 1,308578071 | 0,01287 | 1,155886707  | 0,03134 | NA |
| 1,404444876 | 0,00208 | 1,375541818  | 0,00022 | NA |
| 1,434949535 | 0,00086 | 1,192508872  | 0,03927 | NA |
| 0,700763725 | 0,03796 | 0,726986259  | 0,00046 | NA |
| 1,43893358  | 0,01012 | 1,21167266   | 0,01875 | NA |
| 1,45195828  | 0,03135 | 1,158292806  | 0,04219 | NA |
| 0,549808075 | 0,01849 | 0,595841287  | 0       | NA |
| 0,724973416 | 0,01814 | 0,788946841  | 0,00021 | NA |
| 0,616853585 | 0,01267 | 0,692074858  | 0,00599 | NA |
| 0,825877665 | 0,02406 | 0,70027816   | 0,00001 | NA |
| 1,209994089 | 0,0408  | 1,155085785  | 0,01173 | NA |
| 1,185914499 | 0,04644 | 1,129747215  | 0,00912 | NA |
| 1,192508872 | 0,03537 | 1,152686347  | 0,00228 | NA |
| 0,688247801 | 0,00167 | 0,793333843  | 0,02516 | NA |
| 1,281647924 | 0,01132 | 1,132883885  | 0,03761 | NA |
| 0,72597914  | 0,02764 | 0,716480825  | 0,00012 | NA |
| 1,221793102 | 0,0422  | 1,2388848698 | 0,00362 | NA |
| 0,661127303 | 0,00427 | 0,770037174  | 0,00071 | NA |
| 1,285206337 | 0,00322 | 1,195819797  | 0,02912 | NA |
| 1,325007017 | 0,01749 | 1,246601194  | 0,00532 | NA |
| 1,80125196  | 0,00627 | 1,529436278  | 0,00065 | NA |
| 0,750019495 | 0,00842 | 0,738157203  | 0,00291 | NA |
| 1,243149669 | 0,03762 | 1,209994089  | 0,00949 | NA |
| 0,755236293 | 0,01094 | 0,768970416  | 0,00469 | NA |
| 1,219255094 | 0,00917 | 1,128964405  | 0,01524 | NA |
| 0,759962428 | 0,01736 | 0,853817714  | 0,03015 | NA |
| 1,308578071 | 0,02007 | 1,353786279  | 0,0023  | NA |
| 1,267512522 | 0,00798 | 1,172834949  | 0,01933 | NA |
| 0,482968164 | 0,04903 | 0,446273486  | 0,00002 | NA |
| 2,820595921 | 0,00012 | 1,481439798  | 0,02092 | NA |
| 1,343503426 | 0,00169 | 1,136816973  | 0,0439  | NA |
| 2,056227653 | 0,00051 | 1,460032011  | 0,00005 | NA |
| 1,375541818 | 0,01196 | 1,129747215  | 0,02917 | NA |
| 1,270150983 | 0,02513 | 1,43097652   | 0,00023 | NA |
| 1,976571303 | 0,00033 | 1,257013375  | 0,00983 | NA |
| 1,834008086 | 0,00373 | 1,258757174  | 0,02811 | NA |
| 1,267512522 | 0,0365  | 1,174461971  | 0,01671 | NA |
| 1,368883813 | 0,00538 | 1,202469249  | 0,00521 | NA |
| 1,271031689 | 0,01516 | 1,156688184  | 0,01165 | NA |
| 1,261377409 | 0,03198 | 1,163926534  | 0,02157 | NA |
| 0,627635996 | 0,0003  | 0,729004689  | 0,00015 | NA |
| 1,424050196 | 0,01978 | 1,330529041  | 0,00008 | NA |
| 1,359428242 | 0,00079 | 1,142346247  | 0,02675 | NA |
| 1,350037985 | 0,04498 | 1,257013375  | 0,01336 | NA |
| 1,195819797 | 0,02888 | 1,115739322  | 0,01911 | NA |
| 0,692074858 | 0,00668 | 0,882091365  | 0,0232  | NA |
| 1,429984986 | 0,00108 | 1,167158102  | 0,00804 | NA |
| 0,372161314 | 0,00273 | 0,590496331  | 0,00001 | NA |
| 1,594384953 | 0,00374 | 1,248330549  | 0,00034 | NA |
| 1,583371732 | 0,02547 | 1,317679952  | 0,01949 | NA |
| 1,373636233 | 0,02039 | 1,295940965  | 0,0004  | NA |
| 0,647521499 | 0,03043 | 0,85027416   | 0,04754 | NA |
| 1,25962998  | 0,02405 | 1,173648178  | 0,00025 | NA |
| 1,578987773 | 0,01006 | 1,366987452  | 0,00057 | NA |
| 0,561749952 | 0,00952 | 0,793883931  | 0,01697 | NA |
| 0,487002134 | 0,00031 | 0,639492791  | 0,00002 | NA |
| 0,675955417 | 0,04732 | 0,800514811  | 0,01239 | NA |
| 0,807201075 | 0,02349 | 0,837406488  | 0,04208 | NA |
| 1,343503426 | 0,01322 | 1,202469249  | 0,0131  | NA |
| 1,30224419  | 0,02834 | 1,274560627  | 0,00118 | NA |
| 0,633756261 | 0,04859 | 0,60667678   | 0,00001 | NA |
| 0,559806444 | 0,02538 | 0,758383773  | 0,004   | NA |
| 0,675955417 | 0,01681 | 0,62981499   | 0,00003 | NA |
| 0,604997045 | 0,03632 | 0,618995145  | 0,00002 | NA |
| 0,538493188 | 0,00419 | 0,633756261  | 0,00027 | NA |
| 1,267512522 | 0,01259 | 1,163926534  | 0,01372 | NA |
| 1,266634254 | 0,02597 | 1,200803427  | 0,00159 | NA |
| 1,260503392 | 0,03733 | 1,136816973  | 0,03255 | NA |
| 1,383190629 | 0,00491 | 1,373636233  | 0,00002 | NA |
| 1,32317144  | 0,02553 | 1,170398641  | 0,00416 | NA |
| 1,449946833 | 0,00509 | 1,215036792  | 0,01995 | NA |
| 1,400556321 | 0,00205 | 1,229438867  | 0,00921 | NA |
| 1,341642225 | 0,00764 | 1,167967395  | 0,03389 | NA |
| 1,993080526 | 0,00027 | 1,433955248  | 0,00548 | NA |
| 1,43097652  | 0,00365 | 1,227735684  | 0,00056 | NA |
| 0,762072415 | 0,01875 | 0,874784765  | 0,04146 | NA |
| 1,199971382 | 0,03557 | 1,125058485  | 0,03488 | NA |

|             |         |             |         |            |                                                                                   |
|-------------|---------|-------------|---------|------------|-----------------------------------------------------------------------------------|
| 0,659296807 | 0,0153  | 0,709070018 | 0,00255 | NA         | NA                                                                                |
| 0,47237352  | 0,01469 | 0,640823962 | 0,00002 | NA         | NA                                                                                |
| 1,244011653 | 0,02188 | 1,185914499 | 0,00175 | NA         | NA                                                                                |
| 1,258757174 | 0,0168  | 1,268391399 | 0,00312 | NA         | NA                                                                                |
| 0,695440986 | 0,00472 | 0,853226098 | 0,03365 | NA         | NA                                                                                |
| 0,501735874 | 0,01136 | 0,668037039 | 0,00107 | NA         | NA                                                                                |
| 1,250062303 | 0,03156 | 1,282536603 | 0,00043 | NA         | NA                                                                                |
| 0,571173123 | 0,01383 | 0,408101523 | 0,00001 | NA         | NA                                                                                |
| 1,286989247 | 0,00594 | 1,196648963 | 0,03242 | NA         | NA                                                                                |
| 2,171963713 | 0,00172 | 1,480413298 | 0,01106 | NA         | NA                                                                                |
| 2,302178983 | 0,00003 | 1,972465409 | 0,00055 | NA         | NA                                                                                |
| 1,437936533 | 0,03881 | 1,25092908  | 0,00817 | NA         | NA                                                                                |
| 1,315854525 | 0,0053  | 1,114966219 | 0,02986 | NA         | NA                                                                                |
| 0,325561047 | 0,0014  | 0,343409058 | 0       | NA         | NA                                                                                |
| 1,360370852 | 0,03693 | 1,168777249 | 0,02871 | NA         | NA                                                                                |
| 0,763658749 | 0,00958 | 0,883315051 | 0,01105 | NA         | NA                                                                                |
| 1,666706414 | 0,00907 | 1,351910833 | 0,01359 | NA         | NA                                                                                |
| 2,327853069 | 0,00669 | 1,559409685 | 0,00843 | NA         | NA                                                                                |
| 0,740206649 | 0,02982 | 0,782411182 | 0,00029 | NA         | NA                                                                                |
| 1,29145735  | 0,01761 | 1,136029265 | 0,02463 | NA         | NA                                                                                |
| 0,290175979 | 0,00102 | 0,532923368 | 0,00001 | NA         | NA                                                                                |
| 1,486582984 | 0,00578 | 1,261377409 | 0,00125 | NA         | NA                                                                                |
| 1,208317843 | 0,04492 | 1,199139914 | 0,00732 | NA         | NA                                                                                |
| 1,584469622 | 0,00135 | 1,314031627 | 0,02012 | NA         | NA                                                                                |
| 1,286989247 | 0,04587 | 1,203303026 | 0,04292 | NA         | NA                                                                                |
| 0,712518807 | 0,00445 | 0,664803554 | 0,00018 | NA         | NA                                                                                |
| 0,815637493 | 0,04503 | 0,804966138 | 0,00795 | NA         | NA                                                                                |
| 0,649319301 | 0,01984 | 0,730016005 | 0,00019 | NA         | NA                                                                                |
| 0,668037039 | 0,03903 | 0,73153561  | 0,00432 | NA         | NA                                                                                |
| 1,279872414 | 0,01182 | 1,125058485 | 0,00631 | NA         | NA                                                                                |
| 1,234562607 | 0,04953 | 1,149494848 | 0,01051 | NA         | NA                                                                                |
| 1,29145735  | 0,01068 | 1,231144413 | 0,01626 | NA         | NA                                                                                |
| 0,540737382 | 0,00733 | 0,521594297 | 0       | NA         | NA                                                                                |
| 1,4063932   | 0,01283 | 1,242288282 | 0,02971 | NA         | NA                                                                                |
| 1,263127262 | 0,00666 | 1,242288282 | 0,0087  | NA         | NA                                                                                |
| 1,284315809 | 0,03616 | 1,100378609 | 0,04674 | NA         | NA                                                                                |
| 0,724471077 | 0,03409 | 0,785672517 | 0,01574 | NA         | NA                                                                                |
| 1,543280175 | 0,00633 | 1,277213759 | 0,00859 | NA         | NA                                                                                |
| 1,254402205 | 0,01261 | 1,143930973 | 0,0132  | NA         | NA                                                                                |
| 0,654289036 | 0,01003 | 0,66296288  | 0,00065 | NA         | NA                                                                                |
| 0,69399636  | 0,02068 | 0,746906729 | 0,00117 | NA         | NA                                                                                |
| 1,411275843 | 0,04538 | 1,338855257 | 0,00041 | NA         | NA                                                                                |
| 1,199971382 | 0,011   | 1,188383105 | 0,00223 | NA         | NA                                                                                |
| 1,43893358  | 0,01004 | 1,193335743 | 0,02314 | NA         | NA                                                                                |
| 0,710053679 | 0,00145 | 0,755759964 | 0,00001 | NA         | NA                                                                                |
| 0,695923196 | 0,00518 | 0,745872013 | 0,00046 | NAA15      | N(alpha)-acetyltransferase 15, NatA auxiliary subunit                             |
| 0,784584098 | 0,02822 | 0,819036698 | 0,01905 | NAA15      | N(alpha)-acetyltransferase 15, NatA auxiliary subunit                             |
| 0,637722196 | 0,00924 | 0,770037174 | 0,011   | NAA16      | N(alpha)-acetyltransferase 16, NatA auxiliary subunit                             |
| 0,762072415 | 0,02003 | 0,774855931 | 0,01135 | NAA20      | N(alpha)-acetyltransferase 20, NatB catalytic subunit                             |
| 0,757858283 | 0,04339 | 0,78024548  | 0,00044 | NAA25      | N(alpha)-acetyltransferase 25, NatB auxiliary subunit                             |
| 0,673616788 | 0,03221 | 0,764718139 | 0,00001 | NAA50      | N(alpha)-acetyltransferase 50, NatE catalytic subunit                             |
| 0,514413354 | 0,0425  | 0,61813763  | 0,03939 | NAB1       | NGFI-A binding protein 1 (EGR1 binding protein 1)                                 |
| 1,202469249 | 0,04144 | 1,120389214 | 0,04467 | NAB1       | NGFI-A binding protein 1 (EGR1 binding protein 1)                                 |
| 0,509445598 | 0,02949 | 0,845572287 | 0,00367 | NACA       | nascent polypeptide-associated complex alpha subunit                              |
| 0,5         | 0,03465 | 0,859756486 | 0,00661 | NACA       | nascent polypeptide-associated complex alpha subunit                              |
| 0,70319666  | 0,03532 | 0,81056512  | 0,00578 | NACA       | nascent polypeptide-associated complex alpha subunit                              |
| 0,615572207 | 0,01138 | 0,680185426 | 0,00002 | NAE1       | NEDD8 activating enzyme E1 subunit 1                                              |
| 1,390881972 | 0,01283 | 1,267512522 | 0,00003 | NAGA       | N-acetylgalactosaminidase, alpha-                                                 |
| 1,416175438 | 0,02697 | 1,362258035 | 0,00004 | NAGA       | N-acetylgalactosaminidase, alpha-                                                 |
| 1,303147149 | 0,01102 | 1,22010051  | 0,00889 | NANS       | N-acetylneuraminic acid synthase                                                  |
| 1,890804234 | 0,00288 | 1,656341323 | 0,00014 | NAPSB      | napsin B aspartic peptidase pseudogene                                            |
| 0,612168196 | 0,03822 | 0,701249625 | 0,0248  | NASP       | nuclear autoantigenic sperm protein (histone-binding)                             |
| 1,278099363 | 0,02518 | 1,21335356  | 0,0114  | NAT9       | N-acetyltransferase 9 (GCN5-related, putative)                                    |
| 1,500038989 | 0,0263  | 1,270150983 | 0,00102 | NAV2       | neuron navigator 2                                                                |
| 1,207480591 | 0,02152 | 1,192508872 | 0,00255 | NBPF4      | neuroblastoma breakpoint family, member 4                                         |
| 1,254402205 | 0,04605 | 1,142346247 | 0,04721 | NCAM1      | neural cell adhesion molecule 1                                                   |
| 0,746906729 | 0,00885 | 0,815072332 | 0,00263 | NCAPG      | non-SMC condensin I complex, subunit G                                            |
| 0,755759964 | 0,04296 | 0,837987135 | 0,01879 | NCAPG2     | non-SMC condensin II complex, subunit G2                                          |
| 1,927859615 | 0,01907 | 1,377450046 | 0,01668 | NCEH1      | neutral cholesterol ester hydrolase 1                                             |
| 2,115501927 | 0,00003 | 1,650610817 | 0,00001 | NCF1C      | neutrophil cytosolic factor 1C pseudogene                                         |
| 1,889494082 | 0,00046 | 1,536875181 | 0,00018 | NCF2       | neutrophil cytosolic factor 2                                                     |
| 2,368543224 | 0,0002  | 2,074839873 | 0       | NCF4       | neutrophil cytosolic factor 4, 40kDa                                              |
| 2,262628926 | 0,00844 | 2,25792881  | 0       | NCF4       | neutrophil cytosolic factor 4, 40kDa                                              |
| 0,723467443 | 0,01451 | 0,840896415 | 0,02492 | NCK2       | NCK adaptor protein 2                                                             |
| 1,729074463 | 0,00394 | 1,767855062 | 0       | NCKAP1L    | NCK-associated protein 1-like                                                     |
| 0,76950361  | 0,02356 | 0,872362706 | 0,004   | NCL        | nucleolin                                                                         |
| 0,686342216 | 0,02308 | 0,7944344   | 0,00207 | NCOA4      | nuclear receptor coactivator 4                                                    |
| 0,668500248 | 0,00705 | 0,838568184 | 0,00069 | NCOA6      | nuclear receptor coactivator 6                                                    |
| 0,69399636  | 0,00955 | 0,829319546 | 0,0059  | NCRNA00185 | non-protein coding RNA 185                                                        |
| 0,74949801  | 0,01701 | 0,767373048 | 0,00004 | NDE1       | nudE nuclear distribution gene E homolog 1 (A. nidulans)                          |
| 0,584793832 | 0,00029 | 0,71400199  | 0,00027 | NDEL1      | nudE nuclear distribution gene E homolog (A. nidulans)-like 1                     |
| 1,341642225 | 0,01087 | 1,150291893 | 0,01979 | NDN        | neclidin homolog (mouse)                                                          |
| 0,590496331 | 0,00204 | 0,709561678 | 0,00797 | NDRG4      | NDRG family member 4                                                              |
| 0,76684133  | 0,00916 | 0,854409741 | 0,00488 | NDUFA12    | NADH dehydrogenase (ubiquinone) 1 alpha subcomplex, 12                            |
| 0,77916458  | 0,00529 | 0,849096246 | 0,02502 | NDUFA6     | NADH dehydrogenase (ubiquinone) 1 alpha subcomplex, 6, 14kDa                      |
| 0,842062954 | 0,03673 | 0,754712984 | 0,00008 | NDUFAF2    | NADH dehydrogenase (ubiquinone) 1 alpha subcomplex, assembly factor 2             |
| 0,753145233 | 0,01936 | 0,777007269 | 0,00047 | NDUFAF4    | NADH dehydrogenase (ubiquinone) 1 alpha subcomplex, assembly factor 4             |
| 0,726986259 | 0,01545 | 0,849096246 | 0,02502 | NDUFB3     | NADH dehydrogenase (ubiquinone) 1 beta subcomplex, 3, 12kDa                       |
| 0,668963777 | 0,04012 | 0,820741609 | 0,00725 | NDUFB4     | NADH dehydrogenase (ubiquinone) 1 beta subcomplex, 4, 15kDa                       |
| 0,695923196 | 0,00801 | 0,791685866 | 0,00114 | NDUFC1     | NADH dehydrogenase (ubiquinone) 1, subcomplex unknown, 1, 6kDa                    |
| 0,689680461 | 0,03864 | 0,819036698 | 0,00142 | NDUFS4     | NADH dehydrogenase (ubiquinone) Fe-S protein 4, 18kDa (NADH-coenzyme Q reductase) |
| 0,780786493 | 0,04591 | 0,85086373  | 0,00685 | NDUFS6     | NADH dehydrogenase (ubiquinone) Fe-S protein 6, 13kDa (NADH-coenzyme Q reductase) |
| 0,720964436 | 0,04948 | 0,856188285 | 0,02279 | NDUFV2     | NADH dehydrogenase (ubiquinone) flavoprotein 2, 24kDa                             |
| 0,763658749 | 0,04326 | 0,807760778 | 0,00027 | NDUFV3     | NADH dehydrogenase (ubiquinone) flavoprotein 3, 10kDa                             |
| 0,385820044 | 0,00156 | 0,528875482 | 0       | NEBL       | nebulette                                                                         |
| 0,401090583 | 0,00029 | 0,555554364 | 0,00007 | NEBL       | nebulette                                                                         |
| 0,642603169 | 0,01916 | 0,754712984 | 0,00665 | NEBL       | nebulette                                                                         |
| 1,264879542 | 0,02761 | 1,186736798 | 0,00771 | NEDD9      | neural precursor cell expressed, developmentally down-regulated 9                 |

|             |         |             |         |          |                                                                                          |
|-------------|---------|-------------|---------|----------|------------------------------------------------------------------------------------------|
| 1,943961976 | 0,01514 | 1,45296505  | 0,01186 | NEDD9    | neural precursor cell expressed, developmentally down-regulated 9                        |
| 1,543280175 | 0,00544 | 1,446934886 | 0,00311 | NEDD9    | neural precursor cell expressed, developmentally down-regulated 9                        |
| 0,735093668 | 0,00596 | 0,660669203 | 0,00063 | NEFL     | neurofilament, light polypeptide                                                         |
| 0,242658617 | 0,0001  | 0,337509496 | 0,00002 | NEFL     | neurofilament, light polypeptide                                                         |
| 0,308640652 | 0,00018 | 0,476318999 | 0,00001 | NEFL     | neurofilament, light polypeptide                                                         |
| 0,299162241 | 0,00002 | 0,475659138 | 0,00003 | NEFM     | neurofilament, medium polypeptide                                                        |
| 1,313121125 | 0,01648 | 1,289668251 | 0,00085 | NEIL1    | nei endonuclease VIII-like 1 (E. coli)                                                   |
| 0,763129604 | 0,03667 | 0,790041312 | 0,00104 | NEK1     | NIMA (never in mitosis gene a)-related kinase 1                                          |
| 1,262252032 | 0,04426 | 1,270150983 | 0,00074 | NEK6     | NIMA (never in mitosis gene a)-related kinase 6                                          |
| 1,230291345 | 0,02065 | 1,225185332 | 0,01477 | NELL1    | NEL-like 1 (chicken)                                                                     |
| 0,588453369 | 0,02405 | 0,757858283 | 0,00065 | NET1     | neuroepithelial cell transforming 1                                                      |
| 1,265756594 | 0,03019 | 1,202469249 | 0,00228 | NEUROD6  | neurogenic differentiation 6                                                             |
| 1,267512522 | 0,01799 | 1,195819797 | 0,03516 | NF1      | neurofibromin 1                                                                          |
| 1,22858698  | 0,02589 | 1,192508872 | 0,01808 | NFAM1    | NFAT activating protein with ITAM motif 1                                                |
| 1,31494276  | 0,00382 | 1,240567298 | 0,00058 | NFAM1    | NFAT activating protein with ITAM motif 1                                                |
| 0,61813763  | 0,013   | 0,831045862 | 0,04786 | NFAT5    | nuclear factor of activated T-cells 5, tonicity-responsive                               |
| 0,76154437  | 0,03185 | 0,824162085 | 0,01072 | NFATC3   | nuclear factor of activated T-cells, cytoplasmic, calcineurin-dependent 3                |
| 1,423063461 | 0,0238  | 1,264003098 | 0,00699 | NFE2     | nuclear factor (erythroid-derived 2), 45kDa                                              |
| 0,517991382 | 0,00896 | 0,71449707  | 0,00022 | NFE2L2   | nuclear factor (erythroid-derived 2)-like 2                                              |
| 0,581157054 | 0,00481 | 0,672683604 | 0,00059 | NFE2L2   | nuclear factor (erythroid-derived 2)-like 2                                              |
| 0,598324482 | 0,02465 | 0,76154437  | 0,01125 | NFIC     | nuclear factor I/C (CCAAT-binding transcription factor)                                  |
| 0,651122095 | 0,00186 | 0,788946841 | 0,00176 | NFIX     | nuclear factor I/X (CCAAT-binding transcription factor)                                  |
| 0,55632506  | 0,01178 | 0,681129017 | 0,01984 | NFIX     | nuclear factor I/X (CCAAT-binding transcription factor)                                  |
| 1,437936533 | 0,00096 | 1,260503392 | 0,00089 | NFKBIE   | nuclear factor of kappa light polypeptide gene enhancer in B-cells inhibitor, epsilon    |
| 0,612592666 | 0,00407 | 0,721964598 | 0,00001 | NFX1     | nuclear transcription factor, X-box binding 1                                            |
| 0,679243142 | 0,03172 | 0,818469182 | 0,00057 | NGDN     | neuroguidin, EIF4E binding protein                                                       |
| 0,545631939 | 0,0002  | 0,596254436 | 0       | NGEF     | neuronal guanine nucleotide exchange factor                                              |
| 1,298638603 | 0,02882 | 1,28877463  | 0,01379 | NHLRC3   | NHL repeat containing 3                                                                  |
| 1,240567298 | 0,02743 | 1,169587664 | 0,01676 | NHLRC4   | NHL repeat containing 4                                                                  |
| 0,756808396 | 0,03658 | 0,877821798 | 0,0178  | NHP2     | NHP2 ribonucleoprotein homolog (yeast)                                                   |
| 0,461051559 | 0,00943 | 0,537374586 | 0       | NHSL1    | NHS-like 1                                                                               |
| 0,529976392 | 0,04652 | 0,719965659 | 0,02148 | NHSL1    | NHS-like 1                                                                               |
| 0,711531731 | 0,00126 | 0,747942879 | 0,00303 | NHSL1    | NHS-like 1                                                                               |
| 1,778917987 | 0,0017  | 1,583371732 | 0,00179 | NID1     | nidogen 1                                                                                |
| 1,401527449 | 0,04    | 1,275444392 | 0,03437 | NINL     | ninein-like                                                                              |
| 0,492092011 | 0,00891 | 0,577142709 | 0,00004 | NIPAL1   | NIPA-like domain containing 1                                                            |
| 0,584388624 | 0,02213 | 0,702222438 | 0,00011 | NIPAL2   | NIPA-like domain containing 2                                                            |
| 0,540362701 | 0,00169 | 0,721964598 | 0,00026 | NIPAL4   | NIPA-like domain containing 4                                                            |
| 0,639936207 | 0,00365 | 0,762072415 | 0,00244 | NIPBL    | Nipped-B homolog (Drosophila)                                                            |
| 0,695923196 | 0,02691 | 0,78132788  | 0,00256 | NIPBL    | Nipped-B homolog (Drosophila)                                                            |
| 0,532554102 | 0,0238  | 0,564873607 | 0,00008 | NIPBL    | Nipped-B homolog (Drosophila)                                                            |
| 0,584388624 | 0,00039 | 0,816768991 | 0,0012  | NIT2     | nitrilase family, member 2                                                               |
| 1,658639092 | 0,00506 | 1,360370852 | 0,00481 | NKG7     | natural killer cell group 7 sequence                                                     |
| 1,781385801 | 0,01216 | 1,425037614 | 0,0361  | NLR3     | NLR family, CARD domain containing 3                                                     |
| 1,31494276  | 0,00988 | 1,258757174 | 0,00048 | NLRP11   | NLR family, pyrin domain containing 11                                                   |
| 1,264003098 | 0,04068 | 1,159899655 | 0,0299  | NLRP7    | NLR family, pyrin domain containing 7                                                    |
| 0,729510172 | 0,00829 | 0,879649076 | 0,02102 | NLRX1    | NLR family member X1                                                                     |
| 1,520978753 | 0,00935 | 1,368883813 | 0,00351 | NME4     | non-metastatic cells 4, protein expressed in                                             |
| 0,662503509 | 0,00739 | 0,790589117 | 0,00711 | NME7     | non-metastatic cells 7, protein expressed in (nucleoside-diphosphate kinase)             |
| 1,208317843 | 0,03571 | 1,126619228 | 0,03488 | NMNAT2   | nicotinamide nucleotide adenyltransferase 2                                              |
| 1,673652485 | 0,00064 | 1,486582984 | 0,00005 | NMNAT2   | nicotinamide nucleotide adenyltransferase 2                                              |
| 0,535515412 | 0,00042 | 0,740206649 | 0,00036 | NMU      | neuromedin U                                                                             |
| 1,625631204 | 0,01918 | 1,464085696 | 0,00687 | NNMT     | nicotinamide N-methyltransferase                                                         |
| 0,650670928 | 0,02238 | 0,709561678 | 0,00002 | NOD2     | nucleotide-binding oligomerization domain containing 2                                   |
| 0,773782497 | 0,03715 | 0,868742185 | 0,03508 | NOL10    | nucleolar protein 10                                                                     |
| 0,724471077 | 0,0036  | 0,846745312 | 0,02205 | NOL3     | nucleolar protein 3 (apoptosis repressor with CARD domain)                               |
| 0,671751713 | 0,00065 | 0,848507902 | 0,01174 | NOL3     | nucleolar protein 3 (apoptosis repressor with CARD domain)                               |
| 0,847332435 | 0,04878 | 0,849684999 | 0,04153 | NOL9     | nucleolar protein 9                                                                      |
| 0,705637922 | 0,02191 | 0,804966138 | 0,0001  | NOLC1    | nucleolar and coiled-body phosphoprotein 1                                               |
| 0,61301743  | 0,02319 | 0,770571108 | 0,00325 | NOP16    | NOP16 nucleolar protein homolog (yeast)                                                  |
| 0,7031966   | 0,02664 | 0,837987135 | 0,03359 | NOP16    | NOP16 nucleolar protein homolog (yeast)                                                  |
| 0,594191553 | 0,03282 | 0,81056512  | 0,00313 | NOP56    | NOP56 ribonucleoprotein homolog (yeast)                                                  |
| 0,579949827 | 0,00315 | 0,735603373 | 0,00934 | NOS1     | nitric oxide synthase 1 (neuronal)                                                       |
| 0,419865746 | 0,0022  | 0,632001549 | 0,01183 | NOS1     | nitric oxide synthase 1 (neuronal)                                                       |
| 0,667111585 | 0,01993 | 0,806641759 | 0,00031 | NOTCH2   | notch 2                                                                                  |
| 0,678302164 | 0,01725 | 0,759435845 | 0,00006 | NOTCH2   | notch 2                                                                                  |
| 0,581157054 | 0,00173 | 0,79940583  | 0,00439 | NOTCH2NL | notch 2 N-terminal like                                                                  |
| 1,368883813 | 0,04368 | 1,362258035 | 0,00728 | NOTCH4   | notch 4                                                                                  |
| 1,249196126 | 0,00756 | 1,159095952 | 0,00108 | NPCDR1   | nasopharyngeal carcinoma, down-regulated 1                                               |
| 0,538493188 | 0,00177 | 0,742261785 | 0,00423 | NPIPL3   | nuclear pore complex interacting protein-like 3                                          |
| 0,78132788  | 0,04914 | 0,858565436 | 0,00361 | NPM1     | nucleophosmin (nucleolar phosphoprotein B23, numatrin)                                   |
| 0,555939579 | 0,02551 | 0,817902059 | 0,02248 | NPM1     | nucleophosmin (nucleolar phosphoprotein B23, numatrin)                                   |
| 0,37138823  | 0,00154 | 0,429580377 | 0,00002 | NPR3     | natriuretic peptide receptor C/guanylate cyclase C (atrionatriuretic peptide receptor C) |
| 1,267512522 | 0,01389 | 1,118061851 | 0,04901 | NPRL2    | nitrogen permease regulator-like 2 (S. cerevisiae)                                       |
| 1,251796459 | 0,04618 | 1,209994089 | 0,00467 | NPY6R    | neuropeptide Y receptor Y6 (pseudogene)                                                  |
| 0,570381858 | 0,00045 | 0,741747467 | 0,012   | NQO1     | NAD(P)H dehydrogenase, quinone 1                                                         |
| 1,639209215 | 0,00881 | 1,31494276  | 0,02649 | NR2F2    | nuclear receptor subfamily 2, group F, member 2                                          |
| 0,776468875 | 0,02997 | 0,831622098 | 0,01015 | NR2F6    | nuclear receptor subfamily 2, group F, member 6                                          |
| 1,511519928 | 0,01783 | 1,42800398  | 0,0277  | NR4A1    | nuclear receptor subfamily 4, group A, member 1                                          |
| 1,297738767 | 0,02684 | 1,353786279 | 0,00806 | NR4A1    | nuclear receptor subfamily 4, group A, member 1                                          |
| 1,273677475 | 0,0414  | 1,359428242 | 0,00001 | NR5A2    | nuclear receptor subfamily 5, group A, member 2                                          |
| 0,853817714 | 0,04601 | 0,87175824  | 0,02692 | NRF1     | nuclear respiratory factor 1                                                             |
| 1,416175438 | 0,01067 | 1,543280175 | 0,00185 | NRGN     | neurogranin (protein kinase C substrate, RC3)                                            |
| 1,307671349 | 0,03725 | 1,247465572 | 0,00202 | NRIP3    | nuclear receptor interacting protein 3                                                   |
| 1,362258035 | 0,00266 | 1,296839555 | 0,03038 | NRN1     | neuritin 1                                                                               |
| 1,266634254 | 0,04465 | 1,294145654 | 0,00532 | NRP1     | neuropilin 1                                                                             |
| 1,243149669 | 0,00871 | 1,192508872 | 0,0055  | NRP2     | neuropilin 2                                                                             |
| 0,721464343 | 0,01338 | 0,666649339 | 0,0003  | NRTN     | neurturin                                                                                |
| 0,718968266 | 0,02221 | 0,77271055  | 0,00003 | NSA2     | NSA2 ribosome biogenesis homolog (S. cerevisiae)                                         |
| 0,556710809 | 0,00668 | 0,732550437 | 0,0004  | NSDHL    | NAD(P) dependent steroid dehydrogenase-like                                              |
| 0,707106781 | 0,01    | 0,713507253 | 0,00019 | NSDHL    | NAD(P) dependent steroid dehydrogenase-like                                              |
| 0,721964598 | 0,02182 | 0,571569168 | 0,00392 | NSF      | N-ethylmaleimide-sensitive factor                                                        |
| 0,708578698 | 0,04879 | 0,763658749 | 0,00036 | NSRP1    | nuclear speckle splicing regulatory protein 1                                            |
| 0,671751713 | 0,03399 | 0,752623374 | 0,00005 | NSUN2    | NOP2/Sun domain family, member 2                                                         |
| 0,663882579 | 0,04021 | 0,77271055  | 0,02379 | NT5C3    | 5'-nucleotidase, cytosolic III                                                           |
| 0,69640574  | 0,00045 | 0,784584098 | 0,00003 | NTPCR    | nucleoside-triphosphatase, cancer-related                                                |
| 1,242288282 | 0,03148 | 1,199971382 | 0,03764 | NTRK3    | neurotrophic tyrosine kinase, receptor, type 3                                           |
| 1,289668251 | 0,00899 | 1,257884972 | 0,00108 | NTRK3    | neurotrophic tyrosine kinase, receptor, type 3                                           |

|             |         |             |         |          |                                                                                                                          |
|-------------|---------|-------------|---------|----------|--------------------------------------------------------------------------------------------------------------------------|
| 1,413233644 | 0,03066 | 1,276328769 | 0,02238 | NUAK1    | NUAK family, SNF1-like kinase, 1                                                                                         |
| 0,744322628 | 0,0137  | 0,752101876 | 0,00558 | NUBPL    | nucleotide binding protein-like                                                                                          |
| 0,666649339 | 0,01816 | 0,686818117 | 0,00032 | NUDCD2   | NudC domain containing 2                                                                                                 |
| 0,748980467 | 0,0027  | 0,862741345 | 0,00468 | NUDT12   | nudix (nucleoside diphosphate linked moiety X)-type motif 12                                                             |
| 1,192508872 | 0,03176 | 1,2397077   | 0,00146 | NUDT14   | nudix (nucleoside diphosphate linked moiety X)-type motif 14                                                             |
| 0,644387315 | 0,0138  | 0,615999037 | 0       | NUDT15   | nudix (nucleoside diphosphate linked moiety X)-type motif 15                                                             |
| 1,587767862 | 0,00507 | 1,437936533 | 0,00063 | NUP210   | nucleoporin 210kDa                                                                                                       |
| 1,723092319 | 0,00023 | 1,554014538 | 0,00002 | NUP210   | nucleoporin 210kDa                                                                                                       |
| 1,980685744 | 0,00839 | 1,504203751 | 0,0001  | NUP210   | nucleoporin 210kDa                                                                                                       |
| 0,621144141 | 0,03346 | 0,707106781 | 0,00146 | NUP35    | nucleoporin 35kDa                                                                                                        |
| 0,597081594 | 0,00711 | 0,758383773 | 0       | NUP88    | nucleoporin 88kDa                                                                                                        |
| 1,311302014 | 0,01594 | 1,17609125  | 0,0188  | NUP88    | nucleoporin 88kDa                                                                                                        |
| 0,51015233  | 0,00081 | 0,81056512  | 0,02934 | NUPR1    | nuclear protein, transcriptional regulator, 1                                                                            |
| 0,672683604 | 0,0481  | 0,877821798 | 0,02797 | NUSAP1   | nucleolar and spindle associated protein 1                                                                               |
| 1,271031689 | 0,00814 | 1,157490217 | 0,00495 | NXPH3    | neurexophilin 3                                                                                                          |
| 0,677832163 | 0,03682 | 0,758909626 | 0,01108 | OAS1     | 2'-5'-oligoadenylate synthetase 1, 40/46kDa                                                                              |
| 0,669427628 | 0,00434 | 0,738157203 | 0,00216 | OAT      | ornithine aminotransferase                                                                                               |
| 1,261377409 | 0,00625 | 1,155886707 | 0,01616 | OCEL1    | occludin/ELL domain containing 1                                                                                         |
| 0,424253951 | 0,00001 | 0,530343871 | 0,00183 | OCLN     | occludin                                                                                                                 |
| 0,571569168 | 0,02828 | 0,624165274 | 0       | ODZ2     | odz, odd Oz/ten-m homolog 2 (Drosophila)                                                                                 |
| 0,612168196 | 0,00019 | 0,835666959 | 0,02991 | ODZ4     | odz, odd Oz/ten-m homolog 4 (Drosophila)                                                                                 |
| 0,648419777 | 0,00135 | 0,721964598 | 0,01088 | OGFOD1   | 2-oxoglutarate and iron-dependent oxygenase domain containing 1                                                          |
| 0,750019495 | 0,04611 | 0,69495911  | 0,00635 | OGFRL1   | opioid growth factor receptor-like 1                                                                                     |
| 1,183451022 | 0,02712 | 1,22858698  | 0,00087 | OGT      | O-linked N-acetylglucosamine (GlcNAc) transferase (UDP-N-acetylglucosamine:polypeptide-N-acetylglucosaminyl transferase) |
| 1,308578071 | 0,01086 | 1,205807828 | 0,00543 | OIT3     | oncoprotein induced transcript 3                                                                                         |
| 1,305859787 | 0,02033 | 1,481439798 | 0,00242 | OLFM1    | olfactomedin 1                                                                                                           |
| 1,684125907 | 0,00013 | 1,546492675 | 0,00201 | OLFM1    | olfactomedin 1                                                                                                           |
| 1,176906737 | 0,04579 | 1,191682575 | 0,02108 | OLFML2A  | olfactomedin-like 2A                                                                                                     |
| 1,643760375 | 0,01934 | 1,692317193 | 0,00181 | OLFML2B  | olfactomedin-like 2B                                                                                                     |
| 1,224336392 | 0,03599 | 1,16634937  | 0,0261  | OPTC     | opticin                                                                                                                  |
| 1,256142381 | 0,02347 | 1,232852325 | 0,00262 | OR1C1    | olfactory receptor, family 1, subfamily C, member 1                                                                      |
| 0,804966138 | 0,02782 | 0,868140228 | 0,02977 | OR1F2P   | olfactory receptor, family 1, subfamily F, member 2                                                                      |
| 1,191682575 | 0,01707 | 1,183451022 | 0,03262 | OR2H1    | olfactory receptor, family 2, subfamily H, member 1                                                                      |
| 1,31494276  | 0,03192 | 1,200803427 | 0,02387 | OR5E1    | olfactory receptor, family 5, subfamily E, member 1                                                                      |
| 1,277213759 | 0,04527 | 1,283425898 | 0,00209 | OR5P3    | olfactory receptor, family 5, subfamily P, member 3                                                                      |
| 1,242288282 | 0,04808 | 1,29056249  | 0,00036 | OR7E104P | olfactory receptor, family 7, subfamily E, member 104 pseudogene                                                         |
| 1,769080871 | 0,003   | 1,385109468 | 0,00339 | Orai2    | Orai calcium release-activated calcium modulator 2                                                                       |
| 1,69466487  | 0,00798 | 1,596596773 | 0,00131 | Orai2    | Orai calcium release-activated calcium modulator 2                                                                       |
| 1,769080871 | 0,00555 | 1,557249382 | 0,00027 | Orai2    | Orai calcium release-activated calcium modulator 2                                                                       |
| 1,299539062 | 0,00161 | 1,295940965 | 0,00432 | Orai3    | Orai calcium release-activated calcium modulator 3                                                                       |
| 0,647072827 | 0,0163  | 0,70270935  | 0,00044 | ORC5     | origin recognition complex, subunit 5                                                                                    |
| 0,53998828  | 0,00044 | 0,703684188 | 0,00071 | OSBP1A   | oxysterol binding protein-like 1A                                                                                        |
| 0,457232545 | 0,01618 | 0,631563631 | 0,00016 | OSBP1A   | oxysterol binding protein-like 1A                                                                                        |
| 0,484980955 | 0,01258 | 0,745355193 | 0,00004 | OSBP2    | oxysterol binding protein-like 2                                                                                         |
| 0,35998283  | 0,00007 | 0,57236208  | 0       | OSBP6    | oxysterol binding protein-like 6                                                                                         |
| 0,686818117 | 0,04021 | 0,668500248 | 0,00011 | OSBP6    | oxysterol binding protein-like 6                                                                                         |
| 0,60583633  | 0,00304 | 0,659296807 | 0,00001 | OSBP6    | oxysterol binding protein-like 6                                                                                         |
| 1,425037614 | 0,00261 | 1,393777239 | 0,00022 | OSBP7    | oxysterol binding protein-like 7                                                                                         |
| 1,558329159 | 0,00293 | 1,478362431 | 0,0002  | OSGIN1   | oxidative stress induced growth inhibitor 1                                                                              |
| 1,59549048  | 0,00309 | 1,325007017 | 0,01009 | OSM      | oncostatin M                                                                                                             |
| 0,70270935  | 0,00606 | 0,802181166 | 0,00778 | OTUB2    | OTU domain, ubiquitin aldehyde binding 2                                                                                 |
| 0,697371833 | 0,01612 | 0,869947353 | 0,02238 | OTUB2    | OTU domain, ubiquitin aldehyde binding 2                                                                                 |
| 0,628942486 | 0,00432 | 0,770571108 | 0,00393 | OVOL1    | ovo-like 1(Drosophila)                                                                                                   |
| 0,559418551 | 0,00004 | 0,702222438 | 0,00012 | OVOL1    | ovo-like 1(Drosophila)                                                                                                   |
| 0,581157054 | 0,0037  | 0,668037039 | 0,00012 | OXCT1    | 3-oxoacid CoA transferase 1                                                                                              |
| 0,646624466 | 0,02232 | 0,740719899 | 0,00449 | OXSRI    | oxidative-stress responsive 1                                                                                            |
| 1,264879542 | 0,03843 | 1,426025717 | 0,00003 | P2RX1    | purinergic receptor P2X, ligand-gated ion channel, 1                                                                     |
| 1,626758396 | 0,01118 | 1,622254311 | 0       | P2RX4    | purinergic receptor P2X, ligand-gated ion channel, 4                                                                     |
| 2,453769955 | 0       | 1,776453592 | 0,00002 | P2RX5    | purinergic receptor P2X, ligand-gated ion channel, 5                                                                     |
| 1,427014506 | 0,00005 | 1,326845141 | 0,00069 | P2RY10   | purinergic receptor P2Y, G-protein coupled, 10                                                                           |
| 1,568080908 | 0,00418 | 1,400556321 | 0,00554 | P2RY13   | purinergic receptor P2Y, G-protein coupled, 13                                                                           |
| 1,321338406 | 0,02963 | 1,344434994 | 0,00004 | P2RY6    | pyrimidinergic receptor P2Y, G-protein coupled, 6                                                                        |
| 2,969047141 | 0,00001 | 2,086377187 | 0,00001 | P2RY8    | purinergic receptor P2Y, G-protein coupled, 8                                                                            |
| 1,319507911 | 0,03264 | 1,22010051  | 0,04959 | P4HA3    | prolyl 4-hydroxylase, alpha polypeptide III                                                                              |
| 0,66296288  | 0,04145 | 0,747942879 | 0,00107 | PA2G4    | proliferation-associated 2G4, 38kDa                                                                                      |
| 0,796088099 | 0,01678 | 0,812252396 | 0,01739 | PACRGL   | PARK2 co-regulated-like                                                                                                  |
| 1,364147835 | 0,01904 | 1,317679952 | 0,00719 | PADI1    | peptidyl arginine deiminase, type I                                                                                      |
| 1,341642225 | 0,02236 | 1,399585866 | 0,00009 | PADI2    | peptidyl arginine deiminase, type II                                                                                     |
| 1,336074078 | 0,03137 | 1,32592576  | 0,00444 | PADI3    | peptidyl arginine deiminase, type III                                                                                    |
| 0,536630143 | 0,00381 | 0,801069878 | 0,01882 | PAFAH1B1 | platelet-activating factor acetylhydrolase 1b, regulatory subunit 1 (45kDa)                                              |
| 0,613442489 | 0,00672 | 0,764718139 | 0,00005 | PAFAH1B1 | platelet-activating factor acetylhydrolase 1b, regulatory subunit 1 (45kDa)                                              |
| 2,076278541 | 0,00231 | 1,604362333 | 0,00038 | PAG1     | phosphoprotein associated with glycosphingolipid microdomains 1                                                          |
| 0,477972659 | 0,00936 | 0,750019495 | 0,00335 | PAICS    | phosphoribosylaminoimidazole carboxylase, phosphoribosylaminoimidazole succinocarboxamide synthetase                     |
| 0,693034943 | 0,02426 | 0,706127202 | 0,00092 | PAK1IP1  | PAK1 interacting protein 1                                                                                               |
| 1,337927555 | 0,00742 | 1,29056249  | 0,00343 | PAK3     | p21 protein (Cdc42/Rac)-activated kinase 3                                                                               |
| 0,655196702 | 0,03565 | 0,71400199  | 0,00005 | PAK6     | p21 protein (Cdc42/Rac)-activated kinase 6                                                                               |
| 0,518709968 | 0,01582 | 0,699308041 | 0,00153 | PAK6     | p21 protein (Cdc42/Rac)-activated kinase 6                                                                               |
| 0,742261785 | 0,02198 | 0,85027416  | 0,02034 | PALB2    | partner and localizer of BRCA2                                                                                           |
| 0,668037039 | 0,03973 | 0,746389192 | 0,01273 | PALLD    | palladin, cytoskeletal associated protein                                                                                |
| 0,581560021 | 0,00428 | 0,644834125 | 0,0001  | PALMD    | palmelphin                                                                                                               |
| 0,475000191 | 0,01623 | 0,638164384 | 0,00405 | PALMD    | palmelphin                                                                                                               |
| 0,642157904 | 0,00508 | 0,632878297 | 0       | PANK3    | pantothenate kinase 3                                                                                                    |
| 0,604997045 | 0,03695 | 0,666649339 | 0,00008 | PANK3    | pantothenate kinase 3                                                                                                    |
| 0,66296288  | 0,00314 | 0,748980467 | 0,01075 | PANX1    | pannexin 1                                                                                                               |
| 0,527776859 | 0,00113 | 0,724471077 | 0,00272 | PAPLN    | papilin, proteoglycan-like sulfated glycoprotein                                                                         |
| 0,748980467 | 0,01349 | 0,736623843 | 0,00336 | PAPOLA   | poly(A) polymerase alpha                                                                                                 |
| 1,602139755 | 0,0286  | 1,277213759 | 0,02793 | PAPSS2   | 3'-phosphoadenosine 5'-phosphosulfate synthase 2                                                                         |
| 1,271913007 | 0,01263 | 1,202469249 | 0,00872 | PAPSS2   | 3'-phosphoadenosine 5'-phosphosulfate synthase 2                                                                         |
| 0,685866644 | 0,00057 | 0,693731833 | 0,00027 | PAQR5    | progesterin and adipoQ receptor family member V                                                                          |
| 0,435275282 | 0,01553 | 0,493800431 | 0       | PAQR5    | progesterin and adipoQ receptor family member V                                                                          |
| 0,655196702 | 0,02086 | 0,838568184 | 0,01116 | PARD3    | par-3 partitioning defective 3 homolog (C. elegans)                                                                      |
| 0,645728675 | 0,04165 | 0,87417862  | 0,01668 | PARD3    | par-3 partitioning defective 3 homolog (C. elegans)                                                                      |
| 0,577142709 | 0,00074 | 0,780786493 | 0,00073 | PARD3    | par-3 partitioning defective 3 homolog (C. elegans)                                                                      |
| 0,603740296 | 0,00025 | 0,652025368 | 0,00004 | PARD6G   | par-6 partitioning defective 6 homolog gamma (C. elegans)                                                                |
| 0,602068691 | 0,00891 | 0,650670928 | 0,00013 | PARD6G   | par-6 partitioning defective 6 homolog gamma (C. elegans)                                                                |
| 1,760518027 | 0,00007 | 1,526259209 | 0,00013 | PARM1    | prostate androgen-regulated mucin-like protein 1                                                                         |
| 2,408274762 | 0,00025 | 1,831467373 | 0,00012 | PARM1    | prostate androgen-regulated mucin-like protein 1                                                                         |
| 1,725482689 | 0,00169 | 1,378405153 | 0,01231 | PARVB    | parvin, beta                                                                                                             |

|             |         |             |         |         |                                                                                                              |
|-------------|---------|-------------|---------|---------|--------------------------------------------------------------------------------------------------------------|
| 1,624504793 | 0,0085  | 1,555092072 | 0,00019 | PARVB   | parvin, beta                                                                                                 |
| 1,398616083 | 0,00864 | 1,395710764 | 0,00436 | PARVG   | parvin, gamma                                                                                                |
| 1,353786279 | 0,01148 | 1,267512522 | 0,00044 | PARVG   | parvin, gamma                                                                                                |
| 1,392811481 | 0,01162 | 1,255271991 | 0,01028 | PASK    | PAS domain containing serine/threonine kinase                                                                |
| 0,547146851 | 0,04226 | 0,773782497 | 0,01153 | PAWR    | PRKC, apoptosis, WT1, regulator                                                                              |
| 0,718470088 | 0,02549 | 0,687294348 | 0,00088 | PAXIP1  | PAX interacting (with transcription-activation domain) protein 1                                             |
| 0,700763725 | 0,04721 | 0,810003474 | 0,0032  | PBRM1   | polybromo 1                                                                                                  |
| 0,630251696 | 0,04592 | 0,624598063 | 0,00845 | PBRM1   | polybromo 1                                                                                                  |
| 0,7031966   | 0,00135 | 0,748461493 | 0,00042 | PBX3    | pre-B-cell leukemia homeobox 3                                                                               |
| 0,751580739 | 0,01493 | 0,733566672 | 0,0001  | PCBD2   | pterin-4 alpha-carbinolamine dehydratase/dimerization cofactor of hepatocyte nuclear factor 1 alpha (TCF1) 2 |
| 0,734075318 | 0,00153 | 0,721464343 | 0,00023 | PCBD2   | pterin-4 alpha-carbinolamine dehydratase/dimerization cofactor of hepatocyte nuclear factor 1 alpha (TCF1) 2 |
| 2,064797071 | 0,00096 | 1,546492675 | 0,0001  | PCDH17  | protocadherin 17                                                                                             |
| 2,418311352 | 0,00198 | 1,725482689 | 0,00005 | PCDH17  | protocadherin 17                                                                                             |
| 1,962918128 | 0,00645 | 1,566994374 | 0       | PCDH17  | protocadherin 17                                                                                             |
| 1,194163187 | 0,04791 | 1,199139914 | 0,00854 | PCDH18  | protocadherin 18                                                                                             |
| 0,658383461 | 0,00496 | 0,798298386 | 0,04023 | PCDH7   | protocadherin 7                                                                                              |
| 0,480963727 | 0,03235 | 0,625031151 | 0,0012  | PCDH7   | protocadherin 7                                                                                              |
| 0,822450069 | 0,03301 | 0,886381699 | 0,02001 | PCDHGA8 | protocadherin gamma subfamily A, 8                                                                           |
| 0,682073917 | 0,00976 | 0,846745312 | 0,00807 | PCGF3   | polycomb group ring finger 3                                                                                 |
| 0,571173123 | 0,01961 | 0,777546036 | 0,00429 | PCM1    | pericentriolar material 1                                                                                    |
| 1,234562607 | 0,03746 | 1,136029265 | 0,01855 | PCSK4   | proprotein convertase subtilisin/kexin type 4                                                                |
| 0,554016174 | 0,00234 | 0,593779833 | 0,00012 | PCSK6   | proprotein convertase subtilisin/kexin type 6                                                                |
| 0,61429349  | 0,01653 | 0,775930854 | 0,00029 | PCSK7   | proprotein convertase subtilisin/kexin type 7                                                                |
| 0,66342257  | 0,01142 | 0,684441907 | 0,00289 | PCYT1A  | phosphate cytidyltransferase 1, choline, alpha                                                               |
| 0,649319301 | 0,00542 | 0,719965659 | 0,00002 | PDCD2   | programmed cell death 2                                                                                      |
| 0,616426163 | 0,03491 | 0,817902059 | 0,00666 | PDCD4   | programmed cell death 4 (neoplastic transformation inhibitor)                                                |
| 0,682073917 | 0,01762 | 0,742261785 | 0,00117 | PDCD5   | programmed cell death 5                                                                                      |
| 0,689202576 | 0,02597 | 0,763129604 | 0,00023 | PDCD6   | programmed cell death 6                                                                                      |
| 0,7031966   | 0,00267 | 0,681601304 | 0,0001  | PDCD6   | programmed cell death 6                                                                                      |
| 0,667574152 | 0,0161  | 0,751059963 | 0,00093 | PDCD6IP | programmed cell death 6 interacting protein                                                                  |
| 0,549427109 | 0,03162 | 0,671751713 | 0,00022 | PDCD7   | programmed cell death 7                                                                                      |
| 1,561572985 | 0,01316 | 1,159095952 | 0,03685 | PDE10A  | phosphodiesterase 10A                                                                                        |
| 1,489677463 | 0,0212  | 1,180174343 | 0,01929 | PDE1A   | phosphodiesterase 1A, calmodulin-dependent                                                                   |
| 1,163926534 | 0,04407 | 1,124278924 | 0,01753 | PDE3B   | phosphodiesterase 3B, cGMP-inhibited                                                                         |
| 1,745935182 | 0,00127 | 1,374588696 | 0,007   | PDE4A   | phosphodiesterase 4A, cAMP-specific                                                                          |
| 1,882956929 | 0,00142 | 1,611048582 | 0,00042 | PDE4B   | phosphodiesterase 4B, cAMP-specific                                                                          |
| 1,545421099 | 0,0088  | 1,678299274 | 0,00013 | PDE4B   | phosphodiesterase 4B, cAMP-specific                                                                          |
| 1,258757174 | 0,02219 | 1,188383105 | 0,00208 | PDE4C   | phosphodiesterase 4C, cAMP-specific                                                                          |
| 1,248330549 | 0,00471 | 1,273677475 | 0,00012 | PDE4DIP | phosphodiesterase 4D interacting protein                                                                     |
| 1,433955248 | 0,01408 | 1,377450046 | 0,0017  | PDE4DIP | phosphodiesterase 4D interacting protein                                                                     |
| 1,38991822  | 0,03981 | 1,337927555 | 0,01677 | PDE7B   | phosphodiesterase 7B                                                                                         |
| 1,395710764 | 0,02352 | 1,251796459 | 0,0403  | PDE8B   | phosphodiesterase 8B                                                                                         |
| 1,485552921 | 0,02236 | 1,185914499 | 0,03839 | PDE9A   | phosphodiesterase 9A                                                                                         |
| 1,32592576  | 0,04952 | 1,321338406 | 0       | PDGFB   | platelet-derived growth factor beta polypeptide                                                              |
| 0,595015848 | 0,03822 | 0,685391402 | 0,00207 | PDGFC   | platelet derived growth factor C                                                                             |
| 1,858321349 | 0,0099  | 1,547564994 | 0,00115 | PDGFD   | platelet derived growth factor D                                                                             |
| 1,262252032 | 0,03082 | 1,513616793 | 0,00071 | PDGFD   | platelet derived growth factor D                                                                             |
| 1,563739286 | 0,00138 | 1,376495602 | 0,00046 | PDIA4   | protein disulfide isomerase family A, member 4                                                               |
| 1,626758396 | 0,02498 | 1,583371732 | 0,00001 | PDIA5   | protein disulfide isomerase family A, member 5                                                               |
| 2,279946545 | 0,00006 | 1,821339667 | 0,00021 | PKD1    | pyruvate dehydrogenase kinase, isozyme 1                                                                     |
| 0,720464874 | 0,03012 | 0,85797053  | 0,02997 | PKD3    | pyruvate dehydrogenase kinase, isozyme 3                                                                     |
| 0,580754366 | 0,0362  | 0,733058379 | 0,00181 | PDLIM2  | PDZ and LIM domain 2 (mystique)                                                                              |
| 1,269270886 | 0,02788 | 1,170398641 | 0,01562 | PDLIM3  | PDZ and LIM domain 3                                                                                         |
| 1,28877463  | 0,00823 | 1,160703914 | 0,02811 | PDLIM3  | PDZ and LIM domain 3                                                                                         |
| 0,445037867 | 0,00144 | 0,70514898  | 0,03097 | PDLIM5  | PDZ and LIM domain 5                                                                                         |
| 0,419574819 | 0,00431 | 0,76154437  | 0,0025  | PDLIM5  | PDZ and LIM domain 5                                                                                         |
| 0,645728675 | 0,01761 | 0,777007269 | 0,00018 | PDLIM5  | PDZ and LIM domain 5                                                                                         |
| 0,708578698 | 0,03694 | 0,818469182 | 0,01289 | PDSSA   | PDSS, regulator of cohesion maintenance, homolog A (S. cerevisiae)                                           |
| 0,847919965 | 0,01585 | 0,801069878 | 0,00235 | PDSS1   | prenyl (decaprenyl) diphosphate synthase, subunit 1                                                          |
| 0,727490342 | 0,0165  | 0,858565436 | 0,01022 | PDZD11  | PDZ domain containing 11                                                                                     |
| 0,459138081 | 0,00491 | 0,699792933 | 0,00227 | PDZD2   | PDZ domain containing 2                                                                                      |
| 0,796088099 | 0,01166 | 0,788946841 | 0,01087 | PDZD2   | PDZ domain containing 2                                                                                      |
| 3,082284433 | 0,00558 | 2,281527432 | 0,00042 | PDZRN4  | PDZ domain containing ring finger 4                                                                          |
| 1,775222675 | 0,00267 | 1,368883813 | 0,00021 | PEAR1   | platelet endothelial aggregation receptor 1                                                                  |
| 2,194663875 | 0,00034 | 1,759298152 | 0,00005 | PECAM1  | platelet/endothelial cell adhesion molecule                                                                  |
| 1,218410264 | 0,01891 | 1,188383105 | 0,02168 | PECAM1  | platelet/endothelial cell adhesion molecule                                                                  |
| 2,521006783 | 0,00002 | 2,267338826 | 0       | PECAM1  | platelet/endothelial cell adhesion molecule                                                                  |
| 2,105262309 | 0,00048 | 2,181015465 | 0       | PECAM1  | platelet/endothelial cell adhesion molecule                                                                  |
| 0,656105627 | 0,03463 | 0,840896415 | 0,00424 | PELO    | pelota homolog (Drosophila)                                                                                  |
| 0,844986384 | 0,04475 | 0,835666959 | 0,00391 | PEMT    | phosphatidylethanolamine N-methyltransferase                                                                 |
| 0,593779833 | 0,01388 | 0,573553512 | 0,00013 | PER2    | period homolog 2 (Drosophila)                                                                                |
| 0,674083866 | 0,00787 | 0,744838732 | 0,00765 | PERP    | PERP, TP53 apoptosis effector                                                                                |
| 0,408384496 | 0,00644 | 0,544876056 | 0       | PERP    | PERP, TP53 apoptosis effector                                                                                |
| 0,706616822 | 0,04627 | 0,723969086 | 0,00263 | PEX3    | peroxisomal biogenesis factor 3                                                                              |
| 1,558329159 | 0,00365 | 1,418140036 | 0,00269 | PF4     | platelet factor 4                                                                                            |
| 0,601234624 | 0,01303 | 0,61985385  | 0,00001 | PKFB2   | 6-phosphofructo-2-kinase/fructose-2,6-bisphosphatase 2                                                       |
| 0,639492791 | 0,00168 | 0,821880187 | 0,00611 | PGAP2   | post-GPI attachment to proteins 2                                                                            |
| 0,709070018 | 0,01043 | 0,78132788  | 0,00002 | PGBD5   | piggyBac transposable element derived 5                                                                      |
| 1,512567997 | 0,00239 | 1,298638603 | 0,01051 | PGCP    | plasma glutamate carboxypeptidase                                                                            |
| 0,608783009 | 0,00546 | 0,70759708  | 0,00005 | PGM2    | phosphoglucomutase 2                                                                                         |
| 1,241427492 | 0,04505 | 1,169587664 | 0,0116  | PGM5    | phosphoglucomutase 5                                                                                         |
| 1,355664327 | 0,01542 | 1,425037614 | 0,00068 | PGM5    | phosphoglucomutase 5                                                                                         |
| 1,414213562 | 0,00389 | 1,300440147 | 0,00037 | PGPEP1  | pyroglutamyl-peptidase I                                                                                     |
| 1,439931319 | 0,00881 | 1,593280193 | 0,00002 | PGPEP1  | pyroglutamyl-peptidase I                                                                                     |
| 1,403471726 | 0,00208 | 1,559409685 | 0       | PGPEP1  | pyroglutamyl-peptidase I                                                                                     |
| 0,750539549 | 0,00888 | 0,832198735 | 0,00745 | PGRMC1  | progesterone receptor membrane component 1                                                                   |
| 0,63860688  | 0,01634 | 0,709070018 | 0,00017 | PGRMC2  | progesterone receptor membrane component 2                                                                   |
| 0,639049682 | 0,04647 | 0,693034943 | 0,00006 | PHACTR2 | phosphatase and actin regulator 2                                                                            |
| 1,433955248 | 0,00523 | 1,264003098 | 0,00101 | PHC3    | polyhomeotic homolog 3 (Drosophila)                                                                          |
| 1,243149669 | 0,01047 | 1,133669413 | 0,02353 | PHEX    | phosphate regulating endopeptidase homolog, X-linked                                                         |
| 1,516767545 | 0,00155 | 1,289668251 | 0,00643 | PHF1    | PHD finger protein 1                                                                                         |
| 0,720964436 | 0,03547 | 0,859756486 | 0,0056  | PHF10   | PHD finger protein 10                                                                                        |
| 0,771105413 | 0,01273 | 0,909408252 | 0,03787 | PHF13   | PHD finger protein 13                                                                                        |
| 0,635515845 | 0,03066 | 0,706616822 | 0,00002 | PHF14   | PHD finger protein 14                                                                                        |
| 0,7944344   | 0,006   | 0,828744904 | 0,00289 | PHF19   | PHD finger protein 19                                                                                        |
| 1,221793102 | 0,04755 | 1,199971382 | 0,00207 | PHIP    | pleckstrin homology domain interacting protein                                                               |
| 0,620283649 | 0,00546 | 0,865136691 | 0,01604 | PHIP    | pleckstrin homology domain interacting protein                                                               |
| 0,71400199  | 0,01695 | 0,628942486 | 0,00048 | PHLDA2  | pleckstrin homology-like domain, family A, member 2                                                          |



|             |         |             |         |          |                                                                                              |
|-------------|---------|-------------|---------|----------|----------------------------------------------------------------------------------------------|
| 0,645728675 | 0,00431 | 0,692554734 | 0,00367 | PHOCN    | phocein, Mob-like protein                                                                    |
| 0,718968266 | 0,04968 | 0,71946679  | 0,00278 | PHOCN    | phocein, Mob-like protein                                                                    |
| 1,609932275 | 0,00006 | 1,345367209 | 0,0047  | PHTF1    | putative homeodomain transcription factor 1                                                  |
| 1,342572503 | 0,00546 | 1,203303026 | 0,00538 | PHTF1    | putative homeodomain transcription factor 1                                                  |
| 0,796088099 | 0,03193 | 0,808881348 | 0,00609 | PIAS4    | protein inhibitor of activated STAT, 4                                                       |
| 1,385109468 | 0,00142 | 1,231998073 | 0,00243 | PIF1     | PIF1 5'-to-3' DNA helicase homolog (S. cerevisiae)                                           |
| 0,791137301 | 0,00772 | 0,853226098 | 0,00382 | PIGC     | phosphatidylinositol glycan anchor biosynthesis, class C                                     |
| 0,731028724 | 0,02186 | 0,858565436 | 0,01409 | PIGF     | phosphatidylinositol glycan anchor biosynthesis, class F                                     |
| 0,595841287 | 0,00155 | 0,76950361  | 0,00442 | PIGN     | phosphatidylinositol glycan anchor biosynthesis, class N                                     |
| 0,609627547 | 0,01625 | 0,622868708 | 0,00001 | PIGW     | phosphatidylinositol glycan anchor biosynthesis, class W                                     |
| 0,549046407 | 0,01339 | 0,678302164 | 0,00284 | PIGY     | phosphatidylinositol glycan anchor biosynthesis, class Y                                     |
| 1,599920257 | 0,00067 | 1,266634254 | 0,00209 | PIK3AP1  | phosphoinositide-3-kinase adaptor protein 1                                                  |
| 2,191623533 | 0,00015 | 1,522033381 | 0,00143 | PIK3AP1  | phosphoinositide-3-kinase adaptor protein 1                                                  |
| 0,616426163 | 0,00192 | 0,776468875 | 0,00627 | PIK3C3   | phosphoinositide-3-kinase, class 3                                                           |
| 0,622005827 | 0,03594 | 0,755236293 | 0,00095 | PIK3CB   | phosphoinositide-3-kinase, catalytic, beta polypeptide                                       |
| 1,319507911 | 0,00435 | 1,252664439 | 0,01169 | PIK3CD   | phosphoinositide-3-kinase, catalytic, delta polypeptide                                      |
| 1,392811481 | 0,00993 | 1,175276328 | 0,03614 | PIK3CG   | phosphoinositide-3-kinase, catalytic, gamma polypeptide                                      |
| 1,248330549 | 0,02342 | 1,189207115 | 0,03893 | PIK3IP1  | phosphoinositide-3-kinase interacting protein 1                                              |
| 1,404444876 | 0,00825 | 1,327765158 | 0,00038 | PIK3R3   | phosphoinositide-3-kinase, regulatory subunit 3 (gamma)                                      |
| 1,257013375 | 0,01978 | 1,147902414 | 0,0451  | PIK3R5   | phosphoinositide-3-kinase, regulatory subunit 5                                              |
| 1,331451613 | 0,02353 | 1,297738767 | 0,00063 | PIK3R6   | phosphoinositide-3-kinase, regulatory subunit 6                                              |
| 0,727490342 | 0,00181 | 0,767373048 | 0,00521 | PIM1     | pim-1 oncogene                                                                               |
| 2,830388321 | 0,00008 | 2,228387302 | 0,00009 | PIM2     | pim-2 oncogene                                                                               |
| 0,716480825 | 0,00524 | 0,806082831 | 0,00004 | PIN4     | protein (peptidylprolyl cis/trans isomerase) NIMA-interacting, 4 (parvulin)                  |
| 0,668500248 | 0,01042 | 0,754190038 | 0,00012 | PIN4     | protein (peptidylprolyl cis/trans isomerase) NIMA-interacting, 4 (parvulin)                  |
| 1,315854525 | 0,03191 | 1,339783602 | 0,00118 | PIP4K2A  | phosphatidylinositol-5-phosphate 4-kinase, type II, alpha                                    |
| 0,729004689 | 0,01697 | 0,831622098 | 0,00693 | PIP4K2C  | phosphatidylinositol-5-phosphate 4-kinase, type II, gamma                                    |
| 3,640155296 | 0,00005 | 2,131693472 | 0,00014 | PIP5K1B  | phosphatidylinositol-4-phosphate 5-kinase, type I, beta                                      |
| 0,426317446 | 0,00039 | 0,695440986 | 0,00005 | PIR      | pirin (iron-binding nuclear protein)                                                         |
| 0,733566672 | 0,01854 | 0,793883931 | 0,00322 | PITHD1   | PITH (C-terminal proteasome-interacting domain of thioredoxin-like) domain containing 1      |
| 0,648869383 | 0,00007 | 0,734075318 | 0,00002 | PITPNA   | phosphatidylinositol transfer protein, alpha                                                 |
| 0,594603558 | 0,0111  | 0,724471077 | 0,00039 | PITPNA   | phosphatidylinositol transfer protein, alpha                                                 |
| 0,595428425 | 0,01326 | 0,830470024 | 0,00271 | PITPNA   | phosphatidylinositol transfer protein, alpha                                                 |
| 0,652477474 | 0,01931 | 0,849096246 | 0,00052 | PITPNB   | phosphatidylinositol transfer protein, beta                                                  |
| 0,571569168 | 0,00911 | 0,647521499 | 0,00003 | PITPNM3  | PITPNM family member 3                                                                       |
| 1,828930179 | 0,00036 | 1,356604327 | 0,00336 | PKHD1L1  | polycystic kidney and hepatic disease 1 (autosomal recessive)-like 1                         |
| 1,591072968 | 0,00573 | 1,527317498 | 0,00007 | PKIG     | protein kinase (cAMP-dependent, catalytic) inhibitor gamma                                   |
| 1,417157397 | 0,03633 | 1,348167732 | 0,01069 | PKN1     | protein kinase N1                                                                            |
| 0,379981214 | 0,00537 | 0,665264521 | 0,00159 | PKP1     | plakophilin 1 (ectodermal dysplasia/skin fragility syndrome)                                 |
| 0,472701058 | 0,02922 | 0,652025368 | 0,01629 | PKP3     | plakophilin 3                                                                                |
| 0,421615555 | 0,00634 | 0,66342257  | 0,00437 | PKP3     | plakophilin 3                                                                                |
| 0,658383461 | 0,03467 | 0,90312651  | 0,03762 | PKP4     | plakophilin 4                                                                                |
| 1,965641197 | 0,00021 | 1,612165663 | 0,00006 | PLA1A    | phospholipase A1 member A                                                                    |
| 0,558643569 | 0,04175 | 0,623300597 | 0,00004 | PLA2G12A | phospholipase A2, group XIIA                                                                 |
| 0,589678296 | 0,03344 | 0,744838732 | 0,00029 | PLA2G12A | phospholipase A2, group XIIA                                                                 |
| 1,549711862 | 0,01225 | 1,573524891 | 0,00006 | PLA2G2D  | phospholipase A2, group IID                                                                  |
| 0,659296807 | 0,00552 | 0,696888619 | 0,00005 | PLA2G3   | phospholipase A2, group III                                                                  |
| 1,50733491  | 0,00656 | 1,564823563 | 0,00105 | PLA2G4C  | phospholipase A2, group IVC (cytosolic, calcium-independent)                                 |
| 1,322254605 | 0,00914 | 1,143138335 | 0,04471 | PLA2G5   | phospholipase A2, group V                                                                    |
| 1,634670657 | 0,01228 | 1,481439798 | 0,04814 | PLA2G7   | phospholipase A2, group VII (platelet-activating factor acetylhydrolase, plasma)             |
| 0,512633619 | 0,00175 | 0,525586455 | 0       | PLA2R1   | phospholipase A2 receptor 1, 180kDa                                                          |
| 0,638164384 | 0,01096 | 0,735093668 | 0,00026 | PLAA     | phospholipase A2-activating protein                                                          |
| 2,848100391 | 0,00256 | 2,080600533 | 0,00163 | PLAC8    | placenta-specific 8                                                                          |
| 2,363623094 | 0,00382 | 1,86218964  | 0,00107 | PLAT     | plasminogen activator, tissue                                                                |
| 1,293248932 | 0,0391  | 1,285206337 | 0,00107 | PLCB2    | phospholipase C, beta 2                                                                      |
| 2,02791896  | 0,00004 | 1,742308384 | 0,0001  | PLCG2    | phospholipase C, gamma 2 (phosphatidylinositol-specific)                                     |
| 1,383190629 | 0,03152 | 1,396678532 | 0,00384 | PLCL2    | phospholipase C-like 2                                                                       |
| 1,196648963 | 0,04836 | 1,149494848 | 0,04912 | PLCL2    | phospholipase C-like 2                                                                       |
| 0,664342907 | 0,01711 | 0,849096246 | 0,02466 | PLCXD1   | phosphatidylinositol-specific phospholipase C, X domain containing 1                         |
| 0,538493188 | 0,00139 | 0,815637493 | 0,01665 | PLD1     | phospholipase D1, phosphatidylcholine-specific                                               |
| 0,577943353 | 0,00006 | 0,851453708 | 0,03897 | PLD1     | phospholipase D1, phosphatidylcholine-specific                                               |
| 0,524494664 | 0,02601 | 0,71548826  | 0,04745 | PLD1     | phospholipase D1, phosphatidylcholine-specific                                               |
| 0,414947293 | 0,00319 | 0,767373048 | 0,00317 | PLD1     | phospholipase D1, phosphatidylcholine-specific                                               |
| 1,910565873 | 0,00002 | 1,548638056 | 0,0002  | PLEK     | pleckstrin                                                                                   |
| 0,76950361  | 0,03317 | 0,860949188 | 0,00349 | PLEK2    | pleckstrin 2                                                                                 |
| 0,449066186 | 0,02098 | 0,685391402 | 0,00049 | PLEKHA1  | pleckstrin homology domain containing, family A (phosphoinositide binding specific) member 1 |
| 0,54638887  | 0,0173  | 0,622868708 | 0,00004 | PLEKHA1  | pleckstrin homology domain containing, family A (phosphoinositide binding specific) member 1 |
| 0,734075318 | 0,0042  | 0,566049451 | 0,0001  | PLEKHA5  | pleckstrin homology domain containing, family A member 5                                     |
| 1,348167732 | 0,04912 | 1,325007017 | 0,00017 | PLEKHA6  | pleckstrin homology domain containing, family A member 6                                     |
| 0,614719434 | 0,04953 | 0,638164384 | 0,02343 | PLEKHF2  | pleckstrin homology domain containing, family F (with FYVE domain) member 2                  |
| 1,384149716 | 0,02768 | 1,338855257 | 0,00024 | PLEKHG2  | pleckstrin homology domain containing, family G (with RhoGef domain) member 2                |
| 0,788946841 | 0,03919 | 0,7944344   | 0,00877 | PLEKHG4  | pleckstrin homology domain containing, family G (with RhoGef domain) member 4                |
| 0,663882579 | 0,04218 | 0,735093668 | 0,00336 | PLK2     | polo-like kinase 2                                                                           |
| 1,219255094 | 0,01908 | 1,164733586 | 0,00259 | PLK5     | polo-like kinase 5                                                                           |
| 0,709561678 | 0,00878 | 0,8362464   | 0,00226 | PLRG1    | pleiotropic regulator 1                                                                      |
| 1,512567997 | 0,01217 | 1,512567997 | 0,00016 | PLXDC1   | plexin domain containing 1                                                                   |
| 0,410940094 | 0,00014 | 0,591725511 | 0,00001 | PLXDC2   | plexin domain containing 2                                                                   |
| 0,652929894 | 0,00075 | 0,774319028 | 0,00069 | PLXNA2   | plexin A2                                                                                    |
| 1,854461093 | 0,00006 | 1,652900636 | 0,00045 | PLXNC1   | plexin C1                                                                                    |
| 1,472226862 | 0,02846 | 1,575707772 | 0,00009 | PLXND1   | plexin D1                                                                                    |
| 0,71400199  | 0,01365 | 0,832198735 | 0,02945 | PMVK     | phosphomevalonate kinase                                                                     |
| 1,401527449 | 0,0261  | 1,226884977 | 0,00821 | PNKD     | paroxysmal nonkinesigenic dyskinesia                                                         |
| 0,565265284 | 0,01966 | 0,729004689 | 0,00018 | PNN      | pinin, desmosome associated protein                                                          |
| 0,589678296 | 0,02578 | 0,758383773 | 0,00242 | PNN      | pinin, desmosome associated protein                                                          |
| 0,71548826  | 0,01961 | 0,763658749 | 0,00567 | PNO1     | partner of NOB1 homolog (S. cerevisiae)                                                      |
| 2,865923301 | 0,00001 | 2,303775285 | 0       | PNO2     | prepronociceptin                                                                             |
| 0,835666959 | 0,03161 | 0,819036698 | 0,00534 | PNPLA3   | patatin-like phospholipase domain containing 3                                               |
| 0,596254436 | 0,03575 | 0,750539549 | 0,04633 | PNRC2    | proline-rich nuclear receptor coactivator 2                                                  |
| 1,30224419  | 0,00463 | 1,241427492 | 0,00259 | POCS     | POCS centrorial protein homolog (Chlamydomonas)                                              |
| 0,642157904 | 0,03249 | 0,727490342 | 0,00095 | POF1B    | premature ovarian failure, 1B                                                                |
| 0,228299563 | 0,00006 | 0,460093825 | 0,00782 | POF1B    | premature ovarian failure, 1B                                                                |
| 0,25191344  | 0,00005 | 0,428688018 | 0,00006 | POF1B    | premature ovarian failure, 1B                                                                |
| 0,535886731 | 0,04611 | 0,803850991 | 0,01256 | POGK     | pogo transposable element with KRAB domain                                                   |
| 0,821310701 | 0,00889 | 0,841479482 | 0,0028  | POGK     | pogo transposable element with KRAB domain                                                   |
| 0,616853585 | 0,03971 | 0,763658749 | 0,00022 | POGZ     | pogo transposable element with ZNF domain                                                    |
| 0,677362489 | 0,0287  | 0,790041312 | 0,00754 | POLE3    | polymerase (DNA directed), epsilon 3 (p17 subunit)                                           |
| 0,720464874 | 0,00937 | 0,853226098 | 0,03896 | POLE4    | polymerase (DNA-directed), epsilon 4 (p12 subunit)                                           |
| 0,743291492 | 0,02602 | 0,795536484 | 0,02552 | POLH     | polymerase (DNA directed), eta                                                               |

|             |         |             |         |           |                                                                              |
|-------------|---------|-------------|---------|-----------|------------------------------------------------------------------------------|
| 0,658839976 | 0,02806 | 0,873572896 | 0,03233 | POLR1C    | polymerase (RNA) I polypeptide C, 30kDa                                      |
| 0,767905135 | 0,00515 | 0,753667455 | 0,00003 | POLR1C    | polymerase (RNA) I polypeptide C, 30kDa                                      |
| 0,637722196 | 0,00136 | 0,757333158 | 0,00007 | POLR1D    | polymerase (RNA) I polypeptide D, 16kDa                                      |
| 0,668037039 | 0,00497 | 0,814507563 | 0,00102 | POLR1D    | polymerase (RNA) I polypeptide D, 16kDa                                      |
| 0,778624691 | 0,00534 | 0,852634892 | 0,00409 | POLR1E    | polymerase (RNA) I polypeptide E, 53kDa                                      |
| 1,185914499 | 0,02424 | 1,110338834 | 0,01141 | POLR2C    | polymerase (RNA) II (DNA directed) polypeptide C, 33kDa                      |
| 0,604158922 | 0,03133 | 0,843231111 | 0,01648 | POLR2I    | polymerase (RNA) II (DNA directed) polypeptide I, 14.5kDa                    |
| 0,756808396 | 0,01192 | 0,823591017 | 0,00151 | POLR3C    | polymerase (RNA) III (DNA directed) polypeptide C (62kD)                     |
| 0,74277646  | 0,00334 | 0,733058379 | 0,00008 | POM121    | POM121 membrane glycoprotein                                                 |
| 1,267512522 | 0,03741 | 1,582274602 | 0       | POM121L12 | POM121 membrane glycoprotein-like 12                                         |
| 1,356604327 | 0,01381 | 1,235418637 | 0,01532 | POM121L12 | POM121 membrane glycoprotein-like 12                                         |
| 0,635956503 | 0,00587 | 0,793333843 | 0,00393 | PON2      | paraoxonase 2                                                                |
| 0,78132788  | 0,00534 | 0,826450318 | 0,00299 | POP4      | processing of precursor 4, ribonuclease P/MRP subunit (S. cerevisiae)        |
| 0,76101669  | 0,00449 | 0,832198735 | 0,00224 | POP7      | processing of precursor 7, ribonuclease P/MRP subunit (S. cerevisiae)        |
| 1,204137381 | 0,03837 | 1,141554707 | 0,02598 | POPDC2    | popeye domain containing 2                                                   |
| 5,045509635 | 0,00007 | 3,934008296 | 0,00001 | POU2AF1   | POU class 2 associating factor 1                                             |
| 1,693490625 | 0,00337 | 2,011121161 | 0,00141 | POU2F2    | POU class 2 homeobox 2                                                       |
| 1,446934886 | 0,01047 | 1,400556321 | 0,00175 | POU2F2    | POU class 2 homeobox 2                                                       |
| 0,798851916 | 0,00735 | 0,866336856 | 0,03936 | POU2F3    | POU class 2 homeobox 3                                                       |
| 0,652929894 | 0,01933 | 0,797192477 | 0,01005 | POU3F1    | POU class 3 homeobox 1                                                       |
| 0,50243191  | 0,00526 | 0,586417475 | 0,00025 | PP13439   | hypothetical LOC100128046                                                    |
| 0,672683604 | 0,04796 | 0,811127156 | 0,00531 | PPA1      | pyrophosphatase (inorganic) 1                                                |
| 1,807505454 | 0,01798 | 1,715941061 | 0,00011 | PPAPDC1B  | phosphatidic acid phosphatase type 2 domain containing 1B                    |
| 1,964279191 | 0,00256 | 1,715941061 | 0,00005 | PPAPDC1B  | phosphatidic acid phosphatase type 2 domain containing 1B                    |
| 2,657371628 | 0,00006 | 1,910565873 | 0,00042 | PPAPDC1B  | phosphatidic acid phosphatase type 2 domain containing 1B                    |
| 1,686462221 | 0,00339 | 1,634670657 | 0,00073 | PPAPDC1B  | phosphatidic acid phosphatase type 2 domain containing 1B                    |
| 1,557249382 | 0,00495 | 1,395710764 | 0,00002 | PPAPDC3   | phosphatidic acid phosphatase type 2 domain containing 3                     |
| 2,300583787 | 0,01388 | 1,680627504 | 0,01124 | PPBP      | pro-platelet basic protein (chemokine (C-X-C motif) ligand 7)                |
| 1,623379162 | 0,00887 | 1,463071221 | 0,00091 | PPCDC     | phosphopantothenoylcysteine decarboxylase                                    |
| 0,768970416 | 0,00239 | 0,752623374 | 0,00019 | PPCS      | phosphopantothenoylcysteine synthetase                                       |
| 0,592546385 | 0,03628 | 0,78132788  | 0,003   | PPF1BP1   | PTPRF interacting protein, binding protein 1 (liprin beta 1)                 |
| 0,738669032 | 0,03004 | 0,865136691 | 0,00221 | PPF1BP2   | PTPRF interacting protein, binding protein 2 (liprin beta 2)                 |
| 0,674083866 | 0,02479 | 0,917639882 | 0,03017 | PPIA      | peptidylprolyl isomerase A (cyclophilin A)                                   |
| 0,66296288  | 0,01536 | 0,547905883 | 0,00002 | PPIA      | peptidylprolyl isomerase A (cyclophilin A)                                   |
| 0,613867842 | 0,02579 | 0,656560563 | 0,00497 | PPID      | peptidylprolyl isomerase D                                                   |
| 0,624598063 | 0,0269  | 0,724973416 | 0,00038 | PPID      | peptidylprolyl isomerase D                                                   |
| 0,677832163 | 0,02158 | 0,709561678 | 0,00512 | PPIF      | peptidylprolyl isomerase F                                                   |
| 0,687770909 | 0,01145 | 0,746389192 | 0,0001  | PPIG      | peptidylprolyl isomerase G (cyclophilin G)                                   |
| 0,679243142 | 0,00902 | 0,910038824 | 0,04424 | PPIH      | peptidylprolyl isomerase H (cyclophilin H)                                   |
| 0,780786493 | 0,04534 | 0,844986384 | 0,00979 | PPII1     | peptidylprolyl isomerase (cyclophilin)-like 1                                |
| 0,639492791 | 0,01583 | 0,479299719 | 0,00023 | PPM1A     | protein phosphatase, Mg2+/Mn2+ dependent, 1A                                 |
| 0,383686524 | 0,0031  | 0,452816992 | 0,00001 | PPM1L     | protein phosphatase, Mg2+/Mn2+ dependent, 1L                                 |
| 0,583983697 | 0,00145 | 0,55171687  | 0,00001 | PPM1L     | protein phosphatase, Mg2+/Mn2+ dependent, 1L                                 |
| 0,562139462 | 0,03237 | 0,539614118 | 0,00002 | PPM1L     | protein phosphatase, Mg2+/Mn2+ dependent, 1L                                 |
| 1,395710764 | 0,01019 | 1,436940177 | 0,00039 | PPM1M     | protein phosphatase, Mg2+/Mn2+ dependent, 1M                                 |
| 1,960198831 | 0,00066 | 1,348167732 | 0,00125 | PPOX      | protoporphyrinogen oxidase                                                   |
| 0,61429349  | 0,01415 | 0,633317127 | 0,00003 | PPP1CB    | protein phosphatase 1, catalytic subunit, beta isozyme                       |
| 1,345367209 | 0,04237 | 1,364147835 | 0,00028 | PPP1R14A  | protein phosphatase 1, regulatory (inhibitor) subunit 14A                    |
| 0,39447342  | 0,00021 | 0,577142709 | 0       | PPP1R14C  | protein phosphatase 1, regulatory (inhibitor) subunit 14C                    |
| 1,990319444 | 0,00014 | 1,547564994 | 0,00001 | PPP1R16B  | protein phosphatase 1, regulatory (inhibitor) subunit 16B                    |
| 1,692317193 | 0,00608 | 1,397646972 | 0,00082 | PPP1R16B  | protein phosphatase 1, regulatory (inhibitor) subunit 16B                    |
| 1,946658748 | 0,00003 | 1,607701981 | 0,00001 | PPP1R16B  | protein phosphatase 1, regulatory (inhibitor) subunit 16B                    |
| 0,716480825 | 0,03361 | 0,756808396 | 0,00077 | PPP1R3D   | protein phosphatase 1, regulatory (inhibitor) subunit 3D                     |
| 0,698823486 | 0,03237 | 0,815072332 | 0,00399 | PPP1R3D   | protein phosphatase 1, regulatory (inhibitor) subunit 3D                     |
| 0,653382627 | 0,02488 | 0,859160755 | 0,00787 | PPP1R7    | protein phosphatase 1, regulatory (inhibitor) subunit 7                      |
| 0,722966147 | 0,0298  | 0,867538687 | 0,00864 | PPP2R2A   | protein phosphatase 2, regulatory subunit B, alpha                           |
| 0,647521499 | 0,03832 | 0,730522189 | 0,0012  | PPP2R2B   | protein phosphatase 2, regulatory subunit B, beta                            |
| 0,477641468 | 0,00027 | 0,765778999 | 0,01963 | PPP2R2C   | protein phosphatase 2, regulatory subunit B, gamma                           |
| 0,414947293 | 0,00011 | 0,651122095 | 0,00117 | PPP2R2C   | protein phosphatase 2, regulatory subunit B, gamma                           |
| 0,639492791 | 0,00222 | 0,74277646  | 0,00846 | PPP2R3A   | protein phosphatase 2, regulatory subunit B'', alpha                         |
| 0,657927263 | 0,03912 | 0,734584317 | 0,00139 | PPP2R3A   | protein phosphatase 2, regulatory subunit B'', alpha                         |
| 0,503128912 | 0,00468 | 0,673150035 | 0,00009 | PPP2R3A   | protein phosphatase 2, regulatory subunit B'', alpha                         |
| 0,743806881 | 0,03914 | 0,894404902 | 0,01109 | PPP2R5A   | protein phosphatase 2, regulatory subunit B', alpha                          |
| 0,597495602 | 0,02336 | 0,771640088 | 0,00009 | PPP2R5C   | protein phosphatase 2, regulatory subunit B', gamma                          |
| 1,246601194 | 0,01226 | 1,088997015 | 0,03414 | PPP3CC    | protein phosphatase 3, catalytic subunit, gamma isozyme                      |
| 1,340712592 | 0,02749 | 1,38991822  | 0,00008 | PRAF2     | PRA1 domain family, member 2                                                 |
| 1,294145654 | 0,00322 | 1,335148303 | 0,00001 | PRCP      | prolylcarboxypeptidase (angiotensinase C)                                    |
| 0,775393206 | 0,03751 | 0,880259014 | 0,01595 | PRDX2     | peroxiredoxin 2                                                              |
| 1,880348405 | 0,00005 | 1,5888688   | 0,00004 | PRDX4     | peroxiredoxin 4                                                              |
| 0,711531731 | 0,00439 | 0,823020345 | 0,00266 | PRDX6     | peroxiredoxin 6                                                              |
| 0,634635443 | 0,00012 | 0,730016005 | 0,00003 | PRDX6     | peroxiredoxin 6                                                              |
| 1,366987452 | 0,03234 | 1,30224419  | 0,00392 | PREB      | prolactin regulatory element binding                                         |
| 0,737134609 | 0,00247 | 0,87175824  | 0,04928 | PREP      | prolyl endopeptidase                                                         |
| 1,821339667 | 0,00657 | 1,496922987 | 0,00009 | PREX1     | phosphatidylinositol-3,4,5-trisphosphate-dependent Rac exchange factor 1     |
| 1,510472586 | 0,00216 | 1,434949535 | 0,00021 | PREX1     | phosphatidylinositol-3,4,5-trisphosphate-dependent Rac exchange factor 1     |
| 1,296839555 | 0,02001 | 1,276328769 | 0,00051 | PRF1      | perforin 1 (pore forming protein)                                            |
| 1,597703833 | 0,00061 | 1,257013375 | 0,00033 | PRF1      | perforin 1 (pore forming protein)                                            |
| 0,691116103 | 0,02234 | 0,723467443 | 0,00551 | PRIMA1    | proline rich membrane anchor 1                                               |
| 1,497960934 | 0,0377  | 1,22603486  | 0,03007 | PRKACB    | protein kinase, cAMP-dependent, catalytic, beta                              |
| 1,278985581 | 0,02928 | 1,25092908  | 0,00056 | PRKAG2    | protein kinase, AMP-activated, gamma 2 non-catalytic subunit                 |
| 1,326845141 | 0,00208 | 1,223488041 | 0,02666 | PRKAG2    | protein kinase, AMP-activated, gamma 2 non-catalytic subunit                 |
| 1,921189728 | 0,02804 | 1,412254404 | 0,01757 | PRKCB     | protein kinase C, beta                                                       |
| 2,134650676 | 0,00006 | 1,662091723 | 0,00246 | PRKCB     | protein kinase C, beta                                                       |
| 1,570256237 | 0,00639 | 1,511519928 | 0,00007 | PRKCC     | protein kinase C, theta                                                      |
| 1,450952208 | 0,01726 | 1,353786279 | 0,00057 | PRKCC     | protein kinase C, theta                                                      |
| 0,661127303 | 0,00197 | 0,741747467 | 0,00031 | PRKDC     | protein kinase, DNA-activated, catalytic polypeptide                         |
| 0,671751713 | 0,01071 | 0,737134609 | 0,00227 | PRKRA     | protein kinase, interferon-inducible double stranded RNA dependent activator |
| 0,508035071 | 0,00281 | 0,757858283 | 0,00094 | PRKX      | protein kinase, X-linked                                                     |
| 1,377450046 | 0,0246  | 1,198309021 | 0,00777 | PRND      | prion protein 2 (dublet)                                                     |
| 2,852051435 | 0,00733 | 1,59549048  | 0,0085  | PROK2     | prokineticin 2                                                               |
| 1,237990291 | 0,01022 | 1,20664392  | 0,01356 | PROX1     | prospero homeobox 1                                                          |
| 1,209994089 | 0,03412 | 1,176906737 | 0,01357 | PROZ      | protein Z, vitamin K-dependent plasma glycoprotein                           |
| 0,719965659 | 0,01207 | 0,771105413 | 0,00002 | PRPF38A   | PRP38 pre-mRNA processing factor 38 (yeast) domain containing A              |
| 0,662503509 | 0,03227 | 0,808881348 | 0,01067 | PRPF40A   | PRP40 pre-mRNA processing factor 40 homolog A (S. cerevisiae)                |
| 1,29056249  | 0,01148 | 1,157490217 | 0,00936 | PRR15L    | proline rich 15-like                                                         |
| 1,181811547 | 0,04667 | 1,159095952 | 0,01574 | PRR22     | proline rich 22                                                              |
| 1,316766922 | 0,01386 | 1,419123356 | 0,00005 | PRR5L     | proline rich 5 like                                                          |
| 0,610473256 | 0,01764 | 0,497235084 | 0,00032 | PRRC2C    | proline-rich coiled-coil 2C                                                  |

|             |         |             |         |         |                                                                                              |
|-------------|---------|-------------|---------|---------|----------------------------------------------------------------------------------------------|
| 0,608783009 | 0,03046 | 0,665264521 | 0,00299 | PRRG4   | proline rich Gla (G-carboxyglutamic acid) 4 (transmembrane)                                  |
| 0,793333843 | 0,04852 | 0,812252396 | 0,03899 | PRSS2   | protease, serine, 2 (trypsin 2)                                                              |
| 0,613017143 | 0,0197  | 0,781869643 | 0,03313 | PRSS3   | protease, serine, 3                                                                          |
| 0,735093668 | 0,01208 | 0,803293997 | 0,04832 | PRSS3   | protease, serine, 3                                                                          |
| 1,363202607 | 0,01009 | 1,104964485 | 0,04225 | PRUNE   | prune homolog (Drosophila)                                                                   |
| 0,669891801 | 0,03932 | 0,852634892 | 0,00211 | PSEN1   | presenilin 1                                                                                 |
| 0,796640096 | 0,02487 | 0,873572896 | 0,01824 | PSMA1   | proteasome (prosome, macropain) subunit, alpha type, 1                                       |
| 0,639936207 | 0,02196 | 0,806641759 | 0,00009 | PSMA4   | proteasome (prosome, macropain) subunit, alpha type, 4                                       |
| 0,679243142 | 0,04084 | 0,879649076 | 0,00505 | PSMB1   | proteasome (prosome, macropain) subunit, beta type, 1                                        |
| 0,610896551 | 0,04061 | 0,89688816  | 0,04042 | PSMB7   | proteasome (prosome, macropain) subunit, beta type, 7                                        |
| 0,615999037 | 0,01463 | 0,827023368 | 0,00011 | PSMC1   | proteasome (prosome, macropain) 26S subunit, ATPase, 1                                       |
| 0,710546022 | 0,01881 | 0,829319546 | 0,00472 | PSMC2   | proteasome (prosome, macropain) 26S subunit, ATPase, 2                                       |
| 0,61985385  | 0,00872 | 0,839149637 | 0,00241 | PSMC5   | proteasome (prosome, macropain) 26S subunit, ATPase, 5                                       |
| 0,623300597 | 0,01519 | 0,774319028 | 0,00425 | PSMD6   | proteasome (prosome, macropain) 26S subunit, non-ATPase, 6                                   |
| 0,743291492 | 0,01638 | 0,757858283 | 0,00001 | PSMD7   | proteasome (prosome, macropain) 26S subunit, non-ATPase, 7                                   |
| 0,623732786 | 0,01846 | 0,884540435 | 0,02778 | PSME4   | proteasome (prosome, macropain) activator subunit 4                                          |
| 0,683020128 | 0,03078 | 0,81056512  | 0,0028  | PSMG1   | proteasome (prosome, macropain) assembly chaperone 1                                         |
| 0,526315577 | 0,00015 | 0,577142709 | 0,00002 | PSMG4   | proteasome (prosome, macropain) assembly chaperone 4                                         |
| 0,757333158 | 0,01751 | 0,838568184 | 0,01131 | PTCD1   | pentatricopeptide repeat domain 1                                                            |
| 0,738157203 | 0,02236 | 0,784584098 | 0,00451 | PTEN    | phosphatase and tensin homolog                                                               |
| 0,392020227 | 0,00453 | 0,60667678  | 0,00446 | PTGER3  | prostaglandin E receptor 3 (subtype EP3)                                                     |
| 0,401925495 | 0,02277 | 0,663882579 | 0,00093 | PTGR1   | prostaglandin reductase 1                                                                    |
| 0,590496331 | 0,0052  | 0,685391402 | 0,0001  | PTGR1   | prostaglandin reductase 1                                                                    |
| 0,43467228  | 0,01004 | 0,728499557 | 0,00019 | PTGR1   | prostaglandin reductase 1                                                                    |
| 0,597495602 | 0,00597 | 0,727994774 | 0,00266 | PTGR1   | prostaglandin reductase 1                                                                    |
| 1,388955136 | 0,01221 | 1,32317144  | 0,00145 | PTK2B   | PTK2B protein tyrosine kinase 2 beta                                                         |
| 1,350037985 | 0,00371 | 1,256142381 | 0,00451 | PTK2B   | PTK2B protein tyrosine kinase 2 beta                                                         |
| 0,609627547 | 0,02083 | 0,648869383 | 0,00071 | PTK6    | PTK6 protein tyrosine kinase 6                                                               |
| 1,212512819 | 0,02657 | 1,183451022 | 0,00256 | PTN     | pleiotrophin                                                                                 |
| 0,540737382 | 0,03257 | 0,792234811 | 0,03526 | PTN     | pleiotrophin                                                                                 |
| 0,555554364 | 0,00552 | 0,740206649 | 0,02418 | PTN     | pleiotrophin                                                                                 |
| 2,71048169  | 0,01202 | 2,550888783 | 0       | PTP4A3  | protein tyrosine phosphatase type IVA, member 3                                              |
| 3,396384986 | 0,00004 | 2,373473595 | 0       | PTP4A3  | protein tyrosine phosphatase type IVA, member 3                                              |
| 1,235418637 | 0,02869 | 1,133669413 | 0,02215 | PTPN1   | protein tyrosine phosphatase, non-receptor type 1                                            |
| 1,702907415 | 0,00385 | 1,443929196 | 0,00048 | PTPN1   | protein tyrosine phosphatase, non-receptor type 1                                            |
| 0,50278029  | 0,03696 | 0,682073917 | 0,00031 | PTPN13  | protein tyrosine phosphatase, non-receptor type 13 (APO-1/CD95 (Fas)-associated phosphatase) |
| 1,303147149 | 0,02546 | 1,31494276  | 0,00022 | PTPN18  | protein tyrosine phosphatase, non-receptor type 18 (brain-derived)                           |
| 0,582770599 | 0,03559 | 0,630688704 | 0,00001 | PTPN21  | protein tyrosine phosphatase, non-receptor type 21                                           |
| 1,485552921 | 0,00503 | 1,442928687 | 0,00394 | PTPN22  | protein tyrosine phosphatase, non-receptor type 22 (lymphoid)                                |
| 1,543280175 | 0,03931 | 1,292352831 | 0,00649 | PTPN22  | protein tyrosine phosphatase, non-receptor type 22 (lymphoid)                                |
| 0,544876056 | 0,00064 | 0,663882579 | 0,00005 | PTPN3   | protein tyrosine phosphatase, non-receptor type 3                                            |
| 1,998614186 | 0,0001  | 1,622254311 | 0,00012 | PTPN7   | protein tyrosine phosphatase, non-receptor type 7                                            |
| 1,294145654 | 0,00283 | 1,216722359 | 0,00418 | PTPRA   | protein tyrosine phosphatase, receptor type, A                                               |
| 1,820077648 | 0,00481 | 1,77399261  | 0,00855 | PTPRC   | protein tyrosine phosphatase, receptor type, C                                               |
| 2,184041091 | 0,00181 | 1,64832417  | 0,00822 | PTPRC   | protein tyrosine phosphatase, receptor type, C                                               |
| 1,795020101 | 0,00059 | 1,494849249 | 0,00033 | PTPRCAP | protein tyrosine phosphatase, receptor type, C-associated protein                            |
| 1,216722359 | 0,04473 | 1,196648963 | 0,00607 | PTPRF   | protein tyrosine phosphatase, receptor type, E                                               |
| 0,580754366 | 0,02471 | 0,79774524  | 0,00633 | PTPRF   | protein tyrosine phosphatase, receptor type, F                                               |
| 0,614719434 | 0,0441  | 0,806082831 | 0,00907 | PTPRF   | protein tyrosine phosphatase, receptor type, F                                               |
| 1,572434584 | 0,00279 | 1,41519416  | 0,00037 | PTPRJ   | protein tyrosine phosphatase, receptor type, J                                               |
| 1,279872414 | 0,04311 | 1,234562607 | 0,00504 | PTPRM   | protein tyrosine phosphatase, receptor type, M                                               |
| 1,294145654 | 0,04828 | 1,293248932 | 0,00024 | PTPRN2  | protein tyrosine phosphatase, receptor type, N polypeptide 2                                 |
| 1,492778383 | 0,00478 | 1,386069886 | 0,00001 | PTPRN   | protein tyrosine phosphatase, receptor type, U                                               |
| 1,175276328 | 0,0495  | 1,136816973 | 0,01373 | PTTG1IP | pituitary tumor-transforming 1 interacting protein                                           |
| 0,498270131 | 0,0042  | 0,792784137 | 0,00004 | PURB    | purine-rich element binding protein B                                                        |
| 1,29145735  | 0,02198 | 1,219255094 | 0,0047  | PURB    | purine-rich element binding protein B                                                        |
| 0,480297432 | 0,00998 | 0,670821112 | 0,01067 | PVRL4   | poliovirus receptor-related 4                                                                |
| 0,773782497 | 0,01514 | 0,775393206 | 0,00027 | PWP1    | PWP1 homolog (S. cerevisiae)                                                                 |
| 0,659296807 | 0,00731 | 0,762600827 | 0,00004 | PWP1    | PWP1 homolog (S. cerevisiae)                                                                 |
| 1,711190051 | 0,00142 | 1,73748437  | 0,00039 | PXDN    | peroxidasin homolog (Drosophila)                                                             |
| 1,667862088 | 0,00245 | 1,859609885 | 0,00002 | PXDN    | peroxidasin homolog (Drosophila)                                                             |
| 1,494849249 | 0,01431 | 1,472226862 | 0,00021 | PXN     | paxillin                                                                                     |
| 0,705637922 | 0,01271 | 0,86934456  | 0,01056 | QARS    | glutaminyl-tRNA synthetase                                                                   |
| 1,901318202 | 0,00114 | 1,615521555 | 0,00007 | QPRT    | quinolinate phosphoribosyltransferase                                                        |
| 1,484523571 | 0,00217 | 1,377450046 | 0,00011 | QPRT    | quinolinate phosphoribosyltransferase                                                        |
| 1,235418637 | 0,03596 | 1,130530567 | 0,01583 | QSOX2   | quiescin Q6 sulfhydryl oxidase 2                                                             |
| 1,265756594 | 0,01718 | 1,243149669 | 0,00039 | R3HDM1  | R3H domain containing 1                                                                      |
| 0,77485931  | 0,03539 | 0,84986384  | 0,04403 | RAB10   | RAB10, member RAS oncogene family                                                            |
| 0,706127202 | 0,0039  | 0,771640088 | 0,00071 | RAB11A  | RAB11A, member RAS oncogene family                                                           |
| 0,538493188 | 0,00706 | 0,541862983 | 0       | RAB11A  | RAB11A, member RAS oncogene family                                                           |
| 0,609205132 | 0,00161 | 0,727994774 | 0,00369 | RAB18   | RAB18, member RAS oncogene family                                                            |
| 0,673150035 | 0,04069 | 0,737645729 | 0,04511 | RAB18   | RAB18, member RAS oncogene family                                                            |
| 1,681792831 | 0,00043 | 1,33422317  | 0,00057 | RAB20   | RAB20, member RAS oncogene family                                                            |
| 0,351111219 | 0,02872 | 0,763129604 | 0,00618 | RAB25   | RAB25, member RAS oncogene family                                                            |
| 1,561572985 | 0,00654 | 1,73868912  | 0,00004 | RAB26   | RAB26, member RAS oncogene family                                                            |
| 1,341642225 | 0,01218 | 1,502119927 | 0,00002 | RAB26   | RAB26, member RAS oncogene family                                                            |
| 0,627201102 | 0,00031 | 0,739693755 | 0,01477 | RAB27B  | RAB27B, member RAS oncogene family                                                           |
| 0,591725511 | 0,00591 | 0,620713746 | 0,00345 | RAB27B  | RAB27B, member RAS oncogene family                                                           |
| 1,422077411 | 0,01542 | 1,625631204 | 0,00037 | RAB30   | RAB30, member RAS oncogene family                                                            |
| 1,582274602 | 0,00015 | 1,472226862 | 0,00007 | RAB30   | RAB30, member RAS oncogene family                                                            |
| 2,865923301 | 0,00001 | 2,005552872 | 0,00004 | RAB30   | RAB30, member RAS oncogene family                                                            |
| 1,286989247 | 0,01772 | 1,161508732 | 0,01462 | RAB32   | RAB32, member RAS oncogene family                                                            |
| 1,402499251 | 0,00537 | 1,226884977 | 0,00145 | RAB33A  | RAB33A, member RAS oncogene family                                                           |
| 1,502119927 | 0,0006  | 1,355664327 | 0,00035 | RAB37   | RAB37, member RAS oncogene family                                                            |
| 0,662503509 | 0,00108 | 0,716480825 | 0,00031 | RAB38   | RAB38, member RAS oncogene family                                                            |
| 1,977941833 | 0,00038 | 1,231998073 | 0,00897 | RAB39B  | RAB39B, member RAS oncogene family                                                           |
| 1,221793102 | 0,0266  | 1,108800644 | 0,03972 | RAB39B  | RAB39B, member RAS oncogene family                                                           |
| 1,411275843 | 0,00588 | 1,220946513 | 0,04733 | RAB3A   | RAB3A, member RAS oncogene family                                                            |
| 0,582366793 | 0,00176 | 0,709070018 | 0,00023 | RAB3D   | RAB3D, member RAS oncogene family                                                            |
| 0,669891801 | 0,00588 | 0,837987135 | 0,03    | RAB3IP  | RAB3A interacting protein (rabin3)                                                           |
| 0,610050255 | 0,00745 | 0,758383773 | 0,0006  | RAB40C  | RAB40C, member RAS oncogene family                                                           |
| 0,749499801 | 0,04972 | 0,683967652 | 0       | RAB4A   | RAB4A, member RAS oncogene family                                                            |
| 0,612168196 | 0,00771 | 0,787853886 | 0,00487 | RAB5A   | RAB5A, member RAS oncogene family                                                            |
| 1,341642225 | 0,02479 | 1,293248932 | 0,00173 | RAB5C   | RAB5C, member RAS oncogene family                                                            |
| 1,459020344 | 0,01508 | 1,347233577 | 0,00231 | RAB7L1  | RAB7, member RAS oncogene family-like 1                                                      |
| 1,30224419  | 0,03493 | 1,25962998  | 0,00207 | RAB8B   | RAB8B, member RAS oncogene family                                                            |
| 0,657927263 | 0,00747 | 0,783497187 | 0,01168 | RAB9A   | RAB9A, member RAS oncogene family                                                            |
| 0,71548826  | 0,00138 | 0,866937564 | 0,00843 | RABIF   | RAB interacting factor                                                                       |

|             |         |             |         |          |                                                                                         |
|-------------|---------|-------------|---------|----------|-----------------------------------------------------------------------------------------|
| 0,732550437 | 0,03417 | 0,780786493 | 0,00855 | RABL3    | RAB, member of RAS oncogene family-like 3                                               |
| 2,171963713 | 0,00607 | 2,093620564 | 0,00052 | RAC2     | ras-related C3 botulinum toxin substrate 2 (rho family, small GTP binding protein Rac2) |
| 2,291035796 | 0,00001 | 2,034959384 | 0,00001 | RAC2     | ras-related C3 botulinum toxin substrate 2 (rho family, small GTP binding protein Rac2) |
| 0,695440986 | 0,01995 | 0,855002178 | 0,00796 | RAD23B   | RAD23 homolog B ( <i>S. cerevisiae</i> )                                                |
| 0,667574152 | 0,00094 | 0,720964436 | 0,00001 | RAE1     | RAE1 RNA export 1 homolog ( <i>S. pombe</i> )                                           |
| 0,497924877 | 0,00179 | 0,695440986 | 0,00644 | RAET1E   | retinoic acid early transcript 1E                                                       |
| 0,587638164 | 0,00061 | 0,708578698 | 0,00007 | RALA     | v-ral simian leukemia viral oncogene homolog A (ras related)                            |
| 0,671751713 | 0,02676 | 0,745872013 | 0       | RALA     | v-ral simian leukemia viral oncogene homolog A (ras related)                            |
| 0,680185426 | 0,01641 | 0,85797053  | 0,01031 | RALBP1   | ralA binding protein 1                                                                  |
| 0,491410299 | 0,01282 | 0,653835674 | 0,00007 | RALGAPA1 | Ral GTPase activating protein, alpha subunit 1 (catalytic)                              |
| 0,516199268 | 0,01132 | 0,660669203 | 0,00078 | RALGAPA1 | Ral GTPase activating protein, alpha subunit 1 (catalytic)                              |
| 0,635075491 | 0,03979 | 0,711531731 | 0,0002  | RALGAPA1 | Ral GTPase activating protein, alpha subunit 1 (catalytic)                              |
| 0,618995145 | 0,00256 | 0,775930854 | 0,00103 | RALGAPA1 | Ral GTPase activating protein, alpha subunit 1 (catalytic)                              |
| 0,709070018 | 0,02585 | 0,802737389 | 0,01358 | RALGAPB  | Ral GTPase activating protein, beta subunit (non-catalytic)                             |
| 0,743291492 | 0,0412  | 0,870550563 | 0,02512 | RALGAPB  | Ral GTPase activating protein, beta subunit (non-catalytic)                             |
| 1,28788163  | 0,02348 | 1,151887642 | 0,0095  | RALGPS1  | Ral GEF with PH domain and SH3 binding motif 1                                          |
| 0,599985691 | 0,00131 | 0,721464343 | 0,00007 | RALGPS2  | Ral GEF with PH domain and SH3 binding motif 2                                          |
| 1,453972517 | 0,01413 | 1,441928871 | 0,00255 | RAMP2    | receptor (G protein-coupled) activity modifying protein 2                               |
| 1,587767862 | 0,00909 | 1,736280455 | 0       | RAMP3    | receptor (G protein-coupled) activity modifying protein 3                               |
| 0,527411159 | 0,03561 | 0,779704843 | 0,00702 | RAN      | RAN, member RAS oncogene family                                                         |
| 0,610896551 | 0,0156  | 0,746906729 | 0,00015 | RANBP2   | RAN binding protein 2                                                                   |
| 0,583983697 | 0,0246  | 0,719965659 | 0,02474 | RANBP9   | RAN binding protein 9                                                                   |
| 0,62981499  | 0,02299 | 0,61985385  | 0,00224 | RANBP9   | RAN binding protein 9                                                                   |
| 0,689680461 | 0,03019 | 0,833931044 | 0,04793 | RANGAP1  | Ran GTPase activating protein 1                                                         |
| 0,572758949 | 0,00933 | 0,684441907 | 0,00001 | RAPGEF5  | Rap guanine nucleotide exchange factor (GEF) 5                                          |
| 0,47237352  | 0,00057 | 0,649769531 | 0,01178 | RAPH1    | Ras association (RalGDS/AF-6) and pleckstrin homology domains 1                         |
| 0,542614686 | 0,0458  | 0,589678296 | 0,0001  | RAPH1    | Ras association (RalGDS/AF-6) and pleckstrin homology domains 1                         |
| 0,556710809 | 0,02383 | 0,555939579 | 0,00004 | RAPH1    | Ras association (RalGDS/AF-6) and pleckstrin homology domains 1                         |
| 1,70408819  | 0,03095 | 1,990319444 | 0,027   | RARA     | retinoic acid receptor, alpha                                                           |
| 2,187070915 | 0,00183 | 1,563739286 | 0       | RARB     | retinoic acid receptor, beta                                                            |
| 1,286097483 | 0,02616 | 1,45296505  | 0,00003 | RARB     | retinoic acid receptor, beta                                                            |
| 1,638073396 | 0,03705 | 1,316766922 | 0,02888 | RARRES1  | retinoic acid receptor responder (tazarotene induced) 1                                 |
| 1,706452196 | 0,02763 | 1,772763398 | 0,00001 | RARRES2  | retinoic acid receptor responder (tazarotene induced) 2                                 |
| 0,648419777 | 0,01363 | 0,860352631 | 0,00063 | RARS     | arginyl-tRNA synthetase                                                                 |
| 0,774855931 | 0,03557 | 0,874784765 | 0,00189 | RARS2    | arginyl-tRNA synthetase 2, mitochondrial                                                |
| 1,271031689 | 0,04973 | 1,191682575 | 0,03154 | RASA3    | RAS p21 protein activator 3                                                             |
| 0,50768305  | 0,00058 | 0,607939642 | 0,00002 | RASAL2   | RAS protein activator like 2                                                            |
| 0,639492791 | 0,01313 | 0,610050255 | 0,00115 | RASAL2   | RAS protein activator like 2                                                            |
| 1,447938172 | 0,00245 | 1,564823563 | 0,00063 | RASD2    | RASD family, member 2                                                                   |
| 1,296839555 | 0,01657 | 1,30224419  | 0,00345 | RASGRP2  | RAS guanyl releasing protein 2 (calcium and DAG-regulated)                              |
| 1,508380077 | 0,00135 | 1,249196126 | 0,02603 | RASGRP2  | RAS guanyl releasing protein 2 (calcium and DAG-regulated)                              |
| 1,795020101 | 0,00005 | 1,365093718 | 0,00619 | RASGRP3  | RAS guanyl releasing protein 3 (calcium and DAG-regulated)                              |
| 1,480413298 | 0,00115 | 1,43296165  | 0,00008 | RASL12   | RAS-like, family 12                                                                     |
| 1,840375301 | 0,00005 | 1,43893358  | 0,00363 | RASSF2   | Ras association (RalGDS/AF-6) domain family member 2                                    |
| 1,51887169  | 0,00026 | 1,45195828  | 0,00002 | RASSF4   | Ras association (RalGDS/AF-6) domain family member 4                                    |
| 1,853176124 | 0,00981 | 1,888184838 | 0,00002 | RASSF4   | Ras association (RalGDS/AF-6) domain family member 4                                    |
| 1,45195828  | 0,03308 | 1,422077411 | 0,00038 | RASSF4   | Ras association (RalGDS/AF-6) domain family member 4                                    |
| 2,768299432 | 0,00119 | 1,888184838 | 0,0027  | RASSF6   | Ras association (RalGDS/AF-6) domain family member 6                                    |
| 2,465704651 | 0,0004  | 1,808758755 | 0,0003  | RASSF6   | Ras association (RalGDS/AF-6) domain family member 6                                    |
| 1,929196369 | 0,0028  | 1,594384953 | 0,00241 | RASSF6   | Ras association (RalGDS/AF-6) domain family member 6                                    |
| 1,170398641 | 0,03601 | 1,118837101 | 0,01519 | RASSF8   | Ras association (RalGDS/AF-6) domain family (N-terminal) member 8                       |
| 0,714001199 | 0,00528 | 0,770571108 | 0,00955 | RBBP9    | retinoblastoma binding protein 9                                                        |
| 0,726986259 | 0,02767 | 0,878430468 | 0,01339 | RBM15B   | RNA binding motif protein 15B                                                           |
| 0,459775023 | 0,00661 | 0,554784736 | 0,00001 | RBM25    | RNA binding motif protein 25                                                            |
| 0,791137301 | 0,04646 | 0,778624691 | 0,01198 | RBM41    | RNA binding motif protein 41                                                            |
| 0,690158677 | 0,01094 | 0,713012859 | 0,00008 | RBM8A    | RNA binding motif protein 8A                                                            |
| 1,264879542 | 0,0154  | 1,234562607 | 0,00056 | RBMS2    | RNA binding motif, single stranded interacting protein 2                                |
| 1,266634254 | 0,02756 | 1,221793102 | 0,00252 | RBP5     | retinol binding protein 5, cellular                                                     |
| 1,720705261 | 0,00525 | 1,277213759 | 0,00053 | RBPMS    | RNA binding protein with multiple splicing                                              |
| 0,614719434 | 0,02907 | 0,632878297 | 0,00031 | RCAN3    | RCAN family member 3                                                                    |
| 0,636397468 | 0,04599 | 0,712518807 | 0,0005  | RCOR1    | REST corepressor 1                                                                      |
| 2,441893025 | 0,00001 | 1,840375301 | 0,00003 | RCSD1    | RCSD domain containing 1                                                                |
| 1,557249382 | 0,00371 | 1,455989549 | 0,00088 | RDH10    | retinol dehydrogenase 10 (all-trans)                                                    |
| 0,484980955 | 0,00087 | 0,712518807 | 0,00481 | RDH12    | retinol dehydrogenase 12 (all-trans/9-cis/11-cis)                                       |
| 0,47963206  | 0,00067 | 0,775393206 | 0,01984 | REEP1    | receptor accessory protein 1                                                            |
| 0,65747138  | 0,00102 | 0,819604608 | 0,00136 | REEP4    | receptor accessory protein 4                                                            |
| 1,36983298  | 0,01516 | 1,157490217 | 0,01668 | REM1     | RAS (RAD and GEM)-like GTP-binding 1                                                    |
| 1,354724977 | 0,02851 | 1,218410264 | 0,00941 | RENBP    | renin binding protein                                                                   |
| 1,285206337 | 0,00198 | 1,156688184 | 0,01687 | REPIN1   | replication initiator 1                                                                 |
| 0,807201075 | 0,04571 | 0,819036698 | 0,00127 | REPS1    | RALBP1 associated Eps domain containing 1                                               |
| 0,641268301 | 0,01328 | 0,827023368 | 0,00743 | RFC2     | replication factor C (activator 1) 2, 40kDa                                             |
| 0,668500248 | 0,02463 | 0,837406488 | 0,00273 | RFC2     | replication factor C (activator 1) 2, 40kDa                                             |
| 0,725476104 | 0,03054 | 0,846158597 | 0,01104 | RFC4     | replication factor C (activator 1) 4, 37kDa                                             |
| 1,295042999 | 0,04369 | 1,158292806 | 0,03325 | RFTN1    | raftlin, lipid raft linker 1                                                            |
| 0,637280314 | 0,03007 | 0,738669032 | 0,00003 | RG9MTD1  | RNA (guanine-9-) methyltransferase domain containing 1                                  |
| 0,687770909 | 0,009   | 0,756808396 | 0,00027 | RGNEF    | 190 kDa guanine nucleotide exchange factor                                              |
| 0,483303049 | 0,00035 | 0,728499557 | 0,0017  | RGNEF    | 190 kDa guanine nucleotide exchange factor                                              |
| 0,614719434 | 0,00011 | 0,743806881 | 0,00103 | RGNEF    | 190 kDa guanine nucleotide exchange factor                                              |
| 0,514413354 | 0,00009 | 0,719965659 | 0,00055 | RGNEF    | 190 kDa guanine nucleotide exchange factor                                              |
| 5,856342784 | 0,00005 | 3,1777376   | 0,00001 | RGS1     | regulator of G-protein signaling 1                                                      |
| 5,637283021 | 0,00002 | 2,709449955 | 0       | RGS1     | regulator of G-protein signaling 1                                                      |
| 0,601234624 | 0,01827 | 0,801069878 | 0,00485 | RGS12    | regulator of G-protein signaling 12                                                     |
| 0,567227742 | 0,00269 | 0,738157203 | 0,00649 | RGS12    | regulator of G-protein signaling 12                                                     |
| 0,833931044 | 0,03094 | 0,839731493 | 0,01065 | RGS14    | regulator of G-protein signaling 14                                                     |
| 1,414213562 | 0,01178 | 1,396678532 | 0,00061 | RGS16    | regulator of G-protein signaling 16                                                     |
| 2,401606855 | 0,0005  | 1,399585866 | 0,00232 | RGS18    | regulator of G-protein signaling 18                                                     |
| 2,416635687 | 0,00008 | 1,53900722  | 0,02384 | RGS2     | regulator of G-protein signaling 2, 24kDa                                               |
| 0,454074209 | 0,00274 | 0,517632462 | 0       | RGS20    | regulator of G-protein signaling 20                                                     |
| 1,43097652  | 0,03613 | 1,366040257 | 0,00201 | RGS3     | regulator of G-protein signaling 3                                                      |
| 1,21335356  | 0,04848 | 1,125058485 | 0,04974 | RGS3     | regulator of G-protein signaling 3                                                      |
| 2,294214048 | 0,03664 | 2,469125214 | 0,00003 | RGS4     | regulator of G-protein signaling 4                                                      |
| 1,617762697 | 0,01183 | 1,516767545 | 0,00205 | RGS5     | regulator of G-protein signaling 5                                                      |
| 1,300440147 | 0,00539 | 1,22603486  | 0,04433 | RHBDD1   | rhomboid domain containing 1                                                            |
| 1,429984986 | 0,01974 | 1,341642225 | 0,00015 | RHBDD1   | rhomboid domain containing 1                                                            |
| 1,2397077   | 0,02171 | 1,180174343 | 0,00544 | RHBDL3   | rhomboid, veinlet-like 3 ( <i>Drosophila</i> )                                          |
| 1,308578071 | 0,00535 | 1,160703914 | 0,02931 | RHD      | Rh blood group, D antigen                                                               |
| 1,341642225 | 0,0007  | 1,257884972 | 0,0003  | RHEBL1   | Ras homolog enriched in brain like 1                                                    |
| 1,230291345 | 0,03863 | 1,183451022 | 0,01835 | RHOBTB2  | Rho-related BTB domain containing 2                                                     |

|             |         |             |         |         |                                                                        |
|-------------|---------|-------------|---------|---------|------------------------------------------------------------------------|
| 1,42899414  | 0,01665 | 1,519924856 | 0,00001 | RHOF    | ras homolog gene family, member F (in filopodia)                       |
| 1,607701981 | 0,00102 | 1,502119927 | 0,00011 | RHOF    | ras homolog gene family, member F (in filopodia)                       |
| 1,759298152 | 0,00575 | 1,74956953  | 0       | RHOH    | ras homolog gene family, member H                                      |
| 3,950403446 | 0,00024 | 2,606294299 | 0       | RHOH    | ras homolog gene family, member H                                      |
| 1,387030969 | 0,03962 | 1,374588696 | 0,01633 | RHOJ    | ras homolog gene family, member J                                      |
| 1,577893682 | 0,0002  | 1,242288282 | 0,00279 | RILPL2  | Rab interacting lysosomal protein-like 2                               |
| 1,28788163  | 0,02488 | 1,128964405 | 0,03439 | RIMBP2  | RIMS binding protein 2                                                 |
| 0,483973513 | 0,00038 | 0,636838738 | 0,00001 | RIMS3   | regulating synaptic membrane exocytosis 3                              |
| 0,431669779 | 0,0223  | 0,692554734 | 0,00644 | RIOK3   | RIO kinase 3 (yeast)                                                   |
| 0,748461493 | 0,00922 | 0,790041312 | 0,00107 | RMND1   | required for meiotic nuclear division 1 homolog (S. cerevisiae)        |
| 0,689202576 | 0,02238 | 0,762072415 | 0,01493 | RMND5A  | required for meiotic nuclear division 5 homolog A (S. cerevisiae)      |
| 1,257884972 | 0,00653 | 1,179356592 | 0,01557 | RNASE2  | ribonuclease, RNase A family, 2 (liver, eosinophil-derived neurotoxin) |
| 1,884262548 | 0,00007 | 1,971098674 | 0,00015 | RNASE6  | ribonuclease, RNase A family, k6                                       |
| 1,51887169  | 0,03746 | 1,505246747 | 0,00004 | RNASET2 | ribonuclease T2                                                        |
| 0,763129604 | 0,02054 | 0,786217292 | 0,01097 | RNF103  | ring finger protein 103                                                |
| 1,447938172 | 0,00916 | 1,144724161 | 0,03699 | RNF121  | ring finger protein 121                                                |
| 0,600401714 | 0,01584 | 0,814507563 | 0,03952 | RNF126  | ring finger protein 126                                                |
| 0,689680461 | 0,00016 | 0,771105413 | 0,02255 | RNF141  | ring finger protein 141                                                |
| 1,825130977 | 0,00004 | 1,5888688   | 0,00022 | RNF166  | ring finger protein 166                                                |
| 1,397646972 | 0,00417 | 1,325007017 | 0,00262 | RNF181  | ring finger protein 181                                                |
| 0,726986259 | 0,0406  | 0,790589117 | 0,00099 | RNF20   | ring finger protein 20                                                 |
| 1,2397077   | 0,0095  | 1,158292806 | 0,01098 | RNF216  | ring finger protein 216                                                |
| 0,699792933 | 0,01237 | 0,823591017 | 0,00251 | RNF7    | ring finger protein 7                                                  |
| 0,595015848 | 0,00906 | 0,792784137 | 0,00136 | RNF8    | ring finger protein 8                                                  |
| 0,744838732 | 0,00291 | 0,868140228 | 0,00512 | ROBO2   | roundabout, axon guidance receptor, homolog 2 (Drosophila)             |
| 1,249196126 | 0,03315 | 1,164733586 | 0,04866 | ROBO4   | roundabout homolog 4, magic roundabout (Drosophila)                    |
| 1,310393404 | 0,02406 | 1,209994089 | 0,03867 | ROBO4   | roundabout homolog 4, magic roundabout (Drosophila)                    |
| 0,62981499  | 0,02366 | 0,844400887 | 0,02031 | ROCK2   | Rho-associated, coiled-coil containing protein kinase 2                |
| 0,62676651  | 0,00617 | 0,752101876 | 0,00005 | ROD1    | ROD1 regulator of differentiation 1 (S. pombe)                         |
| 0,624598063 | 0,00875 | 0,765248385 | 0,00516 | ROD1    | ROD1 regulator of differentiation 1 (S. pombe)                         |
| 0,288971677 | 0,00015 | 0,464258426 | 0,00002 | RORA    | RAR-related orphan receptor A                                          |
| 0,266646445 | 0,0001  | 0,43077308  | 0,00001 | RORA    | RAR-related orphan receptor A                                          |
| 0,335178148 | 0,00353 | 0,496890547 | 0,00015 | RORA    | RAR-related orphan receptor A                                          |
| 0,346037429 | 0,00489 | 0,478967609 | 0,00008 | RORA    | RAR-related orphan receptor A                                          |
| 0,394746943 | 0,01158 | 0,579146403 | 0,00017 | RORA    | RAR-related orphan receptor A                                          |
| 0,699792933 | 0,0355  | 0,756283999 | 0,03758 | RORA    | RAR-related orphan receptor A                                          |
| 0,691595315 | 0,01727 | 0,784584098 | 0,02055 | RPA1    | replication protein A1, 70kDa                                          |
| 0,698339266 | 0,00085 | 0,824733549 | 0,00176 | RPAIN   | RPA interacting protein                                                |
| 0,765248385 | 0,02764 | 0,864537231 | 0,04328 | RPAP2   | RNA polymerase II associated protein 2                                 |
| 0,562139462 | 0,00022 | 0,687294348 | 0,00001 | RPF1    | ribosome production factor 1 homolog (S. cerevisiae)                   |
| 0,65747138  | 0,00466 | 0,767905135 | 0,00003 | RPF2    | ribosome production factor 2 homolog (S. cerevisiae)                   |
| 0,780786493 | 0,00257 | 0,898755127 | 0,03686 | RPL10A  | ribosomal protein L10a                                                 |
| 0,500693628 | 0,03498 | 0,862143545 | 0,00878 | RPL11   | ribosomal protein L11                                                  |
| 0,817335328 | 0,01718 | 0,906261938 | 0,01892 | RPL12   | ribosomal protein L12                                                  |
| 0,819036698 | 0,02599 | 0,883315051 | 0,01245 | RPL15   | ribosomal protein L15                                                  |
| 1,164733586 | 0,04014 | 1,153485605 | 0,02444 | RPL18   | ribosomal protein L18                                                  |
| 0,730522189 | 0,01644 | 0,908148418 | 0,01557 | RPL22   | ribosomal protein L22                                                  |
| 0,51015233  | 0,00096 | 0,828170661 | 0,00247 | RPL22   | ribosomal protein L22                                                  |
| 0,773246337 | 0,02152 | 0,923382311 | 0,0492  | RPL22   | ribosomal protein L22                                                  |
| 0,651573575 | 0,00293 | 0,857376037 | 0,00789 | RPL22   | ribosomal protein L22                                                  |
| 0,73153561  | 0,0147  | 0,901875378 | 0,01262 | RPL22   | ribosomal protein L22                                                  |
| 0,751059963 | 0,04187 | 0,739693755 | 0,00001 | RPL22L1 | ribosomal protein L22-like 1                                           |
| 0,680657058 | 0,02947 | 0,844986384 | 0,00045 | RPL26L1 | ribosomal protein L26-like 1                                           |
| 0,567227742 | 0,00405 | 0,681601304 | 0       | RPL35A  | ribosomal protein L35a                                                 |
| 0,855595026 | 0,02933 | 0,87175824  | 0,00031 | RPL37   | ribosomal protein L37                                                  |
| 0,73153561  | 0,00214 | 0,720464874 | 0,00361 | RPL37   | ribosomal protein L37                                                  |
| 0,501040803 | 0,01073 | 0,622437118 | 0,00026 | RPL37   | ribosomal protein L37                                                  |
| 1,31494276  | 0,04929 | 1,154285418 | 0,02515 | RPL39L  | ribosomal protein L39-like                                             |
| 0,784040454 | 0,01896 | 0,8962667   | 0,02045 | RPL5    | ribosomal protein L5                                                   |
| 0,727994774 | 0,02694 | 0,813943185 | 0,00033 | RPL7L1  | ribosomal protein L7-like 1                                            |
| 1,382232207 | 0,00308 | 1,424050196 | 0,00022 | RPN2    | ribophorin II                                                          |
| 1,316766922 | 0,01279 | 1,395710764 | 0,00061 | RPN2    | ribophorin II                                                          |
| 0,774319028 | 0,01888 | 0,795536484 | 0,0001  | RPP14   | ribonuclease P/MRP 14kDa subunit                                       |
| 0,720464874 | 0,03936 | 0,839731493 | 0,0016  | RPP38   | ribonuclease P/MRP 38kDa subunit                                       |
| 0,707106781 | 0,00455 | 0,729510172 | 0,00001 | RPP40   | ribonuclease P/MRP 40kDa subunit                                       |
| 1,318593614 | 0,01757 | 1,232852325 | 0,01045 | RPRD2   | regulation of nuclear pre-mRNA domain containing 2                     |
| 0,752101876 | 0,01416 | 0,693515485 | 0,00051 | RPS21   | ribosomal protein S21                                                  |
| 0,717972255 | 0,00982 | 0,773782497 | 0,00569 | RPS27A  | ribosomal protein S27a                                                 |
| 0,751059963 | 0,01458 | 0,829319546 | 0,00325 | RPS4Y1  | ribosomal protein S4, Y-linked 1                                       |
| 1,255271991 | 0,04754 | 1,306765254 | 0,00005 | RPS6KA2 | ribosomal protein S6 kinase, 90kDa, polypeptide 2                      |
| 1,399585866 | 0,03101 | 1,392811481 | 0,00137 | RPS6KA2 | ribosomal protein S6 kinase, 90kDa, polypeptide 2                      |
| 0,268873598 | 0,00119 | 0,464258426 | 0,03409 | RPTN    | repetin                                                                |
| 0,840313752 | 0,03876 | 0,748461493 | 0,00046 | RPUSD3  | RNA pseudouridylylase synthase domain containing 3                     |
| 0,549046407 | 0,01514 | 0,786762445 | 0,00631 | RRAGC   | Ras-related GTP binding C                                              |
| 0,715984371 | 0,04127 | 0,788946841 | 0,00027 | RRAGC   | Ras-related GTP binding C                                              |
| 0,47204621  | 0,003   | 0,729510172 | 0,00019 | RRAGD   | Ras-related GTP binding D                                              |
| 0,594603558 | 0,0169  | 0,807201075 | 0,0042  | RRM1    | ribonucleotide reductase M1                                            |
| 0,711038705 | 0,04694 | 0,686342216 | 0,00018 | RRN3    | RRN3 RNA polymerase I transcription factor homolog (S. cerevisiae)     |
| 0,762600827 | 0,03145 | 0,763129604 | 0,00025 | RRS1    | RRS1 ribosome biogenesis regulator homolog (S. cerevisiae)             |
| 0,622868708 | 0,04364 | 0,790041312 | 0,00654 | RSF1    | remodeling and spacing factor 1                                        |
| 0,480630464 | 0,02911 | 0,785128119 | 0,00006 | RSL1D1  | ribosomal L1 domain containing 1                                       |
| 1,354724977 | 0,00187 | 1,147107024 | 0,01927 | RSPO3   | R-spondin 3                                                            |
| 0,709070018 | 0,0324  | 0,775393206 | 0,00216 | RTCD1   | RNA terminal phosphate cyclase domain 1                                |
| 0,753667455 | 0,04426 | 0,79774524  | 0,02451 | RUFY2   | RUN and FYVE domain containing 2                                       |
| 0,637722196 | 0,00461 | 0,72597914  | 0,00065 | RUFY3   | RUN and FYVE domain containing 3                                       |
| 0,537002236 | 0,02238 | 0,630688704 | 0,00002 | RUFY3   | RUN and FYVE domain containing 3                                       |
| 1,512567997 | 0,00767 | 1,315854525 | 0,00062 | RUNX1   | runt-related transcription factor 1                                    |
| 1,380317353 | 0,02749 | 1,469168633 | 0,00001 | RUNX3   | runt-related transcription factor 3                                    |
| 0,696888619 | 0,03309 | 0,844400887 | 0,00476 | RUSC1   | RUN and SH3 domain containing 1                                        |
| 0,710053679 | 0,01659 | 0,76630998  | 0       | RWDD1   | RWD domain containing 1                                                |
| 1,4063932   | 0,00343 | 1,246601194 | 0,00738 | RWDD2A  | RWD domain containing 2A                                               |
| 0,672683604 | 0,00653 | 0,752623374 | 0,00369 | S100A3  | S100 calcium binding protein A3                                        |
| 1,512567997 | 0,00387 | 1,315854525 | 0,00132 | S1PR1   | sphingosine-1-phosphate receptor 1                                     |
| 1,271031689 | 0,01513 | 1,21335356  | 0,00646 | S1PR4   | sphingosine-1-phosphate receptor 4                                     |
| 1,584469622 | 0,01003 | 1,45296505  | 0,00004 | SAA4    | serum amyloid A4, constitutive                                         |
| 0,668037039 | 0,04256 | 0,633317127 | 0,00666 | SAMD9   | sterile alpha motif domain containing 9                                |
| 1,500038989 | 0,02734 | 1,244011653 | 0,02993 | SAMD9L  | sterile alpha motif domain containing 9-like                           |
| 2,187070915 | 0,00009 | 1,491744027 | 0,01923 | SAMSN1  | SAM domain, SH3 domain and nuclear localization signals 1              |

|             |         |             |         |           |                                                                                        |
|-------------|---------|-------------|---------|-----------|----------------------------------------------------------------------------------------|
| 2,830388321 | 0,00089 | 1,742308384 | 0,0102  | SAMSN1    | SAM domain, SH3 domain and nuclear localization signals 1                              |
| 0,517632462 | 0,00023 | 0,642157904 | 0       | SAP18     | Sin3A-associated protein, 18kDa                                                        |
| 0,595428425 | 0,00363 | 0,765248385 | 0,00005 | SAP30L    | SAP30-like                                                                             |
| 0,643940815 | 0,01389 | 0,798298386 | 0,00087 | SARNP     | SAP domain containing ribonucleoprotein                                                |
| 0,655651007 | 0,02592 | 0,683020128 | 0,00195 | SASH1     | SAM and SH3 domain containing 1                                                        |
| 2,122846418 | 0,00102 | 2,009727641 | 0,00002 | SASH3     | SAM and SH3 domain containing 3                                                        |
| 1,348167732 | 0,01807 | 1,202469249 | 0,00227 | SAT1      | spermidine/spermine N1-acetyltransferase 1                                             |
| 0,579949827 | 0,04624 | 0,79774524  | 0,00314 | SAV1      | salvador homolog 1 (Drosophila)                                                        |
| 0,649769531 | 0,02633 | 0,704172113 | 0,00076 | SBF2      | SET binding factor 2                                                                   |
| 0,456599125 | 0,02642 | 0,78024548  | 0,01026 | SBSN      | suprabasin                                                                             |
| 0,61985385  | 0,0308  | 0,716977624 | 0,00047 | SCAF11    | SR-related CTD-associated factor 11                                                    |
| 0,776468875 | 0,03956 | 0,891310496 | 0,0256  | SCAF11    | SR-related CTD-associated factor 11                                                    |
| 0,706127202 | 0,00741 | 0,808320869 | 0,00358 | SCAF4     | SR-related CTD-associated factor 4                                                     |
| 0,72597914  | 0,04947 | 0,843815796 | 0,00943 | SCAMP1    | secretory carrier membrane protein 1                                                   |
| 1,851892045 | 0,00267 | 1,777685362 | 0       | SCAMP5    | secretory carrier membrane protein 5                                                   |
| 1,390881972 | 0,04843 | 1,502119927 | 0,00014 | SCARB1    | scavenger receptor class B, member 1                                                   |
| 1,409320755 | 0,02685 | 1,52414483  | 0,00001 | SCARB1    | scavenger receptor class B, member 1                                                   |
| 1,274560627 | 0,04836 | 1,271031689 | 0,00018 | SCCPDH    | saccharopine dehydrogenase (putative)                                                  |
| 0,618566239 | 0,02462 | 0,580754366 | 0       | SCD       | stearoyl-CoA desaturase (delta-9-desaturase)                                           |
| 0,517273791 | 0,00749 | 0,47237352  | 0       | SCD       | stearoyl-CoA desaturase (delta-9-desaturase)                                           |
| 1,416175438 | 0,02173 | 1,294145654 | 0,01269 | SCD5      | stearoyl-CoA desaturase 5                                                              |
| 0,579547976 | 0,02702 | 0,744322628 | 0,04205 | SCEL      | sciellin                                                                               |
| 1,25092908  | 0,02233 | 1,176906737 | 0,01078 | SCG5      | secretogranin V (7B2 protein)                                                          |
| 0,612168196 | 0,00842 | 0,679243142 | 0,04354 | SCIN      | scinderin                                                                              |
| 0,605416542 | 0,00478 | 0,775393206 | 0,00679 | SCIN      | scinderin                                                                              |
| 1,314031627 | 0,01565 | 1,194163187 | 0,0195  | SCLY      | selenocysteine lyase                                                                   |
| 1,304954948 | 0,01907 | 1,209994089 | 0,02    | SCN1B     | sodium channel, voltage-gated, type I, beta                                            |
| 1,215036792 | 0,02133 | 1,191682575 | 0,01725 | SCN4A     | sodium channel, voltage-gated, type IV, alpha subunit                                  |
| 1,376495602 | 0,00504 | 1,132098902 | 0,04164 | SCN8A     | sodium channel, voltage gated, type VIII, alpha subunit                                |
| 0,545253866 | 0,00004 | 0,773246337 | 0,03685 | SCNN1B    | sodium channel, nonvoltage-gated 1, beta                                               |
| 0,709561678 | 0,00304 | 0,673616788 | 0,00061 | SCNN1G    | sodium channel, nonvoltage-gated 1, gamma                                              |
| 0,652025368 | 0,03145 | 0,759435845 | 0,0132  | SCP2      | sterol carrier protein 2                                                               |
| 1,383190629 | 0,04258 | 1,255271991 | 0,00429 | SCPEP1    | serine carboxypeptidase 1                                                              |
| 0,789493887 | 0,01741 | 0,767905135 | 0,00019 | SCRIB     | scribbled homolog (Drosophila)                                                         |
| 1,374588696 | 0,03111 | 1,353786279 | 0,00008 | SCUBE2    | signal peptide, CUB domain, EGF-like 2                                                 |
| 0,567227742 | 0,00829 | 0,7031966   | 0,00156 | SDR16C5   | short chain dehydrogenase/reductase family 16C, member 5                               |
| 0,743806881 | 0,03479 | 0,803850991 | 0,00004 | SDR42E1   | short chain dehydrogenase/reductase family 42E, member 1                               |
| 0,334250124 | 0,00206 | 0,501388218 | 0,00874 | SDR9C7    | short chain dehydrogenase/reductase family 9C, member 7                                |
| 1,685293659 | 0,02537 | 1,775222675 | 0,00022 | SEC11C    | SEC11 homolog C (S. cerevisiae)                                                        |
| 1,771535038 | 0,04617 | 1,215036792 | 0,04263 | SEC14L1   | SEC14-like 1 (S. cerevisiae)                                                           |
| 2,292624371 | 0,00003 | 1,611048582 | 0,00235 | SEC14L1   | SEC14-like 1 (S. cerevisiae)                                                           |
| 1,72428709  | 0,00002 | 1,29056249  | 0,00234 | SEC14L1   | SEC14-like 1 (S. cerevisiae)                                                           |
| 0,695923196 | 0,04103 | 0,661127303 | 0,00159 | SEC22C    | SEC22 vesicle trafficking protein homolog C (S. cerevisiae)                            |
| 1,70408819  | 0,00978 | 1,295042999 | 0,01536 | SEC24A    | SEC24 family, member A (S. cerevisiae)                                                 |
| 1,697015803 | 0,00033 | 1,245737416 | 0,02257 | SEC24A    | SEC24 family, member A (S. cerevisiae)                                                 |
| 1,470187336 | 0,01321 | 1,312211255 | 0,00614 | SEC24D    | SEC24 family, member D (S. cerevisiae)                                                 |
| 1,725482689 | 0,01629 | 1,294145654 | 0,00153 | SEC62     | SEC62 homolog (S. cerevisiae)                                                          |
| 1,413233644 | 0,02746 | 1,350974085 | 0,00013 | SECTM1    | secreted and transmembrane 1                                                           |
| 0,777007269 | 0,03883 | 0,732550437 | 0,01192 | SEH1L     | SEH1-like (S. cerevisiae)                                                              |
| 1,93053405  | 0,00015 | 1,688801775 | 0,00096 | SEL1L     | sel-1 suppressor of lin-12-like (C. elegans)                                           |
| 1,905275996 | 0,03887 | 1,517819253 | 0,00832 | SEL1L     | sel-1 suppressor of lin-12-like (C. elegans)                                           |
| 2,314980434 | 0,00005 | 1,602139755 | 0,0014  | SEL1L     | sel-1 suppressor of lin-12-like (C. elegans)                                           |
| 1,972465409 | 0,00013 | 1,695839929 | 0,00032 | SEL1L     | sel-1 suppressor of lin-12-like (C. elegans)                                           |
| 2,720741705 | 0,00073 | 3,166743463 | 0,00001 | SEL1L3    | sel-1 suppressor of lin-12-like 3 (C. elegans)                                         |
| 3,224331326 | 0,00002 | 3,016760153 | 0,00008 | SEL1L3    | sel-1 suppressor of lin-12-like 3 (C. elegans)                                         |
| 1,623379162 | 0,00022 | 1,388955136 | 0,00086 | SEL1L3    | sel-1 suppressor of lin-12-like 3 (C. elegans)                                         |
| 2,099433367 | 0,00051 | 1,74956953  | 0,00436 | SELE      | selectin E                                                                             |
| 2,785622961 | 0,00002 | 2,034959384 | 0,00074 | SELL      | selectin L                                                                             |
| 1,830198336 | 0,03022 | 2,077718207 | 0       | SELM      | selenoprotein M                                                                        |
| 1,86735989  | 0       | 1,733875127 | 0       | SELP      | selectin P [granule membrane protein 140kDa, antigen CD62]                             |
| 1,855746953 | 0,00009 | 1,599920257 | 0,00003 | SELPLG    | selectin P ligand                                                                      |
| 0,803293997 | 0,03783 | 0,833353207 | 0,00355 | SELR1     | Sel1 repeat containing 1                                                               |
| 0,69495911  | 0,0196  | 0,734075318 | 0,00014 | SELR1     | Sel1 repeat containing 1                                                               |
| 0,642157904 | 0,00012 | 0,843815796 | 0,01147 | SEMA3F    | sema domain, immunoglobulin domain (Ig), short basic domain, secreted, (semaphorin) 3F |
| 1,365093718 | 0,02933 | 1,388955136 | 0,00022 | SEMA6D    | sema domain, transmembrane domain (TM), and cytoplasmic domain, (semaphorin) 6D        |
| 1,754427097 | 0,02358 | 1,557249382 | 0,00096 | SEMA6D    | sema domain, transmembrane domain (TM), and cytoplasmic domain, (semaphorin) 6D        |
| 0,862741345 | 0,04261 | 0,84264683  | 0,00866 | SENP3     | SUMO1/sentrin/SMT3 specific peptidase 3                                                |
| 0,774319028 | 0,00902 | 0,796088099 | 0,00158 | SENP8     | SUMO/sentrin specific peptidase family member 8                                        |
| 1,495885758 | 0,00221 | 1,270150983 | 0,00078 | SEPX1     | selenoprotein X, 1                                                                     |
| 0,803293997 | 0,03814 | 0,832198735 | 0,00588 | SERBP1    | SERPINE1 mRNA binding protein 1                                                        |
| 0,718470088 | 0,04391 | 0,762072415 | 0,00009 | SERBP1    | SERPINE1 mRNA binding protein 1                                                        |
| 0,667111585 | 0,04666 | 0,70514898  | 0,00912 | SERBP1    | SERPINE1 mRNA binding protein 1                                                        |
| 0,60583633  | 0,04105 | 0,668963777 | 0,00007 | SERBP1    | SERPINE1 mRNA binding protein 1                                                        |
| 1,368883813 | 0,01501 | 1,266634254 | 0,00088 | SERP1     | stress-associated endoplasmic reticulum protein 1                                      |
| 2,406606052 | 0,00267 | 2,381713699 | 0,00002 | SERPINA1  | serpin peptidase inhibitor, clade A (alpha-1 antitrypsin, antitrypsin), member 1       |
| 1,780151467 | 0,0057  | 1,707635429 | 0,00298 | SERPINA1  | serpin peptidase inhibitor, clade A (alpha-1 antitrypsin, antitrypsin), member 1       |
| 0,320189965 | 0,02105 | 0,504176227 | 0,00036 | SERPINB11 | serpin peptidase inhibitor, clade B (ovalbumin), member 11 (gene/pseudogene)           |
| 0,520150133 | 0,00162 | 0,463294031 | 0,00011 | SERPINB13 | serpin peptidase inhibitor, clade B (ovalbumin), member 13                             |
| 0,451563255 | 0,00091 | 0,692554734 | 0,0019  | SERPINB5  | serpin peptidase inhibitor, clade B (ovalbumin), member 5                              |
| 0,539614118 | 0,04304 | 0,505926601 | 0,01073 | SERPINB6  | serpin peptidase inhibitor, clade B (ovalbumin), member 6                              |
| 0,582770599 | 0,0291  | 0,824733549 | 0,04319 | SERPINB7  | serpin peptidase inhibitor, clade B (ovalbumin), member 7                              |
| 0,566441943 | 0,00069 | 0,672683604 | 0,00008 | SERPINB8  | serpin peptidase inhibitor, clade B (ovalbumin), member 8                              |
| 1,780151467 | 0,0003  | 1,387030969 | 0,00659 | SERPINB9  | serpin peptidase inhibitor, clade B (ovalbumin), member 9                              |
| 1,956126947 | 0,00599 | 1,315854525 | 0,03441 | SERPINB9  | serpin peptidase inhibitor, clade B (ovalbumin), member 9                              |
| 2,156960863 | 0,00392 | 2,059080167 | 0       | SERPINI1  | serpin peptidase inhibitor, clade I (neuroserpin), member 1                            |
| 0,585605091 | 0,03433 | 0,816768991 | 0,00085 | SERTAD2   | SERTA domain containing 2                                                              |
| 0,512989073 | 0,00832 | 0,760489377 | 0,00861 | SERTAD4   | SERTA domain containing 4                                                              |
| 0,598324482 | 0,01686 | 0,669891801 | 0,00017 | SERTAD4   | SERTA domain containing 4                                                              |
| 0,738157203 | 0,04855 | 0,815072332 | 0,00074 | SET       | SET nuclear oncogene                                                                   |
| 0,607518396 | 0,01818 | 0,845572287 | 0,01948 | SETD2     | SET domain containing 2                                                                |
| 0,671751713 | 0,00787 | 0,772175133 | 0,02066 | SETD2     | SET domain containing 2                                                                |
| 0,63860688  | 0,00451 | 0,740206649 | 0,00009 | SETD6     | SET domain containing 6                                                                |
| 0,699308041 | 0,01196 | 0,667574152 | 0,00016 | SETD6     | SET domain containing 6                                                                |
| 0,658383461 | 0,01918 | 0,837987135 | 0,00069 | SETD7     | SET domain containing (lysine methyltransferase) 7                                     |
| 0,551334582 | 0,01842 | 0,749499801 | 0,02046 | SETD8     | SET domain containing (lysine methyltransferase) 8                                     |
| 0,695440986 | 0,03155 | 0,816203046 | 0,00303 | SETD8     | SET domain containing (lysine methyltransferase) 8                                     |
| 0,657927263 | 0,00327 | 0,789493887 | 0,00035 | SETMAR    | SET domain and mariner transposase fusion gene                                         |
| 0,77271055  | 0,02561 | 0,793333843 | 0,0047  | SF3B14    | splicing factor 3B, 14 kDa subunit                                                     |

|             |         |             |         |           |                                                                                         |
|-------------|---------|-------------|---------|-----------|-----------------------------------------------------------------------------------------|
| 2,339175328 | 0,00005 | 1,756860936 | 0,00047 | SFMBT2    | Scm-like with four mbt domains 2                                                        |
| 0,805524291 | 0,02539 | 0,887611337 | 0,00672 | SFN       | stratifin                                                                               |
| 0,76154437  | 0,00653 | 0,84323111  | 0,00063 | SFN       | stratifin                                                                               |
| 3,439025945 | 0,00009 | 2,545589871 | 0,00444 | SFRP4     | secreted frizzled-related protein 4                                                     |
| 2,772139771 | 0,00147 | 2,158456473 | 0,00205 | SFRP4     | secreted frizzled-related protein 4                                                     |
| 0,632439771 | 0,00013 | 0,680657058 | 0       | SGK223    | homolog of rat pragma of Rnd2                                                           |
| 0,652477474 | 0,02668 | 0,746389192 | 0,00886 | SGMS2     | sphingomyelin synthase 2                                                                |
| 0,800514811 | 0,02679 | 0,784584098 | 0,00299 | SGPP2     | sphingosine-1-phosphate phosphatase 2                                                   |
| 1,639209215 | 0,00179 | 1,409320755 | 0,00076 | SH2B3     | SH2B adaptor protein 3                                                                  |
| 1,227735684 | 0,03239 | 1,175276328 | 0,02119 | SH2D1A    | SH2 domain containing 1A                                                                |
| 1,517819253 | 0,00101 | 1,325007017 | 0,00044 | SH2D2A    | SH2 domain containing 2A                                                                |
| 1,420107359 | 0,01833 | 1,53049677  | 0,0002  | SH2D3C    | SH2 domain containing 3C                                                                |
| 1,172022284 | 0,0361  | 1,175276328 | 0,00385 | SH2D3C    | SH2 domain containing 3C                                                                |
| 1,720705261 | 0,00009 | 1,414213562 | 0,00215 | SH2D3C    | SH2 domain containing 3C                                                                |
| 0,685866644 | 0,02734 | 0,827596816 | 0,00164 | SH2D4A    | SH2 domain containing 4A                                                                |
| 0,635956503 | 0,02218 | 0,796088099 | 0,03869 | SH3BGR2L2 | SH3 domain binding glutamic acid-rich protein like 2                                    |
| 0,654742712 | 0,03276 | 0,628942486 | 0,00013 | SH3BP2    | SH3-domain binding protein 2                                                            |
| 0,59295725  | 0,02487 | 0,710546022 | 0,00212 | SH3D19    | SH3 domain containing 19                                                                |
| 0,293819082 | 0,00051 | 0,436786448 | 0,00038 | SH3GL3    | SH3-domain GRB2-like 3                                                                  |
| 0,661127303 | 0,01702 | 0,810003474 | 0,00916 | SH3GLB1   | SH3-domain GRB2-like endophilin B1                                                      |
| 1,705269784 | 0,00022 | 1,620006947 | 0,00044 | SH3KBP1   | SH3-domain kinase binding protein 1                                                     |
| 1,536875181 | 0,00975 | 1,427014506 | 0,00049 | SH3KBP1   | SH3-domain kinase binding protein 1                                                     |
| 1,514666316 | 0,00668 | 1,312211255 | 0,00562 | SH3KBP1   | SH3-domain kinase binding protein 1                                                     |
| 0,602903914 | 0,00222 | 0,805524291 | 0,00539 | SH3PXD2A  | SH3 and PX domains 2A                                                                   |
| 1,231998073 | 0,01968 | 1,32408891  | 0,00048 | SH3PXD2B  | SH3 and PX domains 2B                                                                   |
| 0,740206649 | 0,01718 | 0,857376037 | 0,01061 | SH3RF2    | SH3 domain containing ring finger 2                                                     |
| 0,523405141 | 0,00025 | 0,736113431 | 0,0103  | SH3RF2    | SH3 domain containing ring finger 2                                                     |
| 0,483638165 | 0,00982 | 0,720964436 | 0,00008 | SH3RF2    | SH3 domain containing ring finger 2                                                     |
| 1,21167266  | 0,04731 | 1,092777739 | 0,03047 | SHANK2    | SH3 and multiple ankyrin repeat domains 2                                               |
| 1,631274987 | 0,00025 | 1,488645255 | 0,00191 | SHANK3    | SH3 and multiple ankyrin repeat domains 3                                               |
| 0,71449707  | 0,03254 | 0,738669032 | 0,00016 | SHB       | Src homology 2 domain containing adaptor protein B                                      |
| 1,368883813 | 0,00755 | 1,178539408 | 0,04356 | SHC2      | SHC (Src homology 2 domain containing) transforming protein 2                           |
| 0,59295725  | 0,00662 | 0,880869374 | 0,00981 | SHFM1     | split hand/foot malformation (ectrodactyly) type 1                                      |
| 1,332374825 | 0,02778 | 1,19335743  | 0,00809 | SHMT2     | serine hydroxymethyltransferase 2 (mitochondrial)                                       |
| 0,736623843 | 0,01454 | 0,857376037 | 0,00469 | SHROOM2   | shroom family member 2                                                                  |
| 1,244011653 | 0,00943 | 1,285206337 | 0,0009  | SHROOM4   | shroom family member 4                                                                  |
| 0,723467443 | 0,02485 | 0,707106781 | 0,00079 | SIAH1     | seven in absentia homolog 1 (Drosophila)                                                |
| 0,686342216 | 0,00457 | 0,648419777 | 0,00009 | SIAH1     | seven in absentia homolog 1 (Drosophila)                                                |
| 2,0907202   | 0,00002 | 1,455989549 | 0,00233 | SIDT1     | SID1 transmembrane family, member 1                                                     |
| 1,371733289 | 0,02988 | 1,400556321 | 0,00004 | SIGLEC1   | sialic acid binding Ig-like lectin 1, sialoadhesin                                      |
| 1,285206337 | 0,04096 | 1,178539408 | 0,00789 | SIGLEC10  | sialic acid binding Ig-like lectin 10                                                   |
| 0,541862983 | 0,00883 | 0,645281245 | 0,00001 | SIPA1L2   | signal-induced proliferation-associated 1 like 2                                        |
| 0,464580337 | 0,00242 | 0,615145672 | 0       | SIPA1L2   | signal-induced proliferation-associated 1 like 2                                        |
| 1,443929196 | 0,01069 | 1,22010051  | 0,02372 | SIRPG     | signal-regulatory protein gamma                                                         |
| 1,547564994 | 0,00305 | 1,473247686 | 0,00034 | SIT1      | signaling threshold regulating transmembrane adaptor 1                                  |
| 1,725482689 | 0,02443 | 1,243149669 | 0,0416  | SIX1      | SIX homeobox 1                                                                          |
| 1,295940965 | 0,03617 | 1,385109468 | 0,00232 | SIX5      | SIX homeobox 5                                                                          |
| 1,444930398 | 0,00316 | 1,317679952 | 0,00161 | SKAP1     | src kinase associated phosphoprotein 1                                                  |
| 1,802500925 | 0,03019 | 1,374588696 | 0,00857 | SKAP2     | src kinase associated phosphoprotein 2                                                  |
| 1,204137381 | 0,03676 | 1,197478705 | 0,01214 | SKAP2     | src kinase associated phosphoprotein 2                                                  |
| 0,648419777 | 0,00798 | 0,736113431 | 0,00108 | SKIV2L2   | superkiller viralicidal activity 2-like 2 (S. cerevisiae)                               |
| 0,681129017 | 0,0165  | 0,69640574  | 0,00001 | SKIV2L2   | superkiller viralicidal activity 2-like 2 (S. cerevisiae)                               |
| 0,743291492 | 0,02524 | 0,811689581 | 0,001   | SKP1      | S-phase kinase-associated protein 1                                                     |
| 0,620283649 | 0,00212 | 0,794985251 | 0,00748 | SKP1      | S-phase kinase-associated protein 1                                                     |
| 1,975201723 | 0,00122 | 1,745935182 | 0,00001 | SLA       | Src-like-adaptor                                                                        |
| 1,413233644 | 0,04521 | 1,129747215 | 0,04412 | SLAIN1    | SLAIN motif family, member 1                                                            |
| 0,643048742 | 0,04015 | 0,774855931 | 0,03557 | SLAIN2    | SLAIN motif family, member 2                                                            |
| 1,375541818 | 0,00773 | 1,185092771 | 0,00089 | SLAMF1    | signaling lymphocytic activation molecule family member 1                               |
| 1,669018562 | 0,0006  | 1,578987773 | 0,00006 | SLAMF1    | signaling lymphocytic activation molecule family member 1                               |
| 1,332374825 | 0,01703 | 1,408344227 | 0       | SLAMF1    | signaling lymphocytic activation molecule family member 1                               |
| 1,646040691 | 0,00033 | 1,443929196 | 0,00001 | SLAMF6    | SLAM family member 6                                                                    |
| 2,749177391 | 0,01232 | 2,579336501 | 0,0001  | SLAMF7    | SLAM family member 7                                                                    |
| 3,088700532 | 0,00003 | 3,269341314 | 0,00001 | SLAMF7    | SLAM family member 7                                                                    |
| 2,267338826 | 0,00175 | 2,139094176 | 0,00008 | SLAMF7    | SLAM family member 7                                                                    |
| 1,401527449 | 0,01119 | 1,141554707 | 0,02411 | SLAMF8    | SLAM family member 8                                                                    |
| 1,903955817 | 0,00236 | 1,372684431 | 0,00473 | SLAMF8    | SLAM family member 8                                                                    |
| 0,750019495 | 0,01452 | 0,718968266 | 0,00065 | SLBP      | stem-loop binding protein                                                               |
| 0,712518807 | 0,01228 | 0,813379198 | 0,00428 | SLC10A3   | solute carrier family 10 (sodium/bile acid cotransporter family), member 3              |
| 1,315854525 | 0,0371  | 1,295940965 | 0,0003  | SLC11A1   | solute carrier family 11 (proton-coupled divalent metal ion transporters), member 1     |
| 1,254402205 | 0,03294 | 1,20163605  | 0,00726 | SLC11A1   | solute carrier family 11 (proton-coupled divalent metal ion transporters), member 1     |
| 1,284315809 | 0,03433 | 1,25092908  | 0,00338 | SLC12A7   | solute carrier family 12 (potassium/chloride transporters), member 7                    |
| 2,470837274 | 0,01465 | 2,071965527 | 0,00031 | SLC12A8   | solute carrier family 12 (potassium/chloride transporters), member 8                    |
| 0,557096825 | 0,00332 | 0,744838732 | 0,00353 | SLC15A1   | solute carrier family 15 (oligopeptide transporter), member 1                           |
| 2,653690281 | 0,00014 | 1,767855062 | 0,00051 | SLC15A2   | solute carrier family 15 (H+/peptide transporter), member 2                             |
| 1,307671349 | 0,01447 | 1,167158102 | 0,04983 | SLC15A2   | solute carrier family 15 (H+/peptide transporter), member 2                             |
| 2,381713699 | 0,00135 | 1,31494276  | 0,0355  | SLC15A2   | solute carrier family 15 (H+/peptide transporter), member 2                             |
| 1,584469622 | 0,00912 | 1,437936533 | 0,00013 | SLC16A3   | solute carrier family 16, member 3 (monocarboxylic acid transporter 4)                  |
| 2,588291309 | 0,00166 | 1,803750757 | 0,00008 | SLC16A3   | solute carrier family 16, member 3 (monocarboxylic acid transporter 4)                  |
| 1,446934886 | 0,00097 | 1,267512522 | 0,00085 | SLC16A3   | solute carrier family 16, member 3 (monocarboxylic acid transporter 4)                  |
| 1,705269784 | 0,0161  | 1,20664392  | 0,01254 | SLC16A4   | solute carrier family 16, member 4 (monocarboxylic acid transporter 5)                  |
| 0,698339266 | 0,00095 | 0,798298386 | 0,00841 | SLC16A5   | solute carrier family 16, member 5 (monocarboxylic acid transporter 6)                  |
| 0,599569957 | 0,02746 | 0,52850902  | 0,00002 | SLC16A6   | solute carrier family 16, member 6 (monocarboxylic acid transporter 7)                  |
| 0,559030925 | 0,04022 | 0,552482242 | 0,00002 | SLC16A6   | solute carrier family 16, member 6 (monocarboxylic acid transporter 7)                  |
| 0,396392068 | 0,00081 | 0,44319085  | 0       | SLC16A9   | solute carrier family 16, member 9 (monocarboxylic acid transporter 9)                  |
| 1,285206337 | 0,01052 | 1,199971382 | 0,00406 | SLC17A7   | solute carrier family 17 (sodium-dependent inorganic phosphate cotransporter), member 7 |
| 1,476314406 | 0,00254 | 1,190031696 | 0,01077 | SLC17A7   | solute carrier family 17 (sodium-dependent inorganic phosphate cotransporter), member 7 |
| 1,444930398 | 0,02828 | 1,697015803 | 0,00002 | SLC17A9   | solute carrier family 17, member 9                                                      |
| 1,396678532 | 0,01353 | 1,442928687 | 0,00362 | SLC17A9   | solute carrier family 17, member 9                                                      |
| 1,301341855 | 0,03569 | 1,354724977 | 0,00355 | SLC17A9   | solute carrier family 17, member 9                                                      |
| 0,450625231 | 0,01692 | 0,442270218 | 0       | SLC19A2   | solute carrier family 19 (thiamine transporter), member 2                               |
| 1,356604327 | 0,0213  | 1,305859787 | 0,01982 | SLC1A4    | solute carrier family 1 (glutamate/neutral amino acid transporter), member 4            |
| 0,539240216 | 0,00504 | 0,689202576 | 0       | SLC22A23  | solute carrier family 22, member 23                                                     |
| 1,232852325 | 0,01188 | 1,163120042 | 0,02206 | SLC25A18  | solute carrier family 25 (mitochondrial carrier), member 18                             |
| 1,220946513 | 0,02515 | 1,16634937  | 0,0104  | SLC25A19  | solute carrier family 25 (mitochondrial thiamine pyrophosphate carrier), member 19      |
| 1,282536603 | 0,02037 | 1,391846392 | 0,00006 | SLC25A20  | solute carrier family 25 (carnitine/acylcarnitine translocase), member 20               |
| 1,246601194 | 0,03831 | 1,136816973 | 0,01938 | SLC25A24  | solute carrier family 25 (mitochondrial carrier; phosphate carrier), member 24          |
| 1,347233577 | 0,0067  | 1,372684431 | 0,00001 | SLC25A35  | solute carrier family 25, member 35                                                     |
| 1,176906737 | 0,04332 | 1,138394029 | 0,02186 | SLC25A35  | solute carrier family 25, member 35                                                     |

|              |         |             |         |          |                                                                                                                 |
|--------------|---------|-------------|---------|----------|-----------------------------------------------------------------------------------------------------------------|
| 1,383190629  | 0,00743 | 1,165541198 | 0,02188 | SLC25A38 | solute carrier family 25, member 38                                                                             |
| 0,575544746  | 0,02414 | 0,552482242 | 0,00031 | SLC25A43 | solute carrier family 25, member 43                                                                             |
| 1,488645255  | 0,00776 | 1,53581027  | 0,00018 | SLC25A45 | solute carrier family 25, member 45                                                                             |
| 0,633317127  | 0,03849 | 0,827596816 | 0,01293 | SLC25A5  | solute carrier family 25 (mitochondrial carrier; adenine nucleotide translocator), member 5                     |
| 0,461691155  | 0,00021 | 0,42720487  | 0,00007 | SLC27A6  | solute carrier family 27 (fatty acid transporter), member 6                                                     |
| 1,907919101  | 0,00879 | 1,495885758 | 0,00294 | SLC2A10  | solute carrier family 2 (facilitated glucose transporter), member 10                                            |
| 1,362258035  | 0,00903 | 1,266634254 | 0,00164 | SLC2A11  | solute carrier family 2 (facilitated glucose transporter), member 11                                            |
| 0,824162085  | 0,0195  | 0,745355193 | 0,00055 | SLC2A13  | solute carrier family 2 (facilitated glucose transporter), member 13                                            |
| 1,76418273   | 0,00028 | 1,555092072 | 0,00078 | SLC2A3   | solute carrier family 2 (facilitated glucose transporter), member 3                                             |
| 1,426025717  | 0,01246 | 1,365093718 | 0,02593 | SLC2A3   | solute carrier family 2 (facilitated glucose transporter), member 3                                             |
| 2,606294299  | 0,0031  | 1,943961976 | 0,00016 | SLC2A3   | solute carrier family 2 (facilitated glucose transporter), member 3                                             |
| 0,717474767  | 0,04992 | 0,744838732 | 0,00001 | SLC30A9  | solute carrier family 30 (zinc transporter), member 9                                                           |
| 0,732550437  | 0,0254  | 0,828170661 | 0,02194 | SLC31A1  | solute carrier family 31 (copper transporters), member 1                                                        |
| 0,720964436  | 0,00415 | 0,815072332 | 0,04419 | SLC31A2  | solute carrier family 31 (copper transporters), member 2                                                        |
| 1,277213759  | 0,0254  | 1,252664439 | 0,00008 | SLC35B2  | solute carrier family 35, member B2                                                                             |
| 1,268391399  | 0,0428  | 1,105730653 | 0,03173 | SLC35D2  | solute carrier family 35, member D2                                                                             |
| 0,697371833  | 0,00845 | 0,814507563 | 0,00244 | SLC35F2  | solute carrier family 35, member F2                                                                             |
| 0,636397468  | 0,04494 | 0,652025368 | 0,00041 | SLC35F5  | solute carrier family 35, member F5                                                                             |
| 0,791137301  | 0,00531 | 0,813379198 | 0,0239  | SLC37A2  | solute carrier family 37 (glycerol-3-phosphate transporter), member 2                                           |
| 1,466116757  | 0,00209 | 1,262252032 | 0,00323 | SLC38A10 | solute carrier family 38, member 10                                                                             |
| 1,475291457  | 0,04758 | 1,227735684 | 0,01307 | SLC38A6  | solute carrier family 38, member 6                                                                              |
| 1,568080908  | 0,00157 | 1,356604327 | 0,00113 | SLC39A14 | solute carrier family 39 (zinc transporter), member 14                                                          |
| 0,50278029   | 0,00008 | 0,791685866 | 0,0422  | SLC39A2  | solute carrier family 39 (zinc transporter), member 2                                                           |
| 0,542238704  | 0,01294 | 0,739693755 | 0,00004 | SLC39A6  | solute carrier family 39 (zinc transporter), member 6                                                           |
| 0,457866843  | 0,03503 | 0,654289036 | 0,00604 | SLC39A6  | solute carrier family 39 (zinc transporter), member 6                                                           |
| 2,602683711  | 0,00001 | 1,680627504 | 0,00035 | SLC39A8  | solute carrier family 39 (zinc transporter), member 8                                                           |
| 2,025109615  | 0,00072 | 1,423063461 | 0,03121 | SLC39A8  | solute carrier family 39 (zinc transporter), member 8                                                           |
| 1,264879542  | 0,02391 | 1,180174343 | 0,03134 | SLC39A9  | solute carrier family 39 (zinc transporter), member 9                                                           |
| 1,782620992  | 0,00312 | 1,56265576  | 0,00015 | SLC40A1  | solute carrier family 40 (iron-regulated transporter), member 1                                                 |
| 1,640345822  | 0,00059 | 1,508380077 | 0,00209 | SLC41A2  | solute carrier family 41, member 2                                                                              |
| 1,554014538  | 0,00021 | 1,298638603 | 0,00064 | SLC41A2  | solute carrier family 41, member 2                                                                              |
| 1,275444392  | 0,02791 | 1,224336392 | 0,00288 | SLC43A1  | solute carrier family 43, member 1                                                                              |
| 0,691595315  | 0,02718 | 0,824162085 | 0,00488 | SLC44A1  | solute carrier family 44, member 1                                                                              |
| 0,692554734  | 0,04757 | 0,87175824  | 0,03606 | SLC44A2  | solute carrier family 44, member 2                                                                              |
| 0,604577838  | 0,00322 | 0,76684133  | 0,00454 | SLC44A5  | solute carrier family 44, member 5                                                                              |
| 1,377450046  | 0,00157 | 1,169587664 | 0,03691 | SLC45A3  | solute carrier family 45, member 3                                                                              |
| 1,617762697  | 0,00506 | 1,298638603 | 0,00047 | SLC45A4  | solute carrier family 45, member 4                                                                              |
| 1,198309021  | 0,04718 | 1,174461971 | 0,02596 | SLC46A1  | solute carrier family 46 (folate transporter), member 1                                                         |
| 0,683493726  | 0,0479  | 0,759962428 | 0,00043 | SLC4A11  | solute carrier family 4, sodium borate transporter, member 11                                                   |
| 1,427014506  | 0,03965 | 1,306765254 | 0,03586 | SLC5A1   | solute carrier family 5 (sodium/glucose cotransporter), member 1                                                |
| 0,775930854  | 0,03653 | 0,845572287 | 0,03411 | SLC5A10  | solute carrier family 5 (sodium/glucose cotransporter), member 10                                               |
| 1,295940965  | 0,01918 | 1,184271612 | 0,00049 | SLC5A2   | solute carrier family 5 (sodium/glucose cotransporter), member 2                                                |
| 1,249196126  | 0,03628 | 1,132098902 | 0,01542 | SLC6A12  | solute carrier family 6 (neurotransmitter transporter, betaine/GABA), member 12                                 |
| 1,547564994  | 0,00636 | 1,408344227 | 0,00019 | SLC6A13  | solute carrier family 6 (neurotransmitter transporter, GABA), member 13                                         |
| 0,486327474  | 0,02441 | 0,608361179 | 0,01611 | SLC6A14  | solute carrier family 6 (amino acid transporter), member 14                                                     |
| 1,669018562  | 0,03979 | 1,337927555 | 0,00113 | SLC6A16  | solute carrier family 6, member 16                                                                              |
| 0,801625329  | 0,04689 | 0,780786493 | 0,00079 | SLC6A4   | solute carrier family 6 (neurotransmitter transporter, serotonin), member 4                                     |
| 1,242288282  | 0,04747 | 1,231998073 | 0,02154 | SLC6A6   | solute carrier family 6 (neurotransmitter transporter, taurine), member 6                                       |
| 0,669427628  | 0,03635 | 0,745355193 | 0,00019 | SLC7A1   | solute carrier family 7 (cationic amino acid transporter, y+ system), member 1                                  |
| 0,677362489  | 0,00522 | 0,770037174 | 0,00019 | SLC7A1   | solute carrier family 7 (cationic amino acid transporter, y+ system), member 1                                  |
| 2,032140286  | 0,00001 | 1,583371732 | 0,00005 | SLC7A7   | solute carrier family 7 (amino acid transporter light chain, y+L system), member 7                              |
| 0,649769531  | 0,02138 | 0,807760778 | 0,01826 | SLC7A8   | solute carrier family 7 (amino acid transporter light chain, L system), member 8                                |
| 1,240567298  | 0,01373 | 1,181811547 | 0,00148 | SLC8A1   | solute carrier family 8 (sodium/calcium exchanger), member 1                                                    |
| 1,1711010181 | 0,04181 | 1,121943481 | 0,02927 | SLC8A3   | solute carrier family 8 (sodium/calcium exchanger), member 3                                                    |
| 1,257884972  | 0,04483 | 1,234562607 | 0,00286 | SLC8A3   | solute carrier family 8 (sodium/calcium exchanger), member 3                                                    |
| 1,585568273  | 0,00142 | 1,305859787 | 0,00067 | SLCO2A1  | solute carrier organic anion transporter family, member 2A1                                                     |
| 1,312211255  | 0,04897 | 1,307671349 | 0,01743 | SLCO2B1  | solute carrier organic anion transporter family, member 2B1                                                     |
| 1,710004356  | 0,00133 | 1,583371732 | 0,00052 | SLFN11   | schlafen family member 11                                                                                       |
| 0,654289036  | 0,00719 | 0,819604608 | 0,00743 | SLIRP    | SRA stem-loop interacting RNA binding protein                                                                   |
| 0,755759964  | 0,01488 | 0,659296807 | 0,00005 | SLIT2    | slit homolog 2 (Drosophila)                                                                                     |
| 0,717474767  | 0,01859 | 0,555554364 | 0,00014 | SLIT2    | slit homolog 2 (Drosophila)                                                                                     |
| 0,651122095  | 0,02001 | 0,681129017 | 0,00037 | SLITRK6  | SLIT and NTRK-like family, member 6                                                                             |
| 0,552099424  | 0,02074 | 0,720464874 | 0,00023 | SLK      | STE20-like kinase                                                                                               |
| 0,538866573  | 0,02388 | 0,599895691 | 0,00005 | SLK      | STE20-like kinase                                                                                               |
| 0,640823962  | 0,04734 | 0,724471077 | 0,00049 | SLMAP    | sarcolemma associated protein                                                                                   |
| 0,704172113  | 0,03966 | 0,718470088 | 0,00658 | SLMO2    | slowmo homolog 2 (Drosophila)                                                                                   |
| 0,654742712  | 0,02894 | 0,62981499  | 0,0035  | SLMO2    | slowmo homolog 2 (Drosophila)                                                                                   |
| 0,407818747  | 0,00235 | 0,622437118 | 0,01334 | SLURP1   | secreted LY6/PLAUR domain containing 1                                                                          |
| 0,639049682  | 0,01527 | 0,790041312 | 0,00129 | SMAD2    | SMAD family member 2                                                                                            |
| 0,703684188  | 0,02024 | 0,820172911 | 0,02574 | SMAGP    | small cell adhesion glycoprotein                                                                                |
| 1,510752637  | 0,00407 | 1,599920257 | 0,0001  | SMAP2    | small ArfGAP2                                                                                                   |
| 0,54770042   | 0,00608 | 0,749499801 | 0,01358 | SMARCA1  | SWI/SNF related, matrix associated, actin dependent regulator of chromatin, subfamily a, member 1               |
| 0,599569957  | 0,00157 | 0,741233505 | 0,00029 | SMARCA4  | SWI/SNF related, matrix associated, actin dependent regulator of chromatin, subfamily a, member 4               |
| 0,637722196  | 0,02617 | 0,829894586 | 0,04008 | SMARCA4  | SWI/SNF-related, matrix-associated actin-dependent regulator of chromatin, subfamily a, containing DEAD/H box 1 |
| 0,651573575  | 0,03987 | 0,801625329 | 0,00556 | SMARCC1  | SWI/SNF related, matrix associated, actin dependent regulator of chromatin, subfamily c, member 1               |
| 0,655651007  | 0,00015 | 0,755236293 | 0,00004 | SMARCE1  | SWI/SNF related, matrix associated, actin dependent regulator of chromatin, subfamily e, member 1               |
| 0,42513708   | 0,00733 | 0,480630464 | 0,00001 | SMC3     | structural maintenance of chromosomes 3                                                                         |
| 0,470413054  | 0,0241  | 0,531079593 | 0,00005 | SMG1     | smg-1 homolog, phosphatidylinositol 3-kinase-related kinase (C. elegans)                                        |
| 1,520978753  | 0,03684 | 1,441928871 | 0,00437 | SMOC2    | SPARC related modular calcium binding 2                                                                         |
| 0,713012859  | 0,01722 | 0,777007269 | 0,00349 | SMPD2    | sphingomyelin phosphodiesterase 2, neutral membrane (neutral sphingomyelinase)                                  |
| 0,558256481  | 0,01401 | 0,666649339 | 0,00562 | SMPDL3A  | sphingomyelin phosphodiesterase, acid-like 3A                                                                   |
| 1,639209215  | 0,00089 | 1,592176198 | 0,00009 | SMPDL3B  | sphingomyelin phosphodiesterase, acid-like 3B                                                                   |
| 1,873842894  | 0,00009 | 1,601029621 | 0,00012 | SMPDL3B  | sphingomyelin phosphodiesterase, acid-like 3B                                                                   |
| 0,740206649  | 0,0202  | 0,79940583  | 0,03103 | SMU1     | smu-1 suppressor of mec-8 and unc-52 homolog (C. elegans)                                                       |
| 0,624165274  | 0,00584 | 0,798851916 | 0,01945 | SMURF1   | SMAD specific E3 ubiquitin protein ligase 1                                                                     |
| 1,207480591  | 0,04005 | 1,209994089 | 0,0012  | SNAI3    | snail homolog 3 (Drosophila)                                                                                    |
| 1,654046737  | 0,0009  | 1,325007017 | 0,00073 | SNAP25   | synaptosomal-associated protein, 25kDa                                                                          |
| 1,43296165   | 0,009   | 1,248330549 | 0,00061 | SNAP25   | synaptosomal-associated protein, 25kDa                                                                          |
| 1,534746096  | 0,00476 | 1,269270886 | 0,00081 | SNAP25   | synaptosomal-associated protein, 25kDa                                                                          |
| 0,651573575  | 0,04651 | 0,787307977 | 0,00919 | SNAP29   | synaptosomal-associated protein, 29kDa                                                                          |
| 0,727994774  | 0,02782 | 0,831045862 | 0,03586 | SNHG12   | small nucleolar RNA host gene 12 (non-protein coding)                                                           |
| 0,731028724  | 0,02121 | 0,735603373 | 0,00281 | SNHG3    | small nucleolar RNA host gene 3 (non-protein coding)                                                            |
| 0,774855931  | 0,00651 | 0,825877665 | 0,00142 | SNHG5    | small nucleolar RNA host gene 5 (non-protein coding)                                                            |
| 0,646624466  | 0,00404 | 0,820741609 | 0,00209 | SNRP21   | small nuclear ribonucleoprotein polypeptide A'                                                                  |
| 0,590496331  | 0,0384  | 0,775393206 | 0,00001 | SNRPD1   | small nuclear ribonucleoprotein D1 polypeptide 16kDa                                                            |
| 0,519789718  | 0,00048 | 0,720964436 | 0,00004 | SNRPD3   | small nuclear ribonucleoprotein D3 polypeptide 18kDa                                                            |
| 0,69399636   | 0,00359 | 0,834509281 | 0,00029 | SNRPE    | small nuclear ribonucleoprotein polypeptide E                                                                   |
| 0,601234624  | 0,00103 | 0,739181216 | 0,00085 | SNRPF    | small nuclear ribonucleoprotein polypeptide F                                                                   |



|             |         |             |         |          |                                                                                   |
|-------------|---------|-------------|---------|----------|-----------------------------------------------------------------------------------|
| 0,654289036 | 0,03748 | 0,790041312 | 0,03674 | SNTB2    | syntrophin, beta 2 (dystrophin-associated protein A1, 59kDa, basic component 2)   |
| 0,669427628 | 0,01785 | 0,815637493 | 0,01676 | SNX1     | sorting nexin 1                                                                   |
| 0,650670928 | 0,00159 | 0,821880187 | 0,00754 | SNX12    | sorting nexin 12                                                                  |
| 1,265756594 | 0,02533 | 1,155085785 | 0,01716 | SNX20    | sorting nexin 20                                                                  |
| 1,462057448 | 0,02251 | 1,500038989 | 0,00345 | SNX20    | sorting nexin 20                                                                  |
| 0,524494664 | 0,02882 | 0,641712949 | 0,00074 | SNX21    | sorting nexin family member 21                                                    |
| 0,762600827 | 0,01988 | 0,85797053  | 0,01696 | SNX21    | sorting nexin family member 21                                                    |
| 0,71449707  | 0,00344 | 0,823591017 | 0,02596 | SNX21    | sorting nexin family member 21                                                    |
| 0,642603169 | 0,0419  | 0,665725807 | 0,00002 | SNX24    | sorting nexin 24                                                                  |
| 1,301341855 | 0,03113 | 1,183451022 | 0,00944 | SNX32    | sorting nexin 32                                                                  |
| 1,632406092 | 0,01373 | 1,195819797 | 0,03762 | SOAT1    | sterol O-acyltransferase 1                                                        |
| 1,546492675 | 0,01844 | 1,204972315 | 0,01826 | SOC51    | suppressor of cytokine signaling 1                                                |
| 1,280759861 | 0,00625 | 1,119612889 | 0,04101 | SOC51    | suppressor of cytokine signaling 1                                                |
| 2,67585511  | 0,00005 | 1,611048582 | 0,02264 | SOC53    | suppressor of cytokine signaling 3                                                |
| 0,587638164 | 0,024   | 0,546767729 | 0,00017 | SOC56    | suppressor of cytokine signaling 6                                                |
| 0,641712949 | 0,03927 | 0,686818117 | 0,02352 | SOC56    | suppressor of cytokine signaling 6                                                |
| 0,569986636 | 0,0427  | 0,564873607 | 0,00008 | SOC56    | suppressor of cytokine signaling 6                                                |
| 0,577943353 | 0,00236 | 0,813943185 | 0,00123 | SOD1     | superoxide dismutase 1, soluble                                                   |
| 1,424050196 | 0,01868 | 1,403471726 | 0,01391 | SOD2     | superoxide dismutase 2, mitochondrial                                             |
| 1,818816504 | 0,00182 | 1,42899414  | 0,00119 | SOD2     | superoxide dismutase 2, mitochondrial                                             |
| 0,666649339 | 0,00424 | 0,735093668 | 0,01087 | SORD     | sorbitol dehydrogenase                                                            |
| 0,611744021 | 0,00422 | 0,719965659 | 0,00167 | SORD     | sorbitol dehydrogenase                                                            |
| 0,627635996 | 0,01042 | 0,787853886 | 0,00559 | SORT1    | sortilin 1                                                                        |
| 1,336074078 | 0,03577 | 1,349102534 | 0,00199 | SOX13    | SRY (sex determining region Y)-box 13                                             |
| 1,601029621 | 0,00139 | 1,351910833 | 0,00063 | SOX17    | SRY (sex determining region Y)-box 17                                             |
| 1,572434584 | 0,03734 | 1,427014506 | 0,00084 | SOX18    | SRY (sex determining region Y)-box 18                                             |
| 0,497579861 | 0,03268 | 0,511214265 | 0,00007 | SOX6     | SRY (sex determining region Y)-box 6                                              |
| 0,462973011 | 0,00011 | 0,639049682 | 0,00028 | SOX6     | SRY (sex determining region Y)-box 6                                              |
| 1,38991822  | 0,01785 | 1,141554707 | 0,03457 | SP110    | SP110 nuclear body protein                                                        |
| 1,980685744 | 0,00109 | 1,813780658 | 0,00004 | SP140    | SP140 nuclear body protein                                                        |
| 0,632439771 | 0,00539 | 0,650670928 | 0,00012 | SPAG16   | sperm associated antigen 16                                                       |
| 0,346277367 | 0,00015 | 0,415522931 | 0       | SPAG17   | sperm associated antigen 17                                                       |
| 4,047412804 | 0,00001 | 3,986161051 | 0       | SPAG4    | sperm associated antigen 4                                                        |
| 0,620713746 | 0,00246 | 0,671286251 | 0,00042 | SPAG9    | sperm associated antigen 9                                                        |
| 1,714752073 | 0,04759 | 1,423063461 | 0,0006  | SPATS2   | spermatogenesis associated, serine-rich 2                                         |
| 1,333298677 | 0,03688 | 1,337000495 | 0,00168 | SPATS2   | spermatogenesis associated, serine-rich 2                                         |
| 1,501079098 | 0,00018 | 1,215879283 | 0,01082 | SPCS1    | signal peptidase complex subunit 1 homolog (S. cerevisiae)                        |
| 1,859609885 | 0,00339 | 1,422077411 | 0,00413 | SPCS3    | signal peptidase complex subunit 3 homolog (S. cerevisiae)                        |
| 1,472226862 | 0,00093 | 1,373636233 | 0,00066 | SPCS3    | signal peptidase complex subunit 3 homolog (S. cerevisiae)                        |
| 1,915870436 | 0,00084 | 1,558329159 | 0,00008 | SPCS3    | signal peptidase complex subunit 3 homolog (S. cerevisiae)                        |
| 1,625631204 | 0,00094 | 1,180992661 | 0,04105 | SPIB     | Spi-B transcription factor (Spi-1/PU.1 related)                                   |
| 1,295042999 | 0,01609 | 1,147107024 | 0,00388 | SPIN3    | spindlin family, member 3                                                         |
| 0,559030925 | 0,01528 | 0,793333843 | 0,00363 | SPINK5   | serine peptidase inhibitor, Kazal type 5                                          |
| 1,366040257 | 0,02284 | 1,258757174 | 0,00551 | SPN      | sialophorin                                                                       |
| 0,798851916 | 0,04784 | 0,739181216 | 0,00499 | SPOPL    | speckle-type POZ protein-like                                                     |
| 0,703684188 | 0,00013 | 0,751580739 | 0,00128 | SPPL3    | signal peptide peptidase-like 3                                                   |
| 0,703684188 | 0,00288 | 0,763129604 | 0,00168 | SPPL3    | signal peptide peptidase-like 3                                                   |
| 0,674083866 | 0,00318 | 0,71946679  | 0,00006 | SPPL3    | signal peptide peptidase-like 3                                                   |
| 0,771640088 | 0,01424 | 0,863938187 | 0,00783 | SPPL3    | signal peptide peptidase-like 3                                                   |
| 0,797192477 | 0,01187 | 0,918276162 | 0,04093 | SPRR1B   | small proline-rich protein 1B                                                     |
| 1,572434584 | 0,00997 | 1,286989247 | 0,00426 | SPRY1    | sprouty homolog 1, antagonist of FGF signaling (Drosophila)                       |
| 1,297738767 | 0,02941 | 1,423063461 | 0,00008 | SPRY1    | sprouty homolog 1, antagonist of FGF signaling (Drosophila)                       |
| 0,644387315 | 0,0122  | 0,748461493 | 0,00052 | SPRYD7   | SPRY domain containing 7                                                          |
| 0,610473256 | 0,00086 | 0,81735328  | 0,04301 | SPTLC2   | serine palmitoyltransferase, long chain base subunit 2                            |
| 0,421031477 | 0,00002 | 0,633317127 | 0,00048 | SPTLC3   | serine palmitoyltransferase, long chain base subunit 3                            |
| 0,602068691 | 0,02261 | 0,677832163 | 0,00223 | SQLE     | squalene epoxidase                                                                |
| 0,472701058 | 0,01237 | 0,628071191 | 0,01679 | SQLE     | squalene epoxidase                                                                |
| 0,598739352 | 0,01639 | 0,712025098 | 0,00092 | SQLE     | squalene epoxidase                                                                |
| 1,224336392 | 0,02738 | 1,196648963 | 0,02272 | SQSTM1   | sequestosome 1                                                                    |
| 0,682073917 | 0,02229 | 0,69399636  | 0,00003 | SREK1IP1 | SREK1-interacting protein 1                                                       |
| 0,476318999 | 0,01974 | 0,539240216 | 0       | SREK1IP1 | SREK1-interacting protein 1                                                       |
| 0,593779833 | 0,0395  | 0,616426163 | 0,00019 | SREK1IP1 | SREK1-interacting protein 1                                                       |
| 0,552099424 | 0,00421 | 0,627635996 | 0,00149 | SREK1IP1 | SREK1-interacting protein 1                                                       |
| 1,346300069 | 0,02994 | 1,238848698 | 0,00182 | SRF      | serum response factor (c-fos serum response element-binding transcription factor) |
| 1,798756624 | 0,01618 | 1,505246747 | 0,00756 | SRGN     | serglycin                                                                         |
| 2,398279828 | 0,00011 | 1,973833092 | 0,00002 | SRGN     | serglycin                                                                         |
| 0,780786493 | 0,00733 | 0,814507563 | 0,00151 | SRI      | sorcin                                                                            |
| 0,746906729 | 0,0276  | 0,807201075 | 0,00401 | SRR      | serine racemase                                                                   |
| 0,690637224 | 0,01657 | 0,779704843 | 0,00026 | SRSF1    | serine/arginine-rich splicing factor 1                                            |
| 0,71548826  | 0,04135 | 0,849096246 | 0,03008 | SRSF2    | serine/arginine-rich splicing factor 2                                            |
| 0,711038705 | 0,03484 | 0,765778999 | 0,00449 | SRSF2    | serine/arginine-rich splicing factor 2                                            |
| 0,809442217 | 0,04224 | 0,868140228 | 0,00392 | SRSF3    | serine/arginine-rich splicing factor 3                                            |
| 0,737645729 | 0,04273 | 0,779704843 | 0,04051 | SRSF3    | serine/arginine-rich splicing factor 3                                            |
| 0,734075318 | 0,02501 | 0,884540435 | 0,04604 | SRSF5    | serine/arginine-rich splicing factor 5                                            |
| 0,698339266 | 0,02228 | 0,827596816 | 0,00188 | SRSF7    | serine/arginine-rich splicing factor 7                                            |
| 0,78132788  | 0,00985 | 0,848507902 | 0,04831 | SRSF8    | serine/arginine-rich splicing factor 8                                            |
| 0,815072332 | 0,01113 | 0,859756486 | 0,00934 | SRSF8    | serine/arginine-rich splicing factor 8                                            |
| 0,61985385  | 0,00088 | 0,778624691 | 0,00004 | SRSF8    | serine/arginine-rich splicing factor 8                                            |
| 0,647521499 | 0,00445 | 0,744322628 | 0,02245 | SS18     | synovial sarcoma translocation, chromosome 18                                     |
| 0,574349177 | 0,02949 | 0,72597914  | 0,00001 | SSB      | Sjogren syndrome antigen B (autoantigen La)                                       |
| 0,595841287 | 0,01745 | 0,740206649 | 0,00037 | SSBP1    | single-stranded DNA binding protein 1                                             |
| 0,69640574  | 0,02837 | 0,712025098 | 0,00185 | SSBP2    | single-stranded DNA binding protein 2                                             |
| 0,656560563 | 0,01501 | 0,743806881 | 0,01541 | SSBP2    | single-stranded DNA binding protein 2                                             |
| 1,770307529 | 0,00065 | 1,423063461 | 0,04199 | SSR3     | signal sequence receptor, gamma (translocon-associated protein gamma)             |
| 1,517819253 | 0,00983 | 1,515716567 | 0,00001 | SSR3     | signal sequence receptor, gamma (translocon-associated protein gamma)             |
| 0,594603558 | 0,02057 | 0,787853886 | 0,00038 | SSU72    | SSU72 RNA polymerase II CTD phosphatase homolog (S. cerevisiae)                   |
| 0,685391402 | 0,00467 | 0,78024548  | 0,01086 | SSX2IP   | synovial sarcoma, X breakpoint 2 interacting protein                              |
| 0,52595089  | 0,00005 | 0,66342257  | 0,00013 | SSX2IP   | synovial sarcoma, X breakpoint 2 interacting protein                              |
| 0,594603558 | 0,03099 | 0,622437118 | 0,00005 | SSX2IP   | synovial sarcoma, X breakpoint 2 interacting protein                              |
| 0,700763725 | 0,01841 | 0,680657058 | 0,00015 | SSX2IP   | synovial sarcoma, X breakpoint 2 interacting protein                              |
| 1,635804117 | 0,03393 | 1,754427097 | 0,00002 | ST3GAL1  | ST3 beta-galactoside alpha-2,3-sialyltransferase 1                                |
| 1,440929749 | 0,02464 | 1,285206337 | 0,00134 | ST3GAL2  | ST3 beta-galactoside alpha-2,3-sialyltransferase 2                                |
| 1,279872414 | 0,04903 | 1,333298677 | 0,00142 | ST3GAL2  | ST3 beta-galactoside alpha-2,3-sialyltransferase 2                                |
| 1,179356592 | 0,04385 | 1,240567298 | 0,00023 | ST3GAL3  | ST3 beta-galactoside alpha-2,3-sialyltransferase 3                                |
| 1,344434994 | 0,02342 | 1,202469249 | 0,00134 | ST3GAL3  | ST3 beta-galactoside alpha-2,3-sialyltransferase 3                                |
| 1,491744027 | 0,0005  | 1,223488041 | 0,00741 | ST3GAL5  | ST3 beta-galactoside alpha-2,3-sialyltransferase 5                                |
| 2,997999204 | 0,00004 | 2,579336501 | 0,00003 | ST6GAL1  | ST6 beta-galactosamide alpha-2,6-sialyltransferase 1                              |
| 2,834314793 | 0,00259 | 2,240778428 | 0,00547 | ST6GAL1  | ST6 beta-galactosamide alpha-2,6-sialyltransferase 1                              |

|             |         |             |         |            |                                                                                                               |
|-------------|---------|-------------|---------|------------|---------------------------------------------------------------------------------------------------------------|
| 1,511519928 | 0,00994 | 1,140763716 | 0,03288 | ST6GALNAC3 | ST6 (alpha-N-acetyl-neuraminyl-2,3-beta-galactosyl-1,3)-N-acetylgalactosaminide alpha-2,6-sialyltransferase 3 |
| 0,574747424 | 0,00285 | 0,744322628 | 0,00108 | ST7L       | suppression of tumorigenicity 7 like                                                                          |
| 1,255271991 | 0,01448 | 1,122721422 | 0,03384 | ST8SIA3    | ST8 alpha-N-acetyl-neuraminide alpha-2,8-sialyltransferase 3                                                  |
| 1,492778383 | 0,0027  | 1,22858698  | 0,02079 | ST8SIA4    | ST8 alpha-N-acetyl-neuraminide alpha-2,8-sialyltransferase 4                                                  |
| 1,748357241 | 0,00037 | 1,376495602 | 0,00383 | ST8SIA4    | ST8 alpha-N-acetyl-neuraminide alpha-2,8-sialyltransferase 4                                                  |
| 2,329467173 | 0,00034 | 1,747145792 | 0,00109 | ST8SIA4    | ST8 alpha-N-acetyl-neuraminide alpha-2,8-sialyltransferase 4                                                  |
| 2,222217457 | 0,00005 | 1,568080908 | 0,00417 | ST8SIA4    | ST8 alpha-N-acetyl-neuraminide alpha-2,8-sialyltransferase 4                                                  |
| 1,461044379 | 0,04368 | 1,846764621 | 0       | STAB1      | stabilin 1                                                                                                    |
| 1,69466487  | 0,01381 | 1,845484985 | 0       | STAB1      | stabilin 1                                                                                                    |
| 1,421092043 | 0,01632 | 1,151089491 | 0,02748 | STAG1      | stromal antigen 1                                                                                             |
| 0,755236293 | 0,02558 | 0,81056512  | 0,0009  | STAMPB     | STAM binding protein                                                                                          |
| 1,673652485 | 0,00004 | 1,273677475 | 0,00088 | STAMBPL1   | STAM binding protein-like 1                                                                                   |
| 1,816296835 | 0,00001 | 1,362258035 | 0,0023  | STAP1      | signal transducing adaptor family member 1                                                                    |
| 3,157975547 | 0       | 1,798756624 | 0,00109 | STAP1      | signal transducing adaptor family member 1                                                                    |
| 0,551334582 | 0,00075 | 0,775393206 | 0,00256 | STAP2      | signal transducing adaptor family member 2                                                                    |
| 1,444930398 | 0,01259 | 1,209155676 | 0,00678 | STARD8     | StAR-related lipid transfer (START) domain containing 8                                                       |
| 1,303147149 | 0,03125 | 1,25962998  | 0,00146 | STAT2      | signal transducer and activator of transcription 2, 113kDa                                                    |
| 1,509425969 | 0,02199 | 1,379360922 | 0,00109 | STAT4      | signal transducer and activator of transcription 4                                                            |
| 1,4063932   | 0,00601 | 1,194991205 | 0,01671 | STAT5A     | signal transducer and activator of transcription 5A                                                           |
| 1,358486285 | 0,00555 | 1,227735684 | 0,00581 | STC2       | stanniocalcin 2                                                                                               |
| 1,356604327 | 0,00146 | 1,421092043 | 0,00008 | STK10      | serine/threonine kinase 10                                                                                    |
| 0,685391402 | 0,01863 | 0,770037174 | 0,00114 | STK11      | serine/threonine kinase 11                                                                                    |
| 2,139094176 | 0,00007 | 1,510472586 | 0,00463 | STK17B     | serine/threonine kinase 17b                                                                                   |
| 2,037782393 | 0,00011 | 1,542210825 | 0,00052 | STK17B     | serine/threonine kinase 17b                                                                                   |
| 1,702907415 | 0,00568 | 1,280759861 | 0,02004 | STK17B     | serine/threonine kinase 17b                                                                                   |
| 0,582770599 | 0,01025 | 0,877821798 | 0,01638 | STK38      | serine/threonine kinase 38                                                                                    |
| 0,491751037 | 0,00851 | 0,547146851 | 0       | STK39      | serine threonine kinase 39                                                                                    |
| 1,204972315 | 0,02828 | 1,286989247 | 0,00037 | STMN4      | stathmin-like 4                                                                                               |
| 1,504203751 | 0,00771 | 1,199971382 | 0,02473 | STOM       | stomatin                                                                                                      |
| 1,411275843 | 0,02192 | 1,257013375 | 0,00119 | STOM       | stomatin                                                                                                      |
| 1,467133344 | 0,00269 | 1,598811661 | 0,00002 | STRA6      | stimulated by retinoic acid gene 6 homolog (mouse)                                                            |
| 0,779704843 | 0,02251 | 0,816768891 | 0,00622 | STRAP      | serine/threonine kinase receptor associated protein                                                           |
| 0,604997045 | 0,02102 | 0,750539549 | 0,00399 | STRN       | striatin, calmodulin binding protein                                                                          |
| 1,269270886 | 0,02701 | 1,193335743 | 0,00702 | STS        | steroid sulfatase (microsomal), isozyme 5                                                                     |
| 0,724471077 | 0,04427 | 0,699792933 | 0,00137 | STX17      | syntaxin 17                                                                                                   |
| 0,605416542 | 0,00401 | 0,579949827 | 0,00002 | STX19      | syntaxin 19                                                                                                   |
| 1,32317144  | 0,01032 | 1,223488041 | 0,00338 | STX2       | syntaxin 2                                                                                                    |
| 0,655651007 | 0,00745 | 0,728499557 | 0,04065 | STX3       | syntaxin 3                                                                                                    |
| 0,610050255 | 0,0189  | 0,532185091 | 0,00016 | STXBP5     | syntaxin binding protein 5 (tomosyn)                                                                          |
| 0,676424116 | 0,03491 | 0,636397468 | 0,0056  | STYX       | serine/threonine/tyrosine interacting protein                                                                 |
| 0,596667872 | 0,04029 | 0,651122095 | 0,00161 | STYX       | serine/threonine/tyrosine interacting protein                                                                 |
| 0,69399636  | 0,01127 | 0,865136691 | 0,00979 | SUCLG1     | succinate-CoA ligase, alpha subunit                                                                           |
| 0,650220073 | 0,00566 | 0,757858283 | 0,00001 | SUGT1      | SGT1, suppressor of G2 allele of SKP1 ( <i>S. cerevisiae</i> )                                                |
| 0,646176415 | 0,00705 | 0,774855931 | 0,00003 | SUGT1      | SGT1, suppressor of G2 allele of SKP1 ( <i>S. cerevisiae</i> )                                                |
| 0,728499557 | 0,02923 | 0,854409741 | 0,00456 | SULF2      | sulfatase 2                                                                                                   |
| 1,294145654 | 0,0481  | 1,392811481 | 0,00243 | SULT1E1    | sulfotransferase family 1E, estrogen-preferring, member 1                                                     |
| 0,752623374 | 0,00905 | 0,847332435 | 0,00336 | SUMF1      | sulfatase modifying factor 1                                                                                  |
| 0,656560563 | 0,00501 | 0,808320869 | 0,038   | SUN1       | Sad1 and UNC84 domain containing 1                                                                            |
| 0,706127202 | 0,01357 | 0,767373048 | 0,00046 | SUN1       | Sad1 and UNC84 domain containing 1                                                                            |
| 1,540074348 | 0,0032  | 1,396678532 | 0,00007 | SUOX       | sulfite oxidase                                                                                               |
| 0,577542892 | 0,00387 | 0,773246337 | 0,00383 | SUSD4      | sushi domain containing 4                                                                                     |
| 0,501388218 | 0,00381 | 0,592135806 | 0,00038 | SUSD4      | sushi domain containing 4                                                                                     |
| 0,552865327 | 0,00188 | 0,652477474 | 0,00026 | SUSD4      | sushi domain containing 4                                                                                     |
| 0,756283999 | 0,02814 | 0,750019495 | 0,00244 | SUV420H1   | suppressor of variegation 4-20 homolog 1 ( <i>Drosophila</i> )                                                |
| 1,299539062 | 0,01739 | 1,362258035 | 0,00016 | SYDE1      | synapse defective 1, Rho GTPase, homolog 1 ( <i>C. elegans</i> )                                              |
| 1,398616083 | 0,02476 | 1,30224419  | 0,00038 | SYDE1      | synapse defective 1, Rho GTPase, homolog 1 ( <i>C. elegans</i> )                                              |
| 0,608783009 | 0,03091 | 0,646176415 | 0       | SYNCRIP    | synaptotagmin binding, cytoplasmic RNA interacting protein                                                    |
| 0,724471077 | 0,02574 | 0,821880187 | 0,00025 | SYNCRIP    | synaptotagmin binding, cytoplasmic RNA interacting protein                                                    |
| 1,469168633 | 0,0295  | 1,373636233 | 0,00696 | SYNE1      | spectrin repeat containing, nuclear envelope 1                                                                |
| 0,654742712 | 0,0055  | 0,817902059 | 0,02113 | SYNE2      | spectrin repeat containing, nuclear envelope 2                                                                |
| 1,341642225 | 0,00649 | 1,193335743 | 0,03756 | SYNE2      | spectrin repeat containing, nuclear envelope 2                                                                |
| 1,597703833 | 0,00649 | 1,223488041 | 0,00118 | SYNGR3     | synaptogyrin 3                                                                                                |
| 1,640345822 | 0,03434 | 1,224336392 | 0,03186 | SYNPO2     | synaptopodin 2                                                                                                |
| 1,777685362 | 0,00142 | 1,568080908 | 0,00049 | SYT11      | synaptotagmin XI                                                                                              |
| 1,223488041 | 0,0449  | 1,199139914 | 0,00561 | SYTL3      | synaptotagmin-like 3                                                                                          |
| 1,872544495 | 0,0005  | 1,5888688   | 0,00015 | SYVN1      | synovial apoptosis inhibitor 1, synoviolin                                                                    |
| 1,25962998  | 0,02795 | 1,136816973 | 0,03144 | TACC1      | transforming, acidic coiled-coil containing protein 1                                                         |
| 0,509798841 | 0,00794 | 0,574349177 | 0       | TACC2      | transforming, acidic coiled-coil containing protein 2                                                         |
| 0,475659138 | 0,00023 | 0,600818025 | 0,00004 | TACC2      | transforming, acidic coiled-coil containing protein 2                                                         |
| 1,385109468 | 0,00485 | 1,289668251 | 0,00546 | TACR2      | tachykinin receptor 2                                                                                         |
| 0,714992493 | 0,0466  | 0,683493726 | 0,00048 | TADA1      | transcriptional adaptor 1                                                                                     |
| 0,784584098 | 0,0427  | 0,739693755 | 0,00001 | TAF1B      | TATA box binding protein (TBP)-associated factor, RNA polymerase I, B, 63kDa                                  |
| 0,723467443 | 0,02827 | 0,753667455 | 0,00023 | TAF1D      | TATA box binding protein (TBP)-associated factor, RNA polymerase I, D, 41kDa                                  |
| 0,686818117 | 0,00211 | 0,714992493 | 0       | TAF5L      | TAF5-like RNA polymerase II, p300/CBP-associated factor (PCAF)-associated factor, 65kDa                       |
| 0,74277646  | 0,02086 | 0,835087919 | 0,00317 | TAF9       | TAF9 RNA polymerase II, TATA box binding protein (TBP)-associated factor, 32kDa                               |
| 0,756283999 | 0,04178 | 0,739693755 | 0,00022 | TAF9       | TAF9 RNA polymerase II, TATA box binding protein (TBP)-associated factor, 32kDa                               |
| 0,73153561  | 0,04194 | 0,847919965 | 0,00867 | TAF9B      | TAF9B RNA polymerase II, TATA box binding protein (TBP)-associated factor, 31kDa                              |
| 2,486299338 | 0,00007 | 1,691144575 | 0,00043 | TAGAP      | T-cell activation RhoGTPase activating protein                                                                |
| 4,623546826 | 0       | 2,365262    | 0,00008 | TAGAP      | T-cell activation RhoGTPase activating protein                                                                |
| 2,808889751 | 0,00002 | 2,051956291 | 0       | TAGAP      | T-cell activation RhoGTPase activating protein                                                                |
| 4,078390732 | 0,0001  | 1,953417058 | 0,00007 | TAGAP      | T-cell activation RhoGTPase activating protein                                                                |
| 1,361314116 | 0,01138 | 1,152686347 | 0,00629 | TAL1       | T-cell acute lymphocytic leukemia 1                                                                           |
| 1,55293775  | 0,01201 | 1,587767862 | 0       | TAPBPL     | TAP binding protein-like                                                                                      |
| 1,650610817 | 0,04732 | 1,56049096  | 0       | TAPBPL     | TAP binding protein-like                                                                                      |
| 0,70514898  | 0,04316 | 0,823591017 | 0,00218 | TARDBP     | TAR DNA binding protein                                                                                       |
| 0,590496331 | 0,0153  | 0,76101669  | 0,01524 | TARDBP     | TAR DNA binding protein                                                                                       |
| 0,691595315 | 0,02643 | 0,70027816  | 0,00001 | TARS       | threonyl-tRNA synthetase                                                                                      |
| 0,628942486 | 0,01866 | 0,713507253 | 0,00002 | TATDN1     | TatD DNase domain containing 1                                                                                |
| 0,776468875 | 0,00717 | 0,844400887 | 0,00127 | TAX1BP3    | Tax1 (human T-cell leukemia virus type I) binding protein 3                                                   |
| 1,640345822 | 0,00091 | 1,422077411 | 0,00024 | TBC1D1     | TBC1 (tre-2/USP6, BUB2, cdc16) domain family, member 1                                                        |
| 1,282536603 | 0,0074  | 1,174461971 | 0,02598 | TBC1D1     | TBC1 (tre-2/USP6, BUB2, cdc16) domain family, member 1                                                        |
| 1,911890635 | 0,0002  | 1,578987773 | 0,00013 | TBC1D10C   | TBC1 domain family, member 10C                                                                                |
| 2,205338326 | 0,00031 | 1,39377239  | 0,0011  | TBC1D9     | TBC1 domain family, member 9 (with GRAM domain)                                                               |
| 1,541142217 | 0,00535 | 1,513616793 | 0,00011 | TBC1D9     | TBC1 domain family, member 9 (with GRAM domain)                                                               |
| 0,717972255 | 0,01457 | 0,806082831 | 0,00156 | TBCE       | tubulin folding cofactor E                                                                                    |
| 0,727994774 | 0,0343  | 0,758383773 | 0,00006 | TBCE       | tubulin folding cofactor E                                                                                    |
| 1,286097483 | 0,0094  | 1,447938172 | 0,00417 | TBCEL      | tubulin folding cofactor E-like                                                                               |
| 0,655651007 | 0,02479 | 0,883927531 | 0,03283 | TBCK       | TBC1 domain containing kinase                                                                                 |

|             |         |             |         |          |                                                                                 |
|-------------|---------|-------------|---------|----------|---------------------------------------------------------------------------------|
| 0,552482242 | 0,03216 | 0,62546454  | 0,00004 | TBL1X    | transducin (beta)-like 1X-linked                                                |
| 0,740719899 | 0,01214 | 0,819604608 | 0,00399 | TBL1X    | transducin (beta)-like 1X-linked                                                |
| 1,365093718 | 0,00239 | 1,223488041 | 0,04772 | TBX2     | T-box 2                                                                         |
| 1,32592576  | 0,01622 | 1,403471726 | 0,00354 | TBX2     | T-box 2                                                                         |
| 1,372684431 | 0,00664 | 1,209994089 | 0,00061 | TBXA2R   | thromboxane A2 receptor                                                         |
| 1,312211255 | 0,01543 | 1,180992661 | 0,0319  | TBXA2R   | thromboxane A2 receptor                                                         |
| 1,22858698  | 0,04955 | 1,191682575 | 0,02012 | TCEA1    | transcription elongation factor A (SII), 1                                      |
| 0,599569957 | 0,00026 | 0,803293997 | 0,03151 | TCEA3    | transcription elongation factor A (SII), 3                                      |
| 0,673616788 | 0,03388 | 0,895025071 | 0,04776 | TCEAL4   | transcription elongation factor A (SII)-like 4                                  |
| 0,791137301 | 0,03661 | 0,841479482 | 0,01886 | TCEB1    | transcription elongation factor B (SIII), polypeptide 1 (15kDa, elongin C)      |
| 1,659789171 | 0,00641 | 1,286989247 | 0,01268 | TCF3     | transcription factor 3 (E2A immunoglobulin enhancer binding factors E12/E47)    |
| 1,516767545 | 0,00714 | 1,312211255 | 0,0009  | TCF3     | transcription factor 3 (E2A immunoglobulin enhancer binding factors E12/E47)    |
| 1,489677463 | 0,00854 | 1,165541198 | 0,0447  | TCF3     | transcription factor 3 (E2A immunoglobulin enhancer binding factors E12/E47)    |
| 1,398616083 | 0,02269 | 1,260503392 | 0,00415 | TCF3     | transcription factor 3 (E2A immunoglobulin enhancer binding factors E12/E47)    |
| 1,574615953 | 0,03391 | 1,322254605 | 0,01103 | TCF4     | transcription factor 4                                                          |
| 1,577893682 | 0,02442 | 1,30224419  | 0,00152 | TCF4     | transcription factor 4                                                          |
| 1,444930398 | 0,00484 | 1,41029796  | 0,00016 | TCL1A    | T-cell leukemia/lymphoma 1A                                                     |
| 2,032140286 | 0,00467 | 1,354724977 | 0,01356 | TCN1     | transcobalamin I (vitamin B12 binding protein, R binder family)                 |
| 1,376495602 | 0,03306 | 1,4054187   | 0,00001 | TCN2     | transcobalamin II                                                               |
| 0,654289036 | 0,00493 | 0,739181216 | 0,03808 | TCP1L2   | t-complex 11 (mouse)-like 2                                                     |
| 1,203303026 | 0,04084 | 1,244874235 | 0,00005 | TCTN3    | tectonic family member 3                                                        |
| 3,773753004 | 0,0001  | 1,986184991 | 0,00002 | TD02     | tryptophan 2,3-dioxygenase                                                      |
| 1,230291345 | 0,01334 | 1,285206337 | 0,00014 | TDRD10   | tudor domain containing 10                                                      |
| 0,720464874 | 0,00491 | 0,841479482 | 0,02232 | TDRD3    | tudor domain containing 3                                                       |
| 0,574349177 | 0,01198 | 0,801625329 | 0,00066 | TDRD3    | tudor domain containing 3                                                       |
| 0,708087719 | 0,02413 | 0,860949188 | 0,01209 | TDRD3    | tudor domain containing 3                                                       |
| 0,664803554 | 0,03037 | 0,813943185 | 0,02889 | TEAD3    | TEA domain family member 3                                                      |
| 1,689972769 | 0,00765 | 1,467133344 | 0,00062 | TEK      | TEK tyrosine kinase, endothelial                                                |
| 1,32317144  | 0,04574 | 1,382232207 | 0,00022 | TEK      | TEK tyrosine kinase, endothelial                                                |
| 0,655196702 | 0,02927 | 0,812252396 | 0,00422 | TEN1     | TEN1 telomerase capping complex subunit homolog (S. cerevisiae)                 |
| 0,695923196 | 0,01529 | 0,716480825 | 0,00012 | TET2     | tet oncogene family member 2                                                    |
| 0,547146851 | 0,01825 | 0,703684188 | 0,00027 | TET2     | tet oncogene family member 2                                                    |
| 0,533662669 | 0,00228 | 0,604577838 | 0,00005 | TET3     | tet oncogene family member 3                                                    |
| 0,682546859 | 0,01535 | 0,819604608 | 0,0472  | TEX101   | testis expressed 101                                                            |
| 0,758909626 | 0,0266  | 0,751580739 | 0       | TEX2     | testis expressed 2                                                              |
| 0,597081594 | 0,01428 | 0,67689314  | 0,00008 | TFAP2A   | transcription factor AP-2 alpha (activating enhancer binding protein 2 alpha)   |
| 0,482968164 | 0,02803 | 0,763129604 | 0,04349 | TFAP2A   | transcription factor AP-2 alpha (activating enhancer binding protein 2 alpha)   |
| 0,584793832 | 0,00059 | 0,659753955 | 0,00005 | TFAP2C   | transcription factor AP-2 gamma (activating enhancer binding protein 2 gamma)   |
| 0,659296807 | 0,02314 | 0,805524291 | 0,03364 | TFAP2C   | transcription factor AP-2 gamma (activating enhancer binding protein 2 gamma)   |
| 0,784584098 | 0,04597 | 0,86934456  | 0,0161  | TFB1M    | transcription factor B1, mitochondrial                                          |
| 0,757858283 | 0,02685 | 0,668500248 | 0,00159 | TFDP1    | transcription factor Dp-1                                                       |
| 1,307671349 | 0,00465 | 1,248330549 | 0,02318 | TFEB     | transcription factor EB                                                         |
| 1,849326556 | 0,00036 | 1,455989549 | 0,0006  | TFEC     | transcription factor EC                                                         |
| 1,413233644 | 0,00876 | 1,300440147 | 0,00575 | TFEC     | transcription factor EC                                                         |
| 1,596596773 | 0,04809 | 1,655193632 | 0,00023 | TFPI     | tissue factor pathway inhibitor (lipoprotein-associated coagulation inhibitor)  |
| 1,313121125 | 0,01    | 1,131314463 | 0,03131 | TGFB2    | transforming growth factor, beta 2                                              |
| 1,333298677 | 0,00841 | 1,094293701 | 0,04769 | TGFB3    | transforming growth factor, beta 3                                              |
| 1,509425969 | 0,03244 | 1,62788637  | 0,00002 | TGFB3    | transforming growth factor, beta 3                                              |
| 0,487002134 | 0,00399 | 0,646624466 | 0,00093 | TGFB3    | transforming growth factor, beta receptor III                                   |
| 1,41029796  | 0,0439  | 1,413233644 | 0,02651 | TGIF1    | TGFB-induced factor homeobox 1                                                  |
| 2,022304162 | 0,00068 | 1,972465409 | 0       | TGM2     | transglutaminase 2 (C polypeptide, protein-glutamine-gamma-glutamyltransferase) |
| 1,242288282 | 0,01288 | 1,208317843 | 0,00049 | TGM2     | transglutaminase 2 (C polypeptide, protein-glutamine-gamma-glutamyltransferase) |
| 0,423372656 | 0,00042 | 0,787307977 | 0,00498 | TGM5     | transglutaminase 5                                                              |
| 0,455019412 | 0,00006 | 0,750539549 | 0,00549 | TGM7     | transglutaminase 7                                                              |
| 0,573951207 | 0,02025 | 0,599569957 | 0       | TGS1     | trimethylguanosine synthase 1                                                   |
| 0,757333158 | 0,03245 | 0,803293997 | 0,01024 | THBD     | thrombospondin                                                                  |
| 1,294145654 | 0,01325 | 1,393777239 | 0,00004 | THEG     | Theg homolog (mouse)                                                            |
| 1,226884977 | 0,0332  | 1,168777249 | 0,00488 | THRSF    | thyroid hormone responsive                                                      |
| 1,286097483 | 0,03378 | 1,312211255 | 0,00529 | THSD7A   | thrombospondin, type 1, domain containing 7A                                    |
| 0,807201075 | 0,04034 | 0,899378312 | 0,04301 | THUMPD3  | THUMP domain containing 3                                                       |
| 0,659753955 | 0,0411  | 0,76630998  | 0,01664 | THUMPD3  | THUMP domain containing 3                                                       |
| 0,482299092 | 0,00425 | 0,745872013 | 0,00015 | TIAM1    | T-cell lymphoma invasion and metastasis 1                                       |
| 1,217566019 | 0,03779 | 1,204137381 | 0,00235 | TIGIT    | T cell immunoreceptor with Ig and ITIM domains                                  |
| 1,367935304 | 0,03897 | 1,218410264 | 0,00418 | TIMD4    | T-cell immunoglobulin and mucin domain containing 4                             |
| 0,67689314  | 0,00251 | 0,817335328 | 0,00147 | TIMM13   | translocase of inner mitochondrial membrane 13 homolog (yeast)                  |
| 0,820172911 | 0,04627 | 0,804408371 | 0,00526 | TIMM8A   | translocase of inner mitochondrial membrane 8 homolog A (yeast)                 |
| 0,785128119 | 0,00893 | 0,871154192 | 0,0127  | TIMM8B   | translocase of inner mitochondrial membrane 8 homolog B (yeast)                 |
| 1,706452196 | 0,00097 | 1,431968741 | 0,00005 | TIMP4    | TIMP metalloproteinase inhibitor 4                                              |
| 1,62788637  | 0,00014 | 1,423063461 | 0,001   | TINAGL1  | tubulointerstitial nephritis antigen-like 1                                     |
| 0,709561678 | 0,04501 | 0,717972255 | 0,00021 | TIPRL    | TIP41, TOR signaling pathway regulator-like (S. cerevisiae)                     |
| 1,192508872 | 0,04948 | 1,159095952 | 0,01943 | TJAP1    | tight junction associated protein 1 (peripheral)                                |
| 0,673150035 | 0,01359 | 0,763658749 | 0,00075 | TJP2     | tight junction protein 2 (zona occludens 2)                                     |
| 0,724471077 | 0,03824 | 0,811127156 | 0,04661 | TJP2     | tight junction protein 2 (zona occludens 2)                                     |
| 1,462057448 | 0,00891 | 1,132098902 | 0,03431 | TK2      | thymidine kinase 2, mitochondrial                                               |
| 0,707106781 | 0,01137 | 0,780786493 | 0,00044 | TLCD2    | TLC domain containing 2                                                         |
| 0,773782497 | 0,02961 | 0,812815602 | 0,00266 | TLCD2    | TLC domain containing 2                                                         |
| 1,364147835 | 0,00184 | 1,146312186 | 0,0357  | TLR10    | toll-like receptor 10                                                           |
| 1,892115293 | 0,00001 | 1,565908593 | 0,0009  | TLR10    | toll-like receptor 10                                                           |
| 1,207480591 | 0,03507 | 1,365093718 | 0,00044 | TLR4     | toll-like receptor 4                                                            |
| 1,336074078 | 0,00184 | 1,35754498  | 0,02023 | TLR4     | toll-like receptor 4                                                            |
| 1,421092043 | 0,00246 | 1,204137381 | 0,04248 | TLR4     | toll-like receptor 4                                                            |
| 1,400556321 | 0,0166  | 1,169587664 | 0,03239 | TLR4     | toll-like receptor 4                                                            |
| 1,881652215 | 0,00149 | 1,494849249 | 0,00174 | TLR8     | toll-like receptor 8                                                            |
| 1,425037614 | 0,01076 | 1,398616083 | 0,00027 | TLR9     | toll-like receptor 9                                                            |
| 1,411275843 | 0,00563 | 1,43296165  | 0,00001 | TM4SF18  | transmembrane 4 L six family member 18                                          |
| 1,297738767 | 0,02017 | 1,172022284 | 0,03442 | TM6SF1   | transmembrane 6 superfamily member 1                                            |
| 0,697855382 | 0,01408 | 0,760489377 | 0,00068 | TM7SF3   | transmembrane 7 superfamily member 3                                            |
| 1,505246747 | 0,03228 | 1,423063461 | 0,00098 | TMC4     | transmembrane channel-like 4                                                    |
| 0,692554734 | 0,00164 | 0,743291492 | 0,01843 | TMC5     | transmembrane channel-like 5                                                    |
| 0,634635443 | 0,00967 | 0,679714121 | 0,00574 | TMC5     | transmembrane channel-like 5                                                    |
| 1,230291345 | 0,03847 | 1,162314108 | 0,00754 | TMC05A   | transmembrane and coiled-coil domains 5A                                        |
| 0,661127303 | 0,0334  | 0,811127156 | 0,00775 | TMED3    | transmembrane emp24 protein transport domain containing 3                       |
| 1,273677475 | 0,03762 | 1,544350266 | 0,00004 | TMEM108  | transmembrane protein 108                                                       |
| 0,575145947 | 0,03495 | 0,608783009 | 0       | TMEM117  | transmembrane protein 117                                                       |
| 0,798298386 | 0,04859 | 0,866937564 | 0,02711 | TMEM121  | transmembrane protein 121                                                       |
| 0,84323111  | 0,02941 | 0,811689581 | 0,00706 | TMEM126A | transmembrane protein 126A                                                      |
| 0,724471077 | 0,02463 | 0,751580739 | 0,00008 | TMEM131  | transmembrane protein 131                                                       |
| 1,844206236 | 0       | 1,589970502 | 0,00002 | TMEM140  | transmembrane protein 140                                                       |

|             |         |             |         |           |                                                                                               |
|-------------|---------|-------------|---------|-----------|-----------------------------------------------------------------------------------------------|
| 0,53998828  | 0,00407 | 0,596667872 | 0,00004 | TMEM14A   | transmembrane protein 14A                                                                     |
| 0,660669203 | 0,01434 | 0,685391402 | 0,00028 | TMEM154   | transmembrane protein 154                                                                     |
| 1,778917987 | 0,00098 | 1,540074348 | 0,00015 | TMEM156   | transmembrane protein 156                                                                     |
| 1,990319444 | 0,00135 | 1,38991822  | 0,00142 | TMEM156   | transmembrane protein 156                                                                     |
| 0,59295725  | 0,03659 | 0,743806881 | 0,04939 | TMEM159   | transmembrane protein 159                                                                     |
| 1,244874235 | 0,04593 | 1,210833084 | 0,00131 | TMEM161A  | transmembrane protein 161A                                                                    |
| 1,293248932 | 0,00921 | 1,320422841 | 0,00011 | TMEM163   | transmembrane protein 163                                                                     |
| 1,487613762 | 0,00432 | 1,179356592 | 0,02014 | TMEM163   | transmembrane protein 163                                                                     |
| 0,696888619 | 0,03967 | 0,715984371 | 0,00073 | TMEM17    | transmembrane protein 17                                                                      |
| 1,839100092 | 0,0034  | 1,840375301 | 0,00001 | TMEM176A  | transmembrane protein 176A                                                                    |
| 2,281527432 | 0,001   | 2,418311352 | 0       | TMEM176B  | transmembrane protein 176B                                                                    |
| 0,790041312 | 0,01432 | 0,830470024 | 0,00102 | TMEM18    | transmembrane protein 18                                                                      |
| 0,509445598 | 0,01787 | 0,608783009 | 0,00263 | TMEM184A  | transmembrane protein 184A                                                                    |
| 1,307671349 | 0,00771 | 1,29145735  | 0,00031 | TMEM184B  | transmembrane protein 184B                                                                    |
| 0,783497187 | 0,0282  | 0,798298386 | 0,01327 | TMEM185A  | transmembrane protein 185A                                                                    |
| 0,628506687 | 0,02042 | 0,822450069 | 0,00458 | TMEM185A  | transmembrane protein 185A                                                                    |
| 1,447938172 | 0,00227 | 1,208317843 | 0,00885 | TMEM198   | transmembrane protein 198                                                                     |
| 1,601029621 | 0,005   | 1,471206746 | 0,00012 | TMEM200C  | transmembrane protein 200C                                                                    |
| 1,489677463 | 0,01014 | 1,371733289 | 0,00033 | TMEM204   | transmembrane protein 204                                                                     |
| 1,396678532 | 0,02412 | 1,194991205 | 0,0085  | TMEM22    | transmembrane protein 22                                                                      |
| 0,604158922 | 0,00099 | 0,688247801 | 0,00016 | TMEM237   | transmembrane protein 237                                                                     |
| 0,498270131 | 0,00228 | 0,597495602 | 0,00008 | TMEM237   | transmembrane protein 237                                                                     |
| 1,33422317  | 0,02038 | 1,269270886 | 0,00746 | TMEM25    | transmembrane protein 25                                                                      |
| 1,426025717 | 0,00283 | 1,274560627 | 0,00117 | TMEM39A   | transmembrane protein 39A                                                                     |
| 1,442928687 | 0,00027 | 1,220946513 | 0,00211 | TMEM39A   | transmembrane protein 39A                                                                     |
| 0,539614118 | 0,00168 | 0,693034943 | 0,00071 | TMEM40    | transmembrane protein 40                                                                      |
| 0,557483109 | 0,00016 | 0,750539549 | 0,00771 | TMEM40    | transmembrane protein 40                                                                      |
| 0,680657058 | 0,02147 | 0,818469182 | 0,01787 | TMEM41A   | transmembrane protein 41A                                                                     |
| 0,623300597 | 0,01827 | 0,855595026 | 0,04926 | TMEM43    | transmembrane protein 43                                                                      |
| 0,6341957   | 0,00487 | 0,587638164 | 0       | TMEM43    | transmembrane protein 43                                                                      |
| 0,740206649 | 0,01826 | 0,806082831 | 0,03235 | TMEM45B   | transmembrane protein 45B                                                                     |
| 0,505926601 | 0,01379 | 0,804408371 | 0,01976 | TMEM54    | transmembrane protein 54                                                                      |
| 1,781385801 | 0,00012 | 1,429984986 | 0,0043  | TMEM56    | transmembrane protein 56                                                                      |
| 0,751580739 | 0,01867 | 0,741747467 | 0,00169 | TMEM64    | transmembrane protein 64                                                                      |
| 1,593280193 | 0,00733 | 1,36983298  | 0,02108 | TMEM71    | transmembrane protein 71                                                                      |
| 0,383952567 | 0,0012  | 0,61301743  | 0,00018 | TMEM79    | transmembrane protein 79                                                                      |
| 0,657927263 | 0,03054 | 0,839149637 | 0,0144  | TMEM87A   | transmembrane protein 87A                                                                     |
| 0,758909626 | 0,01755 | 0,810003474 | 0,00511 | TMEM87A   | transmembrane protein 87A                                                                     |
| 1,225185332 | 0,02825 | 1,174461971 | 0,01457 | TMEM88    | transmembrane protein 88                                                                      |
| 1,576800348 | 0,00813 | 1,312211255 | 0,00441 | TMEM8A    | transmembrane protein 8A                                                                      |
| 1,261377409 | 0,01324 | 1,20163605  | 0,00103 | TMEM8A    | transmembrane protein 8A                                                                      |
| 1,230291345 | 0,01395 | 1,199139914 | 0,02556 | TMEM91    | transmembrane protein 91                                                                      |
| 0,721464343 | 0,00337 | 0,788946841 | 0,00029 | TMEM9B    | TMEM9 domain family, member B                                                                 |
| 0,395842933 | 0,00276 | 0,683020128 | 0,00185 | TMPRSS11D | transmembrane protease, serine 11D                                                            |
| 0,566441943 | 0,00437 | 0,754190038 | 0,00402 | TMPRSS13  | transmembrane protease, serine 13                                                             |
| 1,702907415 | 0,03452 | 1,510472586 | 0,02925 | TMPRSS2   | transmembrane protease, serine 2                                                              |
| 1,642621402 | 0,00754 | 1,464085696 | 0,00337 | TMPRSS2   | transmembrane protease, serine 2                                                              |
| 1,310393404 | 0,01833 | 1,152686347 | 0,01384 | TMPRSS3   | transmembrane protease, serine 3                                                              |
| 1,41029796  | 0,02999 | 1,141554707 | 0,02892 | TMTC1     | transmembrane and tetra-ricopeptide repeat containing 1                                       |
| 1,21167266  | 0,01605 | 1,159095952 | 0,01033 | TNAP      | TRAFs and NIK-associated protein                                                              |
| 0,725476104 | 0,03764 | 0,735093668 | 0,03649 | TNC       | tenascin C                                                                                    |
| 0,61985385  | 0,00555 | 0,635515845 | 0,00155 | TNC       | tenascin C                                                                                    |
| 1,215036792 | 0,04162 | 1,304050735 | 0,00069 | TNFAIP8L2 | tumor necrosis factor, alpha-induced protein 8-like 2                                         |
| 1,620006947 | 0,01071 | 1,246601194 | 0,01248 | TNFRSF10C | tumor necrosis factor receptor superfamily, member 10C, decoy without an intracellular domain |
| 1,692317193 | 0,00323 | 1,508380077 | 0,00295 | TNFRSF10C | tumor necrosis factor receptor superfamily, member 10C, decoy without an intracellular domain |
| 1,350037985 | 0,02557 | 1,230291345 | 0,02482 | TNFRSF10C | tumor necrosis factor receptor superfamily, member 10C, decoy without an intracellular domain |
| 1,394743666 | 0,03125 | 1,151887642 | 0,02837 | TNFRSF10D | tumor necrosis factor receptor superfamily, member 10d, decoy with truncated death domain     |
| 1,307671349 | 0,02565 | 1,148698355 | 0,0171  | TNFRSF14  | tumor necrosis factor receptor superfamily, member 14                                         |
| 5,183763862 | 0,00003 | 3,747685787 | 0,00017 | TNFRSF17  | tumor necrosis factor receptor superfamily, member 17                                         |
| 0,434973676 | 0,02232 | 0,50557604  | 0,0002  | TNFRSF19  | tumor necrosis factor receptor superfamily, member 19                                         |
| 1,608816742 | 0,00447 | 1,510472586 | 0,00037 | TNFRSF1B  | tumor necrosis factor receptor superfamily, member 1B                                         |
| 0,837987135 | 0,0276  | 0,902500727 | 0,04391 | TNFRSF25  | tumor necrosis factor receptor superfamily, member 25                                         |
| 1,477338064 | 0,01244 | 1,378405153 | 0,00005 | TNFSF13   | tumor necrosis factor (ligand) superfamily, member 13                                         |
| 1,505246747 | 0,01434 | 1,537940831 | 0,00287 | TNFSF13B  | tumor necrosis factor (ligand) superfamily, member 13b                                        |
| 1,618884433 | 0,00056 | 1,292352831 | 0,00054 | TNIP1     | TNFAIP3 interacting protein 1                                                                 |
| 1,938579634 | 0,00004 | 1,456999114 | 0,00009 | TNS3      | tensin 3                                                                                      |
| 0,744322628 | 0,02727 | 0,727490342 | 0,00069 | TOB2      | transducer of ERBB2, 2                                                                        |
| 0,675487042 | 0,01846 | 0,753145233 | 0,00136 | TOLLIP    | toll interacting protein                                                                      |
| 0,768970416 | 0,01693 | 0,801625329 | 0,01723 | TOLLIP    | toll interacting protein                                                                      |
| 0,51370072  | 0,02277 | 0,564873607 | 0,00026 | TOM1L1    | target of myb1 (chicken)-like 1                                                               |
| 0,67689314  | 0,00072 | 0,78132788  | 0,00259 | TOM1L1    | target of myb1 (chicken)-like 1                                                               |
| 0,543744195 | 0,0048  | 0,708087719 | 0,00021 | TOMM20    | translocase of outer mitochondrial membrane 20 homolog (yeast)                                |
| 0,716480825 | 0,0367  | 0,751580739 | 0,00008 | TOMM20    | translocase of outer mitochondrial membrane 20 homolog (yeast)                                |
| 0,775930854 | 0,04039 | 0,872362706 | 0,04168 | TOMM70A   | translocase of outer mitochondrial membrane 70 homolog A (S. cerevisiae)                      |
| 0,470087101 | 0,00695 | 0,522317881 | 0       | TOP1      | topoisomerase (DNA) I                                                                         |
| 0,454389058 | 0,04273 | 0,747424624 | 0,0024  | TOP2A     | topoisomerase (DNA) II alpha 170kDa                                                           |
| 1,261377409 | 0,01084 | 1,25962998  | 0,0003  | TOR2A     | torsin family 2, member A                                                                     |
| 1,577893682 | 0,02857 | 1,381274448 | 0,00087 | TOR3A     | torsin family 3, member A                                                                     |
| 1,626758396 | 0,00537 | 1,193335743 | 0,02355 | TOX2      | TOX high mobility group box family member 2                                                   |
| 0,723969086 | 0,04814 | 0,745355193 | 0,0004  | TOX4      | TOX high mobility group box family member 4                                                   |
| 0,465870215 | 0,00046 | 0,658839976 | 0,0002  | TP53AIP1  | tumor protein p53 regulated apoptosis inducing protein 1                                      |
| 0,40332088  | 0,00006 | 0,695923196 | 0,00152 | TP53AIP1  | tumor protein p53 regulated apoptosis inducing protein 1                                      |
| 1,913216316 | 0,001   | 1,689972769 | 0,00092 | TP53INP1  | tumor protein p53 inducible nuclear protein 1                                                 |
| 1,484523571 | 0,00328 | 1,347233577 | 0,00793 | TP53INP1  | tumor protein p53 inducible nuclear protein 1                                                 |
| 0,488354264 | 0,01877 | 0,652477474 | 0,01444 | TP63      | tumor protein p63                                                                             |
| 0,695440986 | 0,00581 | 0,774319028 | 0,00988 | TPD52     | tumor protein D52                                                                             |
| 0,81056512  | 0,02663 | 0,778085177 | 0,00052 | TPD52L1   | tumor protein D52-like 1                                                                      |
| 1,508380077 | 0,00936 | 1,222640278 | 0,00802 | TPK1      | thiamin pyrophosphokinase 1                                                                   |
| 1,254402205 | 0,02053 | 1,197478705 | 0,00091 | TPM4      | tropomyosin 4                                                                                 |
| 0,691595315 | 0,03813 | 0,764718139 | 0,01635 | TPM4      | tropomyosin 4                                                                                 |
| 0,492092011 | 0,00838 | 0,60332196  | 0,00002 | TPPP      | tubulin polymerization promoting protein                                                      |
| 0,368311921 | 0,0006  | 0,595841287 | 0,00539 | TPPP3     | tubulin polymerization-promoting protein family member 3                                      |
| 0,485653748 | 0,01716 | 0,552865327 | 0,0006  | TPR       | translocated promoter region (to activated MET oncogene)                                      |
| 0,582366793 | 0,02385 | 0,888226796 | 0,02828 | TPR       | translocated promoter region (to activated MET oncogene)                                      |
| 0,604997045 | 0,0216  | 0,770037174 | 0,02487 | TPRG1     | tumor protein p63 regulated 1                                                                 |
| 0,597909898 | 0,01008 | 0,702222438 | 0,00114 | TPRKB     | TP53RK binding protein                                                                        |
| 1,691144575 | 0,0001  | 1,477338064 | 0,00034 | TPST2     | tyrosylprotein sulfotransferase 2                                                             |
| 0,779704843 | 0,0339  | 0,844986384 | 0,00008 | TRA2B     | transformer 2 beta homolog (Drosophila)                                                       |

|             |         |             |         |          |                                                                    |
|-------------|---------|-------------|---------|----------|--------------------------------------------------------------------|
| 1,295940965 | 0,01731 | 1,156688184 | 0,04374 | TRAF1    | TNF receptor-associated factor 1                                   |
| 0,86934456  | 0,04945 | 0,888226796 | 0,0469  | TRAF3IP1 | TNF receptor-associated factor 3 interacting protein 1             |
| 1,480413298 | 0,00571 | 1,203303026 | 0,02901 | TRAF3IP3 | TRAF3 interacting protein 3                                        |
| 1,935894054 | 0,00152 | 1,473247686 | 0,01047 | TRAF3IP3 | TRAF3 interacting protein 3                                        |
| 1,397646972 | 0,01245 | 1,280759861 | 0,00575 | TRAF4    | TNF receptor-associated factor 4                                   |
| 1,559409685 | 0,02411 | 1,250062303 | 0,00289 | TRAM1    | translocation associated membrane protein 1                        |
| 1,275444392 | 0,03879 | 1,273677475 | 0,00198 | TRANK1   | tetratricopeptide repeat and ankyrin repeat containing 1           |
| 1,167967395 | 0,04766 | 1,273677475 | 0,00053 | TRAPP2L  | trafficking protein particle complex 2-like                        |
| 0,674551267 | 0,02527 | 0,756808396 | 0,00383 | TRAPP6B  | trafficking protein particle complex 6B                            |
| 1,43296165  | 0,01623 | 1,245067298 | 0,03299 | TRAT1    | T cell receptor associated transmembrane adaptor 1                 |
| 1,659789171 | 0,00133 | 1,310393404 | 0,00989 | TRDV2    | T cell receptor delta variable 2                                   |
| 1,32317144  | 0,03369 | 1,189207115 | 0,01508 | TREML2P1 | triggering receptor expressed on myeloid cells-like 2 pseudogene 1 |
| 0,76418826  | 0,01791 | 0,911933166 | 0,04637 | TREX1    | three prime repair exonuclease 1                                   |
| 0,770571108 | 0,01283 | 0,853226098 | 0,00202 | TRIP1    | TP53 regulated inhibitor of apoptosis 1                            |
| 1,851892045 | 0,00079 | 1,359428242 | 0,03892 | TRIB1    | tribbles homolog 1 (Drosophila)                                    |
| 1,413233644 | 0,03788 | 1,237990291 | 0,00503 | TRIB3    | tribbles homolog 3 (Drosophila)                                    |
| 0,738157203 | 0,01496 | 0,799960128 | 0,00563 | TRIM16L  | tripartite motif containing 16-like                                |
| 1,4054187   | 0,00161 | 1,257884972 | 0,00058 | TRIM27   | tripartite motif containing 27                                     |
| 1,269270886 | 0,03463 | 1,190856849 | 0,00152 | TRIM27   | tripartite motif containing 27                                     |
| 0,456282744 | 0,04943 | 0,833353207 | 0,01656 | TRIM29   | tripartite motif containing 29                                     |
| 0,629378587 | 0,01148 | 0,655196702 | 0,00009 | TRIM4    | tripartite motif containing 4                                      |
| 1,458009379 | 0,00458 | 1,25962998  | 0,01598 | TRIM69   | tripartite motif containing 69                                     |
| 0,517273791 | 0,00036 | 0,594191553 | 0,00003 | TRIM7    | tripartite motif containing 7                                      |
| 0,470413054 | 0,00218 | 0,671751713 | 0,00017 | TRIM7    | tripartite motif containing 7                                      |
| 0,768970416 | 0,03654 | 0,90000193  | 0,0302  | TRIP12   | thyroid hormone receptor interactor 12                             |
| 0,730522189 | 0,03846 | 0,788400174 | 0,00261 | TRIP4    | thyroid hormone receptor interactor 4                              |
| 0,679714121 | 0,03895 | 0,823591017 | 0,00024 | TRIT1    | tRNA isopentenyltransferase 1                                      |
| 0,767373048 | 0,02161 | 0,795536484 | 0,00002 | TRMT12   | tRNA methyltransferase 12 homolog (S. cerevisiae)                  |
| 1,543280175 | 0,00315 | 1,495885758 | 0,00015 | TRMT2B   | TRM2 tRNA methyltransferase 2 homolog B (S. cerevisiae)            |
| 0,697855382 | 0,00146 | 0,812815602 | 0,00221 | TRMT5    | TRM5 tRNA methyltransferase 5 homolog (S. cerevisiae)              |
| 0,756283999 | 0,02317 | 0,690637224 | 0,00002 | TRMT6    | tRNA methyltransferase 6 homolog (S. cerevisiae)                   |
| 0,764718139 | 0,00795 | 0,821310701 | 0,00301 | TRNP1    | TMF1-regulated nuclear protein 1                                   |
| 1,542210825 | 0,00862 | 1,441928871 | 0,00003 | TRPM6    | transient receptor potential cation channel, subfamily M, member 6 |
| 0,4248425   | 0,00828 | 0,557483109 | 0       | TRPS1    | trichorhinophalangeal syndrome I                                   |
| 0,421323415 | 0,00038 | 0,624165274 | 0       | TRPS1    | trichorhinophalangeal syndrome I                                   |
| 0,466193243 | 0,00828 | 0,483973513 | 0,00041 | TRPS1    | trichorhinophalangeal syndrome I                                   |
| 0,753145233 | 0,04465 | 0,746389192 | 0,00318 | TRPS1    | trichorhinophalangeal syndrome I                                   |
| 1,244874235 | 0,03603 | 1,313121125 | 0,00153 | TRPV5    | transient receptor potential cation channel, subfamily V, member 5 |
| 1,735077374 | 0,01882 | 1,534746096 | 0,00001 | TSC2D3   | TSC2 domain family, member 3                                       |
| 1,313121125 | 0,04147 | 1,250062303 | 0,00299 | TSGA13   | testis specific, 13                                                |
| 1,333298677 | 0,01292 | 1,163926534 | 0,02141 | TSHZ3    | teashirt zinc finger homeobox 3                                    |
| 1,436940177 | 0,01564 | 1,296839555 | 0,00022 | TSPAN1   | tetraspanin 1                                                      |
| 1,76418273  | 0,00119 | 1,528376521 | 0,00115 | TSPAN11  | tetraspanin 11                                                     |
| 2,086377187 | 0,00196 | 1,351910833 | 0,00388 | TSPAN12  | tetraspanin 12                                                     |
| 1,860899315 | 0,00006 | 1,32317144  | 0,00024 | TSPAN13  | tetraspanin 13                                                     |
| 1,503161478 | 0,00093 | 1,472226862 | 0,00003 | TSPAN18  | tetraspanin 18                                                     |
| 1,293248932 | 0,00533 | 1,328685814 | 0,00002 | TSPAN32  | tetraspanin 32                                                     |
| 1,267512522 | 0,04978 | 1,215036792 | 0,0024  | TSPAN32  | tetraspanin 32                                                     |
| 0,50697974  | 0,02434 | 0,656560563 | 0,00003 | TSPAN5   | tetraspanin 5                                                      |
| 0,638164384 | 0,00095 | 0,773782497 | 0,00085 | TSPAN5   | tetraspanin 5                                                      |
| 1,285206337 | 0,01602 | 1,280759861 | 0,00124 | TSPAN7   | tetraspanin 7                                                      |
| 0,503477775 | 0,03537 | 0,788400174 | 0,00581 | TSR1     | TSR1, 20S rRNA accumulation, homolog (S. cerevisiae)               |
| 0,71449707  | 0,00562 | 0,753667455 | 0,00025 | TSR1     | TSR1, 20S rRNA accumulation, homolog (S. cerevisiae)               |
| 0,543744195 | 0,00027 | 0,627635996 | 0       | TSR1     | TSR1, 20S rRNA accumulation, homolog (S. cerevisiae)               |
| 0,640379931 | 0,00724 | 0,821880187 | 0,00803 | TST      | thiosulfate sulfurtransferase (rhodanese)                          |
| 0,642157904 | 0,02468 | 0,815072332 | 0,00009 | TTC19    | tetratricopeptide repeat domain 19                                 |
| 0,652929894 | 0,02609 | 0,747942879 | 0,00388 | TTC22    | tetratricopeptide repeat domain 22                                 |
| 0,589678296 | 0,00755 | 0,759435845 | 0,00707 | TTC35    | tetratricopeptide repeat domain 35                                 |
| 0,527045712 | 0,00025 | 0,59379833  | 0,00015 | TTC39A   | tetratricopeptide repeat domain 39A                                |
| 0,587230986 | 0,00071 | 0,700763725 | 0,00106 | TTC39C   | tetratricopeptide repeat domain 39C                                |
| 0,559806444 | 0,00882 | 0,777546036 | 0,00181 | TTL      | tubulin tyrosine ligase                                            |
| 1,237132479 | 0,04503 | 1,303147149 | 0,00017 | TUB      | tubby homolog (mouse)                                              |
| 0,754712984 | 0,04688 | 0,871154192 | 0,02971 | TUBA3C   | tubulin, alpha 3c                                                  |
| 0,452816992 | 0,0024  | 0,70514898  | 0,00027 | TUBA4A   | tubulin, alpha 4a                                                  |
| 0,76101669  | 0,04645 | 0,819604608 | 0,00157 | TUBA4B   | tubulin, alpha 4b (pseudogene)                                     |
| 0,532185091 | 0,00359 | 0,60583633  | 0       | TUBB2A   | tubulin, beta 2A                                                   |
| 0,650670928 | 0,0441  | 0,754190038 | 0,00532 | TUBB3    | tubulin, beta 3                                                    |
| 0,668037039 | 0,01037 | 0,788400174 | 0,00482 | TUBGCP5  | tubulin, gamma complex associated protein 5                        |
| 0,488692883 | 0,00986 | 0,646176415 | 0,00002 | TUFT1    | tuftelin 1                                                         |
| 1,382232207 | 0,03442 | 1,378405153 | 0,00083 | TUSC3    | tumor suppressor candidate 3                                       |
| 0,674083866 | 0,02538 | 0,713012859 | 0,00039 | TWISTNB  | TWIST neighbor                                                     |
| 1,344434994 | 0,00589 | 1,185092771 | 0,02172 | TXLNB    | taxilin beta                                                       |
| 0,457232545 | 0,00009 | 0,691595315 | 0,00019 | TXN      | thioredoxin                                                        |
| 1,954771533 | 0,00752 | 1,756860936 | 0,00002 | TXNDC11  | thioredoxin domain containing 11                                   |
| 1,956126947 | 0,00052 | 1,626758396 | 0,00002 | TXNDC15  | thioredoxin domain containing 15                                   |
| 1,467133344 | 0,00059 | 1,216722359 | 0,03297 | TXNDC15  | thioredoxin domain containing 15                                   |
| 1,222640278 | 0,04942 | 1,16634937  | 0,01108 | TXNDC3   | thioredoxin domain containing 3 (spermatozoa)                      |
| 0,790589117 | 0,02141 | 0,684441907 | 0,00038 | TXNL1    | thioredoxin-like 1                                                 |
| 0,685391402 | 0,03582 | 0,791685866 | 0,00495 | TYRO3    | TYRO3 protein tyrosine kinase                                      |
| 0,672683604 | 0,04714 | 0,837987135 | 0,01977 | UBAC1    | UBA domain containing 1                                            |
| 0,743291492 | 0,03241 | 0,813943185 | 0,00403 | UBAP2    | ubiquitin associated protein 2                                     |
| 0,798298386 | 0,02153 | 0,71449707  | 0,00004 | UBE2E3   | ubiquitin-conjugating enzyme E2E 3                                 |
| 0,788400174 | 0,04359 | 0,855002178 | 0,04289 | UBE2I    | ubiquitin-conjugating enzyme E2I                                   |
| 0,812815602 | 0,01132 | 0,8362464   | 0,01199 | UBE2I    | ubiquitin-conjugating enzyme E2I                                   |
| 1,413233644 | 0,01406 | 1,175276328 | 0,02625 | UBE2J1   | ubiquitin-conjugating enzyme E2, J1, U                             |
| 1,875142193 | 0,003   | 1,221793102 | 0,04622 | UBE2J1   | ubiquitin-conjugating enzyme E2, J1, U                             |
| 0,780786493 | 0,01326 | 0,784040454 | 0,0001  | UBE2K    | ubiquitin-conjugating enzyme E2K                                   |
| 0,62676651  | 0,0069  | 0,820741609 | 0,0005  | UBE2K    | ubiquitin-conjugating enzyme E2K                                   |
| 0,541112322 | 0,00323 | 0,650670928 | 0,00006 | UBE2V2   | ubiquitin-conjugating enzyme E2 variant 2                          |
| 0,594603558 | 0,0081  | 0,806082831 | 0,00012 | UBE3C    | ubiquitin protein ligase E3C                                       |
| 0,672217497 | 0,02195 | 0,820741609 | 0,00015 | UBE4A    | ubiquitination factor E4A                                          |
| 0,670356296 | 0,00554 | 0,824162085 | 0,04151 | UBE4B    | ubiquitination factor E4B                                          |
| 0,829319546 | 0,03311 | 0,857376037 | 0,00298 | UBL5     | ubiquitin-like 5                                                   |
| 0,543367431 | 0,00048 | 0,664342907 | 0,00004 | UCHL3    | ubiquitin carboxyl-terminal esterase L3 (ubiquitin thiolesterase)  |
| 1,828930179 | 0,00586 | 1,831467373 | 0,00001 | UCP2     | uncoupling protein 2 (mitochondrial, proton carrier)               |
| 1,983433461 | 0,01281 | 1,691144575 | 0,0032  | UCP2     | uncoupling protein 2 (mitochondrial, proton carrier)               |
| 0,652025368 | 0,02922 | 0,865136691 | 0,00404 | UFC1     | ubiquitin-fold modifier conjugating enzyme 1                       |
| 0,729004689 | 0,02979 | 0,852044095 | 0,00275 | UFD1L    | ubiquitin fusion degradation 1 like (yeast)                        |

|             |         |             |         |          |                                                                        |
|-------------|---------|-------------|---------|----------|------------------------------------------------------------------------|
| 0,607939642 | 0,00468 | 0,797192477 | 0,00018 | UFSP2    | UFM1-specific peptidase 2                                              |
| 1,849326556 | 0,03374 | 1,433955248 | 0,00393 | UGT2B17  | UDP glucuronosyltransferase 2 family, polypeptide B17                  |
| 0,581560021 | 0,00261 | 0,737134609 | 0,02209 | ULBP2    | UL16 binding protein 2                                                 |
| 0,583174685 | 0,00059 | 0,76630998  | 0,00675 | ULK3     | unc-51-like kinase 3 (C. elegans)                                      |
| 0,803293997 | 0,04148 | 1,265756594 | 0,00006 | ULK4     | unc-51-like kinase 4 (C. elegans)                                      |
| 0,698823486 | 0,01201 | 0,815072332 | 0,00189 | UMPS     | uridine monophosphate synthetase                                       |
| 0,758383773 | 0,02477 | 0,871154192 | 0,01052 | UMPS     | uridine monophosphate synthetase                                       |
| 0,571569168 | 0,00259 | 0,764718139 | 0,00016 | UNC13B   | unc-13 homolog B (C. elegans)                                          |
| 0,678302164 | 0,00492 | 0,637280314 | 0,00001 | UNG      | uracil-DNA glycosylase                                                 |
| 0,754712984 | 0,04614 | 0,89688816  | 0,02551 | UQCRB    | ubiquinol-cytochrome c reductase binding protein                       |
| 0,721464343 | 0,01841 | 0,882702996 | 0,02501 | UQCRC2   | ubiquinol-cytochrome c reductase core protein II                       |
| 1,350974085 | 0,01253 | 1,172022284 | 0,00385 | URB1     | URB1 ribosome biogenesis 1 homolog (S. cerevisiae)                     |
| 0,841479482 | 0,03752 | 0,868742185 | 0,0343  | URB2     | URB2 ribosome biogenesis 2 homolog (S. cerevisiae)                     |
| 0,535515412 | 0,0009  | 0,794985251 | 0,00923 | USP12    | ubiquitin specific peptidase 12                                        |
| 0,581560021 | 0,00153 | 0,570381858 | 0,00011 | USP2     | ubiquitin specific peptidase 2                                         |
| 0,632878297 | 0,01273 | 0,825305409 | 0,02391 | USP2     | ubiquitin specific peptidase 2                                         |
| 0,679243142 | 0,0251  | 0,731028724 | 0,00579 | USP24    | ubiquitin specific peptidase 24                                        |
| 0,614719434 | 0,00969 | 0,85027416  | 0,00939 | USP24    | ubiquitin specific peptidase 24                                        |
| 0,785672517 | 0,0244  | 0,842062954 | 0,00465 | USP3     | ubiquitin specific peptidase 3                                         |
| 0,762072415 | 0,02682 | 0,793883931 | 0,00198 | USP47    | ubiquitin specific peptidase 47                                        |
| 0,704172113 | 0,02952 | 0,628071191 | 0,00063 | USP53    | ubiquitin specific peptidase 53                                        |
| 0,673150035 | 0,01901 | 0,515484159 | 0,00002 | USP53    | ubiquitin specific peptidase 53                                        |
| 0,610473256 | 0,00642 | 0,730016005 | 0,00057 | USP54    | ubiquitin specific peptidase 54                                        |
| 0,648419777 | 0,021   | 0,788946841 | 0,00011 | USP7     | ubiquitin specific peptidase 7 (herpes virus-associated)               |
| 0,563309614 | 0,0011  | 0,683020128 | 0,00001 | UTP11L   | UTP11-like, U3 small nucleolar ribonucleoprotein, (yeast)              |
| 0,676424116 | 0,0061  | 0,747424624 | 0,00022 | UTP14A   | UTP14, U3 small nucleolar ribonucleoprotein, homolog A (yeast)         |
| 0,785128119 | 0,04903 | 0,759962428 | 0,00001 | UTP18    | UTP18, small subunit (SSU) processome component, homolog (yeast)       |
| 1,851892045 | 0,00596 | 1,476314406 | 0,00632 | VAMP1    | vesicle-associated membrane protein 1 (synaptobrevin 1)                |
| 0,642603169 | 0,04987 | 0,87539133  | 0,00148 | VAMP3    | vesicle-associated membrane protein 3 (cellubrevin)                    |
| 0,582770599 | 0,02927 | 0,860352631 | 0,01434 | VAMP8    | vesicle-associated membrane protein 8 (endobrevin)                     |
| 0,693034943 | 0,03378 | 0,808881348 | 0,0002  | VANGL1   | vang-like 1 (van gogh, Drosophila)                                     |
| 0,600401714 | 0,02484 | 0,789493887 | 0,04662 | VANGL2   | vang-like 2 (van gogh, Drosophila)                                     |
| 0,627635996 | 0,00168 | 0,729510172 | 0,00244 | VAPA     | VAMP (vesicle-associated membrane protein)-associated protein A, 33kDa |
| 0,737134609 | 0,0165  | 0,77916458  | 0,0037  | VAPB     | VAMP (vesicle-associated membrane protein)-associated protein B and C  |
| 1,557249382 | 0,01763 | 1,486582984 | 0,00003 | VAV1     | vav 1 guanine nucleotide exchange factor                               |
| 0,432868283 | 0,00133 | 0,66296288  | 0,02272 | VAV3     | vav 3 guanine nucleotide exchange factor                               |
| 0,483303049 | 0,00502 | 0,639492791 | 0,00289 | VAV3     | vav 3 guanine nucleotide exchange factor                               |
| 0,3515983   | 0,01069 | 0,632001549 | 0,04774 | VAV3     | vav 3 guanine nucleotide exchange factor                               |
| 0,743806881 | 0,02672 | 0,723969086 | 0,00004 | VBP1     | von Hippel-Lindau binding protein 1                                    |
| 0,683493726 | 0,03794 | 0,856781955 | 0,0039  | VDAC2    | voltage-dependent anion channel 2                                      |
| 1,22010051  | 0,0492  | 1,159095952 | 0,00529 | VEPH1    | ventricular zone expressed PH domain homolog 1 (zebrafish)             |
| 1,371733289 | 0,04801 | 1,131314463 | 0,04638 | VHL      | von Hippel-Lindau tumor suppressor                                     |
| 1,226884977 | 0,02035 | 1,335148303 | 0,00045 | VIL1     | villin 1                                                               |
| 1,298638603 | 0,01269 | 1,140763716 | 0,00523 | VIPR2    | vasoactive intestinal peptide receptor 2                               |
| 0,596667872 | 0,01478 | 0,790589117 | 0,00552 | VKORC1L1 | vitamin K epoxide reductase complex, subunit 1-like 1                  |
| 0,630688704 | 0,04089 | 0,728499557 | 0,00309 | VLDLR    | very low density lipoprotein receptor                                  |
| 1,64832417  | 0,00016 | 1,549711862 | 0,00013 | VMO1     | vitelline membrane outer layer 1 homolog (chicken)                     |
| 2,020902893 | 0,00003 | 1,616641738 | 0,00039 | VNN2     | vanin 2                                                                |
| 2,191623533 | 0,00011 | 1,664397469 | 0,00002 | VOPP1    | vesicular, overexpressed in cancer, prosurvival protein 1              |
| 1,433955248 | 0,01367 | 1,317679952 | 0,00022 | VPREB3   | pre-B lymphocyte 3                                                     |
| 0,65747138  | 0,04088 | 0,718968266 | 0,00106 | VPS13A   | vacuolar protein sorting 13 homolog A (S. cerevisiae)                  |
| 1,647182035 | 0,03788 | 1,380317353 | 0,00945 | VPS13C   | vacuolar protein sorting 13 homolog C (S. cerevisiae)                  |
| 2,023706402 | 0,00777 | 1,440929749 | 0,0087  | VPS13C   | vacuolar protein sorting 13 homolog C (S. cerevisiae)                  |
| 0,709561678 | 0,00326 | 0,828744904 | 0,00031 | VPS13D   | vacuolar protein sorting 13 homolog D (S. cerevisiae)                  |
| 0,549046407 | 0,00005 | 0,789493887 | 0,01514 | VPS13D   | vacuolar protein sorting 13 homolog D (S. cerevisiae)                  |
| 0,590496331 | 0,00302 | 0,780786493 | 0,00012 | VPS13D   | vacuolar protein sorting 13 homolog D (S. cerevisiae)                  |
| 0,636838738 | 0,00112 | 0,843815796 | 0,01697 | VPS24    | vacuolar protein sorting 24 homolog (S. cerevisiae)                    |
| 0,644834125 | 0,01528 | 0,848507902 | 0,003   | VPS24    | vacuolar protein sorting 24 homolog (S. cerevisiae)                    |
| 0,643494624 | 0,00377 | 0,76684133  | 0,00011 | VPS26A   | vacuolar protein sorting 26 homolog A (S. pombe)                       |
| 0,812252396 | 0,03164 | 0,8362464   | 0,01886 | VPS29    | vacuolar protein sorting 29 homolog (S. cerevisiae)                    |
| 0,584388624 | 0,03632 | 0,871154192 | 0,02037 | VPS35    | vacuolar protein sorting 35 homolog (S. cerevisiae)                    |
| 0,691595315 | 0,04621 | 0,901875378 | 0,02294 | VPS45    | vacuolar protein sorting 45 homolog (S. cerevisiae)                    |
| 0,70027816  | 0,02776 | 0,727490342 | 0,00011 | VPS54    | vacuolar protein sorting 54 homolog (S. cerevisiae)                    |
| 0,551334582 | 0,00434 | 0,710546022 | 0,00037 | VSNL1    | visinin-like 1                                                         |
| 0,352086057 | 0,00352 | 0,665264521 | 0,00348 | VSNL1    | visinin-like 1                                                         |
| 0,673616788 | 0,02089 | 0,753667455 | 0,00011 | VTA1     | Vps20-associated 1 homolog (S. cerevisiae)                             |
| 1,387030969 | 0,00408 | 1,352848231 | 0,00526 | VWA3A    | von Willebrand factor A domain containing 3A                           |
| 1,33422317  | 0,04223 | 1,184271612 | 0,03031 | VWA5B2   | von Willebrand factor A domain containing 5B2                          |
| 1,2397077   | 0,04477 | 1,193335743 | 0,00563 | VWF      | von Willebrand factor                                                  |
| 0,680657058 | 0,00029 | 0,833353207 | 0,03432 | WARS2    | tryptophanyl tRNA synthetase 2, mitochondrial                          |
| 1,525201653 | 0,00145 | 1,386069886 | 0,00004 | WAS      | Wiskott-Aldrich syndrome (eczema-thrombocytopenia)                     |
| 0,691116103 | 0,01699 | 0,831045862 | 0,02353 | WASL     | Wiskott-Aldrich syndrome-like                                          |
| 0,706616822 | 0,03639 | 0,724471077 | 0,00006 | WBP4     | WW domain binding protein 4 (formin binding protein 21)                |
| 0,571569168 | 0,01937 | 0,683967652 | 0,00001 | WDFY2    | WD repeat and FYVE domain containing 2                                 |
| 0,652025368 | 0,00398 | 0,796640096 | 0,00095 | WDFY2    | WD repeat and FYVE domain containing 2                                 |
| 1,411275843 | 0,0197  | 1,358486285 | 0,00092 | WDFY4    | WDFY family member 4                                                   |
| 0,627635996 | 0,02939 | 0,69399636  | 0,00099 | WDR26    | WD repeat domain 26                                                    |
| 0,560194607 | 0,007   | 0,70270935  | 0,03385 | WDR26    | WD repeat domain 26                                                    |
| 0,611744021 | 0,02477 | 0,687770909 | 0,00001 | WDR41    | WD repeat domain 41                                                    |
| 0,598324482 | 0,00146 | 0,774319028 | 0,00146 | WDR41    | WD repeat domain 41                                                    |
| 0,743291492 | 0,00452 | 0,778624691 | 0,00017 | WDR53    | WD repeat domain 53                                                    |
| 0,645728675 | 0,03519 | 0,722966147 | 0,00007 | WDR61    | WD repeat domain 61                                                    |
| 0,704172113 | 0,00508 | 0,756808396 | 0,00007 | WDR61    | WD repeat domain 61                                                    |
| 0,623300597 | 0,01051 | 0,69640574  | 0       | WDR75    | WD repeat domain 75                                                    |
| 1,349102534 | 0,01899 | 1,237132479 | 0,00253 | WDR93    | WD repeat domain 93                                                    |
| 0,622868708 | 0,0069  | 0,713012859 | 0,01526 | WEE1     | WEE1 homolog (S. pombe)                                                |
| 0,329648404 | 0,00044 | 0,589269704 | 0,00504 | WFDC5    | WAP four-disulfide core domain 5                                       |
| 1,71832151  | 0,00796 | 1,591072968 | 0,0001  | WFS1     | Wolfram syndrome 1 (wolframian)                                        |
| 1,710004356 | 0,0008  | 1,617762697 | 0,00003 | WFS1     | Wolfram syndrome 1 (wolframian)                                        |
| 1,903955817 | 0,01148 | 1,583371732 | 0,00303 | WIPF1    | WAS/WASL interacting protein family, member 1                          |
| 1,695839929 | 0,00016 | 1,771535038 | 0       | WIPF1    | WAS/WASL interacting protein family, member 1                          |
| 1,558329159 | 0,00097 | 1,264003098 | 0,00029 | WIPF1    | WAS/WASL interacting protein family, member 1                          |
| 0,543367431 | 0,00815 | 0,76101669  | 0,00951 | WNK1     | WNK lysine deficient protein kinase 1                                  |
| 0,501388218 | 0,01035 | 0,708578698 | 0,0003  | WNK1     | WNK lysine deficient protein kinase 1                                  |
| 0,418413121 | 0,00218 | 0,478967609 | 0       | WNK1     | WNK lysine deficient protein kinase 1                                  |
| 0,47963206  | 0,00243 | 0,708087719 | 0,00082 | WNK1     | WNK lysine deficient protein kinase 1                                  |
| 0,432868283 | 0,01249 | 0,61813763  | 0,00021 | WNK1     | WNK lysine deficient protein kinase 1                                  |
| 1,52414483  | 0,00612 | 1,292352831 | 0,0085  | WNT2     | wingless-type MMTV integration site family member 2                    |

|             |         |             |         |         |                                                                                                        |
|-------------|---------|-------------|---------|---------|--------------------------------------------------------------------------------------------------------|
| 0,789493887 | 0,02055 | 1,132098902 | 0,03695 | WNT4    | wingless-type MMTV integration site family, member 4                                                   |
| 1,2397077   | 0,04628 | 1,143930973 | 0,03119 | WT1-AS  | WT1 antisense RNA (non-protein coding)                                                                 |
| 0,710546022 | 0,02069 | 0,701249625 | 0,00987 | WTAP    | Wilms tumor 1 associated protein                                                                       |
| 0,658383461 | 0,00268 | 0,727490342 | 0,00099 | WWC1    | WW and C2 domain containing 1                                                                          |
| 0,737134609 | 0,02432 | 0,783497187 | 0,0107  | WWC1    | WW and C2 domain containing 1                                                                          |
| 0,666187413 | 0,00706 | 0,733566672 | 0,00132 | WWC1    | WW and C2 domain containing 1                                                                          |
| 0,680185426 | 0,00193 | 0,801069878 | 0,01209 | WWTR1   | WW domain containing transcription regulator 1                                                         |
| 1,347233577 | 0,04449 | 1,217566019 | 0,01188 | XAGE-4  | XAGE-4 protein                                                                                         |
| 2,542063379 | 0,00001 | 2,45206972  | 0,0001  | XBP1    | X-box binding protein 1                                                                                |
| 1,812523877 | 0,00005 | 1,399585866 | 0,00015 | XCL1    | chemokine (C motif) ligand 1                                                                           |
| 2,043440165 | 0,00585 | 1,968368044 | 0,00068 | XDH     | xanthine dehydrogenase                                                                                 |
| 0,490729532 | 0,00265 | 0,579146403 | 0,00005 | XG      | Xg blood group                                                                                         |
| 0,60667678  | 0,01149 | 0,645728675 | 0,00116 | XGPY2   | Xg pseudogene, Y-linked 2                                                                              |
| 0,573553512 | 0,00036 | 0,817902059 | 0,00846 | XKRX    | XK, Kell blood group complex subunit-related, X-linked                                                 |
| 0,643048742 | 0,01304 | 0,743291492 | 0,00006 | XPA     | xeroderma pigmentosum, complementation group A                                                         |
| 0,701249625 | 0,0071  | 0,8362464   | 0,00027 | XPO5    | exportin 5                                                                                             |
| 0,681129017 | 0,02628 | 0,755759964 | 0,00051 | XPOT    | exportin, tRNA (nuclear export receptor for tRNAs)                                                     |
| 0,681129017 | 0,04567 | 0,86154616  | 0,00415 | XRCC5   | X-ray repair complementing defective repair in Chinese hamster cells 5 (double-strand-break rejoining) |
| 0,733566672 | 0,03525 | 0,860352631 | 0,02545 | XRCC5   | X-ray repair complementing defective repair in Chinese hamster cells 5 (double-strand-break rejoining) |
| 0,582366793 | 0,03002 | 0,612168196 | 0,00013 | YES1    | v-yes-1 Yamaguchi sarcoma viral oncogene homolog 1                                                     |
| 0,68491649  | 0,01867 | 0,793333843 | 0,00495 | YME1L1  | YME1-like 1 (S. cerevisiae)                                                                            |
| 0,690637224 | 0,02817 | 0,711531731 | 0,00005 | YME1L1  | YME1-like 1 (S. cerevisiae)                                                                            |
| 0,383952567 | 0,00252 | 0,517991382 | 0,00026 | YOD1    | YOD1 OTU deubiquitinating enzyme 1 homolog (S. cerevisiae)                                             |
| 1,216722359 | 0,02539 | 1,151089491 | 0,02546 | YPEL1   | yippee-like 1 (Drosophila)                                                                             |
| 0,757858283 | 0,0403  | 0,792784137 | 0,00618 | YTHDC1  | YTH domain containing 1                                                                                |
| 0,737645729 | 0,02348 | 0,831045862 | 0,00032 | YWHA8   | tyrosine 3-monooxygenase/tryptophan 5-monooxygenase activation protein, beta polypeptide               |
| 0,690158677 | 0,00236 | 0,768437591 | 0,00326 | YWHAQ   | tyrosine 3-monooxygenase/tryptophan 5-monooxygenase activation protein, theta polypeptide              |
| 0,709561678 | 0,02544 | 0,736623843 | 0,00013 | YWHAQ   | tyrosine 3-monooxygenase/tryptophan 5-monooxygenase activation protein, theta polypeptide              |
| 0,679714121 | 0,01181 | 0,803293997 | 0,00124 | YWHAQ   | tyrosine 3-monooxygenase/tryptophan 5-monooxygenase activation protein, theta polypeptide              |
| 0,682073917 | 0,01998 | 0,860949188 | 0,00654 | YWHAZ   | tyrosine 3-monooxygenase/tryptophan 5-monooxygenase activation protein, zeta polypeptide               |
| 0,492092011 | 0,01693 | 0,812815602 | 0,03216 | YWHAZ   | tyrosine 3-monooxygenase/tryptophan 5-monooxygenase activation protein, zeta polypeptide               |
| 0,743291492 | 0,02072 | 0,855002178 | 0,00919 | YY1     | YY1 transcription factor                                                                               |
| 0,71400199  | 0,00656 | 0,770571108 | 0,00002 | YY1AP1  | YY1 associated protein 1                                                                               |
| 0,733566672 | 0,00453 | 0,85797053  | 0,02683 | ZADH2   | zinc binding alcohol dehydrogenase domain containing 2                                                 |
| 0,611744021 | 0,0249  | 0,671286251 | 0,0001  | ZADH2   | zinc binding alcohol dehydrogenase domain containing 2                                                 |
| 0,647072827 | 0,00429 | 0,855002178 | 0,03424 | ZADH2   | zinc binding alcohol dehydrogenase domain containing 2                                                 |
| 0,487339815 | 0,00185 | 0,648869383 | 0,00053 | ZADH2   | zinc binding alcohol dehydrogenase domain containing 2                                                 |
| 0,558643569 | 0,00808 | 0,76950361  | 0,01075 | ZADH2   | zinc binding alcohol dehydrogenase domain containing 2                                                 |
| 0,753145233 | 0,02595 | 0,744838732 | 0,00012 | ZAK     | sterile alpha motif and leucine zipper containing kinase AZK                                           |
| 0,623732786 | 0,04814 | 0,724973416 | 0,00734 | ZAK     | sterile alpha motif and leucine zipper containing kinase AZK                                           |
| 1,427014506 | 0,02647 | 1,557249382 | 0,00004 | ZAP70   | zeta-chain (TCR) associated protein kinase 70kDa                                                       |
| 1,311302014 | 0,00681 | 1,217566019 | 0,02252 | ZAP70   | zeta-chain (TCR) associated protein kinase 70kDa                                                       |
| 1,701727459 | 0,00174 | 1,480413298 | 0,00014 | ZBP1    | Z-DNA binding protein 1                                                                                |
| 3,140512475 | 0,00015 | 2,482854983 | 0,00005 | ZBP1    | Z-DNA binding protein 1                                                                                |
| 0,647970483 | 0,04055 | 0,668500248 | 0,0005  | ZBTB1   | zinc finger and BTB domain containing 1                                                                |
| 1,756860936 | 0,0141  | 1,330529041 | 0,03332 | ZBTB38  | zinc finger and BTB domain containing 38                                                               |
| 1,257884972 | 0,00753 | 1,218410264 | 0,00309 | ZBTB38  | zinc finger and BTB domain containing 38                                                               |
| 0,656105627 | 0,01479 | 0,641268301 | 0,00001 | ZBTB43  | zinc finger and BTB domain containing 43                                                               |
| 0,734075318 | 0,00576 | 0,743806881 | 0,00008 | ZBTB43  | zinc finger and BTB domain containing 43                                                               |
| 1,319507911 | 0,0339  | 1,315854525 | 0,00021 | ZBTB46  | zinc finger and BTB domain containing 46                                                               |
| 0,735093668 | 0,00544 | 0,791137301 | 0,0002  | ZBTB5   | zinc finger and BTB domain containing 5                                                                |
| 0,613442489 | 0,00025 | 0,628071191 | 0,00053 | ZBTB7A  | zinc finger and BTB domain containing 7A                                                               |
| 0,625898229 | 0,04164 | 0,726986259 | 0,01544 | ZBTB7A  | zinc finger and BTB domain containing 7A                                                               |
| 0,529242197 | 0,00049 | 0,752623374 | 0,00013 | ZC3H8   | zinc finger CCCH-type containing 8                                                                     |
| 0,686342216 | 0,0036  | 0,788946841 | 0,00053 | ZC3HAV1 | zinc finger CCCH-type, antiviral 1                                                                     |
| 0,784584098 | 0,00963 | 0,813943185 | 0,00393 | ZCCHC10 | zinc finger, CCHC domain containing 10                                                                 |
| 1,313121125 | 0,01968 | 1,371733289 | 0,00421 | ZCCHC24 | zinc finger, CCHC domain containing 24                                                                 |
| 0,576343173 | 0,01786 | 0,71548826  | 0,00002 | ZCCHC6  | zinc finger, CCHC domain containing 6                                                                  |
| 0,743806881 | 0,01715 | 0,756283999 | 0,00116 | ZCCHC6  | zinc finger, CCHC domain containing 6                                                                  |
| 0,693034943 | 0,00367 | 0,690158677 | 0,00103 | ZCCHC7  | zinc finger, CCHC domain containing 7                                                                  |
| 0,72597914  | 0,03411 | 0,764718139 | 0,00605 | ZCCHC9  | zinc finger, CCHC domain containing 9                                                                  |
| 0,586011142 | 0,00326 | 0,616853585 | 0,00048 | ZDHHC11 | zinc finger, DHHC-type containing 11                                                                   |
| 0,595428425 | 0,01308 | 0,583579051 | 0,00048 | ZDHHC13 | zinc finger, DHHC-type containing 13                                                                   |
| 0,552865327 | 0,0124  | 0,632878297 | 0,00029 | ZDHHC13 | zinc finger, DHHC-type containing 13                                                                   |
| 0,745872013 | 0,03763 | 0,722465199 | 0,00017 | ZDHHC13 | zinc finger, DHHC-type containing 13                                                                   |
| 1,601029621 | 0,00007 | 1,362258035 | 0,00028 | ZDHHC2  | zinc finger, DHHC-type containing 2                                                                    |
| 2,015307521 | 0,00828 | 1,243149669 | 0,04528 | ZDHHC2  | zinc finger, DHHC-type containing 2                                                                    |
| 1,368883813 | 0,04567 | 1,190856849 | 0,01671 | ZDHHC2  | zinc finger, DHHC-type containing 2                                                                    |
| 1,178539408 | 0,03321 | 1,099616149 | 0,03925 | ZDHHC21 | zinc finger, DHHC-type containing 21                                                                   |
| 0,605416542 | 0,03075 | 0,655651007 | 0,02973 | ZDHHC21 | zinc finger, DHHC-type containing 21                                                                   |
| 0,729510172 | 0,02099 | 0,815072332 | 0,00988 | ZDHHC23 | zinc finger, DHHC-type containing 23                                                                   |
| 1,459020344 | 0,00333 | 1,277213759 | 0,00191 | ZDHHC3  | zinc finger, DHHC-type containing 3                                                                    |
| 1,467133344 | 0,00535 | 1,282536603 | 0,00778 | ZDHHC3  | zinc finger, DHHC-type containing 3                                                                    |
| 0,792234811 | 0,01113 | 0,859160755 | 0,00778 | ZDHHC3  | zinc finger, DHHC-type containing 3                                                                    |
| 1,328685814 | 0,01311 | 0,866937564 | 0,00741 | ZDHHC5  | zinc finger, DHHC-type containing 5                                                                    |
| 1,172022284 | 0,0338  | 1,41519416  | 0,03909 | ZEB2    | zinc finger E-box binding homeobox 2                                                                   |
| 0,601234624 | 0,001   | 1,490710387 | 0,00013 | ZFAT    | zinc finger and AT hook domain containing                                                              |
| 0,760489377 | 0,01496 | 0,790041312 | 0,00153 | ZFYVE21 | zinc finger, FYVE domain containing 21                                                                 |
| 1,196648963 | 0,01354 | 1,131314463 | 0,01879 | ZFYVE27 | zinc finger, FYVE domain containing 27                                                                 |
| 0,784040454 | 0,04536 | 0,679243142 | 0,00137 | ZHX1    | zinc fingers and homeoboxes 1                                                                          |
| 0,710546022 | 0,00333 | 1,277213759 | 0,00142 | ZHX2    | zinc fingers and homeoboxes 2                                                                          |
| 0,6341957   | 0,00535 | 1,282536603 | 0,00773 | ZHX2    | zinc fingers and homeoboxes 2                                                                          |
| 0,69640574  | 0,02262 | 0,832775771 | 0,00452 | ZHX3    | zinc fingers and homeoboxes 3                                                                          |
| 1,178539408 | 0,00108 | 1,420107359 | 0       | ZKSCAN2 | zinc finger with KRAB and SCAN domains 2                                                               |
| 0,582366793 | 0,04033 | 1,101141598 | 0,03117 | ZKSCAN3 | zinc finger with KRAB and SCAN domains 3                                                               |
| 2,716972569 | 0,02976 | 0,689202576 | 0,00036 | ZMYM5   | zinc finger, MYM-type 5                                                                                |
| 1,652900636 | 0,01481 | 0,818469182 | 0,01767 | ZMYND19 | zinc finger, MYND-type containing 19                                                                   |
| 0,724471077 | 0,03572 | 1,244011653 | 0,00613 | ZMYND8  | zinc finger, MYND-type containing 8                                                                    |
| 0,786217292 | 0,01096 | 0,844986384 | 0,00383 | ZNF101  | zinc finger protein 101                                                                                |
| 0,454074209 | 0,00573 | 0,883315051 | 0,03739 | ZNF16   | zinc finger protein 16                                                                                 |
|             | 0,01663 | 0,573951207 | 0,00001 | ZNF165  | zinc finger protein 165                                                                                |
|             | 0,03035 | 0,737645729 | 0,00034 | ZNF185  | zinc finger protein 185 (LIM domain)                                                                   |
|             | 0,04528 | 1,209994089 | 0,0049  | ZNF19   | zinc finger protein 19                                                                                 |
|             | 0,04868 | 0,796640096 | 0,00408 | ZNF207  | zinc finger protein 207                                                                                |
|             | 0,00006 | 1,943961976 | 0,00001 | ZNF215  | zinc finger protein 215                                                                                |
|             | 0,00073 | 1,365093718 | 0,00022 | ZNF236  | zinc finger protein 236                                                                                |
|             | 0,04122 | 0,859160755 | 0,00662 | ZNF250  | zinc finger protein 250                                                                                |
|             | 0,01642 | 0,823591017 | 0,0069  | ZNF254  | zinc finger protein 254                                                                                |
|             | 0,00737 | 0,564482202 | 0,00033 | ZNF273  | zinc finger protein 273                                                                                |

|             |         |             |         |            |                                                      |
|-------------|---------|-------------|---------|------------|------------------------------------------------------|
| 1,929196369 | 0,00477 | 1,797510253 | 0,00003 | ZNF275     | zinc finger protein 275                              |
| 2,709449955 | 0,00008 | 1,6724928   | 0,00004 | ZNF275     | zinc finger protein 275                              |
| 0,677362489 | 0,00834 | 0,629378587 | 0,00005 | ZNF330     | zinc finger protein 330                              |
| 1,184271612 | 0,02832 | 1,227735684 | 0,00684 | ZNF333     | zinc finger protein 333                              |
| 1,241427492 | 0,01518 | 1,163926534 | 0,00282 | ZNF385D    | zinc finger protein 385D                             |
| 0,722966147 | 0,00138 | 0,882702996 | 0,01065 | ZNF398     | zinc finger protein 398                              |
| 0,683020128 | 0,03888 | 0,790589117 | 0,01311 | ZNF462     | zinc finger protein 462                              |
| 0,840896415 | 0,042   | 0,843815796 | 0,00307 | ZNF485     | zinc finger protein 485                              |
| 1,157490217 | 0,04043 | 1,16634937  | 0,01861 | ZNF503-AS1 | ZNF503 antisense RNA 1 (non-protein coding)          |
| 1,232852325 | 0,04362 | 1,147107024 | 0,00724 | ZNF507     | zinc finger protein 507                              |
| 1,20664392  | 0,04145 | 1,163120042 | 0,0238  | ZNF518B    | zinc finger protein 518B                             |
| 0,724973416 | 0,03523 | 0,811127156 | 0,01729 | ZNF561     | zinc finger protein 561                              |
| 0,624598063 | 0,00623 | 0,699792933 | 0,00001 | ZNF562     | zinc finger protein 562                              |
| 0,790041312 | 0,03187 | 0,792234811 | 0,00152 | ZNF565     | zinc finger protein 565                              |
| 0,512989073 | 0,0162  | 0,55632506  | 0       | ZNF57      | zinc finger protein 57                               |
| 0,717474767 | 0,01979 | 0,812815602 | 0,00582 | ZNF585A    | zinc finger protein 585A                             |
| 0,836826243 | 0,02179 | 0,817335328 | 0,01069 | ZNF596     | zinc finger protein 596                              |
| 1,393777239 | 0,01058 | 1,397646972 | 0,00007 | ZNF609     | zinc finger protein 609                              |
| 1,374588696 | 0,00543 | 1,157490217 | 0,02773 | ZNF618     | zinc finger protein 618                              |
| 0,73153561  | 0,04048 | 0,909408252 | 0,03391 | ZNF638     | zinc finger protein 638                              |
| 1,634670657 | 0,01604 | 1,303147149 | 0,00486 | ZNF652     | zinc finger protein 652                              |
| 0,594191553 | 0,00329 | 0,812815602 | 0,02222 | ZNF662     | zinc finger protein 662                              |
| 0,681129017 | 0,01866 | 0,803850991 | 0,00059 | ZNF669     | zinc finger protein 669                              |
| 0,69640574  | 0,02334 | 0,692554734 | 0,00016 | ZNF675     | zinc finger protein 675                              |
| 1,596596773 | 0,03545 | 1,183451022 | 0,01505 | ZNF689     | zinc finger protein 689                              |
| 0,76154437  | 0,01299 | 0,841479482 | 0,00655 | ZNF7       | zinc finger protein 7                                |
| 1,225185332 | 0,03481 | 1,192508872 | 0,00088 | ZNF702P    | zinc finger protein 702, pseudogene                  |
| 0,653382627 | 0,02432 | 0,774319028 | 0,01768 | ZNF704     | zinc finger protein 704                              |
| 0,807201075 | 0,02484 | 0,842062954 | 0,01383 | ZNF706     | zinc finger protein 706                              |
| 1,501079098 | 0,001   | 1,267512522 | 0,00988 | ZNF709     | zinc finger protein 709                              |
| 0,729510172 | 0,0294  | 0,855002178 | 0,03595 | ZNF711     | zinc finger protein 711                              |
| 1,398616083 | 0,00416 | 1,341642225 | 0,00964 | ZNF747     | zinc finger protein 747                              |
| 0,499307333 | 0,00709 | 0,547146851 | 0,00001 | ZNF750     | zinc finger protein 750                              |
| 1,325007017 | 0,00283 | 1,21167266  | 0,0312  | ZNF764     | zinc finger protein 764                              |
| 0,551334582 | 0,00822 | 0,708578698 | 0,00001 | ZNF770     | zinc finger protein 770                              |
| 0,675955417 | 0,04187 | 0,738157203 | 0,00519 | ZNF785     | zinc finger protein 785                              |
| 0,71449707  | 0,02963 | 0,79774524  | 0,00473 | ZNF789     | zinc finger protein 789                              |
| 0,73153561  | 0,02222 | 0,672683604 | 0,00053 | ZNF800     | zinc finger protein 800                              |
| 0,543367431 | 0,02298 | 0,550570799 | 0,00011 | ZNF823     | zinc finger protein 823                              |
| 1,375541818 | 0,03936 | 1,216722359 | 0,02858 | ZNF827     | zinc finger protein 827                              |
| 0,62546454  | 0,01188 | 0,780786493 | 0,00085 | ZNF830     | zinc finger protein 830                              |
| 0,700763725 | 0,01007 | 0,709561678 | 0,0005  | ZNF846     | zinc finger protein 846                              |
| 0,69399636  | 0,03769 | 0,763129604 | 0,00143 | ZNFX1-AS1  | ZNFX1 antisense RNA 1 (non-protein coding)           |
| 0,784584098 | 0,02372 | 0,767905135 | 0,00069 | ZNRF1      | zinc and ring finger 1                               |
| 0,580351957 | 0,02889 | 0,618566239 | 0,00014 | ZNRF3      | zinc and ring finger 3                               |
| 0,651122095 | 0,01349 | 0,762072415 | 0,00107 | ZSCAN29    | zinc finger and SCAN domain containing 29            |
| 1,29145735  | 0,04235 | 1,336074078 | 0,00013 | ZSCAN30    | zinc finger and SCAN domain containing 30            |
| 0,627635996 | 0,0292  | 0,749499801 | 0       | ZWILCH     | Zwilch, kinetochore associated, homolog (Drosophila) |
| 0,657015814 | 0,0453  | 0,657927263 | 0,00004 | ZXDC       | ZXD family zinc finger C                             |



Panel 2: Genes significantly regulated in aggressive (AP), but not chronic (CP) periodontitis (p<0.05).

| FC AP        | p AP    | FC CP        | p CP    | Symbol   | Name                                                                                                                                             |
|--------------|---------|--------------|---------|----------|--------------------------------------------------------------------------------------------------------------------------------------------------|
| 0.828170661  | 0.0409  | 0.9686818189 | 0.5388  | AARS1    | alanyl-tRNA synthetase domain containing 1                                                                                                       |
| 1.30589787   | 0.04685 | 1.189207115  | 0.05818 | ABCB1    | ATP-binding cassette, sub-family B (MDR/TAP), member 1                                                                                           |
| 0.75838773   | 0.04202 | 1.049716684  | 0.51888 | ABCB1    | ATP-binding cassette, sub-family B (MDR/TAP), member 1                                                                                           |
| 0.791685865  | 0.04634 | 0.930495858  | 0.2489  | ABCF1    | ATP-binding cassette, sub-family F (GCN20), member 1                                                                                             |
| 1.583371732  | 0.02042 | 1.051127209  | 0.47068 | ABHD2    | abhydrolase domain containing 2                                                                                                                  |
| 0.680657058  | 0.04115 | 0.952298545  | 0.68162 | ABR      | active BCR-related gene                                                                                                                          |
| 0.632439771  | 0.01817 | 0.908184818  | 0.41178 | ACAP3    | ArfGAP with coiled-coil, ankyrin repeat and PH domains 3                                                                                         |
| 0.75838773   | 0.0467  | 0.92274293   | 0.23383 | ACOT13   | acyl-CoA thioesterase 13                                                                                                                         |
| 0.688247801  | 0.01233 | 1.02383869   | 0.4648  | ACOX1    | acyl-CoA oxidase 1, palmitoyl                                                                                                                    |
| 0.711038705  | 0.03118 | 0.93109482   | 0.13051 | ACP1     | acid phosphatase 1, soluble                                                                                                                      |
| 1.205807828  | 0.04722 | 1.004167543  | 0.91507 | ACSF3    | acyl-CoA synthetase family member 3                                                                                                              |
| 0.786217292  | 0.0379  | 0.863339559  | 0.11885 | ACVR18   | activin A receptor, type IB                                                                                                                      |
| 1.179356592  | 0.02454 | 1.074004472  | 0.21528 | ACY3     | aspartoacylase (aminocyclase) 3                                                                                                                  |
| 1.42899414   | 0.00123 | 1.282536603  | 0.05813 | ADAM12   | ADAM metalloproteinase domain 12                                                                                                                 |
| 1.368883813  | 0.009   | 1.037419337  | 0.57907 | ADAMTS10 | ADAM metalloproteinase with thrombospondin type 1 motif, 10                                                                                      |
| 1.568089008  | 0.04951 | 1.113421618  | 0.39531 | ADAMTS5  | ADAM metalloproteinase with thrombospondin type 1 motif, 5                                                                                       |
| 1.242288282  | 0.02031 | 1.050444544  | 0.53549 | ADAMTSL1 | ADAMTS-like 1                                                                                                                                    |
| 0.811689581  | 0.04445 | 0.950659101  | 0.30813 | ADAMTSL3 | ADAMTS-like 3                                                                                                                                    |
| 0.701249625  | 0.00326 | 0.950000383  | 0.49181 | ADAT1    | adenosine deaminase, tRNA-specific 1                                                                                                             |
| 1.365993718  | 0.0271  | 1.088080544  | 0.10689 | ADC1T    | adenylate cyclase 1 (brain)                                                                                                                      |
| 0.701249625  | 0.04643 | 0.938221197  | 0.51426 | AFF4     | AF4/FMR2 family, member 4                                                                                                                        |
| 1.172022284  | 0.04994 | 1.055553718  | 0.30032 | AFMID    | arylfornamide                                                                                                                                    |
| 0.84400887   | 0.04191 | 0.937571096  | 0.26608 | AGAP3    | ArfGAP with GTPase domain, ankyrin repeat and PH domain 3                                                                                        |
| 0.693034943  | 0.00047 | 0.90062598   | 0.40508 | AGPS     | alkylglycerone phosphate synthase                                                                                                                |
| 1.251796459  | 0.01097 | 1.065858781  | 0.12189 | AGT1     | angiotensin II receptor, type 1                                                                                                                  |
| 1.319507911  | 0.01607 | 1.040300267  | 0.3245  | AGTR2    | angiotensin II receptor, type 2                                                                                                                  |
| 0.632878297  | 0.0082  | 0.934975198  | 0.28669 | AHNAK    | AHNAK nucleoprotein                                                                                                                              |
| 1.32408891   | 0.00679 | 1.072516617  | 0.13321 | AIP1     | aryl hydrocarbon receptor interacting protein-like 1                                                                                             |
| 1.241247492  | 0.04355 | 1.036701101  | 0.36508 | AJAP1    | adherens junctions associated protein 1                                                                                                          |
| 1.218410264  | 0.03793 | 0.99470169   | 0.88372 | AK7      | adenylate kinase 7                                                                                                                               |
| 1.279872414  | 0.01233 | 1.03532127   | 0.1212  | AKAP12   | A kinase (PKA) anchor protein 12                                                                                                                 |
| 0.823591017  | 0.04555 | 1.011853201  | 0.81623 | AKAP8L   | A kinase (PKA) anchor protein 8-like                                                                                                             |
| 0.568014632  | 0.00057 | 0.822450069  | 0.09729 | AKR1C1   | aldo-keto reductase family 1, member C1 (dihydrodiol dehydrogenase 1; 20-alpha (3-alpha)-hydroxysteroid dehydrogenase)                           |
| 0.50945598   | 0.0092  | 0.813943185  | 0.0943  | AKR1C1   | aldo-keto reductase family 1, member C1 (dihydrodiol dehydrogenase 1; 20-alpha (3-alpha)-hydroxysteroid dehydrogenase)                           |
| 0.587636164  | 0.00137 | 0.857376037  | 0.19927 | AKR1C2   | aldo-keto reductase family 1, member C2 (dihydrodiol dehydrogenase 2; bile acid binding protein; 3-alpha hydroxysteroid dehydrogenase, type III) |
| 0.463515273  | 0.04929 | 0.932619546  | 0.43689 | AKR1C2   | aldo-keto reductase family 1, member C2 (dihydrodiol dehydrogenase 2; bile acid binding protein; 3-alpha hydroxysteroid dehydrogenase, type III) |
| 2.133171562  | 0.00149 | 1.22603486   | 0.12541 | ALDH1A3  | aldehyde dehydrogenase 1 family, member A3                                                                                                       |
| 0.670356296  | 0.0213  | 0.925946023  | 0.18591 | ALDH7A1  | aldehyde dehydrogenase 7 family, member A1                                                                                                       |
| 0.71896266   | 0.01615 | 0.938221197  | 0.37175 | ALDOC    | aldolase C, fructose-bisphosphate                                                                                                                |
| 0.669891801  | 0.02465 | 0.745355193  | 0.0558  | ALG13    | asparagine-linked glycosylation 13 homolog (S. cerevisiae)                                                                                       |
| 1.258757174  | 0.02075 | 1.048899328  | 0.48474 | ALG14    | asparagine-linked glycosylation 14 homolog (S. cerevisiae)                                                                                       |
| 0.576340092  | 0.00127 | 0.851002178  | 0.14183 | ALX2     | archidutate lipoglycanase 3                                                                                                                      |
| 0.552482242  | 0.03194 | 0.852044095  | 0.07398 | ALS2L    | ALS2 C-terminal like                                                                                                                             |
| 0.815637493  | 0.03051 | 0.884540435  | 0.05479 | AMACR    | alpha-methylacyl-CoA racemase                                                                                                                    |
| 0.767905135  | 0.02927 | 0.972654947  | 0.64056 | AMN      | amniotomous homolog (mouse)                                                                                                                      |
| 1.283425898  | 0.0256  | 1.139183377  | 0.07047 | AMPH     | amphiphysin                                                                                                                                      |
| 0.787307977  | 0.0371  | 0.913913631  | 0.25344 | ANAPC7   | anaphase promoting complex subunit 7                                                                                                             |
| 1.331451613  | 0.02985 | 1.169876654  | 0.075   | ANGPT2   | angiotensinogen 2                                                                                                                                |
| 0.820172911  | 0.04113 | 1.003471749  | 0.96202 | ANGPT11  | angiotensinogen-like 1                                                                                                                           |
| 1.22603486   | 0.0454  | 1.154285418  | 0.07625 | ANK1     | ankyrin 1, erythrocytic                                                                                                                          |
| 1.36983298   | 0.03027 | 1.082975046  | 0.36129 | ANKK1D1A | ankyrin repeat and death domain containing 1A                                                                                                    |
| 0.731028724  | 0.04399 | 0.91573886   | 0.4091  | ANKFY1   | ankyrin repeat and FVVE domain containing 1                                                                                                      |
| 0.682073917  | 0.04048 | 1.027422493  | 0.5644  | ANKYL1   | ankyrin repeat and FVVE domain containing 1                                                                                                      |
| 0.717972255  | 0.02196 | 0.840864615  | 0.12821 | ANKRD17  | ankyrin repeat domain 17                                                                                                                         |
| 0.829894586  | 0.02927 | 0.962594443  | 0.39642 | ANKRD24  | ankyrin repeat domain 24                                                                                                                         |
| 1.815038311  | 0.02816 | 1.165541198  | 0.20835 | ANKRD28  | ankyrin repeat domain 28                                                                                                                         |
| 0.817902059  | 0.02021 | 0.874784765  | 0.06334 | ANKRD38  | ankyrin repeat domain 38                                                                                                                         |
| 1.20664392   | 0.01852 | 0.897840227  | 0.43689 | ANKRD40  | ankyrin repeat domain 40                                                                                                                         |
| 1.285206337  | 0.01856 | 1.094293701  | 0.08305 | ANKRD43  | ankyrin repeat domain 43                                                                                                                         |
| 0.701735863  | 0.00451 | 0.849096246  | 0.05624 | ANP32B   | acidic (leucine-rich) nuclear phosphoprotein 32 family, member B                                                                                 |
| 0.837406488  | 0.02589 | 0.914465089  | 0.09731 | ANPEP    | alanine (membrane) aminopeptidase                                                                                                                |
| 1.74956953   | 0.03143 | 0.965936329  | 0.90169 | ANXA1    | annexin A1                                                                                                                                       |
| 0.61856239   | 0.00498 | 0.957952318  | 0.77708 | ANXA9    | annexin A9                                                                                                                                       |
| 0.56591689   | 0.00135 | 0.73245337   | 0.1482  | ANXA9    | annexin A9                                                                                                                                       |
| 1.265756594  | 0.01208 | 1.059592783  | 0.53995 | AP2A1    | adaptor-related protein complex 2, alpha 1 subunit                                                                                               |
| 1.337000495  | 0.0113  | 1.149494848  | 0.0598  | APBA2    | amyloid beta (A4) precursor protein-binding, family A, member 2                                                                                  |
| 1.27809363   | 0.01827 | 1.101141598  | 0.14794 | APLN     | apelin                                                                                                                                           |
| 1.367935304  | 0.00892 | 1.157490217  | 0.13028 | APLP1    | amyloid beta (A4) precursor-like protein 1                                                                                                       |
| 1.485552921  | 0.00598 | 1.094789353  | 0.31068 | APOL5    | apolipoprotein L 5                                                                                                                               |
| 0.631563631  | 0.02319 | 0.864537231  | 0.11109 | APRT     | adenine phosphoribosyltransferase                                                                                                                |
| 0.818469182  | 0.02822 | 0.93109482   | 0.16703 | APTX     | apratxin                                                                                                                                         |
| 0.76630998   | 0.04159 | 0.946057647  | 0.38336 | APTX     | apratxin                                                                                                                                         |
| 1.578997773  | 0.04235 | 1.10343374   | 0.63355 | AREG     | amphiregulin                                                                                                                                     |
| 0.69515485   | 0.03329 | 0.962026099  | 0.82769 | ARFGAP2  | ADP-ribosylation factor GTPase activating protein 2                                                                                              |
| 1.475291451  | 0.00048 | 1.120222284  | 0.1424  | ARFGAP3  | ADP-ribosylation factor GTPase activating protein 3                                                                                              |
| 0.63860688   | 0.00613 | 0.822450069  | 0.16082 | ARFGEF1  | ADP-ribosylation factor guanine nucleotide-exchange factor 1 (brefeldin A-inhibited)                                                             |
| 0.709561678  | 0.02148 | 0.895025071  | 0.34645 | ARGLU1   | arginine and glutamate rich 1                                                                                                                    |
| 1.336074078  | 0.03799 | 1.07479173   | 0.23693 | ARHGAP27 | Rho GTPase activating protein 27                                                                                                                 |
| 1.150585785  | 0.04097 | 1.048262476  | 0.33823 | ARHGAP31 | Rho GTPase activating protein 31                                                                                                                 |
| 0.1562139462 | 0.01321 | 0.95005563   | 0.12085 | ARHGAP32 | Rho GTPase activating protein 32                                                                                                                 |
| 1.350428242  | 0.00238 | 1.121166078  | 0.08959 | ARHGAP44 | Rho GTPase activating protein 44                                                                                                                 |
| 0.77271055   | 0.04999 | 0.950000383  | 0.23514 | ARHGEF10 | Rho guanine nucleotide exchange factor (GEF) 10                                                                                                  |
| 1.492778383  | 0.01161 | 1.117287138  | 0.1417  | ARHGFE2  | Rho/Rac guanine nucleotide exchange factor (GEF) 2                                                                                               |
| 1.310393404  | 0.04596 | 1.122721422  | 0.10387 | ARHGFE2  | Rho/Rac guanine nucleotide exchange factor (GEF) 2                                                                                               |
| 0.767374048  | 0.03632 | 0.97874165   | 0.75101 | ARL16    | ADP-ribosylation factor-like 16                                                                                                                  |
| 0.807201075  | 0.04299 | 0.862743245  | 0.0958  | ARN1L2   | aryl hydrocarbon receptor nuclear translocator-like 2                                                                                            |
| 1.32138406   | 0.02648 | 1.133669413  | 0.09533 | ARRB1    | arrestin, beta 1                                                                                                                                 |
| 1.411275843  | 0.00026 | 1.130530567  | 0.05672 | ARSB     | arylsulfatase B                                                                                                                                  |
| 1.185092771  | 0.03847 | 1.031683179  | 0.57979 | ART4     | ADP-ribosyltransferase 4 (Dombrock blood group)                                                                                                  |
| 0.645728675  | 0.00369 | 0.911301281  | 0.29047 | ASAP3    | ArfGAP with SH3 domain, ankyrin repeat and PH domain 3                                                                                           |
| 1.236273261  | 0.03078 | 1.050628741  | 0.3624  | ASB2     | ankyrin repeat and SOCS box containing 2                                                                                                         |
| 1.354724977  | 0.04264 | 1.090507733  | 0.08808 | ASB3     | ankyrin repeat and SOCS box containing 3                                                                                                         |
| 1.212512819  | 0.04903 | 1.025978145  | 0.65474 | ASPH     | aspartate beta-hydroxylase                                                                                                                       |
| 1.477338064  | 0.04937 | 1.167158102  | 0.12439 | ASPHD2   | aspartate beta-hydroxylase domain containing 2                                                                                                   |
| 0.70873733   | 0.00102 | 0.83275771   | 0.50387 | ASPRV1   | aspartic peptidase, retroviral-like 1                                                                                                            |
| 1.221793102  | 0.04137 | 1.041021598  | 0.33594 | ASTN2    | astroctatin 2                                                                                                                                    |
| 0.695440985  | 0.02794 | 0.890692911  | 0.1809  | ATG10    | ATG10 autophagy related 10 homolog (S. cerevisiae)                                                                                               |
| 1.248330549  | 0.0339  | 1.118061851  | 0.09011 | ATG10    | ATG10 autophagy related 10 homolog (S. cerevisiae)                                                                                               |
| 0.721464343  | 0.01032 | 0.965267025  | 0.78405 | ATG9B    | ATG9 autophagy related 9 homolog B (S. cerevisiae)                                                                                               |
| 1.340712592  | 0.01846 | 1.245737416  | 0.06819 | ATM      | ataxia telangiectasia mutated                                                                                                                    |
| 1.258757174  | 0.03652 | 0.995849753  | 0.93272 | ATP11A   | ATPase, class VI, type 11A                                                                                                                       |
| 0.577832163  | 0.00785 | 0.788400174  | 0.12119 | ATP13A4  | ATPase, type 13A4                                                                                                                                |
| 1.377450046  | 0.01016 | 1.145517898  | 0.11402 | ATP2A3   | ATPase, Ca++ transporting, ubiquitous                                                                                                            |
| 0.667111585  | 0.00544 | 0.928516852  | 0.22645 | ATP2B4   | ATPase, Ca++ transporting, plasma membrane 4                                                                                                     |
| 0.762072415  | 0.02525 | 0.925304428  | 0.19773 | ATP5E    | ATP synthase, H+ transporting, mitochondrial F1 complex, epsilon subunit                                                                         |
| 0.82743549   | 0.01876 | 0.92730546   | 0.17267 | ATP5G3   | ATP synthase, H+ transporting, mitochondrial Fo complex, subunit 3 (subunit 9)                                                                   |
| 0.760488377  | 0.00715 | 0.805633983  | 0.07336 | ATP5F6   | ATP synthase, H+ transporting, mitochondrial Fo complex, subunit F6                                                                              |
| 1.728499537  | 0.03458 | 1.001387256  | 0.98657 | ATP6V0A1 | ATPase, H+ transporting, lysosomal VO subunit a1                                                                                                 |
| 1.09499801   | 0.02886 | 0.961927455  | 0.39688 | ATP6V1F  | ATPase, H+ transporting, lysosomal 14kDa, V1 subunit F                                                                                           |
| 1.299539062  | 0.02374 | 1.137605228  | 0.05866 | ATP7B    | ATPase, Cu++ transporting, beta polypeptide                                                                                                      |
| 1.43097652   | 0.01212 | 1.063632673  | 0.30135 | ATP8B4   | ATPase, class I, type 8B, member 4                                                                                                               |
| 1.249196126  | 0.02024 | 1.07997656   | 0.23306 | ATXN7L1  | ataxin 7-like 1                                                                                                                                  |
| 0.828313546  | 0.03385 | 0.80888816   | 0.09611 | AURKB    | aurora kinase B                                                                                                                                  |
| 1.238848698  | 0.01603 | 1.054822317  | 0.47899 | AXL      | AXL receptor tyrosine kinase                                                                                                                     |
| 0.402762146  | 0.00262 | 0.995159722  | 0.97548 | ZGP1     | alpha-2-glycoprotein 1, zinc-binding                                                                                                             |
| 0.686342216  | 0.0403  | 0.806082831  | 0.15097 | B3GALNT2 | beta-1,3-N-acetylgalactosaminyltransferase 2                                                                                                     |
| 1.361314116  | 0.02086 | 0.99470169   | 0.92532 | B3GALT6  | UDP-Gal:betaGal beta 1,3-galactosyltransferase polypeptide 6                                                                                     |
| 0.642603169  | 0.03237 | 0.791335945  | 0.10891 | BAI1NT5  | UDP-GlcNAc:betaGal beta 1,3-N-acetylgalactosaminyltransferase 5                                                                                  |
| 0.639492791  | 0.00777 | 0.835666959  | 0.07872 | BAIAP2   | BAI1-associated protein 2                                                                                                                        |
| 0.794985251  | 0.01559 | 0.925304428  | 0.09479 | BAIAP2L1 | BAI1-associated protein 2-like 1                                                                                                                 |
| 2.184041091  | 0.00001 | 1.342572503  | 0.0698  | BANK1    | B-cell scaffold protein with ankyrin repeats 1                                                                                                   |
| 1.492778383  | 0.00063 | 1.237132479  | 0.09916 | BANK1    | B-cell scaffold protein with ankyrin repeats 1                                                                                                   |
| 1.29940965   | 0.02619 | 1.090507733  | 0.15768 | BATF2    | basic leucine zipper transcription factor, ATF-like 2                                                                                            |
| 1.372684431  | 0.00775 | 1.137605228  | 0.10423 | BCAN     | brevican                                                                                                                                         |
| 1.444930398  | 0.00676 | 1.092777739  | 0.23805 | BCAR3    | breast cancer anti-estrogen resistance 3                                                                                                         |
| 2.161450804  | 0.00038 | 1.385109468  | 0.05163 | BCL2L1   | BCL2-related protein A1                                                                                                                          |
| 1.638073396  | 0.00395 | 1.175276328  | 0.06799 | BCL2L11  | BCL2-like 11 (apoptosis facilitator)                                                                                                             |
| 0.78840174   | 0.03264 | 0.967947027  | 0.7153  | BCL2L13  | BCL2-like 13 (apoptosis facilitator)                                                                                                             |
| 1.266531254  | 0.005   | 1.1361361973 | 0.10875 | BCL7A    | B-cell CLL lymphoma 7A                                                                                                                           |
| 0.820741609  | 0.04405 | 0.980099415  | 0.72705 | BCSL1    | BCSL1-like (S. cerevisiae)                                                                                                                       |
| 2.75         |         |              |         |          |                                                                                                                                                  |

|             |         |             |                    |                                                                       |
|-------------|---------|-------------|--------------------|-----------------------------------------------------------------------|
| 0.747942879 | 0.0067  | 0.918276162 | 0.12256 BRK1       | BRICK1, SCAR/WAVE actin-nucleating complex subunit                    |
| 1.459020344 | 0.00084 | 1.263127262 | 0.08609 BRSK1      | BR serine/threonine kinase 1                                          |
| 0.747424624 | 0.00928 | 0.912565489 | 0.22486 BRWD3      | bromodomain and WD repeat domain containing 3                         |
| 1.270150983 | 0.20256 | 1.101141598 | 0.09901 BST1       | bone marrow stromal cell antigen 1                                    |
| 1.215036792 | 0.03878 | 1.069547088 | 0.22091 BTN3L      | butyrophilin-like 3                                                   |
| 0.790041312 | 0.02263 | 0.930496586 | 0.2372 BUB3        | budding uninhibited by benzimidazoles 3 homolog (yeast)               |
| 0.660891801 | 0.01195 | 0.803293997 | 0.11847 BZW1       | basic leucine zipper and W2 domains 1                                 |
| 0.783497187 | 0.03312 | 0.918912883 | 0.08357 C10orf12   | chromosome 10 open reading frame 12                                   |
| 1.169587664 | 0.04646 | 1.07733145  | 0.14504 C10orf122  | chromosome 10 open reading frame 122                                  |
| 0.811689581 | 0.03474 | 0.922742493 | 0.18953 C10orf26   | chromosome 10 open reading frame 26                                   |
| 1.362258035 | 0.01266 | 1.102460163 | 0.17242 C10orf54   | chromosome 10 open reading frame 54                                   |
| 1.237132479 | 0.03265 | 0.980799004 | 0.65886 C10orf81   | chromosome 10 open reading frame 81                                   |
| 0.817902059 | 0.02677 | 0.933679945 | 0.1932 C10orf49    | chromosome 11 open reading frame 49                                   |
| 0.76101669  | 0.01598 | 0.868742185 | 0.11606 C10orf52   | chromosome 11 open reading frame 52                                   |
| 0.81056512  | 0.02669 | 0.855002178 | 0.05804 C10orf63   | chromosome 11 open reading frame 63                                   |
| 1.580862624 | 0.00876 | 1.202469249 | 0.07648 C10orf93   | chromosome 11 open reading frame 93                                   |
| 1.271031689 | 0.03541 | 1.079238237 | 0.19276 C10orf93   | chromosome 11 open reading frame 93                                   |
| 1.199139914 | 0.03649 | 1.000693387 | 0.98822 C13orf15   | chromosome 13 open reading frame 15                                   |
| 0.738157203 | 0.04745 | 0.959264119 | 0.30535 C14orf101  | chromosome 14 open reading frame 101                                  |
| 0.759962428 | 0.00912 | 0.882091365 | 0.05266 C14orf119  | chromosome 14 open reading frame 119                                  |
| 1.215036792 | 0.03006 | 1.050444544 | 0.33398 C14orf166B | chromosome 14 open reading frame 166B                                 |
| 0.816789991 | 0.01049 | 0.940261008 | 0.13689 C14orf72   | chromosome 14 open reading frame 72                                   |
| 0.806082831 | 0.02909 | 0.894404902 | 0.07047 C14orf37   | chromosome 14 open reading frame 37                                   |
| 0.734075318 | 0.02131 | 0.918276162 | 0.29126 C15orf17   | chromosome 15 open reading frame 17                                   |
| 0.76418826  | 0.04893 | 0.942131274 | 0.59126 C15orf17   | chromosome 15 open reading frame 17                                   |
| 1.243494669 | 0.04927 | 1.099616149 | 0.19717 C15orf42   | chromosome 15 open reading frame 42                                   |
| 1.192588972 | 0.04667 | 1.027401439 | 0.65215 C16orf53   | chromosome 16 open reading frame 53                                   |
| 1.216722359 | 0.01601 | 1.062159186 | 0.09419 C16orf86   | chromosome 16 open reading frame 86                                   |
| 1.29145735  | 0.04076 | 0.879039561 | 0.08426 C16orf87   | chromosome 16 open reading frame 87                                   |
| 1.325007017 | 0.01148 | 1.158292806 | 0.11153 C17orf101  | chromosome 17 open reading frame 101                                  |
| 0.69495911  | 0.02367 | 0.916388645 | 0.36457 C17orf104  | chromosome 17 open reading frame 104                                  |
| 1.274560627 | 0.03719 | 1.129747215 | 0.0986 C17orf67    | chromosome 17 open reading frame 67                                   |
| 0.747424624 | 0.05541 | 0.97030824  | 0.10502 C17orf85   | chromosome 17 open reading frame 85                                   |
| 1.215879283 | 0.04304 | 1.10343374  | 0.26331 C19orf29   | chromosome 19 open reading frame 29                                   |
| 1.223488041 | 0.01226 | 0.967947027 | 0.56879 C19orf52   | chromosome 19 open reading frame 52                                   |
| 0.604577838 | 0.04588 | 1.00486382  | 0.9358 C19orf56    | chromosome 19 open reading frame 56                                   |
| 1.197487905 | 0.03732 | 1.125838586 | 0.10139 C19orf59   | chromosome 19 open reading frame 59                                   |
| 0.633311227 | 0.01930 | 0.903261551 | 0.14791 C19orf79   | chromosome 19 open reading frame 79                                   |
| 1.388955136 | 0.03613 | 1.115739322 | 0.157 C1GALT1C1    | C1GALT1-specific chaperone 1                                          |
| 0.657927263 | 0.01782 | 0.836826243 | 0.13662 C1orf116   | chromosome 1 open reading frame 116                                   |
| 0.593368399 | 0.01432 | 0.775930854 | 0.07494 C1orf174   | chromosome 1 open reading frame 174                                   |
| 0.738669032 | 0.00655 | 0.85797053  | 0.0709 C1orf21     | chromosome 1 open reading frame 21                                    |
| 0.857376037 | 0.03109 | 0.911933166 | 0.09887 C1orf50    | chromosome 1 open reading frame 50                                    |
| 1.257884972 | 0.0105  | 1.121166078 | 0.11521 C1orf61    | chromosome 1 open reading frame 61                                    |
| 0.765248385 | 0.01093 | 1.125838586 | 0.08612 C1orf68    | chromosome 1 open reading frame 68                                    |
| 0.708578698 | 0.01872 | 0.866336856 | 0.06188 C20orf108  | chromosome 20 open reading frame 108                                  |
| 1.23370717  | 0.04216 | 1.099616149 | 0.07196 C20orf29   | chromosome 20 open reading frame 29                                   |
| 1.236275261 | 0.03718 | 1.095052471 | 0.0592 C20orf54    | chromosome 20 open reading frame 54                                   |
| 0.81056512  | 0.04773 | 0.917040483 | 0.15033 C20orf7    | chromosome 20 open reading frame 7                                    |
| 1.285206337 | 0.01236 | 1.102669163 | 0.08821 C21orf115  | chromosome 21 open reading frame 115                                  |
| 1.174461971 | 0.03108 | 1.027401439 | 0.43213 C21orf59   | chromosome 21 open reading frame 59                                   |
| 1.307671349 | 0.01957 | 0.988970916 | 0.85449 C21orf7    | chromosome 21 open reading frame 7                                    |
| 0.682073917 | 0.00955 | 0.955282936 | 0.6089 C21orf91    | chromosome 21 open reading frame 91                                   |
| 1.244874235 | 0.0423  | 0.984184022 | 0.72115 C22orf32   | chromosome 22 open reading frame 32                                   |
| 1.214194884 | 0.01939 | 1.072761439 | 0.09419 C22orf43   | chromosome 22 open reading frame 43                                   |
| 1.257884972 | 0.04472 | 1.100378609 | 0.14065 C2orf71    | chromosome 2 open reading frame 71                                    |
| 0.601234624 | 0.00428 | 0.811689581 | 0.11099 C3orf23    | chromosome 3 open reading frame 23                                    |
| 0.747942879 | 0.02117 | 0.936921447 | 0.22925 C3orf54    | chromosome 3 open reading frame 54                                    |
| 1.45195828  | 0.04512 | 0.969289817 | 0.56203 C4orf49    | chromosome 4 open reading frame 49                                    |
| 1.45296505  | 0.0026  | 0.943365902 | 0.05303 C5orf92    | chromosome 5 open reading frame 92                                    |
| 0.511568735 | 0.00725 | 0.869047353 | 0.24539 C5orf46    | chromosome 5 open reading frame 46                                    |
| 0.726482525 | 0.02007 | 0.944747041 | 0.52373 C5orf53    | chromosome 5 open reading frame 53                                    |
| 1.209994089 | 0.03839 | 1.000693387 | 0.98139 C5orf56    | chromosome 5 open reading frame 56                                    |
| 1.245737416 | 0.01408 | 1.069547088 | 0.09781 C5orf63    | chromosome 5 open reading frame 63                                    |
| 1.244274952 | 0.04585 | 0.997231251 | 0.97155 C6orf115   | chromosome 6 open reading frame 115                                   |
| 1.190858849 | 0.00425 | 1.027401439 | 0.1397 C6orf123    | chromosome 6 open reading frame 123                                   |
| 0.498615626 | 0.00013 | 0.961260928 | 0.75143 C6orf15    | chromosome 6 open reading frame 15                                    |
| 1.350037985 | 0.03217 | 1.124278924 | 0.06107 C6orf165   | chromosome 6 open reading frame 165                                   |
| 0.803293997 | 0.0461  | 0.906261938 | 0.08747 C6orf35    | chromosome 6 open reading frame 35                                    |
| 0.85027416  | 0.03565 | 0.905639883 | 0.1611 C6orf64     | chromosome 6 open reading frame 64                                    |
| 1.209994089 | 0.03464 | 0.953355357 | 0.09828 C6orf97    | chromosome 6 open reading frame 97                                    |
| 1.356604327 | 0.01328 | 1.152686347 | 0.06677 C7orf23    | chromosome 7 open reading frame 23                                    |
| 1.265756594 | 0.02444 | 1.025267238 | 0.65675 C7orf44    | chromosome 7 open reading frame 44                                    |
| 0.61429349  | 0.00103 | 0.767373048 | 0.05345 C7orf64    | chromosome 7 open reading frame 64                                    |
| 1.340712592 | 0.01359 | 0.964598185 | 0.59118 C7orf69    | chromosome 7 open reading frame 69                                    |
| 0.718470088 | 0.01347 | 0.891928519 | 0.09115 C7orf73    | chromosome 7 open reading frame 73                                    |
| 1.262251002 | 0.03093 | 1.007276146 | 0.97019 C7orf167   | chromosome 7 open reading frame 167                                   |
| 1.257013375 | 0.02536 | 1.066585781 | 0.39581 C9orf21    | chromosome 9 open reading frame 21                                    |
| 1.20163605  | 0.0416  | 1.107264584 | 0.13181 C9orf4     | chromosome 9 open reading frame 4                                     |
| 0.668037039 | 0.01952 | 0.952637998 | 0.41593 C9orf5     | chromosome 9 open reading frame 5                                     |
| 1.62254311  | 0.01524 | 1.076986376 | 0.3239 C9orf91     | chromosome 9 open reading frame 91                                    |
| 0.734584317 | 0.00752 | 0.872123549 | 0.11813 CAL1       | carbonic anhydrase XII                                                |
| 0.813043185 | 0.03651 | 0.836826243 | 0.08015 CAB39L     | calcium binding protein 39-like                                       |
| 1.256142381 | 0.00824 | 1.043188594 | 0.31567 CACNA1C    | calcium channel, voltage-dependent, L type, alpha 1C subunit          |
| 1.307671349 | 0.01199 | 1.098092814 | 0.16906 CACNB1     | calcium channel, voltage-dependent, beta 1 subunit                    |
| 0.713012859 | 0.01054 | 0.924663278 | 0.2304 CACNB3      | calcium channel, voltage-dependent, beta 3 subunit                    |
| 0.821301701 | 0.0455  | 0.967947027 | 0.61988 CADM4      | cell adhesion molecule 4                                              |
| 1.59920257  | 0.00106 | 1.241427492 | 0.07183 CALCR1     | calcitonin receptor-like                                              |
| 0.671751713 | 0.00769 | 0.784040454 | 0.05532 CALML1     | calmodulin 1 (phosphorylase kinase, delta)                            |
| 1.351910833 | 0.00507 | 1.104198847 | 0.12898 CALU       | calumenin                                                             |
| 1.190856849 | 0.04353 | 1.081474763 | 0.235 CAMK2A       | calcium/calmodulin-dependent protein kinase II alpha                  |
| 0.679741421 | 0.04271 | 0.958599438 | 0.73528 CAMSAP2    | calmodulin regulated spectrin-associated protein family, member 2     |
| 1.621574834 | 0.00733 | 0.954007741 | 0.14545 CAMSAP3    | calmodulin regulated spectrin-associated protein family, member 3     |
| 0.737134609 | 0.03013 | 0.862143545 | 0.26372 CAMSAP3    | calmodulin regulated spectrin-associated protein family, member 3     |
| 1.396678532 | 0.0334  | 1.080725402 | 0.26221 CAND2      | cullin-associated and neddylation-dissociated 2 (putative)            |
| 1.336074078 | 0.03288 | 1.074749173 | 0.14832 CANT1      | calcium activated nucleotidase 1                                      |
| 1.388955136 | 0.00961 | 0.992777739 | 0.0975 CANT1       | calcium activated nucleotidase 1                                      |
| 0.529690167 | 0.04279 | 0.866336856 | 0.10275 CAPG       | capping protein (actin filament), gelsolin-like                       |
| 0.671217497 | 0.01544 | 0.956598158 | 0.62491 CAPN3      | calpain 3, (p94)                                                      |
| 0.666187413 | 0.0085  | 1.011852001 | 0.8959 CAPN3       | calpain 3, (p94)                                                      |
| 0.804966138 | 0.02989 | 0.962594443 | 0.55528 CARD14     | caspace recruitment domain family, member 14                          |
| 1.071735863 | 0.03783 | 0.831622098 | 0.16284 CASK       | calcium/calmodulin-dependent serine protein kinase (MAGUK family)     |
| 0.454989684 | 0.01413 | 1.044635763 | 0.6493 CASP8       | caspace 8, apoptosis-related cysteine peptidase                       |
| 0.770885177 | 0.00273 | 1.159095952 | 0.13153 CASZ1      | castor zinc finger 1                                                  |
| 0.58519321  | 0.00069 | 0.816203046 | 0.05659 CASZ1      | castor zinc finger 1                                                  |
| 0.667574152 | 0.00943 | 0.853817714 | 0.08488 CAT        | catalsase                                                             |
| 0.675487042 | 0.00637 | 0.950000383 | 0.49656 CAV1       | caveolin 1, caveolae protein, 22kDa                                   |
| 0.77382497  | 0.04553 | 0.917639882 | 0.1981 CBAF2T2     | core-binding factor, runt domain, alpha subunit 2; translocated to, 2 |
| 1.216722359 | 0.00363 | 1.121166078 | 0.27589 CBL8       | Cas-B-N (murine) ecotropic retroviral transforming sequence C         |
| 0.620283649 | 0.00926 | 0.887831337 | 0.18577 CBL8       | Cas-B-N (murine) ecotropic retroviral transforming sequence C         |
| 1.31494276  | 0.0132  | 1.085981856 | 0.09736 CBS        | cystathionine-beta-synthase                                           |
| 1.300440147 | 0.0146  | 1.078480432 | 0.46359 CBX4       | chromobox homolog 4                                                   |
| 1.194163187 | 0.0194  | 1.042465761 | 0.49788 CDC169     | colled-coil domain containing 169                                     |
| 0.625898229 | 0.00262 | 0.860352631 | 0.12134 CDC47      | colled-coil domain containing 47                                      |
| 1.224336392 | 0.02926 | 1.090507733 | 0.12898 CDC50      | colled-coil domain containing 50                                      |
| 1.544350266 | 0.01789 | 0.967947027 | 0.7876 CDC50       | colled-coil domain containing 50                                      |
| 0.607097442 | 0.00536 | 0.889458994 | 0.15243 CDC56      | colled-coil domain containing 56                                      |
| 1.271031689 | 0.02627 | 1.104198847 | 0.09841 CDC63      | colled-coil domain containing 63                                      |
| 1.235418637 | 0.04213 | 0.992404375 | 0.84918 CDC66      | colled-coil domain containing 66                                      |
| 1.434949535 | 0.00272 | 0.994701609 | 0.94324 CDC68      | colled-coil domain containing 68                                      |
| 1.151089491 | 0.04933 | 0.948684315 | 0.5999 CDC85B      | colled-coil domain containing 85B                                     |
| 1.20664392  | 0.02594 | 1.047536127 | 0.50786 CCL16      | chemokine (C-C motif) ligand 16                                       |
| 0.770037174 | 0.01811 | 0.899378312 | 0.0525 CCL28       | chemokine (C-C motif) ligand 28                                       |
| 2.100889088 | 0.0002  | 1.203303026 | 0.09065 CCL8       | chemokine (C-C motif) ligand 8                                        |
| 1.394743666 | 0.00627 | 1.001387256 | 0.98578 CNCL       | cyclin H-like                                                         |
| 1.173748437 | 0.00541 | 1.159095952 | 0.20892 CCN1L1     | cyclin Y-like 1                                                       |
| 1.59549048  | 0.0062  | 1.182631    | 0.25266 CCN1L1     | cyclin Y-like 1                                                       |
| 1.358486285 | 0.03289 | 1.218410264 | 0.05331 CCR5       | chemokine (C-C motif) receptor 5                                      |
| 1.338113431 | 0.00932 | 0.91319825  | 0.15696 CCTS       | chaperonin containing TCP1, subunit 5 (epsilon)                       |
| 0.73885257  | 0.00089 | 1.107264584 | 0.10677 CD160      | CD160 molecule                                                        |
| 1.262251002 | 0.01244 | 1.062159186 | 0.16177 CD10       | CD10 molecule                                                         |
| 1.215036792 | 0.00639 | 1.10343374  | 0.09816 CD40L6     | CD40 ligand                                                           |
| 0.693515485 | 0.01246 | 0.877213549 | 0.09315 CD44       | CD44 molecule (Indian blood group)                                    |
| 0.679741421 | 0.0261  | 1.071773463 | 0.31485 CD47       | CD47 molecule                                                         |
| 1.479387509 | 0.00182 | 1.203303026 | 0.0795 CD48        | CD48 molecule                                                         |
| 1.318959614 | 0.02512 | 1.110338834 | 0.22457 CD6        | CD6 molecule                                                          |
| 1.121167265 | 0.04436 | 1.124399903 | 0.07888 CD70       | CD70 molecule                                                         |
| 1.278985581 | 0.00336 | 1.126619228 | 0.09533 CD86       | CD86 molecule                                                         |
| 1.308578071 | 0.01022 | 1.240567298 | 0.07396 CD86       | CD86 molecule                                                         |
| 1.17772279  | 0.0393  | 1.102669163 | 0.1206 CD88        | CD88 molecule                                                         |
| 0.7031966   | 0.00248 | 0.821310701 | 0.07385 CD9        | CD9 molecule                                                          |
| 0.840262964 | 0.03977 | 1.057979684 | 0.22124 CDC25C     | cell division cycle 25 homolog C (S. pombe)                           |

|             |         |              |         |             |                                                                                        |
|-------------|---------|--------------|---------|-------------|----------------------------------------------------------------------------------------|
| 1.169587664 | 0.03465 | 0.972654047  | 0.58001 | CDHR8       | cadherin 8, type 2                                                                     |
| 0.814507563 | 0.03749 | 0.901250463  | 0.18596 | CDHR1       | cadherin-related family member 1                                                       |
| 1.374588696 | 0.02919 | 1.108800644  | 0.23536 | CDKN1B      | cyclin-dependent kinase inhibitor 1B (p27, Kip1)                                       |
| 1.223488041 | 0.04546 | 1.034547582  | 0.45304 | CDKN2A      | cyclin-dependent kinase inhibitor 2A (melanoma, p16, inhibits CDK4)                    |
| 0.701249625 | 0.00456 | 0.727904342  | 0.06594 | CDKN2B      | cyclin-dependent kinase inhibitor 2B (p15, inhibits CDK4)                              |
| 1.183451022 | 0.03108 | 0.948023965  | 0.24339 | CDFP        | cerebral dopamine neurotrophic factor                                                  |
| 1.221793102 | 0.03162 | 1.080725402  | 0.20004 | CDO1        | cysteine dioxygenase, type I                                                           |
| 1.297378767 | 0.03401 | 1.105969472  | 0.05667 | CDRT4       | CMT1A duplicated region transcript 4                                                   |
| 0.262065619 | 0.00155 | 0.671571713  | 0.11198 | CDSN        | corneodesmosin                                                                         |
| 0.765248385 | 0.04239 | 0.917639882  | 0.27338 | CDT1        | chromatin licensing and DNA replication factor 1                                       |
| 0.581965265 | 0.01158 | 0.833319044  | 0.08723 | CEBPB       | CCAAT/enhancer binding protein (C/EBP), alpha                                          |
| 1.681792831 | 0.00212 | 1.221793102  | 0.06086 | CELF2       | CUGBP, Elav-like family member 2                                                       |
| 1.309485423 | 0.02072 | 1.114966219  | 0.11861 | CELSR3      | cadherin, EGF LAG seven-pass G-type receptor 3 (Flamingo homolog, Drosophila)          |
| 0.614719434 | 0.00064 | 0.891928519  | 0.06037 | CENPF       | centromere protein F, 350/400kDa (mitosin)                                             |
| 1.182631    | 0.03545 | 1.064370182  | 0.32816 | CEP128      | centrosomal protein 128kDa                                                             |
| 1.667862088 | 0.00648 | 1.062159186  | 0.40976 | CEP128      | centrosomal protein 128kDa                                                             |
| 1.29232831  | 0.01796 | 1.132287138  | 0.24339 | CDFP        | centrosomal protein 68kDa                                                              |
| 0.600818025 | 0.00865 | 0.935623498  | 0.53564 | CERS3       | ceramide synthase 3                                                                    |
| 1.260503392 | 0.03952 | 1.083725967  | 0.206   | CFHR4       | complement factor H-related 4                                                          |
| 1.501079098 | 0.00342 | 1.106497353  | 0.20397 | CFLAR       | CASP8 and FADD-like apoptosis regulator                                                |
| 1.486582984 | 0.03794 | 0.998132373  | 0.20716 | CHAC2       | Chac, cation transport regulator homolog 2 (E. coli)                                   |
| 1.145517898 | 0.01943 | 1.038859173  | 0.43294 | CHDH        | choline dehydrogenase                                                                  |
| 1.190031696 | 0.04555 | 1.088242442  | 0.164   | CHKA        | choline kinase alpha                                                                   |
| 0.794985251 | 0.0421  | 0.890692901  | 0.07504 | CHML        | choroideremia-like (Rab escort protein 2)                                              |
| 1.453972517 | 0.02719 | 1.143138335  | 0.11723 | CHN2        | chimerin (chimaerin) 2                                                                 |
| 0.607518396 | 0.00239 | 0.870550563  | 0.18585 | CHP2        | calcineurin B homologous protein 2                                                     |
| 1.397646972 | 0.01372 | 1.0132569    | 0.82954 | CHPT1       | choline phosphotransferase 1                                                           |
| 2.122846418 | 0.02709 | 1.204137381  | 0.27229 | CHRD1L      | chordin-like 1                                                                         |
| 0.632878297 | 0.00938 | 0.876605721  | 0.18345 | CHRNA3      | cholinergic receptor, nicotinic, alpha 3                                               |
| 1.223488041 | 0.03116 | 1.092020546  | 0.07714 | CHRNA4      | cholinergic receptor, nicotinic, alpha 4                                               |
| 1.454980884 | 0.01119 | 1.108032348  | 0.05747 | CHST4       | carbohydrate (N-acetylglucosamine 6-O) sulfotransferase 4                              |
| 1.345367209 | 0.01447 | 1.138369413  | 0.08434 | CHST7       | carbohydrate (N-acetylglucosamine 6-O) sulfotransferase 7                              |
| 0.758086396 | 0.01921 | 0.917491429  | 0.12955 | CINP        | cyclin-dependent kinase 2 interacting protein                                          |
| 0.62676651  | 0.00335 | 0.886381699  | 0.26306 | CKB         | creatine kinase, brain                                                                 |
| 1.293248932 | 0.01349 | 1.209994089  | 0.07323 | CKLF        | chemokine-like factor                                                                  |
| 0.768970416 | 0.01167 | 0.921464186  | 0.22345 | CLASP1      | cytoplasmic linker associated protein 1                                                |
| 1.401527449 | 0.03795 | 1.125838586  | 0.18762 | CLC         | Charcot-Leyden crystal protein                                                         |
| 0.541487523 | 0.01943 | 1.038859173  | 0.43294 | CHDH        | choline dehydrogenase                                                                  |
| 1.332374825 | 0.00334 | 1.106497353  | 0.11935 | CLCNKB      | chloride channel Kb                                                                    |
| 0.712518807 | 0.03992 | 0.668500248  | 0.09721 | CLDN17      | claudin 17                                                                             |
| 1.227735684 | 0.0223  | 1.042465761  | 0.45181 | CLDN6       | claudin 6                                                                              |
| 0.801069878 | 0.03613 | 1.009051634  | 0.85733 | CLDN6       | claudin 6                                                                              |
| 0.64940815  | 0.03121 | 1.0404966138 | 0.22386 | CLDN1       | claudin domain containing 1                                                            |
| 1.279872414 | 0.03408 | 1.080725402  | 0.32026 | CLEC2D      | C-type lectin domain family 2, member D                                                |
| 1.379369022 | 0.01397 | 1.131314463  | 0.1341  | CLEC2D      | C-type lectin domain family 2, member D                                                |
| 1.255271991 | 0.02988 | 1.097331938  | 0.15526 | CLECA4      | C-type lectin domain family 4, member A                                                |
| 1.53261996  | 0.04806 | 1.070286698  | 0.50558 | CLIC5       | chloride intracellular channel 5                                                       |
| 1.390819372 | 0.01086 | 1.057750964  | 0.39235 | CLIP3       | CAP-GLY domain containing linker protein 3                                             |
| 0.461371246 | 0.01663 | 0.948133796  | 0.07102 | CLTB        | clathrin, light chain B                                                                |
| 1.787570325 | 0.003   | 0.261377949  | 0.0942  | CMAP8       | cytine monophospho-N-acetylneuraminic acid hydroxylase, pseudogene                     |
| 1.180174343 | 0.04684 | 1.047536127  | 0.38363 | CMT1M       | CKL-like MARVEL transmembrane domain containing 1                                      |
| 0.815637493 | 0.04322 | 0.938221197  | 0.4873  | CNKR3       | CNKR family member 3                                                                   |
| 1.167158102 | 0.0448  | 1.040300267  | 0.46667 | CNNM1       | cyclin M1                                                                              |
| 0.770037174 | 0.02133 | 0.940174203  | 0.67737 | CNOT1       | CCR4-NOT transcription complex, subunit 1                                              |
| 0.715984371 | 0.03408 | 1.080725402  | 0.12558 | CNOT1       | CCR4-NOT transcription complex, subunit 1                                              |
| 0.684441907 | 0.00888 | 0.803850991  | 0.05656 | CNOT7       | CCR4-NOT transcription complex, subunit 7                                              |
| 1.605474777 | 0.02394 | 1.072516617  | 0.3956  | CNR1        | cannabinoid receptor 1 (brain)                                                         |
| 0.717972255 | 0.01475 | 0.842062954  | 0.085   | CNST        | connorsin, connexin sorting protein                                                    |
| 1.215036792 | 0.03176 | 1.101905116  | 0.27085 | CNTLN       | centrin, centrosomal protein                                                           |
| 1.214194884 | 0.0236  | 1.074919173  | 0.21971 | CNTNA       | contactin 4                                                                            |
| 0.814507563 | 0.02194 | 0.877821798  | 0.05914 | COG2        | component of oligomeric golgi complex 2                                                |
| 0.813379198 | 0.04456 | 1.00486382   | 0.9366  | COG4        | component of oligomeric golgi complex 4                                                |
| 1.505246747 | 0.03818 | 1.184271612  | 0.07299 | COL4A4      | collagen, type IV, alpha 4                                                             |
| 0.645281245 | 0.0038  | 0.922742493  | 0.29669 | COL7A1      | collagen, type VII, alpha 1                                                            |
| 0.700763725 | 0.00051 | 0.881480158  | 0.05011 | COMMD1      | copper metabolism (Murr1) domain containing 1                                          |
| 0.78024548  | 0.02194 | 0.92213118   | 0.29638 | COMMD5      | COMMD domain containing 5                                                              |
| 0.342933322 | 0.00693 | 0.79774524   | 0.36768 | COMP        | cartilage oligomeric matrix protein                                                    |
| 1.205807828 | 0.02283 | 1.047536127  | 0.46689 | COQ10A      | coenzyme Q10 homolog A (S. cerevisiae)                                                 |
| 0.743806881 | 0.0407  | 0.834509281  | 0.06588 | COX16       | COX16 cytochrome c oxidase assembly homolog (S. cerevisiae)                            |
| 1.270150983 | 0.03422 | 1.050445444  | 0.43322 | COX18       | COX18 cytochrome c oxidase assembly homolog (S. cerevisiae)                            |
| 0.664342907 | 0.03239 | 0.929492823  | 0.12095 | COX2        | cytochrome c oxidase subunit IIb polypeptide 1 (ubiquitous)                            |
| 1.208117843 | 0.02486 | 1.119612889  | 0.08879 | CPAMD8      | C3 and P2P-like, alpha-2-macroglobulin domain containing 8                             |
| 1.42800398  | 0.04518 | 1.031683179  | 0.76578 | CPFB4       | cytoplasmic polyadenylation element binding protein 4                                  |
| 0.7944344   | 0.01273 | 0.936921447  | 0.40906 | CPSF2       | cleavage and polyadenylation specific factor 2, 100kDa                                 |
| 0.76424116  | 0.02706 | 0.865736566  | 0.09611 | CPSF2       | cleavage and polyadenylation specific factor 2, 100kDa                                 |
| 1.225185332 | 0.02208 | 1.017499692  | 0.72229 | CPSF4       | cleavage and polyadenylation specific factor 4, 30kDa                                  |
| 1.196548962 | 0.02874 | 1.030108698  | 0.15884 | CP1A        | caranine palmitoyltransferase 1A (iver)                                                |
| 0.682546859 | 0.03139 | 0.84264683   | 0.20516 | CREB1       | cAMP responsive element binding protein 1                                              |
| 1.901318202 | 0.00916 | 1.016070143  | 0.90978 | CREM        | cAMP responsive element modulator                                                      |
| 1.217566019 | 0.01224 | 0.979420298  | 0.65137 | CHR1        | corticotropin releasing hormone receptor 1                                             |
| 1.316769922 | 0.03225 | 1.034547582  | 0.63529 | CRTRM       | cytotoxic and regulatory T cell molecule                                               |
| 1.336074078 | 0.00548 | 0.870223237  | 0.33807 | CRYM4       | crystallin, beta M4                                                                    |
| 1.225185332 | 0.0476  | 1.046810282  | 0.4327  | CRYGD       | crystallin, gamma D                                                                    |
| 0.645281245 | 0.00721 | 0.920825697  | 0.23689 | CSE1        | cold shock domain containing E1, RNA-binding                                           |
| 1.246601194 | 0.01348 | 1.084477409  | 0.31869 | CSF2RA      | colony stimulating factor 2 receptor, alpha, low-affinity (granulocyte-macrophage)     |
| 0.660211421 | 0.01523 | 0.840313752  | 0.05113 | CSNK1G3     | casein kinase 1, gamma 3                                                               |
| 0.737346609 | 0.04804 | 0.890075733  | 0.2355  | CSTF1       | cleavage stimulation factor, 3' pre-RNA, subunit 1, 50kDa                              |
| 1.51361793  | 0.04368 | 0.997231251  | 0.86982 | CTBS        | chitinase, di-N-acetyl                                                                 |
| 0.65495911  | 0.00144 | 0.931740429  | 0.27751 | CTDPSL      | CTD (carboxy-terminal domain, RNA polymerase II, polypeptide A) small phosphatase-like |
| 0.738157203 | 0.01158 | 0.946713631  | 0.3397  | CTPS2       | CTP synthase II                                                                        |
| 0.544121221 | 0.01602 | 0.76418826   | 0.07982 | CTTNBP2NL   | CTTNBP2 N-terminal like                                                                |
| 0.74949801  | 0.03866 | 0.929804943  | 0.41852 | CUL2        | culin 2                                                                                |
| 0.736523843 | 0.03252 | 0.967272633  | 0.74054 | CUL4B       | culin 4B                                                                               |
| 0.628071191 | 0.01868 | 0.988132373  | 0.13567 | CUX1        | cut-like homeobox 1                                                                    |
| 1.264003098 | 0.00694 | 1.036701101  | 0.40123 | CUX2        | cut-like homeobox 2                                                                    |
| 0.421907898 | 0.00063 | 0.76684133   | 0.22404 | CXADR       | coxsaackie virus and adenovirus receptor                                               |
| 2.703821666 | 0.00187 | 1.356604327  | 0.13501 | CXCL2       | chemokine (C-X-C motif) ligand 2                                                       |
| 1.811267966 | 0.00976 | 1.07733145   | 0.68889 | CXCL3       | chemokine (C-X-C motif) ligand 3                                                       |
| 1.347296337 | 0.01128 | 1.091498705  | 0.14791 | CXCL5       | chemokine (C-X-C motif) ligand 5                                                       |
| 1.234562607 | 0.02183 | 1.111879158  | 0.07472 | CXCR6       | chemokine (C-X-C motif) receptor 6                                                     |
| 1.237990291 | 0.02152 | 1.056285625  | 0.14222 | CXCR7       | chemokine (C-X-C motif) receptor 7                                                     |
| 1.486582984 | 0.03828 | 1.174461971  | 0.08523 | CXC5        | CXC5 finger protein 5                                                                  |
| 1.540074348 | 0.02362 | 1.119612889  | 0.18856 | CXC5        | CXC5 finger protein 5                                                                  |
| 1.228438867 | 0.04048 | 1.065881565  | 0.37971 | CYP21B1     | cytochrome P450, family 27, subfamily B, polypeptide 1                                 |
| 1.460168633 | 0.00376 | 0.997231251  | 0.97088 | CYP2A13     | cytochrome P450, family 2, subfamily A, polypeptide 13                                 |
| 0.670821112 | 0.0072  | 0.823020345  | 0.06967 | CYP2C9      | cytochrome P450, family 2, subfamily C, polypeptide 9                                  |
| 1.150291893 | 0.04403 | 0.972654047  | 0.75923 | CYP2E1      | cytochrome P450, family 2, subfamily A, polypeptide 1                                  |
| 0.652928994 | 0.00006 | 0.943438251  | 0.39463 | CYP39A1     | cytochrome P450, family 39, subfamily A, polypeptide 1                                 |
| 1.55581027  | 0.02313 | 1.20664392   | 0.19994 | CYS1TR1     | cysteinyl leukotriene receptor 1                                                       |
| 1.1297071   | 0.03303 | 0.990577733  | 0.07195 | CYS1TR2     | cysteinyl leukotriene receptor 2                                                       |
| 1.358486285 | 0.0256  | 1.215036792  | 0.1251  | DAB2        | disabled homolog 2, mitogen-responsive phosphoprotein (Drosophila)                     |
| 1.242288282 | 0.01362 | 1.091263877  | 0.16219 | DAB2        | disabled homolog 2, mitogen-responsive phosphoprotein (Drosophila)                     |
| 1.254402205 | 0.03203 | 1.040300267  | 0.37918 | DACH1       | dachshund homolog 1 (Drosophila)                                                       |
| 1.246601194 | 0.00396 | 1.096571589  | 0.19802 | DACT3       | dapper, antagonist of beta-catenin, homolog 3 (Xenopus laevis)                         |
| 0.794985251 | 0.01521 | 0.971980898  | 0.56119 | DAGL8       | diacylglycerol lipase, beta                                                            |
| 0.756283999 | 0.04398 | 0.906890329  | 0.17033 | DAPP1       | dual adaptor of phosphotyrosine and 3-phosphoinositides                                |
| 0.731028724 | 0.04918 | 0.939522749  | 0.22734 | DAZP1       | DAZ associated protein 1                                                               |
| 1.450952208 | 0.03519 | 1.099616149  | 0.07001 | DAZL        | deleted in azoospermia-like                                                            |
| 0.56482202  | 0.00945 | 0.76684133   | 0.07715 | DBT         | dihydroipoamide branched chain transacylase E2                                         |
| 0.775393206 | 0.0476  | 0.880869374  | 0.07214 | DCAF10      | DBP1 and CUL4 associated factor 10                                                     |
| 0.772175133 | 0.01776 | 0.951318276  | 0.42587 | DCAF5       | DBP1 and CUL4 associated factor 5                                                      |
| 1.348167732 | 0.02315 | 1.090507733  | 0.28734 | DCAF8       | DBP1 and CUL4 associated factor 8                                                      |
| 0.763129604 | 0.02476 | 0.909408252  | 0.12871 | DCLRE1C     | DNA cross-link repair 1C                                                               |
| 0.284795844 | 0.01289 | 0.84388624   | 0.05082 | DCT         | dopachrome tautomerase (dopachrome delta-isomerase, tyrosine-related protein 2)        |
| 0.89974914  | 0.00119 | 0.771105413  | 0.16723 | DCT         | dopachrome tautomerase (dopachrome delta-isomerase, tyrosine-related protein 2)        |
| 0.419574819 | 0.00342 | 0.885153765  | 0.17463 | DCT         | dopachrome tautomerase (dopachrome delta-isomerase, tyrosine-related protein 2)        |
| 0.666187413 | 0.01944 | 0.883027531  | 0.13048 | DDAH2       | dimethylarginine dimethylaminohydrolase 2                                              |
| 0.578344092 | 0.03757 | 0.919550046  | 0.3122  | DDAH2       | dimethylarginine dimethylaminohydrolase 2                                              |
| 1.866667886 | 0.0356  | 1.125838586  | 0.19596 | DDHD1       | DDHD domain containing 1                                                               |
| 0.590087172 | 0.01813 | 0.85797653   | 0.0702  | DDR1        | discoidin domain receptor tyrosine kinase 1                                            |
| 0.60333196  | 0.01571 | 0.92019551   | 0.25201 | DDR1        | discoidin domain receptor tyrosine kinase 1                                            |
| 0.62546454  | 0.02615 | 0.8962667    | 0.15208 | DDR1        | discoidin domain receptor tyrosine kinase 1                                            |
| 0.79774524  | 0.03712 | 0.901250463  | 0.21006 | DDX11       | DEAD/H (Asp-Glu-Ala-Asp/His) box polypeptide 11                                        |
| 0.697371833 | 0.02739 | 0.878430468  | 0.05215 | DDX27       | DEAD (Asp-Glu-Ala-Asp) box polypeptide 27                                              |
| 0.79536484  | 0.0491  | 0.85595026   | 0.08848 | DDX58       | DEAD (Asp-Glu-Ala-Asp) box polypeptide 58                                              |
| 0.807201075 | 0.04802 | 0.93288466   | 0.22704 | DDX6        | DEAD (Asp-Glu-Ala-Asp) box polypeptide 6                                               |
| 1.121167265 | 0.04933 | 1.095425989  | 0.05942 | DDXND5B     | DEN1/WADD domain containing 5B                                                         |
| 0.804406371 | 0.03038 | 0.890075733  | 0.11837 | DGCR2       | DiGeorge syndrome critical region gene 2                                               |
| 0.821880187 | 0.03332 | 0.986232704  | 0.82414 | DHR87B      | dehydrogenase/reductase (SDR family) member 7B                                         |
| 0.731028724 | 0.02915 | 0.931740429  | 0.29726 | DHX57       | DEAH (Asp-Glu-Ala-Asp/His) box polypeptide 57                                          |
| 0.73058379  | 0.02398 | 0.920825697  | 0.34771 | DIDO1       | death inducer-oligomer 1                                                               |
| 0.740498801 | 0.01454 | 0.829486386  | 0.13454 | DID2        | dielsinase, iodothyronine, type II                                                     |
| 0.691116103 | 0.01631 | 0.87175824   | 0.12579 | DIS3        | DIS3 mitotic control homolog (S. cerevisiae)                                           |
| 0.710546022 | 0.00334 | 0.906261938  | 0.11159 | DIS3L2      | DIS3 mitotic control homolog (S. cerevisiae)-like 2                                    |
| 1.202469249 | 0.02042 | 0.995159722  | 0.9259  | DKFZp451A21 | DKFZp451A21 protein                                                                    |
| 0.754712984 | 0.01737 | 0.920187651  | 0.11049 | DLG2        | discs, large homolog 2 (Drosophila)                                                    |
| 0.637722196 | 0.00162 | 0.831624998  | 0.07184 | DLX5        | distal-less homeobox 5                                                                 |
|             |         |              |         |             |                                                                                        |

|             |         |             |         |          |                                                                             |
|-------------|---------|-------------|---------|----------|-----------------------------------------------------------------------------|
| 1.240567298 | 0.02315 | 1.05553718  | 0.27931 | DNAH1    | dynein, axonemal, heavy chain 1                                             |
| 1.182631    | 0.04752 | 1.043911927 | 0.30389 | DNAH5    | dynein, axonemal, heavy chain 5                                             |
| 1.277213759 | 0.00292 | 1.057018041 | 0.50433 | DNAJB5   | DnaJ (Hsp40) homolog, subfamily B, member 5                                 |
| 1.20664392  | 0.0285  | 1.018891197 | 0.72563 | DNAJC14  | DnaJ (Hsp40) homolog, subfamily C, member 14                                |
| 1.322524605 | 0.01988 | 1.016070143 | 0.82282 | DNAJC3   | DnaJ (Hsp40) homolog, subfamily C, member 3                                 |
| 1.251796455 | 0.01424 | 1.083725967 | 0.74921 | DNAJCSB  | DnaJ (Hsp40) homolog, subfamily C, member 5 beta                            |
| 1.264003098 | 0.0327  | 1.00765376  | 0.91573 | DNAL1    | dynein, axonemal, light intermediate chain 1                                |
| 0.829894586 | 0.04589 | 0.947370071 | 0.27705 | DNAE1    | deoxyribonuclease I                                                         |
| 0.84400887  | 0.02579 | 0.982139595 | 0.84501 | DOCK1    | dedicator of cytokinesis 1                                                  |
| 0.810003474 | 0.02563 | 1.041021598 | 0.54137 | DOCK6    | dedicator of cytokinesis 6                                                  |
| 1.281547924 | 0.0116  | 1.084477409 | 0.82293 | DOCK8    | dedicator of cytokinesis 8                                                  |
| 1.719512972 | 0.01015 | 1.22010051  | 0.10362 | DOCK8    | dedicator of cytokinesis 8                                                  |
| 1.281647924 | 0.02731 | 1.142346247 | 0.15933 | DOCK9    | dedicator of cytokinesis 9                                                  |
| 1.143138335 | 0.04376 | 1.018891197 | 0.65573 | DOHH     | deoxyhypusine hydroxylase/monooxygenase                                     |
| 1.286989247 | 0.03084 | 1.009051634 | 0.92708 | DOK1     | docking protein 1, 62kDa (downstream of tyrosine kinase 1)                  |
| 1.231988073 | 0.01683 | 1.033114388 | 0.61572 | DPY7     | dipeptidyl-peptidase 7                                                      |
| 1.344343994 | 0.03651 | 0.922103118 | 0.11635 | DPY19L4  | dpy-19-like 4 (C. elegans)                                                  |
| 1.220946513 | 0.04927 | 1.021012126 | 0.72296 | USCAM    | Down syndrome cell adhesion molecule                                        |
| 1.194163187 | 0.04268 | 1.017479692 | 0.66573 | DCR6     | Down syndrome critical region gene 6                                        |
| 0.764718139 | 0.02183 | 1.172834949 | 0.09975 | DST      | dystonin                                                                    |
| 0.643048742 | 0.0122  | 0.959545318 | 0.55856 | DST      | dystonin                                                                    |
| 0.436313353 | 0.01109 | 0.938217292 | 0.12123 | DS1      | dystonin                                                                    |
| 1.286890247 | 0.02111 | 1.068805991 | 0.3772  | DTNBP1   | dystrobrevin binding protein 1                                              |
| 1.626758396 | 0.04653 | 1.325007017 | 0.05677 | DUOX2    | dual oxidase 2                                                              |
| 1.625631204 | 0.0024  | 1.085229372 | 0.5768  | DUSP1    | dual specificity phosphatase 1                                              |
| 1.783857039 | 0.00198 | 1.204972315 | 0.14862 | DUSP6    | dual specificity phosphatase 6                                              |
| 1.823866331 | 0.00116 | 1.268489777 | 0.11394 | DUSP6    | dual specificity phosphatase 6                                              |
| 1.589970502 | 0.0383  | 0.974004472 | 0.53778 | DUSP6    | dual specificity phosphatase 6                                              |
| 1.229438867 | 0.03936 | 1.038139271 | 0.58553 | DUSP9    | dual specificity phosphatase 9                                              |
| 0.736623843 | 0.02454 | 0.938871747 | 0.24412 | DYNLRB1  | dynein, light chain, roadblock-type 1                                       |
| 1.121512819 | 0.01736 | 1.022428531 | 0.77207 | DYRK3    | dual-specificity tyrosine-(Y)-phosphorylation regulated kinase 3            |
| 1.225185332 | 0.04992 | 1.001387256 | 0.98146 | E2F5     | E2F transcription factor 5, p130-binding                                    |
| 1.341542225 | 0.01129 | 0.949201646 | 0.8537  | E3H3     | eryol Coa hydratase domain containing 3                                     |
| 0.808320869 | 0.03903 | 1.00695555  | 0.84824 | EEF1A1   | eukaryotic translation elongation factor 1 alpha 1                          |
| 0.84323111  | 0.03211 | 1.054822317 | 0.32048 | EFCAB6   | EF-hand calcium binding domain 6                                            |
| 1.375541818 | 0.04321 | 1.165541198 | 0.11387 | EFD1     | EF-hand domain family, member D1                                            |
| 1.478362431 | 0.024   | 1.326845141 | 0.06389 | EGRF     | epidermal growth factor receptor                                            |
| 2.061936538 | 0.01129 | 1.447932972 | 0.17499 | EGRI     | early growth response 1                                                     |
| 1.464085696 | 0.00576 | 1.316766922 | 0.06291 | EGRI     | early growth response 1                                                     |
| 1.658639092 | 0.04049 | 1.036701101 | 0.80802 | EGR2     | early growth response 2                                                     |
| 1.245737416 | 0.03819 | 1.038859103 | 0.67249 | EH3      | EH-domain containing 3                                                      |
| 1.285206337 | 0.02171 | 1.05750964  | 0.21615 | EID2B    | EP300 interacting inhibitor of differentiation 2B                           |
| 1.706452196 | 0.00039 | 1.160703914 | 0.15475 | EIF2A3   | eukaryotic translation initiation factor 2-alpha kinase 3                   |
| 0.816768991 | 0.04461 | 0.935623498 | 0.09975 | EIF2B3   | eukaryotic translation initiation factor 2B, subunit 3 gamma, 58kDa         |
| 0.733333843 | 0.02316 | 0.965936329 | 0.56364 | EIF2B4   | eukaryotic translation initiation factor 2B, subunit 4, delta, 67kDa        |
| 0.79774524  | 0.02082 | 0.948026965 | 0.28329 | EIF3L    | eukaryotic translation initiation factor 3, subunit L                       |
| 0.758383773 | 0.00156 | 1.033114388 | 0.56268 | EIF4E2   | eukaryotic translation initiation factor 4E family member 2                 |
| 0.679714121 | 0.03356 | 0.942784536 | 0.42352 | EIF4E2   | eukaryotic translation initiation factor 4E family member 2                 |
| 1.735603373 | 0.01335 | 0.893785162 | 0.17335 | EIF6P2   | eukaryotic translation initiation factor 4E binding protein 2               |
| 0.577542893 | 0.03972 | 0.8324098   | 0.05678 | EIF4G1   | eukaryotic translation initiation factor 4 gamma, 1                         |
| 0.582366793 | 0.04874 | 0.891928519 | 0.16313 | EIF6     | eukaryotic translation initiation factor 6                                  |
| 2.146520573 | 0.00099 | 1.320422841 | 0.05517 | ELF3     | E74-like factor 3 (ets domain transcription factor, epithelial-specific 1)  |
| 0.53515412  | 0.00505 | 0.787307977 | 0.2039  | ELF5     | E74-like factor 5 (ets domain transcription factor)                         |
| 1.251796459 | 0.03573 | 1.137605228 | 0.05466 | ELL      | elongation factor RNA polymerase II                                         |
| 1.221793102 | 0.02941 | 0.949842015 | 0.33683 | ELOV5    | ELOV1 fatty acid elongase 5                                                 |
| 0.81056512  | 0.00459 | 0.902500727 | 0.20155 | ELP4     | elongation protein 4 homolog (S. cerevisiae)                                |
| 1.188383105 | 0.03738 | 1.035982764 | 0.54225 | ELSPBP1  | epididymal sperm binding protein 1                                          |
| 1.238848698 | 0.05153 | 1.141554707 | 0.05265 | EMID1    | EMI domain containing 1                                                     |
| 0.70514898  | 0.01586 | 0.951977908 | 0.69814 | EMILIN3  | elastin microfibril interface 3                                             |
| 0.558265481 | 0.0109  | 0.938585846 | 0.24128 | EM14     | ectoderm-microtubule associated protein like 4                              |
| 0.674551267 | 0.02933 | 0.945402117 | 0.4164  | EMP2     | epithelial membrane protein 2                                               |
| 1.33422317  | 0.01465 | 1.121943481 | 0.07688 | EMR3     | egf-like module containing, mucin-like, hormone receptor-like 3             |
| 1.199971382 | 0.04406 | 1.025978145 | 0.54832 | EN2      | engrailed homeobox 2                                                        |
| 1.256142381 | 0.02596 | 1.053961036 | 0.46327 | ENAM     | enamelin                                                                    |
| 1.21167266  | 0.03755 | 1.106497553 | 0.23155 | ENCL1    | ectodermal-neural cortex 1 (with BTB-like domain)                           |
| 0.79774524  | 0.00797 | 0.901692001 | 0.1521  | ENDOV4   | endonuclease V                                                              |
| 1.570256237 | 0.00577 | 1.462057448 | 0.07942 | ENPEP    | glutamyl aminopeptidase (aminopeptidase A)                                  |
| 1.440929749 | 0.00408 | 1.074004472 | 0.17137 | ENPP4    | ectonucleotide pyrophosphatase/phosphodiesterase 4 (putative)               |
| 0.768970416 | 0.02392 | 0.938871747 | 0.22475 | ENY2     | enhancer of yellow 2 homolog (Drosophila)                                   |
| 1.210367992 | 0.02004 | 1.03582764  | 0.5011  | EPAS1    | endothelial PAS domain protein 1                                            |
| 0.782524296 | 0.01335 | 1.146526547 | 0.26128 | EPHA1    | erythrocyte membrane protein band 4.1 (piliptocytosis 1, RH-linked)         |
| 0.740498001 | 0.00164 | 0.930449658 | 0.26182 | EPHA1L4B | erythrocyte membrane protein band 4.1 like 4B                               |
| 1.212512819 | 0.03774 | 1.0453601   | 0.54668 | EPHA10   | EPH receptor A10                                                            |
| 0.541487523 | 0.01418 | 0.89564567  | 0.13488 | EPHA4    | EPH receptor A4                                                             |
| 1.30224419  | 0.04044 | 1.140763716 | 0.24542 | EPHA7    | EPH receptor A7                                                             |
| 1.780151467 | 0.02477 | 1.371733289 | 0.08668 | EPHA7    | EPH receptor A7                                                             |
| 1.701721459 | 0.0164  | 1.20124065  | 0.32488 | EPHA7    | EPH receptor A7                                                             |
| 0.521594297 | 0.01222 | 0.860352631 | 0.18341 | EPHB6    | EPH receptor B6                                                             |
| 0.658839976 | 0.00709 | 0.886996305 | 0.14367 | EPN2     | epsin 2                                                                     |
| 1.500337985 | 0.00232 | 1.05750964  | 0.27443 | EPO      | erythropoietin                                                              |
| 1.420107359 | 0.00971 | 1.130658649 | 0.15995 | ERAP1    | endoplasmic reticulum aminopeptidase 1                                      |
| 1.208803421 | 0.01295 | 1.033123308 | 0.15998 | ERAP2    | endoplasmic reticulum aminopeptidase 2                                      |
| 1.607701981 | 0.00086 | 1.147902414 | 0.12045 | ERGIC1   | endoplasmic reticulum-golgi intermediate compartment (ERGIC) 1              |
| 1.551861709 | 0.00658 | 1.198309021 | 0.11407 | ERN1     | endoplasmic reticulum to nucleus signaling 1                                |
| 1.284315809 | 0.02182 | 1.025267238 | 0.58106 | ESR2     | estrogen receptor 2 (ER beta)                                               |
| 1.197478705 | 0.0398  | 0.957271458 | 0.24679 | ESRRG    | estrogen-related receptor gamma                                             |
| 0.686342216 | 0.0477  | 0.903752727 | 0.50098 | ETS2     | v-ets erythroblastosis virus E26 oncogene homolog 2 (avian)                 |
| 1.232852325 | 0.03116 | 0.99231251  | 0.96399 | ETV1     | ets variant 1                                                               |
| 0.747424624 | 0.02304 | 1.00765376  | 0.87525 | EXOCC4   | exocyst complex component 4                                                 |
| 0.436483796 | 0.00253 | 0.851453708 | 0.28422 | EXOCC6B  | exocyst complex component 6B                                                |
| 1.327765158 | 0.00423 | 1.152686347 | 0.0883  | EXOQ     | endo/exonuclease (5'-3'), endonuclease G-like                               |
| 1.223488041 | 0.02017 | 1.065108203 | 0.36664 | EZH1     | enhancer of zeste homolog 1 (Drosophila)                                    |
| 0.532923368 | 0.03267 | 0.807201075 | 0.05041 | EZR      | ezrin                                                                       |
| 1.214194884 | 0.03705 | 1.032398535 | 0.44553 | F2RL2    | coagulation factor II (thrombin) receptor-like 2                            |
| 1.376495602 | 0.00445 | 1.102669163 | 0.10544 | F5       | coagulation factor V (proaccelerin, labile factor)                          |
| 1.634670657 | 0.01671 | 1.108800644 | 0.32944 | FAM101B  | family with sequence similarity 101, member B                               |
| 0.683020128 | 0.03193 | 0.839149637 | 0.27858 | FAM108B1 | family with sequence similarity 108, member B1                              |
| 0.73566672  | 0.02767 | 0.891328519 | 0.28082 | FAM115C  | family with sequence similarity 115, member C                               |
| 1.257013375 | 0.02621 | 1.086734863 | 0.1558  | FAM118A  | family with sequence similarity 118, member A                               |
| 1.20163605  | 0.03815 | 1.123499903 | 0.07598 | FAM120AC | family with sequence similarity 120A opposite strand                        |
| 1.316766922 | 0.03597 | 1.140763716 | 0.05912 | FAM123A  | family with sequence similarity 123A                                        |
| 1.268391399 | 0.01791 | 1.136209265 | 0.05228 | FAM123A  | family with sequence similarity 123A                                        |
| 1.196648963 | 0.04317 | 1.051172909 | 0.48196 | FAM123B  | family with sequence similarity 123B                                        |
| 0.731403162 | 0.0298  | 1.134154545 | 0.05671 | FAM129C  | family with sequence similarity 129, member C                               |
| 0.671286251 | 0.00032 | 0.911033166 | 0.15752 | FAM134B  | family with sequence similarity 134, member B                               |
| 1.247465572 | 0.01197 | 1.105730653 | 0.10656 | FAM149A  | family with sequence similarity 149, member A                               |
| 1.28788163  | 0.01604 | 1.131314463 | 0.09198 | FAM149A  | family with sequence similarity 149, member A                               |
| 1.303147149 | 0.02753 | 1.121166078 | 0.05837 | FAM176A  | family with sequence similarity 176, member A                               |
| 0.82587665  | 0.04999 | 1.042465761 | 0.34852 | FAM192A  | family with sequence similarity 192, member A                               |
| 1.20664392  | 0.04458 | 1.132833885 | 0.07781 | FAM199Y  | family with sequence similarity 199, X-linked                               |
| 1.284315809 | 0.01315 | 1.029540083 | 0.74964 | FAM19A2  | family with sequence similarity 19 (chemokine (C-C motif)-like), member A2  |
| 1.719512972 | 0.02278 | 1.116512962 | 0.20338 | FAM20A   | family with sequence similarity 20, member A                                |
| 1.22010051  | 0.04332 | 1.092777739 | 0.06486 | FAM22B   | family with sequence similarity 22, member B                                |
| 1.212512819 | 0.04851 | 1.083725967 | 0.30338 | FAM22F   | family with sequence similarity 22, member F                                |
| 1.150909352 | 0.02814 | 1.038139271 | 0.48185 | FAM26E   | family with sequence similarity 26, member E                                |
| 1.815038311 | 0.01801 | 1.058484395 | 0.59332 | FAM26F   | family with sequence similarity 26, member F                                |
| 1.633537982 | 0.01153 | 1.108032348 | 0.32821 | FAM26F   | family with sequence similarity 26, member F                                |
| 1.689972769 | 0.0132  | 1.000693387 | 0.99282 | FAM26F   | family with sequence similarity 26, member F                                |
| 1.268391399 | 0.03383 | 0.995849753 | 0.89306 | FAM49B   | family with sequence similarity 49, member B                                |
| 1.346300669 | 0.03117 | 1.051423309 | 0.24779 | FAM50B   | family with sequence similarity 50, member B                                |
| 2.337554497 | 0.00038 | 1.229438867 | 0.07451 | FAM55C   | family with sequence similarity 55, member C                                |
| 1.416175438 | 0.01416 | 1.202469249 | 0.06831 | FAM69B   | family with sequence similarity 69, member B                                |
| 1.219255094 | 0.03048 | 1.100378609 | 0.18679 | FAM69C   | family with sequence similarity 69, member C                                |
| 1.226884977 | 0.04785 | 1.028826708 | 0.51846 | FAM75D1  | family with sequence similarity 75, member D1                               |
| 1.30224419  | 0.01654 | 0.98079904  | 0.75339 | FAM82A1  | family with sequence similarity 82, member A1                               |
| 0.731403162 | 0.01565 | 0.923275771 | 0.13026 | FAR2     | family with sequence similarity 85, member F                                |
| 0.756808396 | 0.03186 | 0.91038824  | 0.45763 | FAM84A   | family with sequence similarity 84, member A                                |
| 1.383190629 | 0.02937 | 1.021720083 | 0.74899 | FAM96A   | family with sequence similarity 96, member A                                |
| 1.179356592 | 0.04131 | 0.961260928 | 0.35047 | FANCC    | Fanconi anemia, complementation group C                                     |
| 0.83931044  | 0.04166 | 0.94848315  | 0.23135 | FANCI    | Fanconi anemia, complementation group I                                     |
| 0.427014506 | 0.02119 | 1.049484948 | 0.13026 | FAR2     | fatty acyl CoA reductase 2                                                  |
| 0.690158677 | 0.03889 | 0.931740429 | 0.20158 | FAR5B    | phenylalanyl-tRNA synthetase, beta subunit                                  |
| 0.819036698 | 0.03843 | 0.89564567  | 0.0747  | FAU      | Finkel-Biskis-Reilly murine sarcoma virus (FBR-MuSV) ubiquitously expressed |
| 1.22010051  | 0.02    | 1.048989328 | 0.40197 | FBN3     | fibrillin 3                                                                 |
| 0.82587665  | 0.02439 | 0.91383145  | 0.10212 | FBXO22   | F-box protein 22                                                            |
| 0.665725807 | 0.02431 | 0.86934456  | 0.28211 | FBXO28   | F-box protein 28                                                            |
| 1.215936792 | 0.01101 | 1.022428531 | 0.65697 | FBXO40   | F-box protein 40                                                            |
| 1.172022284 | 0.04992 | 1.068065408 | 0.13909 | FBXO41   | F-box protein 41                                                            |
| 0.806082831 | 0.01385 | 0.933679945 | 0.13204 | FBXO42   | F-box protein 42                                                            |
| 0.824162085 | 0.04833 | 1.002776436 | 0.95865 | FBXO42   | F-box protein 42                                                            |
| 1.463071221 | 0.00178 | 1.068805991 | 0.2501  | FBXO6    | F-box protein 6                                                             |
| 0.76630998  | 0.02207 | 0.981388183 | 0.20644 | FBXW12   | F-box and WD repeat domain containing 12                                    |
| 1.225185332 | 0.02943 | 1.039579435 | 0.2724  | FCAR     | Fc fragment of IgA, receptor for                                            |
| 0.67877249  | 0.00797 | 0.934975198 | 0.52286 | FCGBP    | Fc fragment of IgG binding protein                                          |
| 0.616853585 | 0.0128  | 0.939522749 | 0.4746  | FCHSD1   | FCH and double SH3 domains 1                                                |
| 1.229438867 | 0.01006 | 1.132098902 | 0.11512 | FCRL1    | Fc receptor-like 1                                                          |
| 1.313121125 | 0.0217  | 1.101905116 | 0.1211  | FCRL1    | Fc receptor-like 1                                                          |
| 1.208317843 | 0.03527 | 1.092777739 |         |          |                                                                             |

|             |         |              |         |          |                                                                                                          |
|-------------|---------|--------------|---------|----------|----------------------------------------------------------------------------------------------------------|
| 1.191682575 | 0.04931 | 1.082975046  | 0.08258 | FCRL2    | Fc receptor-like 2                                                                                       |
| 0.735093668 | 0.01732 | 0.905633983  | 0.18117 | FDXR     | ferredoxin reductase                                                                                     |
| 0.831622098 | 0.04475 | 0.888226796  | 0.08    | FEM1A    | fem-1 homolog a (C. elegans)                                                                             |
| 0.635515845 | 0.01689 | 0.950659101  | 0.59943 | FER      | fer (fps/fer related) tyrosine kinase                                                                    |
| 0.790041312 | 0.02041 | 0.916388845  | 0.24318 | FERM1T1  | fermitin family member 1                                                                                 |
| 1.690369998 | 0.01084 | 0.970388098  | 0.38653 | FGD1     | FYVE, RhoGEF and PH domain containing 2                                                                  |
| 0.627201102 | 0.04044 | 0.925304428  | 0.58633 | FGD6     | FYVE, RhoGEF and PH domain containing 6                                                                  |
| 1.264879542 | 0.00745 | 0.999307093  | 0.98583 | FGF14    | fibroblast growth factor 14                                                                              |
| 0.684441907 | 0.01365 | 0.880259014  | 0.38893 | FGFR2    | fibroblast growth factor receptor 2                                                                      |
| 0.739181216 | 0.02069 | 0.915099188  | 0.13468 | FHL2     | four and a half LIM domains 2                                                                            |
| 0.770037174 | 0.01344 | 0.931551994  | 0.09174 | FHGA     | FH4 homolog, SAC1 lipid phosphatase domain containing (S. cerevisiae)                                    |
| 0.622437118 | 0.04341 | 0.936272247  | 0.63764 | FKBP5    | FK506 binding protein 5                                                                                  |
| 1.192508872 | 0.04269 | 1.010451446  | 0.83744 | FKBP     | fukutin related protein 5                                                                                |
| 0.298747801 | 0.01083 | 0.551334582  | 0.05571 | FLG      | filaggrin                                                                                                |
| 1.172834949 | 0.04028 | 1.044635763  | 0.35546 | FLJ35390 | hypothetical LOC255031                                                                                   |
| 1.193357473 | 0.02399 | 1.002081605  | 0.96484 | FLJ1350  | hypothetical LOC399806                                                                                   |
| 0.655834621 | 0.00499 | 0.903752727  | 0.05072 | FLN1     | filamin b, beta                                                                                          |
| 1.443920196 | 0.00734 | 1.240567298  | 0.08709 | FLT1     | fms-related tyrosine kinase 1 (vascular endothelial growth factor/vascular permeability factor receptor) |
| 0.772175133 | 0.02269 | 0.905633983  | 0.19809 | FLVCR2   | feline leukemia virus subgroup C cellular receptor family, member 2                                      |
| 0.817335328 | 0.02669 | 0.954621014  | 0.67796 | FLVCR2   | feline leukemia virus subgroup C cellular receptor family, member 2                                      |
| 1.492778383 | 0.00344 | 1.215067972  | 0.11604 | FMO3     | flavin containing monooxygenase 3                                                                        |
| 1.746557241 | 0.02218 | 1.252646439  | 0.17866 | FMO3     | flavin containing monooxygenase 3                                                                        |
| 1.50733491  | 0.01929 | 1.083725967  | 0.15583 | FND3C3B  | fibronectin type III domain containing 3B                                                                |
| 0.788400174 | 0.02325 | 0.955282936  | 0.61214 | FNIP2    | folliculin interacting protein 2                                                                         |
| 0.66342257  | 0.00883 | 0.865736566  | 0.1363  | FNTB     | farnesyltransferase, CAAX box, beta                                                                      |
| 4.293041146 | 0.00022 | 1.56049096   | 0.11185 | FOS      | FBJ murine osteosarcoma viral oncogene homolog                                                           |
| 2.040693118 | 0.03332 | 1.170389841  | 0.62293 | FOSB     | FBJ murine osteosarcoma viral oncogene homolog B                                                         |
| 1.370782885 | 0.0209  | 1.172022284  | 0.0531  | FOX2     | forkhead box C2 (MFX-1, mesenchyme forkhead 1)                                                           |
| 1.753211443 | 0.00645 | 1.210833084  | 0.09568 | FOXF1    | forkhead box F1                                                                                          |
| 0.879039561 | 0.04656 | 0.980779004  | 0.68787 | FOX2     | forkhead box P2                                                                                          |
| 0.743806881 | 0.04178 | 1.079228237  | 0.30287 | FRMPD1   | FERM and PDZ domain containing 1                                                                         |
| 1.501079098 | 0.01233 | 1.157490217  | 0.1404  | FRZ8     | frizzled-related protein                                                                                 |
| 1.373836233 | 0.00216 | 1.087054644  | 0.22725 | FTX      | FTX transcript, MST regulator (non-protein coding)                                                       |
| 0.716977624 | 0.02999 | 0.8362464    | 0.06564 | FUT2     | fucosyltransferase 2 (secretor status included)                                                          |
| 1.395710764 | 0.01605 | 1.091688319  | 0.57203 | FUT4     | fucosyltransferase 4 (alpha (1,3) fucosyltransferase, myeloid-specific)                                  |
| 1.22436392  | 0.03376 | 1.102669163  | 0.06928 | FXR2     | fragile X mental retardation, autosomal homolog 2                                                        |
| 0.75345233  | 0.0424  | 0.991029563  | 0.8751  | FXYD3    | FXYD domain containing ion transport regulator 3                                                         |
| 0.71448707  | 0.01449 | 0.98328594   | 0.6231  | FXYD3    | FXYD domain containing ion transport regulator 3                                                         |
| 1.265756594 | 0.0305  | 1.074004472  | 0.23794 | FXYD7    | FXYD domain containing ion transport regulator 7                                                         |
| 1.41175397  | 0.00622 | 1.127400412  | 0.17867 | FYB      | FYN binding protein                                                                                      |
| 1.578987773 | 0.04051 | 1.249196126  | 0.07189 | FYN      | FYN oncogene related to SRC, FGR, YES                                                                    |
| 1.185914499 | 0.02449 | 1.111108729  | 0.09944 | FZD4     | frizzled family receptor 4                                                                               |
| 0.70961678  | 0.04081 | 0.839149637  | 0.18303 | GAB1     | GRB2-associated binding protein 1                                                                        |
| 1.20163605  | 0.03509 | 1.030232954  | 0.75128 | GABR1    | GABA binding protein transcription factor, beta subunit 1                                                |
| 0.752833773 | 0.04885 | 1.018801197  | 0.76869 | GABRP2   | GABA binding protein transcription factor, beta subunit 2                                                |
| 1.256142381 | 0.03855 | 1.016774673  | 0.72302 | GABRR2   | gamma-aminobutyric acid (GABA) receptor, rho 2                                                           |
| 1.383190629 | 0.01573 | 1.232852325  | 0.15783 | GADD45B  | growth arrest and DNA-damage-inducible, beta                                                             |
| 0.746389192 | 0.00552 | 0.915733686  | 0.21741 | GAPVD1   | GTPase activating protein and VPS9 domains 1                                                             |
| 0.792234811 | 0.01202 | 0.965936229  | 0.5464  | GARPL3   | GTPase activating Rap/Ran/GAP domain-like 3                                                              |
| 1.692074858 | 0.02838 | 1.172324949  | 0.85859 | GAS5     | growth arrest-specific 5 (non-protein coding)                                                            |
| 0.69688619  | 0.03    | 0.994470169  | 0.90094 | GAS5     | growth arrest-specific 5 (non-protein coding)                                                            |
| 1.640345822 | 0.00821 | 1.221793102  | 0.05544 | GATA3    | GATA binding protein 3                                                                                   |
| 1.625631204 | 0.01209 | 1.135242102  | 0.05185 | GBP5     | guanylate binding protein 5                                                                              |
| 1.787570325 | 0.04462 | 1.126619228  | 0.11176 | GBP5     | guanylate binding protein 5                                                                              |
| 1.775222575 | 0.00501 | 0.980965408  | 0.54843 | GCLM     | glutamate-cysteine ligase, modifier subunit                                                              |
| 1.894740141 | 0.04715 | 1.133669413  | 0.34464 | GCLM     | glutamate-cysteine ligase, modifier subunit                                                              |
| 1.185914499 | 0.02641 | 1.001387256  | 0.97745 | GCNT1    | glucosaminyl (N-acetyl) transferase 1, core 2                                                            |
| 0.630888704 | 0.00088 | 0.987600861  | 0.87058 | GDA      | guanine deaminase                                                                                        |
| 1.382232207 | 0.01569 | 1.083725967  | 0.10998 | GDF11    | growth differentiation factor 11                                                                         |
| 0.66669338  | 0.0309  | 0.928235977  | 0.27825 | GDI1     | glycero-phosphodiester phosphodiesterase domain containing 2                                             |
| 0.628491649 | 0.01035 | 0.84264683   | 0.07268 | GDPD3    | glycero-phosphodiester phosphodiesterase domain containing 3                                             |
| 1.923854909 | 0.00185 | 1.071030823  | 0.65361 | GEM      | GTP binding protein overexpressed in skeletal muscle                                                     |
| 0.715984371 | 0.00873 | 0.991716731  | 0.87066 | GEMIN8   | gem (nuclear organelle) associated protein 8                                                             |
| 0.79536484  | 0.00503 | 0.933679945  | 0.24083 | GFOD1    | glucose-fructose oxidoreductase domain containing 1                                                      |
| 0.75262374  | 0.02003 | 0.828170661  | 0.05237 | GFOD2    | glucose-fructose oxidoreductase domain containing 2                                                      |
| 1.401527449 | 0.04047 | 1.172324949  | 0.8224  | GIMAP1   | GTPase, IMAP family member 1                                                                             |
| 2.093620564 | 0.00071 | 1.340712592  | 0.05936 | GIMAP2   | GTPase, IMAP family member 2                                                                             |
| 0.803850991 | 0.04303 | 0.934327347  | 0.35836 | GINS2    | GINS complex subunit 2 (Psf2 homolog)                                                                    |
| 0.775393206 | 0.04219 | 0.863938187  | 0.05418 | GINS3    | GINS complex subunit 3 (Psf3 homolog)                                                                    |
| 0.580754366 | 0.04511 | 0.854409741  | 0.08254 | GIB5     | gap junction protein, beta 5, 31.1kDa                                                                    |
| 1.418140036 | 0.01063 | 1.035325224  | 0.60653 | GID3     | gap junction protein, delta 3, 31.9kDa                                                                   |
| 1.487613762 | 0.00312 | 1.236275261  | 0.1963  | GLP1R1   | GLI pathogenesis-related 1                                                                               |
| 1.356604327 | 0.03241 | 1.130530567  | 0.24757 | GLP1R1   | GLI pathogenesis-related 1                                                                               |
| 1.436940177 | 0.03108 | 1.079228237  | 0.57672 | GLP1R1   | GLI pathogenesis-related 1                                                                               |
| 1.566994374 | 0.03658 | 1.32592576   | 0.05737 | GLP1R2   | GLI pathogenesis-related 2                                                                               |
| 1.55293775  | 0.0036  | 1.06470182   | 0.41145 | GLS3     | GLIS family zinc finger 3                                                                                |
| 0.763658749 | 0.01144 | 0.949096246  | 0.43443 | GLD4     | glyoxalase domain containing 4                                                                           |
| 1.303147149 | 0.01298 | 1.106497353  | 0.10973 | GLTD1    | glycosyltransferase 1 domain containing 1                                                                |
| 0.77546036  | 0.02671 | 0.827596816  | 0.11005 | GLUD1    | glutamate dehydrogenase 1                                                                                |
| 0.61127303  | 0.01367 | 0.89564567   | 0.28469 | GLUD1    | glutamate dehydrogenase 1                                                                                |
| 0.804966138 | 0.03906 | 0.94607647   | 0.34923 | GM2A     | GM2 ganglioside activator                                                                                |
| 1.216723359 | 0.02009 | 1.114121818  | 0.07656 | GMBL1    | guanine nucleotide binding protein (G protein), beta polypeptide 1-like                                  |
| 0.710546022 | 0.03921 | 0.921464186  | 0.29998 | GMBL1    | guanine nucleotide binding protein (G protein), beta polypeptide 2-like 1                                |
| 0.511214265 | 0.00841 | 1.047019899  | 0.05591 | GNG12    | guanine nucleotide binding protein (G protein), gamma 12                                                 |
| 0.601651513 | 0.00281 | 0.863938187  | 0.07627 | GNG12    | guanine nucleotide binding protein (G protein), gamma 12                                                 |
| 1.681792831 | 0.02547 | 1.241427492  | 0.10175 | GNG2     | guanine nucleotide binding protein (G protein), gamma 2                                                  |
| 1.373682623 | 0.00659 | 0.993781093  | 0.96484 | GNS      | glucosaminyl (N-acetyl)-S-sulfatase                                                                      |
| 1.221793102 | 0.0453  | 1.013234569  | 0.7676  | GORASP2  | golgi reassembly stacking protein 2, 55kDa                                                               |
| 1.385104648 | 0.04034 | 1.067325338  | 0.30877 | GORASP2  | golgi reassembly stacking protein 2, 55kDa                                                               |
| 0.770037174 | 0.04036 | 0.860949188  | 0.05032 | GPATCH1  | G patch domain containing 1                                                                              |
| 0.578344092 | 0.00135 | 0.885153765  | 0.09293 | GNPMB    | glycoprotein (transmembrane) nmb                                                                         |
| 1.404444876 | 0.04093 | 1.07549439   | 0.32606 | GNP110   | G protein-coupled receptor 110                                                                           |
| 1.62788837  | 0.01365 | 1.251796459  | 0.10203 | GNP171   | G protein-coupled receptor 171                                                                           |
| 1.479387509 | 0.01322 | 1.030253954  | 0.7982  | GNP18    | G protein-coupled receptor 18                                                                            |
| 1.183451022 | 0.02315 | 1.076986376  | 0.17394 | GNP32    | G protein-coupled receptor 32                                                                            |
| 2.04204251  | 0.00982 | 1.400556321  | 0.05056 | GNP34    | G protein-coupled receptor 34                                                                            |
| 1.209994089 | 0.04265 | 1.051901779  | 0.21083 | GNP45    | G protein-coupled receptor 45                                                                            |
| 1.387030969 | 0.0194  | 1.055557318  | 0.32075 | GNP64    | G protein-coupled receptor 64                                                                            |
| 1.261377409 | 0.03912 | 1.076986376  | 0.30971 | GNP68    | G protein-coupled receptor 68                                                                            |
| 0.802737389 | 0.0367  | 0.984866443  | 0.78552 | GNP78    | G protein-coupled receptor 78                                                                            |
| 1.331451613 | 0.01506 | 1.060687741  | 0.20045 | GNP84    | G protein-coupled receptor 84                                                                            |
| 1.348167732 | 0.00972 | 1.033114388  | 0.58296 | GNP1N3   | GPRIN family member 3                                                                                    |
| 0.510382688 | 0.00103 | 0.883419551  | 0.40303 | GPX2     | glutathione peroxidase 2 (gastrintestinal)                                                               |
| 0.705637922 | 0.01438 | 0.980482328  | 0.07657 | GRAMD3   | GRAM domain containing 3                                                                                 |
| 0.731028724 | 0.01583 | 0.946057647  | 0.41586 | GRB7     | growth factor receptor-bound protein 7                                                                   |
| 1.29056249  | 0.03125 | 1.010451446  | 0.8968  | GRK5     | G protein-coupled receptor kinase 5                                                                      |
| 1.219255094 | 0.01945 | 1.107264584  | 0.17957 | GSDMB    | gasdermin B                                                                                              |
| 1.236275261 | 0.03345 | 1.053361036  | 0.39752 | GSK3A    | glycogen synthase kinase 3 alpha                                                                         |
| 1.18838105  | 0.0365  | 1.064370182  | 0.23176 | GSK3B    | glycogen synthase kinase 3 beta                                                                          |
| 0.673619788 | 0.01215 | 0.891040755  | 0.19219 | GSP1T    | G1 to S phase transition 1                                                                               |
| 1.304954948 | 0.0109  | 1.025078145  | 0.70742 | GSR      | glutathione reductase                                                                                    |
| 0.801625329 | 0.03411 | 0.954621014  | 0.55109 | GSTM3    | glutathione S-transferase mu 3 (brain)                                                                   |
| 0.703884188 | 0.00626 | 0.910669834  | 0.06426 | GTF3C1   | general transcription factor IIIC, polypeptide 1, alpha 220kDa                                           |
| 1.187599666 | 0.03782 | 1.054822317  | 0.32514 | GTPBP3   | GTP binding protein 3 (mitochondrial)                                                                    |
| 1.227355884 | 0.01232 | 1.048262476  | 0.5862  | GTPBP5   | GTP binding protein 5 (putative)                                                                         |
| 0.405563578 | 0.02685 | 1.041021598  | 0.90077 | H19      | H19, imprinted maternally expressed transcript (non-protein coding)                                      |
| 0.45966583  | 0.00715 | 0.934327347  | 0.78768 | H19      | H19, imprinted maternally expressed transcript (non-protein coding)                                      |
| 0.784584098 | 0.04571 | 0.963261894  | 0.41126 | HARS2    | histidyl-tRNA synthetase 2, mitochondrial (putative)                                                     |
| 1.818816504 | 0.04882 | 1.350974085  | 0.07656 | HAS2     | hyaluronan synthase 2                                                                                    |
| 1.305859787 | 0.02029 | 1.050446544  | 0.31575 | HAUS5    | HAUS augmin-like complex, subunit 5                                                                      |
| 0.833931044 | 0.04266 | 0.924663278  | 0.10882 | HBP1     | hepatitis B virus x interacting protein                                                                  |
| 0.752623374 | 0.01927 | 0.937571096  | 0.3158  | HBP1     | hepatitis B virus x interacting protein                                                                  |
| 1.186736798 | 0.04537 | 1.048989328  | 0.39228 | HCG9     | HLA complex group 9 (non-protein coding)                                                                 |
| 0.815072332 | 0.02842 | 0.995159722  | 0.94981 | HDAC10   | histone deacetylase 10                                                                                   |
| 0.775930854 | 0.01227 | 0.93109482   | 0.29246 | HDAC8    | histone deacetylase 8                                                                                    |
| 0.811127156 | 0.0456  | 1.087488391  | 0.16522 | HDAC9    | histone deacetylase 9                                                                                    |
| 0.785128119 | 0.04362 | 0.878430468  | 0.07138 | HEATR2   | HEAT repeat containing 2                                                                                 |
| 1.348167732 | 0.02865 | 1.083725967  | 0.25834 | HEG1     | HEG homolog 1 (zebrafish)                                                                                |
| 1.247465572 | 0.0144  | 1.006955555  | 0.90038 | HERC2P7  | hct domain and RLD 2 pseudogene 7                                                                        |
| 0.684916449 | 0.04916 | 0.821880387  | 0.09606 | HERC4    | hct domain and RLD 4                                                                                     |
| 1.511519928 | 0.01235 | 1.0392979325 | 0.66253 | HERC5    | hct domain and RLD 5                                                                                     |
| 1.340712592 | 0.00904 | 1.034547582  | 0.68083 | HEXIM2   | hexamethylene bis-acetamide inducible 2                                                                  |
| 1.604362333 | 0.04552 | 1.101141598  | 0.4794  | HGF      | hepatocyte growth factor (hepapoietin A; scatter factor)                                                 |
| 1.263127262 | 0.02893 | 1.182631     | 0.06668 | HHLA3    | HERV-H LTR-associating 3                                                                                 |
| 0.793333843 | 0.02809 | 0.923382311  | 0.27518 | HHP1R    | huntingtin interacting protein 1 related                                                                 |
| 0.69018677  | 0.0085  | 0.918276162  | 0.38097 | HIST2BBE | histone cluster 2, H2be                                                                                  |
| 1.17772279  | 0.03079 | 1.06723328   | 0.15522 | HJCP2    | hmr/ histocompatibility complex, class II, DP beta 2 (pseudogene)                                        |
| 1.342572503 | 0.03367 | 0.999307093  | 0.99339 | HMG20A   | high mobility group 20A                                                                                  |
| 0.822450069 | 0.04651 | 0.950659101  | 0.31813 | HMG2A    | high mobility group AT-hook 2                                                                            |
| 1.286097483 | 0.02407 | 1.081474763  | 0.06365 | HNF4A    | hepatocyte nuclear factor 4, alpha                                                                       |
| 0.734075318 | 0.01728 | 0.904379378  | 0.1743  | HNRNP1A1 | heterogeneous nuclear ribonucleoprotein A1                                                               |
| 0.755759964 | 0.01936 | 0.972658947  | 0.57644 | HNRNPJ   | heterogeneous nuclear ribonucleoprotein U (scaffold attachment factor A)                                 |
| 0.81056512  | 0.04576 | 0.89564567   | 0.16398 | HNRNPUL2 | heterogeneous nuclear ribonucleoprotein U-like 2                                                         |
| 1.354724977 | 0.03406 | 1.118837101  | 0.07043 | HOMX1    | homeobox A1                                                                                              |
| 1.4063932   | 0.0039  | 1.155886707  | 0.08159 | HOXB4    | homeobox B4                                                                                              |
| 1.386069886 | 0.02094 | 1.085229372  | 0.2201  | HOXD1    | homeobox D1                                                                                              |
| 1.271913007 | 0.03332 | 0.961927455  | 0.46864 | HPS1     | Hermansky-Pudlak syndrome 1                                                                              |
| 0.729004689 | 0.03096 | 0.88696305   | 0.29617 | HR       | hairless homolog (mouse)                                                                                 |

|             |         |             |         |           |                                                                          |
|-------------|---------|-------------|---------|-----------|--------------------------------------------------------------------------|
| 1.266634254 | 0.03445 | 1.104198847 | 0.11155 | HRASL52   | HRAS-like suppressor 2                                                   |
| 1.205807828 | 0.02554 | 1.107264584 | 0.11796 | HRC       | histidine rich calcium binding protein                                   |
| 1.173648178 | 0.04281 | 1.090507733 | 0.16109 | HRH3      | histamine receptor H3                                                    |
| 1.467133344 | 0.04738 | 0.809442217 | 0.24779 | HS3T1     | heparan sulfate (glucosamine) 3-O-sulfotransferase 1                     |
| 0.759896246 | 0.00085 | 0.816203946 | 0.05564 | HSBP1     | heat shock factor binding protein 1                                      |
| 0.743291492 | 0.03575 | 0.91066534  | 0.13768 | HSO17B7   | 5-hydroxytryptamine (serotonin) receptor 7                               |
| 1.271913007 | 0.00463 | 1.085229372 | 0.252   | HSPA1L    | heat shock 70kDa protein 1-like                                          |
| 0.57077354  | 0.04387 | 0.841479482 | 0.09223 | HSPA9     | heat shock 70kDa protein 9 (mortalin)                                    |
| 1.204137381 | 0.035   | 1.064370182 | 0.2885  | HSPC081   | hypothetical LOC100286989                                                |
| 0.46396738  | 0.00007 | 0.807201075 | 0.26583 | HTR3A     | 5-hydroxytryptamine (serotonin) receptor 3A                              |
| 0.515199268 | 0.00256 | 0.860880374 | 0.04682 | HTR3B     | 5-hydroxytryptamine (serotonin) receptor 3B                              |
| 0.673616788 | 0.03858 | 0.929160674 | 0.2988  | HYAL1     | hyaluronoglucosaminidase 1                                               |
| 0.666187413 | 0.01352 | 0.907519155 | 0.36367 | IDE       | insulin-degrading enzyme                                                 |
| 0.635956503 | 0.01592 | 0.844986384 | 0.10278 | IDE       | insulin-degrading enzyme                                                 |
| 1.608816742 | 0.03066 | 1.113421618 | 0.29647 | IDO1      | indoleamine 2,3-dioxygenase 1                                            |
| 0.803293997 | 0.02803 | 0.886381699 | 0.05859 | IFITM10   | interferon induced transmembrane protein 10                              |
| 1.346300659 | 0.00563 | 1.111879158 | 0.3272  | IFNAR2    | interferon (alpha, beta and omega) receptor 2                            |
| 1.337000495 | 0.00614 | 1.014662547 | 0.77502 | IFNG      | interferon, gamma                                                        |
| 1.540074348 | 0.02225 | 1.152686347 | 0.30674 | IGF1      | insulin-like growth factor 1 (somatomedin C)                             |
| 0.527411159 | 0.00025 | 0.828744904 | 0.07664 | IGFBP3    | insulin-like growth factor binding protein 3                             |
| 1.204972315 | 0.04949 | 1.061425209 | 0.13144 | IGH@      | immunoglobulin heavy locus                                               |
| 1.212512819 | 0.01764 | 1.071030823 | 0.20861 | IGHG1     | immunoglobulin heavy constant gamma 1 (G1m marker)                       |
| 1.295042999 | 0.03415 | 1.252664439 | 0.06392 | IGHG1     | immunoglobulin heavy constant gamma 1 (G1m marker)                       |
| 1.167158102 | 0.0339  | 1.030253954 | 0.448   | IGHG1     | immunoglobulin heavy constant gamma 1 (G1m marker)                       |
| 1.203303026 | 0.02024 | 1.083725967 | 0.27913 | IGK@      | immunoglobulin kappa locus                                               |
| 0.64769531  | 0.01088 | 0.792234811 | 0.07407 | IL13RA1   | interleukin 13 receptor, alpha 1                                         |
| 1.48246701  | 0.0316  | 1.108323248 | 0.20045 | IL15      | interleukin 15                                                           |
| 1.483494934 | 0.0015  | 1.152868347 | 0.06517 | IL15RA    | interleukin 15 receptor, alpha                                           |
| 1.295042999 | 0.02077 | 1.020304659 | 0.68836 | IL17A     | interleukin 17A                                                          |
| 0.718470088 | 0.0043  | 0.961927455 | 0.4807  | IL17B     | interleukin 17B                                                          |
| 0.952063522 | 0.00989 | 1.38991822  | 0.14716 | IL1A      | interleukin 1, alpha                                                     |
| 1.788690032 | 0.01121 | 1.004167543 | 0.9542  | IL1F10    | interleukin 1 family, member 10 (theta)                                  |
| 1.541142217 | 0.02963 | 1.05533718  | 0.65511 | IL13      | interleukin 13                                                           |
| 1.292352831 | 0.02928 | 1.178539408 | 0.06351 | IL13RA    | interleukin 13 receptor, alpha (low affinity)                            |
| 1.689972769 | 0.00121 | 1.104198847 | 0.16791 | IL5RA     | interleukin 5 receptor, alpha                                            |
| 0.758180306 | 0.00525 | 1.677136369 | 0.05461 | IL8       | interleukin 8                                                            |
| 0.62546454  | 0.01904 | 0.871154192 | 0.08472 | IMP3      | IMP3, U3 small nucleolar ribonucleoprotein, homolog (yeast)              |
| 0.844986384 | 0.00374 | 1.02030823  | 0.16812 | ING2      | inhibitor of growth factor, member 2                                     |
| 1.20163605  | 0.0374  | 0.971307496 | 0.63561 | INHA      | inhibin, alpha                                                           |
| 1.262252032 | 0.03764 | 1.159899655 | 0.0607  | INPP5D    | inositol polyphosphate-5-phosphatase, 145kDa                             |
| 0.652477474 | 0.04123 | 0.868742185 | 0.16196 | INPP5F    | inositol polyphosphate-5-phosphatase F                                   |
| 1.271913007 | 0.04659 | 1.025978145 | 0.72589 | INSIG1    | insulin induced gene 1                                                   |
| 1.442928687 | 0.02731 | 0.862143545 | 0.1311  | INSIG1    | insulin induced gene 1                                                   |
| 1.494840249 | 0.00535 | 1.212123919 | 0.02663 | INSR      | insulin receptor                                                         |
| 0.531447837 | 0.00186 | 0.98009415  | 0.76108 | IPK2      | inositol hexakisphosphate kinase 2                                       |
| 1.329607108 | 0.03396 | 1.05553718  | 0.46651 | IQCB1     | IQ motif containing B1                                                   |
| 1.376495602 | 0.04244 | 1.051172909 | 0.51608 | IQCB1     | IQ motif containing B1                                                   |
| 1.481439798 | 0.01245 | 1.00695555  | 0.95661 | IQGAP2    | IQ motif containing GTPase activating protein 2                          |
| 0.740719899 | 0.048   | 0.9854937   | 0.7267  | IRF5      | interferon regulatory factor 6                                           |
| 1.17022284  | 0.03538 | 0.988970945 | 0.86531 | IRSA      | insulin receptor substrate 4                                             |
| 1.844206236 | 0.00284 | 1.312211255 | 0.06802 | ITGA4     | integrin, alpha 4 (antigen CD49D, alpha 4 subunit of VLA-4 receptor)     |
| 1.308578071 | 0.01782 | 1.048262476 | 0.23734 | ITGA8     | integrin, alpha 8                                                        |
| 0.819604608 | 0.03128 | 0.988970916 | 0.79876 | ITGB5     | integrin, beta 5                                                         |
| 1.66551542  | 0.00578 | 1.204972315 | 0.16258 | ITK       | IL2-inducible T-cell kinase                                              |
| 1.244011653 | 0.02183 | 0.961297455 | 0.6663  | ITPK1-AS1 | ITPK1 antisense RNA 1 (non-protein coding)                               |
| 0.713507253 | 0.02147 | 0.925946023 | 0.35946 | ITPR3     | inositol 1,4,5-trisphosphate receptor, type 3                            |
| 0.727490342 | 0.04647 | 0.922103118 | 0.10695 | ITPR3     | inositol 1,4,5-trisphosphate receptor, type 3                            |
| 0.796640096 | 0.01975 | 1.051099168 | 0.12974 | ITPRIP1   | inositol 1,4,5-trisphosphate receptor interacting protein-like 1         |
| 1.441928871 | 0.01344 | 1.116512962 | 0.42467 | JUN       | jun proto-oncogene                                                       |
| 1.540371348 | 0.01764 | 1.071030823 | 0.45613 | JUN       | jun proto-oncogene                                                       |
| 0.677832163 | 0.01831 | 1.001387256 | 0.97244 | KAT5A     | (klysine) acetyltransferase 6A                                           |
| 0.726482525 | 0.03038 | 0.936272247 | 0.27494 | KAT7      | (klysine) acetyltransferase 7                                            |
| 1.209155676 | 0.04341 | 1.092020546 | 0.09352 | KCNAB1    | potassium voltage-gated channel, shaker-related subfamily, beta member 1 |
| 1.212512819 | 0.04748 | 1.08224645  | 0.21457 | KCNK2     | potassium voltage-gated channel, Shaw-related subfamily, member 2        |
| 1.264003098 | 0.02727 | 1.043913927 | 0.57226 | KCNK3     | potassium voltage-gated channel, Shaw-related subfamily, member 3        |
| 1.212512819 | 0.04659 | 1.040300267 | 0.29588 | KCNK4     | potassium voltage-gated channel, Shaw-related subfamily, member 4        |
| 1.215036792 | 0.02088 | 1.108032348 | 0.221   | KCNK1     | potassium voltage-gated channel, Shal-related subfamily, member 1        |
| 1.203303026 | 0.0159  | 1.101905116 | 0.0692  | KCNK3     | potassium voltage-gated channel, Isk-related family, member 3            |
| 1.586667686 | 0.01767 | 1.188777249 | 0.05744 | KCNK4     | potassium voltage-gated channel, Isk-related family, member 4            |
| 1.229438867 | 0.02968 | 1.07997656  | 0.14271 | KCNK1     | potassium voltage-gated channel, subfamily G, member 1                   |
| 0.816203046 | 0.04172 | 0.891316096 | 0.05453 | KCNK1     | potassium voltage-gated channel, subfamily G, member 1                   |
| 1.190971382 | 0.04122 | 0.982139595 | 0.61023 | KCNIP4    | Kv channel interacting protein 4                                         |
| 1.264879542 | 0.00708 | 1.040300267 | 0.31392 | KCNJ10    | potassium inwardly-rectifying channel, subfamily J, member 10            |
| 0.81252396  | 0.01142 | 0.898755127 | 0.0521  | KCNJ12    | potassium inwardly-rectifying channel, subfamily J, member 12            |
| 0.724973416 | 0.0464  | 0.901875378 | 0.1827  | KCNJ15    | potassium inwardly-rectifying channel, subfamily J, member 15            |
| 1.275444392 | 0.04152 | 1.134455485 | 0.05453 | KCNK3     | potassium voltage-gated channel, KQT-like subfamily, member 3            |
| 0.823591017 | 0.04572 | 0.96154616  | 0.17188 | KCTD4     | potassium channel tetramerisation domain containing 4                    |
| 0.803293997 | 0.01814 | 0.959264119 | 0.45213 | KDMA5     | lysine (K)-specific demethylase 5A                                       |
| 0.683020128 | 0.01501 | 0.90312651  | 0.05485 | KDM5B     | lysine (K)-specific demethylase 5B                                       |
| 0.680783009 | 0.03935 | 0.796640096 | 0.09823 | KDMA6     | lysine (K)-specific demethylase 6A                                       |
| 1.250062303 | 0.01292 | 1.110338834 | 0.34913 | KHSRP     | KH-type splicing regulatory protein                                      |
| 1.310393404 | 0.01332 | 1.171210181 | 0.09436 | KIAA0226L | KIAA0226-like                                                            |
| 1.708819482 | 0.02717 | 1.285206337 | 0.0643  | KIAA0226L | KIAA0226-like                                                            |
| 0.792784137 | 0.02039 | 0.924022572 | 0.1917  | KIAA0430  | KIAA0430                                                                 |
| 1.203303026 | 0.04976 | 1.062895674 | 0.199   | KIAA0748  | KIAA0748                                                                 |
| 0.637280314 | 0.00216 | 0.866937564 | 0.09465 | KIAA0754  | KIAA0754                                                                 |
| 1.18759966  | 0.03497 | 1.068965408 | 0.25107 | KIAA1024  | KIAA1024                                                                 |
| 1.200803427 | 0.02938 | 1.06323673  | 0.1274  | KIAA1045  | KIAA1045                                                                 |
| 1.286097483 | 0.02986 | 0.968618189 | 0.50383 | KIAA1324  | KIAA1324                                                                 |
| 1.368883813 | 0.03154 | 0.944747041 | 0.64061 | KIAA1370  | KIAA1370                                                                 |
| 1.181811547 | 0.04528 | 1.033830736 | 0.4974  | KIAA1456  | KIAA1456                                                                 |
| 1.20664392  | 0.04379 | 1.028113827 | 0.59245 | KIAA1456  | KIAA1456                                                                 |
| 0.661127303 | 0.04509 | 0.902500727 | 0.33445 | KIAA2018  | KIAA2018                                                                 |
| 0.697855382 | 0.04698 | 0.852044095 | 0.11107 | KIF1B     | kinesin family member 1B                                                 |
| 0.64869383  | 0.01738 | 0.843815796 | 0.09158 | KIF1C     | kinesin family member 1C                                                 |
| 1.219255094 | 0.01655 | 1.037419937 | 0.56079 | KIF25-AS1 | KIF25 antisense RNA 1 (non-protein coding)                               |
| 1.220946513 | 0.04295 | 1.071030823 | 0.24047 | KIF5A     | kinesin family member 5A                                                 |
| 0.648023962 | 0.004   | 0.715393206 | 0.09321 | KIF5B     | kinesin family member 5B                                                 |
| 1.163925534 | 0.03983 | 0.97329374  | 0.63004 | KIF5C     | kinesin family member 5C                                                 |
| 0.717972255 | 0.0182  | 0.89688816  | 0.10581 | KIFAP3    | kinesin-associated protein 3                                             |
| 0.496202187 | 0.0202  | 1.002081605 | 0.98443 | KIFC2     | kinesin family member C2                                                 |
| 0.639492791 | 0.00621 | 0.89688816  | 0.12352 | KIFC2     | kinesin family member C2                                                 |
| 1.298638603 | 0.02168 | 1.101905116 | 0.09393 | KLF12     | Kruppel-like factor 12                                                   |
| 1.367935304 | 0.01749 | 1.132098002 | 0.14513 | KLF15     | Kruppel-like factor 15                                                   |
| 0.660662003 | 0.02865 | 0.999307093 | 0.95909 | KLF3      | Kruppel-like factor 3 (basic)                                            |
| 0.534032704 | 0.01389 | 0.669427628 | 0.08084 | KLF3      | Kruppel-like factor 3 (basic)                                            |
| 1.200803427 | 0.04393 | 1.0181852   | 0.81578 | KLF9      | Kruppel-like factor 9                                                    |
| 1.48452371  | 0.0482  | 1.063632673 | 0.587   | KLHDC1    | kelch domain containing 1                                                |
| 0.70222438  | 0.0238  | 0.939527949 | 0.4724  | KLHDC5    | kelch domain containing 5                                                |
| 1.37495402  | 0.00782 | 0.988285552 | 0.89846 | KLHDC8A   | kelch domain containing 8A                                               |
| 0.79774524  | 0.02437 | 1.056285625 | 0.51847 | KLHL12    | kelch-like 12 (Drosophila)                                               |
| 0.576742803 | 0.00096 | 0.790041312 | 0.06907 | KLHL18    | kelch-like 18 (Drosophila)                                               |
| 1.232852325 | 0.04617 | 0.998614666 | 0.97435 | KLHL26    | kelch-like 26 (Drosophila)                                               |
| 1.660940048 | 0.00001 | 1.220946513 | 0.05951 | KLHL6     | kelch-like 6 (Drosophila)                                                |
| 0.55825481  | 0.01043 | 0.89128519  | 0.38765 | KLK12     | kallikrein-related peptidase 12                                          |
| 0.633317127 | 0.00955 | 0.822450069 | 0.14662 | KLK12     | kallikrein-related peptidase 12                                          |
| 0.573951207 | 0.02155 | 0.868140228 | 0.30558 | KLK12     | kallikrein-related peptidase 12                                          |
| 0.55554364  | 0.00346 | 0.886996305 | 0.45083 | KLK14     | kallikrein-related peptidase 14                                          |
| 0.494828328 | 0.00995 | 0.753145233 | 0.07085 | KLK5      | kallikrein-related peptidase 5                                           |
| 0.346517471 | 0.00028 | 0.734075518 | 0.12377 | KLK7      | kallikrein-related peptidase 7                                           |
| 0.564482202 | 0.00904 | 0.8362464   | 0.14308 | KLK8      | kallikrein-related peptidase 8                                           |
| 0.598324482 | 0.00898 | 0.833931044 | 0.15439 | KLK8      | kallikrein-related peptidase 8                                           |
| 1.213335356 | 0.01618 | 1.020304659 | 0.6805  | KLLN      | killin, p53-regulated DNA replication inhibitor                          |
| 1.244874235 | 0.01002 | 1.066585781 | 0.17067 | KMO       | kynurenine 3-monooxygenase (kynurenine 3-hydroxylase)                    |
| 0.716977624 | 0.02269 | 1.00695555  | 0.90263 | KPNB1     | karyopherin (importin) beta 1                                            |
| 1.265755594 | 0.02958 | 1.163026534 | 0.05017 | KRAS      | v-Ki-ras2 Kirsten rat sarcoma viral oncogene homolog                     |
| 0.683967652 | 0.00135 | 0.865136691 | 0.1088  | KRBOX1    | KRAB box domain containing 1                                             |
| 0.186338798 | 0.00553 | 0.740206649 | 0.23238 | KRT1      | keratin 1                                                                |
| 0.454074209 | 0.03813 | 0.802741609 | 0.19701 | KRT17     | keratin 17                                                               |
| 0.21793956  | 0.0015  | 0.582366793 | 0.06568 | KRT2      | keratin 2                                                                |
| 0.36959608  | 0.01043 | 0.89128519  | 0.05962 | KRT23     | keratin 23 (histone deacetylase inducible)                               |
| 0.599154511 | 0.01283 | 0.984184022 | 0.92922 | KRT24     | keratin 24                                                               |
| 0.79774524  | 0.03825 | 0.974004269 | 0.53059 | KRT32     | keratin 32                                                               |
| 0.66021421  | 0.0167  | 0.866336856 | 0.1434  | KRT33A    | keratin 33A                                                              |
| 1.293248932 | 0.01748 | 1.092020546 | 0.28805 | KRT33B    | keratin 33B                                                              |
| 0.69839266  | 0.01858 | 0.924663278 | 0.33886 | KRT75     | keratin 75                                                               |
| 0.694477568 | 0.02742 | 0.892767519 | 0.45842 | KRT78     | keratin 78                                                               |
| 0.823020345 | 0.02323 | 0.886381699 | 0.22033 | KRTBP12   | keratin 8 pseudogene 12                                                  |
| 0.844986384 | 0.0464  | 1.083725967 | 0.24972 | KRT9      | keratin 9                                                                |
| 1.243149669 | 0.02454 | 1.048989328 | 0.2377  | KSR2      | kinase suppressor of ras 2                                               |
| 0.859160755 | 0.02918 | 0.971980988 | 0.65515 | LSMBT1    | l[3]mbt-like 1 (Drosophila)                                              |
| 0.51015233  | 0.03323 | 0.849096246 | 0.10121 | LADI      | ladinin 1                                                                |
| 0.646624466 | 0.02688 | 0.860352631 | 0.40623 | LAMA3     | laminin, alpha 3                                                         |
| 0.395842933 | 0.0004  | 0.687770909 | 0.12217 | LAMB4     | laminin, beta 4                                                          |
| 0.775930854 | 0.00742 | 0.912565489 | 0.13026 | LAMP1     | lysosomal-associated membrane protein 1                                  |
| 1.624504793 | 0.00832 | 1.181811547 | 0.12148 | LAMP3     | lysosomal-associated membrane protein 3                                  |
| 0.684441907 | 0.04016 | 0.920187651 | 0.0867  | LAMTOR2   | late endosomal/lysosomal adaptor, MAPK and MTOR activator 2              |
| 0.697855382 | 0.03089 | 0.868140228 | 0.2484  | LANCL1    | LanC lambiostic synthetase component C-like 1 (bacterial)                |

|             |         |             |         |              |                                                                                          |
|-------------|---------|-------------|---------|--------------|------------------------------------------------------------------------------------------|
| 1.390881972 | 0.03699 | 0.959929261 | 0.5933  | LARP1B       | La ribonucleoprotein domain family, member 1B                                            |
| 1.182631    | 0.04416 | 1.07997656  | 0.14087 | LARP1B       | La ribonucleoprotein domain family, member 1B                                            |
| 0.682073917 | 0.04969 | 0.877821798 | 0.05999 | LARS         | leucyl-tRNA synthetase                                                                   |
| 0.469110598 | 0.00206 | 0.941478465 | 0.69111 | LCE1B        | late cornified envelope 1B                                                               |
| 0.37138823  | 0.00018 | 0.78765886  | 0.24659 | LCE2B        | late cornified envelope 2B                                                               |
| 1.337000495 | 0.01891 | 1.18961851  | 0.07939 | LCN6         | lipocalin 6                                                                              |
| 1.353786279 | 0.01119 | 1.092777739 | 0.18129 | LCP2         | lymphocyte cytosolic protein 2 (SH2 domain containing leukocyte protein of 76kDa)        |
| 0.753667455 | 0.00957 | 0.888226796 | 0.12507 | LDB1         | LIM domain binding 1                                                                     |
| 0.675487042 | 0.01401 | 0.90000193  | 0.16561 | LGALS8       | lectin, galactoside-binding, soluble, 8                                                  |
| 0.552099424 | 0.00203 | 0.80641759  | 0.16084 | LGALS8       | lectin, galactoside-binding, soluble, 8                                                  |
| 1.17772279  | 0.04516 | 1.147902414 | 0.1121  | LGALS8-AS1   | LGALS8 antisense RNA 1 (non-protein coding)                                              |
| 1.204872315 | 0.04477 | 1.038659103 | 0.65524 | LGMM         | legumain                                                                                 |
| 1.821339667 | 0.01008 | 1.25402205  | 0.06533 | LGR5         | leucine-rich repeat containing G protein-coupled receptor 5                              |
| 1.267512522 | 0.02958 | 0.936921447 | 0.21013 | LIFR         | leukemia inhibitory factor receptor alpha                                                |
| 1.22436392  | 0.02543 | 0.986916546 | 0.73414 | LILRA1       | leukocyte immunoglobulin-like receptor, subfamily A (with TM domain), member 1           |
| 1.328685814 | 0.01154 | 1.147902414 | 0.07737 | LILRB4       | leukocyte immunoglobulin-like receptor, subfamily B (with TM and ITIM domains), member 4 |
| 0.571173123 | 0.00282 | 0.838581884 | 0.08466 | LMK2         | LIM domain kinase 2                                                                      |
| 0.751580739 | 0.01688 | 0.86573566  | 0.0642  | LIN7B        | lin-7 homolog B (C. elegans)                                                             |
| 0.605416542 | 0.01527 | 0.744322628 | 0.09099 | LIN7C        | lin-7 homolog C (C. elegans)                                                             |
| 0.573553512 | 0.01293 | 0.72597914  | 0.09415 | LINC00302    | long intergenic non-protein coding RNA 302                                               |
| 1.257884972 | 0.01941 | 1.042465761 | 0.57661 | LINC00470    | long intergenic non-protein coding RNA 470                                               |
| 1.316769922 | 0.00585 | 1.22343408  | 0.0806  | LINC01610    | leucine rich repeat and Ig domain containing 1                                           |
| 1.214194884 | 0.04568 | 1.108800644 | 0.08829 | LIMAN1L      | lectin, mannose-binding, 1 like                                                          |
| 0.806641759 | 0.04305 | 0.883315051 | 0.13604 | LMR81        | limb region 1 homolog (mouse)                                                            |
| 1.178539408 | 0.03813 | 1.065108203 | 0.23229 | LMCD1        | LIM and cysteine-rich domains 1                                                          |
| 0.741235905 | 0.02477 | 0.85027416  | 0.16608 | LMNA         | lamin A/C                                                                                |
| 1.266641254 | 0.04721 | 1.165309042 | 0.06136 | LMC3         | LIM domain only 3 (thrombin-like 2)                                                      |
| 0.280759861 | 0.04812 | 1.027217422 | 0.05894 | LOC100129388 | hypothetical protein LOC100129388                                                        |
| 1.183451022 | 0.04595 | 1.048262476 | 0.22336 | LOC100129597 | hypothetical LOC100129597                                                                |
| 1.159095952 | 0.04794 | 0.983502074 | 0.69781 | LOC100129797 | hypothetical LOC100129797                                                                |
| 0.652477474 | 0.01748 | 0.971307496 | 0.7516  | LOC100131544 | hypothetical LOC100131544                                                                |
| 1.20168605  | 0.02791 | 1.06470182  | 0.29145 | LOC100131666 | hypothetical LOC100131666                                                                |
| 1.284315809 | 0.01126 | 0.954701082 | 0.1134  | LOC100131733 | hypothetical LOC100131733                                                                |
| 1.171210181 | 0.04027 | 1.053361036 | 0.25957 | LOC100132311 | hypothetical LOC100132311                                                                |
| 1.367935304 | 0.00935 | 1.155085785 | 0.05326 | LOC100233207 | hypothetical LOC100233207                                                                |
| 1.39958866  | 0.0189  | 1.082975046 | 0.20351 | LOC100287626 | hypothetical LOC100287626                                                                |
| 0.621465274 | 0.02453 | 0.936921447 | 0.48524 | LOC100288157 | hypothetical LOC100288157                                                                |
| 0.75508396  | 0.01267 | 1.024022572 | 0.12673 | LOC100498859 | hypothetical LOC100498859                                                                |
| 1.631274987 | 0.00863 | 1.068055408 | 0.38748 | LOC100505500 | hypothetical LOC100505500                                                                |
| 1.210833084 | 0.02371 | 0.971307496 | 0.54835 | LOC100505564 | hypothetical LOC100505564                                                                |
| 1.217566019 | 0.0301  | 1.07997656  | 0.14561 | LOC100505877 | hypothetical LOC100505877                                                                |
| 0.578745108 | 0.02438 | 0.839149637 | 0.09364 | LOC100506168 | hypothetical LOC100506168                                                                |
| 1.191882575 | 0.04624 | 1.099616149 | 0.09439 | LOC100506177 | hypothetical LOC100506177                                                                |
| 1.232851225 | 0.01356 | 1.016774473 | 0.71089 | LOC100506387 | hypothetical LOC100506387                                                                |
| 0.665264521 | 0.00535 | 0.815072332 | 0.09535 | LOC100506653 | hypothetical LOC100506653                                                                |
| 1.205807828 | 0.04797 | 0.967947027 | 0.45623 | LOC100506766 | hypothetical LOC100506766                                                                |
| 1.463071221 | 0.0105  | 1.124278924 | 0.10183 | LOC100506777 | hypothetical LOC100506777                                                                |
| 1.226884977 | 0.0434  | 1.016070143 | 0.7678  | LOC100507007 | hypothetical LOC100507007                                                                |
| 1.259757174 | 0.01725 | 1.138804029 | 0.07695 | LOC100507063 | hypothetical LOC100507063                                                                |
| 1.257884972 | 0.01239 | 1.068805091 | 0.3896  | LOC1445571   | hypothetical LOC1445571                                                                  |
| 1.200803427 | 0.01858 | 1.101905116 | 0.07205 | LOC147791    | hypothetical protein LOC147791                                                           |
| 1.160703914 | 0.03866 | 0.976031761 | 0.5726  | LOC148824    | hypothetical LOC148824                                                                   |
| 1.194991205 | 0.04473 | 1.078480432 | 0.34722 | LOC153682    | hypothetical protein LOC153682                                                           |
| 0.746838732 | 0.04062 | 0.859756486 | 0.14649 | LOC202181    | hypothetical LOC202181                                                                   |
| 1.215026792 | 0.00786 | 1.043011927 | 0.32338 | LOC282435    | hypothetical LOC282435                                                                   |
| 1.244011653 | 0.03895 | 1.037419937 | 0.45453 | LOC283486    | hypothetical LOC283486                                                                   |
| 0.783497187 | 0.00972 | 0.920825697 | 0.28808 | LOC284014    | hypothetical protein LOC284014                                                           |
| 1.244011653 | 0.03718 | 1.140763716 | 0.14437 | LOC284112    | hypothetical protein LOC284112                                                           |
| 1.218410264 | 0.03662 | 1.131314463 | 0.07491 | LOC284440    | hypothetical LOC284440                                                                   |
| 1.220946513 | 0.00595 | 1.093656408 | 0.17445 | LOC284630    | hypothetical protein LOC284630                                                           |
| 1.273677475 | 0.02769 | 1.082224645 | 0.19228 | LOC284669    | hypothetical protein LOC284669                                                           |
| 1.172834949 | 0.03051 | 1.022428531 | 0.57954 | LOC285370    | hypothetical LOC285370                                                                   |
| 1.195819797 | 0.0278  | 1.052631155 | 0.28015 | LOC285740    | hypothetical LOC285740                                                                   |
| 1.286989247 | 0.03181 | 1.053361036 | 0.36124 | LOC285835    | hypothetical protein LOC285835                                                           |
| 1.194164187 | 0.01767 | 1.030986819 | 0.37064 | LOC286154    | hypothetical protein LOC286154                                                           |
| 1.303147149 | 0.03013 | 1.074494939 | 0.24897 | LOC375295    | hypothetical LOC375295                                                                   |
| 1.22603486  | 0.02051 | 0.984184022 | 0.74734 | LOC387647    | patched domain containing 3 pseudogene                                                   |
| 1.196648963 | 0.01538 | 0.950000383 | 0.60603 | LOC389641    | hypothetical LOC389641                                                                   |
| 1.174461971 | 0.03033 | 0.939522749 | 0.2257  | LOC389834    | ankyrin repeat domain 57 pseudogene                                                      |
| 0.765778999 | 0.04174 | 1.035264924 | 0.5133  | LOC389906    | hypothetical LOC389906                                                                   |
| 0.725476104 | 0.00299 | 0.997070819 | 0.05525 | LOC390940    | hypothetical protein LOC390940                                                           |
| 1.329607108 | 0.04352 | 1.051172909 | 0.40704 | LOC400794    | hypothetical LOC400794                                                                   |
| 1.379360922 | 0.01333 | 1.109569472 | 0.05434 | LOC401522    | hypothetical LOC401522                                                                   |
| 1.270150983 | 0.01753 | 1.019597683 | 0.65477 | LOC641467    | hypothetical LOC641467                                                                   |
| 0.49961359  | 0.00014 | 0.856188285 | 0.10239 | LOC642587    | NPC-A-5                                                                                  |
| 0.413798408 | 0.00771 | 0.851453708 | 0.12248 | LOC642587    | NPC-A-5                                                                                  |
| 1.33885257  | 0.00935 | 1.161361837 | 0.05934 | LOC642852    | hypothetical LOC642852                                                                   |
| 1.210833084 | 0.04469 | 1.016774473 | 0.72042 | LOC643711    | platelet-activating factor acetylhydrolase, isoform 1b, beta subunit 300Da pseudogene    |
| 1.375541818 | 0.01991 | 1.062895674 | 0.33911 | LOC643837    | hypothetical LOC643837                                                                   |
| 1.22436392  | 0.03695 | 0.949342121 | 0.32901 | LOC644246    | hypothetical LOC644246                                                                   |
| 0.675487042 | 0.01252 | 0.848615796 | 0.17983 | LOC645638    | WDMN1-like pseudogene                                                                    |
| 1.151080491 | 0.01073 | 1.001807256 | 0.36943 | LOC646168    | hypothetical LOC646168                                                                   |
| 1.32408891  | 0.00377 | 1.051172909 | 0.33499 | LOC646576    | hypothetical LOC646576                                                                   |
| 0.775393206 | 0.04267 | 0.879649076 | 0.05309 | LOC728431    | hypothetical LOC728431                                                                   |
| 1.230291345 | 0.03226 | 0.97063447  | 0.60948 | LOC729970    | hCG2028352-like                                                                          |
| 1.286989247 | 0.01275 | 1.21167266  | 0.08131 | LOC730101    | hypothetical LOC730101                                                                   |
| 1.28788163  | 0.00259 | 0.72516617  | 0.16196 | LOC84989     | hypothetical LOC84989                                                                    |
| 0.248101094 | 0.00097 | 0.554061174 | 0.06205 | LOX          | lysyl oxidase                                                                            |
| 0.618995145 | 0.0193  | 0.759962428 | 0.11595 | LOX          | lysyl oxidase                                                                            |
| 1.199139914 | 0.02163 | 1.027401439 | 0.61043 | LOXL2        | lysyl oxidase-like 2                                                                     |
| 0.70514898  | 0.02193 | 0.834509281 | 0.1456  | LPAR3        | lysophosphatidic acid receptor 3                                                         |
| 0.746630998 | 0.02333 | 0.898755127 | 0.14302 | LPGA1        | lysophosphatidylglycerol acyltransferase 1                                               |
| 1.223488041 | 0.04375 | 1.002332948 | 0.1165  | LPL          | leucine-rich repeats and calponin homology (CH) domain containing 2                      |
| 1.511519928 | 0.01103 | 1.293248932 | 0.05361 | LRG1         | leucine-rich alpha-2-glycoprotein 1                                                      |
| 1.477338064 | 0.04497 | 0.963261894 | 0.77512 | LRF1         | ligand dependent nuclear receptor interacting factor 1                                   |
| 1.32592576  | 0.03459 | 1.098092814 | 0.23754 | LRPAP1       | low density lipoprotein receptor-related protein associated protein 1                    |
| 0.611744021 | 0.00225 | 0.873572896 | 0.17588 | LRRC1        | leucine rich repeat containing 1                                                         |
| 1.191882575 | 0.03501 | 0.938221197 | 0.31836 | LRR37A3      | leucine rich repeat containing 37, member A3                                             |
| 1.292352831 | 0.00519 | 1.080752112 | 0.17455 | LRR1         | leucine rich repeat kinase 1                                                             |
| 1.292352831 | 0.00603 | 1.024556823 | 0.61835 | LRR12        | leucine rich repeat transmembrane neuronal 2                                             |
| 1.32408891  | 0.0062  | 1           | 0.99885 | LRR11        | leucine-rich repeats and WD repeat domain containing 1                                   |
| 0.61985385  | 0.01402 | 0.893165852 | 0.35461 | LTBR         | leukotriene B4 receptor                                                                  |
| 1.408344227 | 0.02247 | 1.193355743 | 0.06336 | LTK          | leukocyte receptor tyrosine kinase                                                       |
| 0.431999158 | 0.01619 | 0.889232549 | 0.20472 | LYN1         | LY6/neurotinin 1                                                                         |
| 0.50557604  | 0.00064 | 0.85027416  | 0.20082 | LYPD5        | LY6/PLAUR domain containing 5                                                            |
| 0.581157054 | 0.00065 | 0.923382311 | 0.35482 | LYPD6        | LY6/PLAUR domain containing 6B                                                           |
| 0.621574834 | 0.0213  | 0.838581884 | 0.07731 | MACE1        | microtubule-actin crosslinking factor 1                                                  |
| 1.367935304 | 0.0488  | 1.083725967 | 0.25647 | MAGE12       | MAGE-like 2                                                                              |
| 0.656651007 | 0.02001 | 0.994869251 | 0.05931 | MAG1         | membrane associated guanylate kinase, WW and PDZ domain containing 1                     |
| 0.55363232  | 0.0196  | 0.835660959 | 0.11844 | MAGOH        | magnachin homolog, proliferation-associated (Drosophila)                                 |
| 1.849326556 | 0.02143 | 1.459020344 | 0.06361 | MAN1A1       | mannosidase, alpha, class 1A, member 1                                                   |
| 1.48246701  | 0.0395  | 1.187595666 | 0.25509 | MANEA        | mannosidase, endo-alpha                                                                  |
| 1.742308384 | 0.00339 | 1.097331938 | 0.53051 | MANEA        | mannosidase, endo-alpha                                                                  |
| 0.67782163  | 0.04332 | 0.914465089 | 0.28889 | MAP1LC3A     | microtubule-associated protein 1 light chain 3 alpha                                     |
| 0.682073917 | 0.03191 | 0.920187551 | 0.34808 | MAP1LC3A     | microtubule-associated protein 1 light chain 3 alpha                                     |
| 1.28788163  | 0.02784 | 0.97535462  | 0.72135 | MAP2K1       | mitogen-activated protein kinase kinase 1                                                |
| 1.294145654 | 0.0146  | 1.125058485 | 0.12644 | MAP3K13      | mitogen-activated protein kinase kinase kinase 13                                        |
| 1.263127262 | 0.0315  | 1.089752112 | 0.18202 | MAP3K13      | mitogen-activated protein kinase kinase kinase 13                                        |
| 0.66204455  | 0.03816 | 0.90062598  | 0.12422 | MAP3K4       | mitogen-activated protein kinase kinase kinase 4                                         |
| 0.721964598 | 0.01302 | 0.93221197  | 0.39775 | MAP3K9       | mitogen-activated protein kinase kinase kinase 9                                         |
| 0.654742712 | 0.00813 | 0.803752727 | 0.32654 | MAP4K4       | mitogen-activated protein kinase kinase kinase 4                                         |
| 0.700763725 | 0.03309 | 0.830470024 | 0.14789 | MAPK1        | mitogen-activated protein kinase 1                                                       |
| 0.668500248 | 0.00262 | 0.886381699 | 0.19797 | MAPK1        | mitogen-activated protein kinase 1                                                       |
| 0.649769531 | 0.0335  | 0.895025071 | 0.43264 | MAPK14       | mitogen-activated protein kinase 14                                                      |
| 0.677362489 | 0.02432 | 0.872362706 | 0.22066 | MAPK14       | mitogen-activated protein kinase 14                                                      |
| 0.591495602 | 0.01659 | 0.889232531 | 0.29279 | MAPK14       | mitogen-activated protein kinase 14                                                      |
| 1.187595666 | 0.04487 | 1.111879158 | 0.14867 | MAPK15       | mitogen-activated protein kinase 15                                                      |
| 0.691161013 | 0.0418  | 0.936921447 | 0.36204 | MAPRE2       | microtubule-associated protein, RP/EB family, member 2                                   |
| 0.645281245 | 0.02213 | 0.890075733 | 0.24882 | MAPT         | microtubule-associated protein tau                                                       |
| 0.636838738 | 0.00713 | 0.80682831  | 0.06488 | MAPT         | microtubule-associated protein tau                                                       |
| 0.67580314  | 0.0026  | 0.920187551 | 0.49163 | MAPT         | microtubule-associated protein tau                                                       |
| 1.577893682 | 0.04367 | 0.983502074 | 0.91019 | MARCK1       | membrane-associated ring finger (C3HC4) 1                                                |
| 1.342572503 | 0.03081 | 1.086734863 | 0.44925 | MARCK1       | membrane-associated ring finger (C3HC4) 1                                                |
| 1.250062303 | 0.01892 | 1.0238469   | 0.71284 | MARCK6       | membrane-associated ring finger (C3HC4) 6                                                |
| 0.822450069 | 0.04307 | 0.933032992 | 0.15856 | MARCK7       | membrane-associated ring finger (C3HC4) 7                                                |
| 1.232851225 | 0.03839 | 0.992404375 | 0.90224 | MARCKS       | myristoylated alanine-rich protein kinase C substrate                                    |
| 0.621465274 | 0.02243 | 1.063262743 | 0.1216  | MAT1         | Mat-21 domain containing 1                                                               |
| 0.642603169 | 0.01138 | 0.868742185 | 0.09657 | MBD1         | methyl-CpG binding domain protein 1                                                      |
| 1.225185332 | 0.0431  | 1.090507733 | 0.34118 | MC1R         | melanocortin 1 receptor (alpha melanocyte stimulating hormone receptor)                  |
| 1.220946513 | 0.02515 | 1.080752402 | 0.12373 | MC3R         | melanocortin 3 receptor                                                                  |
| 1.41029796  | 0.00346 | 1.111879158 | 0.18628 | MCHR1        | melanin-concentrating hormone receptor 1                                                 |
| 0.730166095 | 0.020   | 0.992404375 | 0.312   | MCM3AP-AS1   | MCM3AP antisense RNA 1 (non-protein coding)                                              |
| 0.636397468 | 0.04788 | 0.842062054 | 0.12987 | MCM4         | minichromosome maintenance complex component 4                                           |
|             |         |             |         |              |                                                                                          |

|             |         |             |         |          |                                                                                                      |
|-------------|---------|-------------|---------|----------|------------------------------------------------------------------------------------------------------|
| 1.311302014 | 0.00727 | 1.056285625 | 0.36947 | MEF2D    | myocyte enhancer factor 2D                                                                           |
| 1.566994374 | 0.01034 | 0.982820599 | 0.77301 | MESDC1   | mesoderm development candidate 1                                                                     |
| 1.242288282 | 0.03658 | 1.062895674 | 0.31891 | MESDC2   | mesoderm development candidate 2                                                                     |
| 0.743291492 | 0.04216 | 0.885767519 | 0.23271 | METTL16  | methyltransferase like 16                                                                            |
| 1.534746096 | 0.01192 | 1.132888985 | 0.0703  | METTL21A | methyltransferase like 21A                                                                           |
| 1.235418637 | 0.02788 | 1.090507733 | 0.11661 | METTL23  | methyltransferase like 23                                                                            |
| 1.260503392 | 0.02348 | 1.039579435 | 0.52121 | MF12-AS1 | MF12 antisense RNA 1 (non-protein coding)                                                            |
| 0.581963267 | 0.01906 | 0.763658749 | 0.06655 | MFN1     | mitofusin 1                                                                                          |
| 1.237132749 | 0.03061 | 1.004167543 | 0.91777 | MFS4     | major facilitator superfamily domain containing 4                                                    |
| 1.365097178 | 0.01141 | 1.030253954 | 0.52807 | MFS5D7   | major facilitator superfamily domain containing 7                                                    |
| 1.622254331 | 0.00084 | 1.038818505 | 0.08857 | MFGT2    | mannosyl (alpha-1,6)-glycoprotein beta-1,2-N-acetylglucosaminyltransferase                           |
| 1.692317193 | 0.00697 | 1.153485605 | 0.15024 | MGAT2    | mannosyl (alpha-1,6)-glycoprotein beta-1,2-N-acetylglucosaminyltransferase                           |
| 1.479387509 | 0.00061 | 1.085981856 | 0.22711 | MGATA4   | mannosyl (alpha-1,3)-glycoprotein beta-1,4-N-acetylglucosaminyltransferase, isozyme A                |
| 1.191682575 | 0.04888 | 1.133669413 | 0.076   | MGC34800 | hypothetical protein MGC34800                                                                        |
| 0.742261785 | 0.01904 | 1.046810282 | 0.65309 | MGEA5    | meningioma expressed antigen 5 (hyaluronidase)                                                       |
| 0.690158677 | 0.02216 | 0.883927531 | 0.10656 | MGEA5    | meningioma expressed antigen 5 (hyaluronidase)                                                       |
| 1.888876502 | 0.00084 | 1.181511547 | 0.14474 | MGF1     | rat1a G1a protein                                                                                    |
| 0.693515485 | 0.00709 | 0.893785162 | 0.1029  | MGST2    | microsomal glutathione S-transferase 2                                                               |
| 1.333298677 | 0.02539 | 1.024556823 | 0.72118 | MIAT     | myocardial infarction associated transcript (non-protein coding)                                     |
| 0.550189305 | 0.01135 | 0.824733549 | 0.06228 | MI82     | mindbomb homolog 2 (Drosophila)                                                                      |
| 1.17609125  | 0.02344 | 1.126619228 | 0.05336 | MILR1    | mast cell immunoglobulin-like receptor 1                                                             |
| 1.335148303 | 0.03096 | 1.202562558 | 0.93342 | MIR143HG | MIR143 host gene (non-protein coding)                                                                |
| 2.276788058 | 0.00191 | 1.143930973 | 0.12807 | MIR155HG | MIR155 host gene (non-protein coding)                                                                |
| 0.622868708 | 0.01086 | 0.894409002 | 0.31206 | MIR210HG | MIR210 host gene (non-protein coding)                                                                |
| 1.232852325 | 0.02651 | 1.159095952 | 0.15147 | MIR214   | microRNA 214                                                                                         |
| 0.67877249  | 0.01422 | 0.927873476 | 0.20093 | MIS18A   | MIS18 kinetochore protein homolog A (S. pombe)                                                       |
| 0.687779099 | 0.00252 | 1.020304659 | 0.79405 | MK167    | antigen identified by monoclonal antibody Ki-67                                                      |
| 0.71998266  | 0.00289 | 0.934975198 | 0.51409 | MKN1     | muskelin 1, intracellular mediator containing kelch motifs                                           |
| 0.632878297 | 0.00385 | 0.865136691 | 0.10017 | MKNK2    | MAP kinase interacting serine/threonine kinase 2                                                     |
| 0.745355193 | 0.04805 | 0.879649076 | 0.14718 | MLANA    | melan-A                                                                                              |
| 0.421615555 | 0.00919 | 0.705637922 | 0.0833  | MLANA    | melan-A                                                                                              |
| 1.485552921 | 0.03929 | 1.071737463 | 0.35007 | MLL      | myeloid/lymphoid or mixed-lineage leukemia (trithorax homolog, Drosophila)                           |
| 0.606627541 | 0.00208 | 0.851453708 | 0.22529 | MLT10    | myeloid/lymphoid or mixed-lineage leukemia (trithorax homolog, Drosophila); translocated to, 10      |
| 0.65342257  | 0.01552 | 0.854409741 | 0.17393 | MLL2A    | myeloid/lymphoid or mixed-lineage leukemia (trithorax homolog, Drosophila); translocated to, 4       |
| 1.17609125  | 0.0448  | 1.102669163 | 0.07964 | MLYCD    | malonyl-CoA decarboxylase                                                                            |
| 1.195819797 | 0.04105 | 1.061423209 | 0.14996 | MMP24    | matrix metalloproteinase 24 (membrane-inserted)                                                      |
| 3.101572825 | 0.00493 | 1.250929208 | 0.40996 | MMP3     | matrix metalloproteinase 3 (stromelysin 1, progelatinase)                                            |
| 1.256757174 | 0.00725 | 1.195497977 | 0.31858 | MOP1     | myelin-associated oligodendrocyte basic protein                                                      |
| 1.257013375 | 0.02029 | 1.125058485 | 0.12277 | MOC31    | molybdenum cofactor synthesis 1                                                                      |
| 0.833351207 | 0.03952 | 0.961927455 | 0.66091 | MOC33    | molybdenum cofactor synthesis 3                                                                      |
| 1.38792719  | 0.00486 | 1.063632673 | 0.40379 | MOC2     | MOCO sulphurase C-terminal domain containing 2                                                       |
| 0.596667872 | 0.01142 | 0.728499557 | 0.06752 | MP2L2    | myelin protein zero-like 2                                                                           |
| 0.548669569 | 0.02343 | 0.87417862  | 0.11909 | MRP127   | mitochondrial ribosomal protein L27                                                                  |
| 0.647073827 | 0.02954 | 0.910272332 | 0.11425 | MRP142   | mitochondrial ribosomal protein L42                                                                  |
| 0.793883931 | 0.03487 | 0.942784536 | 0.19662 | MRPL48   | mitochondrial ribosomal protein L48                                                                  |
| 1.272794935 | 0.03847 | 1.130530567 | 0.1114  | MRPS31   | mitochondrial ribosomal protein S31                                                                  |
| 2.745368863 | 0.00042 | 1.455989549 | 0.06333 | MS4A1    | membrane-spanning 4-domains, subfamily A, member 1                                                   |
| 3.050403307 | 0.00289 | 1.788809804 | 0.05019 | MS4A1    | membrane-spanning 4-domains, subfamily A, member 1                                                   |
| 1.837825767 | 0.01275 | 1.195497977 | 0.15884 | MS4A1    | membrane-spanning 4-domains, subfamily A, member 1                                                   |
| 1.229052449 | 0.01162 | 0.933683179 | 0.51409 | MS12     | musashi homolog 2 (Drosophila)                                                                       |
| 1.310393404 | 0.02686 | 1.118061851 | 0.06669 | MS12     | musashi homolog 2 (Drosophila)                                                                       |
| 1.602139755 | 0.02466 | 1.074004472 | 0.499   | MSR1     | macrophage scavenger receptor 1                                                                      |
| 0.77382497  | 0.02433 | 0.991029563 | 0.87929 | MST1P9   | macrophage stimulating 1 (hepatocyte growth factor-like) pseudogene 9                                |
| 0.65747138  | 0.01364 | 0.918276162 | 0.26634 | MSTR1R   | macrophage stimulating 1 receptor (c-met-related tyrosine kinase)                                    |
| 0.512122288 | 0.01772 | 0.873064988 | 0.31858 | MS14     | serine/threonine protein kinase MS14                                                                 |
| 0.751580739 | 0.02696 | 1.082224645 | 0.32574 | MSX2     | msh homeobox 2                                                                                       |
| 0.739693755 | 0.02419 | 1.071030823 | 0.3477  | MT1F     | metallothionein 1F                                                                                   |
| 0.79940583  | 0.02665 | 1.061423209 | 0.35034 | MT1G     | metallothionein 1G                                                                                   |
| 0.819036698 | 0.01013 | 1.016070143 | 0.79488 | MT1H     | metallothionein 1H                                                                                   |
| 0.62545454  | 0.02972 | 0.938221217 | 0.63638 | MT1X     | metallothionein 1X                                                                                   |
| 0.625031151 | 0.00621 | 0.951977908 | 0.66794 | MT1X     | metallothionein 1X                                                                                   |
| 0.721964598 | 0.03856 | 0.945402117 | 0.59049 | MTAP     | methylthioadenosine phosphorylase                                                                    |
| 0.684441907 | 0.02641 | 0.910669834 | 0.17647 | MTERFD3  | MTERF domain containing 3                                                                            |
| 1.73027381  | 0.00851 | 1.143138335 | 0.1429  | MTHFD2   | methylentetrahydrofolate dehydrogenase (NADP+ dependent) 2, methylenetetrahydrofolate cyclohydrolase |
| 0.785672517 | 0.04545 | 0.948684315 | 0.36484 | MTMR11   | myotubularin related protein 11                                                                      |
| 0.670241342 | 0.01134 | 0.90001393  | 0.14568 | MTMR11   | myotubularin related protein 11                                                                      |
| 0.803850991 | 0.01143 | 0.87372896  | 0.11352 | MTMR2    | myotubularin related protein 2                                                                       |
| 1.198309021 | 0.04286 | 1.002081605 | 0.95441 | MTMR7    | myotubularin related protein 7                                                                       |
| 1.214194884 | 0.0135  | 1.064370182 | 0.3356  | MTOR     | mechanistic target of rapamycin (serine/threonine kinase)                                            |
| 0.608783009 | 0.02193 | 0.872362706 | 0.13659 | MTU1S    | microtubule associated tumor suppressor 1                                                            |
| 0.715480325 | 0.0054  | 0.925396316 | 0.0606  | MYC      | v-myc myelocytomatosis viral oncogene homolog (avian)                                                |
| 1.402492521 | 0.00301 | 1.083725967 | 0.26516 | MYO6     | myosins overexpressed (in a subset of [11;14] positive multiple myelomas)                            |
| 1.22603486  | 0.04372 | 1.038859103 | 0.53503 | MYH11    | myosin, heavy chain 11, smooth muscle                                                                |
| 0.707106781 | 0.03902 | 0.842062954 | 0.14668 | MYH14    | myosin, heavy chain 14, non-muscle                                                                   |
| 0.752623374 | 0.03739 | 0.957273458 | 0.42433 | MYL6     | myosin, light chain 6, alkali, smooth muscle and non-muscle                                          |
| 0.628942486 | 0.01214 | 0.854409741 | 0.06342 | MYO5A    | myosin VA (heavy chain 12, myosin)                                                                   |
| 0.882548859 | 0.03825 | 0.87417862  | 0.21611 | MYO5B    | myosin VB                                                                                            |
| 0.830470024 | 0.01004 | 0.974004269 | 0.65071 | MYO9A    | myosin IXA                                                                                           |
| 0.641268301 | 0.01685 | 0.801625329 | 0.10016 | MYO9A    | myosin IXA                                                                                           |
| 0.66296288  | 0.01556 | 0.874784765 | 0.06108 | MYOF     | myoferlin                                                                                            |
| 1.32408891  | 0.0033  | 1.051127209 | 0.52396 | MYPDP    | Myb-related transcription factor, partner of profilin                                                |
| 0.765248385 | 0.0429  | 0.946713831 | 0.0652  | MZT2B    | mitotic spindle organizing protein 2B                                                                |
| 0.561367011 | 0.0168  | 0.776468875 | 0.10017 | N4BP2L2  | NEDD4 binding protein 2-like 2                                                                       |
| 1.247465572 | 0.01487 | 1.148698355 | 0.09355 | NA       | NA                                                                                                   |
| 0.620283649 | 0.04569 | 0.987600861 | 0.88597 | NA       | NA                                                                                                   |
| 1.223488041 | 0.04897 | 1.100378609 | 0.12693 | NA       | NA                                                                                                   |
| 1.24147492  | 0.02857 | 1.01853201  | 0.86509 | NA       | NA                                                                                                   |
| 1.2397077   | 0.02253 | 1.047536137 | 0.34108 | NA       | NA                                                                                                   |
| 0.718470088 | 0.0139  | 0.917639882 | 0.39142 | NA       | NA                                                                                                   |
| 1.251796459 | 0.04466 | 1.095052471 | 0.06199 | NA       | NA                                                                                                   |
| 1.159899655 | 0.028   | 1.003471749 | 0.94231 | NA       | NA                                                                                                   |
| 1.441928871 | 0.0316  | 1.019597683 | 0.78071 | NA       | NA                                                                                                   |
| 0.628942486 | 0.01829 | 0.831045862 | 0.06186 | NA       | NA                                                                                                   |
| 1.519924856 | 0.00886 | 1.27213759  | 0.06494 | NA       | NA                                                                                                   |
| 0.69477568  | 0.02179 | 1.064370182 | 0.39509 | NA       | NA                                                                                                   |
| 0.76684133  | 0.02911 | 0.876605721 | 0.05551 | NA       | NA                                                                                                   |
| 1.25092908  | 0.0383  | 1.067325338 | 0.25031 | NA       | NA                                                                                                   |
| 1.377450046 | 0.00311 | 1.133669413 | 0.07481 | NA       | NA                                                                                                   |
| 0.673615788 | 0.02429 | 1.08113827  | 0.74775 | NA       | NA                                                                                                   |
| 0.713012859 | 0.0449  | 0.883315051 | 0.20434 | NA       | NA                                                                                                   |
| 0.756808396 | 0.03579 | 0.838568184 | 0.06315 | NA       | NA                                                                                                   |
| 1.157490217 | 0.03795 | 1.067325338 | 0.18553 | NA       | NA                                                                                                   |
| 1.262252032 | 0.02233 | 1.108032348 | 0.14977 | NA       | NA                                                                                                   |
| 1.25062303  | 0.0458  | 1.090175298 | 0.82303 | NA       | NA                                                                                                   |
| 0.608783009 | 0.00765 | 0.824733549 | 0.10706 | NA       | NA                                                                                                   |
| 0.668963777 | 0.04411 | 0.918912883 | 0.34143 | NA       | NA                                                                                                   |
| 1.185914499 | 0.03828 | 1.072516617 | 0.10156 | NA       | NA                                                                                                   |
| 1.306765254 | 0.0086  | 1.0453601   | 0.53974 | NA       | NA                                                                                                   |
| 0.64484125  | 0.01576 | 0.893786162 | 0.09063 | NA       | NA                                                                                                   |
| 0.61423949  | 0.00931 | 1.0193937   | 0.61532 | NA       | NA                                                                                                   |
| 1.43893358  | 0.01329 | 1.025978145 | 0.71976 | NA       | NA                                                                                                   |
| 1.279872414 | 0.01094 | 1.111879158 | 0.09908 | NA       | NA                                                                                                   |
| 1.163926534 | 0.04017 | 1.040300267 | 0.41752 | NA       | NA                                                                                                   |
| 0.788400174 | 0.03334 | 0.921464286 | 0.23584 | NA       | NA                                                                                                   |
| 0.74949801  | 0.00454 | 0.921464286 | 0.25443 | NA       | NA                                                                                                   |
| 1.353786279 | 0.03648 | 1.197478705 | 0.0879  | NA       | NA                                                                                                   |
| 1.232852325 | 0.04757 | 1.021012126 | 0.616   | NA       | NA                                                                                                   |
| 1.195819797 | 0.03631 | 1.184271612 | 0.07202 | NA       | NA                                                                                                   |
| 0.599154511 | 0.02936 | 1.098092814 | 0.40702 | NA       | NA                                                                                                   |
| 1.190311696 | 0.04296 | 1.0406382   | 0.91241 | NA       | NA                                                                                                   |
| 1.494849249 | 0.02202 | 1.105730653 | 0.29523 | NA       | NA                                                                                                   |
| 1.170398641 | 0.02959 | 1.015366101 | 0.76048 | NA       | NA                                                                                                   |
| 1.29056249  | 0.04711 | 1.090507733 | 0.07406 | NA       | NA                                                                                                   |
| 0.75236293  | 0.01855 | 0.91383145  | 0.2013  | NA       | NA                                                                                                   |
| 1.164733586 | 0.0396  | 1.057018041 | 0.22552 | NA       | NA                                                                                                   |
| 1.23627261  | 0.04585 | 1.099616149 | 0.10169 | NA       | NA                                                                                                   |
| 1.215036792 | 0.00971 | 1.119612889 | 0.08141 | NA       | NA                                                                                                   |
| 1.185092771 | 0.03766 | 1.143930973 | 0.14761 | NA       | NA                                                                                                   |
| 0.622868708 | 0.01473 | 0.890075733 | 0.35734 | NA       | NA                                                                                                   |
| 0.480297432 | 0.00704 | 0.808320669 | 0.13188 | NA       | NA                                                                                                   |
| 1.198309021 | 0.00341 | 1.035802764 | 0.14513 | NA       | NA                                                                                                   |
| 1.181811547 | 0.04662 | 1.095811766 | 0.06382 | NA       | NA                                                                                                   |
| 1.313121125 | 0.01542 | 1.143930973 | 0.07089 | NA       | NA                                                                                                   |
| 1.255271991 | 0.02868 | 1.04608494  | 0.4627  | NA       | NA                                                                                                   |
| 0.499307333 | 0.00539 | 0.790041312 | 0.05234 | NA       | NA                                                                                                   |
| 1.32408891  | 0.02295 | 1.11108729  | 0.10372 | NA       | NA                                                                                                   |
| 0.750520549 | 0.01523 | 0.899378312 | 0.24413 | NA       | NA                                                                                                   |
| 0.610050255 | 0.00038 | 0.824162085 | 0.07749 | NA       | NA                                                                                                   |
| 0.795536484 | 0.02296 | 1.003471749 | 0.95254 | NA       | NA                                                                                                   |
| 1.758079122 | 0.00313 | 1.101141598 | 0.11645 | NA       | NA                                                                                                   |
| 0.784584098 | 0.02273 | 0.950000383 | 0.35874 | NA       | NA                                                                                                   |
| 1.183451022 | 0.04247 | 1.068080991 | 0.23299 | NA       | NA                                                                                                   |
| 1.220946513 | 0.04928 | 1.021720983 | 0.67766 | NA       | NA                                                                                                   |
| 0.751580739 | 0.00775 | 0.863938187 | 0.0924  | NA       | NA                                                                                                   |
| 1.245737416 | 0.03818 | 1.068065408 | 0.14008 | NA       | NA                                                                                                   |
| 0.738157203 | 0.04735 | 0.893786162 | 0.14425 | NA       | NA                                                                                                   |
| 0.745355193 | 0.01543 | 0.885153765 | 0.22118 | NA       | NA                                                                                                   |
| 1.260503392 | 0.04321 | 1.125058485 | 0.05936 | NA       | NA                                                                                                   |



0,622868708 0,02187 0,795536484 0,22749 NA NA  
1,192508872 0,02847 1,081474763 0,201 NA NA  
1,208317843 0,02445 0,90062598 0,08126 NA NA  
1,254402205 0,01881 1,100378609 0,06638 NA NA  
0,600818025 0,04813 0,868742185 0,26296 NA NA  
1,347233577 0,00524 1,04123598 0,6406 NA NA  
1,331451613 0,00911 1,076986376 0,34136 NA NA  
0,76950361 0,0301 0,882702996 0,06004 NA NA  
0,802181166 0,00595 0,906261938 0,144 NA NA  
0,801069878 0,02702 0,925304428 0,20419 NA NA  
0,326450318 0,02497 1,009051634 0,8243 NA NA  
1,191682575 0,04484 1,088907015 0,2664 NA NA  
0,765248385 0,00878 0,976031761 0,65733 NA NA  
1,243149669 0,03387 1,028113827 0,70182 NA NA  
1,155886707 0,03657 1,033830736 0,45101 NA NA  
0,792234811 0,03416 0,951977908 0,50829 NA NA  
0,507331273 0,04089 0,890075733 0,26886 NA NA  
0,731028724 0,0279 0,893165852 0,08039 NA NA  
0,643940815 0,0371 0,952637998 0,37057 NA NA  
0,738669032 0,02695 0,905633983 0,17552 NA NA  
1,98762187 0,00282 1,198309321 0,14579 NA NA  
0,709581578 0,02737 0,87599315 0,12378 NA NA  
1,487613762 0,04139 1,020304659 0,80738 NA NA  
0,759435845 0,04481 0,920187651 0,23438 NA NA  
0,73153561 0,02288 0,86934456 0,06443 NA NA  
1,195819797 0,04024 1,077733145 0,15034 NA NA  
1,238848998 0,04523 1,081474763 0,2065 NA NA  
1,25271991 0,03923 1,062905674 0,36834 NA NA  
0,806641759 0,03262 1,034547582 0,6231 NA NA  
0,713012859 0,00525 0,940826108 0,43936 NA NA  
0,647072827 0,01174 0,835666959 0,16964 NA NA  
1,18421612 0,0268 1,079228237 0,28278 NA NA  
0,661127303 0,00495 0,90062598 0,05327 NA NA  
1,340712592 0,00264 1,119612889 0,08867 NA NA  
0,748980467 0,04609 0,884540435 0,05543 NA NA  
0,862741345 0,04098 0,938221197 0,12505 NA NA  
0,77916458 0,02197 0,986232704 0,84203 NA NA  
1,28697483 0,02603 1,019597883 0,59486 NA NA  
1,780151467 0,00051 1,28877463 0,05677 NA NA  
0,755236293 0,04329 0,936921447 0,22333 NA NA  
1,350037985 0,0282 1,088242442 0,16819 NA NA  
1,341642225 0,03291 0,976708529 0,71869 NA NA  
0,77904843 0,04745 0,908778116 0,28623 NA NA  
1,795020101 0,03939 1,167367395 0,15819 NA NA  
0,747942879 0,02428 1,070288698 0,22165 NA NA  
0,740206649 0,00331 0,890075733 0,21622 NA NA  
0,747424624 0,04671 0,874784765 0,07773 NA NA  
1,230291345 0,03519 1,068805991 0,13669 NA NA  
0,634635443 0,00141 0,882702996 0,12652 NA NA  
1,2397077 0,0088 1,101141598 0,14198 NA NA  
1,304050735 0,01402 1,125838586 0,0546 NA NA  
1,353786279 0,02531 1,125838586 0,08374 NA NA  
1,17772279 0,03608 0,988285652 0,80672 NA NA  
1,194163187 0,04475 1,069547088 0,15096 NA NA  
1,245737416 0,03716 1,121494281 0,11299 NA NA  
1,422077411 0,00566 1,17609125 0,0662 NA NA  
0,840896415 0,02336 0,917004043 0,11724 NA NA  
0,697371833 0,04349 0,948026965 0,30035 NA NA  
0,739181216 0,01205 0,98549337 0,80454 NA NA  
0,811889581 0,03525 0,868742185 0,06658 NA NA  
0,789493887 0,04963 0,905006463 0,08429 NA NA  
0,754712984 0,00157 0,888226796 0,33052 NA NA  
1,186736798 0,0405 0,996540263 0,96356 NA NA  
0,795536484 0,01708 0,991716731 0,89064 NA NA  
1,502119927 0,00182 1,224888041 0,07599 NA NA  
1,491744027 0,0057 1,158292806 0,29224 NA NA  
1,53368266 0,00226 1,226884977 0,08012 NA NA  
1,231144413 0,03962 1,111108729 0,0869 NA NA  
1,2397077 0,01333 0,976031761 0,70224 NA NA  
1,195819797 0,04535 1,061423209 0,31022 NA NA  
1,20163605 0,03536 1,061423209 0,4072 NA NA  
1,240567298 0,0498 1,088907015 0,20576 NA NA  
0,735093668 0,04255 0,859160755 0,154 NA NA  
0,617281303 0,01893 0,863339559 0,07025 NA NA  
0,613442489 0,00225 0,908184818 0,08773 NA NA  
0,587638164 0,01084 0,901250463 0,16897 NA NA  
1,171210181 0,03998 1,044635763 0,30347 NA NA  
0,862741345 0,03158 0,993092495 0,89161 NA NA  
1,197478705 0,03327 0,995849753 0,93957 NA NA  
1,161508732 0,04529 1,098854218 0,15718 NA NA  
1,33274825 0,01638 0,995159722 0,92581 NA NA  
0,75367455 0,04894 0,910038824 0,18925 NA NA  
1,25962998 0,0327 0,961260928 0,5451 NA NA  
2,019502595 0,00486 1,18883105 0,10672 NA NA  
0,689202576 0,02715 0,84264683 0,06629 NA NA  
0,483303049 0,02514 0,826450318 0,12092 NA NA  
0,662503509 0,02058 0,90000193 0,16307 NA NA  
0,741233505 0,03258 0,90375727 0,06626 NA NA  
0,687770909 0,00606 0,804966138 0,19768 NA NA  
0,753145233 0,04566 0,95899438 0,57441 NA NA  
1,408344227 0,03027 1,204972315 0,25957 NA NA  
1,278874244 0,03394 1,079228237 0,21725 NA NA  
1,46246701 0,00369 1,172022284 0,07956 NA NA  
0,808320869 0,0177 0,96727633 0,65321 NA NA  
0,692074858 0,00943 0,944747041 0,47641 NA NA  
1,269270886 0,03477 1,076240125 0,35476 NA NA  
0,760489377 0,01173 0,829894586 0,05666 NA NA  
1,858321349 0,00731 1,17956692 0,10825 NA NA  
0,681129017 0,0131 0,84123111 0,06704 NA NA  
2 0,00031 1,190856849 0,0958 NA NA  
1,416175438 0,02104 1,110338834 0,10081 NA NA  
1,309485423 0,01048 1,090507733 0,07923 NA NA  
1,203303026 0,03717 1,040900267 0,39129 NA NA  
1,221735884 0,01508 1,090037733 0,22858 NA NA  
0,800442217 0,02256 0,938871747 0,43079 NA NA  
0,782411782 0,03416 0,898755127 0,05817 NA NA  
0,763658749 0,04124 0,845572287 0,05034 NA NA  
1,218410264 0,04134 1,105730653 0,13938 NA NA  
1,28866251 0,01214 1,111108729 0,0809 NA NA  
1,40930755 0,04447 1,050444544 0,48396 NA NA  
1,311302014 0,04584 0,963261894 0,37068 NA NA  
1,356604327 0,02038 0,961927455 0,56141 NA NA  
1,41519416 0,01987 1,021720083 0,64421 NA NA  
1,297738767 0,03896 1,204972315 0,05917 NA NA  
1,502119927 0,03863 1,172834949 0,13932 NA NA  
0,657927263 0,00076 0,828744004 0,06789 NA NA  
1,361314116 0,04341 1,034547582 0,57657 NA NA  
1,589970502 0,03722 0,986232704 0,82249 NA NA  
1,466116757 0,02789 1,003471749 0,84966 NA NA  
0,69592196 0,0223 1,048262476 0,6784 NA NA  
1,194891205 0,01916 1,062159186 0,21659 NA NA  
0,70222438 0,02035 0,863938187 0,06614 NA NA  
1,296839555 0,00421 1,128182137 0,20426 NA NA  
1,190856849 0,04747 1,07997656 0,14574 NA NA  
1,958480595 0,00676 1,081474763 0,50568 NA NA  
1,25062303 0,04461 1,049319227 0,53899 NA NA  
1,546492675 0,0004 1,338855257 0,06617 NA NA  
0,675487042 0,03828 0,951318276 0,46678 NA NA  
0,732042848 0,02864 0,980099415 0,84235 NA NA  
1,186736798 0,04938 1,035264924 0,74394 NA NA  
1,398616083 0,00541 1,125838586 0,12509 NA NA  
1,2397077 0,01802 1,085229372 0,08115 NA NA  
0,684441907 0,03115 0,917004043 0,16374 NA NA  
1,282536603 0,04813 0,998614666 0,98137 NA NA  
0,793333843 0,0288 0,932386486 0,24729 NA NA  
1,25962998 0,01768 1,016774673 0,79505 NA NA  
1,176006737 0,04197 0,998614666 0,98104 NA NA  
1,295940965 0,02693 1,131314463 0,09136 NA NA  
0,736113431 0,03203 0,990342872 0,93315 NA NA  
1,230291345 0,03684 1,089752112 0,05254 NA NA  
0,815637493 0,02487 0,929804943 0,20829 NA NA  
1,23370717 0,02153 1,105730653 0,08079 NA NA  
1,236275261 0,02341 1,07997656 0,19513 NA NA  
1,261377409 0,00793 1,116512962 0,08123 NA NA  
1,25353302 0,0491 1,154285418 0,09762 NA NA  
1,38991822 0,0132 1,110338834 0,13501 NA NA  
0,782954296 0,00183 0,957271458 0,58114 NA NA  
1,271913007 0,01227 1,009051634 0,81072 NA NA

|              |         |             |         |    |    |
|--------------|---------|-------------|---------|----|----|
| 1.194991205  | 0.02396 | 1.077733145 | 0.17347 | NA | NA |
| 1.188383105  | 0.03978 | 1.110338834 | 0.0802  | NA | NA |
| 1.248330549  | 0.01956 | 1.040300267 | 0.58777 | NA | NA |
| 0.772175133  | 0.02915 | 0.934327347 | 0.29777 | NA | NA |
| 0.649769531  | 0.04026 | 0.869947353 | 0.15042 | NA | NA |
| 0.830470024  | 0.03434 | 0.966518189 | 0.44729 | NA | NA |
| 0.675955417  | 0.01793 | 0.868742185 | 0.10078 | NA | NA |
| 0.659296807  | 0.00861 | 0.853817714 | 0.11205 | NA | NA |
| 1.493813457  | 0.03738 | 0.920825697 | 0.43576 | NA | NA |
| 1.192508872  | 0.022   | 1.0181852   | 0.70013 | NA | NA |
| 0.584388624  | 0.01647 | 0.807201075 | 0.09948 | NA | NA |
| 0.754190038  | 0.04027 | 0.880869374 | 0.12209 | NA | NA |
| 1.273677475  | 0.048   | 1.065108203 | 0.52848 | NA | NA |
| 0.591725511  | 0.04277 | 0.938871747 | 0.40792 | NA | NA |
| 1.160703914  | 0.04717 | 1.061423209 | 0.23307 | NA | NA |
| 1.267512522  | 0.02566 | 1.147902414 | 0.07279 | NA | NA |
| 0.545631939  | 0.03659 | 0.938221197 | 0.63058 | NA | NA |
| 1.187559666  | 0.04534 | 1.038139271 | 0.33502 | NA | NA |
| 1.176906737  | 0.01927 | 1.030253954 | 0.56427 | NA | NA |
| 1.244874235  | 0.00768 | 1.129747215 | 0.07392 | NA | NA |
| 0.69923196   | 0.01053 | 0.879039561 | 0.09458 | NA | NA |
| 1.509932275  | 0.04527 | 1.270150983 | 0.15057 | NA | NA |
| 1.474269217  | 0.00715 | 0.974679631 | 0.646   | NA | NA |
| 0.749499801  | 0.00682 | 0.858656436 | 0.06349 | NA | NA |
| 1.213335356  | 0.02297 | 1           | 0.99976 | NA | NA |
| 1.20664392   | 0.03523 | 1.098854218 | 0.27741 | NA | NA |
| 1.257565994  | 0.03165 | 1.086929284 | 0.05523 | NA | NA |
| 0.67689314   | 0.00029 | 0.860496138 | 0.07114 | NA | NA |
| 1.332374825  | 0.00688 | 1.170398641 | 0.07616 | NA | NA |
| 2.142061646  | 0.00126 | 1.433955248 | 0.11411 | NA | NA |
| 1.491744027  | 0.0029  | 1.185092771 | 0.05376 | NA | NA |
| 1.420107359  | 0.0463  | 1.349102534 | 0.05148 | NA | NA |
| 1.836552325  | 0.02045 | 1.254402205 | 0.12063 | NA | NA |
| 1.266634254  | 0.01151 | 1.039579435 | 0.42121 | NA | NA |
| 0.741747467  | 0.00682 | 0.874784765 | 0.11781 | NA | NA |
| 1.223488041  | 0.00975 | 1.121166078 | 0.05423 | NA | NA |
| 0.687770909  | 0.02362 | 0.930496568 | 0.21912 | NA | NA |
| 1.188383105  | 0.04543 | 0.881459064 | 0.78774 | NA | NA |
| 1.204972315  | 0.04521 | 1.092777739 | 0.19991 | NA | NA |
| 0.816768991  | 0.03814 | 0.957271458 | 0.51963 | NA | NA |
| 1.28689247   | 0.01532 | 1.098854218 | 0.09591 | NA | NA |
| 0.777007269  | 0.02042 | 0.966606097 | 0.761   | NA | NA |
| 1.257013375  | 0.01131 | 1.028826708 | 0.55278 | NA | NA |
| 1.42296165   | 0.00679 | 1.112650121 | 0.06854 | NA | NA |
| 0.786217292  | 0.03858 | 0.955945318 | 0.4182  | NA | NA |
| 0.65747138   | 0.01837 | 0.852044095 | 0.23581 | NA | NA |
| 1.858321349  | 0.0058  | 1.197478705 | 0.10423 | NA | NA |
| 1.23370717   | 0.02893 | 0.990342872 | 0.89076 | NA | NA |
| 1.234562607  | 0.01227 | 1.016070143 | 0.77415 | NA | NA |
| 0.817335328  | 0.03082 | 0.863261894 | 0.58489 | NA | NA |
| 1.425037614  | 0.04927 | 1.049716684 | 0.65376 | NA | NA |
| 1.343503426  | 0.01035 | 1.143138335 | 0.12109 | NA | NA |
| 1.570256237  | 0.00262 | 1.181811547 | 0.10848 | NA | NA |
| 0.761292604  | 0.04323 | 0.881480158 | 0.15569 | NA | NA |
| 1.22684977   | 0.03234 | 0.979420298 | 0.67622 | NA | NA |
| 1.25353302   | 0.01071 | 1.006955555 | 0.89621 | NA | NA |
| 1.263127262  | 0.01633 | 0.957271458 | 0.44767 | NA | NA |
| 0.830470024  | 0.02279 | 0.910669834 | 0.19847 | NA | NA |
| 1.292352831  | 0.01009 | 1.044635763 | 0.2775  | NA | NA |
| 1.257013375  | 0.03559 | 1.107264584 | 0.07936 | NA | NA |
| 1.449468833  | 0.00454 | 1.170398641 | 0.22046 | NA | NA |
| 1.35754498   | 0.00657 | 1.091263877 | 0.11267 | NA | NA |
| 1.53049677   | 0.00018 | 1.142346247 | 0.14236 | NA | NA |
| 0.480297432  | 0.00825 | 0.745872013 | 0.05034 | NA | NA |
| 1.304050735  | 0.01195 | 1.07479892  | 0.83344 | NA | NA |
| 1.200803427  | 0.02886 | 1.091263877 | 0.10569 | NA | NA |
| 1.311302014  | 0.00098 | 1.082975046 | 0.22348 | NA | NA |
| 1.17772279   | 0.03298 | 1.025267238 | 0.67146 | NA | NA |
| 1.220946513  | 0.04024 | 1.058484395 | 0.32318 | NA | NA |
| 1.21167266   | 0.04049 | 1.141554707 | 0.05112 | NA | NA |
| 1.297738767  | 0.00932 | 1.108032348 | 0.07337 | NA | NA |
| 1.599020257  | 0.04769 | 1.070288698 | 0.32791 | NA | NA |
| 1.217566019  | 0.04358 | 1.007653376 | 0.89461 | NA | NA |
| 1.243149669  | 0.04221 | 1.022428531 | 0.64946 | NA | NA |
| 1.286097483  | 0.03176 | 1.076240125 | 0.13412 | NA | NA |
| 1.592176198  | 0.02422 | 0.990342872 | 0.91583 | NA | NA |
| 0.805524291  | 0.02234 | 0.952466223 | 0.21251 | NA | NA |
| 1.49484249   | 0.00474 | 1.142346247 | 0.08984 | NA | NA |
| 1.278985581  | 0.04921 | 1.111108729 | 0.06959 | NA | NA |
| 1.298638603  | 0.0068  | 1.114193651 | 0.10176 | NA | NA |
| 1.35284231   | 0.00662 | 1.0132569   | 0.83834 | NA | NA |
| 1.281547924  | 0.04078 | 1.041575343 | 0.94702 | NA | NA |
| 1.723092319  | 0.02233 | 1.060687741 | 0.42532 | NA | NA |
| 0.69640574   | 0.01028 | 0.892546971 | 0.06874 | NA | NA |
| 1.246601194  | 0.03016 | 1.041021598 | 0.50075 | NA | NA |
| 0.615572207  | 0.0374  | 0.955945318 | 0.72515 | NA | NA |
| 1.479387509  | 0.01915 | 1.11861851  | 0.21316 | NA | NA |
| 1.77393261   | 0.00186 | 1.178339408 | 0.06402 | NA | NA |
| 1.607701981  | 0.02307 | 1.065108203 | 0.39341 | NA | NA |
| 1.582274602  | 0.01563 | 1.098092814 | 0.39321 | NA | NA |
| 1.450952208  | 0.01019 | 1.101141598 | 0.12722 | NA | NA |
| 0.777546036  | 0.02208 | 0.880299014 | 0.05212 | NA | NA |
| 1.155886707  | 0.03897 | 1.024568233 | 0.67129 | NA | NA |
| 1.347233577  | 0.03364 | 1.07549439  | 0.38545 | NA | NA |
| 2.16449289   | 0.04697 | 1.267512522 | 0.15571 | NA | NA |
| 1.277213759  | 0.00468 | 0.934327347 | 0.30136 | NA | NA |
| 1.377450046  | 0.03306 | 1.169587664 | 0.06202 | NA | NA |
| 1.631274987  | 0.00011 | 1.178539408 | 0.09263 | NA | NA |
| 1.23945735   | 0.03559 | 1.036701101 | 0.60717 | NA | NA |
| 1.216722359  | 0.04466 | 1.021720083 | 0.60828 | NA | NA |
| 1.219255094  | 0.01261 | 1.02313747  | 0.55723 | NA | NA |
| 1.675974269  | 0.00163 | 1.094293701 | 0.27921 | NA | NA |
| 0.75345233   | 0.01063 | 0.962994443 | 0.63249 | NA | NA |
| 1.194991205  | 0.04575 | 0.988970916 | 0.77128 | NA | NA |
| 0.785128119  | 0.03045 | 0.853817714 | 0.07877 | NA | NA |
| 1.244011653  | 0.02694 | 1.006257823 | 0.88124 | NA | NA |
| 0.788946841  | 0.01481 | 0.852044095 | 0.05494 | NA | NA |
| 1.214194884  | 0.02852 | 1.093535457 | 0.07303 | NA | NA |
| 1.596596773  | 0.00841 | 1.114193651 | 0.3197  | NA | NA |
| 1.176091225  | 0.04035 | 1.068885991 | 0.1139  | NA | NA |
| 1.232852325  | 0.04792 | 1.070288698 | 0.26526 | NA | NA |
| 1.309485423  | 0.02184 | 1.051901779 | 0.28037 | NA | NA |
| 1.321338406  | 0.02497 | 1.07549439  | 0.21614 | NA | NA |
| 1.242288282  | 0.03248 | 1.076240125 | 0.15722 | NA | NA |
| 1.205807828  | 0.01929 | 1.076240125 | 0.1536  | NA | NA |
| 1.332374825  | 0.0422  | 1.132098902 | 0.10868 | NA | NA |
| 1.392811481  | 0.00697 | 1.189207115 | 0.14464 | NA | NA |
| 1.208317843  | 0.0149  | 1.098092814 | 0.05847 | NA | NA |
| 1.308578071  | 0.03908 | 1.071030823 | 0.3121  | NA | NA |
| 1.191582575  | 0.04114 | 1.040300267 | 0.5087  | NA | NA |
| 1.266634254  | 0.00239 | 1.192508872 | 0.05024 | NA | NA |
| 1.332374825  | 0.02589 | 1.0132569   | 0.80707 | NA | NA |
| 1.257884972  | 0.02945 | 1.069547088 | 0.10503 | NA | NA |
| 1.150291893  | 0.04071 | 1.07733145  | 0.09422 | NA | NA |
| 1.267565994  | 0.02678 | 1.043911927 | 0.34526 | NA | NA |
| 1.207480591  | 0.03707 | 1.02131747  | 0.61455 | NA | NA |
| 1.340712592  | 0.0074  | 1.021012126 | 0.7278  | NA | NA |
| 1.257013375  | 0.0159  | 0.991029563 | 0.89541 | NA | NA |
| 0.754190038  | 0.03048 | 0.90312651  | 0.18413 | NA | NA |
| 0.745355193  | 0.02742 | 0.90000193  | 0.15322 | NA | NA |
| 1.56265576   | 0.00623 | 1.11787138  | 0.06879 | NA | NA |
| 1.186736798  | 0.04004 | 1.059218335 | 0.29467 | NA | NA |
| 1.691144575  | 0.0377  | 1.20994089  | 0.14109 | NA | NA |
| 0.451563255  | 0.00351 | 0.90312651  | 0.33088 | NA | NA |
| 1.322254605  | 0.00639 | 1.0453601   | 0.54458 | NA | NA |
| 1.397646972  | 0.0292  | 1.194991205 | 0.06361 | NA | NA |
| 1.1744613971 | 0.03968 | 1.104064885 | 0.11937 | NA | NA |
| 0.866937564  | 0.04666 | 0.899378312 | 0.06208 | NA | NA |
| 1.276328769  | 0.027   | 1.092777739 | 0.09936 | NA | NA |
| 1.237132479  | 0.03492 | 1.054822317 | 0.32464 | NA | NA |
| 0.701735863  | 0.00022 | 0.912665489 | 0.31749 | NA | NA |
| 1.26252029   | 0.00059 | 1.066585781 | 0.4979  | NA | NA |
| 1.199139914  | 0.04642 | 1.07549439  | 0.15966 | NA | NA |
| 0.804966138  | 0.04841 | 0.945402117 | 0.24546 | NA | NA |
| 1.22858698   | 0.02945 | 1.111879158 | 0.12639 | NA | NA |
| 0.76154437   | 0.01043 | 0.923382311 | 0.234   | NA | NA |
| 0.704172113  | 0.00843 | 0.869388187 | 0.05148 | NA | NA |
| 0.787307977  | 0.02681 | 0.930496568 | 0.27261 | NA | NA |

|             |         |             |         |          |                                                                                     |
|-------------|---------|-------------|---------|----------|-------------------------------------------------------------------------------------|
| 1.268391399 | 0.02104 | 1.067325338 | 0.33581 | NA       | NA                                                                                  |
| 1.822602561 | 0.00942 | 1.114966219 | 0.25543 | NA       | NA                                                                                  |
| 0.778624691 | 0.04476 | 0.85027416  | 0.07919 | NA       | NA                                                                                  |
| 1.156688184 | 0.03709 | 1.040300267 | 0.4603  | NA       | NA                                                                                  |
| 0.714992493 | 0.03452 | 0.910388824 | 0.24448 | NA       | NA                                                                                  |
| 1.204137381 | 0.02791 | 1.012554807 | 0.68099 | NA       | NA                                                                                  |
| 1.780151467 | 0.04948 | 1.054822317 | 0.65495 | NA       | NA                                                                                  |
| 1.225185332 | 0.00865 | 1.014662547 | 0.77703 | NA       | NA                                                                                  |
| 0.722465199 | 0.03757 | 0.934975198 | 0.45717 | NA       | NA                                                                                  |
| 1.344434994 | 0.00552 | 1.110338834 | 0.06409 | NA       | NA                                                                                  |
| 1.208317843 | 0.02744 | 1.013231116 | 0.08117 | NA       | NA                                                                                  |
| 1.154285418 | 0.04789 | 1.070288698 | 0.16472 | NA       | NA                                                                                  |
| 1.188383105 | 0.03733 | 1.050444544 | 0.33087 | NA       | NA                                                                                  |
| 1.234562607 | 0.04695 | 1.122721422 | 0.06606 | NA       | NA                                                                                  |
| 1.442928687 | 0.03857 | 1.255271991 | 0.05275 | NA       | NA                                                                                  |
| 1.199971382 | 0.04612 | 0.893785162 | 0.06504 | NA       | NA                                                                                  |
| 0.729471077 | 0.00146 | 0.880869374 | 0.06187 | NA       | NA                                                                                  |
| 0.646624466 | 0.00754 | 0.818469182 | 0.08957 | NA       | NA                                                                                  |
| 2.474264957 | 0.00272 | 1.207480591 | 0.34881 | NA       | NA                                                                                  |
| 0.693034943 | 0.00113 | 0.862143545 | 0.10023 | NA       | NA                                                                                  |
| 1.378405153 | 0.01256 | 1.051172909 | 0.47766 | NA       | NA                                                                                  |
| 1.370782805 | 0.02216 | 1.024556823 | 0.63906 | NA       | NA                                                                                  |
| 0.802181166 | 0.03263 | 0.906261938 | 0.23425 | NA       | NA                                                                                  |
| 1.308578071 | 0.0203  | 0.990342872 | 0.87501 | NA       | NA                                                                                  |
| 1.209994089 | 0.03936 | 0.957271458 | 0.4946  | NA       | NA                                                                                  |
| 1.29738767  | 0.00802 | 1.048264276 | 0.5029  | NA       | NA                                                                                  |
| 0.859180755 | 0.03376 | 0.939522749 | 0.20224 | NA       | NA                                                                                  |
| 1.297738767 | 0.0395  | 0.959264119 | 0.38    | NA       | NA                                                                                  |
| 1.223488041 | 0.03807 | 1.067325338 | 0.21441 | NA       | NA                                                                                  |
| 1.351910833 | 0.01609 | 1.046810282 | 0.51129 | NA       | NA                                                                                  |
| 0.726986259 | 0.04679 | 0.909408252 | 0.13203 | NA       | NA                                                                                  |
| 1.407368375 | 0.02488 | 1.114966219 | 0.21256 | NA       | NA                                                                                  |
| 1.241140669 | 0.02226 | 0.957353218 | 0.60513 | NA       | NA                                                                                  |
| 1.42800398  | 0.0215  | 0.961260928 | 0.44313 | NA       | NA                                                                                  |
| 1.153485605 | 0.03362 | 1.025978145 | 0.70591 | NA       | NA                                                                                  |
| 1.193335743 | 0.04167 | 1.018891197 | 0.72761 | NA       | NA                                                                                  |
| 1.750782659 | 0.00511 | 1.202469249 | 0.05222 | NA       | NA                                                                                  |
| 1.153485605 | 0.04251 | 1.071302026 | 0.10529 | NA       | NA                                                                                  |
| 1.623379162 | 0.00222 | 1.041021598 | 0.70876 | NA       | NA                                                                                  |
| 1.32317144  | 0.01263 | 1.076240125 | 0.32584 | NA       | NA                                                                                  |
| 1.183451022 | 0.04347 | 1.092777739 | 0.21656 | NA       | NA                                                                                  |
| 1.222640278 | 0.02804 | 1.02313747  | 0.67741 | NA       | NA                                                                                  |
| 1.304954948 | 0.04227 | 1.183451022 | 0.18143 | NA       | NA                                                                                  |
| 1.175273238 | 0.04251 | 1.075494939 | 0.21768 | NA       | NA                                                                                  |
| 1.240567298 | 0.02749 | 1.067325338 | 0.37448 | NA       | NA                                                                                  |
| 1.592176198 | 0.00173 | 1.104198847 | 0.1919  | NA       | NA                                                                                  |
| 1.505246747 | 0.00366 | 1.185914499 | 0.10106 | NA       | NA                                                                                  |
| 0.731028724 | 0.0168  | 0.953298545 | 0.58407 | NA       | NA                                                                                  |
| 0.750101495 | 0.02121 | 0.981480158 | 0.29329 | NAB1     | NGF-A binding protein 1 [EGR1 binding protein 1]                                    |
| 2.550744828 | 0.03945 | 1.113236644 | 0.07341 | NAMPT    | nicotinamide phosphoribosyltransferase                                              |
| 1.234562607 | 0.03178 | 1.038139271 | 0.40951 | NANOS2   | nanos homolog 2 (Drosophila)                                                        |
| 0.747424624 | 0.03848 | 0.910669834 | 0.09549 | NAP1L1   | nucleosome assembly protein 1-like 1                                                |
| 0.851281119 | 0.04353 | 0.972654947 | 0.70096 | NAPLEPD  | N-acyl phosphatidylethanolamine phospholipase D                                     |
| 1.470187336 | 0.0146  | 1.122721422 | 0.15864 | NAP5B    | napsin B aspartic peptidase pseudogenase                                            |
| 0.575544746 | 0.00614 | 0.971154192 | 0.1232  | NBEAL2   | neurabin-like 2                                                                     |
| 1.356604327 | 0.00614 | 1.132098902 | 0.15984 | NCAM1    | neuronal cell adhesion molecule 1                                                   |
| 1.186736798 | 0.04869 | 0.983502074 | 0.8312  | NCAN     | neurocan                                                                            |
| 0.706616822 | 0.04092 | 0.920825697 | 0.2434  | NCOA1    | nuclear receptor coactivator 1                                                      |
| 0.710053679 | 0.02022 | 0.911933166 | 0.32486 | NCOR1    | nuclear receptor corepressor 1                                                      |
| 1.241473735 | 0.02145 | 0.97179692  | 0.76872 | NDFIP1   | Nedd4 family interacting protein 1                                                  |
| 1.209155676 | 0.03934 | 1.008352455 | 0.89787 | NDP      | Notre disease (neurodegloma)                                                        |
| 1.178539408 | 0.03096 | 1.041021598 | 0.5643  | NDS1     | N-deacetylase/N-sulfotransferase (heparan glucosaminyl) 1                           |
| 0.514770042 | 0.01162 | 0.7944344   | 0.10608 | NDUFA4L2 | NADH dehydrogenase (ubiquinone) 1 alpha subcomplex, 4-like 2                        |
| 0.78946841  | 0.04276 | 0.974004269 | 0.5618  | NDUFS2   | NADH dehydrogenase (ubiquinone) Fe-S protein 2, 49kDa (NADH-coenzyme Q reductase)   |
| 0.808320869 | 0.0293  | 1.066285625 | 0.30212 | NEK6     | NIMA (never in mitosis gene a)-related kinase 6                                     |
| 1.200803427 | 0.04985 | 1.117391558 | 0.16529 | NEF      | neurofilin neurotrophic factor                                                      |
| 0.692074858 | 0.00463 | 0.925304428 | 0.22841 | NEO1     | neogenin 1                                                                          |
| 1.237132479 | 0.02134 | 1.110338834 | 0.11124 | NEU3     | sialidase 3 (membrane sialidase)                                                    |
| 1.199971382 | 0.04745 | 1.021720083 | 0.62915 | NFIB     | nuclear factor I/B                                                                  |
| 0.747424624 | 0.04867 | 0.830470024 | 0.06882 | NFIC     | nuclear factor I/C (CCAAT-binding transcription factor)                             |
| 0.546524465 | 0.0211  | 1.133791936 | 0.0622  | NFIX     | nuclear factor I/X (CCAAT-binding transcription factor)                             |
| 0.771105413 | 0.04886 | 0.94342121  | 0.47505 | NFK1     | nuclear transcription factor, X-box binding 1                                       |
| 0.748461493 | 0.03027 | 0.899378312 | 0.17377 | NFYA     | nuclear transcription factor Y, alpha                                               |
| 1.798756624 | 0.01735 | 1.311302014 | 0.05874 | NID2     | nidogen 2 (osteonidogen)                                                            |
| 0.760489377 | 0.03206 | 0.852634892 | 0.14804 | NIPAL2   | NIPA-like domain containing 2                                                       |
| 1.06542257  | 0.04411 | 1.090001193 | 0.16213 | NIPAL3   | NIPA-like domain containing 3                                                       |
| 0.771924937 | 0.04016 | 0.989751127 | 0.16025 | NLR1     | neurysin (metallopeptidase M13 family)                                              |
| 0.695440986 | 0.01812 | 0.925946023 | 0.23104 | NLRP1    | NLR family, pyrin domain containing 1                                               |
| 1.379360922 | 0.01726 | 1.086734863 | 0.28682 | NLRP3    | NLR family, pyrin domain containing 3                                               |
| 0.638164384 | 0.00352 | 0.889458994 | 0.10094 | NLRX1    | NLR family member X1                                                                |
| 0.786762445 | 0.03855 | 0.887611337 | 0.36718 | NMD3     | NMD3 homolog (S. cerevisiae)                                                        |
| 0.712518807 | 0.00249 | 0.943264746 | 0.07851 | NOD3     | nuclear protein 3 (apoptosis repressor with CARD domain)                            |
| 0.754190038 | 0.03196 | 0.867538687 | 0.16972 | NOLC1    | nuclear and colloid-body phosphoprotein 1                                           |
| 0.791688866 | 0.04176 | 0.972654947 | 0.62548 | NOS1     | nitric oxide synthase 1 (neuronal)                                                  |
| 1.151089491 | 0.04784 | 0.973329374 | 0.44183 | NPP1P    | nephronophthisis 1 (juvenile)                                                       |
| 0.541862983 | 0.00841 | 0.910669834 | 0.30449 | NPP3P    | nephronophthisis 3 (adolescent)                                                     |
| 1.366040257 | 0.02643 | 1.179565692 | 0.09115 | NPL      | N-acetylneuraminyl pyruvate lyase (dihydrodipicolinate synthase)                    |
| 0.652021368 | 0.00118 | 0.914507653 | 0.07787 | NPB3     | nitric peptide receptor C/guanylate cyclase C (nitroantriacetic peptide receptor C) |
| 1.544530266 | 0.019   | 1.09569472  | 0.09263 | NPTX2    | neuronal pentraxin II                                                               |
| 1.170222284 | 0.0357  | 0.991716731 | 0.84018 | NR1H4    | nuclear receptor subfamily 1, group H, member 4                                     |
| 0.782954296 | 0.01623 | 0.965267025 | 0.46907 | NR2C2AP  | nuclear receptor 2C2-associated protein                                             |
| 1.33885257  | 0.03437 | 1.31321125  | 0.08546 | NR2F2    | nuclear receptor subfamily 2, group F, member 2                                     |
| 0.633804117 | 0.00988 | 1.293248932 | 0.08666 | NR2F2    | nuclear receptor subfamily 2, group F, member 2                                     |
| 1.575707772 | 0.04764 | 1.046810282 | 0.50259 | NR2F2    | nuclear receptor subfamily 2, group F, member 2                                     |
| 1.80000386  | 0.0448  | 1.35846285  | 0.25238 | NR4A2    | nuclear receptor subfamily 4, group A, member 2                                     |
| 1.939777239 | 0.00395 | 1.121166078 | 0.08773 | NR6A1    | nuclear receptor subfamily 6, group A, member 1                                     |
| 1.178539408 | 0.03004 | 1.071030823 | 0.24378 | NRG1     | neuregulin 1                                                                        |
| 1.236275261 | 0.04093 | 0.97260286  | 0.1322  | NRP2     | neuropilin 2                                                                        |
| 1.381274448 | 0.00178 | 1.011152081 | 0.87945 | NSD1     | nuclear receptor binding SET domain protein 1                                       |
| 1.193335743 | 0.04001 | 1.020304659 | 0.17152 | NSL1     | NSL1, MIND kinetochore complex component, homolog (S. cerevisiae)                   |
| 1.380317353 | 0.01838 | 1.038139271 | 0.69015 | NTSC2    | 5'-nucleotidase, cytosolic II                                                       |
| 1.399585866 | 0.02557 | 0.942784536 | 0.31868 | NTSE     | 5'-nucleotidase, ecto (CD73)                                                        |
| 1.32408891  | 0.00985 | 1.056285625 | 0.44464 | NTSE     | 5'-nucleotidase, ecto (CD73)                                                        |
| 1.268391399 | 0.04766 | 0.914507653 | 0.7874  | NTRK3    | neurotrophic tyrosine kinase, receptor, type 3                                      |
| 1.304954948 | 0.0249  | 1.154285418 | 0.07829 | NTRK3    | neurotrophic tyrosine kinase, receptor, type 3                                      |
| 1.286989247 | 0.04119 | 1.095811766 | 0.1881  | NTRK3    | neurotrophic tyrosine kinase, receptor, type 3                                      |
| 1.207480591 | 0.04334 | 1.106497353 | 0.30415 | NUDT18   | nudix (nucleoside diphosphate linked moiety X)-type motif 18                        |
| 0.60514542  | 0.00586 | 0.825305409 | 0.33769 | NUDT21   | nudix (nucleoside diphosphate linked moiety X)-type motif 21                        |
| 1.373635233 | 0.02504 | 1.128864405 | 0.10159 | NUDT4    | nudix (nucleoside diphosphate linked moiety X)-type motif 4                         |
| 1.343503426 | 0.04061 | 1.132098902 | 0.1652  | NUDT4    | nudix (nucleoside diphosphate linked moiety X)-type motif 4                         |
| 0.717474767 | 0.0153  | 0.944092419 | 0.22968 | NUDT5    | nudix (nucleoside diphosphate linked moiety X)-type motif 5                         |
| 1.271913007 | 0.03231 | 0.963261894 | 0.64635 | NUDT6    | nudix (nucleoside diphosphate linked moiety X)-type motif 6                         |
| 1.384149716 | 0.00918 | 1.079228237 | 0.15246 | NUP210   | nucleoporin 210kDa                                                                  |
| 0.75039549  | 0.01633 | 0.900001193 | 0.05013 | NUP85    | nucleoporin 85kDa                                                                   |
| 0.524858342 | 0.02033 | 0.913276152 | 0.23033 | NUSAP1   | nuclear and spindle associated protein 1                                            |
| 1.195819797 | 0.02986 | 1.068805991 | 0.29625 | NXPX2    | neuraxophilin 2                                                                     |
| 1.33298677  | 0.04135 | 1.199139914 | 0.05543 | OASL     | 2'-5'-oligoadenylate synthetase-like                                                |
| 0.83931044  | 0.03498 | 0.95929261  | 0.49864 | OBSN     | obscurin, cytoskeletal calmodulin and titin-interacting RhoGEF                      |
| 1.236275261 | 0.03222 | 1.151089491 | 0.05913 | OBSL1    | obscurin-like 1                                                                     |
| 0.802737389 | 0.04237 | 0.94348251  | 0.49091 | OCL2     | oculocutaneous albinism II                                                          |
| 0.798298386 | 0.04159 | 0.963261894 | 0.57671 | OCLAD1   | OCLAD domain containing 1                                                           |
| 1.205807828 | 0.04478 | 1.084477409 | 0.13452 | ODF3B    | outer dense fiber of sperm tails 3B                                                 |
| 0.683493726 | 0.01462 | 0.927873476 | 0.28886 | ODGD     | oxoglutarate (alpha-ketoglutarate) dehydrogenase (lipamide)                         |
| 1.28877463  | 0.04011 | 1.062159186 | 0.27099 | OFOD1    | 2-oxoglutarate and iron-dependent oxygenase domain containing 1                     |
| 1.197478705 | 0.04051 | 1.101905116 | 0.08649 | OLR1     | oxidized low density lipoprotein (lectin-like) receptor 1                           |
| 1.278985581 | 0.01548 | 1.134455485 | 0.06381 | OMG      | oligodendrocyte myelin glycoprotein                                                 |
| 1.258757174 | 0.03141 | 1.111897158 | 0.11264 | OPCLM    | opioid binding protein/cell adhesion molecule-like                                  |
| 0.75039549  | 0.03683 | 0.864537231 | 0.05247 | OPLAH    | 5-oxoprolinase (ATP-hydrolysing)                                                    |
| 1.212512819 | 0.02795 | 1.078480432 | 0.26427 | OR7E47P  | olfactory receptor, family 7, subfamily E, member 47 pseudogene                     |
| 1.277213759 | 0.03878 | 1.054091423 | 0.25782 | ORM1     | orosomucoid 1                                                                       |
| 0.723677475 | 0.01257 | 1.013016116 | 0.16719 | OSBP1D   | oxysterol binding protein-like 10                                                   |
| 0.704172113 | 0.00509 | 0.912565489 | 0.10208 | OSBP2    | oxysterol binding protein-like 2                                                    |
| 0.68491649  | 0.0027  | 0.888842681 | 0.09264 | OVOL2    | ovo-like 2 (Drosophila)                                                             |
| 1.293248932 | 0.00989 | 1.091263877 | 0.07506 | OVOL3    | ovo-like 3 (Drosophila)                                                             |
| 0.71151731  | 0.00935 | 0.89564567  | 0.09381 | P2RX7    | purinergic receptor P2X, ligand-gated ion channel, 7                                |
| 1.561572985 | 0.0036  | 1.246601194 | 0.06926 | P2RY10   | purinergic receptor P2Y, G-protein coupled, 10                                      |
| 1.264003098 | 0.03895 | 1.017479992 | 0.263   | PAD6     | protein kinase C and casein kinase substrate in neurons 1                           |
| 1.235003785 | 0.02498 | 1.105730653 | 0.19494 | PAD6     | polyamine oxidase (exo-N4-amino)                                                    |
| 1.776453592 | 0.01561 | 1.181811547 | 0.32695 | PAPPA    | pregnancy-associated plasma protein A, pappalysin 1                                 |
| 1.80125196  | 0.04327 | 1.283425898 | 0.10767 | PAPPA    | pregnancy-associated plasma protein A, pappalysin 1                                 |
| 0.768437591 | 0.03392 | 0.868140228 | 0.10644 | PAQR7    | progesterin and adipoQ receptor family member VII                                   |
| 1.20664392  | 0.02942 | 1.139183377 | 0.05013 | PAGR8    | progesterin and adipoQ receptor family member VIII                                  |
| 1.286989247 | 0.04943 | 1.119612889 | 0.15716 | PARP15   | poly (ADP-ribose) polymerase family, member 15                                      |

|             |         |             |         |           |                                                                                         |
|-------------|---------|-------------|---------|-----------|-----------------------------------------------------------------------------------------|
| 1.56049096  | 0.00372 | 1.085229372 | 0.23604 | PASK      | PAS domain containing serine/threonine kinase                                           |
| 1.2397077   | 0.00521 | 1.051901779 | 0.32823 | PAX2      | paired box 2                                                                            |
| 1.154285418 | 0.03969 | 1.061423209 | 0.18204 | PAX3      | paired box 3                                                                            |
| 1.783857039 | 0.00008 | 1.257884972 | 0.05994 | PAX5      | paired box 5                                                                            |
| 0.714992493 | 0.01641 | 1.105730653 | 0.36652 | PBRM1     | polybromo 1                                                                             |
| 1.308578071 | 0.03188 | 1.148698355 | 0.05306 | PBX2      | pre-B cell leukemia homeobox 2                                                          |
| 1.231998073 | 0.02925 | 1.092020546 | 0.07539 | PCBP1-AS1 | PCBP1 antisense RNA 1 (non-protein coding)                                              |
| 1.398616083 | 0.03751 | 0.980099415 | 0.76051 | PCDH4     | protocadherin beta 4                                                                    |
| 1.835658184 | 0.03867 | 0.918276162 | 0.08517 | PCGF1     | polycomb group ring finger 1                                                            |
| 1.366040257 | 0.00619 | 1.105730653 | 0.10295 | PCGF5     | polycomb group ring finger 5                                                            |
| 0.802181166 | 0.04622 | 1.011919525 | 0.18517 | PCID2     | PC domain containing 2                                                                  |
| 1.257884972 | 0.03913 | 0.980099415 | 0.62026 | PCIF1     | PDI C-terminal inhibiting factor 1                                                      |
| 1.40768375  | 0.02693 | 1.068065408 | 0.35634 | PCMTD1    | protein-L-isopartate (D-aspartate) O-methyltransferase domain containing 1              |
| 1.337927555 | 0.00546 | 1.125838586 | 0.27084 | PCTP      | phosphatidylcholine transfer protein                                                    |
| 1.29738767  | 0.02687 | 1.083725967 | 0.31121 | PCYT2     | phosphate cytidylyltransferase 2, ethanalamine                                          |
| 0.595015848 | 0.02247 | 0.817602059 | 0.24215 | PDCD4     | programmed cell death 4 (neoplastic transformation inhibitor)                           |
| 0.46593243  | 0.01547 | 0.715984371 | 0.22599 | PDCD4     | programmed cell death 4 (neoplastic transformation inhibitor)                           |
| 0.631126016 | 0.01135 | 0.843231111 | 0.05173 | PDCD6IP   | programmed cell death 6 interacting protein                                             |
| 1.277213759 | 0.00353 | 1.079976556 | 0.10522 | PD4D      | phosphodiesterase 4D, cAMP-specific                                                     |
| 0.579549796 | 0.02557 | 0.840896415 | 0.34667 | PDGFC     | platelet derived growth factor C                                                        |
| 1.745156479 | 0.01054 | 1.231144413 | 0.06419 | PK04      | pyruvate dehydrogenase kinase, isozyme 4                                                |
| 0.513442489 | 0.03925 | 0.826450315 | 0.33101 | PDLM5     | PDZ and LIM domain 5                                                                    |
| 0.52268005  | 0.00397 | 0.784584098 | 0.05511 | PDLM5     | PDZ and LIM domain 5                                                                    |
| 1.35754498  | 0.04204 | 1.047536127 | 0.46722 | PDXK      | pyridoxal (pyridoxine, vitamin B6) kinase                                               |
| 1.268391399 | 0.04161 | 1.089752112 | 0.08973 | PDXK      | pyridoxal (pyridoxine, vitamin B6) kinase                                               |
| 0.636397468 | 0.03441 | 0.844896384 | 0.09617 | PEBP1     | phosphatidylinositol binding protein 1                                                  |
| 0.675487042 | 0.02309 | 0.866338686 | 0.11086 | PEFN2     | peffoldin subunit 2                                                                     |
| 0.750184995 | 0.01511 | 1.021021216 | 0.7184  | PGAP2     | post-GPI attachment to proteins 2                                                       |
| 1.341642225 | 0.00925 | 1.043011927 | 0.41424 | PGLS      | 6-phosphogluconolactonase                                                               |
| 1.306765254 | 0.01203 | 1.123499903 | 0.08594 | PGR       | progesterone receptor                                                                   |
| 0.701738863 | 0.04465 | 0.903752727 | 0.19285 | PHACTR2   | phosphatase and actin regulator 2                                                       |
| 1.204972315 | 0.02125 | 1.026689546 | 0.50161 | PHEX      | phosphate regulating endopeptidase homolog, X-linked                                    |
| 0.770571108 | 0.04545 | 0.829358233 | 0.33093 | PHK2      | phosphorylase kinase, alpha 2 (liver)                                                   |
| 0.588045625 | 0.04252 | 0.885767519 | 0.09747 | PHK8      | phosphorylase kinase, beta                                                              |
| 2.087823855 | 0.00205 | 1.205807828 | 0.21809 | PHLDA1    | pleckstrin homology-like domain, family A, member 1                                     |
| 1.634670657 | 0.04072 | 1.182631    | 0.22557 | PHLDA1    | pleckstrin homology-like domain, family A, member 1                                     |
| 1.363030069 | 0.04195 | 1.172834949 | 0.12948 | PHLDA1    | pleckstrin homology-like domain, family A, member 1                                     |
| 0.534635443 | 0.02029 | 0.883205205 | 0.43463 | PHLDB3    | pleckstrin homology-like domain, family B, member 3                                     |
| 1.171210181 | 0.03523 | 0.961927455 | 0.42099 | PHOX2B    | paired-like homeobox 2b                                                                 |
| 0.698823486 | 0.04832 | 0.918912883 | 0.29285 | PHYHD1    | phytanoyl-CoA dioxygenase domain containing 1                                           |
| 2.18105465  | 0.00514 | 1.409320755 | 0.06477 | PHI5      | peptidase inhibitor 15                                                                  |
| 0.418993567 | 0.0485  | 0.902500727 | 0.64873 | PI3       | peptidase inhibitor 3, skin-derived                                                     |
| 1.257013375 | 0.04607 | 1.097319398 | 0.07698 | PIEZO2    | piezo-type mechanosensitive ion channel component 2                                     |
| 1.382323207 | 0.0174  | 1.114193651 | 0.24078 | PIEZO2    | piezo-type mechanosensitive ion channel component 2                                     |
| 1.584466622 | 0.04012 | 1.174461971 | 0.05454 | PIGK      | phosphatidylinositol glycan anchor biosynthesis, class K                                |
| 1.270150983 | 0.00306 | 1.063632673 | 0.214   | PIGP      | phosphatidylinositol glycan anchor biosynthesis, class P                                |
| 1.22603486  | 0.02811 | 1.113421618 | 0.2398  | PIK3CG    | phosphoinositide 3-kinase, catalytic, gamma polypeptide                                 |
| 1.210333084 | 0.02701 | 1.003471749 | 0.94014 | PIPSK1B   | phosphatidylinositol-4-phosphate 5-kinase, type I, beta                                 |
| 0.613444489 | 0.02597 | 0.783497187 | 0.11085 | PIPND1    | PI3H (C-terminal proteasome-interacting domain of thioridoxin-like) domain containing 1 |
| 0.363202607 | 0.02029 | 0.987068981 | 0.84109 | PIPTN1    | phosphatidylinositol transfer protein, cytoplasmic 1                                    |
| 1.244011653 | 0.01099 | 1.071030823 | 0.22918 | PIPTNM2   | phosphatidylinositol transfer protein, membrane-associated 2                            |
| 1.277131759 | 0.01733 | 1.114193651 | 0.27005 | PKDCC     | protein kinase domain containing, cytoplasmic homolog (mouse)                           |
| 0.530343871 | 0.02848 | 0.776488875 | 0.09613 | PKP1      | plakophilin 1 (ectodermal dysplasia/skin fragility syndrome)                            |
| 0.776468875 | 0.04874 | 0.976031761 | 0.72884 | PLA2G12A  | phospholipase A2, group XIIA                                                            |
| 1.2397077   | 0.01038 | 0.920205446 | 0.37659 | PLA2GA    | phospholipase A2, group IIA (platelets, synovial fluid)                                 |
| 0.585605091 | 0.01362 | 0.880259014 | 0.15176 | PLAC2     | placenta-specific 2 (non-protein coding)                                                |
| 1.425037614 | 0.04259 | 1.271913007 | 0.0695  | PLAUR     | plasminogen activator, urokinase receptor                                               |
| 1.269270886 | 0.03843 | 1.095052471 | 0.1521  | PLAUR     | plasminogen activator, urokinase receptor                                               |
| 0.581157054 | 0.02641 | 0.856188285 | 0.13181 | PLB01     | phospholipase B domain containing 1                                                     |
| 0.696462574 | 0.0108  | 0.896450315 | 0.13304 | PLCD1     | phospholipase C, delta 1                                                                |
| 0.832757771 | 0.02625 | 1.100378609 | 0.16314 | PLCD3     | phospholipase C, delta 3                                                                |
| 0.796880899 | 0.01939 | 1.076240125 | 0.45983 | PLCD4     | phospholipase C, delta 4                                                                |
| 1.205807828 | 0.03665 | 1.076986376 | 0.12232 | PLCG2     | phospholipase C, gamma 2 (phosphatidylinositol-specific)                                |
| 1.196648963 | 0.04022 | 1.073260286 | 0.0657  | PLCH1     | phospholipase C, eta 1                                                                  |
| 1.314031627 | 0.04029 | 1.100378609 | 0.0964  | PLCL2     | phospholipase C-like 2                                                                  |
| 1.286982447 | 0.00514 | 0.820561732 | 0.05207 | PLCZ2     | phosphatidylinositol-specific phospholipase C, X domain containing 2                    |
| 1.32408891  | 0.01289 | 1.082224645 | 0.27562 | PLD4      | phospholipase D family, member 4                                                        |
| 1.232852325 | 0.02239 | 1.125838586 | 0.0862  | PLEKH1    | pleckstrin homology domain containing, family B (evectins) member 1                     |
| 0.759435845 | 0.04917 | 0.951318276 | 0.51132 | PLEKH6    | pleckstrin homology domain containing, family G (with RhoGEF domain) member 6           |
| 0.712518807 | 0.03918 | 1.073400443 | 0.21548 | PLEKH2    | pleckstrin homology domain containing, family M (with RUN domain) member 2              |
| 1.454980884 | 0.00234 | 1.103705841 | 0.0517  | PLN2      | pleckstrin 2                                                                            |
| 0.842062954 | 0.04945 | 0.92404375  | 0.90048 | PLK4      | polo-like kinase 4                                                                      |
| 0.709070018 | 0.04587 | 0.915733686 | 0.11628 | PLP2      | proteolipid protein 2 (colonic epithelium-enriched)                                     |
| 1.29145735  | 0.00689 | 1.097331938 | 0.41603 | PLSCR1    | phospholipid scramblase 1                                                               |
| 1.831622098 | 0.02698 | 0.956608158 | 0.33572 | PLSCR3    | phospholipid scramblase 3                                                               |
| 0.585605091 | 0.0359  | 0.890692901 | 0.17607 | PLMB1     | plexin B1                                                                               |
| 0.575943821 | 0.00313 | 0.810256112 | 0.13599 | PMLL      | promyelomonocyte protein                                                                |
| 1.354724977 | 0.01808 | 1.096571589 | 0.09854 | PML       | promyelocytic leukemia                                                                  |
| 0.627201102 | 0.03784 | 1.006257823 | 0.92845 | PMM1      | phosphomannomutase 1                                                                    |
| 0.713507253 | 0.01121 | 1.095811766 | 0.29088 | PNISR     | PNN-interacting serine/arginine-rich protein                                            |
| 1.208317843 | 0.02244 | 0.915366101 | 0.77977 | PODN      | podocan                                                                                 |
| 0.706127202 | 0.00525 | 0.927230546 | 0.15005 | POGLUT1   | protein O-glucosyltransferase 1                                                         |
| 0.872362706 | 0.04446 | 0.985549337 | 0.78208 | POLR2G    | polymerase (RNA) II (DNA directed) polypeptide G                                        |
| 0.711531731 | 0.03117 | 0.890692901 | 0.14255 | POLR3K    | polymerase (RNA) III (DNA directed) polypeptide K, 12.3 kDa                             |
| 0.780786493 | 0.04663 | 0.923382311 | 0.08149 | POMP      | proteasome maturation protein                                                           |
| 1.26503392  | 0.01607 | 1.111108729 | 0.07975 | POU2F1    | POU class 2 homeobox 1                                                                  |
| 1.44949683  | 0.01376 | 1.118837101 | 0.18629 | POU1F1    | POU class 6 homeobox 1                                                                  |
| 0.647521499 | 0.01726 | 0.917040443 | 0.30306 | PPAP2C    | phosphatidic acid phosphatase type 2C                                                   |
| 0.679714121 | 0.0224  | 0.920187651 | 0.08244 | PP1A      | peptidylprolyl isomerase A (cyclophilin A)                                              |
| 0.65747138  | 0.03473 | 0.922742493 | 0.05125 | PP1A      | peptidylprolyl isomerase A (cyclophilin A)                                              |
| 0.66711585  | 0.03832 | 0.925304428 | 0.06455 | PP1A      | peptidylprolyl isomerase A (cyclophilin A)                                              |
| 0.648319301 | 0.03086 | 0.833231044 | 0.05779 | PP1C      | peptidylprolyl isomerase C (cyclophilin C)                                              |
| 0.681129017 | 0.01246 | 0.922742493 | 0.25048 | PP1D      | peptidylprolyl isomerase D                                                              |
| 1.278099363 | 0.03574 | 1.164733586 | 0.11823 | PPM1F     | protein phosphatase, Mg <sup>2+</sup> /Mn <sup>2+</sup> dependent, 1F                   |
| 0.613867842 | 0.0124  | 0.959929261 | 0.67739 | PPP1R16A  | protein phosphatase 1, regulatory (inhibitor) subunit 16A                               |
| 0.725476104 | 0.01505 | 0.851453708 | 0.05186 | PPP2CA    | protein phosphatase 2, regulatory subunit, alpha isozyme                                |
| 0.622437118 | 0.00161 | 0.899250701 | 0.17601 | PPP2R2C   | protein phosphatase 2, regulatory subunit B, gamma                                      |
| 1.367935304 | 0.00313 | 1.033114388 | 0.60043 | PPP2R5C   | protein phosphatase 2, regulatory subunit B', gamma                                     |
| 1.150909592 | 0.04858 | 1.036701101 | 0.36531 | PPP4R1L   | protein phosphatase 4, regulatory subunit 1-like                                        |
| 1.257013375 | 0.01265 | 1.172834949 | 0.06364 | PPY       | pancreatic polypeptide                                                                  |
| 1.347233753 | 0.03827 | 1.144724161 | 0.05317 | PQLC3     | PQ loop repeat containing 3                                                             |
| 0.705679322 | 0.02064 | 0.976031761 | 0.71619 | PRC1      | protein regulator of cytokinesis 1                                                      |
| 1.633537982 | 0.00129 | 1.130330567 | 0.26128 | PRDM1     | PR domain containing 1, with ZNF domain                                                 |
| 0.62546454  | 0.04351 | 1.016707143 | 0.8394  | PRDX1     | peroxiredoxin 1                                                                         |
| 1.342572503 | 0.02028 | 1.094293701 | 0.171   | PRH1      | proline-rich protein Haell1 subfamily 1                                                 |
| 0.693515485 | 0.00391 | 0.910669834 | 0.14831 | PRICKLE2  | prickle homolog 2 (Drosophila)                                                          |
| 1.380317353 | 0.0261  | 1.217566019 | 0.08847 | PRKACA    | protein kinase, cAMP-dependent, catalytic, alpha                                        |
| 1.238848698 | 0.01697 | 1.051301779 | 0.26759 | PRKACA    | protein kinase, cAMP-dependent, catalytic, alpha                                        |
| 1.871246996 | 0.01798 | 1.157490217 | 0.2027  | PRKACB    | protein kinase, cAMP-dependent, regulatory, type II, beta                               |
| 1.17772279  | 0.04959 | 1.057018041 | 0.35188 | PRKCB     | protein kinase C, beta                                                                  |
| 0.78132788  | 0.00624 | 0.920187651 | 0.08493 | PRLR      | prolactin receptor                                                                      |
| 0.670821112 | 0.03281 | 0.90062598  | 0.07882 | PRMT2     | protein arginine methyltransferase 2                                                    |
| 0.76101669  | 0.04337 | 0.874784765 | 0.09874 | PRPF38A   | PRP38 pre-mRNA processing factor 38 (yeast) domain containing A                         |
| 1.19648963  | 0.01718 | 1.082075046 | 0.15454 | PRPH2     | peripherin 2 (retinal degeneration, slow)                                               |
| 1.444930398 | 0.01799 | 1.049716684 | 0.4072  | PRSS16    | protease, serine, 16 (thymus)                                                           |
| 0.574747424 | 0.01842 | 0.955945318 | 0.65209 | PRSS8     | protease, serine, 8                                                                     |
| 1.28788163  | 0.0109  | 1.158292806 | 0.06008 | PRX       | periaxin                                                                                |
| 1.274560627 | 0.01514 | 0.974679631 | 0.64176 | PSEN2     | presenilin 2 (Alzheimer disease 4)                                                      |
| 0.81657493  | 0.00235 | 0.900001193 | 0.05659 | PSMA1     | proteasome (prosome, macropain) subunit, alpha type, 1                                  |
| 0.513344773 | 0.00721 | 0.900001193 | 0.444   | PSORS1C2  | psoriasis susceptibility 1 candidate 2                                                  |
| 1.240567298 | 0.04347 | 1.085229372 | 0.17867 | PSPC1     | paraspeckle component 1                                                                 |
| 0.804408371 | 0.00823 | 1.039579435 | 0.60744 | PTGER3    | prostaglandin E receptor 3 (subtype EP3)                                                |
| 0.753667455 | 0.01126 | 0.878430468 | 0.12221 | PTGER3    | prostaglandin E receptor 3 (subtype EP3)                                                |
| 0.697371833 | 0.01722 | 0.885153765 | 0.05678 | PTGERN    | prostaglandin F2 receptor negative regulator                                            |
| 1.693893929 | 0.00625 | 1.136074078 | 0.05634 | PTGS2     | prostaglandin-endoperoxide synthase 2 (prostaglandin G/H synthase and cyclooxygenase)   |
| 2.386671486 | 0.00281 | 1.193335743 | 0.42447 | PTGS2     | prostaglandin-endoperoxide synthase 2 (prostaglandin G/H synthase and cyclooxygenase)   |
| 0.76154437  | 0.02764 | 0.878430468 | 0.09366 | PTK6      | PTK6 protein tyrosine kinase 6                                                          |
| 0.72471077  | 0.02829 | 0.851453708 | 0.11051 | PTP4A1    | protein tyrosine phosphatase type IVA, member 1                                         |
| 1.301471449 | 0.02276 | 1.057018041 | 0.41729 | PTPDC1    | protein tyrosine phosphatase domain containing 1                                        |
| 0.785572517 | 0.00425 | 0.899783212 | 0.1779  | PTPN21    | protein tyrosine phosphatase, non-receptor type 21                                      |
| 0.608783000 | 0.04008 | 0.793333843 | 0.07513 | PTPN3     | protein tyrosine phosphatase, non-receptor type 3                                       |
| 1.502119927 | 0.03364 | 1.004167543 | 0.96245 | PTPRD     | protein tyrosine phosphatase, receptor type D                                           |
| 0.778085177 | 0.03413 | 1.040300267 | 0.48039 | PTTG1     | pituitary tumor-transforming 1                                                          |
| 1.411275843 | 0.01053 | 1.21167266  | 0.06155 | PHH1N1    | pyrin and HIN domain family, member 1                                                   |
| 0.678302164 | 0.02452 | 0.812815602 | 0.08762 | QSER1     | glutamine and serine rich 1                                                             |
| 1.17935932  | 0.04067 | 1.092592574 | 0.27074 | RAB11B1P4 | RAB11 family interacting protein 4 (class II)                                           |
| 1.22010051  | 0.01414 | 1.084477409 | 0.14577 | RAB15     | RAB15, member RAS oncogene family                                                       |
| 0.688247801 | 0.01121 | 0.886996305 | 0.08609 | RAB24     | RAB24, member RAS oncogene family                                                       |
| 1.249196126 | 0.00655 | 1.138394029 | 0.12694 | RAB27A    | RAB27A, member RAS oncogene family                                                      |
| 1.225185332 | 0.04998 | 1.082424442 | 0.13275 | RAB38     | RAB38, member RAS oncogene family                                                       |
| 0.643046742 | 0.01725 | 0.804898991 | 0.07573 | RAB38GAP1 | RAB3 GTPase activating protein subunit 1 (catalytic)                                    |
| 1.204972315 | 0.01862 | 1.060887741 | 0.3918  | RAB43     | RAB43, member RAS oncogene family                                                       |
| 0.463615273 | 0.04697 | 0.672683604 | 0.08651 | RAB5A     | RAB5A, member RAS oncogene family                                                       |
| 0.511214265 | 0.00186 | 0.732550437 | 0.11369 | RAB6A     | RAB6A, member RAS oncogene family                                                       |
| 0.803293997 | 0.00924 | 1.011520    |         |           |                                                                                         |

|              |         |               |         |           |                                                                                                          |
|--------------|---------|---------------|---------|-----------|----------------------------------------------------------------------------------------------------------|
| 0.699792933  | 0.0035  | 0.753667455   | 0.09328 | RALGPS2   | Ral GEF with PH domain and SH3 binding motif 2                                                           |
| 0.741747467  | 0.02834 | 0.905006463   | 0.21706 | RANBP10   | RAN binding protein 10                                                                                   |
| 0.453130969  | 0.01495 | 0.815072332   | 0.09305 | RAPGEF1   | Rap guanine nucleotide exchange factor (GEF)-like 1                                                      |
| 1.269270886  | 0.04072 | 1.071773463   | 0.26403 | RARRES1   | retinoic acid receptor responder (tazarotene induced) 1                                                  |
| 1.349102534  | 0.03087 | 1.141554707   | 0.12824 | RARRES1   | retinoic acid receptor responder (tazarotene induced) 1                                                  |
| 0.764188265  | 0.01118 | 0.895025071   | 0.08554 | RASAL1    | RAS protein activator like 1 (GAP1 like)                                                                 |
| 0.843815796  | 0.04126 | 1.014662547   | 0.78931 | RBL1      | retinoblastoma-like 1 (p107)                                                                             |
| 1.381274448  | 0.04407 | 1.108800644   | 0.09757 | RBM33     | RNA binding motif protein 33                                                                             |
| 0.839149637  | 0.03009 | 0.931094827   | 0.09004 | RBMX      | RNA binding motif protein, X-linked                                                                      |
| 0.765778999  | 0.03763 | 0.930449658   | 0.22937 | RBMX2     | RNA binding motif protein, X-linked 2                                                                    |
| 1.450020344  | 0.01457 | 1.035038174   | 0.55159 | RBMV5     | RNA binding protein with multiple splicing                                                               |
| 1.229438867  | 0.03565 | 1.102669163   | 0.09475 | RBPM52    | RNA binding protein with multiple splicing 2                                                             |
| 0.714001199  | 0.00203 | 0.843231111   | 0.05966 | RBX1      | ring-box 1, E3 ubiquitin protein ligase                                                                  |
| 1.679462986  | 0.00521 | 1.267512522   | 0.12607 | RHD10     | retinol dehydrogenase 10 (all-trans)                                                                     |
| 0.703684188  | 0.04663 | 1.050444544   | 0.50064 | RHD11     | retinol dehydrogenase 11 (all-trans/9-cis/11-cis)                                                        |
| 0.777546036  | 0.00884 | 0.845572287   | 0.05105 | RHD13     | retinol dehydrogenase 13 (all-trans/9-cis)                                                               |
| 0.764718139  | 0.04331 | 1.020304659   | 0.07659 | REEP1     | retceptor accessory protein 1                                                                            |
| 0.668500248  | 0.02795 | 0.822450069   | 0.05295 | REPS1     | RALBP1 associated Eps domain containing 1                                                                |
| 1.325007017  | 0.03031 | 1.127400412   | 0.11888 | RERG      | RAS-like, estrogen-regulated, growth inhibitor                                                           |
| 0.792234811  | 0.02499 | 0.922103118   | 0.29972 | RFC1      | replication factor C (activator 1) 1, 145kDa                                                             |
| 1.22010051   | 0.03566 | 0.984184022   | 0.78571 | RFFL      | ring finger and FYVE-like domain containing 1                                                            |
| 1.310391964  | 0.01119 | 1.125503826   | 0.07276 | RGL3      | rat guanine nucleotide dissociation stimulator-like 3                                                    |
| 1.163026534  | 0.03885 | 0.941478465   | 0.27419 | RG513     | regulator of G-protein signaling 13                                                                      |
| 0.679243142  | 0.03074 | 0.963261894   | 0.65822 | RG514     | regulator of G-protein signaling 14                                                                      |
| 1.397646972  | 0.00291 | 1.110338834   | 0.20036 | RG519     | regulator of G-protein signaling 19                                                                      |
| 1.268391399  | 0.01904 | 1.059218335   | 0.22747 | RG56      | regulator of G-protein signaling 6                                                                       |
| 0.707186781  | 0.01112 | 0.975503046   | 0.51242 | RHBDL2    | rhomboid, weinreb-like 2 (Drosophila)                                                                    |
| 0.613867842  | 0.02138 | 0.772710255   | 0.10033 | RHBDL2    | rhomboid, weinreb-like 2 (Drosophila)                                                                    |
| 1.4054187    | 0.01462 | 1.072516617   | 0.4833  | RHOB      | ras homolog gene family, member B                                                                        |
| 1.391846392  | 0.01514 | 1.104964485   | 0.12745 | RHOF      | ras homolog gene family, member F (in filopodia)                                                         |
| 1.448942155  | 0.02455 | 1.135242102   | 0.05703 | RHPN2     | rhoplin, Rho GTPase binding protein                                                                      |
| 0.827596816  | 0.03001 | 0.930449658   | 0.25181 | RIM53     | regulating synaptic membrane exocytosis 3                                                                |
| 0.668037039  | 0.03513 | 0.951453108   | 0.12358 | RT1       | Ras-like without CAA1                                                                                    |
| 1.17772279   | 0.04008 | 1.009051634   | 0.91081 | RMST      | rhabdomyosarcoma 2 associated transcript (non-protein coding)                                            |
| 0.685391402  | 0.01323 | 0.69640574    | 0.11893 | RNA5E7    | ribonuclease, RNase A family, 7                                                                          |
| 0.544498508  | 0.00226 | 0.744322628   | 0.23568 | RNA5E7    | ribonuclease, RNase A family, 7                                                                          |
| 0.521594297  | 0.02015 | 0.727490242   | 0.35817 | RNA5E7    | ribonuclease, RNase A family, 7                                                                          |
| 1.28866251   | 0.02382 | 1.125313481   | 0.10757 | RNF130    | ring finger protein 130                                                                                  |
| 1.138394029  | 0.04794 | 0.939522749   | 0.24993 | RNF17     | ring finger protein 17                                                                                   |
| 1.392811481  | 0.02805 | 1.235418637   | 0.09238 | RNF198    | ring finger protein 198                                                                                  |
| 1.261377409  | 0.03808 | 1.057750964   | 0.44184 | RNF207    | ring finger protein 207                                                                                  |
| 1.38991822   | 0.02158 | 1.215036792   | 0.09881 | RNF208    | ring finger protein 208                                                                                  |
| 1.376495602  | 0.00686 | 1.108800644   | 0.09957 | RNF213    | ring finger protein 213                                                                                  |
| 0.865865544  | 0.00844 | 0.832614654   | 0.07099 | RNF39     | ring finger protein 39                                                                                   |
| 1.476314406  | 0.00315 | 1.121166078   | 0.077   | RNF5      | ring finger protein 5                                                                                    |
| 0.621574834  | 0.00782 | 0.825877665   | 0.29744 | RNF6      | ring finger protein (C3H2C3 type) 6                                                                      |
| 0.643494624  | 0.03573 | 0.893785162   | 0.16011 | RNF7      | ring finger protein 7                                                                                    |
| 0.665725807  | 0.02164 | 0.925304428   | 0.19186 | RNF7      | ring finger protein 7                                                                                    |
| 0.623005997  | 0.02045 | 0.891318496   | 0.0715  | RNOM1     | reactive oxygen species modulator 1                                                                      |
| 0.6944775618 | 0.00275 | 0.987781316   | 0.35244 | ROR1      | receptor tyrosine kinase-like orphan receptor 1                                                          |
| 0.790589117  | 0.01654 | 0.936272247   | 0.36314 | ROR1      | receptor tyrosine kinase-like orphan receptor 1                                                          |
| 0.679714121  | 0.01254 | 0.849684999   | 0.14508 | RPAP3     | RNA polymerase II associated protein 3                                                                   |
| 1.32317144   | 0.02138 | 1.005560508   | 0.95861 | RPH3AL    | rabphilin 3A-like (without C2 domains)                                                                   |
| 0.832775771  | 0.02372 | 0.936799945   | 0.05298 | RPL12     | ribosomal protein L12                                                                                    |
| 0.805524291  | 0.00593 | 0.82737476    | 0.09523 | RPL15     | ribosomal protein L15                                                                                    |
| 0.61301743   | 0.02294 | 0.976031761   | 0.77991 | RPL23     | ribosomal protein L23                                                                                    |
| 0.852634892  | 0.04526 | 0.998614666   | 0.96508 | RPL23A    | ribosomal protein L23a                                                                                   |
| 0.4727646    | 0.03853 | 0.967947027   | 0.54106 | RPL26     | ribosomal protein L26                                                                                    |
| 0.737645729  | 0.02001 | 0.939522749   | 0.0564  | RPL31     | ribosomal protein L31                                                                                    |
| 0.87417962   | 0.0147  | 0.951338276   | 0.15472 | RPL32     | ribosomal protein L32                                                                                    |
| 0.679243142  | 0.03217 | 0.878539133   | 0.17055 | RPL32P3   | ribosomal protein L32 pseudogene 3                                                                       |
| 0.704172113  | 0.02766 | 0.923382311   | 0.14515 | RPL35A    | ribosomal protein L35a                                                                                   |
| 0.687770909  | 0.03835 | 0.949342121   | 0.24951 | RPL36A    | ribosomal protein L36a                                                                                   |
| 0.628506687  | 0.04715 | 0.964598185   | 0.50524 | RPLP2     | ribosomal protein, large, P2                                                                             |
| 0.716480825  | 0.01097 | 0.86534456    | 0.05483 | RPP14     | ribonuclease P/MRP14Da subunit                                                                           |
| 0.659296807  | 0.03579 | 0.840313752   | 0.0571  | RPS13     | ribosomal protein 39                                                                                     |
| 0.595015848  | 0.04789 | 0.955282936   | 0.27129 | RPS24     | ribosomal protein S24                                                                                    |
| 0.653835674  | 0.02142 | 0.950003383   | 0.1832  | RPS25     | ribosomal protein S25                                                                                    |
| 1.373636233  | 0.0483  | 0.981459064   | 0.73975 | RPS27L    | ribosomal protein S27-like                                                                               |
| 0.728499557  | 0.03746 | 0.929804943   | 0.05177 | RPS4X     | ribosomal protein S4, X-linked                                                                           |
| 1.31494276   | 0.02454 | 0.908756564   | 0.0715  | RPS6A1    | ribosomal protein S6 kinase, 90kDa, polypeptide 1                                                        |
| 0.622005827  | 0.04419 | 0.898688616   | 0.11728 | RPS7      | ribosomal protein S7                                                                                     |
| 0.842062954  | 0.04156 | 0.923382311   | 0.05021 | RPS7      | ribosomal protein S7                                                                                     |
| 0.670356296  | 0.04761 | 0.961260928   | 0.40407 | RPS8      | ribosomal protein S8                                                                                     |
| 0.856188285  | 0.04421 | 0.936799945   | 0.13931 | RPSA      | ribosomal protein S4                                                                                     |
| 0.74949801   | 0.02382 | 0.894404002   | 0.12012 | RRA6A     | RAS-related GTP binding A                                                                                |
| 0.779704843  | 0.04678 | 0.974172911   | 0.0394  | RSP10B2   | ribital spoke head 10 homolog B2 (Chlamydomonas)                                                         |
| 0.779704843  | 0.0098  | 0.864537231   | 0.11155 | RUFY2     | RUN and FYVE domain containing 2                                                                         |
| 1.282536603  | 0.03226 | 1.110338834   | 0.13907 | RUNX1     | runt-related transcription factor 1                                                                      |
| 0.68777249   | 0.04106 | 0.921464186   | 0.39974 | RYK       | RYK receptor-like tyrosine kinase                                                                        |
| 0.72064874   | 0.02979 | 1.006257823   | 0.95417 | S100A12   | S100 calcium binding protein A12                                                                         |
| 0.763557459  | 0.03374 | 0.983093997   | 0.1305  | SACD1     | SAC1 domain containing 1                                                                                 |
| 1.23533302   | 0.0347  | 1.105700653   | 0.09861 | SALL2     | sal-like 2 (Drosophila)                                                                                  |
| 1.216722359  | 0.0203  | 1.066585781   | 0.3743  | SAMD4A    | sterile alpha motif domain containing 4A                                                                 |
| 1.474269217  | 0.04509 | 1.17772279    | 0.1935  | SAMHD1    | SAM domain and HD domain 1                                                                               |
| 1.35754498   | 0.02086 | 1.095811766   | 0.08642 | SAMSN1    | SAM domain, SH3 domain and nuclear localization signals 1                                                |
| 0.55826481   | 0.02226 | 0.679734121   | 0.09318 | SCAMP1    | secretory carrier membrane protein 1                                                                     |
| 1.295940955  | 0.04666 | 1.071773463   | 0.26014 | SCG2      | scrotoxin II                                                                                             |
| 0.828170661  | 0.02896 | 1.002081605   | 0.95853 | SCN       | scinderin                                                                                                |
| 1.431968741  | 0.0139  | 1.207480591   | 0.13959 | SCML4     | sex comb on midleg-like 4 (Drosophila)                                                                   |
| 0.802181166  | 0.02364 | 0.943438251   | 0.23828 | SCRN3     | secernin 3                                                                                               |
| 1.570256237  | 0.01997 | 1.229438867   | 0.12088 | SDC2      | syndecan 2                                                                                               |
| 1.240196126  | 0.01516 | 1.048063408   | 0.2505  | SDHD      | succinate dehydrogenase complex, subunit D, integral membrane protein                                    |
| 1.229438867  | 0.02147 | 1.053361036   | 0.4065  | SDK2      | sidekick homolog 2 (chicken)                                                                             |
| 1.723092319  | 0.01863 | 1.143138335   | 0.13519 | SDRP      | serum deprivation response                                                                               |
| 1.25271991   | 0.0373  | 1.074749173   | 0.2623  | SECI4L3   | SECI4-like 3 (S. cerevisiae)                                                                             |
| 1.782620992  | 0.02078 | 1.143138335   | 0.15096 | SEC24A    | SEC24 family, member A (S. cerevisiae)                                                                   |
| 1.812523877  | 0.00618 | 1.188383105   | 0.06823 | SEC24B    | SEC24 family, member B (S. cerevisiae)                                                                   |
| 0.737990291  | 0.04019 | 1.074749173   | 0.156   | SELL3     | sell-1 suppressor of lin-12-like 3 (C. elegans)                                                          |
| 1.246601194  | 0.01365 | 1.099616149   | 0.13859 | SELK      | selenoprotein K                                                                                          |
| 0.683493726  | 0.03242 | 0.943438251   | 0.5827  | SEMA3F    | sema domain, immunoglobulin domain (Igf), short basic domain, secreted, (semaphorin) 3F                  |
| 0.474321518  | 0.03026 | 0.604997045   | 0.0843  | SERPINB13 | serpin peptidase inhibitor, clade B (ovalbumin), member 13                                               |
| 0.778085177  | 0.03804 | 0.898688616   | 0.14928 | SETD8     | SET domain containing (lysine methyltransferase) 8                                                       |
| 0.840896415  | 0.04538 | 1.06733721    | 0.257   | SETD8B    | SET domain, bifurcated                                                                                   |
| 1.22436392   | 0.02269 | 1.107264584   | 0.0769  | SEZ6      | seizure related 6 homolog (mouse)                                                                        |
| 1.286097483  | 0.0274  | 1.118061851   | 0.37158 | SEZ6L2    | seizure related 6 homolog (mouse)-like 2                                                                 |
| 1.356604327  | 0.02141 | 1.057750964   | 0.28022 | SFT2D1    | SFT2 domain containing 1                                                                                 |
| 1.155886707  | 0.04657 | 1.065108203   | 0.18663 | SFTPB     | surfactant protein B                                                                                     |
| 0.677832163  | 0.00843 | 0.808778116   | 0.12596 | SFTPD     | surfactant protein D                                                                                     |
| 0.745389192  | 0.04809 | 0.85559026    | 0.11642 | SGMS2     | sphingomyelin synthase 2                                                                                 |
| 1.29056249   | 0.02268 | 1.099616149   | 0.07687 | SGSM1     | small G protein signaling modulator 1                                                                    |
| 0.791685866  | 0.04143 | 1.011152081   | 0.80232 | SGSM2     | small G protein signaling modulator 2                                                                    |
| 1.373636233  | 0.0138  | 1.117287138   | 0.27763 | SH2D1A    | SH2 domain containing 1A                                                                                 |
| 1.761738748  | 0.02159 | 1.134455485   | 0.16859 | SH2D1B    | SH2 domain containing 1B                                                                                 |
| 0.593779833  | 0.02378 | 0.863339559   | 0.11081 | SH3BGR1   | SH3 domain binding glutamic acid-rich protein like                                                       |
| 1.264879542  | 0.04233 | 1.068805091   | 0.22077 | SH3TC2    | SH3 domain and tetratricopeptide repeats 2                                                               |
| 1.204137381  | 0.01464 | 1.067325338   | 0.11281 | SHISA8    | shisa homolog 8 (Xenopus laevis)                                                                         |
| 1.298638603  | 0.0129  | 1.195819797   | 0.06243 | SHROOM1   | shroom family member 1                                                                                   |
| 1.209994089  | 0.02632 | 1.049716684   | 0.17481 | SHGLEC8   | sialic acid binding Ig-like lectin 8                                                                     |
| 1.314031627  | 0.00774 | 1.080800644   | 0.0853  | SIRP      | signal-regulatory protein domain 4                                                                       |
| 1.368883813  | 0.01339 | 1.044635763   | 0.368   | SIRT4     | sirtuin 4                                                                                                |
| 1.312211255  | 0.01004 | 1.096571589   | 0.26621 | SIX1      | SIX homeobox 1                                                                                           |
| 1.411275843  | 0.00055 | 1.077733145   | 0.1625  | SKAP2     | src kinase associated phosphoprotein 2                                                                   |
| 0.537747195  | 0.02598 | 0.788946841   | 0.09156 | SLAIN2    | SLAIN motif family, member 2                                                                             |
| 0.511214265  | 0.01015 | 0.75733158    | 0.13701 | SLAIN2    | SLAIN motif family, member 2                                                                             |
| 1.258757174  | 0.04132 | 1.108800644   | 0.06598 | SLC17A3   | solute carrier family 17 (sodium phosphate), member 3                                                    |
| 1.38895136   | 0.04118 | 1.194163187   | 0.05693 | SLC17A5   | solute carrier family 17 (anion/sugar transporter), member 5                                             |
| 1.268391399  | 0.02757 | 1.036701101   | 0.47431 | SLC19A1   | solute carrier family 19 (folate transporter), member 1                                                  |
| 1.442928687  | 0.04675 | 1.21335356    | 0.15823 | SLC11A1   | solute carrier family 11 (neuronal/epithelial high affinity glutamate transporter, system Xag), member 1 |
| 1.566994374  | 0.02075 | 1.057158102   | 0.25633 | SLC11A4   | solute carrier family 11 (glutamate/neutral amino acid transporter), member 4                            |
| 1.17772279   | 0.02696 | 1.062159186   | 0.23132 | SLC11A7   | solute carrier family 11 (glutamate transporter), member 7                                               |
| 2.05627653   | 0.03114 | 1.132883885   | 0.40587 | SLC20A1   | solute carrier family 20 (phosphate transporter), member 1                                               |
| 1.220946513  | 0.04437 | 1.066585781   | 0.2176  | SLC24A2   | solute carrier family 24 (sodium/potassium/calcium exchanger), member 2                                  |
| 1.342572503  | 0.0208  | 1.108032348   | 0.08195 | SLC24A4   | solute carrier family 24 (sodium/potassium/calcium exchanger), member 4                                  |
| 1.296899555  | 0.02713 | 1.092777739   | 0.26119 | SLC25A23  | solute carrier family 25 (mitochondrial carrier, phosphate carrier), member 23                           |
| 0.793784137  | 0.01538 | 0.84616547    | 0.13701 | SLC25A27  | solute carrier family 25, member 27                                                                      |
| 0.741233505  | 0.04137 | 0.987600861   | 0.8631  | SLC28A3   | solute carrier family 28 (sucrose-coupled nucleoside transporter), member 3                              |
| 1.320422841  | 0.03072 | 1.118061851   | 0.11913 | SLC29A5   | solute carrier family 29 (facilitated glucose/fructose transporter), member 5                            |
| 1.417157397  | 0.00682 | 1.200803427   | 0.06675 | SLC29A6   | solute carrier family 29 (glucose transporter), member 6                                                 |
| 0.759962428  | 0.04413 | 0.918276162   | 0.25234 | SLC31A1   | solute carrier family 31 (copper transporter), member 1                                                  |
| 1.445931295  | 0.03    | 1.02532332311 | 0.46238 | SLC32A1   | solute carrier family 32 (cetyl-CoA transporter), member 1                                               |
| 1.275444392  | 0.00807 | 1.112650121   | 0.12963 | SLC35D1   | solute carrier family 35 (UDP-glucuronic acid/UDP-N-acetylgalactosamine dual transporter), member D1     |
| 1.212512819  | 0.04726 | 1.114193651   | 0.06124 | SLC39A3   | solute carrier family 39 (zinc transporter), member 3                                                    |
| 1.199139914  | 0.02957 | 1.117287138   | 0.12421 | SLC39A3   | solute carrier family 39 (zinc transporter), member 3                                                    |
| 0.390934822  | 0.0159  | 0.76630998    | 0.1238  | SLC39A6   | solute carrier family 39 (zinc transporter), member 6                                                    |
| 0.45565064   | 0.04372 | 0.822450069   | 0.27533 | SLC39A6   | solute carrier family 39 (zinc transporter), member 6                                                    |
| 1.374588696  | 0.03467 | 1.073260286   | 0.3006  | SLC39A8   | solute carrier family 39 (zinc transporter), member 8                                                    |

|             |          |             |         |           |                                                                                                               |
|-------------|----------|-------------|---------|-----------|---------------------------------------------------------------------------------------------------------------|
| 1.504203751 | 0.01286  | 1.062895674 | 0.3285  | SLC41A2   | solute carrier family 41, member 2                                                                            |
| 1.207480591 | 0.03818  | 1.017173463 | 0.23407 | SLC43A2   | solute carrier family 43, member 2                                                                            |
| 0.431969094 | 0.00027  | 0.843231111 | 0.11015 | SLC44A1   | solute carrier family 44, member 1                                                                            |
| 1.45195828  | 0.01528  | 1.126619228 | 0.26152 | SLC44A1   | solute carrier family 44, member 1                                                                            |
| 0.689202576 | 0.01013  | 0.869969005 | 0.15072 | SLC44A5   | solute carrier family 44, member 5                                                                            |
| 0.643048742 | 0.01326  | 0.76530998  | 0.05007 | SLC44A5   | solute carrier family 44, member 5                                                                            |
| 1.300440147 | 0.04284  | 1.224336392 | 0.06602 | SLC45A4   | solute carrier family 45, member 4                                                                            |
| 1.396678532 | 0.01344  | 1.066585781 | 0.38729 | SLC47A1   | solute carrier family 47, member 1                                                                            |
| 0.494142826 | 0.00226  | 0.85086373  | 0.13687 | SLC47A2   | solute carrier family 47, member 1                                                                            |
| 1.366987452 | 0.01945  | 1.082975046 | 0.13896 | SLC4A8    | solute carrier family 4, sodium bicarbonate cotransporter, member 8                                           |
| 1.122585898 | 0.00557  | 0.814741763 | 0.09689 | SLC4A1    | solute carrier family 6 (neurotransmitter transporter, GABA), member 1                                        |
| 1.17772729  | 0.04094  | 0.018891197 | 0.77188 | SLC6A2    | solute carrier family 6 (neurotransmitter transporter, noradrenalin), member 2                                |
| 1.492778383 | 0.00619  | 1.163926534 | 0.1767  | SLC7A11   | solute carrier family 7 (anionic amino acid transporter light chain, xc- system), member 11                   |
| 0.643048742 | 0.01142  | 0.903752727 | 0.2634  | SLC7A8    | solute carrier family 7 (amino acid transporter light chain, L system), member 8                              |
| 1.181811547 | 0.03827  | 0.977385766 | 0.61468 | SLC8A1    | solute carrier family 8 (sodium/calcium exchanger), member 1                                                  |
| 1.31494276  | 0.03487  | 1.108832448 | 0.07972 | SLC8A1    | solute carrier family 8 (sodium/calcium exchanger), member 1                                                  |
| 1.25929208  | 0.00482  | 1.009055534 | 0.88108 | SLC9A2    | solute carrier family 9 (sodium/calcium exchanger), member 2                                                  |
| 0.773782497 | 0.04862  | 1.021012126 | 0.86249 | SLC9A9    | solute carrier family 9 (sodium/hydrogen exchanger), member 9                                                 |
| 0.7031966   | 0.01146  | 0.938221197 | 0.4394  | SLP1      | secretory leukocyte peptidase inhibitor                                                                       |
| 0.720464874 | 0.03613  | 0.842062954 | 0.08342 | SMAD4     | SMAD family member 4                                                                                          |
| 0.5885758   | 0.00927  | 1.151867542 | 0.08569 | SMAD6     | SMAD family member 6                                                                                          |
| 1.304050735 | 0.019    | 0.997231251 | 0.95594 | SMAD7     | SMAD family member 7                                                                                          |
| 1.754712984 | 0.03125  | 0.903126511 | 0.40239 | SMEK1     | SMEK homolog 1, suppressor of mek1 (Dictyostellum)                                                            |
| 0.704660378 | 0.02519  | 0.84400887  | 0.14949 | SMEK1     | SMEK homolog 1, suppressor of mek1 (Dictyostellum)                                                            |
| 0.743806881 | 0.00685  | 0.885153765 | 0.26356 | SMEK2     | SMEK homolog 2, suppressor of mek1 (Dictyostellum)                                                            |
| 1.216272359 | 0.04774  | 1.065108203 | 0.23627 | SNAI1     | snail homolog 1 (Drosophila)                                                                                  |
| 1.592176198 | 0.04631  | 0.874194765 | 0.10482 | SNCA      | synuclein, alpha (non A4 component of amyloid precursor)                                                      |
| 1.21676922  | 0.02951  | 1.075282827 | 0.18466 | SNAIP1    | synuclein, alpha interacting protein                                                                          |
| 0.672683604 | 0.03844  | 0.867538687 | 0.05071 | SNHG1     | small nucleolar RNA host gene 1 (non-protein coding)                                                          |
| 1.182631    | 0.04614  | 0.996540263 | 0.92197 | SNHG4     | small nucleolar RNA host gene 4 (non-protein coding)                                                          |
| 0.774310028 | 0.03488  | 0.889458994 | 0.08101 | SNHG7     | small nucleolar RNA host gene 7 (non-protein coding)                                                          |
| 0.604997045 | 0.01157  | 0.988262796 | 0.11087 | SNHG8     | small nucleolar RNA host gene 8 (non-protein coding)                                                          |
| 1.350974085 | 0.00928  | 1.005532535 | 0.50656 | SNORA17B  | small nucleolar RNA, H/ACA box 71B                                                                            |
| 0.718968266 | 0.01604  | 0.971880988 | 0.72927 | SNORD104  | small nucleolar RNA, C/D box 104                                                                              |
| 0.489710149 | 0.02592  | 0.853817714 | 0.08793 | SNW1      | SNW domain containing 1                                                                                       |
| 1.914542916 | 0.00413  | 1.22603486  | 0.11102 | SNX10     | sorting nexin 10                                                                                              |
| 1.203303026 | 0.01109  | 1.064701842 | 0.2231  | SNX13     | sorting nexin 13                                                                                              |
| 1.231144413 | 0.02478  | 1.024565823 | 0.68364 | SNX18     | sorting nexin 18                                                                                              |
| 1.644900137 | 0.01383  | 1.167967395 | 0.09452 | SNX31     | sorting nexin 31                                                                                              |
| 1.311302014 | 0.02998  | 1.054091423 | 0.45551 | SNXS      | sorting nexin 5                                                                                               |
| 0.858565436 | 0.04874  | 0.925946023 | 0.35548 | SNXS      | sorting nexin 5                                                                                               |
| 1.525201653 | 0.03536  | 1.120389214 | 0.21022 | SOD2      | superoxide dismutase 2, mitochondrial                                                                         |
| 1.456999114 | 0.03114  | 1.268391399 | 0.0589  | SOD3      | superoxide dismutase 3, extracellular                                                                         |
| 1.589970502 | 0.036    | 1.01395948  | 0.86491 | SOST      | sclerostin                                                                                                    |
| 1.21333556  | 0.03469  | 1.060687741 | 0.10997 | SOX11     | SRX (sex determining region Y)-box 11                                                                         |
| 1.51887169  | 0.01529  | 1.179356592 | 0.08838 | SOX17     | SRX (sex determining region Y)-box 17                                                                         |
| 0.549880875 | 0.00092  | 0.856188285 | 0.21063 | SOX2      | SRX (sex determining region Y)-box 2                                                                          |
| 1.273677475 | 0.00764  | 1.074004472 | 0.15169 | SP110     | SP110 nuclear body protein                                                                                    |
| 1.388955186 | 0.00273  | 1.07108823  | 0.23142 | SP110     | SP110 nuclear body protein                                                                                    |
| 1.338855237 | 0.01974  | 1.080723402 | 0.19456 | SP110     | SP110 nuclear body protein                                                                                    |
| 1.257013375 | 0.02996  | 1.108800644 | 0.1398  | SP3       | Sp3 transcription factor                                                                                      |
| 1.249196126 | 0.01966  | 1.059218335 | 0.17449 | SPAG5-AS1 | SPAG5 antisense RNA 1 (non-protein coding)                                                                    |
| 1.572434584 | 0.03203  | 0.917639882 | 0.55107 | SPC2      | signal peptidase complex subunit 2 homolog (S. cerevisiae)                                                    |
| 1.265765594 | 0.01998  | 0.998614666 | 0.99004 | SPNK3     | spindlin family, member 3                                                                                     |
| 0.652962388 | 0.00323  | 0.871786993 | 0.06989 | SPNK7     | serine peptidase inhibitor, subtilisin type 7 (putative)                                                      |
| 0.706616822 | 0.01343  | 0.933679945 | 0.57958 | SPIRE1    | spire homolog 1 (Drosophila)                                                                                  |
| 0.78132788  | 0.03675  | 0.947370071 | 0.64621 | SPIRE1    | spire homolog 1 (Drosophila)                                                                                  |
| 0.762600827 | 0.00581  | 0.90000193  | 0.06745 | SPIRE2    | spire homolog 2 (Drosophila)                                                                                  |
| 0.401090583 | 0.01023  | 0.848507902 | 0.53035 | SPRR2G    | small proline-rich protein 2G                                                                                 |
| 0.84518597  | 0.0328   | 0.991761731 | 0.90049 | SRD5A3    | steroid 5 alpha-reductase 3                                                                                   |
| 0.562529242 | 0.03854  | 0.886381699 | 0.2857  | SREK1     | splicing regulatory glutamine/lysine-rich protein 1                                                           |
| 0.775393206 | 0.01964  | 0.971307496 | 0.60956 | SRGAP2    | SUT-ROBO Rho GTPase activating protein 2                                                                      |
| 1.167158102 | 0.03478  | 1.111108729 | 0.07237 | SRL       | sarcalumenin                                                                                                  |
| 0.763129604 | 0.04291  | 0.905006463 | 0.07857 | SRP14     | signal recognition particle 14kDa (homologous Alu RNA binding protein)                                        |
| 0.616426163 | 0.01913  | 0.952637998 | 0.46205 | SRP2      | signal recognition particle 22kDa                                                                             |
| 0.682073917 | 0.04135  | 0.917333450 | 0.25629 | SRP2      | SRSF protein kinase 2                                                                                         |
| 0.720464874 | 0.00868  | 0.969289817 | 0.66196 | SRPK2     | SRSF protein kinase 2                                                                                         |
| 1.205807828 | 0.00997  | 1.076240125 | 0.26623 | SRPRB     | signal recognition particle receptor, B subunit                                                               |
| 0.635515845 | 0.00798  | 0.8362464   | 0.05217 | SRSF10    | serine/arginine-rich splicing factor 10                                                                       |
| 0.682073917 | 0.04332  | 0.922103118 | 0.56084 | SFA2      | sperm specific antigen 2                                                                                      |
| 1.305559787 | 0.00474  | 0.868980911 | 0.15853 | SSX1      | synovial sarcoma, X breakpoint 1                                                                              |
| 0.682073917 | 0.03592  | 0.915736886 | 0.07969 | ST13      | suppression of tumorigenicity 13 (colon carcinoma) (Hsp70 interacting protein)                                |
| 1.18759666  | 0.04778  | 1.029540083 | 0.53442 | STGALNAC5 | ST6 (alpha-N-acetyl-neuraminyl-2,3-beta-galactosyl-1,3)-N-acetylgalactosaminide alpha-2,6-sialyltransferase 5 |
| 1.214194884 | 0.004217 | 1.140763716 | 0.0565  | STGALNAC6 | ST6 (alpha-N-acetyl-neuraminyl-2,3-beta-galactosyl-1,3)-N-acetylgalactosaminide alpha-2,6-sialyltransferase 6 |
| 1.35846285  | 0.03092  | 1.055537178 | 0.4702  | STAC      | SH3 and cysteine rich domain                                                                                  |
| 1.471206746 | 0.03566  | 1.184270162 | 0.07343 | STAMBPL1  | STAM binding protein-like 1                                                                                   |
| 0.530243871 | 0.01214  | 0.787007977 | 0.0698  | STARD10   | sterol-related lipid transfer (START) domain containing 10                                                    |
| 1.788808084 | 0.01301  | 1.167158102 | 0.05372 | STARD3NL  | STARD3 N-terminal like                                                                                        |
| 1.266634254 | 0.02947  | 1.058484395 | 0.22824 | STAT5B    | signal transducer and activator of transcription 5B                                                           |
| 1.394743666 | 0.00613  | 1.104964485 | 0.17695 | STK17B    | serine/threonine kinase 17b                                                                                   |
| 1.237990291 | 0.00415  | 1.039579435 | 0.3264  | STK28     | serine/threonine kinase 28                                                                                    |
| 2.077718207 | 0.02378  | 0.934255808 | 0.05601 | STK4      | serine/threonine kinase 4                                                                                     |
| 0.663882579 | 0.00971  | 0.922103118 | 0.34764 | STOX2     | storkhead box 2                                                                                               |
| 1.350974085 | 0.01772  | 1.081474763 | 0.10231 | STRADB    | STE20-related kinase adaptor beta                                                                             |
| 0.723467443 | 0.00788  | 0.868742185 | 0.06081 | STX17     | syntaxin 17                                                                                                   |
| 0.709561678 | 0.01757  | 0.968618189 | 0.58829 | STX4      | syntaxin 4                                                                                                    |
| 0.717474767 | 0.00741  | 0.957271458 | 0.55787 | STX6      | syntaxin 6                                                                                                    |
| 0.812815602 | 0.01918  | 0.911303281 | 0.09573 | STX9      | syntaxin 9                                                                                                    |
| 1.18759666  | 0.03252  | 0.95554318  | 0.40135 | STXBP6    | syntaxin binding protein 6 (amlysin)                                                                          |
| 0.807201075 | 0.02055  | 0.94942121  | 0.33633 | SUGP2     | SURP and G patch domain containing 2                                                                          |
| 1.392811481 | 0.00984  | 1.132883885 | 0.08157 | SULT1E1   | sulfotransferase family 1E, estrogen-preferring, member 1                                                     |
| 0.708578698 | 0.01991  | 0.902500727 | 0.05247 | SUP16H    | suppressor of Ty 16 homolog (S. cerevisiae)                                                                   |
| 0.778085177 | 0.00961  | 0.930829845 | 0.45157 | SURP31    | suppressor of var1, 3-like 1 (S. cerevisiae)                                                                  |
| 1.379360922 | 0.00484  | 1.160703014 | 0.13979 | SUSD2     | sushi domain containing 2                                                                                     |
| 1.53581027  | 0.00331  | 1.099616149 | 0.12308 | SVIP      | small VCP/p97-interacting protein                                                                             |
| 1.306765254 | 0.03879  | 1.062895674 | 0.33145 | SYMPK     | sympleskin                                                                                                    |
| 1.24288282  | 0.01159  | 1.114193651 | 0.08908 | SYNP2     | synaptotagmin 2                                                                                               |
| 0.635515845 | 0.03603  | 0.816768991 | 0.20964 | SYP11     | synaptophysin-like 1                                                                                          |
| 0.783497187 | 0.01717  | 0.98828552  | 0.82826 | SYT8      | synaptotagmin VIII                                                                                            |
| 1.331451613 | 0.00236  | 1.133669413 | 0.0633  | TACC1     | transforming, acidic coiled-coil containing protein 1                                                         |
| 0.485653748 | 0.04429  | 0.828744904 | 0.4687  | TAF9B     | TAF9B RNA polymerase II, TATA box binding protein (TBP)-associated factor, 31kDa                              |
| 0.732042848 | 0.04066  | 0.918912883 | 0.14369 | TAOK3     | TAO kinase 3                                                                                                  |
| 0.772175133 | 0.03706  | 0.927873476 | 0.21581 | TBC1D14   | TBC1 domain family, member 14                                                                                 |
| 1.180174343 | 0.02813  | 1.019097083 | 0.70544 | TBC1D28   | TBC1 domain family, member 28                                                                                 |
| 1.25353302  | 0.0316   | 1.138394029 | 0.10263 | TBK1P1    | TBK1 binding protein 1                                                                                        |
| 1.217566019 | 0.04608  | 1.00486382  | 0.94379 | TBKX1     | T-box 21                                                                                                      |
| 1.252646439 | 0.03868  | 1.146312186 | 0.07803 | TBXA2R    | thromboxane A2 receptor                                                                                       |
| 0.822450069 | 0.03805  | 0.940174203 | 0.20875 | TCEB3     | transcription elongation factor B (SII), polypeptide 3 (110kDa, elongin A)                                    |
| 1.265053392 | 0.04791  | 1.012524807 | 0.84119 | TCF3      | transcription factor 3 (E2A immunoglobulin enhancer binding factors E12/E47)                                  |
| 1.620006947 | 0.02062  | 0.941941441 | 0.17272 | TCF7L2    | transcription factor 7-like 2 (T-cell specific, HMG-box)                                                      |
| 0.76260827  | 0.02036  | 0.918012883 | 0.28787 | TCHP      | trichoplein, keratin filament binding                                                                         |
| 1.199971382 | 0.04522  | 1.068065408 | 0.17567 | TDRKH     | tudor and KH domain containing                                                                                |
| 1.273677475 | 0.02147  | 1.035264924 | 0.51298 | TDRKH     | tudor and KH domain containing                                                                                |
| 0.817902059 | 0.02008  | 0.954621014 | 0.42867 | TECP2     | tectonin beta-propeller repeat containing 2                                                                   |
| 1.237990291 | 0.02947  | 1.034547582 | 0.61574 | TEX11     | testis expressed 11                                                                                           |
| 0.850232332 | 0.04062  | 0.898132373 | 0.11553 | TFDP2     | transcription factor Dp-2 (E2F dimerization partner 2)                                                        |
| 0.788946841 | 0.04852  | 0.98549337  | 0.85506 | TFDP2     | transcription factor Dp-2 (E2F dimerization partner 2)                                                        |
| 1.381274448 | 0.0279   | 1.115739322 | 0.41743 | TGFB11    | transforming growth factor beta 1 induced transcript 1                                                        |
| 0.76101669  | 0.02409  | 0.962594443 | 0.51041 | THADA     | thyroid adenoma associated                                                                                    |
| 0.734584317 | 0.00163  | 0.920825697 | 0.25706 | THG1L     | thRNA-histidine guanylyltransferase 1-like (S. cerevisiae)                                                    |
| 0.682546859 | 0.04699  | 1.020304659 | 0.71395 | THY11     | thymocyte nuclear protein 11                                                                                  |
| 0.794985251 | 0.00823  | 0.805524291 | 0.0599  | TIA1      | TIA1 cytotoxic granule-associated RNA binding protein                                                         |
| 0.52123288  | 0.0071   | 0.892546971 | 0.51978 | TIAM1     | T-cell lymphoma invasion and metastasis 1                                                                     |
| 1.441928871 | 0.00265  | 1.018891197 | 0.85032 | TIFA      | TRAF-interacting protein with forkhead-associated domain                                                      |
| 0.79224811  | 0.04355  | 0.94348251  | 0.28113 | TIMM23    | translocase of inner mitochondrial membrane 23 homolog (yeast)                                                |
| 0.520150133 | 0.00246  | 0.79654096  | 0.09833 | TIPI      | tight junction protein 1 (zona occludens 1)                                                                   |
| 0.690158677 | 0.00253  | 0.922742493 | 0.3361  | TLC01     | TLC domain containing 1                                                                                       |
| 1.59549048  | 0.00068  | 1.260503392 | 0.112   | TLR1      | toll-like receptor 1                                                                                          |
| 1.28788163  | 0.00507  | 1.140763716 | 0.10479 | TLR2      | toll-like receptor 2                                                                                          |
| 0.689202576 | 0.00082  | 0.885153765 | 0.0816  | TLR5      | toll-like receptor 5                                                                                          |
| 1.543280175 | 0.0216   | 1.076880376 | 0.15777 | TLR7      | toll-like receptor 7                                                                                          |
| 0.549880875 | 0.02615  | 0.813943185 | 0.06171 | TMSF2     | transmembrane 7 superfamily member 2                                                                          |
| 1.208317843 | 0.04923  | 1.041021598 | 0.46455 | TMCS      | transmembrane channel-like 6                                                                                  |
| 1.27279435  | 0.01653  | 1.083725967 | 0.2529  | TMED10    | transmembrane emp24-like trafficking protein 10 (yeast)                                                       |
| 1.168777249 | 0.0301   | 1.054091423 | 0.18789 | TMED5     | transmembrane emp24 protein transport domain containing 5                                                     |
| 1.379360922 | 0.02224  | 1.065108203 | 0.26918 | TMED5     | transmembrane emp24 protein transport domain containing 5                                                     |
| 1.27895581  | 0.0404   | 1.062955474 | 0.11059 | TMEM106A  | transmembrane protein 106A                                                                                    |
| 1.317679952 | 0.02989  | 1.079282827 | 0.26109 | TMEM108   | transmembrane protein 108                                                                                     |
| 0.742261785 | 0.01405  | 0.961260928 | 0.52413 | TMEM11    | transmembrane protein 11                                                                                      |
| 0.792234811 | 0.04379  | 0.847919965 | 0.0546  | TMEM125   | transmembrane protein 125                                                                                     |
| 0.668500248 | 0.00752  | 0.893785162 | 0.15015 | TMEM134   | transmembrane protein 134                                                                                     |
| 1.154285418 | 0.0347   | 1.048267908 | 0.1584  | TMEM150A  | transmembrane protein 150A                                                                                    |
| 0.645482145 | 0.00959  | 0.845572287 | 0.15701 | TMEM168   | transmembrane protein 168                                                                                     |
| 1.531557997 | 0.03366  | 1.010451446 | 0.85376 | TMEM170B  | transmembrane protein 170B                                                                                    |
| 1.28788163  | 0.0206   | 1.092777739 | 0.15858 | TMEM174   | transmembrane protein 174                                                                                     |
| 1.550786413 | 0.04039  | 0.94147846  |         |           |                                                                                                               |

|             |         |             |         |          |                                                                                          |
|-------------|---------|-------------|---------|----------|------------------------------------------------------------------------------------------|
| 1.194163187 | 0.04094 | 1.085229372 | 0.2507  | TMEM53   | transmembrane protein 53                                                                 |
| 1.267512522 | 0.04659 | 1.055553718 | 0.18528 | TMEM56   | transmembrane protein 56                                                                 |
| 0.792784137 | 0.0322  | 0.894404902 | 0.12457 | TMEM60   | transmembrane protein 60                                                                 |
| 0.720964436 | 0.00741 | 0.902500727 | 0.20999 | TMF1     | TATA element modulatory factor 1                                                         |
| 0.735603373 | 0.03126 | 0.866937564 | 0.05064 | TMLHE    | trimethyllysine hydroxylase, epsilon                                                     |
| 0.644834125 | 0.03091 | 0.724973216 | 0.16577 | TMOD3    | tropomodulin 3 (ubiquitous)                                                              |
| 0.566834706 | 0.00063 | 0.724973416 | 0.10658 | TMOD3    | tropomodulin 3 (ubiquitous)                                                              |
| 1.267512522 | 0.00395 | 0.97874165  | 0.70214 | TNF      | tumor necrosis factor                                                                    |
| 1.721898377 | 0.04566 | 1.248330549 | 0.11951 | TNFAIP6  | tumor necrosis factor, alpha-induced protein 6                                           |
| 1.280759861 | 0.02256 | 1.205807828 | 0.05038 | TNFRSF18 | tumor necrosis factor receptor superfamily, member 18                                    |
| 0.513069623 | 0.00123 | 0.86262545  | 0.19519 | TNFRSF19 | tumor necrosis factor receptor superfamily, member 19                                    |
| 0.552090424 | 0.03064 | 0.879039561 | 0.26623 | TNFRSF25 | tumor necrosis factor receptor superfamily, member 25                                    |
| 1.29145735  | 0.03129 | 1.128964405 | 0.06281 | TNFRSF9  | tumor necrosis factor receptor superfamily, member 9                                     |
| 1.196648963 | 0.04056 | 1.071030823 | 0.20874 | TNFSF11  | tumor necrosis factor (ligand) superfamily, member 11                                    |
| 1.310393404 | 0.02263 | 1.134455485 | 0.22311 | TNFSF12  | tumor necrosis factor (ligand) superfamily, member 12                                    |
| 1.271031689 | 0.03599 | 0.925946023 | 0.39082 | TNFSF9   | tumor necrosis factor (ligand) superfamily, member 9                                     |
| 1.270150983 | 0.01514 | 1.069547088 | 0.16577 | TNR      | TRAF2 and NCK interacting kinase                                                         |
| 0.71946679  | 0.01256 | 0.988285652 | 0.90129 | TNNT1    | troponin T type 1 (skeletal, slow)                                                       |
| 1.348167732 | 0.03708 | 1.098092814 | 0.43416 | TNS1     | tensin 1                                                                                 |
| 1.308578071 | 0.04805 | 0.992404375 | 0.90349 | TNS3     | tensin 3                                                                                 |
| 0.698823486 | 0.00438 | 0.920187651 | 0.20626 | TOP1MT   | topoisomerase (DNA) I, mitochondrial                                                     |
| 0.670355296 | 0.02805 | 0.775393206 | 0.08007 | TOR1AIP1 | torin A interacting protein 1                                                            |
| 0.746389192 | 0.02552 | 0.935623498 | 0.27717 | TOXA     | TOX high mobility group box family member 4                                              |
| 0.577943353 | 0.01001 | 0.792784137 | 0.05275 | TOXA     | TOX high mobility group box family member 4                                              |
| 0.504176227 | 0.00013 | 0.87539133  | 0.18498 | TP53AIP1 | tumor protein p53 regulated apoptosis inducing protein 1                                 |
| 0.580754366 | 0.00142 | 0.903257277 | 0.2515  | TP53AIP1 | tumor protein p53 regulated apoptosis inducing protein 1                                 |
| 1.257013375 | 0.0269  | 0.930259594 | 0.67351 | TP53B11  | tumor protein p53 inducible protein 11                                                   |
| 0.735093668 | 0.00555 | 0.911303281 | 0.05582 | TP53TG1  | TP53 target 1 (non-protein coding)                                                       |
| 0.758909626 | 0.01857 | 0.950659101 | 0.31058 | TP53TG1  | TP53 target 1 (non-protein coding)                                                       |
| 0.564873607 | 0.02758 | 0.81056512  | 0.23981 | TP63     | tumor protein p63                                                                        |
| 1.204972315 | 0.02057 | 1.175276328 | 0.07475 | TPK1     | thiamin pyrophosphokinase 1                                                              |
| 1.300440147 | 0.00956 | 1.111087229 | 0.27344 | TRABD    | TRAB domain containing                                                                   |
| 1.253533002 | 0.02947 | 0.965845736 | 0.19852 | TRABD    | TRAB domain containing                                                                   |
| 1.252664439 | 0.03949 | 1.043188594 | 0.44558 | TRAF3    | TNF receptor-associated factor 3                                                         |
| 1.270150983 | 0.019   | 1.070288698 | 0.13856 | TRAF4    | TNF receptor-associated factor 4                                                         |
| 0.655196702 | 0.00148 | 0.848507902 | 0.19571 | TREX2    | three prime repair exonuclease 2                                                         |
| 1.545421099 | 0.04952 | 1.12834949  | 0.05136 | TRHDE    | thyrotropin-releasing hormone degrading enzyme                                           |
| 1.180174343 | 0.01629 | 0.920187651 | 0.62427 | TRIM15   | tripartite motif containing 15                                                           |
| 0.456915725 | 0.00586 | 0.726986259 | 0.07629 | TRIM16   | tripartite motif containing 16                                                           |
| 1.304050735 | 0.01382 | 0.972654947 | 0.63876 | TRIM32   | tripartite motif containing 32                                                           |
| 1.250062303 | 0.02906 | 1.121943481 | 0.0558  | TRIM48   | tripartite motif containing 48                                                           |
| 1.256142381 | 0.00527 | 1.04608494  | 0.26002 | TRIM55   | tripartite motif containing 55                                                           |
| 0.671286251 | 0.0056  | 0.859756486 | 0.11309 | TRIM7    | tripartite motif containing 7                                                            |
| 1.464085696 | 0.0139  | 1.163026234 | 0.111   | TRP1     | transient receptor potential cation channel, subfamily A, member 1                       |
| 1.266634254 | 0.04252 | 0.998614666 | 0.97769 | TRPC6    | transient receptor potential cation channel, subfamily C, member 6                       |
| 0.819604608 | 0.01324 | 0.951977908 | 0.4036  | TRPM1    | transient receptor potential cation channel, subfamily M, member 1                       |
| 0.854409741 | 0.04121 | 1.001387256 | 0.97205 | TRPM1    | transient receptor potential cation channel, subfamily M, member 1                       |
| 1.296839555 | 0.03924 | 1.105730653 | 0.12722 | TRPM6    | transient receptor potential cation channel, subfamily M, member 6                       |
| 0.76154437  | 0.016   | 0.920187651 | 0.11523 | TRPM6    | transient receptor potential cation channel, subfamily M, member 6                       |
| 0.719546022 | 0.01123 | 0.88320331  | 0.06173 | TRPC2D2  | TRPC2 domain family, member 2                                                            |
| 0.681129017 | 0.02087 | 0.846745312 | 0.25968 | TSN      | translin                                                                                 |
| 1.216722359 | 0.02348 | 0.997231251 | 0.93834 | TSPAN3   | tetraspanin 3                                                                            |
| 0.818469182 | 0.0118  | 0.995849753 | 0.94894 | TSPAN9   | tetraspanin 9                                                                            |
| 0.847332435 | 0.04706 | 0.916368845 | 0.11523 | TSTO1    | thiosulfate sulfurtransferase (rhodanese)-like domain containing 1                       |
| 0.720464874 | 0.00576 | 0.978395886 | 0.24232 | TTC2     | tetratricopeptide repeat domain 22                                                       |
| 1.248330549 | 0.04015 | 1.041743429 | 0.57498 | TTC28    | tetratricopeptide repeat domain 28                                                       |
| 1.391846392 | 0.01323 | 1.043911927 | 0.54006 | TTC28    | tetratricopeptide repeat domain 28                                                       |
| 1.274560627 | 0.01023 | 1.085229372 | 0.13351 | TTC39C   | tetratricopeptide repeat domain 39C                                                      |
| 1.447938172 | 0.02028 | 1.094293701 | 0.17627 | TTC78    | tetratricopeptide repeat domain 78                                                       |
| 1.489677463 | 0.02848 | 1.04263247  | 0.17993 | TYRH2    | twenty homolog 2 (Drosophila)                                                            |
| 0.711531731 | 0.01121 | 0.921464186 | 0.22597 | TUBA3D   | tubulin, alpha 3d                                                                        |
| 0.599985691 | 0.03015 | 0.746906729 | 0.1363  | TXN      | thioredoxin                                                                              |
| 1.693490625 | 0.00008 | 1.163120042 | 0.11121 | TXNRD1   | thioredoxin reductase 1                                                                  |
| 0.570381858 | 0.00459 | 0.936921447 | 0.40027 | TYR      | tyrosinase (oculocutaneous albinism IA)                                                  |
| 0.655651007 | 0.02381 | 0.955282936 | 0.69701 | TYR      | tyrosinase (oculocutaneous albinism IA)                                                  |
| 0.235191344 | 0.01832 | 0.91531939  | 0.1057  | TYBP1    | tyrosinase-related protein 1                                                             |
| 0.595015848 | 0.03092 | 0.783497187 | 0.30529 | UBA6     | ubiquitin-like modifier activating enzyme 6                                              |
| 0.800514811 | 0.03737 | 0.887611337 | 0.10177 | UBAP2    | ubiquitin associated protein 2                                                           |
| 1.376495602 | 0.02192 | 1.057018041 | 0.31867 | UBASH3A  | ubiquitin associated and SH3 domain containing A                                         |
| 0.785128119 | 0.02792 | 0.997927219 | 0.97044 | UBE2DNL  | ubiquitin-conjugating enzyme E2D N-terminal like (pseudogene)                            |
| 1.543280175 | 0.016   | 1.152897905 | 0.0621  | UBE2N    | ubiquitin-conjugating enzyme E2, N, U                                                    |
| 1.644000137 | 0.01329 | 1.051901779 | 0.39019 | UBE2QL1  | ubiquitin-conjugating enzyme E2Q family-like 1                                           |
| 0.735093668 | 0.02539 | 0.942784536 | 0.31328 | UBE4B    | ubiquitination factor E4B                                                                |
| 0.746906729 | 0.02289 | 0.924663278 | 0.46557 | UBE4B    | ubiquitination factor E4B                                                                |
| 1.169587664 | 0.04328 | 1.058484395 | 0.27096 | UBOX5    | U-box domain containing 5                                                                |
| 0.61985385  | 0.00157 | 0.882702996 | 0.05344 | UBR4     | ubiquitin protein ligase E3 component n-recogin 4                                        |
| 0.65342257  | 0.01283 | 0.8826567   | 0.24232 | UBR5     | ubiquitin protein ligase E3 component n-recogin 5                                        |
| 1.200803427 | 0.01331 | 0.996540263 | 0.94435 | UBXN10   | UBX domain protein 10                                                                    |
| 0.713012859 | 0.0373  | 0.891310496 | 0.15647 | UCK2     | uridine-cytidine kinase 2                                                                |
| 1.207480591 | 0.045   | 1.112650121 | 0.10462 | UCKL1    | uridine-cytidine kinase 1-like 1                                                         |
| 1.220946513 | 0.03186 | 1.078480432 | 0.36176 | UNC13A   | unc-13 homolog A (C. elegans)                                                            |
| 1.255271991 | 0.03531 | 1.063139271 | 0.57811 | UNKL     | unlike1 homolog (Drosophila)-like                                                        |
| 1.222640278 | 0.03407 | 1.070288698 | 0.1455  | USP29    | ubiquitin specific peptidase 29                                                          |
| 0.730522189 | 0.00424 | 0.93109482  | 0.18074 | USP32    | ubiquitin specific peptidase 32                                                          |
| 0.800514811 | 0.04605 | 0.960594864 | 0.43695 | UXT      | ubiquitously-expressed transcript                                                        |
| 1.975201723 | 0.01    | 1.146312186 | 0.43599 | VIM      | vimentin                                                                                 |
| 1.691144576 | 0.01442 | 1.26252032  | 0.09612 | VNN1     | vanin 1                                                                                  |
| 2.080271526 | 0.01602 | 1.463071221 | 0.08412 | VNN1     | vanin 1                                                                                  |
| 1.190856849 | 0.02807 | 1.00765376  | 0.8482  | VPREB1   | pre-B lymphocyte 1                                                                       |
| 0.740719899 | 0.01145 | 0.875998315 | 0.14474 | VPS13D   | vacuolar protein sorting 13 homolog D (S. cerevisiae)                                    |
| 0.660211421 | 0.01116 | 0.852634892 | 0.06622 | VPS24    | vacuolar protein sorting 24 homolog (S. cerevisiae)                                      |
| 0.793889331 | 0.02719 | 0.893785162 | 0.09185 | VPS29    | vacuolar protein sorting 29 homolog (S. cerevisiae)                                      |
| 0.616853584 | 0.02854 | 0.927837476 | 0.09298 | VPS35    | vacuolar protein sorting 35 homolog (S. cerevisiae)                                      |
| 0.758909626 | 0.03606 | 0.917004043 | 0.22338 | VPS41    | vacuolar protein sorting 41 homolog (S. cerevisiae)                                      |
| 0.69477568  | 0.02745 | 0.930449568 | 0.16551 | VPS8     | vacuolar protein sorting 8 homolog (S. cerevisiae)                                       |
| 1.5888688   | 0.0016  | 1.082975046 | 0.19984 | WAS      | Wiskott-Aldrich syndrome (eczema-thrombocytopenia)                                       |
| 0.732550437 | 0.00352 | 0.90312651  | 0.26659 | WDFY3    | WD repeat and FYVE domain containing 3                                                   |
| 0.649765531 | 0.00483 | 0.862741345 | 0.0861  | WDFY3    | WD repeat and FYVE domain containing 3                                                   |
| 0.821245069 | 0.02496 | 0.86154546  | 0.06016 | WDR61    | WD repeat domain 61                                                                      |
| 1.338855257 | 0.01735 | 1.124278924 | 0.05862 | WDR91    | WD repeat domain 91                                                                      |
| 0.583579051 | 0.00745 | 0.982139595 | 0.90172 | WFDC12   | WAP four-disulfide core domain 12                                                        |
| 1.568080908 | 0.0005  | 1.183451022 | 0.22494 | WIPF1    | WAS/WASL interacting protein family, member 1                                            |
| 0.768970416 | 0.01512 | 0.880869374 | 0.06248 | WIP2     | WD repeat domain, phosphoinositide interacting 2                                         |
| 0.615999037 | 0.00497 | 0.805638571 | 0.10271 | WNT1     | X (inactive)-specific transcript (non-protein coding)                                    |
| 1.32317144  | 0.00196 | 1.080725402 | 0.38806 | XKR6     | XK, Kell blood group complex subunit-related family, member 6                            |
| 0.735093668 | 0.02646 | 0.920187651 | 0.19712 | XPO5     | exportin 5                                                                               |
| 0.825305409 | 0.00944 | 0.940826108 | 0.28375 | XPO6     | exportin 6                                                                               |
| 0.741747467 | 0.0448  | 0.941478465 | 0.38093 | XPO7     | exportin 7                                                                               |
| 0.78294296  | 0.03406 | 0.916368845 | 0.09709 | YBEY     | ybeY metalloprotease (putative)                                                          |
| 1.249516126 | 0.01874 | 0.8848891   | 0.24657 | YPEL2    | yppeY2 (Drosophila)                                                                      |
| 0.695440986 | 0.03416 | 0.76101669  | 0.06833 | YWHAZ    | tyrosine 3-monooxygenase/tryptophan 5-monooxygenase activation protein, zeta polypeptide |
| 0.66069203  | 0.04016 | 0.97063447  | 0.61286 | YY1      | YY1 transcription factor                                                                 |
| 1.326845141 | 0.0337  | 1.099616149 | 0.28969 | ZBTB38   | zinc finger and BTB domain containing 38                                                 |
| 1.231998073 | 0.01807 | 1.016774673 | 0.75643 | ZBTB44   | zinc finger and BTB domain containing 44                                                 |
| 1.185914499 | 0.01942 | 1.077733145 | 0.13065 | ZC4H2    | zinc finger, CCH2 domain containing                                                      |
| 1.297738767 | 0.00682 | 1.028826708 | 0.61784 | ZCCHC3   | zinc finger, CCHC domain containing 3                                                    |
| 0.636397468 | 0.03006 | 0.81056512  | 0.17627 | ZCCHC6   | zinc finger, CCHC domain containing 6                                                    |
| 1.208317843 | 0.02957 | 1.089752112 | 0.10195 | ZCWPW1   | zinc finger, CW type with PWWP domain 1                                                  |
| 0.775393206 | 0.03957 | 0.930449568 | 0.14487 | ZDHHC3   | zinc finger, DHHC-type containing 3                                                      |
| 1.386069886 | 0.01559 | 1.171210181 | 0.08658 | ZEB2     | zinc finger E-box binding homeobox 2                                                     |
| 1.179256592 | 0.02213 | 1.059692783 | 0.2021  | ZKSCAN3  | zinc finger with KRAB and SCAN domains 3                                                 |
| 1.70054832  | 0.01388 | 1.125058485 | 0.25599 | ZMAT1    | zinc finger, matrix-type 1                                                               |
| 0.731028724 | 0.00642 | 0.931740429 | 0.42026 | ZMYM4    | zinc finger, MYM-type 4                                                                  |
| 0.814507563 | 0.0472  | 0.948026965 | 0.27541 | ZNF133   | zinc finger protein 133                                                                  |
| 0.762072415 | 0.03932 | 0.894404902 | 0.23106 | ZNF140   | zinc finger protein 140                                                                  |
| 1.281547924 | 0.03947 | 1.066385781 | 0.50101 | ZNF148   | zinc finger protein 148                                                                  |
| 1.636938363 | 0.03404 | 1.109569472 | 0.23458 | ZNF167   | zinc finger protein 167                                                                  |
| 0.746906729 | 0.04037 | 0.910669834 | 0.15125 | ZNF248   | zinc finger protein 248                                                                  |
| 0.622005827 | 0.01347 | 0.865736566 | 0.1989  | ZNF323   | zinc finger protein 323                                                                  |
| 1.181811547 | 0.04596 | 1.074004472 | 0.13177 | ZNF341   | zinc finger protein 341                                                                  |
| 0.842062954 | 0.00232 | 0.820265697 | 0.23417 | ZNF350   | zinc finger protein 350                                                                  |
| 1.194991205 | 0.01222 | 1.030683919 | 0.39681 | ZNF382   | zinc finger protein 382                                                                  |
| 0.85027416  | 0.04594 | 0.971307496 | 0.48251 | ZNF396   | zinc finger protein 396                                                                  |
| 0.848507902 | 0.01744 | 0.911301281 | 0.26982 | ZNF41    | zinc finger protein 41                                                                   |
| 0.830470024 | 0.04153 | 0.874784765 | 0.11933 | ZNF45    | zinc finger protein 45                                                                   |
| 1.408344227 | 0.03434 | 1.25418637  | 0.0649  | ZNF580   | zinc finger protein 580                                                                  |
| 0.797192477 | 0.01543 | 1.001387256 | 0.97914 | ZNF607   | zinc finger protein 607                                                                  |
| 1.337927555 | 0.03614 | 1.172834949 | 0.15581 | ZNF618   | zinc finger protein 618                                                                  |
| 0.517991382 | 0.03564 | 0.675018993 | 0.06231 | ZNF655   | zinc finger protein 655                                                                  |
| 0.715984371 | 0.04612 | 1.021012126 | 0.788   | ZNF677   | zinc finger protein 677                                                                  |
| 1.28877463  | 0.00539 | 1.077733145 | 0.29589 | ZNF683   | zinc finger protein 683                                                                  |
| 1.456999114 | 0.00232 | 0.820265697 | 0.23417 | ZNF689   | zinc finger protein 689                                                                  |
| 1.582176198 | 0.01525 | 1.081474763 | 0.30829 | ZNF70    | zinc finger protein 70                                                                   |
| 1.345367209 | 0.00543 | 1.128182137 | 0.05192 | ZNF71    | zinc finger protein 71                                                                   |
| 1.367935304 | 0.02205 | 1.163120042 | 0.08032 | ZNF764   | zinc finger protein 764                                                                  |
| 1.325007017 | 0.03255 | 1.116512962 | 0.06714 | ZNF844   | zinc finger protein 844                                                                  |
| 1.151089491 | 0.04236 | 1.041021598 | 0.46996 | ZNF853   | zinc finger protein 853                                                                  |
| 0.712518807 | 0.00658 | 0.944747041 | 0.41689 | ZNF862   | zinc finger protein 862                                                                  |

|             |         |             |         |           |                                                    |
|-------------|---------|-------------|---------|-----------|----------------------------------------------------|
| 0,713012859 | 0,00754 | 0,934075198 | 0,22961 | ZNF883    | zinc finger protein 883                            |
| 0,659753955 | 0,0035  | 0,916368645 | 0,13154 | ZNFX1-AS1 | ZNFX1 antisense RNA 1 (non-protein coding)         |
| 0,645728675 | 0,00342 | 0,918276162 | 0,15307 | ZNFX1-AS1 | ZNFX1 antisense RNA 1 (non-protein coding)         |
| 0,599154511 | 0,00789 | 0,895025071 | 0,08544 | ZNFX1-AS1 | ZNFX1 antisense RNA 1 (non-protein coding)         |
| 0,803850991 | 0,0459  | 0,949442121 | 0,523   | ZNRD1-AS1 | ZNRD1 antisense RNA 1 (non-protein coding)         |
| 1,203303026 | 0,04333 | 1,044635763 | 0,36788 | ESCAN12   | zinc finger and SCAN domain containing 12          |
| 1,244011653 | 0,01812 | 1,133669413 | 0,06278 | ZSWIM3    | zinc finger, SWIM-type containing 3                |
| 0,73153561  | 0,00074 | 0,891928519 | 0,12306 | ZW10      | ZW10, kinetochore associated, homolog (Drosophila) |



Panel 3: Genes significantly regulated in chronic (CP), but not aggressive (AP) periodontitis (p<0.05).

| FC AP       | p AP    | FC CP       | p CP    | Symbol    | Name                                                                                                                         |
|-------------|---------|-------------|---------|-----------|------------------------------------------------------------------------------------------------------------------------------|
| 1,163120042 | 0,08638 | 1,084477409 | 0,03747 | A1CF      | APOBEC1 complementation factor                                                                                               |
| 1,074749173 | 0,5299  | 1,088242442 | 0,03597 | A2M       | alpha-2-macroglobulin                                                                                                        |
| 1,053361036 | 0,72888 | 0,84323111  | 0,0414  | AAGAB     | alpha- and gamma-adaptin binding protein                                                                                     |
| 0,993781093 | 0,96942 | 1,17609125  | 0,02748 | AAK1      | AP2 associated kinase 1                                                                                                      |
| 1,163120042 | 0,14681 | 1,132098902 | 0,04534 | AAK1      | AP2 associated kinase 1                                                                                                      |
| 1,106497353 | 0,22547 | 1,081474763 | 0,0346  | AAK1      | AP2 associated kinase 1                                                                                                      |
| 0,818469182 | 0,12368 | 1,097331938 | 0,04874 | AAK1      | AP2 associated kinase 1                                                                                                      |
| 1,150291893 | 0,5211  | 1,29145735  | 0,00006 | AARS      | alanyl-tRNA synthetase                                                                                                       |
| 0,683020128 | 0,09925 | 0,740206649 | 0,0005  | AASDH     | aminoadipate-semialdehyde dehydrogenase                                                                                      |
| 0,903752727 | 0,53546 | 0,794985251 | 0,00621 | AASDHPPPT | aminoadipate-semialdehyde dehydrogenase-phosphopantetheinyl transferase                                                      |
| 0,872362706 | 0,43959 | 0,803850991 | 0,00114 | AASDHPPPT | aminoadipate-semialdehyde dehydrogenase-phosphopantetheinyl transferase                                                      |
| 1,098092814 | 0,21538 | 1,178539408 | 0,00212 | ABCA1     | ATP-binding cassette, sub-family A (ABC1), member 1                                                                          |
| 1,148698355 | 0,38912 | 1,148698355 | 0,0296  | ABCA1     | ATP-binding cassette, sub-family A (ABC1), member 1                                                                          |
| 0,686342216 | 0,09496 | 1,748461493 | 0,00069 | ABCA5     | ATP-binding cassette, sub-family A (ABC1), member 5                                                                          |
| 0,737645729 | 0,41625 | 0,629378587 | 0,0116  | ABCA5     | ATP-binding cassette, sub-family A (ABC1), member 5                                                                          |
| 1,068065408 | 0,518   | 1,230291345 | 0,03594 | ABCA7     | ATP-binding cassette, sub-family A (ABC1), member 7                                                                          |
| 0,953959551 | 0,56294 | 0,918276162 | 0,04513 | ABCA8     | ATP-binding cassette, sub-family A (ABC1), member 8                                                                          |
| 1,035264924 | 0,64342 | 1,095052471 | 0,04544 | ABCA8     | ATP-binding cassette, sub-family A (ABC1), member 8                                                                          |
| 0,803850991 | 0,39995 | 0,639936207 | 0,00043 | ABCB10    | ATP-binding cassette, sub-family B (MDR/TRP), member 10                                                                      |
| 0,786762445 | 0,06313 | 0,883927531 | 0,04238 | ABCC1     | ATP-binding cassette, sub-family C (CFTR/MRP), member 1                                                                      |
| 1,096571589 | 0,19765 | 1,168777249 | 0,03789 | ABCC11    | ATP-binding cassette, sub-family C (CFTR/MRP), member 11                                                                     |
| 0,997922719 | 0,97592 | 0,929804943 | 0,04195 | ABCC13    | ATP-binding cassette, sub-family C (CFTR/MRP), member 13, pseudogene                                                         |
| 1,262252032 | 0,13606 | 1,256142381 | 0,01778 | ABCC3     | ATP-binding cassette, sub-family C (CFTR/MRP), member 3                                                                      |
| 1,101141598 | 0,34842 | 1,231144413 | 0,00182 | ABCC3     | ATP-binding cassette, sub-family C (CFTR/MRP), member 3                                                                      |
| 0,838568184 | 0,42826 | 1,238848698 | 0,00675 | ABCC5     | ATP-binding cassette, sub-family C (CFTR/MRP), member 5                                                                      |
| 1,127400412 | 0,19675 | 1,374588696 | 0,00026 | ABCD1     | ATP-binding cassette, sub-family D (ALD), member 1                                                                           |
| 0,681601304 | 0,10473 | 0,759962428 | 0,00293 | ABCD3     | ATP-binding cassette, sub-family D (ALD), member 3                                                                           |
| 1,17202284  | 0,05193 | 1,151887642 | 0,01583 | ABCD4     | ATP-binding cassette, sub-family D (ALD), member 4                                                                           |
| 0,701735863 | 0,06812 | 0,739693755 | 0,00104 | ABCE1     | ATP-binding cassette, sub-family E (OABP), member 1                                                                          |
| 0,796088099 | 0,05569 | 0,86154616  | 0,02029 | ABCF2     | ATP-binding cassette, sub-family F (GCN20), member 2                                                                         |
| 0,993092495 | 0,95069 | 1,22010051  | 0,00837 | ABCG2     | ATP-binding cassette, sub-family G (WHITE), member 2                                                                         |
| 1,077733145 | 0,42587 | 1,173648178 | 0,01294 | ABCG8     | ATP-binding cassette, sub-family G (WHITE), member 8                                                                         |
| 1,17772279  | 0,18468 | 1,243149669 | 0,00039 | ABHD1     | abhydrolase domain containing 1                                                                                              |
| 1,167967395 | 0,18041 | 1,332374825 | 0,00003 | ABHD11    | abhydrolase domain containing 11                                                                                             |
| 1,035982764 | 0,8336  | 1,147107024 | 0,03344 | ABHD12    | abhydrolase domain containing 12                                                                                             |
| 0,735093668 | 0,06228 | 0,649769531 | 0,00002 | ABHD12    | abhydrolase domain containing 12                                                                                             |
| 1,048989328 | 0,79228 | 0,784584098 | 0,04349 | ABHD13    | abhydrolase domain containing 13                                                                                             |
| 1,035982764 | 0,84512 | 0,794985251 | 0,0111  | ABHD13    | abhydrolase domain containing 13                                                                                             |
| 1,027401439 | 0,90844 | 1,361314116 | 0,02243 | ABHD14B   | abhydrolase domain containing 14B                                                                                            |
| 0,961260928 | 0,73138 | 0,885153765 | 0,04316 | ABHD16A   | abhydrolase domain containing 16A                                                                                            |
| 1,271031689 | 0,10939 | 1,251796459 | 0,00064 | ABHD2     | abhydrolase domain containing 2                                                                                              |
| 0,924022572 | 0,64582 | 0,854409741 | 0,04997 | ABHD2     | abhydrolase domain containing 2                                                                                              |
| 1,254402205 | 0,08927 | 1,158292806 | 0,00742 | ABHD2     | abhydrolase domain containing 2                                                                                              |
| 1,204137381 | 0,10721 | 1,209155676 | 0,00059 | ABHD6     | abhydrolase domain containing 6                                                                                              |
| 0,883315051 | 0,47038 | 0,775930854 | 0,00038 | ABHD6     | abhydrolase domain containing 6                                                                                              |
| 1,178539408 | 0,16015 | 1,164733586 | 0,01318 | ABHD8     | abhydrolase domain containing 8                                                                                              |
| 0,669891801 | 0,06447 | 0,723969086 | 0,00016 | ABI1      | abl-interactor 1                                                                                                             |
| 1,106497353 | 0,17614 | 1,17772279  | 0,00494 | ABI2      | abl-interactor 2                                                                                                             |
| 1,108800644 | 0,31553 | 1,17609125  | 0,00529 | ABI2      | abl-interactor 2                                                                                                             |
| 0,618995145 | 0,18295 | 0,729510172 | 0,02867 | ABI3BP    | ABI family, member 3 (NESH) binding protein                                                                                  |
| 0,886381699 | 0,15598 | 0,924663278 | 0,04625 | ABL2      | v-abl Abelson murine leukemia viral oncogene homolog 2                                                                       |
| 0,995159722 | 0,9517  | 0,865136691 | 0,04589 | ABO       | ABO blood group (transferase A, alpha 1-3-N-acetylgalactosaminyltransferase; transferase B, alpha 1-3-galactosyltransferase) |
| 1,237132479 | 0,05757 | 1,153485605 | 0,00285 | ABP1      | amiloride binding protein 1 (amine oxidase (copper-containing))                                                              |
| 1,190031696 | 0,07472 | 1,244874235 | 0,02706 | ABTB1     | ankyrin repeat and BTB (POZ) domain containing 1                                                                             |
| 0,996540263 | 0,97235 | 1,171210181 | 0,00239 | ABTB1     | ankyrin repeat and BTB (POZ) domain containing 1                                                                             |
| 1,265756594 | 0,08151 | 1,364147835 | 0,00069 | ABTB1     | ankyrin repeat and BTB (POZ) domain containing 1                                                                             |
| 0,873572896 | 0,22141 | 0,870550563 | 0,02976 | ACAA1     | acetyl-CoA acyltransferase 1                                                                                                 |
| 1,168777249 | 0,19051 | 1,281647924 | 0,00045 | ACACB     | acetyl-CoA carboxylase beta                                                                                                  |
| 0,993781093 | 0,94431 | 1,17609125  | 0,0043  | ACACB     | acetyl-CoA carboxylase beta                                                                                                  |
| 0,992404375 | 0,94659 | 1,143930973 | 0,0264  | ACAD10    | acyl-CoA dehydrogenase family, member 10                                                                                     |
| 0,880869374 | 0,28185 | 0,841479482 | 0,0219  | ACADL     | acyl-CoA dehydrogenase, long chain                                                                                           |
| 0,809442217 | 0,10064 | 0,803850991 | 0,01571 | ACADSB    | acyl-CoA dehydrogenase, short/branched chain                                                                                 |
| 0,917004043 | 0,71353 | 0,795536484 | 0,04122 | ACADSB    | acyl-CoA dehydrogenase, short/branched chain                                                                                 |
| 1,153485605 | 0,09641 | 1,209155676 | 0,01214 | ACAN      | aggrecan                                                                                                                     |
| 0,824733549 | 0,40483 | 0,717474767 | 0,00277 | ACAP2     | ArfGAP with coiled-coil, ankyrin repeat and PH domains 2                                                                     |
| 1,067325338 | 0,64516 | 0,824162085 | 0,00301 | ACAP2     | ArfGAP with coiled-coil, ankyrin repeat and PH domains 2                                                                     |
| 0,762072415 | 0,07931 | 0,855595026 | 0,02323 | ACAT1     | acetyl-CoA acetyltransferase 1                                                                                               |
| 0,575145947 | 0,12248 | 0,702222438 | 0,00009 | ACBD3     | acyl-CoA binding domain containing 3                                                                                         |
| 0,89875127  | 0,59182 | 0,866336856 | 0,0022  | ACBD3     | acyl-CoA binding domain containing 3                                                                                         |
| 0,757858283 | 0,2312  | 0,701735863 | 0,00102 | ACBD5     | acyl-CoA binding domain containing 5                                                                                         |
| 1,151887642 | 0,09865 | 1,080725402 | 0,03558 | ACCN1     | amiloride-sensitive cation channel 1, neuronal                                                                               |
| 1,123499903 | 0,16243 | 1,197478705 | 0,00237 | ACCN2     | amiloride-sensitive cation channel 2, neuronal                                                                               |
| 1,139183377 | 0,20087 | 1,152686347 | 0,01285 | ACCN4     | amiloride-sensitive cation channel 4, pituitary                                                                              |
| 1,030968319 | 0,82636 | 0,790589117 | 0,00639 | ACN9      | ACN9 homolog (S. cerevisiae)                                                                                                 |
| 1,093535457 | 0,30203 | 1,159095952 | 0,0048  | ACO2      | aconitase 2, mitochondrial                                                                                                   |
| 1,065108203 | 0,52809 | 1,155886707 | 0,02431 | ACOT11    | acyl-CoA thioesterase 11                                                                                                     |
| 0,787307977 | 0,13746 | 0,828170661 | 0,00582 | ACOT7     | acyl-CoA thioesterase 7                                                                                                      |
| 0,967947027 | 0,73267 | 1,101141598 | 0,04769 | ACOT8     | acyl-CoA thioesterase 8                                                                                                      |
| 0,870550563 | 0,27843 | 0,866336856 | 0,02959 | ACOT8     | acyl-CoA thioesterase 8                                                                                                      |
| 0,737645729 | 0,0928  | 0,831622098 | 0,01129 | ACOX3     | acyl-CoA oxidase 3, pristanoyl                                                                                               |
| 0,831622098 | 0,15363 | 0,859756486 | 0,02112 | ACP1      | acid phosphatase 1, soluble                                                                                                  |
| 1,400556321 | 0,0754  | 1,390881972 | 0,00003 | ACP2      | acid phosphatase 2, lysosomal                                                                                                |
| 0,822450069 | 0,09977 | 0,793883931 | 0,01195 | ACPP      | acid phosphatase, prostate                                                                                                   |
| 0,967947027 | 0,81822 | 0,791137301 | 0,00091 | ACRC      | acidic repeat containing                                                                                                     |
| 1,094293701 | 0,359   | 1,114193651 | 0,03733 | ACRV1     | acrosomal vesicle protein 1                                                                                                  |
| 1,173648178 | 0,11082 | 1,121166078 | 0,01364 | ACRV1     | acrosomal vesicle protein 1                                                                                                  |
| 1,156688184 | 0,24483 | 1,17772279  | 0,01867 | ACSF3     | acyl-CoA synthetase family member 3                                                                                          |
| 0,735093668 | 0,29096 | 0,767905135 | 0,01679 | ACSL1     | acyl-CoA synthetase long-chain family member 1                                                                               |
| 0,820172911 | 0,46033 | 0,819036698 | 0,03783 | ACSL3     | acyl-CoA synthetase long-chain family member 3                                                                               |
| 0,644834125 | 0,07963 | 0,744322628 | 0,00234 | ACSL3     | acyl-CoA synthetase long-chain family member 3                                                                               |
| 1,144724161 | 0,47272 | 1,354724977 | 0,01404 | ACSL4     | acyl-CoA synthetase long-chain family member 4                                                                               |
| 1,116512962 | 0,14199 | 1,083725967 | 0,03804 | ACSL6     | acyl-CoA synthetase long-chain family member 6                                                                               |
| 0,964598185 | 0,7247  | 1,139973273 | 0,02382 | ACSL6     | acyl-CoA synthetase long-chain family member 6                                                                               |
| 1,268391399 | 0,09405 | 1,209994089 | 0,00395 | ACSS1     | acyl-CoA synthetase short-chain family member 1                                                                              |
| 1,127400412 | 0,26594 | 1,144724161 | 0,01145 | ACTC1     | actin, alpha, cardiac muscle 1                                                                                               |
| 1,29145735  | 0,08755 | 1,17772279  | 0,00699 | ACTG2     | actin, gamma 2, smooth muscle, enteric                                                                                       |
| 0,826450318 | 0,32045 | 0,795536484 | 0,00265 | ACTL6A    | actin-like 6A                                                                                                                |
| 1,081474763 | 0,36407 | 1,157490217 | 0,01178 | ACTL6B    | actin-like 6B                                                                                                                |
| 1,065108203 | 0,50921 | 1,156688184 | 0,01668 | ACTN1     | actinin, alpha 1                                                                                                             |
| 1,095811766 | 0,30059 | 1,137605228 | 0,04828 | ACTN2     | actinin, alpha 2                                                                                                             |
| 0,897510051 | 0,77688 | 0,87417862  | 0,02664 | ACTR2     | ARP2 actin-related protein 2 homolog (yeast)                                                                                 |
| 0,688247801 | 0,09477 | 0,828170661 | 0,02595 | ACTR2     | ARP2 actin-related protein 2 homolog (yeast)                                                                                 |

|             |         |             |         |             |                                                                                               |
|-------------|---------|-------------|---------|-------------|-----------------------------------------------------------------------------------------------|
| 0,860949188 | 0,30476 | 0,821880187 | 0,00049 | ACTR3       | ARP3 actin-related protein 3 homolog (yeast)                                                  |
| 0,91319825  | 0,72746 | 0,648869383 | 0,00001 | ACTR3       | ARP3 actin-related protein 3 homolog (yeast)                                                  |
| 0,889458994 | 0,41566 | 0,69399636  | 0,00006 | ACTR3B      | ARP3 actin-related protein 3 homolog B (yeast)                                                |
| 1,057018041 | 0,62813 | 1,156688184 | 0,04361 | ACTR3BP2    | ARP3 actin-related protein 3 homolog B (yeast) pseudogene 2                                   |
| 0,951977908 | 0,79408 | 0,759962428 | 0,00284 | ACTR6       | ARP6 actin-related protein 6 homolog (yeast)                                                  |
| 0,975355462 | 0,87753 | 0,777007269 | 0,00295 | ACTR8       | ARP8 actin-related protein 8 homolog (yeast)                                                  |
| 1,102669163 | 0,24757 | 1,092020546 | 0,04891 | ACTR8       | ARP8 actin-related protein 8 homolog (yeast)                                                  |
| 1,062895674 | 0,56613 | 1,121943481 | 0,00915 | ACTR2       | actin-related protein T2                                                                      |
| 0,946713631 | 0,66321 | 1,219255094 | 0,04947 | ACVR1B      | activin A receptor, type IB                                                                   |
| 0,885153765 | 0,41524 | 0,839731493 | 0,02039 | ACVR2A      | activin A receptor, type IIA                                                                  |
| 1,140763716 | 0,36696 | 1,167967395 | 0,01243 | ACVR2B      | activin A receptor, type IIB                                                                  |
| 0,811127156 | 0,10242 | 0,846158597 | 0,00959 | ACYP1       | acylphosphatase 1, erythrocyte (common) type                                                  |
| 0,934975198 | 0,39608 | 1,147107024 | 0,0115  | ADAD1       | adenosine deaminase domain containing 1 (testis-specific)                                     |
| 0,863938187 | 0,60936 | 0,691116103 | 0,00986 | ADAM1       | ADAM metalloproteinase domain 1, pseudogene                                                   |
| 1,272794935 | 0,06284 | 1,313121125 | 0,03986 | ADAM10      | ADAM metalloproteinase domain 10                                                              |
| 1,255271991 | 0,13801 | 1,455989549 | 0,01782 | ADAM12      | ADAM metalloproteinase domain 12                                                              |
| 0,908778116 | 0,57635 | 1,237132479 | 0,00805 | ADAM15      | ADAM metalloproteinase domain 15                                                              |
| 1,012554807 | 0,86622 | 1,10343374  | 0,04724 | ADAM19      | ADAM metalloproteinase domain 19                                                              |
| 1,185092771 | 0,05899 | 1,168777249 | 0,00151 | ADAM22      | ADAM metalloproteinase domain 22                                                              |
| 0,739181216 | 0,34464 | 0,692074858 | 0,00256 | ADAM23      | ADAM metalloproteinase domain 23                                                              |
| 0,872967591 | 0,51496 | 0,654289036 | 0,00039 | ADAM23      | ADAM metalloproteinase domain 23                                                              |
| 1,010451446 | 0,89424 | 1,133669413 | 0,00603 | ADAM29      | ADAM metalloproteinase domain 29                                                              |
| 1,127400412 | 0,315   | 1,121943481 | 0,02894 | ADAM8       | ADAM metalloproteinase domain 8                                                               |
| 1,093535457 | 0,46932 | 1,271031689 | 0,00845 | ADAM8       | ADAM metalloproteinase domain 8                                                               |
| 0,891310496 | 0,58393 | 0,809442217 | 0,02107 | ADAM9       | ADAM metalloproteinase domain 9                                                               |
| 1,36983298  | 0,09856 | 1,466116757 | 0,0097  | ADAMTS1     | ADAM metalloproteinase with thrombospondin type 1 motif, 1                                    |
| 1,185092771 | 0,18175 | 1,224336392 | 0,03612 | ADAMTS12    | ADAM metalloproteinase with thrombospondin type 1 motif, 12                                   |
| 1,188383105 | 0,16486 | 1,242288282 | 0,01824 | ADAMTS15    | ADAM metalloproteinase with thrombospondin type 1 motif, 15                                   |
| 0,813943185 | 0,17236 | 0,767905135 | 0,00071 | ADAMTS17    | ADAM metalloproteinase with thrombospondin type 1 motif, 17                                   |
| 1,680627504 | 0,05821 | 1,25092908  | 0,00694 | ADAMTS18    | ADAM metalloproteinase with thrombospondin type 1 motif, 18                                   |
| 1,189207115 | 0,30797 | 1,277213759 | 0,01116 | ADAMTS2     | ADAM metalloproteinase with thrombospondin type 1 motif, 2                                    |
| 1,044635763 | 0,65203 | 1,126619228 | 0,0348  | ADAMTS2     | ADAM metalloproteinase with thrombospondin type 1 motif, 2                                    |
| 1,174461971 | 0,39348 | 1,326845141 | 0,03788 | ADAMTS2     | ADAM metalloproteinase with thrombospondin type 1 motif, 2                                    |
| 1,25353302  | 0,0591  | 1,226884977 | 0,01273 | ADAMTS20    | ADAM metalloproteinase with thrombospondin type 1 motif, 20                                   |
| 1,32317144  | 0,1417  | 1,281647924 | 0,00142 | ADAMTS6     | ADAM metalloproteinase with thrombospondin type 1 motif, 6                                    |
| 1,134455485 | 0,13827 | 1,225185332 | 0,01036 | ADAMTS9     | ADAM metalloproteinase with thrombospondin type 1 motif, 9                                    |
| 1,185914499 | 0,19924 | 1,636938363 | 0,00007 | ADAMTS9     | ADAM metalloproteinase with thrombospondin type 1 motif, 9                                    |
| 1,063632673 | 0,54178 | 1,105730653 | 0,04643 | ADAMTS9-AS2 | ADAMTS9 antisense RNA 2 (non-protein coding)                                                  |
| 0,977385766 | 0,74375 | 1,136029265 | 0,02101 | ADAMTSL1    | ADAMTS-like 1                                                                                 |
| 1,478362431 | 0,12398 | 1,476314406 | 0,00273 | ADAMTSL4    | ADAMTS-like 4                                                                                 |
| 1,150291893 | 0,26485 | 1,302244419 | 0,00019 | ADAP1       | ArfGAP with dual PH domains 1                                                                 |
| 1,172022284 | 0,24599 | 1,125838586 | 0,02366 | ADARB1      | adenosine deaminase, RNA-specific, B1                                                         |
| 1,133669413 | 0,28434 | 1,171210181 | 0,00568 | ADC         | arginine decarboxylase                                                                        |
| 1,172834949 | 0,06693 | 1,129747215 | 0,03745 | ADCK1       | aarF domain containing kinase 1                                                               |
| 0,893785162 | 0,33456 | 0,847332435 | 0,02553 | ADCK2       | aarF domain containing kinase 2                                                               |
| 1,25962998  | 0,07793 | 1,169587664 | 0,00857 | ADCK2       | aarF domain containing kinase 2                                                               |
| 0,815637493 | 0,09507 | 0,853226098 | 0,00897 | ADCK2       | aarF domain containing kinase 2                                                               |
| 1,172834949 | 0,13245 | 1,144724161 | 0,01111 | ADCK3       | aarF domain containing kinase 3                                                               |
| 0,950659101 | 0,43937 | 0,901875378 | 0,02131 | ADCK4       | aarF domain containing kinase 4                                                               |
| 1,151887642 | 0,23503 | 1,2397077   | 0,0003  | ADCK4       | aarF domain containing kinase 4                                                               |
| 1,088242442 | 0,35979 | 1,115739322 | 0,03017 | ADCY1       | adenylate cyclase 1 (brain)                                                                   |
| 1,037419937 | 0,7013  | 1,181811547 | 0,00328 | ADCY2       | adenylate cyclase 2 (brain)                                                                   |
| 1,125058485 | 0,25864 | 1,196648963 | 0,03235 | ADCY3       | adenylate cyclase 3                                                                           |
| 1,282536603 | 0,0726  | 1,443929196 | 0,00035 | ADCY4       | adenylate cyclase 4                                                                           |
| 1,132883885 | 0,17412 | 1,151887642 | 0,01849 | ADCY5       | adenylate cyclase 5                                                                           |
| 1,021720083 | 0,84987 | 1,22858698  | 0,00549 | ADCY6       | adenylate cyclase 6                                                                           |
| 0,917004043 | 0,69416 | 0,876605721 | 0,02522 | ADCY7       | adenylate cyclase 7                                                                           |
| 0,872967591 | 0,13287 | 0,785128119 | 0,00082 | ADCY9       | adenylate cyclase 9                                                                           |
| 1,0181852   | 0,84039 | 1,114966219 | 0,0165  | ADCYAP1R1   | adenylate cyclase activating polypeptide 1 (pituitary) receptor type I                        |
| 1,130530567 | 0,28226 | 1,237990291 | 0,01535 | ADCYAP1R1   | adenylate cyclase activating polypeptide 1 (pituitary) receptor type I                        |
| 1,172022284 | 0,11509 | 1,243149669 | 0,00915 | ADD2        | adducin 2 (beta)                                                                              |
| 1,139183377 | 0,12359 | 1,191682575 | 0,0065  | ADD2        | adducin 2 (beta)                                                                              |
| 1,116512962 | 0,1654  | 1,155886707 | 0,00659 | ADD2        | adducin 2 (beta)                                                                              |
| 1,076986376 | 0,36941 | 1,183451022 | 0,00755 | ADD3        | adducin 3 (gamma)                                                                             |
| 0,922103118 | 0,38795 | 0,91319825  | 0,00884 | ADH4        | alcohol dehydrogenase 4 (class II), pi polypeptide                                            |
| 1,113421618 | 0,34319 | 1,22010051  | 0,00192 | ADHFE1      | alcohol dehydrogenase, iron containing, 1                                                     |
| 0,795536484 | 0,46083 | 0,666187413 | 0,00435 | ADK         | adenosine kinase                                                                              |
| 1,118837101 | 0,22493 | 1,152686347 | 0,03519 | ADM2        | adrenomedullin 2                                                                              |
| 0,856188285 | 0,29425 | 0,764718139 | 0,01257 | ADNP        | activity-dependent neuroprotector homeobox                                                    |
| 0,746906729 | 0,10228 | 0,743291492 | 0,00059 | ADNP2       | ADNP homeobox 2                                                                               |
| 0,833931044 | 0,25561 | 0,788400174 | 0,00506 | ADNP2       | ADNP homeobox 2                                                                               |
| 0,927230546 | 0,74889 | 0,815072332 | 0,01118 | ADO         | 2-aminoethanethiol (cysteamine) dioxygenase                                                   |
| 0,886996305 | 0,31072 | 0,87539133  | 0,02549 | ADO         | 2-aminoethanethiol (cysteamine) dioxygenase                                                   |
| 1,114966219 | 0,20318 | 1,141554707 | 0,03648 | ADORA1      | adenosine A1 receptor                                                                         |
| 1,173648178 | 0,16692 | 1,149494848 | 0,04872 | ADORA3      | adenosine A3 receptor                                                                         |
| 1,113421618 | 0,28392 | 1,151887642 | 0,01383 | ADPGK       | ADP-dependent glucokinase                                                                     |
| 1,169587664 | 0,12154 | 1,209994089 | 0,0143  | ADPRH       | ADP-ribosylarginine hydrolase                                                                 |
| 0,774319028 | 0,09713 | 0,816768991 | 0,00083 | ADPRHL2     | ADP-ribosylhydrolase like 2                                                                   |
| 0,773782497 | 0,06334 | 0,784040454 | 0,00321 | ADRB2       | adrenergic, beta-2-, receptor, surface                                                        |
| 1,057750964 | 0,57339 | 1,199139914 | 0,00535 | ADRB3       | adrenergic, beta-3-, receptor                                                                 |
| 1,162314108 | 0,14815 | 1,281647924 | 0,00026 | ADRBK1      | adrenergic, beta, receptor kinase 1                                                           |
| 1,194991205 | 0,16215 | 1,199139914 | 0,01139 | ADRBK2      | adrenergic, beta, receptor kinase 2                                                           |
| 0,852634892 | 0,4539  | 0,90000193  | 0,04163 | ADSL        | adenylosuccinate lyase                                                                        |
| 1,00765376  | 0,97639 | 1,45296505  | 0,00656 | AEBP1       | AE binding protein 1                                                                          |
| 0,796640096 | 0,40286 | 0,714992493 | 0,00333 | AEBP2       | AE binding protein 2                                                                          |
| 1,094293701 | 0,44172 | 1,159899655 | 0,02573 | AFAP1-AS1   | AFAP1 antisense RNA 1 (non-protein coding)                                                    |
| 0,748980467 | 0,0534  | 0,79774524  | 0,00068 | AFF1        | AF4/FMR2 family, member 1                                                                     |
| 0,740206649 | 0,08866 | 0,784040454 | 0,00572 | AFF4        | AF4/FMR2 family, member 4                                                                     |
| 0,843815796 | 0,0997  | 0,824733549 | 0,00736 | AFG3L2      | AFG3 ATPase family gene 3-like 2 (S. cerevisiae)                                              |
| 0,806082831 | 0,34167 | 0,770037174 | 0,00003 | AFTPH       | aftiphilin                                                                                    |
| 0,842062954 | 0,08376 | 0,849096246 | 0,01985 | AGA         | aspartylglucosaminidase                                                                       |
| 0,822450069 | 0,32499 | 0,716977624 | 0,00599 | AGA         | aspartylglucosaminidase                                                                       |
| 0,819604608 | 0,13161 | 0,770037174 | 0,00538 | AGAP1       | ArfGAP with GTPase domain, ankyrin repeat and PH domain 1                                     |
| 0,78024548  | 0,14755 | 0,722966147 | 0,00109 | AGAP4       | ArfGAP with GTPase domain, ankyrin repeat and PH domain 4                                     |
| 0,983502074 | 0,91897 | 1,132883885 | 0,01087 | AGBL5       | ATP/GTP binding protein-like 5                                                                |
| 1,060687741 | 0,4502  | 0,859160755 | 0,00106 | AGBL5       | ATP/GTP binding protein-like 5                                                                |
| 1,048262476 | 0,67765 | 1,109569472 | 0,02203 | AGER        | advanced glycosylation end product-specific receptor                                          |
| 1,034547582 | 0,62317 | 1,136029265 | 0,04395 | AGFG2       | ArfGAP with FG repeats 2                                                                      |
| 1,062895674 | 0,42024 | 1,128182137 | 0,02762 | AGFG2       | ArfGAP with FG repeats 2                                                                      |
| 0,738669032 | 0,15955 | 0,816768991 | 0,04024 | AGGF1       | angiogenic factor with G patch and FHA domains 1                                              |
| 0,782954296 | 0,18352 | 0,793333843 | 0,00165 | AGGF1       | angiogenic factor with G patch and FHA domains 1                                              |
| 1,082224645 | 0,73287 | 0,84323111  | 0,00666 | AGK         | acylglycerol kinase                                                                           |
| 0,844986384 | 0,34157 | 0,778624691 | 0,00286 | AGL         | amylo-alpha-1, 6-glucosidase, 4-alpha-glucanotransferase                                      |
| 1,255271991 | 0,14968 | 1,372684431 | 0,01097 | AGPAT1      | 1-acylglycerol-3-phosphate O-acyltransferase 1 (lysophosphatidic acid acyltransferase, alpha) |

|             |         |             |         |          |                                                                                                                        |
|-------------|---------|-------------|---------|----------|------------------------------------------------------------------------------------------------------------------------|
| 1,101905116 | 0,52264 | 1,368883813 | 0,0002  | AGPAT1   | 1-acylglycerol-3-phosphate O-acyltransferase 1 (lysophosphatidic acid acyltransferase, alpha)                          |
| 0,796080899 | 0,14472 | 0,811127156 | 0,0108  | AGPAT2   | 1-acylglycerol-3-phosphate O-acyltransferase 2 (lysophosphatidic acid acyltransferase, beta)                           |
| 0,731028724 | 0,05153 | 0,849684999 | 0,01239 | AGPAT3   | 1-acylglycerol-3-phosphate O-acyltransferase 3                                                                         |
| 0,816203046 | 0,07144 | 0,79774524  | 0,00049 | AGPAT3   | 1-acylglycerol-3-phosphate O-acyltransferase 3                                                                         |
| 0,799960128 | 0,23605 | 0,713012859 | 0,00008 | AGPAT5   | 1-acylglycerol-3-phosphate O-acyltransferase 5 (lysophosphatidic acid acyltransferase, epsilon)                        |
| 0,787307977 | 0,07759 | 0,787853886 | 0,00029 | AGPAT5   | 1-acylglycerol-3-phosphate O-acyltransferase 5 (lysophosphatidic acid acyltransferase, epsilon)                        |
| 0,685866644 | 0,09243 | 0,652477474 | 0,00126 | AGPAT9   | 1-acylglycerol-3-phosphate O-acyltransferase 9                                                                         |
| 0,834509281 | 0,3381  | 0,859756486 | 0,01165 | AGPS     | alkylglycerone phosphate synthase                                                                                      |
| 0,988285652 | 0,9634  | 0,710053679 | 0,00729 | AGPS     | alkylglycerone phosphate synthase                                                                                      |
| 1,181811547 | 0,18731 | 1,229438867 | 0,00512 | AGR2     | anterior gradient homolog 2 (Xenopus laevis)                                                                           |
| 1,280759861 | 0,18856 | 1,380317353 | 0,01706 | AGRN     | agrin                                                                                                                  |
| 1,325007017 | 0,23031 | 1,414213562 | 0,00297 | AGRN     | agrin                                                                                                                  |
| 1,210833084 | 0,12414 | 1,305859787 | 0,00932 | AGT      | angiotensinogen (serpin peptidase inhibitor, clade A, member 8)                                                        |
| 1,035264924 | 0,8976  | 1,375541818 | 0,00088 | AGTRAP   | angiotensin II receptor-associated protein                                                                             |
| 1,038139271 | 0,70728 | 1,265756594 | 0,00069 | AGTRAP   | angiotensin II receptor-associated protein                                                                             |
| 1,086734863 | 0,24305 | 1,142346247 | 0,02299 | AGXT     | alanine-glyoxylate aminotransferase                                                                                    |
| 1,121166078 | 0,39947 | 1,204972315 | 0,0285  | AGXT     | alanine-glyoxylate aminotransferase                                                                                    |
| 0,968618189 | 0,86981 | 0,745872013 | 0,0003  | AHCTF1   | AT hook containing transcription factor 1                                                                              |
| 0,953959551 | 0,81419 | 0,854409741 | 0,02736 | AHCYL1   | adenosylhomocysteinase-like 1                                                                                          |
| 1,167967395 | 0,07804 | 1,186736798 | 0,00312 | AHNAK    | AHNAK nucleoprotein                                                                                                    |
| 1,041743429 | 0,72209 | 0,852634892 | 0,02407 | AHSA2    | AHA1, activator of heat shock 90kDa protein ATPase homolog 2 (yeast)                                                   |
| 1,151887642 | 0,06956 | 1,155085785 | 0,03428 | AHSP     | alpha hemoglobin stabilizing protein                                                                                   |
| 1,095052471 | 0,34433 | 1,138394029 | 0,00548 | AICDA    | activation-induced cytidine deaminase                                                                                  |
| 0,81056512  | 0,17672 | 0,906890329 | 0,01641 | AIDA     | axin interactor, dorsalization associated                                                                              |
| 1,306765254 | 0,2335  | 1,578987773 | 0,00019 | AIF1     | allograft inflammatory factor 1                                                                                        |
| 1,378405153 | 0,07815 | 1,481439798 | 0,00039 | AIF1     | allograft inflammatory factor 1                                                                                        |
| 1,072516617 | 0,62985 | 1,271031689 | 0,00055 | AIFM2    | apoptosis-inducing factor, mitochondrion-associated, 2                                                                 |
| 0,644834125 | 0,05546 | 0,777546036 | 0,00728 | AIM1     | absent in melanoma 1                                                                                                   |
| 0,694477568 | 0,10632 | 0,643048742 | 0,00038 | AIMP1    | aminoacyl tRNA synthetase complex-interacting multifunctional protein 1                                                |
| 1,385109468 | 0,16896 | 1,422077411 | 0       | AIP      | aryl hydrocarbon receptor interacting protein                                                                          |
| 1,333298677 | 0,05939 | 1,278099363 | 0,00146 | AIP      | aryl hydrocarbon receptor interacting protein                                                                          |
| 0,991716731 | 0,91988 | 1,175276328 | 0,03509 | AIRE     | autoimmune regulator                                                                                                   |
| 1,143138335 | 0,23828 | 1,182631    | 0,02422 | AK1      | adenylate kinase 1                                                                                                     |
| 0,777007269 | 0,15797 | 0,765778999 | 0,01104 | AK2      | adenylate kinase 2                                                                                                     |
| 0,732042848 | 0,12745 | 0,69399636  | 0,00753 | AK3      | adenylate kinase 3                                                                                                     |
| 0,594191553 | 0,06309 | 0,689202576 | 0,00013 | AK4      | adenylate kinase 4                                                                                                     |
| 1,126619228 | 0,2152  | 1,149494848 | 0,0066  | AK7      | adenylate kinase 7                                                                                                     |
| 1,035264924 | 0,76189 | 1,130530567 | 0,01706 | AK8      | adenylate kinase 8                                                                                                     |
| 0,768437591 | 0,22212 | 0,795536484 | 0,01945 | AKAP1    | A kinase (PRKA) anchor protein 1                                                                                       |
| 1,001387256 | 0,98514 | 0,91383145  | 0,0117  | AKAP14   | A kinase (PRKA) anchor protein 14                                                                                      |
| 1,156688184 | 0,09807 | 1,144724161 | 0,00996 | AKAP5    | A kinase (PRKA) anchor protein 5                                                                                       |
| 0,870550563 | 0,41476 | 0,882091365 | 0,01425 | AKAP8    | A kinase (PRKA) anchor protein 8                                                                                       |
| 0,874784765 | 0,19939 | 0,709561678 | 0       | AKAP8L   | A kinase (PRKA) anchor protein 8-like                                                                                  |
| 0,717474767 | 0,06059 | 0,780786493 | 0,00148 | AKAP9    | A kinase (PRKA) anchor protein (yotiao) 9                                                                              |
| 1,091263877 | 0,36559 | 1,230291345 | 0,0109  | AKIP1    | A kinase (PRKA) interacting protein 1                                                                                  |
| 0,914465089 | 0,81202 | 0,903752727 | 0,04469 | AKIRIN1  | akirin 1                                                                                                               |
| 1,020304659 | 0,79907 | 0,917639882 | 0,01575 | AKNAD1   | AKNA domain containing 1                                                                                               |
| 1,261377409 | 0,22899 | 1,277213759 | 0,0001  | AKR1A1   | aldo-keto reductase family 1, member A1 (aldehyde reductase)                                                           |
| 0,942784536 | 0,7411  | 0,807201057 | 0,00561 | AKR1C1   | aldo-keto reductase family 1, member C1 (dihydrodiol dehydrogenase 1; 20-alpha (3-alpha)-hydroxysteroid dehydrogenase) |
| 0,855595026 | 0,38396 | 0,854409741 | 0,01717 | AKR7A2   | aldo-keto reductase family 7, member A2 (afatoxin aldehyde reductase)                                                  |
| 0,929160674 | 0,42951 | 1,127400412 | 0,03422 | AKR7A3   | aldo-keto reductase family 7, member A3 (afatoxin aldehyde reductase)                                                  |
| 1,019569472 | 0,33417 | 1,190031696 | 0,02114 | AKT2     | v-akt murine thymoma viral oncogene homolog 2                                                                          |
| 1,298638603 | 0,06294 | 1,223488041 | 0,03014 | AKT3     | v-akt murine thymoma viral oncogene homolog 3 (protein kinase B, gamma)                                                |
| 1,006955555 | 0,93162 | 1,141554707 | 0,02263 | AKT3     | v-akt murine thymoma viral oncogene homolog 3 (protein kinase B, gamma)                                                |
| 1,049716684 | 0,59284 | 1,279872414 | 0,00352 | AKT3     | v-akt murine thymoma viral oncogene homolog 3 (protein kinase B, gamma)                                                |
| 0,880869374 | 0,23863 | 0,838568184 | 0,01307 | AKTIP    | AKT interacting protein                                                                                                |
| 0,996540263 | 0,97395 | 1,163926534 | 0,02211 | ALCAM    | activated leukocyte cell adhesion molecule                                                                             |
| 1,121166078 | 0,44986 | 1,214194884 | 0,03064 | ALCAM    | activated leukocyte cell adhesion molecule                                                                             |
| 1,151089491 | 0,28698 | 1,306765254 | 0,00124 | ALDH1L1  | aldehyde dehydrogenase 1 family, member L1                                                                             |
| 0,980099415 | 0,83917 | 1,190031696 | 0,00149 | ALDH1L2  | aldehyde dehydrogenase 1 family, member L2                                                                             |
| 1,000693387 | 0,9947  | 1,180992661 | 0,01971 | ALDH3B1  | aldehyde dehydrogenase 3 family, member B1                                                                             |
| 1,085229372 | 0,52965 | 1,234562607 | 0,00276 | ALDH3B1  | aldehyde dehydrogenase 3 family, member B1                                                                             |
| 1,026689546 | 0,8208  | 0,87175824  | 0,01485 | ALDH7A1  | aldehyde dehydrogenase 7 family, member A1                                                                             |
| 1,204137381 | 0,09091 | 1,231998073 | 0,03211 | ALDOB    | aldolase B, fructose-bisphosphate                                                                                      |
| 1,110338834 | 0,25489 | 1,193335743 | 0,00073 | ALDOB    | aldolase B, fructose-bisphosphate                                                                                      |
| 1,171210181 | 0,07497 | 1,146312186 | 0,01443 | ALDOB    | aldolase B, fructose-bisphosphate                                                                                      |
| 1,194991205 | 0,52231 | 0,782411782 | 0,03021 | ALG10B   | asparagine-linked glycosylation 10, alpha-1,2-glucosyltransferase homolog B (yeast)                                    |
| 1,041021598 | 0,74126 | 0,806641759 | 0,02391 | ALG10B   | asparagine-linked glycosylation 10, alpha-1,2-glucosyltransferase homolog B (yeast)                                    |
| 0,986232704 | 0,94201 | 0,838568184 | 0,02858 | ALG13    | asparagine-linked glycosylation 13 homolog (S. cerevisiae)                                                             |
| 0,905633983 | 0,59365 | 0,744322628 | 0,00019 | ALG13    | asparagine-linked glycosylation 13 homolog (S. cerevisiae)                                                             |
| 0,911933166 | 0,61522 | 0,91383145  | 0,03817 | ALG6     | asparagine-linked glycosylation 6, alpha-1,3-glucosyltransferase homolog (S. cerevisiae)                               |
| 1,044635763 | 0,74485 | 1,128182137 | 0,01447 | ALG8     | asparagine-linked glycosylation 8, alpha-1,3-glucosyltransferase homolog (S. cerevisiae)                               |
| 1,041021598 | 0,58512 | 1,140763716 | 0,02015 | ALK      | anaplastic lymphoma receptor tyrosine kinase                                                                           |
| 0,87175824  | 0,18091 | 0,846158597 | 0,01703 | ALKBH2   | alkB, alkylation repair homolog 2 (E. coli)                                                                            |
| 0,97063447  | 0,78098 | 1,128182137 | 0,01262 | ALKBH5   | alkB, alkylation repair homolog 5 (E. coli)                                                                            |
| 0,947370071 | 0,62612 | 0,886381699 | 0,00359 | ALKBH6   | alkB, alkylation repair homolog 6 (E. coli)                                                                            |
| 1,066585781 | 0,63734 | 0,720464874 | 0,00005 | ALKBH8   | alkB, alkylation repair homolog 8 (E. coli)                                                                            |
| 1,086734863 | 0,32145 | 1,149494848 | 0,00387 | ALLC     | allantoicase                                                                                                           |
| 1,186736798 | 0,50886 | 0,837406488 | 0,03006 | ALMS1    | Alstrom syndrome 1                                                                                                     |
| 1,098092814 | 0,4935  | 1,186736798 | 0,005   | ALOX12P2 | arachidonate 12-lipoxygenase pseudogene 2                                                                              |
| 1,331451613 | 0,09341 | 1,436940177 | 0,00462 | ALOX5AP  | arachidonate 5-lipoxygenase-activating protein                                                                         |
| 1,001387256 | 0,98926 | 0,84323111  | 0,02329 | ALPK1    | alpha-kinase 1                                                                                                         |
| 1,189207115 | 0,37069 | 1,45195828  | 0,00202 | ALPK2    | alpha-kinase 2                                                                                                         |
| 0,790041312 | 0,20372 | 0,879649076 | 0,00976 | ALS2     | amyotrophic lateral sclerosis 2 (juvenile)                                                                             |
| 1,203303026 | 0,31202 | 0,837987135 | 0,00208 | ALS2     | amyotrophic lateral sclerosis 2 (juvenile)                                                                             |
| 0,10132569  | 0,8757  | 1,10343374  | 0,02703 | ALS2CR12 | amyotrophic lateral sclerosis 2 (juvenile) chromosome region, candidate 12                                             |
| 0,859160755 | 0,36087 | 0,81056512  | 0,00187 | AMD1     | adenosylmethionine decarboxylase 1                                                                                     |
| 1,136816973 | 0,11613 | 1,101905116 | 0,03914 | AMDHD1   | amidohydrolase domain containing 1                                                                                     |
| 1,091263877 | 0,38252 | 1,181811547 | 0,01048 | AMDHD2   | amidohydrolase domain containing 2                                                                                     |
| 1,121943481 | 0,32002 | 1,242288282 | 0,00203 | AMHR2    | anti-Mullerian hormone receptor, type II                                                                               |
| 0,652929894 | 0,12956 | 0,724973416 | 0,00035 | AMMECR1  | Alport syndrome, mental retardation, midface hypoplasia and elliptocytosis chromosomal region gene 1                   |
| 0,891310496 | 0,50969 | 0,791685866 | 0,00359 | AMMECR1L | AMME chromosomal region gene 1-like                                                                                    |
| 0,879649076 | 0,27986 | 0,899378312 | 0,00863 | AMOTL1   | angiotensin like 1                                                                                                     |
| 0,818469182 | 0,08706 | 0,806641759 | 0,01807 | AMOTL2   | angiotensin like 2                                                                                                     |
| 0,971307496 | 0,77684 | 1,226884977 | 0,00183 | AMT      | aminomethyltransferase                                                                                                 |
| 1,04068494  | 0,52585 | 1,091263877 | 0,03918 | AMZ1     | archaealysin family metalloproteinase 1                                                                                |
| 1,141554707 | 0,40913 | 0,778624691 | 0,0176  | ANAPC10  | anaphase promoting complex subunit 10                                                                                  |
| 0,968618189 | 0,7944  | 0,902500727 | 0,02204 | ANAPC16  | anaphase promoting complex subunit 16                                                                                  |
| 0,775930854 | 0,2205  | 0,775393206 | 0,00204 | ANAPC4   | anaphase promoting complex subunit 4                                                                                   |
| 0,681129017 | 0,08724 | 0,874784765 | 0,01553 | ANAPC4   | anaphase promoting complex subunit 4                                                                                   |
| 0,637280314 | 0,19793 | 0,744322628 | 0,03046 | ANAPC5   | anaphase promoting complex subunit 5                                                                                   |
| 0,751580739 | 0,16112 | 0,775930854 | 0,00322 | ANAPC7   | anaphase promoting complex subunit 7                                                                                   |
| 0,907519155 | 0,61746 | 0,847332435 | 0,03156 | ANGEL2   | angel homolog 2 (Drosophila)                                                                                           |
| 0,968618189 | 0,83849 | 1,318593614 | 0,02496 | ANGPTL2  | angiopoietin-like 2                                                                                                    |

|             |         |             |         |          |                                                                    |
|-------------|---------|-------------|---------|----------|--------------------------------------------------------------------|
| 1,155886707 | 0,15317 | 1,42899414  | 0,00044 | ANGPTL7  | angiopoietin-like 7                                                |
| 1,140763716 | 0,13842 | 1,121943481 | 0,01599 | ANK1     | ankyrin 1, erythrocytic                                            |
| 1,124278924 | 0,2812  | 1,184271612 | 0,00288 | ANK1     | ankyrin 1, erythrocytic                                            |
| 1,128964405 | 0,23197 | 1,22010051  | 0,01102 | ANK1     | ankyrin 1, erythrocytic                                            |
| 0,844986384 | 0,19007 | 0,843815796 | 0,03337 | ANK3     | ankyrin 3, node of Ranvier (ankyrin G)                             |
| 0,986916546 | 0,94494 | 0,824162085 | 0,00232 | ANK3     | ankyrin 3, node of Ranvier (ankyrin G)                             |
| 1,188383105 | 0,06435 | 1,195819797 | 0,01767 | ANKH     | ankylosis, progressive homolog (mouse)                             |
| 1,188383105 | 0,06534 | 1,198309021 | 0,0035  | ANKH     | ankylosis, progressive homolog (mouse)                             |
| 0,768437591 | 0,17693 | 0,732042848 | 0,00072 | ANKH     | ankylosis, progressive homolog (mouse)                             |
| 0,785672517 | 0,05679 | 0,640823962 | 0,00114 | ANKH     | ankylosis, progressive homolog (mouse)                             |
| 0,901250463 | 0,51616 | 0,859160755 | 0,03368 | ANKIB1   | ankyrin repeat and IBR domain containing 1                         |
| 0,833931044 | 0,50468 | 0,775930854 | 0,00092 | ANKIB1   | ankyrin repeat and IBR domain containing 1                         |
| 0,711531731 | 0,06006 | 0,852044095 | 0,02842 | ANKLE2   | ankyrin repeat and LEM domain containing 2                         |
| 0,875998315 | 0,06751 | 1,120389214 | 0,03485 | ANKMY1   | ankyrin repeat and MYND domain containing 1                        |
| 1,130530567 | 0,44907 | 1,25962998  | 0,01108 | ANKRD10  | ankyrin repeat domain 10                                           |
| 0,699308041 | 0,08714 | 0,758909626 | 0,00185 | ANKRD11  | ankyrin repeat domain 11                                           |
| 1,051901779 | 0,62267 | 1,158292806 | 0,03584 | ANKRD11  | ankyrin repeat domain 11                                           |
| 0,729510172 | 0,0862  | 0,79774524  | 0,00322 | ANKRD11  | ankyrin repeat domain 11                                           |
| 0,817335328 | 0,0644  | 0,860949188 | 0,00704 | ANKRD11  | ankyrin repeat domain 11                                           |
| 0,735093668 | 0,09446 | 0,686342216 | 0,00035 | ANKRD12  | ankyrin repeat domain 12                                           |
| 0,828744904 | 0,43768 | 0,716977624 | 0,00001 | ANKRD12  | ankyrin repeat domain 12                                           |
| 0,932386486 | 0,75365 | 0,714992493 | 0,00218 | ANKRD13A | ankyrin repeat domain 13A                                          |
| 0,890692901 | 0,57604 | 0,78024548  | 0,02691 | ANKRD13C | ankyrin repeat domain 13C                                          |
| 0,839731493 | 0,24277 | 0,773782497 | 0,02011 | ANKRD13C | ankyrin repeat domain 13C                                          |
| 1,070288698 | 0,61073 | 0,867538687 | 0,04944 | ANKRD13C | ankyrin repeat domain 13C                                          |
| 0,70027816  | 0,28036 | 0,804966138 | 0,00021 | ANKRD17  | ankyrin repeat domain 17                                           |
| 0,979420298 | 0,81397 | 0,893785162 | 0,02967 | ANKRD31  | ankyrin repeat domain 31                                           |
| 1,155886707 | 0,12866 | 1,272794935 | 0,00042 | ANKRD34A | ankyrin repeat domain 34A                                          |
| 1,186736798 | 0,42491 | 0,793883931 | 0,01375 | ANKRD46  | ankyrin repeat domain 46                                           |
| 0,791685866 | 0,25742 | 0,782954296 | 0,00806 | ANKRD50  | ankyrin repeat domain 50                                           |
| 0,844986384 | 0,57159 | 0,805524291 | 0,0092  | ANKRD50  | ankyrin repeat domain 50                                           |
| 0,971980988 | 0,7515  | 1,136029265 | 0,01926 | ANKRD50  | ankyrin repeat domain 50                                           |
| 1,181811547 | 0,12264 | 1,227735684 | 0,00355 | ANKRD55  | ankyrin repeat domain 55                                           |
| 0,501735874 | 0,07043 | 0,632439771 | 0,00004 | ANKRD57  | ankyrin repeat domain 57                                           |
| 1,062895674 | 0,44839 | 1,147107024 | 0,00193 | ANKRD60  | ankyrin repeat domain 60                                           |
| 0,869947353 | 0,20634 | 0,819036698 | 0,00172 | ANKRD9   | ankyrin repeat domain 9                                            |
| 1,05044544  | 0,62365 | 1,11879158  | 0,04439 | ANKS4B   | ankyrin repeat and sterile alpha motif domain containing 4B        |
| 0,791137301 | 0,07613 | 0,849096246 | 0,0049  | ANKS6    | ankyrin repeat and sterile alpha motif domain containing 6         |
| 0,949342121 | 0,63805 | 1,162314108 | 0,01302 | ANKZF1   | ankyrin repeat and zinc finger domain containing 1                 |
| 1,155886707 | 0,08622 | 1,111879158 | 0,02022 | ANO4     | anoctamin 4                                                        |
| 1,125058485 | 0,20018 | 1,105730653 | 0,02554 | ANO5     | anoctamin 5                                                        |
| 1,048989328 | 0,70221 | 1,155085785 | 0,01844 | ANO6     | anoctamin 6                                                        |
| 1,002081605 | 0,98915 | 1,332374825 | 0,04201 | ANP32A   | acidic (leucine-rich) nuclear phosphoprotein 32 family, member A   |
| 1,157490217 | 0,39378 | 1,270150983 | 0,02798 | ANPEP    | alanyl (membrane) aminopeptidase                                   |
| 1,077733145 | 0,465   | 1,127400412 | 0,01272 | ANTXR1   | anthrax toxin receptor 1                                           |
| 1,106497353 | 0,36807 | 1,151089491 | 0,03712 | ANTXR1   | anthrax toxin receptor 1                                           |
| 1,121166078 | 0,45704 | 1,246601194 | 0,01418 | ANTXR2   | anthrax toxin receptor 2                                           |
| 1,055553718 | 0,84969 | 1,232852325 | 0,00447 | ANXA11   | annexin A11                                                        |
| 1,258757174 | 0,0797  | 1,205807828 | 0,00072 | ANXA11   | annexin A11                                                        |
| 1,109569472 | 0,31903 | 1,127400412 | 0,01145 | ANXA13   | annexin A13                                                        |
| 0,693515485 | 0,05403 | 0,762072415 | 0,00061 | ANXA4    | annexin A4                                                         |
| 0,733058379 | 0,08265 | 0,687770909 | 0       | ANXA7    | annexin A7                                                         |
| 1,124278924 | 0,26565 | 1,22603486  | 0,00552 | AOAH     | acyloxyacyl hydrolase (neutrophil)                                 |
| 0,759435845 | 0,18958 | 0,61301743  | 0,00069 | AP1AR    | adaptor-related protein complex 1 associated regulatory protein    |
| 0,795536484 | 0,1394  | 0,906890329 | 0,01978 | AP1G1    | adaptor-related protein complex 1, gamma 1 subunit                 |
| 1,248330549 | 0,38083 | 1,347233577 | 0,00503 | AP1M1    | adaptor-related protein complex 1, mu 1 subunit                    |
| 0,920187651 | 0,70105 | 0,855002178 | 0,01446 | AP1S2    | adaptor-related protein complex 1, sigma 2 subunit                 |
| 0,946713631 | 0,35686 | 0,879649076 | 0,01146 | AP1S3    | adaptor-related protein complex 1, sigma 3 subunit                 |
| 0,741747467 | 0,17784 | 0,70759708  | 0,03339 | AP1S3    | adaptor-related protein complex 1, sigma 3 subunit                 |
| 0,856188285 | 0,14255 | 0,803850991 | 0,04637 | AP1S3    | adaptor-related protein complex 1, sigma 3 subunit                 |
| 0,782954296 | 0,15565 | 0,859756486 | 0,03724 | AP2A1    | adaptor-related protein complex 2, alpha 1 subunit                 |
| 0,992404375 | 0,97117 | 1,220946513 | 0,0109  | AP2A2    | adaptor-related protein complex 2, alpha 2 subunit                 |
| 0,974679631 | 0,91186 | 1,194991205 | 0,01619 | AP2A2    | adaptor-related protein complex 2, alpha 2 subunit                 |
| 1,149494848 | 0,27558 | 1,304050735 | 0,00003 | AP2B1    | adaptor-related protein complex 2, beta 1 subunit                  |
| 0,921464186 | 0,59743 | 1,330529041 | 0,00989 | AP2B1    | adaptor-related protein complex 2, beta 1 subunit                  |
| 0,802737389 | 0,05423 | 0,857376037 | 0,04408 | AP3B1    | adaptor-related protein complex 3, beta 1 subunit                  |
| 0,785128119 | 0,24508 | 0,872967591 | 0,04295 | AP3D1    | adaptor-related protein complex 3, delta 1 subunit                 |
| 1,153485605 | 0,10704 | 1,139183377 | 0,00647 | AP3S2    | adaptor-related protein complex 3, sigma 2 subunit                 |
| 1,135242102 | 0,16065 | 1,195819797 | 0,01661 | AP3S2    | adaptor-related protein complex 3, sigma 2 subunit                 |
| 0,955945318 | 0,67284 | 1,229438867 | 0,00249 | AP4B1    | adaptor-related protein complex 4, beta 1 subunit                  |
| 0,688247801 | 0,10611 | 0,738669032 | 0,00028 | AP4E1    | adaptor-related protein complex 4, epsilon 1 subunit               |
| 1,190856849 | 0,05286 | 1,154285418 | 0,0067  | AP4E1    | adaptor-related protein complex 4, epsilon 1 subunit               |
| 0,86934456  | 0,13216 | 0,862741345 | 0,00454 | AP4S1    | adaptor-related protein complex 4, sigma 1 subunit                 |
| 0,942784536 | 0,40661 | 1,102669163 | 0,01535 | AP4S1    | adaptor-related protein complex 4, sigma 1 subunit                 |
| 1,114966219 | 0,19271 | 1,150291893 | 0,00881 | APBA1    | amyloid beta (A4) precursor protein-binding, family A, member 1    |
| 1,231144413 | 0,13354 | 1,194991205 | 0,0253  | APBA2    | amyloid beta (A4) precursor protein-binding, family A, member 2    |
| 1,114966219 | 0,26577 | 1,217566019 | 0,00613 | APBB2    | amyloid beta (A4) precursor protein-binding, family B, member 2    |
| 0,965267025 | 0,66728 | 1,172834949 | 0,04181 | APBB2    | amyloid beta (A4) precursor protein-binding, family B, member 2    |
| 1,220946513 | 0,08061 | 1,350974085 | 0,00055 | APBB3    | amyloid beta (A4) precursor protein-binding, family B, member 3    |
| 0,69640574  | 0,13574 | 0,662044455 | 0,00214 | APC      | adenomatous polyposis coli                                         |
| 1,020304659 | 0,90465 | 1,125838586 | 0,04391 | APEH     | N-acylaminoacyl-peptide hydrolase                                  |
| 0,910669834 | 0,51541 | 0,884540435 | 0,04759 | APEX2    | APEX nuclease (apurinic/apyrimidinic endonuclease) 2               |
| 1,00765376  | 0,93069 | 0,907519155 | 0,0299  | APH1A    | anterior pharynx defective 1 homolog A (C. elegans)                |
| 0,790041312 | 0,1453  | 0,832198735 | 0,00016 | API5     | apoptosis inhibitor 5                                              |
| 1,018891197 | 0,8976  | 0,805524291 | 0,02186 | APIP     | APAF1 interacting protein                                          |
| 0,811689581 | 0,38674 | 0,682073917 | 0,00047 | APLF     | apratxin and PNKP like factor                                      |
| 1,030968319 | 0,77908 | 1,173648178 | 0,01474 | APLP2    | amyloid beta (A4) precursor-like protein 2                         |
| 0,936921447 | 0,74797 | 1,200803427 | 0,02217 | APLP2    | amyloid beta (A4) precursor-like protein 2                         |
| 0,940826108 | 0,81514 | 1,085981856 | 0,04609 | APOA1BP  | apolipoprotein A-I binding protein                                 |
| 1,093535457 | 0,21918 | 1,192508872 | 0,01852 | APOBEC2  | apolipoprotein B mRNA editing enzyme, catalytic polypeptide-like 2 |
| 1,059952783 | 0,58489 | 1,210833084 | 0,0034  | APOBR    | apolipoprotein B receptor                                          |
| 1,301341855 | 0,15745 | 1,316766922 | 0,00118 | APOC1    | apolipoprotein C-I                                                 |
| 0,964598185 | 0,72015 | 1,198309021 | 0,00179 | APOC2    | apolipoprotein C-II                                                |
| 1,45296505  | 0,12237 | 1,629015126 | 0,00006 | APOE     | apolipoprotein E                                                   |
| 1,25092908  | 0,07307 | 1,422077411 | 0,00046 | APOE     | apolipoprotein E                                                   |
| 1,095811766 | 0,32493 | 1,136029265 | 0,02478 | APOH     | apolipoprotein H (beta-2-glycoprotein I)                           |
| 1,264879542 | 0,12278 | 1,364147835 | 0,00135 | APOL1    | apolipoprotein L, 1                                                |
| 0,86154616  | 0,18361 | 1,175276328 | 0,01075 | APOL5    | apolipoprotein L, 5                                                |
| 1,188383105 | 0,09605 | 1,162314108 | 0,0274  | APOL6    | apolipoprotein L, 6                                                |
| 0,908778116 | 0,34619 | 1,135242102 | 0,02038 | APOM     | apolipoprotein M                                                   |
| 0,811689581 | 0,34457 | 0,711038705 | 0,00085 | APOOL    | apolipoprotein O-like                                              |
| 0,773246337 | 0,23931 | 0,676424116 | 0,02079 | APOOL    | apolipoprotein O-like                                              |
| 0,796640096 | 0,1063  | 0,866937564 | 0,00543 | APOPT1   | apoptogenic 1                                                      |
| 1,035982764 | 0,82381 | 1,174461971 | 0,00249 | APP      | amyloid beta (A4) precursor protein                                |

|             |         |             |         |           |                                                                                         |
|-------------|---------|-------------|---------|-----------|-----------------------------------------------------------------------------------------|
| 0,89564567  | 0,67978 | 0,876605721 | 0,04885 | APPBP2    | amyloid beta precursor protein (cytoplasmic tail) binding protein 2                     |
| 0,532554102 | 0,0581  | 0,570777354 | 0,00116 | APP1      | adaptor protein, phosphotyrosine interaction, PH domain and leucine zipper containing 1 |
| 0,986916546 | 0,96944 | 1,294145654 | 0,02858 | AQP1      | aquaporin 1 (Colton blood group)                                                        |
| 1,204972315 | 0,53427 | 1,498999602 | 0,00009 | AQP1      | aquaporin 1 (Colton blood group)                                                        |
| 1,035982764 | 0,66056 | 1,172022284 | 0,00578 | AQP2      | aquaporin 2 (collecting duct)                                                           |
| 0,745872013 | 0,52983 | 0,820172911 | 0,03792 | AQP3      | aquaporin 3 (Gill blood group)                                                          |
| 0,847919965 | 0,1613  | 0,799960128 | 0,00019 | AQR       | aquarius homolog (mouse)                                                                |
| 0,934327347 | 0,67077 | 0,713507253 | 0,00054 | AQR       | aquarius homolog (mouse)                                                                |
| 1,026689546 | 0,85213 | 1,151089491 | 0,00962 | AR        | androgen receptor                                                                       |
| 1,070288698 | 0,75265 | 1,269270886 | 0,00322 | ARAF      | v-raf murine sarcoma 3611 viral oncogene homolog                                        |
| 1,060687741 | 0,72804 | 0,774855931 | 0,00847 | ARAP2     | ArfGAP with RhoGAP domain, ankyrin repeat and PH domain 2                               |
| 1,191682575 | 0,23738 | 1,260503392 | 0,01303 | ARAP3     | ArfGAP with RhoGAP domain, ankyrin repeat and PH domain 3                               |
| 1,001387256 | 0,99212 | 1,257013375 | 0,00534 | ARF3      | ADP-ribosylation factor 3                                                               |
| 0,918912883 | 0,49883 | 0,84264683  | 0,00804 | ARF6      | ADP-ribosylation factor 6                                                               |
| 1,07549439  | 0,58974 | 1,268391399 | 0,03138 | ARFGAP1   | ADP-ribosylation factor GTPase activating protein 1                                     |
| 0,972654947 | 0,85459 | 0,802737389 | 0,00803 | ARFGEF2   | ADP-ribosylation factor guanine nucleotide-exchange factor 2 (brefeldin A-inhibited)    |
| 1,024556823 | 0,93444 | 0,882091365 | 0,03425 | ARFGEF2   | ADP-ribosylation factor guanine nucleotide-exchange factor 2 (brefeldin A-inhibited)    |
| 0,802181166 | 0,16376 | 0,787307977 | 0,03257 | ARG2      | arginase, type II                                                                       |
| 0,72597914  | 0,07408 | 0,713507253 | 0,00485 | ARGLU1    | arginine and glutamate rich 1                                                           |
| 0,963261894 | 0,68369 | 0,829894586 | 0,00103 | ARHGAP11A | Rho GTPase activating protein 11A                                                       |
| 0,756808396 | 0,18455 | 0,78024548  | 0,02377 | ARHGAP12  | Rho GTPase activating protein 12                                                        |
| 1,065108203 | 0,41608 | 1,155886707 | 0,03531 | ARHGAP20  | Rho GTPase activating protein 20                                                        |
| 0,716977624 | 0,17175 | 0,744838732 | 0,0198  | ARHGAP21  | Rho GTPase activating protein 21                                                        |
| 1,246601194 | 0,06037 | 1,190856849 | 0,00032 | ARHGAP23  | Rho GTPase activating protein 23                                                        |
| 0,814507563 | 0,1115  | 0,807760778 | 0,00771 | ARHGAP24  | Rho GTPase activating protein 24                                                        |
| 0,91319825  | 0,22072 | 1,125838586 | 0,04372 | ARHGAP26  | Rho GTPase activating protein 26                                                        |
| 1,152686347 | 0,12362 | 1,145517898 | 0,02935 | ARHGAP28  | Rho GTPase activating protein 28                                                        |
| 1,185914499 | 0,40432 | 1,172834949 | 0,04135 | ARHGAP30  | Rho GTPase activating protein 30                                                        |
| 1,112650121 | 0,52543 | 1,167967395 | 0,02567 | ARHGAP31  | Rho GTPase activating protein 31                                                        |
| 0,630688704 | 0,0617  | 0,734075318 | 0,00751 | ARHGAP32  | Rho GTPase activating protein 32                                                        |
| 1,111879158 | 0,1714  | 1,261377409 | 0,00539 | ARHGAP33  | Rho GTPase activating protein 33                                                        |
| 0,762072415 | 0,17534 | 0,747424624 | 0,00006 | ARHGAP35  | Rho GTPase activating protein 35                                                        |
| 0,895025071 | 0,61857 | 0,758383773 | 0,02255 | ARHGAP35  | Rho GTPase activating protein 35                                                        |
| 1,050444544 | 0,42039 | 1,083725967 | 0,01774 | ARHGAP42  | Rho GTPase activating protein 42                                                        |
| 1,116512962 | 0,18267 | 1,158292806 | 0,00176 | ARHGAP44  | Rho GTPase activating protein 44                                                        |
| 0,720964436 | 0,14171 | 0,665264521 | 0,0144  | ARHGAP5   | Rho GTPase activating protein 5                                                         |
| 0,777546036 | 0,31874 | 0,747424624 | 0,01558 | ARHGAP5   | Rho GTPase activating protein 5                                                         |
| 0,890075733 | 0,69669 | 0,806082831 | 0,01469 | ARHGAP5   | Rho GTPase activating protein 5                                                         |
| 1,708819482 | 0,06196 | 1,250062303 | 0,02754 | ARHGAP6   | Rho GTPase activating protein 6                                                         |
| 0,990342872 | 0,92361 | 1,129747215 | 0,02164 | ARHGAP6   | Rho GTPase activating protein 6                                                         |
| 1,214194884 | 0,07648 | 1,185092771 | 0,00206 | ARHGAP8   | Rho GTPase activating protein 8                                                         |
| 1,182631    | 0,09266 | 1,194163187 | 0,00132 | ARHGDI1B  | Rho GDP dissociation inhibitor (GDI) beta                                               |
| 1,465100875 | 0,2532  | 1,527317498 | 0,00058 | ARHGDI1B  | Rho GDP dissociation inhibitor (GDI) beta                                               |
| 0,71548826  | 0,06127 | 0,794985251 | 0,01389 | ARHGEF10  | Rho guanine nucleotide exchange factor (GEF) 10                                         |
| 0,90312651  | 0,4565  | 0,713507253 | 0,00422 | ARHGEF10L | Rho guanine nucleotide exchange factor (GEF) 10-like                                    |
| 1,198309021 | 0,0688  | 1,216722359 | 0,01012 | ARHGEF11  | Rho guanine nucleotide exchange factor (GEF) 11                                         |
| 0,827596816 | 0,38747 | 0,730016005 | 0,00019 | ARHGEF12  | Rho guanine nucleotide exchange factor (GEF) 12                                         |
| 0,940826108 | 0,50066 | 0,848507902 | 0,0021  | ARHGEF12  | Rho guanine nucleotide exchange factor (GEF) 12                                         |
| 1,171210181 | 0,2668  | 1,361314116 | 0,00277 | ARHGEF15  | Rho guanine nucleotide exchange factor (GEF) 15                                         |
| 1,072516617 | 0,5092  | 1,242288282 | 0,00548 | ARHGEF16  | Rho guanine nucleotide exchange factor (GEF) 16                                         |
| 1,247465572 | 0,09351 | 1,299539062 | 0,00069 | ARHGEF17  | Rho guanine nucleotide exchange factor (GEF) 17                                         |
| 1,208317843 | 0,13287 | 1,121166078 | 0,04507 | ARHGEF25  | Rho guanine nucleotide exchange factor (GEF) 25                                         |
| 0,872362706 | 0,06099 | 0,793883931 | 0,00062 | ARHGEF26  | Rho guanine nucleotide exchange factor (GEF) 26                                         |
| 0,656105627 | 0,0553  | 0,549046407 | 0,00002 | ARHGEF26  | Rho guanine nucleotide exchange factor (GEF) 26                                         |
| 0,901875378 | 0,29725 | 0,777007269 | 0,01706 | ARHGEF26  | Rho guanine nucleotide exchange factor (GEF) 26                                         |
| 1,167158102 | 0,23452 | 1,176906737 | 0,00388 | ARHGEF38  | Rho guanine nucleotide exchange factor (GEF) 38                                         |
| 0,956608158 | 0,6568  | 0,860352631 | 0,03574 | ARHGEF40  | Rho guanine nucleotide exchange factor (GEF) 40                                         |
| 0,984866443 | 0,90202 | 1,161508732 | 0,03066 | ARID1B    | AT rich interactive domain 1B (SWI1-like)                                               |
| 0,879649076 | 0,63342 | 0,778085177 | 0,01461 | ARID1B    | AT rich interactive domain 1B (SWI1-like)                                               |
| 1,019597683 | 0,85653 | 1,260503392 | 0,00323 | ARID1B    | AT rich interactive domain 1B (SWI1-like)                                               |
| 0,746389192 | 0,21997 | 0,726482525 | 0,00138 | ARID1B    | AT rich interactive domain 1B (SWI1-like)                                               |
| 0,961927455 | 0,85779 | 0,812815602 | 0,00728 | ARID2     | AT rich interactive domain 2 (ARID, RFX-like)                                           |
| 0,835087919 | 0,44224 | 0,885153765 | 0,03503 | ARID2     | AT rich interactive domain 2 (ARID, RFX-like)                                           |
| 0,866937564 | 0,38211 | 0,865736566 | 0,02377 | ARIH1     | ariadne homolog, ubiquitin-conjugating enzyme E2 binding protein, 1 (Drosophila)        |
| 0,898132373 | 0,53563 | 0,738669032 | 0,00779 | ARL1      | ADP-ribosylation factor-like 1                                                          |
| 0,685391402 | 0,10459 | 0,833931044 | 0,01067 | ARL10     | ADP-ribosylation factor-like 10                                                         |
| 0,914465089 | 0,64957 | 0,757333158 | 0,00139 | ARL13B    | ADP-ribosylation factor-like 13B                                                        |
| 0,830470024 | 0,0565  | 0,880259014 | 0,01991 | ARL17A    | ADP-ribosylation factor-like 17A                                                        |
| 0,971980988 | 0,81042 | 1,158292806 | 0,0289  | ARL17A    | ADP-ribosylation factor-like 17A                                                        |
| 0,748980467 | 0,33431 | 0,826450318 | 0,03435 | ARL4C     | ADP-ribosylation factor-like 4C                                                         |
| 0,787853886 | 0,39483 | 0,778085177 | 0,00237 | ARL5A     | ADP-ribosylation factor-like 5A                                                         |
| 0,730016005 | 0,25699 | 0,637722196 | 0,00007 | ARL5A     | ADP-ribosylation factor-like 5A                                                         |
| 0,898132373 | 0,64713 | 0,737134609 | 0,01553 | ARL5B     | ADP-ribosylation factor-like 5B                                                         |
| 0,942784536 | 0,61056 | 0,848507902 | 0,00552 | ARL6      | ADP-ribosylation factor-like 6                                                          |
| 0,902500727 | 0,57616 | 0,718968266 | 0,00094 | ARL6IP6   | ADP-ribosylation-like factor 6 interacting protein 6                                    |
| 0,920826597 | 0,75239 | 0,726986259 | 0,00025 | ARL6IP6   | ADP-ribosylation-like factor 6 interacting protein 6                                    |
| 0,949342121 | 0,82913 | 0,805524291 | 0,01407 | ARMC1     | armadillo repeat containing 1                                                           |
| 0,771105413 | 0,26442 | 0,751580739 | 0,00398 | ARMC8     | armadillo repeat containing 8                                                           |
| 1,276328769 | 0,0941  | 0,855002178 | 0,04533 | ARMC8     | armadillo repeat containing 8                                                           |
| 0,791137301 | 0,28716 | 0,787307977 | 0,02781 | ARMCX1    | armadillo repeat containing, X-linked 1                                                 |
| 1,068065408 | 0,50501 | 1,236275261 | 0,00071 | ARMCX4    | armadillo repeat containing, X-linked 4                                                 |
| 0,810003474 | 0,38661 | 0,728499557 | 0,01104 | ARMCX4    | armadillo repeat containing, X-linked 4                                                 |
| 1,01395948  | 0,94987 | 0,801069878 | 0,00261 | ARMCX5    | armadillo repeat containing, X-linked 5                                                 |
| 1,158292806 | 0,2655  | 1,159899655 | 0,04839 | ARMCX6    | armadillo repeat containing, X-linked 6                                                 |
| 1,214194884 | 0,30665 | 1,364147835 | 0,00205 | ARPC1B    | actin related protein 2/3 complex, subunit 1B, 41kDa                                    |
| 0,7031966   | 0,48383 | 0,888226796 | 0,03653 | ARPC2     | actin related protein 2/3 complex, subunit 2, 34kDa                                     |
| 0,827596816 | 0,06463 | 0,857376037 | 0,00981 | ARPC2     | actin related protein 2/3 complex, subunit 2, 34kDa                                     |
| 0,554400322 | 0,08354 | 0,889458994 | 0,02587 | ARPC3     | actin related protein 2/3 complex, subunit 3, 21kDa                                     |
| 1,304050735 | 0,05046 | 1,171210181 | 0,01001 | ARPC5     | actin related protein 2/3 complex, subunit 5, 16kDa                                     |
| 0,753145233 | 0,06065 | 0,91319825  | 0,01753 | ARPC5L    | actin related protein 2/3 complex, subunit 5-like                                       |
| 0,890692901 | 0,58779 | 0,838568184 | 0,02026 | ARPC5L    | actin related protein 2/3 complex, subunit 5-like                                       |
| 0,87175824  | 0,30684 | 0,753145233 | 0,00002 | ARPC5L    | actin related protein 2/3 complex, subunit 5-like                                       |
| 0,816203046 | 0,2849  | 0,870550563 | 0,01544 | ARPP19    | cAMP-regulated phosphoprotein, 19kDa                                                    |
| 1,092020546 | 0,55934 | 1,256142381 | 0,00145 | ARRB1     | arrestin, beta 1                                                                        |
| 1,123499903 | 0,2623  | 1,123499903 | 0,02028 | ARRB1     | arrestin, beta 1                                                                        |
| 1,102669163 | 0,33231 | 1,180174343 | 0,03026 | ARRB1     | arrestin, beta 1                                                                        |
| 1,086734863 | 0,47619 | 1,117287138 | 0,02671 | ARRB1     | arrestin, beta 1                                                                        |
| 0,950000383 | 0,53829 | 0,85027416  | 0,01395 | ARRDC1    | arrestin domain containing 1                                                            |
| 1,142346247 | 0,24394 | 1,163926534 | 0,01153 | ARRDC2    | arrestin domain containing 2                                                            |
| 0,779704843 | 0,29938 | 0,731028724 | 0,01146 | ARRDC3    | arrestin domain containing 3                                                            |
| 0,963261894 | 0,72873 | 1,164733586 | 0,00845 | ARSA      | arylsulfatase A                                                                         |
| 0,902500727 | 0,45091 | 1,273677475 | 0,01821 | ARSD      | arylsulfatase D                                                                         |
| 0,962594443 | 0,87205 | 1,260503392 | 0,00449 | ARSI      | arylsulfatase family, member I                                                          |
| 1,027401439 | 0,7422  | 1,138394029 | 0,03479 | ART1      | ADP-ribosyltransferase 1                                                                |

|             |         |             |         |           |                                                                                          |
|-------------|---------|-------------|---------|-----------|------------------------------------------------------------------------------------------|
| 1,020304659 | 0,81029 | 1,271913007 | 0,00118 | ART1      | ADP-ribosyltransferase 1                                                                 |
| 1,22010051  | 0,06431 | 1,156688184 | 0,02197 | ART5      | ADP-ribosyltransferase 5                                                                 |
| 1,054822317 | 0,70659 | 1,147902414 | 0,02926 | ARTN      | artemin                                                                                  |
| 1,043188594 | 0,6944  | 1,157490217 | 0,04454 | ARVCF     | armadillo repeat gene deleted in velocardiofacial syndrome                               |
| 1,136816973 | 0,16001 | 1,147902414 | 0,02838 | ARVCF     | armadillo repeat gene deleted in velocardiofacial syndrome                               |
| 1,018891197 | 0,86573 | 1,199971382 | 0,00729 | ARVCF     | armadillo repeat gene deleted in velocardiofacial syndrome                               |
| 0,84323111  | 0,29797 | 0,862143545 | 0,03298 | ASAH1     | N-acylsphingosine amidohydrolase (acid ceramidase) 1                                     |
| 0,870550563 | 0,13383 | 0,833353207 | 0,00307 | ASAH1     | N-acylsphingosine amidohydrolase (acid ceramidase) 1                                     |
| 0,740719899 | 0,22999 | 0,807760778 | 0,00628 | ASAP2     | ArfGAP with SH3 domain, ankyrin repeat and PH domain 2                                   |
| 1,062159186 | 0,60103 | 1,107264584 | 0,03108 | ASB1      | ankyrin repeat and SOCS box containing 1                                                 |
| 1,067325338 | 0,54355 | 1,191682575 | 0,00375 | ASB1      | ankyrin repeat and SOCS box containing 1                                                 |
| 1,256142381 | 0,05171 | 1,335148303 | 0,00209 | ASB10     | ankyrin repeat and SOCS box containing 10                                                |
| 1,298638603 | 0,06323 | 1,326845141 | 0,00559 | ASB12     | ankyrin repeat and SOCS box containing 12                                                |
| 1,071773463 | 0,44914 | 1,122721422 | 0,04192 | ASB14     | ankyrin repeat and SOCS box containing 14                                                |
| 1,125058485 | 0,2329  | 1,097331938 | 0,03521 | ASB14     | ankyrin repeat and SOCS box containing 14                                                |
| 0,997922719 | 0,98392 | 1,242288282 | 0,00081 | ASB7      | ankyrin repeat and SOCS box containing 7                                                 |
| 1,016070143 | 0,94044 | 0,835087919 | 0,02288 | ASB7      | ankyrin repeat and SOCS box containing 7                                                 |
| 1,076986376 | 0,35214 | 1,104198847 | 0,02718 | ASB9      | ankyrin repeat and SOCS box containing 9                                                 |
| 0,709561678 | 0,06816 | 0,74277646  | 0,00668 | ASCC3     | activating signal cointegrator 1 complex subunit 3                                       |
| 1,07997656  | 0,60347 | 1,117287138 | 0,0226  | ASCL1     | achaete-scute complex homolog 1 (Drosophila)                                             |
| 1,058484395 | 0,5227  | 1,179356592 | 0,02478 | ASCL3     | achaete-scute complex homolog 3 (Drosophila)                                             |
| 0,670821112 | 0,08945 | 0,659753955 | 0,00008 | ASF1A     | ASF1 anti-silencing function 1 homolog A (S. cerevisiae)                                 |
| 0,748980467 | 0,08895 | 0,76684133  | 0,02976 | ASF1A     | ASF1 anti-silencing function 1 homolog A (S. cerevisiae)                                 |
| 0,825305409 | 0,66545 | 0,764718139 | 0,00059 | ASH1L     | ash1 (absent, small, or homeotic)-like (Drosophila)                                      |
| 0,790041312 | 0,23357 | 0,866937564 | 0,02797 | ASH1L     | ash1 (absent, small, or homeotic)-like (Drosophila)                                      |
| 1,198309021 | 0,26955 | 1,327765158 | 0,00019 | ASMTL-AS1 | ASMTL antisense RNA 1 (non-protein coding)                                               |
| 1,143138335 | 0,17327 | 1,169587664 | 0,00837 | ASMTL-AS1 | ASMTL antisense RNA 1 (non-protein coding)                                               |
| 1,020304659 | 0,89711 | 1,142346247 | 0,02806 | ASMTL-AS1 | ASMTL antisense RNA 1 (non-protein coding)                                               |
| 0,743291492 | 0,07994 | 0,84323111  | 0,00078 | ASNSD1    | asparagine synthetase domain containing 1                                                |
| 1,057018041 | 0,44942 | 1,21167266  | 0,01448 | ASPA      | aspartoacylase                                                                           |
| 1,008352455 | 0,93222 | 1,113421618 | 0,03536 | ASPG      | asparaginase homolog (S. cerevisiae)                                                     |
| 1,031683179 | 0,70587 | 1,277213759 | 0,0003  | ASPG      | asparaginase homolog (S. cerevisiae)                                                     |
| 0,91319825  | 0,66938 | 0,78024548  | 0,0024  | ASPH      | aspartate beta-hydroxylase                                                               |
| 0,942784536 | 0,82095 | 0,739181216 | 0,0241  | ASPH      | aspartate beta-hydroxylase                                                               |
| 1,157490217 | 0,3438  | 1,298638603 | 0,00005 | ASPHD1    | aspartate beta-hydroxylase domain containing 1                                           |
| 0,765778999 | 0,07377 | 0,814507563 | 0,00188 | ASPM      | asp (abnormal spindle) homolog, microcephaly associated (Drosophila)                     |
| 0,872967591 | 0,34494 | 0,872362706 | 0,04729 | ASPM      | asp (abnormal spindle) homolog, microcephaly associated (Drosophila)                     |
| 1,118837101 | 0,71592 | 1,545421099 | 0       | ASS1      | argininosuccinate synthase 1                                                             |
| 0,858565436 | 0,13885 | 1,105730653 | 0,03405 | ASXL1     | additional sex combs like 1 (Drosophila)                                                 |
| 1,155085785 | 0,23219 | 1,351910833 | 0,00831 | ASXL2     | additional sex combs like 2 (Drosophila)                                                 |
| 1,171210181 | 0,53757 | 0,903752727 | 0,0473  | ASXL2     | additional sex combs like 2 (Drosophila)                                                 |
| 0,87417862  | 0,55205 | 0,737645729 | 0,0005  | ASXL2     | additional sex combs like 2 (Drosophila)                                                 |
| 0,995849753 | 0,96965 | 1,155886707 | 0,00326 | ASXL2     | additional sex combs like 2 (Drosophila)                                                 |
| 1,056285625 | 0,76289 | 0,77271055  | 0,02424 | ASXL2     | additional sex combs like 2 (Drosophila)                                                 |
| 0,818469182 | 0,28617 | 0,780786493 | 0,00117 | ATAD1     | ATPase family, AAA domain containing 1                                                   |
| 0,865736566 | 0,47981 | 0,778624691 | 0,00768 | ATAD2     | ATPase family, AAA domain containing 2                                                   |
| 0,995849753 | 0,98432 | 0,740719899 | 0,00023 | ATAD2     | ATPase family, AAA domain containing 2                                                   |
| 0,794985251 | 0,23406 | 0,806641759 | 0,02212 | ATAD2B    | ATPase family, AAA domain containing 2B                                                  |
| 0,984866443 | 0,90725 | 1,282536603 | 0,00589 | ATAD3B    | ATPase family, AAA domain containing 3B                                                  |
| 1,109569472 | 0,3968  | 1,198309021 | 0,0092  | ATCAY     | ataxia, cerebellar, Cayman type                                                          |
| 0,890075733 | 0,61914 | 0,771105413 | 0,01649 | ATE1      | arginyltransferase 1                                                                     |
| 0,944747041 | 0,80586 | 0,735093668 | 0,00314 | ATF1      | activating transcription factor 1                                                        |
| 0,965936329 | 0,88819 | 0,792234811 | 0,00949 | ATF1      | activating transcription factor 1                                                        |
| 1,174461971 | 0,16725 | 1,860899315 | 0,00526 | ATF3      | activating transcription factor 3                                                        |
| 1,50733491  | 0,05404 | 1,361314116 | 0,00681 | ATF5      | activating transcription factor 5                                                        |
| 1,110338834 | 0,25508 | 1,21167266  | 0,00045 | ATF6      | activating transcription factor 6                                                        |
| 0,960594864 | 0,71587 | 1,155886707 | 0,0251  | ATF6B     | activating transcription factor 6 beta                                                   |
| 0,923382311 | 0,5862  | 0,76418826  | 0,00105 | ATF7      | activating transcription factor 7                                                        |
| 0,961927455 | 0,71856 | 0,863339559 | 0,00472 | ATF7IP    | activating transcription factor 7 interacting protein                                    |
| 0,918912883 | 0,51263 | 0,827596816 | 0,00983 | ATG10     | ATG10 autophagy related 10 homolog (S. cerevisiae)                                       |
| 0,991716731 | 0,95842 | 1,138394029 | 0,03918 | ATG13     | ATG13 autophagy related 13 homolog (S. cerevisiae)                                       |
| 1,014662547 | 0,93565 | 1,137605228 | 0,0171  | ATG13     | ATG13 autophagy related 13 homolog (S. cerevisiae)                                       |
| 0,783497187 | 0,09952 | 0,821880187 | 0,0035  | ATG14     | ATG14 autophagy related 14 homolog (S. cerevisiae)                                       |
| 0,736623843 | 0,10534 | 0,714992493 | 0,00002 | ATG16L1   | ATG16 autophagy related 16-like 1 (S. cerevisiae)                                        |
| 0,873572896 | 0,15937 | 0,883315051 | 0,01524 | ATG16L1   | ATG16 autophagy related 16-like 1 (S. cerevisiae)                                        |
| 0,73052189  | 0,05179 | 0,798298386 | 0,00028 | ATG2B     | ATG2 autophagy related 2 homolog B (S. cerevisiae)                                       |
| 1,009751298 | 0,95085 | 0,837987135 | 0,00263 | ATG3      | ATG3 autophagy related 3 homolog (S. cerevisiae)                                         |
| 0,994470169 | 0,97648 | 1,226884977 | 0,00052 | ATG7      | ATG7 autophagy related 7 homolog (S. cerevisiae)                                         |
| 0,685866644 | 0,0852  | 0,782954296 | 0,00607 | ATL1      | atlastin GTPase 1                                                                        |
| 0,893785162 | 0,3732  | 0,796640096 | 0,00276 | ATL3      | atlastin GTPase 3                                                                        |
| 0,76950361  | 0,06604 | 0,859756486 | 0,00736 | ATL3      | atlastin GTPase 3                                                                        |
| 1,164733586 | 0,15341 | 1,318593614 | 0,0027  | ATM       | ataxia telangiectasia mutated                                                            |
| 1,060687741 | 0,77504 | 1,237132479 | 0,01692 | ATM       | ataxia telangiectasia mutated                                                            |
| 1,337000495 | 0,06493 | 1,274560627 | 0,00066 | ATMIN     | ATM interactor                                                                           |
| 1,031683179 | 0,80135 | 1,207480591 | 0,02804 | ATN1      | atrophin 1                                                                               |
| 1,068805991 | 0,44818 | 1,217566019 | 0,00068 | ATOH1     | atonal homolog 1 (Drosophila)                                                            |
| 1,159095952 | 0,12826 | 1,20163605  | 0,00307 | ATOH8     | atonal homolog 8 (Drosophila)                                                            |
| 1,002776436 | 0,98073 | 1,294145654 | 0,00611 | ATP10A    | ATPase, class V, type 10A                                                                |
| 0,86934456  | 0,14617 | 0,863938187 | 0,02689 | ATP11A    | ATPase, class VI, type 11A                                                               |
| 0,758383773 | 0,28131 | 0,70514898  | 0,00044 | ATP11A    | ATPase, class VI, type 11A                                                               |
| 0,953298545 | 0,58227 | 1,094293701 | 0,03877 | ATP11A    | ATPase, class VI, type 11A                                                               |
| 0,674083866 | 0,2081  | 0,690637224 | 0,00183 | ATP11B    | ATPase, class VI, type 11B                                                               |
| 0,627635996 | 0,10773 | 0,670356296 | 0,00039 | ATP11B    | ATPase, class VI, type 11B                                                               |
| 1,035982764 | 0,7462  | 1,140763716 | 0,04794 | ATP13A5   | ATPase type 13A5                                                                         |
| 0,917004043 | 0,29816 | 0,877213549 | 0,02593 | ATP13A5   | ATPase type 13A5                                                                         |
| 0,871154192 | 0,6019  | 1,274560627 | 0,00034 | ATP1A1    | ATPase, Na+/K+ transporting, alpha 1 polypeptide                                         |
| 1,046810282 | 0,57455 | 1,207480591 | 0,00229 | ATP1A1OS  | ATP1A1 opposite strand                                                                   |
| 1,078480432 | 0,80273 | 0,78132788  | 0,00667 | ATP1B1    | ATPase, Na+/K+ transporting, beta 1 polypeptide                                          |
| 1,203303026 | 0,07884 | 1,140763716 | 0,03609 | ATP1B2    | ATPase, Na+/K+ transporting, beta 2 polypeptide                                          |
| 0,73153561  | 0,27447 | 0,737645729 | 0,00148 | ATP2B1    | ATPase, Ca++ transporting, plasma membrane 1                                             |
| 0,884504035 | 0,65459 | 0,79774524  | 0,01211 | ATP2B1    | ATPase, Ca++ transporting, plasma membrane 1                                             |
| 0,798298386 | 0,37204 | 0,735603373 | 0,00109 | ATP2B1    | ATPase, Ca++ transporting, plasma membrane 1                                             |
| 1,151887642 | 0,1896  | 1,146312186 | 0,03388 | ATP2B3    | ATPase, Ca++ transporting, plasma membrane 3                                             |
| 0,992404375 | 0,93743 | 0,855002178 | 0,03883 | ATP2B3    | ATPase, Ca++ transporting, plasma membrane 3                                             |
| 0,842062954 | 0,46052 | 0,76950361  | 0,00562 | ATP2C1    | ATPase, Ca++ transporting, type 2C, member 1                                             |
| 0,628506687 | 0,13367 | 0,587230986 | 0,00002 | ATP2C1    | ATPase, Ca++ transporting, type 2C, member 1                                             |
| 0,675955417 | 0,07794 | 0,795536484 | 0,00547 | ATP2C1    | ATPase, Ca++ transporting, type 2C, member 1                                             |
| 0,784584098 | 0,06683 | 0,806641759 | 0,00361 | ATP2C2    | ATPase, Ca++ transporting, type 2C, member 2                                             |
| 1,123499903 | 0,2047  | 1,167967395 | 0,01116 | ATP2C2    | ATPase, Ca++ transporting, type 2C, member 2                                             |
| 1,048262476 | 0,6761  | 1,114966219 | 0,02746 | ATP4A     | ATPase, H+/K+ exchanging, alpha polypeptide                                              |
| 1,084477409 | 0,34856 | 1,294145654 | 0,00001 | ATP4B     | ATPase, H+/K+ exchanging, beta polypeptide                                               |
| 0,714992493 | 0,11251 | 0,893785162 | 0,03129 | ATP5A1    | ATP synthase, H+ transporting, mitochondrial F1 complex, alpha subunit 1, cardiac muscle |
| 0,84323111  | 0,26365 | 0,876605721 | 0,02921 | ATP5C1    | ATP synthase, H+ transporting, mitochondrial F1 complex, gamma polypeptide 1             |
| 0,84264683  | 0,2213  | 0,87417862  | 0,03981 | ATP5C1    | ATP synthase, H+ transporting, mitochondrial F1 complex, gamma polypeptide 1             |

|             |         |             |         |            |                                                                               |
|-------------|---------|-------------|---------|------------|-------------------------------------------------------------------------------|
| 0,839149637 | 0,22763 | 0,885767519 | 0,02464 | ATP5C1     | ATP synthase, H+ transporting, mitochondrial F1 complex, gamma polypeptide 1  |
| 0,998614666 | 0,99285 | 0,875998315 | 0,01567 | ATP5F1     | ATP synthase, H+ transporting, mitochondrial Fo complex, subunit B1           |
| 0,808320869 | 0,06706 | 0,871154192 | 0,01221 | ATP5I      | ATP synthase, H+ transporting, mitochondrial Fo complex, subunit E            |
| 0,824162085 | 0,22418 | 0,777546036 | 0,00102 | ATP5L      | ATP synthase, H+ transporting, mitochondrial Fo complex, subunit G            |
| 0,875998315 | 0,08536 | 0,79940583  | 0,00119 | ATP5S      | ATP synthase, H+ transporting, mitochondrial Fo complex, subunit s (factor B) |
| 0,880259014 | 0,5667  | 0,67877249  | 0,00002 | ATP5S      | ATP synthase, H+ transporting, mitochondrial Fo complex, subunit s (factor B) |
| 0,997922719 | 0,98323 | 0,793883931 | 0,00001 | ATP5S      | ATP synthase, H+ transporting, mitochondrial Fo complex, subunit s (factor B) |
| 0,890692901 | 0,178   | 0,853226098 | 0,02148 | ATP5SL     | ATP5S-like                                                                    |
| 1,071773463 | 0,4917  | 1,216722359 | 0,01073 | ATP6AP1L   | ATPase, H+ transporting, lysosomal accessory protein 1-like                   |
| 0,768437591 | 0,06411 | 0,881480158 | 0,0079  | ATP6AP2    | ATPase, H+ transporting, lysosomal accessory protein 2                        |
| 1,185092771 | 0,05085 | 1,195819797 | 0,01052 | ATP6VOA2   | ATPase, H+ transporting, lysosomal VO subunit a2                              |
| 0,901250463 | 0,43971 | 0,825877665 | 0,00383 | ATP6VOA2   | ATPase, H+ transporting, lysosomal VO subunit a2                              |
| 1,121166078 | 0,51333 | 1,141554707 | 0,01991 | ATP6VOB    | ATPase, H+ transporting, lysosomal 21kDa, VO subunit b                        |
| 0,724471077 | 0,21014 | 0,678302164 | 0,03134 | ATP6VOE1   | ATPase, H+ transporting, lysosomal 9kDa, VO subunit e1                        |
| 0,901875378 | 0,50168 | 0,883315051 | 0,03043 | ATP6V1A    | ATPase, H+ transporting, lysosomal 70kDa, V1 subunit A                        |
| 0,87175824  | 0,37914 | 0,876605721 | 0,01964 | ATP6V1C1   | ATPase, H+ transporting, lysosomal 42kDa, V1 subunit C1                       |
| 0,668500248 | 0,05726 | 0,759435845 | 0,00039 | ATP6V1D    | ATPase, H+ transporting, lysosomal 34kDa, V1 subunit D                        |
| 0,62546454  | 0,09155 | 0,789493887 | 0,00847 | ATP6V1D    | ATPase, H+ transporting, lysosomal 34kDa, V1 subunit D                        |
| 0,859756486 | 0,30608 | 0,859756486 | 0,02882 | ATP6V1G1   | ATPase, H+ transporting, lysosomal 13kDa, V1 subunit G1                       |
| 1,009751298 | 0,96187 | 0,871154192 | 0,02498 | ATP6V1G1   | ATPase, H+ transporting, lysosomal 13kDa, V1 subunit G1                       |
| 1,083725967 | 0,23521 | 1,143138335 | 0,04652 | ATP6V1G3   | ATPase, H+ transporting, lysosomal 13kDa, V1 subunit G3                       |
| 0,721464343 | 0,24894 | 0,674551267 | 0,00046 | ATP7A      | ATPase, Cu++ transporting, alpha polypeptide                                  |
| 0,868140228 | 0,62877 | 0,798298386 | 0,01028 | ATP7A      | ATPase, Cu++ transporting, alpha polypeptide                                  |
| 1,106497353 | 0,27803 | 1,148698355 | 0,0282  | ATP8A1     | ATPase, aminophospholipid transporter (APLT), class I, type 8A, member 1      |
| 0,879039561 | 0,6271  | 0,723467443 | 0,00768 | ATP8B1     | ATPase, aminophospholipid transporter, class I, type 8B, member 1             |
| 1,089752112 | 0,40028 | 1,138394029 | 0,02611 | ATP8B2     | ATPase, class I, type 8B, member 2                                            |
| 1,311302014 | 0,17267 | 1,450592208 | 0,00457 | ATP8B2     | ATPase, class I, type 8B, member 2                                            |
| 0,938871747 | 0,77205 | 0,835666959 | 0,00353 | ATP9A      | ATPase, class II, type 9A                                                     |
| 0,892546971 | 0,48382 | 0,813943185 | 0,00141 | ATP9B      | ATPase, class II, type 9B                                                     |
| 0,878430468 | 0,35327 | 1,139973273 | 0,04661 | ATP9B      | ATPase, class II, type 9B                                                     |
| 1,037419937 | 0,70566 | 1,167906737 | 0,0038  | ATPAF1-AS1 | ATPAF1 antisense RNA 1 (non-protein coding)                                   |
| 0,809442217 | 0,21859 | 0,768437591 | 0,00335 | ATPB4      | ATP binding domain 4                                                          |
| 0,800514811 | 0,05097 | 0,873572896 | 0,01197 | ATPIF1     | ATPase inhibitory factor 1                                                    |
| 0,946713631 | 0,56541 | 0,845572287 | 0,03704 | ATPIF1     | ATPase inhibitory factor 1                                                    |
| 0,747424624 | 0,12398 | 0,84264683  | 0,01493 | ATPIF1     | ATPase inhibitory factor 1                                                    |
| 0,73153561  | 0,06396 | 0,78024548  | 0,0006  | ATR        | ataxia telangiectasia and Rad3 related                                        |
| 0,873572896 | 0,55972 | 0,808881348 | 0,00695 | ATR        | ataxia telangiectasia and Rad3 related                                        |
| 0,549427109 | 0,06609 | 0,581560021 | 0,0003  | ATRX       | alpha thalassemia/mental retardation syndrome X-linked                        |
| 0,950000383 | 0,7465  | 0,81056512  | 0,01176 | ATXN1      | ataxin 1                                                                      |
| 1,0181852   | 0,95631 | 0,804408371 | 0,0016  | ATXN1      | ataxin 1                                                                      |
| 0,779704843 | 0,12734 | 0,795536484 | 0,00064 | ATXN1      | ataxin 1                                                                      |
| 0,955282936 | 0,8282  | 0,715984371 | 0,00309 | ATXN1L     | ataxin 1-like                                                                 |
| 1,048989328 | 0,63514 | 1,096571589 | 0,04452 | ATXN2      | ataxin 2                                                                      |
| 0,794985251 | 0,21991 | 0,835666959 | 0,01654 | ATXN3      | ataxin 3                                                                      |
| 0,822450069 | 0,295   | 0,798298386 | 0,04461 | ATXN3      | ataxin 3                                                                      |
| 0,831622098 | 0,4524  | 0,763658749 | 0,0012  | ATXN7      | ataxin 7                                                                      |
| 0,923382311 | 0,41471 | 0,79940583  | 0,01353 | ATXN7      | ataxin 7                                                                      |
| 0,973329374 | 0,78784 | 1,145517898 | 0,01149 | ATXN8OS    | ATXN8 opposite strand (non-protein coding)                                    |
| 0,944092419 | 0,58701 | 1,142346247 | 0,01128 | AURKA      | aurora kinase A                                                               |
| 0,880869374 | 0,13841 | 0,856188285 | 0,01777 | AURKAIP1   | aurora kinase A interacting protein 1                                         |
| 0,798851916 | 0,07221 | 0,807201075 | 0,01826 | AUTS2      | autism susceptibility candidate 2                                             |
| 0,903752727 | 0,33275 | 0,782954296 | 0       | AVEN       | apoptosis, caspase activation inhibitor                                       |
| 1,076240125 | 0,54831 | 0,929160674 | 0,04948 | AVL9       | AVL9 homolog (S. cerevisiae)                                                  |
| 0,844400887 | 0,41356 | 0,786762445 | 0,00027 | AVL9       | AVL9 homolog (S. cerevisiae)                                                  |
| 0,870550563 | 0,35057 | 1,21167266  | 0,02278 | AVP1       | arginine vasopressin-induced 1                                                |
| 1,053361036 | 0,41959 | 1,098092814 | 0,03397 | AVPR1A     | arginine vasopressin receptor 1A                                              |
| 1,131314463 | 0,2683  | 1,172834949 | 0,03395 | AVPR1B     | arginine vasopressin receptor 1B                                              |
| 1,082975046 | 0,49483 | 1,149494848 | 0,00603 | AVPR2      | arginine vasopressin receptor 2                                               |
| 1,018891197 | 0,80902 | 1,171210181 | 0,00429 | AWAT1      | acyl-CoA wax alcohol acyltransferase 1                                        |
| 1,093535457 | 0,34769 | 1,127400412 | 0,01528 | AXIN2      | axin 2                                                                        |
| 1,063632673 | 0,58243 | 1,179356592 | 0,00191 | AXIN2      | axin 2                                                                        |
| 0,90000193  | 0,51101 | 0,84323111  | 0,02166 | AZ12       | 5-azacytidine induced 2                                                       |
| 0,902500727 | 0,3893  | 0,856188285 | 0,00973 | AZ12       | 5-azacytidine induced 2                                                       |
| 1,056285625 | 0,50474 | 1,269270886 | 0,00008 | B3GALT1    | UDP-Gal:betaGlcNAc beta 1,3-galactosyltransferase, polypeptide 1              |
| 1,180174343 | 0,15826 | 1,120389214 | 0,023   | B3GALT1    | UDP-Gal:betaGlcNAc beta 1,3-galactosyltransferase, polypeptide 1              |
| 1,154285418 | 0,16075 | 1,194163187 | 0,01063 | B3GALT1    | beta 1,3-galactosyltransferase-like                                           |
| 1,180174343 | 0,2099  | 1,263127262 | 0,04088 | B3GAT3     | beta-1,3-glucuronosyltransferase 3 (glucuronosyltransferase I)                |
| 1,098854218 | 0,44675 | 1,149494848 | 0,01344 | B3GNT1     | UDP-GlcNAc:betaGal beta-1,3-N-acetylglucosaminyltransferase 1                 |
| 1,155085785 | 0,27832 | 1,124278924 | 0,03096 | B3GNT3     | UDP-GlcNAc:betaGal beta-1,3-N-acetylglucosaminyltransferase 3                 |
| 1,118837101 | 0,18028 | 1,156688184 | 0,00193 | B3GNT4     | UDP-GlcNAc:betaGal beta-1,3-N-acetylglucosaminyltransferase 4                 |
| 1,215036792 | 0,07651 | 1,120389214 | 0,03935 | B4GALNT1   | beta-1,4-N-acetyl-galactosaminyl transferase 1                                |
| 0,706127202 | 0,09418 | 0,804966138 | 0,00641 | B4GALNT3   | beta-1,4-N-acetyl-galactosaminyl transferase 3                                |
| 1,409320755 | 0,13685 | 1,371733289 | 0,00853 | B4GALT1    | UDP-Gal:betaGlcNAc beta 1,4- galactosyltransferase, polypeptide 1             |
| 1,363202607 | 0,20342 | 1,21335356  | 0,01745 | B4GALT5    | UDP-Gal:betaGlcNAc beta 1,4- galactosyltransferase, polypeptide 5             |
| 1,041743429 | 0,85744 | 0,765778999 | 0,00121 | B4GALT6    | UDP-Gal:betaGlcNAc beta 1,4- galactosyltransferase, polypeptide 6             |
| 1,219255094 | 0,27755 | 1,208317843 | 0,00581 | BACE2      | beta-site APP-cleaving enzyme 2                                               |
| 1,212512819 | 0,1994  | 1,241427492 | 0,00105 | BACE2      | beta-site APP-cleaving enzyme 2                                               |
| 0,894404902 | 0,50993 | 0,743806881 | 0,01558 | BACH1      | BTB and CNC homology 1, basic leucine zipper transcription factor 1           |
| 1,032398535 | 0,79489 | 1,163926534 | 0,03426 | BACH1      | BTB and CNC homology 1, basic leucine zipper transcription factor 1           |
| 0,635075491 | 0,12143 | 0,835666959 | 0,0059  | BAG1       | BCL2-associated athanogene                                                    |
| 0,582366793 | 0,05144 | 0,69399636  | 0,00004 | BAG1       | BCL2-associated athanogene                                                    |
| 1,074004472 | 0,52471 | 1,214194884 | 0,0059  | BAG2       | BCL2-associated athanogene 2                                                  |
| 0,732550437 | 0,08421 | 0,74277646  | 0,00543 | BAG4       | BCL2-associated athanogene 4                                                  |
| 0,846158597 | 0,41231 | 0,856188285 | 0,01769 | BAG4       | BCL2-associated athanogene 4                                                  |
| 0,558256481 | 0,11932 | 0,512278412 | 0       | BAG5       | BCL2-associated athanogene 5                                                  |
| 0,859160755 | 0,30131 | 0,816203046 | 0,00685 | BAIAP2     | BAI1-associated protein 2                                                     |
| 1,219255094 | 0,12594 | 1,236275261 | 0,00532 | BAIAP3     | BAI1-associated protein 3                                                     |
| 1,139183377 | 0,25948 | 1,230291345 | 0,00041 | BAIAP3     | BAI1-associated protein 3                                                     |
| 1,203303026 | 0,0676  | 1,190856849 | 0,02733 | BAK1       | BCL2-antagonist/killer 1                                                      |
| 0,940174203 | 0,53323 | 1,139183377 | 0,02848 | BANP       | BTG3 associated nuclear protein                                               |
| 0,885153765 | 0,48833 | 0,744838732 | 0,00002 | BARD1      | BRCA1 associated RING domain 1                                                |
| 0,84264683  | 0,51285 | 0,747424624 | 0,00143 | BARD1      | BRCA1 associated RING domain 1                                                |
| 1,120389214 | 0,41734 | 0,881480158 | 0,02601 | BARD1      | BRCA1 associated RING domain 1                                                |
| 1,0238469   | 0,8072  | 1,121943481 | 0,01897 | BARHL1     | BarH-like homeobox 1                                                          |
| 1,182631    | 0,28399 | 1,244874235 | 0,02375 | BARX1      | BARX homeobox 1                                                               |
| 1,234562607 | 0,07959 | 1,127834949 | 0,00686 | BATF3      | basic leucine zipper transcription factor, ATF-like 3                         |
| 1,235418637 | 0,21331 | 1,346300069 | 0,00469 | BAX        | BCL2-associated X protein                                                     |
| 0,712025098 | 0,37256 | 0,728499557 | 0,00002 | BAZ1A      | bromodomain adjacent to zinc finger domain, 1A                                |
| 0,810003474 | 0,35113 | 0,791685866 | 0,00494 | BAZ1A      | bromodomain adjacent to zinc finger domain, 1A                                |
| 0,966606097 | 0,69951 | 0,829894586 | 0,02015 | BBIP1      | BBSome interacting protein 1                                                  |
| 0,933679945 | 0,65344 | 0,820172911 | 0,02477 | BBIP1      | BBSome interacting protein 1                                                  |
| 0,905633983 | 0,29758 | 0,872967591 | 0,03712 | BBS5       | Bardet-Biedl syndrome 5                                                       |
| 0,76630998  | 0,19768 | 0,66342257  | 0,00018 | BBS7       | Bardet-Biedl syndrome 7                                                       |
| 0,760489377 | 0,28551 | 0,692074858 | 0,00176 | BBS7       | Bardet-Biedl syndrome 7                                                       |

|             |         |             |         |         |                                                                                      |
|-------------|---------|-------------|---------|---------|--------------------------------------------------------------------------------------|
| 0,8962667   | 0,36363 | 0,902500727 | 0,0463  | BBS9    | Bardet-Biedl syndrome 9                                                              |
| 1,396678532 | 0,12479 | 1,200803427 | 0,0445  | BBX     | bobby sox homolog (Drosophila)                                                       |
| 0,857376037 | 0,46095 | 1,145517898 | 0,02557 | BBX     | bobby sox homolog (Drosophila)                                                       |
| 1,111108729 | 0,15228 | 1,153485605 | 0,01844 | BCAN    | brevican                                                                             |
| 1,106497353 | 0,43932 | 1,132883885 | 0,00724 | BCAN    | brevican                                                                             |
| 1,082224645 | 0,29421 | 1,231144413 | 0,00007 | BCAN    | brevican                                                                             |
| 0,814507563 | 0,21787 | 0,740719899 | 0,02175 | BCAP29  | B-cell receptor-associated protein 29                                                |
| 0,949342121 | 0,79298 | 0,78132788  | 0,00559 | BCAP29  | B-cell receptor-associated protein 29                                                |
| 0,771105413 | 0,10374 | 0,855002178 | 0,04967 | BCAP29  | B-cell receptor-associated protein 29                                                |
| 0,765248385 | 0,05094 | 0,702222438 | 0,00005 | BCAP29  | B-cell receptor-associated protein 29                                                |
| 1,107264584 | 0,40871 | 1,356604327 | 0,00053 | BCAP29  | B-cell receptor-associated protein 29                                                |
| 0,903752727 | 0,39112 | 0,876605721 | 0,04984 | CCIP    | BRCA2 and CDKN1A interacting protein                                                 |
| 0,961260928 | 0,6553  | 0,872362706 | 0,01245 | BCDIN3D | BCDIN3 domain containing                                                             |
| 1,02313747  | 0,80029 | 1,098092814 | 0,03078 | BCKDHA  | branched chain keto acid dehydrogenase E1, alpha polypeptide                         |
| 0,839731493 | 0,20365 | 0,796640096 | 0,01371 | BCKDHB  | branched chain keto acid dehydrogenase E1, beta polypeptide                          |
| 1,107264584 | 0,49805 | 1,172022284 | 0,01692 | BCKDK   | branched chain ketoacid dehydrogenase kinase                                         |
| 1,143930973 | 0,35827 | 1,275444392 | 0,00438 | BCL10   | B-cell CLL/lymphoma 10                                                               |
| 0,714992493 | 0,31783 | 0,787307977 | 0,0383  | BCL11A  | B-cell CLL/lymphoma 11A (zinc finger protein)                                        |
| 0,620713746 | 0,16904 | 0,711531731 | 0,00163 | BCL11B  | B-cell CLL/lymphoma 11B (zinc finger protein)                                        |
| 1,101141598 | 0,17067 | 1,209155676 | 0,02532 | BCL2    | B-cell CLL/lymphoma 2                                                                |
| 1,128964405 | 0,65299 | 1,263127262 | 0,00217 | BCL2L1  | BCL2-like 1                                                                          |
| 1,020304659 | 0,85869 | 1,174461971 | 0,01347 | BCL2L11 | BCL2-like 11 (apoptosis facilitator)                                                 |
| 1,031683179 | 0,81489 | 1,21167266  | 0,01313 | BCL2L11 | BCL2-like 11 (apoptosis facilitator)                                                 |
| 1,491744027 | 0,05996 | 1,380317353 | 0,01585 | BCL2L11 | BCL2-like 11 (apoptosis facilitator)                                                 |
| 1,096571589 | 0,31525 | 1,168777249 | 0,00115 | BCL2L11 | BCL2-like 11 (apoptosis facilitator)                                                 |
| 1,124278924 | 0,09725 | 1,140763716 | 0,01485 | BCL2L14 | BCL2-like 14 (apoptosis facilitator)                                                 |
| 1,076986376 | 0,43866 | 1,175276328 | 0,01177 | BCL2L15 | BCL2-like 15                                                                         |
| 1,156688184 | 0,29326 | 1,4054187   | 0,00358 | BCL6    | B-cell CLL/lymphoma 6                                                                |
| 1,184271612 | 0,05297 | 1,282536603 | 0,00131 | BCL6    | B-cell CLL/lymphoma 6                                                                |
| 1,108032348 | 0,32381 | 1,236275261 | 0,00068 | BCL6B   | B-cell CLL/lymphoma 6, member B                                                      |
| 1,155886707 | 0,26705 | 1,248330549 | 0,00261 | BCL6B   | B-cell CLL/lymphoma 6, member B                                                      |
| 0,743806881 | 0,25961 | 0,765248385 | 0,02232 | BCLAF1  | BCL2-associated transcription factor 1                                               |
| 0,788400174 | 0,186   | 0,768970416 | 0,01526 | BCMO1   | beta-carotene 15,15'-monooxygenase 1                                                 |
| 1,111879158 | 0,37777 | 1,184271612 | 0,03364 | BCO2    | beta-carotene oxygenase 2                                                            |
| 1,018891197 | 0,90725 | 0,814507563 | 0,02341 | BCOR    | BCL6 corepressor                                                                     |
| 1,110338834 | 0,61189 | 0,865136691 | 0,02266 | BCOR    | BCL6 corepressor                                                                     |
| 1,056285625 | 0,54874 | 1,167158102 | 0,00212 | BCORL1  | BCL6 corepressor-like 1                                                              |
| 1,043188594 | 0,71773 | 1,118061851 | 0,01999 | BCRP3   | breakpoint cluster region pseudogene 3                                               |
| 1,113421618 | 0,32403 | 1,168777249 | 0,0066  | BDH1    | 3-hydroxybutyrate dehydrogenase, type 1                                              |
| 0,844986384 | 0,12826 | 0,904379378 | 0,04161 | BDH2    | 3-hydroxybutyrate dehydrogenase, type 2                                              |
| 0,85797053  | 0,4498  | 0,743806881 | 0,00507 | BDP1    | B double prime 1, subunit of RNA polymerase III transcription initiation factor IIIB |
| 0,95159722  | 0,95664 | 0,777546036 | 0,00957 | BEAN1   | brain expressed, associated with NEDD4, 1                                            |
| 0,801625329 | 0,09918 | 0,831622098 | 0,00037 | BECN1   | beclin 1, autophagy related                                                          |
| 1,217566019 | 0,05441 | 1,294145654 | 0,00056 | BEST1   | bestrophin 1                                                                         |
| 0,946713631 | 0,51063 | 1,131314463 | 0,03117 | BEST1   | bestrophin 1                                                                         |
| 1,139973273 | 0,27378 | 1,134455485 | 0,00927 | BEST1   | bestrophin 1                                                                         |
| 1,097331938 | 0,37291 | 1,136029265 | 0,02271 | BEST2   | bestrophin 2                                                                         |
| 1,205807828 | 0,35218 | 1,337927555 | 0,00096 | BET1L   | blocked early in transport 1 homolog (S. cerevisiae)-like                            |
| 0,927873476 | 0,67262 | 0,782411782 | 0,00302 | BEX2    | brain expressed X-linked 2                                                           |
| 0,712518807 | 0,05246 | 0,772175133 | 0,03685 | BEX4    | brain expressed, X-linked 4                                                          |
| 1,112650121 | 0,53098 | 1,187559666 | 0,02139 | BFAR    | bifunctional apoptosis regulator                                                     |
| 0,839149637 | 0,19708 | 0,886381699 | 0,0256  | BFSP1   | beaded filament structural protein 1, filensin                                       |
| 1,107264584 | 0,68165 | 1,426025717 | 0,01451 | BGN     | biglycan                                                                             |
| 1,274560627 | 0,0741  | 1,238848698 | 0,04797 | BHLHE41 | basic helix-loop-helix family, member e41                                            |
| 1,217566019 | 0,22149 | 1,31494276  | 0,00239 | BHLHE41 | basic helix-loop-helix family, member e41                                            |
| 1,010451446 | 0,93982 | 1,250062303 | 0,00863 | BHMT    | betaine-homocysteine S-methyltransferase                                             |
| 1,136816973 | 0,09881 | 1,115739322 | 0,02235 | BHMT2   | betaine-homocysteine S-methyltransferase 2                                           |
| 1,263127262 | 0,07983 | 1,346300069 | 0,00061 | BICD1   | bicaudal D homolog 1 (Drosophila)                                                    |
| 0,528142813 | 0,07719 | 0,599985691 | 0,00025 | BICD2   | bicaudal D homolog 2 (Drosophila)                                                    |
| 0,586824089 | 0,14221 | 0,721464343 | 0,00011 | BICD2   | bicaudal D homolog 2 (Drosophila)                                                    |
| 1,151887642 | 0,38394 | 1,217566019 | 0,01275 | BIN1    | bridging integrator 1                                                                |
| 1,129747215 | 0,44619 | 1,220946513 | 0,03549 | BIN1    | bridging integrator 1                                                                |
| 1,02313747  | 0,85051 | 1,163926534 | 0,02695 | BIN3    | bridging integrator 3                                                                |
| 0,918276162 | 0,66977 | 0,847919965 | 0,03412 | BIRC2   | baculoviral IAP repeat containing 2                                                  |
| 1,018891197 | 0,86335 | 1,124278924 | 0,04624 | BIRC5   | baculoviral IAP repeat containing 5                                                  |
| 0,878430468 | 0,54347 | 0,887611337 | 0,04989 | BIRC6   | baculoviral IAP repeat containing 6                                                  |
| 1,071030823 | 0,43363 | 1,085981856 | 0,03158 | BIVM    | basic, immunoglobulin-like variable motif containing                                 |
| 0,955945318 | 0,67035 | 0,808320869 | 0,00835 | BLNK    | B-cell linker                                                                        |
| 1,10343374  | 0,2991  | 1,192508872 | 0,03255 | BLOC1S3 | biogenesis of lysosomal organelles complex-1, subunit 3                              |
| 0,656506563 | 0,11087 | 0,696888619 | 0,00103 | BLZF1   | basic leucine zipper nuclear factor 1                                                |
| 0,672683604 | 0,05842 | 0,641268301 | 0,00598 | BLZF1   | basic leucine zipper nuclear factor 1                                                |
| 1,082975046 | 0,60726 | 1,227735684 | 0,00252 | BMP1    | bone morphogenetic protein 1                                                         |
| 1,352848231 | 0,11666 | 1,53581027  | 0,00084 | BMP1    | bone morphogenetic protein 1                                                         |
| 1,232852325 | 0,23219 | 1,330529041 | 0,00065 | BMP1    | bone morphogenetic protein 1                                                         |
| 1,090507733 | 0,55347 | 1,25092908  | 0,00404 | BMP1    | bone morphogenetic protein 1                                                         |
| 1,026689546 | 0,89856 | 0,743806881 | 0,00083 | BMP2K   | BMP2 inducible kinase                                                                |
| 0,988970916 | 0,96389 | 0,737645729 | 0,00004 | BMP2K   | BMP2 inducible kinase                                                                |
| 0,71946679  | 0,05355 | 0,625898229 | 0,00001 | BMP2K   | BMP2 inducible kinase                                                                |
| 1,004167543 | 0,9879  | 0,724471077 | 0,00086 | BMP2K   | BMP2 inducible kinase                                                                |
| 1,073260286 | 0,48865 | 1,214194884 | 0,00209 | BMP6    | bone morphogenetic protein 6                                                         |
| 1,143930973 | 0,44552 | 1,178539408 | 0,00263 | BMP8A   | bone morphogenetic protein 8a                                                        |
| 0,87539133  | 0,32093 | 0,844986384 | 0,0135  | BMPR1A  | bone morphogenetic protein receptor, type IA                                         |
| 0,829894586 | 0,47002 | 0,770571108 | 0,00398 | BMPR1A  | bone morphogenetic protein receptor, type IA                                         |
| 0,720464874 | 0,23653 | 0,815072332 | 0,03171 | BMPR1B  | bone morphogenetic protein receptor, type IB                                         |
| 0,706127202 | 0,05267 | 0,800514811 | 0,00082 | BMS1    | BMS1 homolog, ribosome assembly protein (yeast)                                      |
| 0,660211421 | 0,06552 | 0,681601304 | 0       | BNC1    | basonuclin 1                                                                         |
| 0,90062598  | 0,59801 | 0,792784137 | 0,00397 | BNIP2   | BCL2/adenovirus E1B 19kDa interacting protein 2                                      |
| 0,744322628 | 0,20396 | 0,755759964 | 0,00147 | BNIP2   | BCL2/adenovirus E1B 19kDa interacting protein 2                                      |
| 0,558643569 | 0,05525 | 0,638164384 | 0,00212 | BNIP3   | BCL2/adenovirus E1B 19kDa interacting protein 3                                      |
| 0,741747467 | 0,11226 | 0,796088099 | 0,00189 | BNIP3L  | BCL2/adenovirus E1B 19kDa interacting protein 3-like                                 |
| 1,035982764 | 0,67856 | 0,918912883 | 0,03118 | BOD1    | biorientation of chromosomes in cell division 1                                      |
| 0,665725807 | 0,1599  | 0,657927263 | 0,00374 | BOD1L   | biorientation of chromosomes in cell division 1-like                                 |
| 0,980779004 | 0,86085 | 1,140763716 | 0,03224 | BOLL    | bol, boule-like (Drosophila)                                                         |
| 0,949342121 | 0,63065 | 1,17609125  | 0,02476 | BPIFA1  | BPI fold containing family A, member 1                                               |
| 1,148698355 | 0,19292 | 1,121943481 | 0,01348 | BPIFA3  | BPI fold containing family A, member 3                                               |
| 1,10343374  | 0,26296 | 1,209155676 | 0,02195 | BPIFA4P | BPI fold containing family A, member 4, pseudogene                                   |
| 1,121943481 | 0,26123 | 1,132098902 | 0,00357 | BPIFB1  | BPI fold containing family B, member 1                                               |
| 1,151887642 | 0,24863 | 1,216722359 | 0,00097 | BPIFB2  | BPI fold containing family B, member 2                                               |
| 1,095811766 | 0,27622 | 1,156688184 | 0,02211 | BPIFB4  | BPI fold containing family B, member 4                                               |
| 1,185092771 | 0,06317 | 1,145517898 | 0,01542 | BPIFB6  | BPI fold containing family B, member 6                                               |
| 1,141554707 | 0,56536 | 0,807760778 | 0,00054 | BPNT1   | 3'(2'), 5'-bisphosphate nucleotidase 1                                               |
| 0,718968266 | 0,28909 | 0,807760778 | 0,00204 | BPTF    | bromodomain PHD finger transcription factor                                          |
| 1,01395948  | 0,95683 | 0,815637493 | 0,00694 | BPTF    | bromodomain PHD finger transcription factor                                          |
| 0,885153765 | 0,56973 | 0,85027416  | 0,00306 | BPTF    | bromodomain PHD finger transcription factor                                          |



|             |         |             |         |           |                                                                                                         |
|-------------|---------|-------------|---------|-----------|---------------------------------------------------------------------------------------------------------|
| 0,875998315 | 0,62517 | 0,84264683  | 0,00578 | BPTF      | bromodomain PHD finger transcription factor                                                             |
| 0,936921447 | 0,52341 | 1,180174343 | 0,00665 | BPY2      | basic charge, Y-linked, 2                                                                               |
| 0,719965659 | 0,1197  | 0,71400199  | 0,036   | BRAF      | v-raf murine sarcoma viral oncogene homolog B1                                                          |
| 0,811689581 | 0,13496 | 0,845572287 | 0,0186  | BRAP      | BRCA1 associated protein                                                                                |
| 0,775930854 | 0,055   | 0,853226098 | 0,00673 | BRAP      | BRCA1 associated protein                                                                                |
| 0,737134609 | 0,10113 | 0,778085177 | 0,02958 | BRAP      | BRCA1 associated protein                                                                                |
| 0,848507902 | 0,19638 | 0,89688816  | 0,03708 | BRD3      | bromodomain containing 3                                                                                |
| 0,622437118 | 0,15647 | 0,732042848 | 0,00005 | BRD7      | bromodomain containing 7                                                                                |
| 0,884540435 | 0,22907 | 0,762072415 | 0,00184 | BRD7      | bromodomain containing 7                                                                                |
| 0,953959551 | 0,8212  | 1,155085785 | 0,03299 | BRI3      | brain protein I3                                                                                        |
| 0,874784765 | 0,28904 | 0,856188285 | 0,01562 | BRIP1     | BRCA1 interacting protein C-terminal helicase 1                                                         |
| 0,76154437  | 0,11169 | 0,790589117 | 0,00164 | BRIP1     | BRCA1 interacting protein C-terminal helicase 1                                                         |
| 0,822450069 | 0,07661 | 0,851453708 | 0,00143 | BRIX1     | BRX1, biogenesis of ribosomes, homolog (S. cerevisiae)                                                  |
| 0,946713631 | 0,74368 | 0,838568184 | 0,02662 | BRMS1L    | breast cancer metastasis-suppressor 1-like                                                              |
| 0,877213549 | 0,46698 | 0,824733549 | 0,00182 | BRMS1L    | breast cancer metastasis-suppressor 1-like                                                              |
| 0,874784765 | 0,18308 | 0,844986384 | 0,04099 | BRP44     | brain protein 44                                                                                        |
| 0,90062598  | 0,55186 | 0,786217292 | 0,00382 | BRP44     | brain protein 44                                                                                        |
| 1,085981856 | 0,44911 | 0,87539133  | 0,02566 | BRP44L    | brain protein 44-like                                                                                   |
| 0,844986384 | 0,216   | 0,877821798 | 0,00953 | BRPF1     | bromodomain and PHD finger containing, 1                                                                |
| 1,054091423 | 0,66105 | 1,159899655 | 0,01451 | BRPF3     | bromodomain and PHD finger containing, 3                                                                |
| 1,128964405 | 0,2249  | 1,129747215 | 0,04398 | BRSK2     | BR serine/threonine kinase 2                                                                            |
| 0,931740429 | 0,71464 | 0,791685866 | 0,02145 | BRWD1     | bromodomain and WD repeat domain containing 1                                                           |
| 0,832198735 | 0,07392 | 0,825305409 | 0,04912 | BRWD1     | bromodomain and WD repeat domain containing 1                                                           |
| 0,938871747 | 0,43727 | 0,81056512  | 0,00677 | BRWD1     | bromodomain and WD repeat domain containing 1                                                           |
| 0,85027416  | 0,35248 | 0,863938187 | 0,0403  | BRWD1     | bromodomain and WD repeat domain containing 1                                                           |
| 0,882702996 | 0,64726 | 0,848507902 | 0,04433 | BRWD1     | bromodomain and WD repeat domain containing 1                                                           |
| 0,630688704 | 0,08208 | 0,733058379 | 0,00027 | BRWD1     | bromodomain and WD repeat domain containing 1                                                           |
| 1,035982764 | 0,77404 | 0,855595026 | 0,03415 | BRWD1     | bromodomain and WD repeat domain containing 1                                                           |
| 1,01395948  | 0,90975 | 0,876605721 | 0,04414 | BRWD3     | bromodomain and WD repeat domain containing 3                                                           |
| 1,172022284 | 0,36145 | 1,332374825 | 0,00045 | BSCL2     | Berardinelli-Seip congenital lipodystrophy 2 (seipin)                                                   |
| 1,154285418 | 0,64755 | 1,21335356  | 0,04191 | BSG       | basigin (OK blood group)                                                                                |
| 1,111879158 | 0,16652 | 1,214194884 | 0,00084 | BSN       | bassoon (presynaptic cytomatrix protein)                                                                |
| 1,063632673 | 0,48469 | 1,150291893 | 0,01175 | BSND      | Bartter syndrome, infantile, with sensorineural deafness (Barttin)                                      |
| 0,788400174 | 0,16625 | 0,824733549 | 0,00424 | BTA1F     | BTA1F RNA polymerase II, B-TFIIID transcription factor-associated, 170kDa (Mot1 homolog, S. cerevisiae) |
| 0,79940583  | 0,2825  | 0,72597914  | 0       | BTBD1     | BTB (POZ) domain containing 1                                                                           |
| 0,852044095 | 0,32515 | 0,801069878 | 0,00111 | BTBD10    | BTB (POZ) domain containing 10                                                                          |
| 0,617709319 | 0,17156 | 0,611320139 | 0,00111 | BTBD11    | BTB (POZ) domain containing 11                                                                          |
| 0,89688816  | 0,27885 | 0,84264683  | 0,00451 | BTBD18    | BTB (POZ) domain containing 18                                                                          |
| 0,939522749 | 0,70035 | 0,786762445 | 0,00001 | BTBD7     | BTB (POZ) domain containing 7                                                                           |
| 0,754712984 | 0,06937 | 0,803293997 | 0,0009  | BTBD7     | BTB (POZ) domain containing 7                                                                           |
| 0,683967652 | 0,21352 | 0,734584317 | 0,00027 | BTBD7     | BTB (POZ) domain containing 7                                                                           |
| 0,722465199 | 0,07516 | 0,772175133 | 0,00007 | BTBD7     | BTB (POZ) domain containing 7                                                                           |
| 0,957271458 | 0,70348 | 0,844986384 | 0,00162 | BTBD9     | BTB (POZ) domain containing 9                                                                           |
| 1,296839555 | 0,28441 | 0,882091365 | 0,02091 | BTC       | betacellulin                                                                                            |
| 0,944747041 | 0,54275 | 1,105730653 | 0,02861 | BTD       | biotinidase                                                                                             |
| 0,736113431 | 0,07635 | 0,720964436 | 0,00158 | BTFL3L4   | basic transcription factor 3-like 4                                                                     |
| 0,827023368 | 0,27089 | 0,801069878 | 0,03073 | BTG3      | BTG family, member 3                                                                                    |
| 1,066585781 | 0,56406 | 1,25962998  | 0,00159 | BTN1A1    | butyrophilin, subfamily 1, member A1                                                                    |
| 1,099616149 | 0,32633 | 1,182631    | 0,00781 | BTN2A1    | butyrophilin, subfamily 2, member A1                                                                    |
| 1,092020546 | 0,26297 | 1,163120042 | 0,00654 | BTN2A2    | butyrophilin, subfamily 2, member A2                                                                    |
| 1,180174343 | 0,05805 | 1,174461971 | 0,00542 | BTN2A2    | butyrophilin, subfamily 2, member A2                                                                    |
| 1,264879542 | 0,05901 | 1,280759861 | 0,00312 | BTN3A1    | butyrophilin, subfamily 3, member A1                                                                    |
| 1,168777249 | 0,65229 | 1,549711862 | 0,00002 | BTN3A2    | butyrophilin, subfamily 3, member A2                                                                    |
| 1,333298677 | 0,07467 | 1,350037985 | 0,00074 | BTN3A2    | butyrophilin, subfamily 3, member A2                                                                    |
| 1,257884972 | 0,33644 | 1,366987452 | 0,0012  | BTN3A3    | butyrophilin, subfamily 3, member A3                                                                    |
| 1,166349937 | 0,1131  | 1,283425898 | 0,0002  | BTNL2     | butyrophilin-like 2 (MHC class II associated)                                                           |
| 1,207480591 | 0,15492 | 1,224336392 | 0,00085 | BTNL9     | butyrophilin-like 9                                                                                     |
| 1,057750964 | 0,47176 | 1,096571589 | 0,03787 | BTNL9     | butyrophilin-like 9                                                                                     |
| 1,104964485 | 0,42989 | 1,215879283 | 0,01594 | BTNL9     | butyrophilin-like 9                                                                                     |
| 0,908148418 | 0,50963 | 0,865136691 | 0,00279 | BUB3      | budding uninhibited by benzimidazoles 3 homolog (yeast)                                                 |
| 0,951318276 | 0,58618 | 0,835666959 | 0,01655 | BUD13     | BUD13 homolog (S. cerevisiae)                                                                           |
| 0,621574834 | 0,08995 | 0,823020345 | 0,00104 | BUD31     | BUD31 homolog (S. cerevisiae)                                                                           |
| 1,169587664 | 0,10204 | 1,185092771 | 0,00027 | BVES      | blood vessel epicardial substance                                                                       |
| 0,866937564 | 0,28827 | 0,865136691 | 0,0449  | BYSL      | bystin-like                                                                                             |
| 1,156688184 | 0,11576 | 1,21167266  | 0,00336 | C10orf103 | chromosome 10 open reading frame 103                                                                    |
| 0,974004269 | 0,78194 | 1,101905116 | 0,03085 | C10orf114 | chromosome 10 open reading frame 114                                                                    |
| 1,049716684 | 0,52932 | 1,107264584 | 0,02373 | C10orf114 | chromosome 10 open reading frame 114                                                                    |
| 0,817335328 | 0,42717 | 0,754190038 | 0,01285 | C10orf118 | chromosome 10 open reading frame 118                                                                    |
| 0,97874165  | 0,85612 | 0,873572896 | 0,02316 | C10orf12  | chromosome 10 open reading frame 12                                                                     |
| 1,301341855 | 0,09307 | 1,293248932 | 0,00112 | C10orf125 | chromosome 10 open reading frame 125                                                                    |
| 0,959264119 | 0,8292  | 0,865136691 | 0,04942 | C10orf137 | chromosome 10 open reading frame 137                                                                    |
| 1,021720083 | 0,8531  | 0,863938187 | 0,00125 | C10orf18  | chromosome 10 open reading frame 18                                                                     |
| 0,857376037 | 0,38418 | 0,779704843 | 0,01019 | C10orf18  | chromosome 10 open reading frame 18                                                                     |
| 0,821880187 | 0,06399 | 0,677832163 | 0,00453 | C10orf18  | chromosome 10 open reading frame 18                                                                     |
| 1,22010051  | 0,08545 | 1,111108729 | 0,04808 | C10orf27  | chromosome 10 open reading frame 27                                                                     |
| 0,956081858 | 0,77265 | 0,789493887 | 0,00355 | C10orf32  | chromosome 10 open reading frame 32                                                                     |
| 1,062159186 | 0,43141 | 0,847332435 | 0,00214 | C10orf46  | chromosome 10 open reading frame 46                                                                     |
| 0,750019495 | 0,36658 | 0,838568184 | 0,04423 | C10orf46  | chromosome 10 open reading frame 46                                                                     |
| 0,920187651 | 0,31508 | 0,868140228 | 0,02693 | C10orf47  | chromosome 10 open reading frame 47                                                                     |
| 1,009051634 | 0,96654 | 0,709561678 | 0,00803 | C10orf47  | chromosome 10 open reading frame 47                                                                     |
| 0,995159722 | 0,95885 | 1,111108729 | 0,04417 | C10orf53  | chromosome 10 open reading frame 53                                                                     |
| 1,309485423 | 0,05815 | 1,186736798 | 0,01247 | C10orf53  | chromosome 10 open reading frame 53                                                                     |
| 1,173648178 | 0,29952 | 1,23370717  | 0,04811 | C10orf54  | chromosome 10 open reading frame 54                                                                     |
| 1,150291893 | 0,07279 | 1,181811547 | 0,00637 | C10orf67  | chromosome 10 open reading frame 67                                                                     |
| 0,911933166 | 0,54591 | 0,847919965 | 0,01097 | C10orf76  | chromosome 10 open reading frame 76                                                                     |
| 1,148698355 | 0,10375 | 1,125838586 | 0,04528 | C10orf85  | chromosome 10 open reading frame 85                                                                     |
| 1,224336392 | 0,11421 | 1,189207115 | 0,02505 | C10orf88  | chromosome 10 open reading frame 88                                                                     |
| 1,159899655 | 0,09722 | 1,136029265 | 0,01367 | C10orf93  | chromosome 10 open reading frame 93                                                                     |
| 1,136816973 | 0,23464 | 1,110338834 | 0,04026 | C10orf96  | chromosome 10 open reading frame 96                                                                     |
| 1,038139271 | 0,83914 | 1,229438867 | 0,00027 | C11orf10  | chromosome 11 open reading frame 10                                                                     |
| 1,110338834 | 0,31272 | 1,139183377 | 0,00974 | C11orf16  | chromosome 11 open reading frame 16                                                                     |
| 1,214194884 | 0,0642  | 1,263127262 | 0,00221 | C11orf20  | chromosome 11 open reading frame 20                                                                     |
| 1,299539062 | 0,11536 | 1,286097483 | 0,00717 | C11orf24  | chromosome 11 open reading frame 24                                                                     |
| 1,108032348 | 0,53067 | 0,893785162 | 0,01038 | C11orf31  | chromosome 11 open reading frame 31                                                                     |
| 1,178539408 | 0,05025 | 0,875998315 | 0,01309 | C11orf41  | chromosome 11 open reading frame 41                                                                     |
| 1,082224645 | 0,43508 | 1,114966219 | 0,03313 | C11orf42  | chromosome 11 open reading frame 42                                                                     |
| 1,07997656  | 0,42939 | 1,189207115 | 0,00262 | C11orf53  | chromosome 11 open reading frame 53                                                                     |
| 0,865136691 | 0,54492 | 0,817902059 | 0,01907 | C11orf54  | chromosome 11 open reading frame 54                                                                     |
| 0,908778116 | 0,71186 | 0,85086373  | 0,0298  | C11orf54  | chromosome 11 open reading frame 54                                                                     |
| 0,990342872 | 0,93691 | 0,835666959 | 0,03059 | C11orf57  | chromosome 11 open reading frame 57                                                                     |
| 0,989656656 | 0,91602 | 0,863938187 | 0,00255 | C11orf57  | chromosome 11 open reading frame 57                                                                     |
| 0,786217292 | 0,18767 | 0,847332435 | 0,03435 | C11orf57  | chromosome 11 open reading frame 57                                                                     |
| 0,974679631 | 0,8515  | 0,879649076 | 0,01618 | C11orf57  | chromosome 11 open reading frame 57                                                                     |
| 0,922103118 | 0,53076 | 0,888226796 | 0,02653 | C11orf58  | chromosome 11 open reading frame 58                                                                     |

|             |         |             |         |           |                                      |
|-------------|---------|-------------|---------|-----------|--------------------------------------|
| 0,774319028 | 0,07749 | 0,758383773 | 0,00108 | C11orf58  | chromosome 11 open reading frame 58  |
| 0,868742185 | 0,39899 | 0,797192477 | 0,00004 | C11orf58  | chromosome 11 open reading frame 58  |
| 0,948684315 | 0,8082  | 0,730522189 | 0,00031 | C11orf61  | chromosome 11 open reading frame 61  |
| 1,071773463 | 0,64104 | 1,190856849 | 0,00735 | C11orf71  | chromosome 11 open reading frame 71  |
| 0,76630998  | 0,06941 | 0,863938187 | 0,01209 | C11orf73  | chromosome 11 open reading frame 73  |
| 1,068065408 | 0,35283 | 1,144724161 | 0,01143 | C11orf85  | chromosome 11 open reading frame 85  |
| 1,128182137 | 0,32534 | 1,383190629 | 0,03172 | C11orf92  | chromosome 11 open reading frame 92  |
| 1,002081605 | 0,98751 | 1,158292806 | 0,02494 | C11orf95  | chromosome 11 open reading frame 95  |
| 0,971980988 | 0,89651 | 0,786217292 | 0,00633 | C12orf26  | chromosome 12 open reading frame 26  |
| 0,795536484 | 0,05547 | 0,793883931 | 0,00284 | C12orf32  | chromosome 12 open reading frame 32  |
| 1,071030823 | 0,52553 | 1,189207115 | 0,01693 | C12orf34  | chromosome 12 open reading frame 34  |
| 0,782954296 | 0,08616 | 0,859756486 | 0,03712 | C12orf4   | chromosome 12 open reading frame 4   |
| 0,911933166 | 0,43844 | 0,825305409 | 0,0152  | C12orf41  | chromosome 12 open reading frame 41  |
| 1,069547088 | 0,44662 | 1,137605228 | 0,01753 | C12orf42  | chromosome 12 open reading frame 42  |
| 0,868140228 | 0,44964 | 0,743291492 | 0,00003 | C12orf48  | chromosome 12 open reading frame 48  |
| 0,875998315 | 0,42056 | 0,762072415 | 0,02434 | C12orf5   | chromosome 12 open reading frame 5   |
| 1,067325338 | 0,65822 | 0,879039561 | 0,03824 | C12orf51  | chromosome 12 open reading frame 51  |
| 1,203303026 | 0,0627  | 1,095052471 | 0,04972 | C12orf51  | chromosome 12 open reading frame 51  |
| 1,205807828 | 0,16903 | 1,154285418 | 0,00835 | C12orf53  | chromosome 12 open reading frame 53  |
| 0,881480158 | 0,57157 | 0,754190038 | 0,00107 | C12orf56  | chromosome 12 open reading frame 56  |
| 0,8362464   | 0,50241 | 0,639936207 | 0,00026 | C12orf66  | chromosome 12 open reading frame 66  |
| 1,010451446 | 0,94636 | 0,822450069 | 0,00158 | C12orf66  | chromosome 12 open reading frame 66  |
| 0,753667455 | 0,05732 | 0,797192477 | 0,00149 | C12orf66  | chromosome 12 open reading frame 66  |
| 0,959292921 | 0,72141 | 0,840313752 | 0,00392 | C12orf73  | chromosome 12 open reading frame 73  |
| 0,84264683  | 0,27586 | 0,738669032 | 0,00723 | C12orf75  | chromosome 12 open reading frame 75  |
| 1,123499903 | 0,26087 | 0,842062954 | 0,00975 | C13orf27  | chromosome 13 open reading frame 27  |
| 1,048262476 | 0,59562 | 1,135242102 | 0,04803 | C13orf41  | chromosome 13 open reading frame 41  |
| 0,823020345 | 0,0882  | 0,855002178 | 0,02217 | C14orf1   | chromosome 14 open reading frame 1   |
| 0,963261894 | 0,88599 | 0,859160755 | 0,03692 | C14orf101 | chromosome 14 open reading frame 101 |
| 1,014662547 | 0,84592 | 1,157490217 | 0,01888 | C14orf105 | chromosome 14 open reading frame 105 |
| 0,857376037 | 0,12699 | 0,805524291 | 0,00491 | C14orf109 | chromosome 14 open reading frame 109 |
| 0,787853886 | 0,30408 | 0,791137301 | 0,00223 | C14orf118 | chromosome 14 open reading frame 118 |
| 1,065846736 | 0,81701 | 0,732550437 | 0,01034 | C14orf118 | chromosome 14 open reading frame 118 |
| 0,939522749 | 0,81406 | 0,793333843 | 0,01232 | C14orf118 | chromosome 14 open reading frame 118 |
| 1,136816973 | 0,42437 | 0,840896415 | 0,01639 | C14orf126 | chromosome 14 open reading frame 126 |
| 0,990342872 | 0,96449 | 0,768970416 | 0,00039 | C14orf126 | chromosome 14 open reading frame 126 |
| 1,020304659 | 0,84541 | 0,869947353 | 0,03417 | C14orf128 | chromosome 14 open reading frame 128 |
| 0,843815796 | 0,43232 | 0,791137301 | 0,00213 | C14orf129 | chromosome 14 open reading frame 129 |
| 0,968618189 | 0,88063 | 0,817902059 | 0,02843 | C14orf135 | chromosome 14 open reading frame 135 |
| 0,90000193  | 0,46609 | 0,746389192 | 0,01963 | C14orf142 | chromosome 14 open reading frame 142 |
| 0,910038824 | 0,19818 | 0,828744904 | 0,00884 | C14orf149 | chromosome 14 open reading frame 149 |
| 1,018891197 | 0,85445 | 1,256142381 | 0,0012  | C14orf159 | chromosome 14 open reading frame 159 |
| 0,965936329 | 0,77175 | 0,905633983 | 0,03965 | C14orf180 | chromosome 14 open reading frame 180 |
| 1,320422841 | 0,05895 | 1,484523571 | 0,00012 | C14orf34  | chromosome 14 open reading frame 34  |
| 0,882702996 | 0,34966 | 0,840896415 | 0,01047 | C14orf43  | chromosome 14 open reading frame 43  |
| 0,950000383 | 0,64944 | 0,792234811 | 0,00048 | C14orf43  | chromosome 14 open reading frame 43  |
| 1,207480591 | 0,12043 | 1,139183377 | 0,02434 | C14orf48  | chromosome 14 open reading frame 48  |
| 1,099616149 | 0,23796 | 1,270150983 | 0,00043 | C14orf70  | chromosome 14 open reading frame 70  |
| 0,955282936 | 0,73514 | 0,849684999 | 0,0097  | C15orf24  | chromosome 15 open reading frame 24  |
| 0,866336856 | 0,54851 | 0,744322628 | 0,00012 | C15orf29  | chromosome 15 open reading frame 29  |
| 0,813379198 | 0,20903 | 0,720964436 | 0,00033 | C15orf29  | chromosome 15 open reading frame 29  |
| 0,5913155   | 0,09688 | 0,563700206 | 0,00004 | C15orf29  | chromosome 15 open reading frame 29  |
| 1,048989328 | 0,54189 | 1,107264584 | 0,02378 | C15orf33  | chromosome 15 open reading frame 33  |
| 0,821880187 | 0,28458 | 0,763129604 | 0,0013  | C15orf40  | chromosome 15 open reading frame 40  |
| 0,882091365 | 0,26889 | 0,834509281 | 0,0189  | C15orf41  | chromosome 15 open reading frame 41  |
| 1,031683179 | 0,65852 | 0,897510051 | 0,01192 | C15orf41  | chromosome 15 open reading frame 41  |
| 1,149494848 | 0,37665 | 1,171210181 | 0,02183 | C15orf42  | chromosome 15 open reading frame 42  |
| 0,931740429 | 0,52228 | 1,184271612 | 0,00582 | C15orf55  | chromosome 15 open reading frame 55  |
| 1,183451022 | 0,08187 | 1,336074078 | 0,00036 | C15orf55  | chromosome 15 open reading frame 55  |
| 1,185092771 | 0,17668 | 1,255271991 | 0,00915 | C15orf57  | chromosome 15 open reading frame 57  |
| 1,048989328 | 0,70333 | 1,17609125  | 0,03604 | C15orf59  | chromosome 15 open reading frame 59  |
| 0,986916546 | 0,91946 | 0,803293997 | 0,00122 | C15orf61  | chromosome 15 open reading frame 61  |
| 1,085981856 | 0,37324 | 1,129747215 | 0,02852 | C16orf11  | chromosome 16 open reading frame 11  |
| 1,074004472 | 0,48557 | 1,150291893 | 0,01649 | C16orf3   | chromosome 16 open reading frame 3   |
| 0,791685866 | 0,17358 | 0,793883931 | 0,04418 | C16orf42  | chromosome 16 open reading frame 42  |
| 1,124278924 | 0,20471 | 1,180992661 | 0,00313 | C16orf45  | chromosome 16 open reading frame 45  |
| 1,155085785 | 0,14631 | 1,145517898 | 0,01327 | C16orf46  | chromosome 16 open reading frame 46  |
| 0,929160674 | 0,68314 | 0,804408371 | 0,00424 | C16orf52  | chromosome 16 open reading frame 52  |
| 0,983502074 | 0,91324 | 0,882702996 | 0,01797 | C16orf52  | chromosome 16 open reading frame 52  |
| 1,026689546 | 0,87169 | 0,818469182 | 0,00553 | C16orf52  | chromosome 16 open reading frame 52  |
| 1,070288698 | 0,68647 | 1,297738767 | 0,00071 | C16orf53  | chromosome 16 open reading frame 53  |
| 1,051172909 | 0,55583 | 0,770037174 | 0,00589 | C16orf53  | chromosome 16 open reading frame 53  |
| 1,089752112 | 0,49559 | 1,22858698  | 0,01329 | C16orf57  | chromosome 16 open reading frame 57  |
| 1,136029265 | 0,45509 | 1,319507911 | 0,00436 | C16orf58  | chromosome 16 open reading frame 58  |
| 0,885767519 | 0,2064  | 0,822450069 | 0,00004 | C16orf61  | chromosome 16 open reading frame 61  |
| 1,134455485 | 0,29387 | 1,176906737 | 0,00584 | C16orf71  | chromosome 16 open reading frame 71  |
| 0,888842681 | 0,54765 | 0,789493887 | 0,00182 | C16orf72  | chromosome 16 open reading frame 72  |
| 0,84264683  | 0,36679 | 0,856781955 | 0,04304 | C16orf72  | chromosome 16 open reading frame 72  |
| 1,030253954 | 0,79197 | 1,190856849 | 0,01269 | C16orf79  | chromosome 16 open reading frame 79  |
| 1,111108729 | 0,17639 | 1,128964405 | 0,02302 | C16orf82  | chromosome 16 open reading frame 82  |
| 0,847332435 | 0,06225 | 0,8362464   | 0,00154 | C16orf88  | chromosome 16 open reading frame 88  |
| 0,885153765 | 0,14187 | 0,856188285 | 0,00331 | C16orf91  | chromosome 16 open reading frame 91  |
| 1,040300267 | 0,69196 | 1,144724161 | 0,00257 | C17orf103 | chromosome 17 open reading frame 103 |
| 1,152686347 | 0,33878 | 0,915733686 | 0,01816 | C17orf104 | chromosome 17 open reading frame 104 |
| 1,163120042 | 0,26166 | 1,197478705 | 0,01164 | C17orf28  | chromosome 17 open reading frame 28  |
| 0,781869643 | 0,10164 | 0,84264683  | 0,03028 | C17orf42  | chromosome 17 open reading frame 42  |
| 0,778624691 | 0,10641 | 0,736623843 | 0,00105 | C17orf42  | chromosome 17 open reading frame 42  |
| 1,114193651 | 0,19695 | 1,220946513 | 0,00021 | C17orf46  | chromosome 17 open reading frame 46  |
| 1,053361036 | 0,58946 | 1,17609125  | 0,01539 | C17orf47  | chromosome 17 open reading frame 47  |
| 0,998614666 | 0,98235 | 1,107264584 | 0,02771 | C17orf50  | chromosome 17 open reading frame 50  |
| 1,021012126 | 0,83528 | 1,137605228 | 0,01624 | C17orf52  | chromosome 17 open reading frame 52  |
| 0,85027416  | 0,22965 | 1,128182137 | 0,03515 | C17orf56  | chromosome 17 open reading frame 56  |
| 0,823020345 | 0,06497 | 0,743291492 | 0,00008 | C17orf58  | chromosome 17 open reading frame 58  |
| 1,173648178 | 0,21854 | 1,171210181 | 0,01373 | C17orf61  | chromosome 17 open reading frame 61  |
| 1,086734863 | 0,5711  | 1,20163605  | 0,04996 | C17orf63  | chromosome 17 open reading frame 63  |
| 1,143930973 | 0,23313 | 1,192508872 | 0,00076 | C17orf65  | chromosome 17 open reading frame 65  |
| 0,87539133  | 0,2753  | 0,716977624 | 0,0001  | C17orf69  | chromosome 17 open reading frame 69  |
| 0,793883931 | 0,05033 | 0,774855931 | 0,00164 | C17orf75  | chromosome 17 open reading frame 75  |
| 0,995159722 | 0,97741 | 1,113421618 | 0,03421 | C17orf81  | chromosome 17 open reading frame 81  |
| 0,852044095 | 0,3023  | 0,821310701 | 0,01411 | C17orf85  | chromosome 17 open reading frame 85  |
| 1,066585781 | 0,61379 | 1,28877463  | 0,00836 | C18orf1   | chromosome 18 open reading frame 1   |
| 0,559418551 | 0,07146 | 0,811127156 | 0,02935 | C18orf10  | chromosome 18 open reading frame 10  |
| 0,991716731 | 0,89354 | 0,90000193  | 0,04821 | C18orf10  | chromosome 18 open reading frame 10  |
| 1,121166078 | 0,20054 | 1,155085785 | 0,02064 | C18orf12  | chromosome 18 open reading frame 12  |

|             |         |             |         |              |                                                                                     |
|-------------|---------|-------------|---------|--------------|-------------------------------------------------------------------------------------|
| 0,853817714 | 0,30481 | 0,820172911 | 0,00487 | C18orf19     | chromosome 18 open reading frame 19                                                 |
| 0,828744904 | 0,33016 | 0,724973416 | 0,00037 | C18orf19     | chromosome 18 open reading frame 19                                                 |
| 0,997231251 | 0,97684 | 0,809442217 | 0,00241 | C18orf19     | chromosome 18 open reading frame 19                                                 |
| 0,929160674 | 0,3538  | 0,905006463 | 0,03307 | C18orf21     | chromosome 18 open reading frame 21                                                 |
| 0,750539549 | 0,26872 | 0,752623374 | 0,02266 | C18orf25     | chromosome 18 open reading frame 25                                                 |
| 1,124278924 | 0,39797 | 1,140763716 | 0,0303  | C18orf54     | chromosome 18 open reading frame 54                                                 |
| 0,853226098 | 0,2982  | 0,77271055  | 0,00003 | C18orf55     | chromosome 18 open reading frame 55                                                 |
| 0,783497187 | 0,07736 | 0,671286251 | 0,00003 | C18orf55     | chromosome 18 open reading frame 55                                                 |
| 1,423063461 | 0,4079  | 1,513616793 | 0,00002 | C19orf10     | chromosome 19 open reading frame 10                                                 |
| 0,967947027 | 0,83784 | 0,808881348 | 0,00462 | C19orf12     | chromosome 19 open reading frame 12                                                 |
| 1,054822317 | 0,78887 | 0,87417862  | 0,04717 | C19orf2      | chromosome 19 open reading frame 2                                                  |
| 0,595015848 | 0,07251 | 0,641268301 | 0,00057 | C19orf2      | chromosome 19 open reading frame 2                                                  |
| 0,635956503 | 0,06342 | 0,790041312 | 0,00141 | C19orf2      | chromosome 19 open reading frame 2                                                  |
| 0,87175824  | 0,66511 | 0,693515485 | 0,00006 | C19orf2      | chromosome 19 open reading frame 2                                                  |
| 1,147902414 | 0,21957 | 1,370782805 | 0,00001 | C19orf21     | chromosome 19 open reading frame 21                                                 |
| 0,974004269 | 0,81926 | 1,22858698  | 0,00432 | C19orf25     | chromosome 19 open reading frame 25                                                 |
| 1,076986376 | 0,38695 | 1,142346247 | 0,0341  | C19orf26     | chromosome 19 open reading frame 26                                                 |
| 1,193335743 | 0,1711  | 1,226884977 | 0,00305 | C19orf29     | chromosome 19 open reading frame 29                                                 |
| 1,066585781 | 0,4777  | 1,16634937  | 0,00598 | C19orf34     | chromosome 19 open reading frame 34                                                 |
| 0,78024548  | 0,16572 | 0,752623374 | 0,00102 | C19orf43     | chromosome 19 open reading frame 43                                                 |
| 0,955282936 | 0,65056 | 1,105730653 | 0,02783 | C19orf44     | chromosome 19 open reading frame 44                                                 |
| 1,038139271 | 0,70743 | 1,141554707 | 0,01342 | C19orf45     | chromosome 19 open reading frame 45                                                 |
| 1,030968319 | 0,78031 | 1,21335356  | 0,00135 | C19orf45     | chromosome 19 open reading frame 45                                                 |
| 1,131314463 | 0,27795 | 1,141554707 | 0,0362  | C19orf46     | chromosome 19 open reading frame 46                                                 |
| 1,025267238 | 0,79896 | 1,16634937  | 0,03271 | C19orf50     | chromosome 19 open reading frame 50                                                 |
| 1,119612889 | 0,20877 | 1,231998073 | 0,00109 | C19orf51     | chromosome 19 open reading frame 51                                                 |
| 0,837406488 | 0,4203  | 1,121943481 | 0,03949 | C19orf53     | chromosome 19 open reading frame 53                                                 |
| 0,79940583  | 0,07977 | 0,877213549 | 0,03184 | C19orf55     | chromosome 19 open reading frame 55                                                 |
| 1,080725402 | 0,6597  | 1,188383105 | 0,04209 | C19orf60     | chromosome 19 open reading frame 60                                                 |
| 1,095052471 | 0,56903 | 1,332374825 | 0,00256 | C19orf60     | chromosome 19 open reading frame 60                                                 |
| 0,977385766 | 0,8918  | 1,187559666 | 0,0376  | C19orf63     | chromosome 19 open reading frame 63                                                 |
| 1,20664392  | 0,16252 | 1,129747215 | 0,02897 | C19orf66     | chromosome 19 open reading frame 66                                                 |
| 0,958599438 | 0,8218  | 0,722465199 | 0,00258 | C1D          | C1D nuclear receptor corepressor                                                    |
| 1,002081605 | 0,98851 | 0,870550563 | 0,02385 | C1GALT1      | core 1 synthase, glycoprotein-N-acetylgalactosamine 3-beta-galactosyltransferase, 1 |
| 0,773782497 | 0,266   | 0,641268301 | 0,00096 | C1GALT1      | core 1 synthase, glycoprotein-N-acetylgalactosamine 3-beta-galactosyltransferase, 1 |
| 1,111879158 | 0,42891 | 0,923382311 | 0,02793 | C1orf101     | chromosome 1 open reading frame 101                                                 |
| 0,945402117 | 0,76031 | 0,775930854 | 0,0028  | C1orf109     | chromosome 1 open reading frame 109                                                 |
| 0,976031761 | 0,76153 | 0,910669834 | 0,03504 | C1orf110     | chromosome 1 open reading frame 110                                                 |
| 0,976708529 | 0,82954 | 1,150291893 | 0,00417 | C1orf112     | chromosome 1 open reading frame 112                                                 |
| 1,018891197 | 0,88652 | 1,101141598 | 0,03446 | C1orf123     | chromosome 1 open reading frame 123                                                 |
| 0,928516852 | 0,64476 | 0,803293997 | 0,01157 | C1orf124     | chromosome 1 open reading frame 124                                                 |
| 0,996540263 | 0,97278 | 1,163926534 | 0,01314 | C1orf127     | chromosome 1 open reading frame 127                                                 |
| 1,041021598 | 0,66979 | 1,109569472 | 0,01537 | C1orf144     | chromosome 1 open reading frame 144                                                 |
| 1,059952783 | 0,52722 | 1,174461971 | 0,00311 | C1orf158     | chromosome 1 open reading frame 158                                                 |
| 1,029540083 | 0,76511 | 1,264003098 | 0,00244 | C1orf159     | chromosome 1 open reading frame 159                                                 |
| 0,814507563 | 0,0568  | 0,849684999 | 0,01421 | C1orf174     | chromosome 1 open reading frame 174                                                 |
| 1,170398641 | 0,17511 | 1,350974085 | 0,00005 | C1orf182     | chromosome 1 open reading frame 182                                                 |
| 1,121943481 | 0,26742 | 1,17772279  | 0,00122 | C1orf183     | chromosome 1 open reading frame 183                                                 |
| 1,046810282 | 0,76162 | 1,132098902 | 0,01792 | C1orf183     | chromosome 1 open reading frame 183                                                 |
| 1,194163187 | 0,09227 | 1,17772279  | 0,02721 | C1orf186     | chromosome 1 open reading frame 186                                                 |
| 1,144724161 | 0,08328 | 1,226884977 | 0,01079 | C1orf187     | chromosome 1 open reading frame 187                                                 |
| 1,218410264 | 0,10194 | 1,215036792 | 0,00149 | C1orf190     | chromosome 1 open reading frame 190                                                 |
| 1,139183377 | 0,23335 | 1,170222284 | 0,00385 | C1orf194     | chromosome 1 open reading frame 194                                                 |
| 0,768970416 | 0,12494 | 0,87539133  | 0,02714 | C1orf198     | chromosome 1 open reading frame 198                                                 |
| 1,051901779 | 0,62111 | 1,147107024 | 0,00965 | C1orf200     | chromosome 1 open reading frame 200                                                 |
| 0,877821798 | 0,3342  | 0,883315051 | 0,01169 | C1orf201     | chromosome 1 open reading frame 201                                                 |
| 0,891310496 | 0,21371 | 0,870550563 | 0,03836 | C1orf201     | chromosome 1 open reading frame 201                                                 |
| 0,747424624 | 0,08834 | 0,726986259 | 0,00005 | C1orf21      | chromosome 1 open reading frame 21                                                  |
| 0,8362464   | 0,07213 | 0,857376037 | 0,00412 | C1orf220     | chromosome 1 open reading frame 220                                                 |
| 1,0181852   | 0,86383 | 1,226884977 | 0,00127 | C1orf222     | chromosome 1 open reading frame 222                                                 |
| 0,997922719 | 0,98002 | 1,088997015 | 0,02034 | C1orf227     | chromosome 1 open reading frame 227                                                 |
| 1,004167543 | 0,97723 | 1,163926534 | 0,01056 | C1orf228     | chromosome 1 open reading frame 228                                                 |
| 1,011853201 | 0,9036  | 1,130530567 | 0,01476 | C1orf228     | chromosome 1 open reading frame 228                                                 |
| 0,918276162 | 0,43399 | 0,837406488 | 0,00401 | C1orf27      | chromosome 1 open reading frame 27                                                  |
| 0,797192477 | 0,11825 | 0,918276162 | 0,04996 | C1orf43      | chromosome 1 open reading frame 43                                                  |
| 0,873572896 | 0,39279 | 0,790041312 | 0,00172 | C1orf52      | chromosome 1 open reading frame 52                                                  |
| 1,151887642 | 0,51236 | 0,759962428 | 0,00722 | C1orf53      | chromosome 1 open reading frame 53                                                  |
| 1,060687741 | 0,74006 | 0,812815602 | 0,04508 | C1orf55      | chromosome 1 open reading frame 55                                                  |
| 0,859160755 | 0,4673  | 0,717972255 | 0,00329 | C1orf56      | chromosome 1 open reading frame 56                                                  |
| 1,022428531 | 0,81058 | 1,102669163 | 0,04143 | C1orf56      | chromosome 1 open reading frame 56                                                  |
| 1,085981856 | 0,34586 | 1,134455485 | 0,02487 | C1orf61      | chromosome 1 open reading frame 61                                                  |
| 1,073260286 | 0,45973 | 1,215036792 | 0,00022 | C1orf61      | chromosome 1 open reading frame 61                                                  |
| 0,789493887 | 0,60743 | 0,846745312 | 0,04918 | C1orf63      | chromosome 1 open reading frame 63                                                  |
| 1,003471749 | 0,98205 | 1,167967395 | 0,01551 | C1orf85      | chromosome 1 open reading frame 85                                                  |
| 1,012554807 | 0,94386 | 1,219255094 | 0,00279 | C1orf85      | chromosome 1 open reading frame 85                                                  |
| 1,180174343 | 0,14299 | 1,121166078 | 0,02758 | C1orf86      | chromosome 1 open reading frame 86                                                  |
| 1,048262476 | 0,64633 | 1,100378609 | 0,04305 | C1orf86      | chromosome 1 open reading frame 86                                                  |
| 0,996540263 | 0,98535 | 0,819036698 | 0,03441 | C1orf9       | chromosome 1 open reading frame 9                                                   |
| 1,178539408 | 0,09036 | 1,165541198 | 0,03538 | C1orf95      | chromosome 1 open reading frame 95                                                  |
| 1,193335743 | 0,06529 | 1,121166078 | 0,01752 | C1orf96      | chromosome 1 open reading frame 96                                                  |
| 1,011152081 | 0,95493 | 0,832775771 | 0,02388 | C1orf96      | chromosome 1 open reading frame 96                                                  |
| 1,698192493 | 0,05184 | 1,882956929 | 0       | C1QA         | complement component 1, q subcomponent, A chain                                     |
| 1,35754498  | 0,26254 | 1,730273381 | 0,00001 | C1QB         | complement component 1, q subcomponent, B chain                                     |
| 0,726482525 | 0,09146 | 0,751059963 | 0,00619 | C1QBP        | complement component 1, q subcomponent binding protein                              |
| 1,2397077   | 0,10771 | 1,278099363 | 0,00118 | C1QL1        | complement component 1, q subcomponent-like 1                                       |
| 1,061423209 | 0,6358  | 1,141554707 | 0,02586 | C1QTNF1      | C1q and tumor necrosis factor related protein 1                                     |
| 1,162314108 | 0,28709 | 1,400556321 | 0,00261 | C1QTNF6      | C1q and tumor necrosis factor related protein 6                                     |
| 1,054091423 | 0,88305 | 1,427014506 | 0,0006  | C1R          | complement component 1, r subcomponent                                              |
| 1,106497353 | 0,56551 | 1,134455485 | 0,02832 | C1RL         | complement component 1, r subcomponent-like                                         |
| 1,116512962 | 0,16181 | 1,176906737 | 0,00473 | C1RL         | complement component 1, r subcomponent-like                                         |
| 1,194163187 | 0,36835 | 1,504203751 | 0,00069 | C1S          | complement component 1, s subcomponent                                              |
| 1,276328769 | 0,13522 | 1,379360922 | 0,00012 | C2           | complement component 2                                                              |
| 0,930449658 | 0,59561 | 0,894404902 | 0,02992 | C20orf152    | chromosome 20 open reading frame 152                                                |
| 1,182631    | 0,09833 | 1,138394029 | 0,04014 | C20orf160    | chromosome 20 open reading frame 160                                                |
| 1,125058485 | 0,21361 | 1,185914499 | 0,00622 | C20orf166-AS | C20orf166 antisense RNA 1 (non-protein coding)                                      |
| 0,922742493 | 0,67064 | 0,864537231 | 0,03007 | C20orf177    | chromosome 20 open reading frame 177                                                |
| 1,090507733 | 0,34071 | 1,32408891  | 0,00129 | C20orf181    | chromosome 20 open reading frame 181                                                |
| 1,117287138 | 0,35722 | 1,124278924 | 0,008   | C20orf187    | chromosome 20 open reading frame 187                                                |
| 1,072516617 | 0,38572 | 1,173648178 | 0,00048 | C20orf201    | chromosome 20 open reading frame 201                                                |
| 1,092777739 | 0,39397 | 1,240567298 | 0,00037 | C20orf202    | chromosome 20 open reading frame 202                                                |
| 1,10343374  | 0,29267 | 1,262252032 | 0,00037 | C20orf203    | chromosome 20 open reading frame 203                                                |
| 1,07549439  | 0,40481 | 0,865136691 | 0,0255  | C20orf24     | chromosome 20 open reading frame 24                                                 |
| 0,804966138 | 0,16818 | 0,886996305 | 0,04023 | C20orf29     | chromosome 20 open reading frame 29                                                 |
| 1,149494848 | 0,22553 | 1,129747215 | 0,01934 | C20orf3      | chromosome 20 open reading frame 3                                                  |

|             |         |             |         |          |                                               |
|-------------|---------|-------------|---------|----------|-----------------------------------------------|
| 1,108800644 | 0,42033 | 1,189207115 | 0,01919 | C2orf3   | chromosome 20 open reading frame 3            |
| 1,130530567 | 0,16567 | 1,216722359 | 0,01568 | C2orf46  | chromosome 20 open reading frame 46           |
| 1,190856849 | 0,07348 | 1,385109468 | 0,00001 | C2orf54  | chromosome 20 open reading frame 54           |
| 1           | 0,99714 | 1,143138335 | 0,0337  | C2orf62  | chromosome 20 open reading frame 62           |
| 1,098854218 | 0,36127 | 1,214194884 | 0,0007  | C2orf62  | chromosome 20 open reading frame 62           |
| 1,021720083 | 0,80377 | 1,162314108 | 0,02697 | C2orf96  | chromosome 20 open reading frame 96           |
| 1,090507733 | 0,3908  | 1,172834949 | 0,00376 | C2orf104 | chromosome 21 open reading frame 104          |
| 1,038139271 | 0,56587 | 1,120389214 | 0,04959 | C2orf104 | chromosome 21 open reading frame 104          |
| 1,118061851 | 0,40707 | 1,224336392 | 0,03247 | C2orf2   | chromosome 21 open reading frame 2            |
| 1,074004472 | 0,59182 | 1,139973273 | 0,01564 | C2orf49  | chromosome 21 open reading frame 49           |
| 0,999307093 | 0,99713 | 1,217566019 | 0,03426 | C2orf56  | chromosome 21 open reading frame 56           |
| 1,093535457 | 0,52187 | 1,279872414 | 0,00849 | C2orf58  | chromosome 21 open reading frame 58           |
| 0,837406488 | 0,28633 | 0,871154192 | 0,0396  | C2orf59  | chromosome 21 open reading frame 59           |
| 1,094293701 | 0,29816 | 1,155085785 | 0,01397 | C2orf62  | chromosome 21 open reading frame 62           |
| 0,974004269 | 0,71601 | 1,113421618 | 0,03516 | C2orf67  | chromosome 21 open reading frame 67           |
| 1,156688184 | 0,18353 | 1,151887642 | 0,0334  | C2orf67  | chromosome 21 open reading frame 67           |
| 1,059952783 | 0,52101 | 1,073260286 | 0,04475 | C2orf88  | chromosome 21 open reading frame 88           |
| 0,943438251 | 0,59168 | 1,112650121 | 0,02125 | C2orf88  | chromosome 21 open reading frame 88           |
| 0,596254436 | 0,05001 | 0,733058379 | 0,00073 | C2orf91  | chromosome 21 open reading frame 91           |
| 1,075494939 | 0,47797 | 1,165541198 | 0,00687 | C2orf24  | chromosome 22 open reading frame 24           |
| 1,208317843 | 0,09323 | 1,133669413 | 0,03768 | C2orf34  | chromosome 22 open reading frame 34           |
| 1,004167543 | 0,96044 | 0,848507902 | 0,00325 | C2orf39  | chromosome 22 open reading frame 39           |
| 0,930449658 | 0,66537 | 1,189207115 | 0,00498 | C2CD2    | C2 calcium-dependent domain containing 2      |
| 0,940174203 | 0,5055  | 1,131314463 | 0,02791 | C2CD3    | C2 calcium-dependent domain containing 3      |
| 0,928516852 | 0,35871 | 1,128964405 | 0,02642 | C2orf16  | chromosome 2 open reading frame 16            |
| 1,055553718 | 0,59482 | 1,227735684 | 0,00633 | C2orf18  | chromosome 2 open reading frame 18            |
| 1,136029265 | 0,12747 | 1,229438867 | 0,00287 | C2orf27A | chromosome 2 open reading frame 27A           |
| 1,32317144  | 0,09651 | 1,147107024 | 0,00934 | C2orf28  | chromosome 2 open reading frame 28            |
| 1,011852011 | 0,93713 | 0,853226098 | 0,01111 | C2orf3   | chromosome 2 open reading frame 3             |
| 0,777546036 | 0,05333 | 0,765248385 | 0,00014 | C2orf3   | chromosome 2 open reading frame 3             |
| 1,051901779 | 0,68863 | 1,167158102 | 0,00651 | C2orf44  | chromosome 2 open reading frame 44            |
| 0,819036698 | 0,06187 | 0,763658749 | 0,00017 | C2orf47  | chromosome 2 open reading frame 47            |
| 0,835087919 | 0,30848 | 0,77916458  | 0,00211 | C2orf49  | chromosome 2 open reading frame 49            |
| 1,012554807 | 0,88377 | 0,884540435 | 0,02658 | C2orf53  | chromosome 2 open reading frame 53            |
| 0,898755127 | 0,36828 | 0,87417862  | 0,0163  | C2orf56  | chromosome 2 open reading frame 56            |
| 1,098854218 | 0,49076 | 1,260503392 | 0,00081 | C2orf61  | chromosome 2 open reading frame 61            |
| 1,108800644 | 0,22969 | 1,137605228 | 0,023   | C2orf65  | chromosome 2 open reading frame 65            |
| 0,821310701 | 0,30079 | 0,733566672 | 0,02197 | C2orf67  | chromosome 2 open reading frame 67            |
| 0,797192477 | 0,10086 | 0,745355193 | 0,00669 | C2orf68  | chromosome 2 open reading frame 68            |
| 0,69640574  | 0,09636 | 0,660211421 | 0,00003 | C2orf69  | chromosome 2 open reading frame 69            |
| 0,73153561  | 0,1376  | 0,685866644 | 0,00011 | C2orf69  | chromosome 2 open reading frame 69            |
| 1,04608494  | 0,56768 | 1,155085785 | 0,00246 | C2orf70  | chromosome 2 open reading frame 70            |
| 1,20664392  | 0,10444 | 1,262252032 | 0,00167 | C2orf72  | chromosome 2 open reading frame 72            |
| 0,784040454 | 0,2559  | 0,692074858 | 0,00007 | C2orf76  | chromosome 2 open reading frame 76            |
| 1,181811547 | 0,10822 | 1,316766922 | 0,00018 | C2orf81  | chromosome 2 open reading frame 81            |
| 1,278099363 | 0,0549  | 1,144724161 | 0,03097 | C3orf18  | chromosome 3 open reading frame 18            |
| 1,340712592 | 0,05073 | 1,267512522 | 0,02695 | C3orf20  | chromosome 3 open reading frame 20            |
| 1,015366101 | 0,91201 | 0,846745312 | 0,0068  | C3orf23  | chromosome 3 open reading frame 23            |
| 0,674551267 | 0,09037 | 0,716480825 | 0,00515 | C3orf23  | chromosome 3 open reading frame 23            |
| 1,120389214 | 0,30508 | 1,173648178 | 0,00341 | C3orf24  | chromosome 3 open reading frame 24            |
| 0,717972255 | 0,07475 | 0,714992493 | 0,00007 | C3orf26  | chromosome 3 open reading frame 26            |
| 1,157490217 | 0,08207 | 1,190031696 | 0,01204 | C3orf32  | chromosome 3 open reading frame 32            |
| 1,014662547 | 0,88115 | 1,155085785 | 0,01423 | C3orf35  | chromosome 3 open reading frame 35            |
| 1,113421618 | 0,22376 | 1,125058485 | 0,04517 | C3orf36  | chromosome 3 open reading frame 36            |
| 0,907519155 | 0,25677 | 0,877821798 | 0,00635 | C3orf38  | chromosome 3 open reading frame 38            |
| 1,015366101 | 0,94679 | 0,77916458  | 0,03726 | C3orf38  | chromosome 3 open reading frame 38            |
| 0,806082831 | 0,0548  | 0,752101876 | 0,01817 | C3orf51  | chromosome 3 open reading frame 51            |
| 0,993092495 | 0,97274 | 0,732550437 | 0,00252 | C3orf52  | chromosome 3 open reading frame 52            |
| 1,095052471 | 0,29583 | 1,167967395 | 0,00055 | C3orf56  | chromosome 3 open reading frame 56            |
| 0,76154437  | 0,194   | 0,741747467 | 0,00075 | C3orf58  | chromosome 3 open reading frame 58            |
| 0,71640088  | 0,15805 | 0,832775771 | 0,01356 | C3orf63  | chromosome 3 open reading frame 63            |
| 1,063632673 | 0,56734 | 0,918912883 | 0,01443 | C3orf66  | chromosome 3 open reading frame 66            |
| 0,85595026  | 0,49776 | 0,670821112 | 0,00007 | C3orf67  | chromosome 3 open reading frame 67            |
| 1,120389214 | 0,2336  | 1,172834949 | 0,01383 | C3orf75  | chromosome 3 open reading frame 75            |
| 0,988285652 | 0,90785 | 1,110338834 | 0,03947 | C3orf75  | chromosome 3 open reading frame 75            |
| 0,783497187 | 0,11782 | 0,791685866 | 0,0025  | C3orf78  | chromosome 3 open reading frame 78            |
| 0,979420298 | 0,81632 | 1,140763716 | 0,02551 | C4BPA    | complement component 4 binding protein, alpha |
| 0,906890329 | 0,48649 | 0,843815796 | 0,03966 | C4orf10  | chromosome 4 open reading frame 10            |
| 1,006257823 | 0,95797 | 1,120389214 | 0,02417 | C4orf10  | chromosome 4 open reading frame 10            |
| 0,735603373 | 0,08746 | 0,892546971 | 0,04258 | C4orf14  | chromosome 4 open reading frame 14            |
| 1,159899655 | 0,16111 | 1,136029265 | 0,0277  | C4orf17  | chromosome 4 open reading frame 17            |
| 0,902500727 | 0,26434 | 0,744322628 | 0,03395 | C4orf19  | chromosome 4 open reading frame 19            |
| 0,928516852 | 0,46588 | 0,767905135 | 0,00599 | C4orf19  | chromosome 4 open reading frame 19            |
| 1,02313747  | 0,78567 | 0,909408252 | 0,04311 | C4orf27  | chromosome 4 open reading frame 27            |
| 0,76630998  | 0,06639 | 0,7944344   | 0,00033 | C4orf27  | chromosome 4 open reading frame 27            |
| 0,757333158 | 0,1939  | 0,745872013 | 0,00014 | C4orf3   | chromosome 4 open reading frame 3             |
| 0,643940815 | 0,09137 | 0,708087719 | 0,00137 | C4orf3   | chromosome 4 open reading frame 3             |
| 0,927873476 | 0,69759 | 0,687294348 | 0,00144 | C4orf32  | chromosome 4 open reading frame 32            |
| 1,008352455 | 0,92914 | 0,812815602 | 0,0003  | C4orf32  | chromosome 4 open reading frame 32            |
| 0,772175133 | 0,10226 | 0,799960128 | 0,0182  | C4orf33  | chromosome 4 open reading frame 33            |
| 0,695923196 | 0,05997 | 0,740719899 | 0,00948 | C4orf41  | chromosome 4 open reading frame 41            |
| 0,973329374 | 0,88837 | 0,793333843 | 0,0044  | C4orf43  | chromosome 4 open reading frame 43            |
| 1,16634937  | 0,50195 | 0,833353207 | 0,04685 | C4orf46  | chromosome 4 open reading frame 46            |
| 1,471206746 | 0,12112 | 1,35754498  | 0,00078 | C4orf7   | chromosome 4 open reading frame 7             |
| 1,039579435 | 0,69594 | 1,219255094 | 0,00521 | C5orf20  | chromosome 5 open reading frame 20            |
| 0,972654947 | 0,889   | 0,846158597 | 0,04231 | C5orf22  | chromosome 5 open reading frame 22            |
| 0,840896415 | 0,56325 | 0,716977624 | 0,00925 | C5orf24  | chromosome 5 open reading frame 24            |
| 0,964598185 | 0,85126 | 0,708087719 | 0,00491 | C5orf28  | chromosome 5 open reading frame 28            |
| 0,868742185 | 0,68939 | 0,61985385  | 0,00056 | C5orf28  | chromosome 5 open reading frame 28            |
| 0,781869643 | 0,13675 | 0,750539549 | 0,00052 | C5orf30  | chromosome 5 open reading frame 30            |
| 0,868140228 | 0,52104 | 0,626332219 | 0,00034 | C5orf35  | chromosome 5 open reading frame 35            |
| 0,813943185 | 0,1029  | 0,717972255 | 0,00033 | C5orf43  | chromosome 5 open reading frame 43            |
| 0,81056512  | 0,39055 | 0,676424116 | 0,00522 | C5orf44  | chromosome 5 open reading frame 44            |
| 1,082975046 | 0,77242 | 0,79774524  | 0,00648 | C5orf44  | chromosome 5 open reading frame 44            |
| 0,936272247 | 0,5968  | 1,205807828 | 0,00055 | C5orf45  | chromosome 5 open reading frame 45            |
| 0,833931044 | 0,37481 | 0,802737389 | 0,01211 | C5orf51  | chromosome 5 open reading frame 51            |
| 0,788400174 | 0,22253 | 0,867538687 | 0,02568 | C5orf53  | chromosome 5 open reading frame 53            |
| 1,085229372 | 0,20786 | 1,134455485 | 0,00661 | C6orf10  | chromosome 6 open reading frame 10            |
| 1,098092814 | 0,34373 | 1,147107024 | 0,01797 | C6orf105 | chromosome 6 open reading frame 105           |
| 1,125838586 | 0,2441  | 1,285206337 | 0,00551 | C6orf108 | chromosome 6 open reading frame 108           |
| 1,032398535 | 0,70858 | 1,132883885 | 0,0018  | C6orf112 | chromosome 6 open reading frame 112           |
| 0,919550046 | 0,6745  | 0,831045862 | 0,03819 | C6orf120 | chromosome 6 open reading frame 120           |
| 0,744838732 | 0,06757 | 0,693034943 | 0,00122 | C6orf120 | chromosome 6 open reading frame 120           |
| 1,044635763 | 0,56981 | 1,170398641 | 0,02116 | C6orf123 | chromosome 6 open reading frame 123           |

|             |         |             |         |          |                                                              |
|-------------|---------|-------------|---------|----------|--------------------------------------------------------------|
| 1,010451446 | 0,88982 | 1,109569472 | 0,03675 | C6orf125 | chromosome 6 open reading frame 125                          |
| 0,887611337 | 0,24373 | 0,809442217 | 0,02747 | C6orf130 | chromosome 6 open reading frame 130                          |
| 0,750539549 | 0,41232 | 0,681601304 | 0,00031 | C6orf132 | chromosome 6 open reading frame 132                          |
| 0,917639882 | 0,50412 | 1,138394029 | 0,03081 | C6orf145 | chromosome 6 open reading frame 145                          |
| 0,85027416  | 0,10085 | 0,885153765 | 0,00447 | C6orf163 | chromosome 6 open reading frame 163                          |
| 0,866937564 | 0,15617 | 0,827023368 | 0,00694 | C6orf168 | chromosome 6 open reading frame 168                          |
| 1,065846736 | 0,79871 | 0,724471077 | 0,00476 | C6orf170 | chromosome 6 open reading frame 170                          |
| 1,130530567 | 0,26686 | 1,247465572 | 0,00043 | C6orf174 | chromosome 6 open reading frame 174                          |
| 0,876605721 | 0,4425  | 0,892546971 | 0,04621 | C6orf192 | chromosome 6 open reading frame 192                          |
| 1,050444544 | 0,47188 | 1,196648963 | 0,01297 | C6orf221 | chromosome 6 open reading frame 221                          |
| 1,074004472 | 0,47397 | 1,220946513 | 0,00064 | C6orf223 | chromosome 6 open reading frame 223                          |
| 1,167967395 | 0,29178 | 1,22603486  | 0,00364 | C6orf225 | chromosome 6 open reading frame 225                          |
| 1,00486382  | 0,97048 | 0,823591017 | 0,02105 | C6orf35  | chromosome 6 open reading frame 35                           |
| 0,939522749 | 0,67436 | 1,138394029 | 0,0347  | C6orf48  | chromosome 6 open reading frame 48                           |
| 1,049716684 | 0,55417 | 1,098854218 | 0,04634 | C6orf52  | chromosome 6 open reading frame 52                           |
| 1,113421618 | 0,55766 | 0,838568184 | 0,03807 | C6orf57  | chromosome 6 open reading frame 57                           |
| 1,014662547 | 0,85116 | 1,133669413 | 0,02468 | C6orf58  | chromosome 6 open reading frame 58                           |
| 0,969289817 | 0,87835 | 0,883315051 | 0,04222 | C6orf62  | chromosome 6 open reading frame 62                           |
| 0,753667455 | 0,16206 | 0,782954296 | 0,00109 | C6orf72  | chromosome 6 open reading frame 72                           |
| 0,840313752 | 0,2203  | 0,748980467 | 0,00019 | C6orf89  | chromosome 6 open reading frame 89                           |
| 0,971307496 | 0,83719 | 1,133669413 | 0,01768 | C6orf89  | chromosome 6 open reading frame 89                           |
| 0,893785162 | 0,32773 | 0,793333843 | 0,00043 | C7orf11  | chromosome 7 open reading frame 11                           |
| 1,184271612 | 0,10776 | 1,131314463 | 0,03557 | C7orf26  | chromosome 7 open reading frame 26                           |
| 0,773246337 | 0,23177 | 0,829319546 | 0,03025 | C7orf28B | chromosome 7 open reading frame 28B                          |
| 0,852634892 | 0,16307 | 0,770037174 | 0,00003 | C7orf30  | chromosome 7 open reading frame 30                           |
| 0,814507563 | 0,06327 | 0,824733549 | 0,00139 | C7orf30  | chromosome 7 open reading frame 30                           |
| 0,773246337 | 0,10173 | 0,71449707  | 0,0008  | C7orf36  | chromosome 7 open reading frame 36                           |
| 1,153485605 | 0,21622 | 1,114966219 | 0,03306 | C7orf44  | chromosome 7 open reading frame 44                           |
| 0,988970916 | 0,89623 | 1,106497353 | 0,01919 | C7orf49  | chromosome 7 open reading frame 49                           |
| 1,046810282 | 0,61432 | 1,163120042 | 0,02544 | C7orf52  | chromosome 7 open reading frame 52                           |
| 0,84264683  | 0,21263 | 0,891310496 | 0,03226 | C7orf55  | chromosome 7 open reading frame 55                           |
| 0,746389192 | 0,25824 | 0,671751713 | 0,00109 | C7orf57  | chromosome 7 open reading frame 57                           |
| 0,908148418 | 0,66536 | 0,821310701 | 0,0237  | C7orf60  | chromosome 7 open reading frame 60                           |
| 0,808320869 | 0,23576 | 0,848507902 | 0,04916 | C7orf64  | chromosome 7 open reading frame 64                           |
| 0,790041312 | 0,12806 | 0,825877665 | 0,00142 | C7orf70  | chromosome 7 open reading frame 70                           |
| 0,87417862  | 0,35675 | 0,676424116 | 0,00044 | C7orf73  | chromosome 7 open reading frame 73                           |
| 0,735093668 | 0,10631 | 0,735603373 | 0,00006 | C7orf73  | chromosome 7 open reading frame 73                           |
| 1,705269784 | 0,05362 | 1,304050735 | 0,04495 | C7orf74  | chromosome 7 open reading frame 74                           |
| 1,068065408 | 0,46497 | 1,109569472 | 0,03343 | C7orf74  | chromosome 7 open reading frame 74                           |
| 1,198390921 | 0,05772 | 1,129747215 | 0,01232 | C8orf22  | chromosome 8 open reading frame 22                           |
| 1,073260286 | 0,25891 | 1,219255094 | 0,01035 | C8orf31  | chromosome 8 open reading frame 31                           |
| 0,991716731 | 0,9405  | 0,85797053  | 0,01289 | C8orf33  | chromosome 8 open reading frame 33                           |
| 0,890692901 | 0,26569 | 0,865136691 | 0,03635 | C8orf37  | chromosome 8 open reading frame 37                           |
| 0,883315051 | 0,43384 | 0,687294348 | 0,00213 | C8orf38  | chromosome 8 open reading frame 38                           |
| 0,994470169 | 0,96728 | 1,101905116 | 0,04845 | C8orf39  | chromosome 8 open reading frame 39                           |
| 1,016070143 | 0,87228 | 1,148698355 | 0,02597 | C8orf42  | chromosome 8 open reading frame 42                           |
| 0,975355462 | 0,76295 | 0,8962667   | 0,02098 | C8orf47  | chromosome 8 open reading frame 47                           |
| 1,180992661 | 0,20511 | 1,167158102 | 0,02239 | C8orf51  | chromosome 8 open reading frame 51                           |
| 0,959264119 | 0,74958 | 0,775393206 | 0,00262 | C8orf59  | chromosome 8 open reading frame 59                           |
| 0,85027416  | 0,09381 | 0,758909626 | 0,00069 | C8orf59  | chromosome 8 open reading frame 59                           |
| 0,84323111  | 0,07232 | 0,815637493 | 0,0001  | C8orf59  | chromosome 8 open reading frame 59                           |
| 1,38991822  | 0,05896 | 1,31494276  | 0,00008 | C8orf60  | chromosome 8 open reading frame 60                           |
| 1,070288698 | 0,39788 | 1,188383105 | 0,01258 | C8orf83  | chromosome 8 open reading frame 83                           |
| 0,77271055  | 0,19706 | 0,824162085 | 0,01819 | C8orf83  | chromosome 8 open reading frame 83                           |
| 1,073260286 | 0,35197 | 1,113421618 | 0,0387  | C9orf100 | chromosome 9 open reading frame 100                          |
| 0,837987135 | 0,07081 | 0,720464874 | 0,00131 | C9orf102 | chromosome 9 open reading frame 102                          |
| 0,976708529 | 0,7561  | 1,095811766 | 0,03985 | C9orf11  | chromosome 9 open reading frame 11                           |
| 1,175276328 | 0,07797 | 1,170398641 | 0,00333 | C9orf116 | chromosome 9 open reading frame 116                          |
| 1,275444392 | 0,08344 | 1,22858698  | 0,00152 | C9orf117 | chromosome 9 open reading frame 117                          |
| 1,036701101 | 0,75154 | 1,148698355 | 0,01856 | C9orf117 | chromosome 9 open reading frame 117                          |
| 1,155085785 | 0,29047 | 1,172834949 | 0,01392 | C9orf117 | chromosome 9 open reading frame 117                          |
| 1,058484395 | 0,5241  | 0,905633983 | 0,04923 | C9orf135 | chromosome 9 open reading frame 135                          |
| 0,972654947 | 0,82153 | 0,867538687 | 0,00843 | C9orf156 | chromosome 9 open reading frame 156                          |
| 0,860352631 | 0,117   | 0,832198735 | 0,00137 | C9orf156 | chromosome 9 open reading frame 156                          |
| 1,163120042 | 0,1456  | 1,190856849 | 0,01605 | C9orf167 | chromosome 9 open reading frame 167                          |
| 0,912565489 | 0,37313 | 0,880259014 | 0,04681 | C9orf30  | chromosome 9 open reading frame 30                           |
| 0,915099168 | 0,53668 | 0,852044095 | 0,01519 | C9orf30  | chromosome 9 open reading frame 30                           |
| 1,037419937 | 0,71462 | 1,113421618 | 0,03289 | C9orf31  | chromosome 9 open reading frame 31                           |
| 0,982820599 | 0,90051 | 1,281647924 | 0,00128 | C9orf37  | chromosome 9 open reading frame 37                           |
| 0,797192477 | 0,30759 | 0,747424624 | 0,00021 | C9orf41  | chromosome 9 open reading frame 41                           |
| 0,780786493 | 0,05777 | 0,772175133 | 0,00005 | C9orf46  | chromosome 9 open reading frame 46                           |
| 0,882702996 | 0,47575 | 0,898755127 | 0,03209 | C9orf5   | chromosome 9 open reading frame 5                            |
| 1,04608494  | 0,66417 | 1,178539408 | 0,00105 | C9orf53  | chromosome 9 open reading frame 53                           |
| 1,180992661 | 0,09673 | 1,203303026 | 0,02007 | C9orf7   | chromosome 9 open reading frame 7                            |
| 1,071030823 | 0,4459  | 1,20664392  | 0,00108 | C9orf7   | chromosome 9 open reading frame 7                            |
| 1,031683179 | 0,6708  | 1,124278924 | 0,04469 | C9orf71  | chromosome 9 open reading frame 71                           |
| 0,911933166 | 0,68064 | 0,796088099 | 0,04209 | C9orf72  | chromosome 9 open reading frame 72                           |
| 0,737645729 | 0,15235 | 0,76950361  | 0,00016 | C9orf78  | chromosome 9 open reading frame 78                           |
| 0,832775771 | 0,23723 | 0,820741609 | 0,01367 | C9orf80  | chromosome 9 open reading frame 80                           |
| 0,963261894 | 0,83252 | 0,827596816 | 0,00738 | C9orf82  | chromosome 9 open reading frame 82                           |
| 0,918912883 | 0,70764 | 0,757858283 | 0,00132 | C9orf82  | chromosome 9 open reading frame 82                           |
| 0,898755127 | 0,27599 | 0,879039561 | 0,02261 | C9orf85  | chromosome 9 open reading frame 85                           |
| 0,930449658 | 0,41352 | 1,184271612 | 0,02523 | C9orf86  | chromosome 9 open reading frame 86                           |
| 1,110338834 | 0,29414 | 1,16634937  | 0,04451 | C9orf96  | chromosome 9 open reading frame 96                           |
| 1,071773463 | 0,42842 | 1,110338834 | 0,03501 | C9orf96  | chromosome 9 open reading frame 96                           |
| 1,073260286 | 0,49515 | 1,139183377 | 0,0166  | CA1      | carbonic anhydrase I                                         |
| 0,646176415 | 0,13007 | 0,632878297 | 0,00015 | CA13     | carbonic anhydrase XIII                                      |
| 1,078480432 | 0,4569  | 1,17772279  | 0,04253 | CA14     | carbonic anhydrase XIV                                       |
| 1,125058485 | 0,20233 | 1,223488804 | 0,01646 | CA5A     | carbonic anhydrase VA, mitochondrial                         |
| 1,069547088 | 0,33701 | 1,189207115 | 0,00566 | CA5B     | carbonic anhydrase VB, mitochondrial                         |
| 1,181811547 | 0,05824 | 1,121943481 | 0,02208 | CA6      | carbonic anhydrase VI                                        |
| 1,064370182 | 0,53902 | 1,132098902 | 0,03712 | CA7      | carbonic anhydrase VII                                       |
| 1,082224645 | 0,2659  | 1,147902414 | 0,01759 | CA8      | carbonic anhydrase VIII                                      |
| 0,944747041 | 0,65718 | 0,895025071 | 0,04089 | CAB39L   | calcium binding protein 39-like                              |
| 0,793883931 | 0,29269 | 0,688725023 | 0,02643 | CAB39L   | calcium binding protein 39-like                              |
| 1,301341855 | 0,05438 | 1,263127262 | 0,0002  | CACNA1C  | calcium channel, voltage-dependent, L type, alpha 1C subunit |
| 1,161508732 | 0,21321 | 1,21335356  | 0,00566 | CACNA1C  | calcium channel, voltage-dependent, L type, alpha 1C subunit |
| 1,193335743 | 0,06217 | 1,114966219 | 0,00766 | CACNA1D  | calcium channel, voltage-dependent, L type, alpha 1D subunit |
| 0,920825697 | 0,34935 | 0,891928519 | 0,01087 | CACNA1D  | calcium channel, voltage-dependent, L type, alpha 1D subunit |
| 1,154285418 | 0,29781 | 1,219255094 | 0,00055 | CACNA1H  | calcium channel, voltage-dependent, T type, alpha 1H subunit |
| 0,938871747 | 0,69616 | 1,148698355 | 0,0302  | CACNA1I  | calcium channel, voltage-dependent, T type, alpha 1I subunit |
| 1,038859103 | 0,58982 | 1,122721422 | 0,01787 | CACNA2D1 | calcium channel, voltage-dependent, alpha 2/delta subunit 1  |
| 0,880259014 | 0,66046 | 0,807760778 | 0,03305 | CACNA2D1 | calcium channel, voltage-dependent, alpha 2/delta subunit 1  |
| 0,998614666 | 0,98982 | 0,802737389 | 0,01009 | CACNB4   | calcium channel, voltage-dependent, beta 4 subunit           |

|             |         |             |         |          |                                                                     |
|-------------|---------|-------------|---------|----------|---------------------------------------------------------------------|
| 1,082224645 | 0,29182 | 1,168777249 | 0,02187 | CACNG1   | calcium channel, voltage-dependent, gamma subunit 1                 |
| 1,198309021 | 0,14702 | 1,305859787 | 0,00009 | CACNG4   | calcium channel, voltage-dependent, gamma subunit 4                 |
| 1,244874235 | 0,07852 | 1,310393404 | 0,00057 | CACNG6   | calcium channel, voltage-dependent, gamma subunit 6                 |
| 0,991029563 | 0,94034 | 1,185092771 | 0,01397 | CACNG8   | calcium channel, voltage-dependent, gamma subunit 8                 |
| 0,887611337 | 0,19497 | 0,825305409 | 0,0005  | CACYBP   | calcyclin binding protein                                           |
| 0,883927531 | 0,50164 | 0,774855931 | 0,00013 | CACYBP   | calcyclin binding protein                                           |
| 1,043188594 | 0,56196 | 1,116512962 | 0,01774 | CADM1    | cell adhesion molecule 1                                            |
| 1,331451613 | 0,2604  | 1,559409685 | 0,00845 | CADM1    | cell adhesion molecule 1                                            |
| 1,214194884 | 0,07329 | 1,156688184 | 0,0296  | CADM1    | cell adhesion molecule 1                                            |
| 1,145517898 | 0,19573 | 1,227735684 | 0,00464 | CALCA    | calcitonin-related polypeptide alpha                                |
| 1,132883885 | 0,21164 | 1,153485605 | 0,01449 | CALCOCO2 | calcium binding and coiled-coil domain 2                            |
| 0,999307093 | 0,9972  | 0,901250463 | 0,02372 | CALCOCO2 | calcium binding and coiled-coil domain 2                            |
| 1,076986376 | 0,38615 | 1,143930973 | 0,0163  | CALCOCO2 | calcium binding and coiled-coil domain 2                            |
| 0,986232704 | 0,87761 | 1,118061851 | 0,01427 | CALCR    | calcitonin receptor                                                 |
| 0,582770599 | 0,07049 | 0,662503509 | 0,00423 | CALM1    | calmodulin 1 (phosphorylase kinase, delta)                          |
| 1,0132569   | 0,90571 | 0,883315051 | 0,00459 | CALML4   | calmodulin-like 4                                                   |
| 0,852044095 | 0,14845 | 0,848507902 | 0,02571 | CALML4   | calmodulin-like 4                                                   |
| 1,050444544 | 0,61756 | 0,803850991 | 0,00267 | CALML4   | calmodulin-like 4                                                   |
| 1,10343374  | 0,32013 | 1,200803427 | 0,01729 | CALN1    | calneuron 1                                                         |
| 1,240567298 | 0,19572 | 1,320422841 | 0,00305 | CALU     | calumenin                                                           |
| 1,214194884 | 0,10933 | 1,319507911 | 0,0121  | CALU     | calumenin                                                           |
| 1,130530567 | 0,32508 | 1,215879283 | 0,00728 | CAMK1    | calcium/calmodulin-dependent protein kinase I                       |
| 1,167967395 | 0,13237 | 1,169587664 | 0,0447  | CAMK1    | calcium/calmodulin-dependent protein kinase I                       |
| 1,104964485 | 0,30695 | 1,21335356  | 0,02245 | CAMK1G   | calcium/calmodulin-dependent protein kinase IG                      |
| 1,080725402 | 0,38921 | 1,191682575 | 0,00274 | CAMK1G   | calcium/calmodulin-dependent protein kinase IG                      |
| 1,285206337 | 0,07082 | 1,304954948 | 0,0011  | CAMK2B   | calcium/calmodulin-dependent protein kinase II beta                 |
| 0,948026965 | 0,50654 | 1,122721422 | 0,01282 | CAMK2B   | calcium/calmodulin-dependent protein kinase II beta                 |
| 0,76154437  | 0,19217 | 0,724471077 | 0,01424 | CAMK2D   | calcium/calmodulin-dependent protein kinase II delta                |
| 0,745355193 | 0,182   | 0,833931044 | 0,00455 | CAMK2D   | calcium/calmodulin-dependent protein kinase II delta                |
| 0,852044095 | 0,39858 | 0,76684133  | 0,00234 | CAMK2D   | calcium/calmodulin-dependent protein kinase II delta                |
| 1,012554807 | 0,93667 | 0,854409741 | 0,04437 | CAMK2D   | calcium/calmodulin-dependent protein kinase II delta                |
| 0,618566239 | 0,14741 | 0,643048742 | 0,00113 | CAMK2D   | calcium/calmodulin-dependent protein kinase II delta                |
| 0,93109482  | 0,73315 | 1,204972315 | 0,00921 | CAMK2G   | calcium/calmodulin-dependent protein kinase II gamma                |
| 0,995849753 | 0,97521 | 0,90062598  | 0,04527 | CAMK2N1  | calcium/calmodulin-dependent protein kinase II inhibitor 1          |
| 0,968618189 | 0,68114 | 1,104198847 | 0,02683 | CAMK2N2  | calcium/calmodulin-dependent protein kinase II inhibitor 2          |
| 1,009051634 | 0,91148 | 1,193335743 | 0,01228 | CAMKV    | CaM kinase-like vesicle-associated                                  |
| 0,833931044 | 0,16281 | 0,835666959 | 0,02191 | CAMLG    | calcium modulating ligand                                           |
| 0,749499801 | 0,10165 | 0,735093668 | 0,00054 | CAMSAP1  | calmodulin regulated spectrin-associated protein 1                  |
| 0,796640096 | 0,159   | 0,731028724 | 0,00028 | CAMSAP1  | calmodulin regulated spectrin-associated protein 1                  |
| 0,76154437  | 0,26155 | 0,763129604 | 0,00059 | CAMSAP2  | calmodulin regulated spectrin-associated protein family, member 2   |
| 0,76684133  | 0,08543 | 0,822450069 | 0,005   | CAND1    | cullin-associated and neddylation-dissociated 1                     |
| 0,693034943 | 0,07565 | 0,768437591 | 0,00087 | CAND1    | cullin-associated and neddylation-dissociated 1                     |
| 1,198309021 | 0,20943 | 1,208317843 | 0,01404 | CANT1    | calcium activated nucleotidase 1                                    |
| 0,976708529 | 0,91692 | 0,770037174 | 0,0075  | CAP2     | CAP, adenylate cyclase-associated protein, 2 (yeast)                |
| 1,060687741 | 0,5686  | 1,237132479 | 0,0052  | CAPN12   | calpain 12                                                          |
| 1,28877463  | 0,06404 | 1,134455485 | 0,01709 | CAPN13   | calpain 13                                                          |
| 0,745872013 | 0,0833  | 0,877213549 | 0,0117  | CAPN2    | calpain 2, (m/II) large subunit                                     |
| 0,762072415 | 0,07112 | 0,755759964 | 0,00422 | CAPN2    | calpain 2, (m/II) large subunit                                     |
| 1,032398535 | 0,72153 | 0,837406488 | 0,0236  | CAPN6    | calpain 6                                                           |
| 0,957271458 | 0,47911 | 1,101141598 | 0,03174 | CAPN6    | calpain 6                                                           |
| 0,734584317 | 0,13442 | 0,802737389 | 0,00449 | CAPN7    | calpain 7                                                           |
| 1,021720083 | 0,78112 | 1,159899655 | 0,00081 | CAPN9    | calpain 9                                                           |
| 1,0238469   | 0,80859 | 1,210833084 | 0,01501 | CAPS     | calcyphosine                                                        |
| 0,87539133  | 0,45257 | 0,853226098 | 0,00097 | CAPZA1   | capping protein (actin filament) muscle Z-line, alpha 1             |
| 0,856781955 | 0,05033 | 0,823591017 | 0,02401 | CAPZA2   | capping protein (actin filament) muscle Z-line, alpha 2             |
| 1,275444392 | 0,05375 | 1,220946513 | 0,00158 | CARD11   | caspace recruitment domain family, member 11                        |
| 0,965936329 | 0,65609 | 0,823591017 | 0,00375 | CARD14   | caspace recruitment domain family, member 14                        |
| 0,853817714 | 0,26927 | 0,833353207 | 0,04559 | CARD14   | caspace recruitment domain family, member 14                        |
| 1,107264584 | 0,61504 | 1,411275843 | 0,00405 | CARD16   | caspace recruitment domain family, member 16                        |
| 0,816768991 | 0,29239 | 0,76154437  | 0,00011 | CARD6    | caspace recruitment domain family, member 6                         |
| 1,172022284 | 0,16822 | 1,272794935 | 0,00115 | CARHSP1  | calcium regulated heat stable protein 1, 24kDa                      |
| 0,811689581 | 0,1211  | 0,868742185 | 0,04047 | CARHSP1  | calcium regulated heat stable protein 1, 24kDa                      |
| 0,820172911 | 0,15031 | 0,85086373  | 0,00322 | CARKD    | carbohydrate kinase domain containing                               |
| 1,241427492 | 0,07799 | 1,443929196 | 0,00018 | CARNS1   | carnosine synthase 1                                                |
| 0,966606097 | 0,77665 | 0,865736566 | 0,01563 | CARS2    | cysteinyI-tRNA synthetase 2, mitochondrial (putative)               |
| 1,054822317 | 0,36958 | 1,101905116 | 0,03053 | CARTPT   | CART prepropeptide                                                  |
| 0,852634892 | 0,29425 | 0,920187651 | 0,03238 | CASK     | calcium/calmodulin-dependent serine protein kinase (MAGUK family)   |
| 1,172834949 | 0,14705 | 1,377450046 | 0,0022  | CASP10   | caspace 10, apoptosis-related cysteine peptidase                    |
| 1,197478705 | 0,05029 | 1,199139914 | 0,00589 | CASP10   | caspace 10, apoptosis-related cysteine peptidase                    |
| 0,964598185 | 0,6231  | 1,167158102 | 0,01194 | CASP14   | caspace 14, apoptosis-related cysteine peptidase                    |
| 1,199139914 | 0,09911 | 1,194163187 | 0,00068 | CASP3    | caspace 3, apoptosis-related cysteine peptidase                     |
| 0,621574834 | 0,0582  | 0,770571108 | 0,00519 | CASP6    | caspace 6, apoptosis-related cysteine peptidase                     |
| 1,135242102 | 0,15342 | 1,132883885 | 0,00587 | CASQ1    | calsequestrin 1 (fast-twitch, skeletal muscle)                      |
| 0,986916546 | 0,89755 | 1,164733586 | 0,0102  | CASQ2    | calsequestrin 2 (cardiac muscle)                                    |
| 1,133669413 | 0,2518  | 1,306765254 | 0,00014 | CASR     | calcium-sensing receptor                                            |
| 1,183451022 | 0,06828 | 1,153485605 | 0,00384 | CASS4    | Cas scaffolding protein family member 4                             |
| 1,019597683 | 0,8417  | 1,172022284 | 0,00228 | CASS4    | Cas scaffolding protein family member 4                             |
| 0,744838732 | 0,08858 | 0,801625329 | 0,02323 | CASZ1    | castor zinc finger 1                                                |
| 1,132098902 | 0,28343 | 1,113421618 | 0,01389 | CATSPER1 | cation channel, sperm associated 1                                  |
| 0,978063473 | 0,78355 | 1,095052471 | 0,04742 | CATSPER3 | cation channel, sperm associated 3                                  |
| 0,972654947 | 0,74057 | 1,123499903 | 0,02409 | CATSPER3 | cation channel, sperm-associated, gamma                             |
| 1,054091423 | 0,67215 | 1,087488391 | 0,04025 | CATX-1   | hypothetical LOC10050613                                            |
| 0,798851916 | 0,13922 | 0,763129604 | 0,00416 | CAV2     | caveolin 2                                                          |
| 1,082975046 | 0,63147 | 0,833353207 | 0,00931 | CBL      | Cas-Br-M (murine) ecotropic retroviral transforming sequence        |
| 1,01395948  | 0,88696 | 1,112650121 | 0,03274 | CBL      | Cas-Br-M (murine) ecotropic retroviral transforming sequence        |
| 0,995849753 | 0,97866 | 0,758383773 | 0,00021 | CBLL1    | Cas-Br-M (murine) ecotropic retroviral transforming sequence-like 1 |
| 1,355664327 | 0,06825 | 1,310393404 | 0,00208 | CBLN2    | cerebellin 2 precursor                                              |
| 0,821310701 | 0,33882 | 0,782411782 | 0,02093 | CBR4     | carbonyl reductase 4                                                |
| 0,750019495 | 0,17489 | 0,755236293 | 0,00365 | CBR4     | carbonyl reductase 4                                                |
| 0,842062954 | 0,13288 | 0,855595026 | 0,01106 | CBR4     | carbonyl reductase 4                                                |
| 1,128964405 | 0,24524 | 1,254402205 | 0,00727 | CBS      | cystathionine-beta-synthase                                         |
| 0,925304428 | 0,63724 | 0,813943185 | 0,04476 | CBX3     | chromobox homolog 3                                                 |
| 0,869947353 | 0,47995 | 0,878430468 | 0,04724 | CBX3     | chromobox homolog 3                                                 |
| 0,76154437  | 0,09188 | 0,868140228 | 0,02486 | CBX3     | chromobox homolog 3                                                 |
| 0,985549337 | 0,96937 | 0,712518807 | 0,01538 | CBX5     | chromobox homolog 5                                                 |
| 0,659753955 | 0,11726 | 0,701249625 | 0,00918 | CBX5     | chromobox homolog 5                                                 |
| 1,101905116 | 0,23944 | 1,148698355 | 0,00817 | CBX5     | chromobox homolog 5                                                 |
| 1,160703914 | 0,25819 | 1,209155676 | 0,02035 | CBX6     | chromobox homolog 6                                                 |
| 1,17609125  | 0,09062 | 1,162314108 | 0,02053 | CBX8     | chromobox homolog 8                                                 |
| 0,827596816 | 0,17905 | 0,898132373 | 0,04284 | CC2D2B   | coiled-coil and C2 domain containing 2B                             |
| 1,217566019 | 0,11884 | 1,187559666 | 0,04054 | CC2D2B   | coiled-coil and C2 domain containing 2B                             |
| 0,755236293 | 0,26361 | 0,779704843 | 0,00047 | CCAR1    | cell division cycle and apoptosis regulator 1                       |
| 0,885767519 | 0,51109 | 0,855002178 | 0,03014 | CCAR1    | cell division cycle and apoptosis regulator 1                       |
| 0,622437118 | 0,06035 | 0,697371833 | 0,00217 | CCAR1    | cell division cycle and apoptosis regulator 1                       |

|             |         |             |         |          |                                                              |
|-------------|---------|-------------|---------|----------|--------------------------------------------------------------|
| 0,87539133  | 0,30837 | 0,788946841 | 0,00088 | CCBL2    | cysteine conjugate-beta lyase 2                              |
| 0,955945318 | 0,67749 | 1,111879158 | 0,02589 | CCBP2    | chemokine binding protein 2                                  |
| 1,125838586 | 0,16541 | 1,163120042 | 0,00646 | CCDC103  | coiled-coil domain containing 103                            |
| 0,829894586 | 0,26723 | 0,787307977 | 0,00001 | CCDC104  | coiled-coil domain containing 104                            |
| 1,132883885 | 0,17237 | 1,209155676 | 0,00181 | CCDC108  | coiled-coil domain containing 108                            |
| 0,905006463 | 0,24763 | 0,832775771 | 0,00888 | CCDC109B | coiled-coil domain containing 109B                           |
| 0,862143545 | 0,13981 | 0,734584317 | 0,00004 | CCDC113  | coiled-coil domain containing 113                            |
| 1,029540083 | 0,659   | 1,132883885 | 0,02909 | CCDC124  | coiled-coil domain containing 124                            |
| 1,093535457 | 0,32452 | 0,87539133  | 0,01018 | CCDC125  | coiled-coil domain containing 125                            |
| 1,160703914 | 0,12773 | 1,107264584 | 0,03201 | CCDC127  | coiled-coil domain containing 127                            |
| 1,064370182 | 0,56132 | 1,156688184 | 0,03667 | CCDC129  | coiled-coil domain containing 129                            |
| 1,145517898 | 0,18997 | 1,169587664 | 0,00887 | CCDC13   | coiled-coil domain containing 13                             |
| 0,997231251 | 0,9855  | 1,139183377 | 0,02691 | CCDC13   | coiled-coil domain containing 13                             |
| 1,033114388 | 0,74851 | 1,132098902 | 0,03341 | CCDC130  | coiled-coil domain containing 130                            |
| 0,918276162 | 0,46276 | 0,743291492 | 0,00017 | CCDC138  | coiled-coil domain containing 138                            |
| 1,160703914 | 0,51999 | 1,184271612 | 0,03092 | CCDC14   | coiled-coil domain containing 14                             |
| 1,087488391 | 0,41164 | 1,175276328 | 0,03117 | CCDC144C | coiled-coil domain containing 144C                           |
| 1,030253954 | 0,75047 | 1,139183377 | 0,02475 | CCDC149  | coiled-coil domain containing 149                            |
| 1,149494848 | 0,29282 | 1,257884972 | 0,00321 | CCDC149  | coiled-coil domain containing 149                            |
| 1,020304659 | 0,86594 | 1,202469249 | 0,00168 | CCDC151  | coiled-coil domain containing 151                            |
| 1,184271612 | 0,14035 | 1,142346247 | 0,02423 | CCDC157  | coiled-coil domain containing 157                            |
| 1,030968319 | 0,80469 | 1,20163605  | 0,01247 | CCDC159  | coiled-coil domain containing 159                            |
| 0,963929808 | 0,68194 | 0,86934456  | 0,01572 | CCDC169  | coiled-coil domain containing 169                            |
| 0,797192477 | 0,14766 | 0,802737389 | 0,01408 | CCDC22   | coiled-coil domain containing 22                             |
| 1,098854218 | 0,45802 | 1,135242102 | 0,02615 | CCDC24   | coiled-coil domain containing 24                             |
| 0,788946841 | 0,09445 | 0,811689581 | 0,00061 | CCDC25   | coiled-coil domain containing 25                             |
| 1,042465761 | 0,75162 | 1,158292806 | 0,01868 | CCDC33   | coiled-coil domain containing 33                             |
| 1,181811547 | 0,09602 | 1,162314108 | 0,01328 | CCDC33   | coiled-coil domain containing 33                             |
| 0,858565436 | 0,43612 | 0,822450069 | 0,02622 | CCDC34   | coiled-coil domain containing 34                             |
| 0,919550046 | 0,33694 | 0,898132373 | 0,0135  | CCDC36   | coiled-coil domain containing 36                             |
| 1,051901779 | 0,61483 | 1,145517898 | 0,02163 | CCDC36   | coiled-coil domain containing 36                             |
| 0,865736566 | 0,52233 | 0,661127303 | 0,00013 | CCDC41   | coiled-coil domain containing 41                             |
| 0,983502074 | 0,88723 | 0,897510051 | 0,04205 | CCDC41   | coiled-coil domain containing 41                             |
| 0,786762445 | 0,16374 | 0,808320869 | 0,00015 | CCDC43   | coiled-coil domain containing 43                             |
| 0,967947027 | 0,81446 | 1,136029265 | 0,01797 | CCDC48   | coiled-coil domain containing 48                             |
| 0,790041312 | 0,14374 | 0,720464874 | 0       | CCDC59   | coiled-coil domain containing 59                             |
| 1,155886707 | 0,20217 | 1,095811766 | 0,01897 | CCDC7    | coiled-coil domain containing 7                              |
| 1,046810282 | 0,71018 | 1,173648178 | 0,01612 | CCDC70   | coiled-coil domain containing 70                             |
| 0,87417862  | 0,46317 | 0,852044095 | 0,00755 | CCDC75   | coiled-coil domain containing 75                             |
| 0,922742493 | 0,78143 | 0,62546454  | 0,00054 | CCDC76   | coiled-coil domain containing 76                             |
| 0,885767519 | 0,36417 | 0,811127156 | 0,00413 | CCDC77   | coiled-coil domain containing 77                             |
| 1,358486285 | 0,17925 | 1,337927555 | 0,01907 | CCDC80   | coiled-coil domain containing 80                             |
| 1,021720083 | 0,83467 | 1,214194884 | 0,03768 | CCDC85A  | coiled-coil domain containing 85A                            |
| 1,097331938 | 0,65863 | 1,350037985 | 0,00072 | CCDC85B  | coiled-coil domain containing 85B                            |
| 1,167967395 | 0,13095 | 1,238848698 | 0,00076 | CCDC87   | coiled-coil domain containing 87                             |
| 1,185092771 | 0,25307 | 1,435944511 | 0,00971 | CCDC88A  | coiled-coil domain containing 88A                            |
| 1,199139914 | 0,16838 | 1,292352831 | 0,00404 | CCDC88B  | coiled-coil domain containing 88B                            |
| 0,911933166 | 0,42263 | 0,903752727 | 0,0309  | CCDC90B  | coiled-coil domain containing 90B                            |
| 0,784584098 | 0,23559 | 0,773782497 | 0,00675 | CCDC91   | coiled-coil domain containing 91                             |
| 0,694477568 | 0,05478 | 0,79774524  | 0,00025 | CCDC93   | coiled-coil domain containing 93                             |
| 0,819604608 | 0,22798 | 0,848507902 | 0,00714 | CCDC93   | coiled-coil domain containing 93                             |
| 0,880259014 | 0,22963 | 1,102669163 | 0,03176 | CCDC97   | coiled-coil domain containing 97                             |
| 1,183451022 | 0,10649 | 1,180992661 | 0,03497 | CCHCR1   | coiled-coil alpha-helical rod protein 1                      |
| 0,933032992 | 0,59872 | 0,891310496 | 0,03176 | CCHCR1   | coiled-coil alpha-helical rod protein 1                      |
| 1,210833084 | 0,08827 | 1,135242102 | 0,03533 | CCL13    | chemokine (C-C motif) ligand 13                              |
| 1,371733289 | 0,33658 | 1,64832417  | 0,01379 | CCL19    | chemokine (C-C motif) ligand 19                              |
| 0,917639882 | 0,64559 | 1,364147835 | 0,00981 | CCL21    | chemokine (C-C motif) ligand 21                              |
| 0,873572896 | 0,38372 | 0,844986384 | 0,00371 | CNNA2    | cyclin A2                                                    |
| 0,726482525 | 0,07323 | 0,866336856 | 0,01364 | CNBN1IP1 | cyclin B1 interacting protein 1, E3 ubiquitin protein ligase |
| 1,136029265 | 0,07362 | 1,111108729 | 0,02224 | CNBN3    | cyclin B3                                                    |
| 1,073260286 | 0,56468 | 0,824162085 | 0,02035 | CNCC     | cyclin C                                                     |
| 0,60583633  | 0,06626 | 0,806082831 | 0,03142 | CNND1    | cyclin D1                                                    |
| 0,921464186 | 0,44426 | 1,160703914 | 0,04195 | CNND3    | cyclin D3                                                    |
| 0,878430468 | 0,63173 | 0,640379931 | 0,00019 | CNNE2    | cyclin E2                                                    |
| 0,846745312 | 0,26702 | 0,831045862 | 0,00435 | CNNH     | cyclin H                                                     |
| 0,855002178 | 0,37091 | 0,7944344   | 0,00318 | CNNJ     | cyclin J                                                     |
| 0,957935218 | 0,70812 | 0,909408252 | 0,02093 | CNNK     | cyclin K                                                     |
| 0,820172911 | 0,3099  | 0,741233505 | 0,0016  | CNNT2    | cyclin T2                                                    |
| 0,891928519 | 0,35529 | 0,811689581 | 0,00663 | CNNY     | cyclin Y                                                     |
| 1,147902414 | 0,13184 | 1,139183377 | 0,00344 | CNNYL2   | cyclin Y-like 2                                              |
| 1,448942155 | 0,05413 | 1,231144413 | 0,01926 | CCPG1    | cell cycle progression 1                                     |
| 1,231998073 | 0,06757 | 1,276328769 | 0,0063  | CCR2     | chemokine (C-C motif) receptor 2                             |
| 1,203303026 | 0,06595 | 1,210833084 | 0,00411 | CCR4     | chemokine (C-C motif) receptor 4                             |
| 0,871154192 | 0,49768 | 0,735093668 | 0,00597 | CCRL1    | chemokine (C-C motif) receptor-like 1                        |
| 0,862741345 | 0,34163 | 0,859756486 | 0,02788 | CCRN4L   | CCR4 carbon catabolite repression 4-like (S. cerevisiae)     |
| 0,599985691 | 0,2915  | 0,718470088 | 0,01085 | CCT2     | chaperonin containing TCP1, subunit 2 (beta)                 |
| 0,909408252 | 0,51592 | 0,819604608 | 0,00256 | CCT5     | chaperonin containing TCP1, subunit 5 (epsilon)              |
| 0,630251696 | 0,07754 | 0,765778999 | 0,00433 | CD109    | CD109 molecule                                               |
| 1,53900722  | 0,14881 | 1,845484985 | 0,00008 | CD14     | CD14 molecule                                                |
| 1,217566019 | 0,11032 | 1,188383105 | 0,01612 | CD163L1  | CD163 molecule-like 1                                        |
| 0,917004043 | 0,52476 | 0,898132373 | 0,01418 | CD164    | CD164 molecule, sialomucin                                   |
| 1,647182035 | 0,10904 | 1,94126894  | 0,00048 | CD177    | CD177 molecule                                               |
| 1,113421618 | 0,27065 | 1,147107024 | 0,03793 | CD18     | CD18 molecule                                                |
| 1,172834949 | 0,06295 | 1,254402205 | 0,00069 | CD22     | CD22 molecule                                                |
| 1,082975046 | 0,37465 | 1,112650121 | 0,03974 | CD226    | CD226 molecule                                               |
| 0,771105413 | 0,10381 | 0,890692901 | 0,04453 | CD24     | CD24 molecule                                                |
| 1,365093718 | 0,08833 | 1,312211255 | 0,00114 | CD248    | CD248 molecule, endosialin                                   |
| 1,025978145 | 0,76525 | 0,87539133  | 0,03807 | CD274    | CD274 molecule                                               |
| 1,056285625 | 0,71447 | 1,289688251 | 0,00333 | CD276    | CD276 molecule                                               |
| 1,156688184 | 0,38225 | 1,218410264 | 0,01104 | CD276    | CD276 molecule                                               |
| 0,718470088 | 0,11523 | 0,79940583  | 0,00553 | CD2AP    | CD2-associated protein                                       |
| 1,279872414 | 0,09966 | 1,237990291 | 0,00289 | CD300A   | CD300a molecule                                              |
| 1,001387256 | 0,99026 | 1,140763716 | 0,01411 | CD300C   | CD300c molecule                                              |
| 1,111879158 | 0,21101 | 1,172022284 | 0,00228 | CD300LB  | CD300 molecule-like family member b                          |
| 1,015366101 | 0,88222 | 1,142346247 | 0,04887 | CD300LB  | CD300 molecule-like family member b                          |
| 1,036701101 | 0,5959  | 1,080725402 | 0,04997 | CD300LG  | CD300 molecule-like family member g                          |
| 1,004167543 | 0,96825 | 1,297738767 | 0,0003  | CD300LG  | CD300 molecule-like family member g                          |
| 1,151887642 | 0,28179 | 1,277213759 | 0,00009 | CD320    | CD320 molecule                                               |
| 1,361314116 | 0,10583 | 1,658639092 | 0,00002 | CD34     | CD34 molecule                                                |
| 1,342572503 | 0,08185 | 1,371733289 | 0,00001 | CD40     | CD40 molecule, TNF receptor superfamily member 5             |
| 1,32408891  | 0,08746 | 1,394743666 | 0,00006 | CD40     | CD40 molecule, TNF receptor superfamily member 5             |
| 0,670821112 | 0,09723 | 0,60667678  | 0,00002 | CD44     | CD44 molecule (Indian blood group)                           |
| 0,579146403 | 0,10217 | 0,838568184 | 0,03747 | CD44     | CD44 molecule (Indian blood group)                           |
| 0,630688704 | 0,1201  | 0,832775771 | 0,02102 | CD44     | CD44 molecule (Indian blood group)                           |

|             |         |             |         |          |                                                                                           |
|-------------|---------|-------------|---------|----------|-------------------------------------------------------------------------------------------|
| 0,595841287 | 0,27118 | 0,590905773 | 0,00049 | CD44     | CD44 molecule (Indian blood group)                                                        |
| 1,20664392  | 0,17349 | 1,169587664 | 0,00616 | CD44     | CD44 molecule (Indian blood group)                                                        |
| 0,879649076 | 0,35042 | 0,804408371 | 0,00034 | CD47     | CD47 molecule                                                                             |
| 0,795536484 | 0,25525 | 0,781869643 | 0,00371 | CD47     | CD47 molecule                                                                             |
| 1,132098902 | 0,24859 | 1,125058485 | 0,01047 | CD5      | CD5 molecule                                                                              |
| 1,450952208 | 0,15172 | 1,489677463 | 0,01621 | CD52     | CD52 molecule                                                                             |
| 0,724973416 | 0,077   | 0,724973416 | 0,00877 | CD55     | CD55 molecule, decay accelerating factor for complement (Cromer blood group)              |
| 0,924022572 | 0,49017 | 0,768437591 | 0,00557 | CD58     | CD58 molecule                                                                             |
| 0,708087719 | 0,09348 | 0,746389192 | 0,03427 | CD58     | CD58 molecule                                                                             |
| 0,863938187 | 0,37795 | 0,798298386 | 0,00967 | CD59     | CD59 molecule, complement regulatory protein                                              |
| 1,29145735  | 0,05289 | 1,377450046 | 0,0002  | CD6      | CD6 molecule                                                                              |
| 0,922103118 | 0,77446 | 1,330529041 | 0       | CD63     | CD63 molecule                                                                             |
| 1,495885758 | 0,07864 | 1,556170353 | 0,00274 | CD74     | CD74 molecule, major histocompatibility complex, class II invariant chain                 |
| 1,17609125  | 0,66449 | 1,612165663 | 0,0002  | CD74     | CD74 molecule, major histocompatibility complex, class II invariant chain                 |
| 0,875998315 | 0,26355 | 0,872967591 | 0,04859 | CD79B    | CD79b molecule, immunoglobulin-associated beta                                            |
| 1,235418637 | 0,06545 | 1,219255094 | 0,00768 | CD80     | CD80 molecule                                                                             |
| 0,875998315 | 0,70577 | 1,242288282 | 0,00857 | CD81     | CD81 molecule                                                                             |
| 1,286097483 | 0,09837 | 1,329607108 | 0,00677 | CD84     | CD84 molecule                                                                             |
| 1,088997015 | 0,41915 | 1,162314108 | 0,00472 | CD84     | CD84 molecule                                                                             |
| 1,130530567 | 0,15565 | 1,271913007 | 0,00081 | CD84     | CD84 molecule                                                                             |
| 1,127400412 | 0,31705 | 1,135242102 | 0,0474  | CD84     | CD84 molecule                                                                             |
| 1,168777249 | 0,22187 | 1,20163605  | 0,03518 | CD84     | CD84 molecule                                                                             |
| 1,064370182 | 0,46226 | 1,170398641 | 0,0231  | CD84     | CD84 molecule                                                                             |
| 1,143138335 | 0,24699 | 1,176906737 | 0,00329 | CD9      | CD9 molecule                                                                              |
| 1,141554707 | 0,4281  | 1,382232207 | 0,00005 | CD99L2   | CD99 molecule-like 2                                                                      |
| 0,870550563 | 0,5138  | 0,688725023 | 0,00021 | CD99P1   | CD99 molecule pseudogene 1                                                                |
| 1,032398535 | 0,82781 | 0,77916458  | 0,00328 | CDADC1   | cytidine and dCMP deaminase domain containing 1                                           |
| 1,051901779 | 0,57842 | 1,143138335 | 0,03013 | CDC14A   | CDC14 cell division cycle 14 homolog A (S. cerevisiae)                                    |
| 0,919550046 | 0,48194 | 1,105730653 | 0,01526 | CDC14A   | CDC14 cell division cycle 14 homolog A (S. cerevisiae)                                    |
| 0,915099168 | 0,66676 | 0,883315051 | 0,03934 | CDC14B   | CDC14 cell division cycle 14 homolog B (S. cerevisiae)                                    |
| 0,791137301 | 0,23597 | 0,648869383 | 0,00016 | CDC14B   | CDC14 cell division cycle 14 homolog B (S. cerevisiae)                                    |
| 1,134455485 | 0,23213 | 1,132098902 | 0,01477 | CDC14B   | CDC14 cell division cycle 14 homolog B (S. cerevisiae)                                    |
| 0,743806881 | 0,24817 | 0,873572896 | 0,02865 | CDC16    | cell division cycle 16 homolog (S. cerevisiae)                                            |
| 0,771105413 | 0,07395 | 0,870550563 | 0,01825 | CDC16    | cell division cycle 16 homolog (S. cerevisiae)                                            |
| 0,805524291 | 0,37096 | 0,754190038 | 0,00032 | CDC23    | cell division cycle 23 homolog (S. cerevisiae)                                            |
| 1,072516617 | 0,48304 | 0,819036698 | 0,00584 | CDC25A   | cell division cycle 25 homolog A (S. pombe)                                               |
| 1,106497353 | 0,33956 | 1,246601194 | 0,00115 | CDC25C   | cell division cycle 25 homolog C (S. pombe)                                               |
| 0,888842681 | 0,13375 | 0,917639882 | 0,04964 | CDC26    | cell division cycle 26 homolog (S. cerevisiae)                                            |
| 0,998614666 | 0,99402 | 0,890692901 | 0,02874 | CDC27    | cell division cycle 27 homolog (S. cerevisiae)                                            |
| 0,827023368 | 0,2275  | 0,817902059 | 0,03617 | CDC37L1  | cell division cycle 37 homolog (S. cerevisiae)-like 1                                     |
| 0,891928519 | 0,4693  | 0,825305409 | 0,02393 | CDC37L1  | cell division cycle 37 homolog (S. cerevisiae)-like 1                                     |
| 1,006257823 | 0,96859 | 0,872362706 | 0,02382 | CDC37L1  | cell division cycle 37 homolog (S. cerevisiae)-like 1                                     |
| 0,771105413 | 0,06722 | 0,839149637 | 0,00765 | CDC40    | cell division cycle 40 homolog (S. cerevisiae)                                            |
| 0,893165852 | 0,48706 | 0,753667455 | 0,03095 | CDC40    | cell division cycle 40 homolog (S. cerevisiae)                                            |
| 0,974679631 | 0,76494 | 0,910038824 | 0,04032 | CDC42    | cell division cycle 42 (GTP binding protein, 25kDa)                                       |
| 0,986232704 | 0,84991 | 0,915099168 | 0,04563 | CDC42    | cell division cycle 42 (GTP binding protein, 25kDa)                                       |
| 1,111879158 | 0,32374 | 1,167158102 | 0,01782 | CDC42BPA | CDC42 binding protein kinase alpha (DMPK-like)                                            |
| 0,620283649 | 0,0579  | 0,745872013 | 0,00477 | CDC42BPA | CDC42 binding protein kinase alpha (DMPK-like)                                            |
| 1,010451446 | 0,89562 | 0,825877665 | 0,00528 | CDC42BPB | CDC42 binding protein kinase beta (DMPK-like)                                             |
| 1,157490217 | 0,21962 | 1,244011653 | 0,01168 | CDC42EP2 | CDC42 effector protein (Rho GTPase binding) 2                                             |
| 1,293248932 | 0,09189 | 1,327765158 | 0,00039 | CDC42EP3 | CDC42 effector protein (Rho GTPase binding) 3                                             |
| 0,858565436 | 0,08603 | 0,800514811 | 0,00007 | CDC42SE1 | CDC42 small effector 1                                                                    |
| 0,806641759 | 0,18659 | 0,785128119 | 0,00003 | CD5L     | CD5 cell division cycle 5-like (S. pombe)                                                 |
| 0,777007269 | 0,19838 | 0,778085177 | 0,00186 | CD7      | cell division cycle 7 homolog (S. cerevisiae)                                             |
| 1,043911927 | 0,76286 | 0,790589117 | 0,00379 | CD73     | cell division cycle 73, Paf1/RNA polymerase II complex component, homolog (S. cerevisiae) |
| 0,969289817 | 0,85664 | 0,837406488 | 0,02919 | CD73     | cell division cycle 73, Paf1/RNA polymerase II complex component, homolog (S. cerevisiae) |
| 0,968618189 | 0,74671 | 1,128182137 | 0,01488 | CDC43    | cell division cycle associated 3                                                          |
| 0,754190038 | 0,192   | 0,732550437 | 0,00132 | CDC47    | cell division cycle associated 7                                                          |
| 0,919550046 | 0,18913 | 0,782411782 | 0,03658 | CDH12    | cadherin 12, type 2 (N-cadherin 2)                                                        |
| 0,988285652 | 0,90737 | 1,107264584 | 0,01533 | CDH15    | cadherin 15, type 1, M-cadherin (myotubule)                                               |
| 1,108800644 | 0,27443 | 1,202469249 | 0,04604 | CDH19    | cadherin 19, type 2                                                                       |
| 1,20163605  | 0,05752 | 1,149494848 | 0,04312 | CDH2     | cadherin 2, type 1, N-cadherin (neuronal)                                                 |
| 0,929160674 | 0,45713 | 0,915733686 | 0,04253 | CDH20    | cadherin 20, type 2                                                                       |
| 1,069547088 | 0,44361 | 1,114193651 | 0,03563 | CDH22    | cadherin 22, type 2                                                                       |
| 1,058484395 | 0,57553 | 1,114966219 | 0,01272 | CDH23    | cadherin-related 23                                                                       |
| 0,793883931 | 0,20764 | 0,627201102 | 0,00104 | CDH26    | cadherin 26                                                                               |
| 0,853817714 | 0,16028 | 0,78024548  | 0,00472 | CDH26    | cadherin 26                                                                               |
| 1,194163187 | 0,09249 | 1,126619228 | 0,0427  | CDH4     | cadherin 4, type 1, R-cadherin (retinal)                                                  |
| 1,051172909 | 0,56968 | 0,901875378 | 0,04536 | CDHR5    | cadherin-related family member 5                                                          |
| 0,926588062 | 0,72403 | 0,825305409 | 0,00256 | CDK1     | cyclin-dependent kinase 1                                                                 |
| 0,7944344   | 0,05095 | 0,865736566 | 0,03481 | CDK10    | cyclin-dependent kinase 10                                                                |
| 1,011853201 | 0,95468 | 0,865736566 | 0,04889 | CDK12    | cyclin-dependent kinase 12                                                                |
| 1,051901779 | 0,70886 | 0,878430468 | 0,04197 | CDK12    | cyclin-dependent kinase 12                                                                |
| 0,880869374 | 0,45947 | 0,742261785 | 0,01459 | CDK12    | cyclin-dependent kinase 12                                                                |
| 0,879649076 | 0,29686 | 0,84323111  | 0,01104 | CDK12    | cyclin-dependent kinase 12                                                                |
| 0,85027416  | 0,22068 | 0,792784137 | 0,00004 | CDK13    | cyclin-dependent kinase 13                                                                |
| 0,916368645 | 0,3582  | 0,884540435 | 0,02745 | CDK13    | cyclin-dependent kinase 13                                                                |
| 0,862741345 | 0,42627 | 0,664803554 | 0,00115 | CDK13    | cyclin-dependent kinase 13                                                                |
| 1,243363692 | 0,07176 | 1,169587664 | 0,00725 | CDK15    | cyclin-dependent kinase 15                                                                |
| 0,995849753 | 0,97833 | 1,218410264 | 0,01917 | CDK18    | cyclin-dependent kinase 18                                                                |
| 0,723969086 | 0,17342 | 0,835666959 | 0,04619 | CDK19    | cyclin-dependent kinase 19                                                                |
| 0,775930854 | 0,30426 | 0,637722196 | 0,00015 | CDK19    | cyclin-dependent kinase 19                                                                |
| 1,107264584 | 0,31461 | 1,182631    | 0,04051 | CDK2     | cyclin-dependent kinase 2                                                                 |
| 0,933679945 | 0,5396  | 0,849096246 | 0,00905 | CDK2AP1  | cyclin-dependent kinase 2 associated protein 1                                            |
| 1,308578071 | 0,1587  | 1,349102534 | 0,00902 | CDK2AP2  | cyclin-dependent kinase 2 associated protein 2                                            |
| 1,006257823 | 0,96914 | 1,149494848 | 0,02529 | CDK5     | cyclin-dependent kinase 5                                                                 |
| 0,613442489 | 0,12004 | 0,527776859 | 0,00001 | CDK5R1   | cyclin-dependent kinase 5, regulatory subunit 1 (p35)                                     |
| 0,745355193 | 0,08164 | 0,824162085 | 0,0075  | CDK5RAP2 | CDK5 regulatory subunit associated protein 2                                              |
| 1,028826708 | 0,87924 | 1,344434994 | 0,00003 | CDK5RAP3 | CDK5 regulatory subunit associated protein 3                                              |
| 0,811689581 | 0,10082 | 0,902500727 | 0,04738 | CDK6     | cyclin-dependent kinase 6                                                                 |
| 1,00556058  | 0,98806 | 0,774855931 | 0,00977 | CDK6     | cyclin-dependent kinase 6                                                                 |
| 1,035982764 | 0,78675 | 0,814507563 | 0,02413 | CDK6     | cyclin-dependent kinase 6                                                                 |
| 0,730522189 | 0,13844 | 0,720964436 | 0,00063 | CDK8     | cyclin-dependent kinase 8                                                                 |
| 0,720964436 | 0,15012 | 0,689202576 | 0,00029 | CDK8     | cyclin-dependent kinase 8                                                                 |
| 1,155886707 | 0,24086 | 1,192508872 | 0,00668 | CDKL2    | cyclin-dependent kinase-like 2 (CDC2-related kinase)                                      |
| 0,904379378 | 0,48873 | 1,28788163  | 0,00005 | CDKN1C   | cyclin-dependent kinase inhibitor 1C (p57, Kip2)                                          |
| 0,792784137 | 0,16622 | 1,194163187 | 0,04688 | CDKN1C   | cyclin-dependent kinase inhibitor 1C (p57, Kip2)                                          |
| 1,048262476 | 0,79038 | 0,831622098 | 0,04492 | CDKN2AIP | CDKN2A interacting protein                                                                |
| 0,52304247  | 0,05291 | 0,570381858 | 0,00031 | CDKN2B   | cyclin-dependent kinase inhibitor 2B (p15, inhibits CDK4)                                 |
| 1,014662547 | 0,90491 | 1,151887642 | 0,0216  | CDKN2D   | cyclin-dependent kinase inhibitor 2D (p19, inhibits CDK4)                                 |
| 1,017479692 | 0,88949 | 1,139183377 | 0,01468 | CDON     | Cdon homolog (mouse)                                                                      |
| 0,739181216 | 0,35156 | 0,645281245 | 0       | CD51     | CDP-diacylglycerol synthase (phosphatidate cytidylyltransferase) 1                        |
| 1,41519416  | 0,108   | 1,260503392 | 0,03327 | CD52     | CDP-diacylglycerol synthase (phosphatidate cytidylyltransferase) 2                        |
| 0,755236293 | 0,05632 | 0,848507902 | 0,00407 | CDV3     | CDV3 homolog (mouse)                                                                      |



|             |         |              |         |          |                                                                                                   |
|-------------|---------|--------------|---------|----------|---------------------------------------------------------------------------------------------------|
| 0,81056512  | 0,51767 | 0,71449707   | 0,00794 | CDV3     | CDV3 homolog (mouse)                                                                              |
| 1,281647924 | 0,06663 | 1,448942155  | 0,00006 | CDX1     | caudal type homeobox 1                                                                            |
| 0,772175133 | 0,05878 | 0,773246337  | 0,00087 | CDYL     | chromodomain protein, Y-like                                                                      |
| 0,770571108 | 0,05594 | 0,849096246  | 0,0093  | CDYL     | chromodomain protein, Y-like                                                                      |
| 0,778085177 | 0,28606 | 0,724471077  | 0,0014  | CDYL     | chromodomain protein, Y-like                                                                      |
| 1,232852325 | 0,07873 | 1,22603486   | 0,01318 | CDYL2    | chromodomain protein, Y-like 2                                                                    |
| 1,544350266 | 0,21137 | 1,593280193  | 0,00364 | CEACAM1  | carcinoembryonic antigen-related cell adhesion molecule 1 (biliary glycoprotein)                  |
| 1,366987452 | 0,08281 | 1,43097652   | 0,00535 | CEACAM1  | carcinoembryonic antigen-related cell adhesion molecule 1 (biliary glycoprotein)                  |
| 1,509425969 | 0,1024  | 1,566994374  | 0,00155 | CEACAM1  | carcinoembryonic antigen-related cell adhesion molecule 1 (biliary glycoprotein)                  |
| 1,063632673 | 0,44029 | 1,189207115  | 0,00104 | CEACAM21 | carcinoembryonic antigen-related cell adhesion molecule 21                                        |
| 1,116512962 | 0,27273 | 1,21335356   | 0,00345 | CEACAM3  | carcinoembryonic antigen-related cell adhesion molecule 3                                         |
| 1,190856849 | 0,06343 | 1,237990291  | 0,00082 | CEACAM3  | carcinoembryonic antigen-related cell adhesion molecule 3                                         |
| 1,143930973 | 0,18223 | 1,196648963  | 0,00087 | CEACAM4  | carcinoembryonic antigen-related cell adhesion molecule 4                                         |
| 0,856781955 | 0,39577 | 0,70027816   | 0,00315 | CEACAM5  | carcinoembryonic antigen-related cell adhesion molecule 5                                         |
| 0,777546036 | 0,13804 | 0,817335328  | 0,00074 | CEBPZ    | CCAAT/enhancer binding protein (C/EBP), zeta                                                      |
| 1,220946513 | 0,05246 | 1,131314463  | 0,01121 | CECR2    | cat eye syndrome chromosome region, candidate 2                                                   |
| 0,898755127 | 0,21061 | 0,855002178  | 0,00204 | CECR5    | cat eye syndrome chromosome region, candidate 5                                                   |
| 0,949342121 | 0,56278 | 0,85086373   | 0,04981 | CECR9    | cat eye syndrome chromosome region, candidate 9 (non-protein coding)                              |
| 1,024556823 | 0,83936 | 1,20664392   | 0,0002  | CELA3A   | chymotrypsin-like elastase family, member 3A                                                      |
| 0,934327347 | 0,61058 | 0,851453708  | 0,00611 | CELF1    | CUGBP, Elav-like family member 1                                                                  |
| 1,019597683 | 0,87039 | 1,162314108  | 0,02711 | CELF1    | CUGBP, Elav-like family member 1                                                                  |
| 1,084477409 | 0,31454 | 1,149494848  | 0,02057 | CELF1    | CUGBP, Elav-like family member 1                                                                  |
| 1,190031696 | 0,07984 | 1,209155676  | 0,00637 | CELF2    | CUGBP, Elav-like family member 2                                                                  |
| 1,183451022 | 0,08271 | 1,29145735   | 0,0006  | CELF2    | CUGBP, Elav-like family member 2                                                                  |
| 1,187559666 | 0,12283 | 1,172022284  | 0,00126 | CELF3    | CUGBP, Elav-like family member 3                                                                  |
| 0,891310496 | 0,33089 | 0,872967591  | 0,04872 | CELSR1   | cadherin, EGF LAG seven-pass G-type receptor 1 (flamingo homolog, Drosophila)                     |
| 1,155886707 | 0,09931 | 1,178539408  | 0,00112 | CELSR3   | cadherin, EGF LAG seven-pass G-type receptor 3 (flamingo homolog, Drosophila)                     |
| 0,862741345 | 0,14141 | 1,122721422  | 0,04853 | CEND1    | cell cycle exit and neuronal differentiation 1                                                    |
| 1,012554807 | 0,89474 | 1,155085785  | 0,0409  | CENPA    | centromere protein A                                                                              |
| 0,903752727 | 0,63092 | 0,816768991  | 0,02656 | CENPBD1  | CENPB DNA-binding domains containing 1                                                            |
| 0,739181216 | 0,12378 | 0,843815796  | 0,00759 | CENPJ    | centromere protein J                                                                              |
| 0,898132373 | 0,30365 | 0,814507563  | 0,01898 | CENPL    | centromere protein L                                                                              |
| 0,943438251 | 0,72376 | 0,851453708  | 0,01754 | CENPL    | centromere protein L                                                                              |
| 0,977385766 | 0,82469 | 0,805524291  | 0,0033  | CENPN    | centromere protein N                                                                              |
| 0,749499801 | 0,08819 | 0,749499801  | 0,00035 | CENPN    | centromere protein N                                                                              |
| 1,22603486  | 0,33771 | 0,837406488  | 0,02407 | CENPQ    | centromere protein Q                                                                              |
| 1,244011653 | 0,06704 | 1,222640278  | 0,0272  | CENPV    | centromere protein V                                                                              |
| 0,950659101 | 0,53499 | 1,111879158  | 0,0346  | CENPV    | centromere protein V                                                                              |
| 0,731028724 | 0,27847 | 0,859756486  | 0,02584 | CEP104   | centrosomal protein 104kDa                                                                        |
| 0,857376037 | 0,36693 | 0,699792933  | 0,00035 | CEP104   | centrosomal protein 104kDa                                                                        |
| 1,121943481 | 0,15256 | 1,122721422  | 0,02697 | CEP128   | centrosomal protein 128kDa                                                                        |
| 0,943438251 | 0,52404 | 0,906890329  | 0,02063 | CEP135   | centrosomal protein 135kDa                                                                        |
| 1,048262476 | 0,87452 | 0,831622098  | 0,01913 | CEP164   | centrosomal protein 164kDa                                                                        |
| 1,031683179 | 0,74756 | 1,165541198  | 0,01747 | CEP250   | centrosomal protein 250kDa                                                                        |
| 1,029540083 | 0,77821 | 1,155085785  | 0,00238 | CEP290   | centrosomal protein 290kDa                                                                        |
| 1,017479692 | 0,95743 | 0,845572287  | 0,02811 | CEP350   | centrosomal protein 350kDa                                                                        |
| 0,901875378 | 0,65479 | 0,800514811  | 0,01025 | CEP350   | centrosomal protein 350kDa                                                                        |
| 0,790589117 | 0,31575 | 0,723467443  | 0,00142 | CEP350   | centrosomal protein 350kDa                                                                        |
| 0,722465199 | 0,13796 | 0,740206649  | 0,00196 | CEP350   | centrosomal protein 350kDa                                                                        |
| 0,788946841 | 0,26003 | 0,771105413  | 0,01373 | CEP44    | centrosomal protein 44kDa                                                                         |
| 0,967947027 | 0,83145 | 0,792234811  | 0,00251 | CEP44    | centrosomal protein 44kDa                                                                         |
| 0,636397468 | 0,09001 | 0,705637922  | 0,00518 | CEP57    | centrosomal protein 57kDa                                                                         |
| 0,856781955 | 0,46725 | 0,773246337  | 0,01652 | CEP57    | centrosomal protein 57kDa                                                                         |
| 0,764718139 | 0,12013 | 0,819604608  | 0,00205 | CEP63    | centrosomal protein 63kDa                                                                         |
| 0,718470088 | 0,11739 | 0,692074858  | 0,00643 | CEP76    | centrosomal protein 76kDa                                                                         |
| 0,642157904 | 0,08905 | 0,690158677  | 0,03182 | CEP76    | centrosomal protein 76kDa                                                                         |
| 0,918912883 | 0,28287 | 0,89564567   | 0,00217 | CEP89    | centrosomal protein 89kDa                                                                         |
| 0,841479482 | 0,21549 | 0,784040454  | 0,00073 | CEP95    | centrosomal protein 95kDa                                                                         |
| 0,910669834 | 0,48893 | 0,862741345  | 0,02318 | CEPT1    | choline/ethanolamine phosphotransferase 1                                                         |
| 1,257884972 | 0,12224 | 1,231998073  | 0,00483 | CERS2    | ceramide synthase 2                                                                               |
| 0,905633983 | 0,68114 | 0,806641759  | 0,00248 | CERS6    | ceramide synthase 6                                                                               |
| 0,727994774 | 0,15836 | 0,712025098  | 0,00005 | CERS6    | ceramide synthase 6                                                                               |
| 0,841479482 | 0,38738 | 0,756283999  | 0,00226 | CETN3    | centrin, EF-hand protein, 3                                                                       |
| 1,245737416 | 0,06454 | 1,180992661  | 0,00637 | CETP     | cholesteryl ester transfer protein, plasma                                                        |
| 1,45296505  | 0,06412 | 1,582274602  | 0,00006 | CFB      | complement factor B                                                                               |
| 1,050444544 | 0,55786 | 0,893165852  | 0,02638 | CFC1     | cripto, FRL-1, cryptic family 1                                                                   |
| 0,684441907 | 0,05126 | 0,87539133   | 0,04965 | CFDP1    | craniofacial development protein 1                                                                |
| 1,351910833 | 0,12902 | 1,508380077  | 0,01163 | CFH      | complement factor H                                                                               |
| 1,53261996  | 0,08833 | 1,783857039  | 0,01315 | CFI      | complement factor I                                                                               |
| 1,122721422 | 0,66218 | 1,264003098  | 0,01666 | CFLAR    | CASP8 and FADD-like apoptosis regulator                                                           |
| 1,138394029 | 0,59376 | 1,162314108  | 0,0134  | CFLAR    | CASP8 and FADD-like apoptosis regulator                                                           |
| 1,059218335 | 0,83108 | 1,135242102  | 0,02767 | CFLAR    | CASP8 and FADD-like apoptosis regulator                                                           |
| 1,215879283 | 0,41649 | 1,194991205  | 0,01274 | CFLAR    | CASP8 and FADD-like apoptosis regulator                                                           |
| 1,101905116 | 0,48567 | 1,114193651  | 0,0373  | CFLAR    | CASP8 and FADD-like apoptosis regulator                                                           |
| 0,684441907 | 0,13122 | 0,79940583   | 0,00847 | CFLAR    | CASP8 and FADD-like apoptosis regulator                                                           |
| 1,008352455 | 0,93878 | 0,817902059  | 0,01267 | CFTR     | cystic fibrosis transmembrane conductance regulator (ATP-binding cassette sub-family C, member 7) |
| 0,91383145  | 0,59359 | 0,871154192  | 0,0237  | CGGBP1   | CGG triplet repeat binding protein 1                                                              |
| 1,088997015 | 0,50385 | 0,848507902  | 0,01744 | CGRRF1   | cell growth regulator with ring finger domain 1                                                   |
| 1,101905116 | 0,25569 | 1,167967395  | 0,01363 | CHADL    | chondroadherin-like                                                                               |
| 0,808320869 | 0,05791 | 0,849096246  | 0,01457 | CHCHD1   | coiled-coil-helix-coiled-coil-helix domain containing 1                                           |
| 1,102669163 | 0,65123 | 1,215879283  | 0,02193 | CHCHD10  | coiled-coil-helix-coiled-coil-helix domain containing 10                                          |
| 0,938221197 | 0,52383 | 0,906261938  | 0,01943 | CHCHD3   | coiled-coil-helix-coiled-coil-helix domain containing 3                                           |
| 0,923382311 | 0,36042 | 1,111108729  | 0,01138 | CHCHD5   | coiled-coil-helix-coiled-coil-helix domain containing 5                                           |
| 1,010451446 | 0,94696 | 0,801069878  | 0,00641 | CHCHD7   | coiled-coil-helix-coiled-coil-helix domain containing 7                                           |
| 0,985549337 | 0,86329 | 0,884540435  | 0,03203 | CHCHD7   | coiled-coil-helix-coiled-coil-helix domain containing 7                                           |
| 0,871154192 | 0,14034 | 0,865736566  | 0,00522 | CHCHD8   | coiled-coil-helix-coiled-coil-helix domain containing 8                                           |
| 0,831622098 | 0,32929 | 0,776468875  | 0,01433 | CHD1     | chromodomain helicase DNA binding protein 1                                                       |
| 0,785128119 | 0,34314 | 0,7944344    | 0,00848 | CHD1     | chromodomain helicase DNA binding protein 1                                                       |
| 0,824162085 | 0,27442 | 0,724471077  | 0,00195 | CHD1L    | chromodomain helicase DNA binding protein 1-like                                                  |
| 0,872362706 | 0,23483 | 0,784584098  | 0,00035 | CHD2     | chromodomain helicase DNA binding protein 2                                                       |
| 0,844400887 | 0,16701 | 0,794985251  | 0,00238 | CHD2     | chromodomain helicase DNA binding protein 2                                                       |
| 0,955945318 | 0,8528  | 0,723969086  | 0,01189 | CHD2     | chromodomain helicase DNA binding protein 2                                                       |
| 1,029540083 | 0,84989 | 1,257884972  | 0,00606 | CHD3     | chromodomain helicase DNA binding protein 3                                                       |
| 0,816768991 | 0,20905 | 0,710053679  | 0,00039 | CHD6     | chromodomain helicase DNA binding protein 6                                                       |
| 0,856781955 | 0,53263 | 0,847332435  | 0,03363 | CHD6     | chromodomain helicase DNA binding protein 6                                                       |
| 1,079228237 | 0,42606 | 1,092020546  | 0,04149 | CHD6     | chromodomain helicase DNA binding protein 6                                                       |
| 0,78024548  | 0,18955 | 0,866336856  | 0,01389 | CHD7     | chromodomain helicase DNA binding protein 7                                                       |
| 0,943438251 | 0,78996 | 0,851453708  | 0,00897 | CHD9     | chromodomain helicase DNA binding protein 9                                                       |
| 0,880259014 | 0,21669 | 0,879039561  | 0,04429 | CHD9     | chromodomain helicase DNA binding protein 9                                                       |
| 0,847332435 | 0,39317 | 0,824733549  | 0,03625 | CHEK1    | CHK1 checkpoint homolog (S. pombe)                                                                |
| 1,071030823 | 0,48334 | 1,165541198  | 0,01439 | CHERP    | calcium homeostasis endoplasmic reticulum protein                                                 |
| 0,948026965 | 0,60863 | 0,859756486  | 0,01682 | CHERP    | calcium homeostasis endoplasmic reticulum protein                                                 |
| 1,030968319 | 0,6595  | 0,910038824  | 0,02471 | CHFR     | checkpoint with forkhead and ring finger domains                                                  |
| 1,136816973 | 0,55105 | 1,2345626207 | 0,00376 | CHID1    | chitinase domain containing 1                                                                     |

|             |         |              |         |           |                                                                                   |
|-------------|---------|--------------|---------|-----------|-----------------------------------------------------------------------------------|
| 0,951318276 | 0,70992 | 1,20664392   | 0,00276 | CHIT1     | chitinase 1 (chitotriosidase)                                                     |
| 0,944747041 | 0,74816 | 1,180174343  | 0,0043  | CHKB      | choline kinase beta                                                               |
| 0,910669834 | 0,36866 | 0,83931044   | 0,00953 | CHML      | choroideremia-like (Rab escort protein 2)                                         |
| 0,718470088 | 0,10359 | 0,684441907  | 0,00052 | CHML      | choroideremia-like (Rab escort protein 2)                                         |
| 0,557483109 | 0,16727 | 0,881480158  | 0,0164  | CHMP2A    | chromatin modifying protein 2A                                                    |
| 0,736113431 | 0,06921 | 0,659296807  | 0,00002 | CHMP2B    | chromatin modifying protein 2B                                                    |
| 0,681129017 | 0,29559 | 0,671751713  | 0,00001 | CHMP2B    | chromatin modifying protein 2B                                                    |
| 0,817335328 | 0,2073  | 0,745355193  | 0,00283 | CHMP2B    | chromatin modifying protein 2B                                                    |
| 1,169587664 | 0,38802 | 1,481439798  | 0,00964 | CHMP4B    | chromatin modifying protein 4B                                                    |
| 1,223488041 | 0,10825 | 1,41519416   | 0,00403 | CHN1      | chimerin (chimaerin) 1                                                            |
| 1,051172909 | 0,56221 | 1,153485605  | 0,00443 | CHN2      | chimerin (chimaerin) 2                                                            |
| 1,238848698 | 0,12187 | 1,188383105  | 0,04396 | CHPF2     | chondroitin polymerizing factor 2                                                 |
| 1,300401147 | 0,14813 | 1,314031627  | 0,0002  | CHPF2     | chondroitin polymerizing factor 2                                                 |
| 1,116512962 | 0,56642 | 0,882702996  | 0,03305 | CHPT1     | choline phosphotransferase 1                                                      |
| 0,863339559 | 0,19669 | 0,811689581  | 0,00002 | CHRAC1    | chromatin accessibility complex 1                                                 |
| 1,065108203 | 0,59468 | 1,29145735   | 0,00704 | CHRD      | chordin                                                                           |
| 1,260503392 | 0,05319 | 1,33422317   | 0,00416 | CHRD2L    | chordin-like 2                                                                    |
| 1,106497353 | 0,22    | 1,154285418  | 0,00209 | CHRM1     | cholinergic receptor, muscarinic 1                                                |
| 1,030968319 | 0,78834 | 1,149494848  | 0,00626 | CHRM4     | cholinergic receptor, muscarinic 4                                                |
| 1,041743429 | 0,70068 | 1,143138335  | 0,0072  | CHRNA10   | cholinergic receptor, nicotinic, alpha 10                                         |
| 1,063632673 | 0,549   | 1,167967395  | 0,01768 | CHRNA2    | cholinergic receptor, nicotinic, alpha 2 (neuronal)                               |
| 1,052631155 | 0,56421 | 1,10343374   | 0,02991 | CHRN82    | cholinergic receptor, nicotinic, beta 2 (neuronal)                                |
| 1,096571589 | 0,42999 | 1,128182137  | 0,00858 | CHRNA2    | cholinergic receptor, nicotinic, delta                                            |
| 1,178539408 | 0,09274 | 1,257013375  | 0,00489 | CHST1     | carbohydrate (keratan sulfate Gal-6) sulfotransferase 1                           |
| 0,980779004 | 0,81114 | 1,110338834  | 0,02616 | CHST13    | carbohydrate (chondroitin 4) sulfotransferase 13                                  |
| 1,122721422 | 0,16176 | 1,186736798  | 0,00836 | CHST14    | carbohydrate (N-acetylgalactosamine 4-O) sulfotransferase 14                      |
| 0,919550046 | 0,59854 | 0,792784137  | 0,00481 | CHUK      | conserved helix-loop-helix ubiquitin kinase                                       |
| 0,743806881 | 0,20119 | 0,687770909  | 0,00003 | CHURC1    | churchill domain containing 1                                                     |
| 0,745355193 | 0,05216 | 0,810003474  | 0,04963 | CHURC1    | churchill domain containing 1                                                     |
| 1,074749173 | 0,44199 | 0,1095052471 | 0,03635 | CIAO1     | cytosolic iron-sulfur protein assembly 1                                          |
| 0,937571096 | 0,6638  | 0,831622098  | 0,00017 | CIAPIN1   | cytokine induced apoptosis inhibitor 1                                            |
| 0,754190038 | 0,07044 | 0,808881348  | 0,00247 | CIAPIN1   | cytokine induced apoptosis inhibitor 1                                            |
| 0,956608158 | 0,87686 | 1,321338406  | 0,00047 | CIB1      | calcium and integrin binding 1 (calmyrin)                                         |
| 1,095811766 | 0,25048 | 1,241424792  | 0,00006 | CIDEC     | cell death-inducing DFFA-like effector c                                          |
| 1,115739322 | 0,21472 | 1,187559666  | 0,01034 | CIITA     | class II, major histocompatibility complex, transactivator                        |
| 1,10343374  | 0,32938 | 1,115739322  | 0,03762 | CIITA     | class II, major histocompatibility complex, transactivator                        |
| 1,253533002 | 0,07706 | 1,305859787  | 0,03324 | CILP2     | cartilage intermedial layer protein 2                                             |
| 0,938871747 | 0,65842 | 1,335148303  | 0,01913 | CIRBP     | cold inducible RNA binding protein                                                |
| 1,003471749 | 0,97646 | 1,176906737  | 0,04426 | CIRBP     | cold inducible RNA binding protein                                                |
| 0,961260928 | 0,80847 | 1,498999602  | 0,0012  | CIRBP     | cold inducible RNA binding protein                                                |
| 0,547146851 | 0,07887 | 0,751059963  | 0,00036 | CIRH1A    | cirrhosis, autosomal recessive 1A (cirhin)                                        |
| 0,918276162 | 0,40102 | 0,880259014  | 0,0227  | CISD1     | CDGSH iron sulfur domain 1                                                        |
| 0,981459064 | 0,87079 | 0,85797053   | 0,00197 | CISD2     | CDGSH iron sulfur domain 2                                                        |
| 1,030253954 | 0,74789 | 1,126619228  | 0,0224  | CITED1    | Cbp/p300-interacting transactivator, with Glu/Asp-rich carboxy-terminal domain, 1 |
| 1,041743429 | 0,8832  | 0,744838732  | 0,00844 | CKAP4     | cytoskeleton-associated protein 4                                                 |
| 1,076986376 | 0,4098  | 1,136816973  | 0,02643 | CKM       | creatine kinase, muscle                                                           |
| 0,66296288  | 0,16763 | 0,882091365  | 0,02992 | CLASP2    | cytoplasmic linker associated protein 2                                           |
| 0,910669834 | 0,58944 | 0,712518807  | 0,00175 | CLASP2    | cytoplasmic linker associated protein 2                                           |
| 1,084477409 | 0,62958 | 1,212512819  | 0,03938 | CLASRP    | CLK4-associating serine/arginine rich protein                                     |
| 0,737645729 | 0,1482  | 0,85027416   | 0,01946 | CLCA2     | chloride channel accessory 2                                                      |
| 2,033549347 | 0,10259 | 1,815038311  | 0,00449 | CLCA4     | chloride channel accessory 4                                                      |
| 0,944747041 | 0,53962 | 0,851453708  | 0,00226 | CLCN2     | chloride channel 2                                                                |
| 0,654289036 | 0,11836 | 0,695923196  | 0,00108 | CLCN3     | chloride channel 3                                                                |
| 0,978063473 | 0,72885 | 1,185914499  | 0,00423 | CLCN4     | chloride channel 4                                                                |
| 1,035982764 | 0,76628 | 0,917004043  | 0,049   | CLCN5     | chloride channel 5                                                                |
| 0,895025071 | 0,44384 | 0,844400887  | 0,0137  | CLCN5     | chloride channel 5                                                                |
| 0,994470169 | 0,95679 | 0,835087919  | 0,0025  | CLCN5     | chloride channel 5                                                                |
| 1,237132479 | 0,1728  | 0,806734863  | 0,04272 | CLCN6     | chloride channel 6                                                                |
| 0,986232704 | 0,90257 | 1,182631     | 0,00934 | CLCN7     | chloride channel 7                                                                |
| 0,796088099 | 0,30492 | 0,753145233  | 0,00835 | CLDN12    | claudin 12                                                                        |
| 1,087488391 | 0,32437 | 1,212512819  | 0,01787 | CLDN15    | claudin 15                                                                        |
| 1,105790653 | 0,24629 | 1,151089491  | 0,01228 | CLDN15    | claudin 15                                                                        |
| 1,043188594 | 0,63052 | 0,902500727  | 0,02614 | CLDN23    | claudin 23                                                                        |
| 1,304050735 | 0,27233 | 0,828170661  | 0,04882 | CLDN23    | claudin 23                                                                        |
| 1,32317144  | 0,05945 | 1,48246701   | 0,00248 | CLDN5     | claudin 5                                                                         |
| 1,145517898 | 0,65006 | 1,350974085  | 0,0144  | CLDN7     | claudin 7                                                                         |
| 0,988285652 | 0,9275  | 1,179356592  | 0,0179  | CLDN9     | claudin 9                                                                         |
| 1,226884977 | 0,05089 | 1,153485605  | 0,02097 | CLEC12A   | C-type lectin domain family 12, member A                                          |
| 1,093535457 | 0,67402 | 1,390881972  | 0,00347 | CLEC2B    | C-type lectin domain family 2, member B                                           |
| 1,134455485 | 0,12215 | 1,292352831  | 0,0004  | CLEC3A    | C-type lectin domain family 3, member A                                           |
| 1,223488041 | 0,42818 | 1,476314406  | 0,00267 | CLEC3B    | C-type lectin domain family 3, member B                                           |
| 0,978063473 | 0,78097 | 1,130530567  | 0,02302 | CLEC4F    | C-type lectin domain family 4, member F                                           |
| 1,132098902 | 0,24979 | 1,225185332  | 0,00173 | CLEC4G1   | C-type lectin domain family 4, member G pseudogene 1                              |
| 1,123499903 | 0,14705 | 1,143138335  | 0,00871 | CLEC4M    | C-type lectin domain family 4, member M                                           |
| 0,924663278 | 0,22394 | 0,846158597  | 0,00098 | CLEC5A    | C-type lectin domain family 5, member A                                           |
| 0,971980988 | 0,70719 | 1,152686347  | 0,00232 | CLIC5     | chloride intracellular channel 5                                                  |
| 1,132883885 | 0,17062 | 1,116512962  | 0,02523 | CLIC6     | chloride intracellular channel 6                                                  |
| 0,879649076 | 0,77353 | 0,537374586  | 0,00002 | CLINT1    | clathrin interactor 1                                                             |
| 0,664342907 | 0,07989 | 0,709561678  | 0,00104 | CLIP1     | CAP-GLY domain containing linker protein 1                                        |
| 0,655196702 | 0,27556 | 0,60332196   | 0,01922 | CLIP1     | CAP-GLY domain containing linker protein 1                                        |
| 1,185092771 | 0,30278 | 1,408344227  | 0,00107 | CLIP3     | CAP-GLY domain containing linker protein 3                                        |
| 0,568014632 | 0,05811 | 0,653835674  | 0,00232 | CLIP4     | CAP-GLY domain containing linker protein family, member 4                         |
| 0,674083866 | 0,09027 | 0,807760778  | 0,01226 | CLK4      | CDC-like kinase 4                                                                 |
| 0,957935218 | 0,79072 | 0,855595026  | 0,04161 | CLMN      | calmin (calponin-like, transmembrane)                                             |
| 1,093535457 | 0,54298 | 1,295042999  | 0,00044 | CLN3      | ceroid-lipofuscinosis, neuronal 3                                                 |
| 1,05553718  | 0,70032 | 1,193335743  | 0,00904 | CLN3      | ceroid-lipofuscinosis, neuronal 3                                                 |
| 1,147107024 | 0,26434 | 1,234562607  | 0,00095 | CLN6      | ceroid-lipofuscinosis, neuronal 6, late infantile, variant                        |
| 1,076240125 | 0,50885 | 1,137605228  | 0,01839 | CLOCK     | clock homolog (mouse)                                                             |
| 1,077733145 | 0,52131 | 1,20664392   | 0,02281 | CLP1      | CLP1, cleavage and polyadenylation factor I subunit, homolog (S. cerevisiae)      |
| 1,257013375 | 0,16605 | 1,402499251  | 0,00003 | CLPTM1    | cleft lip and palate associated transmembrane protein 1                           |
| 1,065846736 | 0,87172 | 1,563739286  | 0,00001 | CLPTM1    | cleft lip and palate associated transmembrane protein 1                           |
| 1,332374825 | 0,51542 | 1,660940048  | 0,00007 | CLPTM1L   | CLPTM1-like                                                                       |
| 0,76154437  | 0,21127 | 0,79940583   | 0,00019 | CLPX      | ClpX caseinolytic peptidase X homolog (E. coli)                                   |
| 0,955945318 | 0,60249 | 1,123499903  | 0,01717 | CLRN1-AS1 | CLRN1 antisense RNA 1 (non-protein coding)                                        |
| 1,300440147 | 0,08979 | 1,467133344  | 0,00005 | CLSTN3    | calsyntenin 3                                                                     |
| 0,972654947 | 0,81165 | 1,183451022  | 0,00455 | CLTCL1    | clathrin, heavy chain-like 1                                                      |
| 1,021720083 | 0,94255 | 1,399585866  | 0,02221 | CLU       | clusterin                                                                         |
| 0,946057647 | 0,53555 | 0,858565436  | 0,0359  | CLUAP1    | clusterin associated protein 1                                                    |
| 0,836826243 | 0,19262 | 0,808320869  | 0,00163 | CMAS      | cytidine monophosphate N-acetylnauraminic acid synthetase                         |
| 1,100378609 | 0,47193 | 0,837406488  | 0,01865 | CMC1      | COX assembly mitochondrial protein homolog (S. cerevisiae)                        |
| 0,893165852 | 0,34147 | 0,798851916  | 0,02662 | CMIP      | c-Maf inducing protein                                                            |
| 1,165541198 | 0,14731 | 1,225185332  | 0,0011  | CMKLR1    | chemokine-like receptor 1                                                         |
| 0,877213549 | 0,41528 | 0,845572287  | 0,00478 | CMPK1     | cytidine monophosphate (UMP-CMP) kinase 1, cytosolic                              |
| 0,963261894 | 0,74758 | 0,864537231  | 0,02728 | CMPK1     | cytidine monophosphate (UMP-CMP) kinase 1, cytosolic                              |

|             |         |             |         |          |                                                                    |
|-------------|---------|-------------|---------|----------|--------------------------------------------------------------------|
| 1,376495602 | 0,13448 | 0,678302164 | 0,00913 | CMPK2    | cytidine monophosphate (UMP-CMP) kinase 2, mitochondrial           |
| 1,447938172 | 0,05038 | 1,402499251 | 0,00027 | CMTM3    | CKLF-like MARVEL transmembrane domain containing 3                 |
| 1,304954948 | 0,05696 | 1,261377409 | 0,00474 | CMTM3    | CKLF-like MARVEL transmembrane domain containing 3                 |
| 1,159095952 | 0,12583 | 1,128182137 | 0,01509 | CMTM4    | CKLF-like MARVEL transmembrane domain containing 4                 |
| 1,069547088 | 0,82578 | 0,872362706 | 0,0448  | CMTM4    | CKLF-like MARVEL transmembrane domain containing 4                 |
| 1,136029265 | 0,21349 | 1,124278924 | 0,02213 | CMTM5    | CKLF-like MARVEL transmembrane domain containing 5                 |
| 0,884540435 | 0,37764 | 0,753667455 | 0,00026 | CNBP     | CCHC-type zinc finger, nucleic acid binding protein                |
| 1,108800644 | 0,34961 | 1,151887642 | 0,0072  | CNDP1    | carnosine dipeptidase 1 (metallopeptidase M20 family)              |
| 1,136816973 | 0,2018  | 1,112650121 | 0,03158 | CNGB1    | cyclic nucleotide gated channel beta 1                             |
| 1,150291893 | 0,11416 | 1,20163605  | 0,00089 | CNGB3    | cyclic nucleotide gated channel beta 3                             |
| 0,85027416  | 0,32833 | 0,723969086 | 0,00038 | CNIH4    | cornichon homolog 4 (Drosophila)                                   |
| 0,848507902 | 0,16075 | 0,777546036 | 0,00396 | CNIH4    | cornichon homolog 4 (Drosophila)                                   |
| 0,882702996 | 0,24392 | 0,880869374 | 0,04712 | CNIH4    | cornichon homolog 4 (Drosophila)                                   |
| 0,953959551 | 0,63228 | 0,821880187 | 0,00512 | CNKS1    | connector enhancer of kinase suppressor of Ras 1                   |
| 0,899378312 | 0,55119 | 0,778085177 | 0,02272 | CNN3     | calponin 3, acidic                                                 |
| 1,115739322 | 0,31114 | 1,156688184 | 0,01656 | CNNM2    | cyclin M2                                                          |
| 0,813379198 | 0,1575  | 0,793333843 | 0,00167 | CNO      | cappuccino homolog (mouse)                                         |
| 0,901250463 | 0,61766 | 0,920825697 | 0,04109 | CNOT2    | CCR4-NOT transcription complex, subunit 2                          |
| 0,688247801 | 0,05079 | 0,860949188 | 0,00307 | CNOT4    | CCR4-NOT transcription complex, subunit 4                          |
| 0,691116103 | 0,05722 | 0,708087719 | 0,00026 | CNOT4    | CCR4-NOT transcription complex, subunit 4                          |
| 0,89688816  | 0,4912  | 0,828170661 | 0,00995 | CNOT7    | CCR4-NOT transcription complex, subunit 7                          |
| 0,950659101 | 0,77573 | 0,867538687 | 0,03812 | CNOT8    | CCR4-NOT transcription complex, subunit 8                          |
| 0,848507902 | 0,21131 | 0,811127156 | 0,00826 | CNPPD1   | cyclin Pas1/PHO80 domain containing 1                              |
| 1,121166078 | 0,46104 | 1,234562607 | 0,00029 | CNPY2    | canopy 2 homolog (zebrafish)                                       |
| 0,886996305 | 0,72373 | 1,138394029 | 0,02184 | CNPY2    | canopy 2 homolog (zebrafish)                                       |
| 0,853226098 | 0,29041 | 0,839149637 | 0,01079 | CNPY2    | canopy 2 homolog (zebrafish)                                       |
| 1,262252032 | 0,2064  | 1,195819797 | 0,04426 | CNPY3    | canopy 3 homolog (zebrafish)                                       |
| 1,240567298 | 0,20439 | 1,294145654 | 0,0179  | CNPY3    | canopy 3 homolog (zebrafish)                                       |
| 1,127400412 | 0,37496 | 1,170222824 | 0,00719 | CNR1     | cannabinoid receptor 1 (brain)                                     |
| 1,139183377 | 0,24977 | 1,199971382 | 0,00938 | CNR2     | cannabinoid receptor 2 (macrophage)                                |
| 1,032398535 | 0,83822 | 0,860949188 | 0,04508 | CNST     | consortin, connexin sorting protein                                |
| 0,877213549 | 0,16611 | 0,886381699 | 0,04272 | CNST     | consortin, connexin sorting protein                                |
| 0,782411782 | 0,23413 | 0,786217292 | 0,00868 | CNST     | consortin, connexin sorting protein                                |
| 0,889458994 | 0,37135 | 0,744322628 | 0,0003  | CNTNAP2  | contactin associated protein-like 2                                |
| 0,6341957   | 0,09551 | 0,721464343 | 0,00122 | CNTNAP3  | contactin associated protein-like 3                                |
| 0,683967652 | 0,05032 | 0,732042848 | 0,00093 | CNTNAP3  | contactin associated protein-like 3                                |
| 0,897510051 | 0,22837 | 1,160703914 | 0,02141 | CNTNAP5  | contactin associated protein-like 5                                |
| 1,155085785 | 0,32559 | 1,133669413 | 0,02818 | CNTRL    | centriolin                                                         |
| 0,905633983 | 0,18423 | 0,863938187 | 0,02538 | CNTRL    | centriolin                                                         |
| 0,748461493 | 0,39002 | 0,806641759 | 0,02212 | COCH     | coagulation factor C homolog, cochlin (Limulus polyphemus)         |
| 0,882702996 | 0,50162 | 0,840896415 | 0,00104 | COG5     | component of oligomeric golgi complex 5                            |
| 0,774319028 | 0,0531  | 0,774855931 | 0,00373 | COG5     | component of oligomeric golgi complex 5                            |
| 0,921464186 | 0,69441 | 0,774855931 | 0,00004 | COIL     | coilin                                                             |
| 1,00556058  | 0,95627 | 1,202469249 | 0,00372 | COL11A2  | collagen, type XI, alpha 2                                         |
| 1,101905116 | 0,33517 | 1,285206337 | 0,00419 | COL13A1  | collagen, type XIII, alpha 1                                       |
| 1,665551542 | 0,06817 | 1,285206337 | 0,02166 | COL13A1  | collagen, type XIII, alpha 1                                       |
| 1,246601194 | 0,08957 | 1,204137381 | 0,0056  | COL13A1  | collagen, type XIII, alpha 1                                       |
| 1,367935304 | 0,17625 | 1,618884433 | 0,00648 | COL14A1  | collagen, type XIV, alpha 1                                        |
| 1,160703914 | 0,09874 | 1,322254605 | 0,00089 | COL14A1  | collagen, type XIV, alpha 1                                        |
| 1,092020546 | 0,33773 | 1,159899655 | 0,01138 | COL1A1   | collagen, type I, alpha 1                                          |
| 0,786217292 | 0,56432 | 1,456999114 | 0,03164 | COL1A1   | collagen, type I, alpha 1                                          |
| 0,735093668 | 0,21772 | 0,683967652 | 0,00686 | COL21A1  | collagen, type XXI, alpha 1                                        |
| 1,142346247 | 0,22902 | 1,22010051  | 0,00195 | COL22A1  | collagen, type XXII, alpha 1                                       |
| 1,205807828 | 0,09322 | 1,196648963 | 0,00414 | COL25A1  | collagen, type XXV, alpha 1                                        |
| 0,866336856 | 0,29256 | 1,126619228 | 0,04642 | COL2A1   | collagen, type II, alpha 1                                         |
| 1,505246747 | 0,14299 | 1,938579634 | 0,00007 | COL4A1   | collagen, type IV, alpha 1                                         |
| 1,876442393 | 0,13959 | 2,006943497 | 0,00001 | COL4A2   | collagen, type IV, alpha 2                                         |
| 1,195819797 | 0,08118 | 1,22603486  | 0,00237 | COL4A3   | collagen, type IV, alpha 3 (Goodpasture antigen)                   |
| 1,147107024 | 0,07047 | 1,121166078 | 0,00285 | COL4A3   | collagen, type IV, alpha 3 (Goodpasture antigen)                   |
| 0,837406488 | 0,43542 | 0,809442217 | 0,00823 | COL4A3BP | collagen, type IV, alpha 3 (Goodpasture antigen) binding protein   |
| 0,803850991 | 0,36088 | 0,831622098 | 0,0059  | COL4A3BP | collagen, type IV, alpha 3 (Goodpasture antigen) binding protein   |
| 1,33422317  | 0,13066 | 1,30224419  | 0,03404 | COL5A1   | collagen, type V, alpha 1                                          |
| 0,93109482  | 0,78069 | 1,417157397 | 0,01126 | COL5A1   | collagen, type V, alpha 1                                          |
| 1,025267238 | 0,91883 | 1,373636233 | 0,02857 | COL5A1   | collagen, type V, alpha 1                                          |
| 1,004167543 | 0,98925 | 1,426025717 | 0,02118 | COL6A1   | collagen, type VI, alpha 1                                         |
| 0,853226098 | 0,69428 | 1,688801775 | 0,00468 | COL6A2   | collagen, type VI, alpha 2                                         |
| 1,086734863 | 0,61784 | 1,440929749 | 0,00221 | COL6A2   | collagen, type VI, alpha 2                                         |
| 0,979420298 | 0,87918 | 1,330529041 | 0,04378 | COL6A3   | collagen, type VI, alpha 3                                         |
| 0,753145233 | 0,07557 | 1,234562607 | 0,03757 | COL7A1   | collagen, type VII, alpha 1                                        |
| 1,186736798 | 0,15089 | 1,32317144  | 0,00349 | COL9A2   | collagen, type IX, alpha 2                                         |
| 1,151887642 | 0,13158 | 1,279872414 | 0,0002  | COLEC11  | collectin sub-family member 11                                     |
| 0,898132373 | 0,52207 | 0,787307977 | 0,01579 | COMMMD2  | COMM domain containing 2                                           |
| 0,967947027 | 0,8889  | 1,163120042 | 0,00978 | COMMMD4  | COMM domain containing 4                                           |
| 1,009751298 | 0,93696 | 0,882702996 | 0,00862 | COMMMD5  | COMM domain containing 5                                           |
| 0,807760778 | 0,17562 | 0,71449707  | 0,00056 | COMMMD8  | COMM domain containing 8                                           |
| 1,139973273 | 0,29963 | 1,152686347 | 0,04061 | COPE     | coatomer protein complex, subunit epsilon                          |
| 0,76154437  | 0,07283 | 0,803850991 | 0,00515 | COP52    | COP9 constitutive photomorphogenic homolog subunit 2 (Arabidopsis) |
| 0,945402117 | 0,78308 | 0,785672517 | 0,00682 | COP52    | COP9 constitutive photomorphogenic homolog subunit 2 (Arabidopsis) |
| 0,84264683  | 0,19361 | 0,821880187 | 0,00054 | COP54    | COP9 constitutive photomorphogenic homolog subunit 4 (Arabidopsis) |
| 1,022428531 | 0,82635 | 0,91319825  | 0,02813 | COP56    | COP9 constitutive photomorphogenic homolog subunit 6 (Arabidopsis) |
| 0,995849753 | 0,97839 | 0,868742185 | 0,00937 | COP58    | COP9 constitutive photomorphogenic homolog subunit 8 (Arabidopsis) |
| 0,852634892 | 0,13506 | 0,870550563 | 0,01584 | COP58    | COP9 constitutive photomorphogenic homolog subunit 8 (Arabidopsis) |
| 1,099616149 | 0,31802 | 1,252664439 | 0,00178 | COP22    | coatomer protein complex, subunit zeta 2                           |
| 0,976708529 | 0,77697 | 0,885153765 | 0,04473 | COQ2     | coenzyme Q2 homolog, prenyltransferase (yeast)                     |
| 0,765778999 | 0,05906 | 0,803293997 | 0,00256 | COQ3     | coenzyme Q3 homolog, methyltransferase (S. cerevisiae)             |
| 1,0453601   | 0,78046 | 0,822450069 | 0,04518 | CORIN    | corin, serine peptidase                                            |
| 1,202469249 | 0,33599 | 1,268391399 | 0,00144 | CORO1B   | coronin, actin binding protein, 1B                                 |
| 0,867538687 | 0,55801 | 0,755759964 | 0,00275 | CORO1C   | coronin, actin binding protein, 1C                                 |
| 0,693515485 | 0,05318 | 0,758383773 | 0,00012 | CORO2A   | coronin, actin binding protein, 2A                                 |
| 1,111879158 | 0,18916 | 1,193335743 | 0,01845 | CORO6    | coronin 6                                                          |
| 0,905633983 | 0,54044 | 0,77916458  | 0,00077 | COX11    | COX11 cytochrome c oxidase assembly homolog (yeast)                |
| 1,102669163 | 0,60848 | 0,855002178 | 0,00589 | COX11    | COX11 cytochrome c oxidase assembly homolog (yeast)                |
| 1,041021598 | 0,85906 | 0,838568184 | 0,04286 | COX15    | COX15 homolog, cytochrome c oxidase assembly protein (yeast)       |
| 0,908148418 | 0,58475 | 0,730016005 | 0,00003 | COX16    | COX16 cytochrome c oxidase assembly homolog (S. cerevisiae)        |
| 0,69640574  | 0,21713 | 1,090507733 | 0,0445  | COX2     | cytochrome c oxidase subunit II                                    |
| 1,187559666 | 0,07199 | 1,396678532 | 0,00007 | COX4I2   | cytochrome c oxidase subunit IV isoform 2 (lung)                   |
| 0,993092495 | 0,9431  | 0,902500727 | 0,02332 | COX4NB   | COX4 neighbor                                                      |
| 1,100378609 | 0,41954 | 0,893165852 | 0,02732 | COX4NB   | COX4 neighbor                                                      |
| 0,987600861 | 0,89316 | 0,911933166 | 0,02052 | COX4NB   | COX4 neighbor                                                      |
| 0,951977908 | 0,55883 | 0,890692901 | 0,041   | COX5A    | cytochrome c oxidase subunit Va                                    |
| 0,922103118 | 0,39653 | 0,798298386 | 0,0012  | COX5A    | cytochrome c oxidase subunit Va                                    |
| 1,191682575 | 0,14572 | 1,202469249 | 0,00147 | COX6A2   | cytochrome c oxidase subunit VIa polypeptide 2                     |
| 1,062159186 | 0,56278 | 1,237132479 | 0,00324 | COX6B2   | cytochrome c oxidase subunit VIb polypeptide 2 (testis)            |
| 1,087488391 | 0,57659 | 1,413233644 | 0,00052 | COX7A1   | cytochrome c oxidase subunit VIIa polypeptide 1 (muscle)           |

|             |         |             |         |            |                                                                                          |
|-------------|---------|-------------|---------|------------|------------------------------------------------------------------------------------------|
| 0,946713631 | 0,78704 | 0,688725023 | 0,00017 | COX7B      | cytochrome c oxidase subunit VIIb                                                        |
| 1,232852325 | 0,28298 | 1,217566019 | 0,03252 | CP         | ceruloplasmin (ferroxidase)                                                              |
| 1,143930973 | 0,3331  | 1,341642225 | 0,03649 | CPA3       | carboxypeptidase A3 (mast cell)                                                          |
| 0,790589117 | 0,30412 | 0,785128119 | 0,03426 | CPE        | carboxypeptidase E                                                                       |
| 0,952637998 | 0,6702  | 1,158292806 | 0,00624 | CPEB1      | cytoplasmic polyadenylation element binding protein 1                                    |
| 1,0132569   | 0,88272 | 0,911301281 | 0,01918 | CPEB2      | cytoplasmic polyadenylation element binding protein 2                                    |
| 1,295940965 | 0,15027 | 1,366040257 | 0,0273  | CPLX1      | complexin 1                                                                              |
| 0,59295725  | 0,05083 | 0,624165274 | 0,00001 | CPM        | carboxypeptidase M                                                                       |
| 0,827023368 | 0,20221 | 0,763658749 | 0,00029 | CPM        | carboxypeptidase M                                                                       |
| 0,934327347 | 0,55506 | 0,852044095 | 0,00632 | CPM        | carboxypeptidase M                                                                       |
| 1,142346247 | 0,19091 | 1,157490217 | 0,02583 | CPN2       | carboxypeptidase N, polypeptide 2                                                        |
| 0,971307496 | 0,94394 | 0,800514811 | 0,00499 | CPNE3      | copine III                                                                               |
| 1,039579435 | 0,6425  | 1,167967395 | 0,02013 | CPNE6      | copine VI (neuronal)                                                                     |
| 0,938221197 | 0,63011 | 1,169587664 | 0,012   | CPNE7      | copine VII                                                                               |
| 1,094293701 | 0,6271  | 0,820741609 | 0,00382 | CPOX       | coproporphyrinogen oxidase                                                               |
| 1,071773463 | 0,42428 | 1,152686347 | 0,02165 | CPSF1      | cleavage and polyadenylation specific factor 1, 160kDa                                   |
| 0,782954296 | 0,25124 | 0,759435845 | 0,01342 | CPSF2      | cleavage and polyadenylation specific factor 2, 100kDa                                   |
| 0,918912883 | 0,52839 | 0,830470024 | 0,02066 | CPSF3L     | cleavage and polyadenylation specific factor 3-like                                      |
| 0,914465089 | 0,72226 | 1,2397077   | 0,00549 | CPSF3L     | cleavage and polyadenylation specific factor 3-like                                      |
| 0,901250463 | 0,43033 | 0,888226796 | 0,01393 | CPSF6      | cleavage and polyadenylation specific factor 6, 68kDa                                    |
| 1,021012126 | 0,8376  | 0,90312651  | 0,01698 | CPXCR1     | CPX chromosome region, candidate 1                                                       |
| 1,257013375 | 0,31556 | 1,464085696 | 0,0123  | CPXM1      | carboxypeptidase X (M14 family), member 1                                                |
| 1,03380736  | 0,87415 | 1,250062303 | 0,00862 | CPXM2      | carboxypeptidase X (M14 family), member 2                                                |
| 1,167158102 | 0,38329 | 1,257884972 | 0,04417 | CRABP1     | cellular retinoic acid binding protein 1                                                 |
| 1,062895674 | 0,49549 | 1,115739322 | 0,02227 | CRAMP1L    | Crm, cramped-like (Drosophila)                                                           |
| 1,074004472 | 0,37782 | 1,147107024 | 0,00857 | CRAT       | carnitine O-acetyltransferase                                                            |
| 0,873572896 | 0,09683 | 0,882091365 | 0,04382 | CRB3       | crumbs homolog 3 (Drosophila)                                                            |
| 0,84323111  | 0,30209 | 0,831045862 | 0,00249 | CRCP       | CGRP receptor component                                                                  |
| 0,986916546 | 0,96274 | 0,7944344   | 0,01254 | CREB1      | cAMP responsive element binding protein 1                                                |
| 0,836826243 | 0,42638 | 0,870550563 | 0,02495 | CREB1      | cAMP responsive element binding protein 1                                                |
| 0,867538687 | 0,49738 | 0,816203046 | 0,01095 | CREB1      | cAMP responsive element binding protein 1                                                |
| 1,073260286 | 0,72813 | 1,244011653 | 0,00058 | CREB3      | cAMP responsive element binding protein 3                                                |
| 1,111108729 | 0,40661 | 1,173648178 | 0,03812 | CREB3L1    | cAMP responsive element binding protein 3-like 1                                         |
| 0,826450318 | 0,25824 | 0,828170661 | 0,00184 | CREBBP     | CREB binding protein                                                                     |
| 0,991029563 | 0,97071 | 0,76101669  | 0,01779 | CRIM1      | cysteine rich transmembrane BMP regulator 1 (chordin-like)                               |
| 0,789493887 | 0,12736 | 0,894404902 | 0,02517 | CRIPAK     | cysteine-rich PAK1 inhibitor                                                             |
| 0,877821798 | 0,51343 | 0,8362464   | 0,0294  | CRIPT      | cysteine-rich PDZ-binding protein                                                        |
| 0,826450318 | 0,15387 | 0,803293997 | 0,00035 | CRIPT      | cysteine-rich PDZ-binding protein                                                        |
| 0,965936329 | 0,64105 | 1,121166078 | 0,02216 | CRISPLD2   | cysteine-rich secretory protein LCCL domain containing 2                                 |
| 0,674083866 | 0,22697 | 0,885767519 | 0,03441 | CRK        | v-crk sarcoma virus CT10 oncogene homolog (avian)                                        |
| 0,811689581 | 0,16362 | 0,788946841 | 0,00146 | CRK        | v-crk sarcoma virus CT10 oncogene homolog (avian)                                        |
| 0,610896551 | 0,06992 | 0,751059963 | 0,02057 | CRK        | v-crk sarcoma virus CT10 oncogene homolog (avian)                                        |
| 1,077733145 | 0,53373 | 0,811127156 | 0,04712 | CRLF3      | cytokine receptor-like factor 3                                                          |
| 0,96996191  | 0,77496 | 0,8362464   | 0,00549 | CRLS1      | cardiolipin synthase 1                                                                   |
| 1,062895674 | 0,59324 | 0,882091365 | 0,01396 | CRLS1      | cardiolipin synthase 1                                                                   |
| 0,89564567  | 0,39668 | 0,758383773 | 0,00014 | CRLS1      | cardiolipin synthase 1                                                                   |
| 1,044635763 | 0,58916 | 1,25353302  | 0,00239 | CRMP1      | collapsin response mediator protein 1                                                    |
| 0,79940583  | 0,18312 | 0,797192477 | 0,00989 | CRNDE      | colorectal neoplasia differentially expressed (non-protein coding)                       |
| 0,911301281 | 0,64077 | 0,847919965 | 0,02744 | CRNKL1     | crooked neck pre-mRNA splicing factor-like 1 (Drosophila)                                |
| 1,117287138 | 0,47782 | 1,20163605  | 0,00818 | CROCC      | ciliary rootlet coiled-coil, rootletin                                                   |
| 0,954621014 | 0,62303 | 1,143138335 | 0,03878 | CROCCP2    | ciliary rootlet coiled-coil, rootletin pseudogene 2                                      |
| 0,988970916 | 0,90877 | 1,129747215 | 0,01931 | CROCCP2    | ciliary rootlet coiled-coil, rootletin pseudogene 2                                      |
| 0,950000383 | 0,77258 | 0,77271055  | 0,00002 | CROT       | carnitine O-octanoyltransferase                                                          |
| 1,186736798 | 0,05611 | 1,159899655 | 0,01272 | CRTAC1     | cartilage acidic protein 1                                                               |
| 0,852044095 | 0,0598  | 0,871154192 | 0,04437 | CRTAP      | cartilage associated protein                                                             |
| 0,985549337 | 0,87955 | 1,104964485 | 0,03846 | CRTC1      | CREB regulated transcription coactivator 1                                               |
| 1,136816973 | 0,26468 | 1,285206337 | 0,00034 | CRTC1      | CREB regulated transcription coactivator 1                                               |
| 1,034547582 | 0,69897 | 1,208317843 | 0,00218 | CRX        | cone-rod homeobox                                                                        |
| 0,696888619 | 0,12677 | 0,67877249  | 0,00067 | CRY1       | cryptochrome 1 (photolyase-like)                                                         |
| 1,109569472 | 0,31198 | 1,130530567 | 0,02853 | CRYBB1     | crystallin, beta B1                                                                      |
| 0,810003474 | 0,31983 | 0,763658749 | 0,02263 | CRYZ       | crystallin, zeta (quinone reductase)                                                     |
| 0,632878297 | 0,06506 | 0,708578698 | 0,01187 | CRYZL1     | crystallin, zeta (quinone reductase)-like 1                                              |
| 0,85797053  | 0,3614  | 0,832775771 | 0,01778 | CRYZL1     | crystallin, zeta (quinone reductase)-like 1                                              |
| 0,832198735 | 0,1501  | 0,785128119 | 0,00523 | CSAD       | cysteine sulfenic acid decarboxylase                                                     |
| 0,639492791 | 0,36777 | 0,809442217 | 0,00629 | CSDA       | cold shock domain protein A                                                              |
| 0,754190038 | 0,29232 | 0,742261785 | 0,00209 | CSDA       | cold shock domain protein A                                                              |
| 0,578344092 | 0,05156 | 0,712518807 | 0,00011 | CSE1L      | CSE1 chromosome segregation 1-like (yeast)                                               |
| 1,214194884 | 0,1919  | 1,130530567 | 0,01874 | CSF1       | colony stimulating factor 1 (macrophage)                                                 |
| 1,257884972 | 0,08849 | 1,208317843 | 0,00092 | CSF1       | colony stimulating factor 1 (macrophage)                                                 |
| 1,335148303 | 0,08855 | 1,736280455 | 0,00002 | CSF1R      | colony stimulating factor 1 receptor                                                     |
| 1,120389214 | 0,2944  | 1,121943481 | 0,01673 | CSF2       | colony stimulating factor 2 (granulocyte-macrophage)                                     |
| 1,134455485 | 0,3236  | 1,367935304 | 0,00016 | CSGALNACT1 | chondroitin sulfate N-acetylgalactosaminyltransferase 1                                  |
| 1,035264924 | 0,75244 | 1,096571589 | 0,018   | CSHL1      | chorionic somatomammotropin hormone-like 1                                               |
| 0,978063473 | 0,79908 | 1,138394029 | 0,01639 | CSMD1      | CUB and Sushi multiple domains 1                                                         |
| 1,113421618 | 0,4315  | 1,170398641 | 0,02738 | CSMD2      | CUB and Sushi multiple domains 2                                                         |
| 1,137605228 | 0,11704 | 1,139973273 | 0,01187 | CSN3       | casein kappa                                                                             |
| 0,614719434 | 0,21965 | 0,564091069 | 0,00004 | CSNK1A1    | casein kinase 1, alpha 1                                                                 |
| 0,934327347 | 0,50513 | 0,853817714 | 0,01273 | CSNK1A1    | casein kinase 1, alpha 1                                                                 |
| 0,744883732 | 0,05105 | 0,813379198 | 0,03249 | CSNK1A1    | casein kinase 1, alpha 1                                                                 |
| 1,051901779 | 0,84743 | 1,223488041 | 0,00369 | CSNK1D     | casein kinase 1, delta                                                                   |
| 1,111879158 | 0,30075 | 1,163120042 | 0,03217 | CSNK1E     | casein kinase 1, epsilon                                                                 |
| 0,911301281 | 0,6571  | 0,868140228 | 0,00336 | CSNK1G1    | casein kinase 1, gamma 1                                                                 |
| 0,562919293 | 0,05275 | 0,711038705 | 0,00118 | CSNK1G1    | casein kinase 1, gamma 1                                                                 |
| 1,128182137 | 0,61878 | 0,810003474 | 0,00673 | CSNK1G3    | casein kinase 1, gamma 3                                                                 |
| 1,154285418 | 0,23032 | 1,232852325 | 0,01293 | CSPG5      | chondroitin sulfate proteoglycan 5 (neuroglycan C)                                       |
| 0,785128119 | 0,06156 | 0,791685866 | 0,00776 | CSPP1      | centrosome and spindle pole associated protein 1                                         |
| 0,840313752 | 0,31033 | 0,786762445 | 0,00376 | CSPP1      | centrosome and spindle pole associated protein 1                                         |
| 1,185914499 | 0,50233 | 0,816768991 | 0,0261  | CSPP1      | centrosome and spindle pole associated protein 1                                         |
| 0,972654947 | 0,88621 | 0,840313752 | 0,02798 | CSRNP2     | cysteine-serine-rich nuclear protein 2                                                   |
| 1,136029265 | 0,14482 | 1,127400412 | 0,03055 | CSRNP3     | cysteine-serine-rich nuclear protein 3                                                   |
| 1,329607108 | 0,11631 | 1,339783602 | 0,00048 | CSRNP1     | cysteine and glycine-rich protein 1                                                      |
| 0,823020345 | 0,09874 | 0,838568184 | 0,00241 | CST3       | cystatin C                                                                               |
| 1,011853201 | 0,89018 | 1,092020546 | 0,01717 | CST8       | cystatin 8 (cystatin-related epididymal specific)                                        |
| 0,833353207 | 0,06359 | 0,890692901 | 0,00758 | CSTA       | cystatin A (stefin A)                                                                    |
| 0,6341957   | 0,0752  | 0,701249625 | 0,00071 | CSTB       | cystatin B (stefin B)                                                                    |
| 0,93109482  | 0,7121  | 0,855595026 | 0,00866 | CSTF2      | cleavage stimulation factor, 3' pre-RNA, subunit 2, 64kDa                                |
| 1,179356592 | 0,07111 | 1,218410264 | 0,01003 | CTC1       | CTS telomere maintenance complex component 1                                             |
| 1,130530567 | 0,28405 | 1,189207115 | 0,00521 | CTDSP2     | CTD (carboxy-terminal domain, RNA polymerase II, polypeptide A) small phosphatase 2      |
| 0,878430468 | 0,54371 | 0,825877665 | 0,00554 | CTDSP2     | CTD (carboxy-terminal domain, RNA polymerase II, polypeptide A) small phosphatase like 2 |
| 1,519924856 | 0,06162 | 1,527317498 | 0,00572 | CTHRC1     | collagen triple helix repeat containing 1                                                |
| 1,097331938 | 0,52978 | 1,133669413 | 0,03924 | CTIF       | CBP80/20-dependent translation initiation factor                                         |
| 0,989666656 | 0,91542 | 1,135242102 | 0,02814 | CTLA4      | cytotoxic T-lymphocyte-associated protein 4                                              |
| 0,695440986 | 0,10782 | 0,829894586 | 0,01626 | CTNNA1     | catenin (cadherin-associated protein), alpha 1, 102kDa                                   |
| 0,811689581 | 0,107   | 0,828170661 | 0,0009  | CTNNA1     | catenin (cadherin-associated protein), alpha 1, 102kDa                                   |

|             |         |             |         |          |                                                                         |
|-------------|---------|-------------|---------|----------|-------------------------------------------------------------------------|
| 0,762072415 | 0,05835 | 0,824733549 | 0,00007 | CTNNA1   | catenin (cadherin-associated protein), alpha 1, 102kDa                  |
| 1,062895674 | 0,5857  | 1,165541198 | 0,0087  | CTNNA1   | catenin (cadherin-associated protein), alpha 1, 102kDa                  |
| 1,074749173 | 0,37939 | 1,186736798 | 0,02301 | CTNNA3   | catenin (cadherin-associated protein), alpha 3                          |
| 0,712025098 | 0,11033 | 0,765248385 | 0,00027 | CTNND1   | catenin (cadherin-associated protein), delta 1                          |
| 1,098854218 | 0,31392 | 1,106497353 | 0,03045 | CTNS     | cystinosin, lysosomal cystine transporter                               |
| 0,853817714 | 0,41198 | 0,740206649 | 0,00009 | CTR9     | Ctr9, Paf1/RNA polymerase II complex component, homolog (S. cerevisiae) |
| 1,089752112 | 0,38328 | 1,143138335 | 0,04894 | CTRB2    | chymotrypsinogen B2                                                     |
| 0,790589117 | 0,42896 | 1,155085785 | 0,00833 | CTSA     | cathepsin A                                                             |
| 1,175276328 | 0,44447 | 1,25353302  | 0,002   | CTS8     | cathepsin B                                                             |
| 1,210833084 | 0,10878 | 1,157490217 | 0,0296  | CTS8     | cathepsin B                                                             |
| 1,083725967 | 0,60387 | 1,216722359 | 0,01635 | CTSC     | cathepsin C                                                             |
| 1,194163187 | 0,34314 | 1,367935304 | 0,00524 | CTSD     | cathepsin D                                                             |
| 1,263127262 | 0,13371 | 1,393777239 | 0,00702 | CTSK     | cathepsin K                                                             |
| 1,196648963 | 0,10822 | 1,325007017 | 0,00249 | CTSL1P8  | cathepsin L1 pseudogene 8                                               |
| 1,180174343 | 0,54247 | 1,125838586 | 0,0268  | CTSO     | cathepsin O                                                             |
| 1,688801775 | 0,13219 | 1,797510253 | 0,00039 | CTSS     | cathepsin S                                                             |
| 1,247465572 | 0,08539 | 1,209994089 | 0,01387 | CTSW     | cathepsin W                                                             |
| 0,902500727 | 0,38496 | 0,828744904 | 0,025   | CTTN     | cortactin                                                               |
| 0,667111585 | 0,08207 | 0,632878297 | 0,00138 | CTTNBP2  | cortactin binding protein 2                                             |
| 1,042465761 | 0,7924  | 1,195819797 | 0,00019 | CUEDC2   | CUE domain containing 2                                                 |
| 0,995159722 | 0,98326 | 0,805524291 | 0,0086  | CUL2     | cullin 2                                                                |
| 0,884540435 | 0,49473 | 0,693034943 | 0,00048 | CUL3     | cullin 3                                                                |
| 0,955282936 | 0,70781 | 0,904379378 | 0,04238 | CUL3     | cullin 3                                                                |
| 0,712025098 | 0,11376 | 0,722465199 | 0,00033 | CUL4A    | cullin 4A                                                               |
| 0,849684999 | 0,45042 | 0,781869643 | 0,00046 | CUL5     | cullin 5                                                                |
| 0,945402117 | 0,80571 | 0,762072415 | 0,00072 | CUL5     | cullin 5                                                                |
| 0,947370071 | 0,6399  | 0,824733549 | 0,01191 | CUL5     | cullin 5                                                                |
| 1,215879283 | 0,08326 | 1,168777249 | 0,01576 | CUL7     | cullin 7                                                                |
| 0,95000383  | 0,47384 | 0,86934456  | 0,00753 | CUL7     | cullin 7                                                                |
| 1,164733586 | 0,1893  | 1,250062303 | 0,00046 | CUL7     | cullin 7                                                                |
| 1,20163605  | 0,20042 | 1,22603486  | 0,00067 | CUTA     | cutA divalent cation tolerance homolog (E. coli)                        |
| 0,636838738 | 0,05524 | 0,855002178 | 0,01117 | CUX1     | cut-like homeobox 1                                                     |
| 0,682546859 | 0,08374 | 0,701735863 | 0,00001 | CWC22    | CWC22 spliceosome-associated protein homolog (S. cerevisiae)            |
| 0,839149637 | 0,22938 | 0,734584317 | 0,00032 | CWC25    | CWC25 spliceosome-associated protein homolog (S. cerevisiae)            |
| 0,804966138 | 0,07885 | 0,789493887 | 0,00849 | CWC27    | CWC27 spliceosome-associated protein homolog (S. cerevisiae)            |
| 1,244874235 | 0,13791 | 1,196648963 | 0,02581 | CX3CL1   | chemokine (C-X3-C motif) ligand 1                                       |
| 0,758383773 | 0,39719 | 0,768970416 | 0,01334 | CXADR    | coxsaackie virus and adenovirus receptor                                |
| 0,596667872 | 0,06567 | 0,728499557 | 0,00104 | CXADR    | coxsaackie virus and adenovirus receptor                                |
| 0,749499801 | 0,27137 | 0,788946841 | 0,01329 | CXADR    | coxsaackie virus and adenovirus receptor                                |
| 1,207480591 | 0,13137 | 1,176906737 | 0,02431 | CXCL16   | chemokine (C-X-C motif) ligand 16                                       |
| 1,025267238 | 0,71662 | 1,116512962 | 0,01985 | CXCL2    | chemokine (C-X-C motif) ligand 2                                        |
| 1,22010051  | 0,08186 | 1,264879542 | 0,00129 | CXCR1    | chemokine (C-X-C motif) receptor 1                                      |
| 1,038859103 | 0,84099 | 0,85027416  | 0,0036  | CXorf23  | chromosome X open reading frame 23                                      |
| 1,145517898 | 0,11568 | 1,308578071 | 0,0001  | CXorf36  | chromosome X open reading frame 36                                      |
| 1,281647924 | 0,05719 | 1,167158102 | 0,00537 | CXorf36  | chromosome X open reading frame 36                                      |
| 1,057750964 | 0,66868 | 1,402499251 | 0,00307 | CXorf36  | chromosome X open reading frame 36                                      |
| 0,993781093 | 0,92189 | 0,851453708 | 0,01421 | CXorf38  | chromosome X open reading frame 38                                      |
| 0,84323111  | 0,30927 | 1,143930973 | 0,02177 | CXXC1    | CXXC finger protein 1                                                   |
| 0,955945318 | 0,55675 | 1,132098902 | 0,0065  | CXXC1P1  | CXXC finger protein 1 pseudogene 1                                      |
| 1,092777739 | 0,35689 | 1,155886707 | 0,00697 | CXXC4    | CXXC finger protein 4                                                   |
| 1,065846736 | 0,74101 | 1,328685814 | 0,00024 | CYB561D2 | cytochrome b-561 domain containing 2                                    |
| 1,003471749 | 0,9764  | 0,737134609 | 0,00394 | CYB5B    | cytochrome b5 type B (outer mitochondrial membrane)                     |
| 0,764718139 | 0,08548 | 0,915099168 | 0,04836 | CYB5D1   | cytochrome b5 domain containing 1                                       |
| 0,827596816 | 0,13528 | 0,779704843 | 0,00074 | CYB5R2   | cytochrome b5 reductase 2                                               |
| 2,161450804 | 0,07223 | 2,298989696 | 0,00001 | CYBA     | cytochrome b-245, alpha polypeptide                                     |
| 1,193335743 | 0,18908 | 1,264879542 | 0,00025 | CYBASC3  | cytochrome b, ascorbate dependent 3                                     |
| 1,00765376  | 0,93834 | 1,139973273 | 0,02624 | CYBB     | cytochrome b-245, beta polypeptide                                      |
| 0,78024548  | 0,38967 | 0,863938187 | 0,02267 | CYC1     | cytochrome c-1                                                          |
| 0,76154437  | 0,25731 | 0,678302164 | 0,00033 | CYCS     | cytochrome c, somatic                                                   |
| 1,164733586 | 0,05089 | 1,140763716 | 0,03017 | CYGB     | cytoglobin                                                              |
| 1,148698355 | 0,08973 | 1,164733586 | 0,01573 | CYHR1    | cysteine/histidine-rich 1                                               |
| 1,028826708 | 0,73638 | 1,159095952 | 0,04122 | CYLD     | cyliindromatosis (turban tumor syndrome)                                |
| 1,170398641 | 0,61095 | 0,790041312 | 0,02349 | CYLD     | cyliindromatosis (turban tumor syndrome)                                |
| 1,094293701 | 0,47309 | 1,131314463 | 0,00453 | CYMP     | chymosin pseudogene                                                     |
| 1,098092814 | 0,78447 | 0,808320869 | 0,03313 | CYorf15B | chromosome Y open reading frame 15B                                     |
| 1,085981856 | 0,40564 | 1,126619228 | 0,01463 | CYP11B1  | cytochrome P450, family 11, subfamily B, polypeptide 1                  |
| 1,004167543 | 0,96612 | 1,180174343 | 0,00462 | CYP1B1   | cytochrome P450, family 1, subfamily B, polypeptide 1                   |
| 1,437936533 | 0,06801 | 1,282536603 | 0,02126 | CYP1B1   | cytochrome P450, family 1, subfamily B, polypeptide 1                   |
| 0,973329374 | 0,79553 | 1,136029265 | 0,02383 | CYP27A1  | cytochrome P450, family 27, subfamily A, polypeptide 1                  |
| 1,10343374  | 0,27291 | 1,162314108 | 0,01045 | CYP2A6   | cytochrome P450, family 2, subfamily A, polypeptide 6                   |
| 1,098854218 | 0,36956 | 1,249196126 | 0,00019 | CYP2A6   | cytochrome P450, family 2, subfamily A, polypeptide 6                   |
| 1,123499903 | 0,2043  | 1,176906737 | 0,00188 | CYP2A7   | cytochrome P450, family 2, subfamily A, polypeptide 7                   |
| 0,813943185 | 0,06723 | 0,851453708 | 0,00188 | CYP2C19  | cytochrome P450, family 2, subfamily C, polypeptide 19                  |
| 0,792234811 | 0,0834  | 0,819036698 | 0,00787 | CYP3A4   | cytochrome P450, family 3, subfamily A, polypeptide 4                   |
| 1,274560627 | 0,05133 | 1,296839555 | 0,001   | CYP4A11  | cytochrome P450, family 4, subfamily A, polypeptide 11                  |
| 0,942131274 | 0,66411 | 1,280759861 | 0,0082  | CYP4B1   | cytochrome P450, family 4, subfamily B, polypeptide 1                   |
| 0,90062598  | 0,54446 | 0,834509281 | 0,00257 | CYTH3    | cytohesin 3                                                             |
| 1,23370717  | 0,09528 | 1,210833084 | 0,01415 | CYTH4    | cytohesin 4                                                             |
| 1,419123356 | 0,08379 | 1,31494276  | 0,00039 | CYR1     | cysteine/tyrosine-rich 1                                                |
| 1,082975046 | 0,50414 | 1,22010051  | 0,02714 | CYR1     | cysteine/tyrosine-rich 1                                                |
| 1,153485605 | 0,09334 | 1,134455485 | 0,0463  | DAB1     | disabled homolog 1 (Drosophila)                                         |
| 1,387992719 | 0,06398 | 1,47226862  | 0,00182 | DAB2     | disabled homolog 2, mitogen-responsive phosphoprotein (Drosophila)      |
| 1,147902414 | 0,09601 | 1,207480591 | 0,00189 | DAK      | dihydroxyacetone kinase 2 homolog (S. cerevisiae)                       |
| 1,058484395 | 0,67835 | 1,264879542 | 0,00042 | DAND5    | DAN domain family, member 5                                             |
| 1,316766922 | 0,16132 | 1,385109468 | 0,00004 | DAP      | death-associated protein                                                |
| 0,864537231 | 0,09893 | 0,923382311 | 0,04357 | DAP3     | death-associated protein 3                                              |
| 1,014662547 | 0,85797 | 1,217566019 | 0,00035 | DAPK1    | death-associated protein kinase 1                                       |
| 0,727994774 | 0,297   | 0,649319301 | 0,00244 | DAPP1    | dual adaptor of phosphotyrosine and 3-phosphoinositides                 |
| 0,752623374 | 0,05866 | 0,729004689 | 0,021   | DAPP1    | dual adaptor of phosphotyrosine and 3-phosphoinositides                 |
| 1,750539549 | 0,05776 | 0,651573575 | 0,00064 | DARS     | aspartyl-tRNA synthetase                                                |
| 1,082975046 | 0,31792 | 1,203303026 | 0,00667 | DARS2    | aspartyl-tRNA synthetase 2, mitochondrial                               |
| 0,918276162 | 0,25996 | 0,857376037 | 0,00574 | DAZAP1   | DAZ associated protein 1                                                |
| 0,803850991 | 0,12706 | 0,901875378 | 0,04632 | DAZAP1   | DAZ associated protein 1                                                |
| 0,93109482  | 0,35767 | 0,829894586 | 0,00287 | DAZAP2   | DAZ associated protein 2                                                |
| 1,065108203 | 0,57658 | 1,219255094 | 0,00672 | DBC1     | deleted in bladder cancer 1                                             |
| 0,908778116 | 0,64078 | 0,740719899 | 0,00032 | DBF4     | DBF4 homolog (S. cerevisiae)                                            |
| 1,00765376  | 0,93083 | 1,170398641 | 0,00844 | DBF4B    | DBF4 homolog B (S. cerevisiae)                                          |
| 1,058484395 | 0,56994 | 1,105730653 | 0,03343 | DBH-AS1  | DBH antisense RNA 1 (non-protein coding)                                |
| 0,991029563 | 0,93976 | 1,23370717  | 0,00352 | DBIL5P2  | diazepam binding inhibitor-like 5 pseudogene 2                          |
| 1,110338834 | 0,28815 | 1,241427492 | 0,00404 | DBN1     | drebrin 1                                                               |
| 0,923382311 | 0,50111 | 0,869947353 | 0,04657 | DBR1     | debranching enzyme homolog 1 (S. cerevisiae)                            |
| 0,843815796 | 0,37255 | 0,8362464   | 0,04262 | DBR1     | debranching enzyme homolog 1 (S. cerevisiae)                            |
| 0,835087919 | 0,47007 | 0,771105413 | 0,01431 | DBT      | dihydroliipoamide branched chain transacylase E2                        |
| 0,577142709 | 0,05858 | 0,807760778 | 0,00203 | DCAF10   | DBB1 and CUL4 associated factor 10                                      |

|             |         |             |         |         |                                                                              |
|-------------|---------|-------------|---------|---------|------------------------------------------------------------------------------|
| 0,859756486 | 0,32893 | 0,71946679  | 0,00371 | DCAF10  | DDB1 and CUL4 associated factor 10                                           |
| 0,883927531 | 0,61257 | 0,691116103 | 0,00056 | DCAF10  | DDB1 and CUL4 associated factor 10                                           |
| 1,030968319 | 0,79636 | 0,891928519 | 0,02389 | DCAF12  | DDB1 and CUL4 associated factor 12                                           |
| 0,859756486 | 0,20059 | 0,793333843 | 0,00018 | DCAF13  | DDB1 and CUL4 associated factor 13                                           |
| 0,789493887 | 0,38226 | 0,641712949 | 0       | DCAF13  | DDB1 and CUL4 associated factor 13                                           |
| 0,952637998 | 0,48776 | 0,920825697 | 0,01748 | DCAF41  | DDB1 and CUL4 associated factor 4-like 1                                     |
| 1,034547582 | 0,88349 | 1,251796459 | 0,00561 | DCAF7   | DDB1 and CUL4 associated factor 7                                            |
| 0,87175824  | 0,15604 | 0,773246337 | 0,00086 | DCAF8   | DDB1 and CUL4 associated factor 8                                            |
| 1,202469249 | 0,08681 | 1,255271991 | 0,00095 | DCAF8   | DDB1 and CUL4 associated factor 8                                            |
| 1,136816973 | 0,12377 | 1,165541198 | 0,01769 | DCAF8   | DDB1 and CUL4 associated factor 8                                            |
| 1,22010051  | 0,11211 | 1,237132479 | 0,01087 | DCC     | deleted in colorectal carcinoma                                              |
| 1,113421618 | 0,26735 | 1,147107024 | 0,01894 | DCD     | dermcidin                                                                    |
| 1,141554707 | 0,34596 | 1,355664327 | 0,00093 | DCHS1   | dachsous 1 (Drosophila)                                                      |
| 0,860352631 | 0,54485 | 0,750539549 | 0,00155 | DKC     | deoxycytidine kinase                                                         |
| 1,050444544 | 0,56957 | 1,099616149 | 0,04627 | DCLK2   | doublecortin-like kinase 2                                                   |
| 0,869947353 | 0,12271 | 0,891310496 | 0,0092  | DCLRE1B | DNA cross-link repair 1B                                                     |
| 1,069547088 | 0,74803 | 0,782411782 | 0,00146 | DCLRE1B | DNA cross-link repair 1B                                                     |
| 1,219255094 | 0,14523 | 1,398616083 | 0,00092 | DCN     | decorin                                                                      |
| 1,320422841 | 0,20309 | 1,282536603 | 0,01818 | DCN     | decorin                                                                      |
| 1,204137381 | 0,46543 | 1,447938172 | 0,00218 | DCN     | decorin                                                                      |
| 1,170398641 | 0,35475 | 1,45195828  | 0,00203 | DCN     | decorin                                                                      |
| 1,126619228 | 0,5601  | 1,125838586 | 0,04847 | DCPS    | decapping enzyme, scavenger                                                  |
| 1,142346247 | 0,14888 | 1,120389214 | 0,00454 | DCTN2   | dynactin 2 (p50)                                                             |
| 0,843815796 | 0,40102 | 0,811689581 | 0,00035 | DCTN4   | dynactin 4 (p62)                                                             |
| 0,885767519 | 0,12249 | 0,855002178 | 0,00515 | DCTN4   | dynactin 4 (p62)                                                             |
| 0,778085177 | 0,09665 | 0,803850991 | 0,02081 | DCTN6   | dynactin 6                                                                   |
| 0,940826108 | 0,85156 | 0,622437118 | 0,00001 | DCUN1D1 | DCN1, defective in cullin neddylation 1, domain containing 1 (S. cerevisiae) |
| 1,002081605 | 0,98987 | 0,849096246 | 0,02772 | DCUN1D1 | DCN1, defective in cullin neddylation 1, domain containing 1 (S. cerevisiae) |
| 0,942784536 | 0,68455 | 0,788946841 | 0,00054 | DCUN1D1 | DCN1, defective in cullin neddylation 1, domain containing 1 (S. cerevisiae) |
| 0,840313752 | 0,18129 | 0,839731493 | 0,00196 | DCUN1D2 | DCN1, defective in cullin neddylation 1, domain containing 2 (S. cerevisiae) |
| 0,740206649 | 0,16517 | 0,747942879 | 0,00184 | DCUN1D4 | DCN1, defective in cullin neddylation 1, domain containing 4 (S. cerevisiae) |
| 0,89564567  | 0,32813 | 0,860949188 | 0,00755 | DCUN1D5 | DCN1, defective in cullin neddylation 1, domain containing 5 (S. cerevisiae) |
| 0,808320869 | 0,09187 | 0,732550437 | 0,00178 | DCUN1D5 | DCN1, defective in cullin neddylation 1, domain containing 5 (S. cerevisiae) |
| 0,984184022 | 0,88312 | 0,754712984 | 0,00011 | DCUN1D5 | DCN1, defective in cullin neddylation 1, domain containing 5 (S. cerevisiae) |
| 1,074749173 | 0,41418 | 1,200803427 | 0,00459 | DDA1    | DET1 and DDB1 associated 1                                                   |
| 0,853817714 | 0,42657 | 0,813379198 | 0,00824 | DDHD2   | DDHD domain containing 2                                                     |
| 0,666187413 | 0,10508 | 0,714992493 | 0,00057 | DDI2    | DNA-damage inducible 1 homolog 2 (S. cerevisiae)                             |
| 1,046810282 | 0,66169 | 1,274560627 | 0,00019 | DDIT3   | DNA-damage-inducible transcript 3                                            |
| 1,077733145 | 0,6657  | 1,382232207 | 0,011   | DDR2    | discoidin domain receptor tyrosine kinase 2                                  |
| 1,249196126 | 0,20201 | 1,316766922 | 0,01587 | DDR2    | discoidin domain receptor tyrosine kinase 2                                  |
| 1,470187336 | 0,1352  | 1,293248932 | 0,0497  | DDR2    | discoidin domain receptor tyrosine kinase 2                                  |
| 1,118837101 | 0,35672 | 1,284315809 | 0,00107 | DDX11   | DEAD/H (Asp-Glu-Ala-Asp/His) box polypeptide 11                              |
| 1,072516617 | 0,45623 | 1,230291345 | 0,01188 | DDX11   | DEAD/H (Asp-Glu-Ala-Asp/His) box polypeptide 11                              |
| 1,156688184 | 0,11274 | 1,275444392 | 0,00651 | DDX11L2 | DEAD/H (Asp-Glu-Ala-Asp/His) box polypeptide 11 like 2                       |
| 0,994470169 | 0,96184 | 1,123499903 | 0,02504 | DDX17   | DEAD (Asp-Glu-Ala-Asp) box polypeptide 17                                    |
| 0,814507563 | 0,62363 | 0,746389192 | 0,03501 | DDX17   | DEAD (Asp-Glu-Ala-Asp) box polypeptide 17                                    |
| 0,755236293 | 0,24603 | 0,87417862  | 0,00432 | DDX18   | DEAD (Asp-Glu-Ala-Asp) box polypeptide 18                                    |
| 0,776468875 | 0,2077  | 0,787307977 | 0,00449 | DDX18   | DEAD (Asp-Glu-Ala-Asp) box polypeptide 18                                    |
| 0,856781955 | 0,07378 | 0,790589117 | 0,00009 | DDX19A  | DEAD (Asp-Glu-Ala-As) box polypeptide 19A                                    |
| 0,829319546 | 0,06645 | 0,837987135 | 0,01599 | DDX20   | DEAD (Asp-Glu-Ala-Asp) box polypeptide 20                                    |
| 0,91319825  | 0,65904 | 0,736113431 | 0,00006 | DDX20   | DEAD (Asp-Glu-Ala-Asp) box polypeptide 20                                    |
| 0,776468875 | 0,1518  | 0,70027816  | 0,00018 | DDX21   | DEAD (Asp-Glu-Ala-Asp) box polypeptide 21                                    |
| 0,843815796 | 0,33633 | 0,852044095 | 0,0416  | DDX24   | DEAD (Asp-Glu-Ala-Asp) box polypeptide 24                                    |
| 0,922742493 | 0,23636 | 1,091263877 | 0,0407  | DDX28   | DEAD (Asp-Glu-Ala-Asp) box polypeptide 28                                    |
| 1,0238469   | 0,81185 | 1,132883885 | 0,04326 | DDX31   | DEAD (Asp-Glu-Ala-Asp) box polypeptide 31                                    |
| 0,852634892 | 0,47745 | 0,70027816  | 0,00018 | DDX31   | DEAD (Asp-Glu-Ala-Asp) box polypeptide 31                                    |
| 0,948684315 | 0,85082 | 1,139183377 | 0,02906 | DDX39A  | DEAD (Asp-Glu-Ala-Asp) box polypeptide 39A                                   |
| 0,935623498 | 0,49582 | 0,87175824  | 0,01158 | DDX3Y   | DEAD (Asp-Glu-Ala-Asp) box polypeptide 3, Y-linked                           |
| 0,838568184 | 0,22227 | 0,696888619 | 0,0027  | DDX3Y   | DEAD (Asp-Glu-Ala-Asp) box polypeptide 3, Y-linked                           |
| 0,733566672 | 0,05106 | 0,893165852 | 0,0255  | DDX42   | DEAD (Asp-Glu-Ala-Asp) box polypeptide 42                                    |
| 0,942784536 | 0,74113 | 0,869947353 | 0,01562 | DDX46   | DEAD (Asp-Glu-Ala-Asp) box polypeptide 46                                    |
| 0,891310496 | 0,26141 | 0,887611337 | 0,03093 | DDX47   | DEAD (Asp-Glu-Ala-Asp) box polypeptide 47                                    |
| 0,774319028 | 0,06695 | 0,847332435 | 0,00759 | DDX49   | DEAD (Asp-Glu-Ala-Asp) box polypeptide 49                                    |
| 0,79774524  | 0,3298  | 0,760489377 | 0,00025 | DDX52   | DEAD (Asp-Glu-Ala-Asp) box polypeptide 52                                    |
| 0,733058379 | 0,12851 | 0,811689581 | 0,00021 | DDX55   | DEAD (Asp-Glu-Ala-Asp) box polypeptide 55                                    |
| 0,916368645 | 0,30266 | 0,867538687 | 0,01302 | DDX56   | DEAD (Asp-Glu-Ala-Asp) box polypeptide 56                                    |
| 0,96727633  | 0,82032 | 0,786762445 | 0,00036 | DDX59   | DEAD (Asp-Glu-Ala-Asp) box polypeptide 59                                    |
| 0,787853886 | 0,11225 | 0,771105413 | 0,02527 | DDX59   | DEAD (Asp-Glu-Ala-Asp) box polypeptide 59                                    |
| 0,93109482  | 0,63372 | 0,665725807 | 0,00849 | DDX60   | DEAD (Asp-Glu-Ala-Asp) box polypeptide 60                                    |
| 0,86154616  | 0,2589  | 0,716480825 | 0,00203 | DDX60L  | DEAD (Asp-Glu-Ala-Asp) box polypeptide 60-like                               |
| 1,114966219 | 0,45364 | 1,436940177 | 0,00055 | DEFB118 | defensin, beta 118                                                           |
| 1,172022284 | 0,16344 | 1,171210181 | 0,00128 | DEFB119 | defensin, beta 119                                                           |
| 1,035264924 | 0,72726 | 1,237990291 | 0,00678 | DEFB124 | defensin, beta 124                                                           |
| 0,593779833 | 0,10747 | 0,621144141 | 0,0182  | DEFB4A  | defensin, beta 4A                                                            |
| 0,537374586 | 0,18485 | 0,61813763  | 0,00074 | DEGS1   | degenerative spermatocyte homolog 1, lipid desaturase (Drosophila)           |
| 0,950659101 | 0,61097 | 0,816768991 | 0,02629 | DENND1A | DENN/MADD domain containing 1A                                               |
| 1,17609125  | 0,08392 | 1,21167266  | 0,01469 | DENND1A | DENN/MADD domain containing 1A                                               |
| 1,172834949 | 0,64355 | 0,78024548  | 0,02077 | DENND1B | DENN/MADD domain containing 1B                                               |
| 1,159095952 | 0,44716 | 0,762600827 | 0,00892 | DENND1B | DENN/MADD domain containing 1B                                               |
| 1,047536127 | 0,88034 | 0,674083866 | 0,0022  | DENND1B | DENN/MADD domain containing 1B                                               |
| 1,085229372 | 0,3467  | 1,113421618 | 0,00884 | DENND2A | DENN/MADD domain containing 2A                                               |
| 0,774319028 | 0,06176 | 0,87539133  | 0,01794 | DENND2D | DENN/MADD domain containing 2D                                               |
| 1,173648178 | 0,34118 | 1,184271612 | 0,00074 | DENND4B | DENN/MADD domain containing 4B                                               |
| 0,652025368 | 0,0515  | 0,751580739 | 0,00299 | DENND4C | DENN/MADD domain containing 4C                                               |
| 1,043188594 | 0,74607 | 0,864537231 | 0,02632 | DENND4C | DENN/MADD domain containing 4C                                               |
| 1,359428242 | 0,08104 | 1,261377409 | 0,00136 | DENND5A | DENN/MADD domain containing 5A                                               |
| 0,680657058 | 0,06355 | 0,747424624 | 0,00016 | DENR    | density-regulated protein                                                    |
| 0,924663278 | 0,28257 | 0,828744904 | 0,00855 | DENR    | density-regulated protein                                                    |
| 0,721964598 | 0,07614 | 0,673616788 | 0,01328 | DENR    | density-regulated protein                                                    |
| 1,047536127 | 0,6667  | 1,153485605 | 0,03569 | DEPDC5  | DEP domain containing 5                                                      |
| 0,868742185 | 0,57071 | 0,709070018 | 0,0096  | DEPDC7  | DEP domain containing 7                                                      |
| 0,820172911 | 0,21118 | 0,736623843 | 0,0001  | DERA    | deoxyribose-phosphate aldolase (putative)                                    |
| 1,040300267 | 0,85901 | 1,223488041 | 0,00555 | DGAT1   | diacylglycerol O-acyltransferase 1                                           |
| 1,184271612 | 0,05241 | 1,187559666 | 0,00344 | DGCR14  | DiGeorge syndrome critical region gene 14                                    |
| 1,068805991 | 0,37545 | 1,197478705 | 0,00242 | DGCR2   | DiGeorge syndrome critical region gene 2                                     |
| 1,076986376 | 0,39044 | 1,097331938 | 0,04571 | DGCR5   | DiGeorge syndrome critical region gene 5 (non-protein coding)                |
| 0,965267025 | 0,72815 | 1,128182137 | 0,00702 | DGCR9   | DiGeorge syndrome critical region gene 9                                     |
| 0,610050255 | 0,13818 | 0,779704843 | 0,03263 | DGKA    | diacylglycerol kinase, alpha 80kDa                                           |
| 1,273677475 | 0,08487 | 1,343503426 | 0,00126 | DGKD    | diacylglycerol kinase, delta 130kDa                                          |
| 1,067325338 | 0,48297 | 1,180992661 | 0,00256 | DHDDS   | dehydrodolichyl diphosphate synthase                                         |
| 0,718470088 | 0,07739 | 0,863339559 | 0,01948 | DHFR    | dihydrofolate reductase                                                      |
| 0,746389192 | 0,13834 | 0,775930854 | 0,00061 | DHFR    | dihydrofolate reductase                                                      |
| 0,971307496 | 0,77804 | 0,921464186 | 0,04174 | DHODH   | dihydroorotate dehydrogenase (quinone)                                       |
| 0,876605721 | 0,49352 | 1,189207115 | 0,00777 | DHPS    | deoxyhypusine synthase                                                       |

|             |         |             |         |             |                                                                                   |
|-------------|---------|-------------|---------|-------------|-----------------------------------------------------------------------------------|
| 0,983502074 | 0,91707 | 1,126619228 | 0,01846 | DHPS        | deoxyhypusine synthase                                                            |
| 0,877213549 | 0,62643 | 1,187559666 | 0,00556 | DHPS        | deoxyhypusine synthase                                                            |
| 1,344434994 | 0,0658  | 1,504203751 | 0,00609 | DHRS9       | dehydrogenase/reductase (SDR family) member 9                                     |
| 1,167158102 | 0,48456 | 1,487613762 | 0,01044 | DHRS9       | dehydrogenase/reductase (SDR family) member 9                                     |
| 1,155085785 | 0,48845 | 1,559409685 | 0,00714 | DHRS9       | dehydrogenase/reductase (SDR family) member 9                                     |
| 1,171210181 | 0,10695 | 1,162314108 | 0,01589 | DHRSX       | dehydrogenase/reductase (SDR family) X-linked                                     |
| 0,832775771 | 0,45912 | 1,190856849 | 0,04746 | DHTKD1      | dehydrogenase E1 and transketolase domain containing 1                            |
| 0,647521499 | 0,05903 | 0,760489377 | 0,00002 | DHX29       | DEAH (Asp-Glu-Ala-His) box polypeptide 29                                         |
| 1,019597683 | 0,89946 | 0,839731493 | 0,04379 | DHX30       | DEAH (Asp-Glu-Ala-His) box polypeptide 30                                         |
| 0,818469182 | 0,06743 | 0,852634892 | 0,03909 | DHX33       | DEAH (Asp-Glu-Ala-His) box polypeptide 33                                         |
| 1,030968319 | 0,78991 | 1,153485605 | 0,0337  | DHX34       | DEAH (Asp-Glu-Ala-His) box polypeptide 34                                         |
| 1,2397077   | 0,10974 | 1,356604327 | 0       | DHX35       | DEAH (Asp-Glu-Ala-His) box polypeptide 35                                         |
| 1,068065408 | 0,51719 | 1,270150983 | 0,01196 | DHX35       | DEAH (Asp-Glu-Ala-His) box polypeptide 35                                         |
| 0,937571096 | 0,60488 | 0,849096246 | 0,02567 | DHX36       | DEAH (Asp-Glu-Ala-His) box polypeptide 36                                         |
| 0,8362464   | 0,58136 | 0,750019495 | 0,00027 | DHX36       | DEAH (Asp-Glu-Ala-His) box polypeptide 36                                         |
| 0,881480158 | 0,76265 | 0,775393206 | 0,00007 | DHX36       | DEAH (Asp-Glu-Ala-His) box polypeptide 36                                         |
| 0,733058379 | 0,07902 | 0,742261785 | 0,00546 | DHX40       | DEAH (Asp-Glu-Ala-His) box polypeptide 40                                         |
| 0,757333158 | 0,1557  | 0,774319028 | 0,02399 | DHX40       | DEAH (Asp-Glu-Ala-His) box polypeptide 40                                         |
| 0,777546036 | 0,09428 | 0,917004043 | 0,02969 | DHX8        | DEAH (Asp-Glu-Ala-His) box polypeptide 8                                          |
| 0,815072332 | 0,05051 | 0,836826243 | 0,00564 | DHX9        | DEAH (Asp-Glu-Ala-His) box polypeptide 9                                          |
| 0,947370071 | 0,40873 | 0,899378312 | 0,01867 | DIAPH1      | diaphanous homolog 1 (Drosophila)                                                 |
| 0,713012859 | 0,08344 | 0,816768991 | 0,00058 | DIAPH1      | diaphanous homolog 1 (Drosophila)                                                 |
| 0,83566959  | 0,24715 | 0,885767519 | 0,03668 | DIAPH1      | diaphanous homolog 1 (Drosophila)                                                 |
| 0,557096825 | 0,20408 | 0,542238704 | 0,00024 | DICER1      | dicer 1, ribonuclease type III                                                    |
| 0,817902059 | 0,30233 | 0,828744904 | 0,0023  | DICER1      | dicer 1, ribonuclease type III                                                    |
| 0,944747041 | 0,89244 | 0,684441907 | 0,00099 | DICER1      | dicer 1, ribonuclease type III                                                    |
| 0,765248385 | 0,06805 | 0,709561678 | 0,0003  | DIDO1       | death inducer-obliterator 1                                                       |
| 0,854409741 | 0,51013 | 0,76418826  | 0,00104 | DIEXF       | digestive organ expansion factor homolog (zebrafish)                              |
| 0,884540435 | 0,39944 | 0,795536484 | 0,00023 | DIMT1       | DIM1 dimethyladenosine transferase 1 homolog (S. cerevisiae)                      |
| 0,708578698 | 0,08367 | 0,71946679  | 0,01025 | DIMT1       | DIM1 dimethyladenosine transferase 1 homolog (S. cerevisiae)                      |
| 0,939522749 | 0,66427 | 0,85086373  | 0,0043  | DIMT1       | DIM1 dimethyladenosine transferase 1 homolog (S. cerevisiae)                      |
| 0,584388624 | 0,05072 | 0,616853585 | 0,01106 | DIO2        | deiodinase, iodothyronine, type II                                                |
| 0,920187651 | 0,40845 | 1,182631    | 0,01826 | DIO30S      | DIO3 opposite strand/antisense RNA (non-protein coding)                           |
| 0,987600861 | 0,84538 | 1,119612889 | 0,00887 | DIP2A       | DIP2 disco-interacting protein 2 homolog A (Drosophila)                           |
| 1,169587664 | 0,08706 | 1,260503392 | 0,00424 | DIP2A       | DIP2 disco-interacting protein 2 homolog A (Drosophila)                           |
| 0,801069878 | 0,09193 | 0,840313752 | 0,00425 | DIP2A       | DIP2 disco-interacting protein 2 homolog A (Drosophila)                           |
| 0,995159722 | 0,95752 | 0,899378312 | 0,0254  | DIRC2       | disrupted in renal carcinoma 2                                                    |
| 0,989656656 | 0,96532 | 0,74277646  | 0,03259 | DIS3        | DIS3 mitotic control homolog (S. cerevisiae)                                      |
| 0,729004689 | 0,07461 | 0,770037174 | 0,00151 | DIS3L2      | DIS3 mitotic control homolog (S. cerevisiae)-like 2                               |
| 0,891928519 | 0,58923 | 0,757333158 | 0,00526 | DIS3L2      | DIS3 mitotic control homolog (S. cerevisiae)-like 2                               |
| 0,90000193  | 0,33647 | 0,86934456  | 0,01238 | DISP1       | dispatched homolog 1 (Drosophila)                                                 |
| 0,733566672 | 0,09772 | 0,746389192 | 0,00183 | DKC1        | dyskeratosis congenita 1, dyskerin                                                |
| 0,800514811 | 0,10573 | 0,756283999 | 0,00004 | DKC1        | dyskeratosis congenita 1, dyskerin                                                |
| 0,735093668 | 0,16814 | 0,768437591 | 0,00026 | DKC1        | dyskeratosis congenita 1, dyskerin                                                |
| 1,054091423 | 0,61828 | 1,23370717  | 0,00046 | DKFZP434A06 | hypothetical LOC26102                                                             |
| 1,146312186 | 0,14859 | 1,108032348 | 0,03497 | DKFZP434C15 | DKFZP434C153 protein                                                              |
| 1,091263877 | 0,47351 | 1,179356592 | 0,00547 | DKFZP434E11 | hypothetical DKFZP434E1119                                                        |
| 0,809442217 | 0,39034 | 0,680185426 | 0,00651 | DKK3        | dickkopf homolog 3 (Xenopus laevis)                                               |
| 0,788946841 | 0,20339 | 0,807201075 | 0,04653 | DLAT        | dihydroliipoamide S-acetyltransferase                                             |
| 0,802737389 | 0,29141 | 0,773246337 | 0,00209 | DLAT        | dihydroliipoamide S-acetyltransferase                                             |
| 0,997922719 | 0,98218 | 1,120389214 | 0,02355 | DLC1        | deleted in liver cancer 1                                                         |
| 1,301341855 | 0,05619 | 1,367935304 | 0,00265 | DLC1        | deleted in liver cancer 1                                                         |
| 0,752101876 | 0,10804 | 0,709561678 | 0,00124 | DLD         | dihydroliipoamide dehydrogenase                                                   |
| 0,784040454 | 0,20063 | 0,652929894 | 0,00048 | DLD         | dihydroliipoamide dehydrogenase                                                   |
| 1,135242102 | 0,32015 | 1,400556321 | 0,00004 | DLEC1       | deleted in lung and esophageal cancer 1                                           |
| 0,787307977 | 0,05534 | 0,798298386 | 0,00061 | DLEU1       | deleted in lymphocytic leukemia 1 (non-protein coding)                            |
| 1,139973273 | 0,32325 | 1,117287138 | 0,03289 | DLEU2       | deleted in lymphocytic leukemia 2 (non-protein coding)                            |
| 0,741233505 | 0,1817  | 0,826450318 | 0,01913 | DLG1        | discs, large homolog 1 (Drosophila)                                               |
| 0,90000193  | 0,42392 | 0,772175133 | 0,00174 | DLG2        | discs, large homolog 2 (Drosophila)                                               |
| 1,074004472 | 0,54816 | 1,131314463 | 0,04054 | DLGAP1      | discs, large (Drosophila) homolog-associated protein 1                            |
| 1,112650121 | 0,20244 | 1,125058485 | 0,00454 | DLGAP2      | discs, large (Drosophila) homolog-associated protein 2                            |
| 1,147902414 | 0,14976 | 1,104198847 | 0,02133 | DLL3        | delta-like 3 (Drosophila)                                                         |
| 1,252664439 | 0,05129 | 1,21335356  | 0,00343 | DLL4        | delta-like 4 (Drosophila)                                                         |
| 1,033114388 | 0,85432 | 1,25092908  | 0,00806 | DLST        | dihydroliipoamide S-succinyltransferase (E2 component of 2-oxo-glutarate complex) |
| 0,942784536 | 0,55652 | 1,155085785 | 0,02011 | DLX1        | distal-less homeobox 1                                                            |
| 1,008352455 | 0,91543 | 1,108800644 | 0,03649 | DLX6        | distal-less homeobox 6                                                            |
| 0,996540263 | 0,972   | 1,210833084 | 0,00571 | DMBT1       | deleted in malignant brain tumors 1                                               |
| 0,746906729 | 0,17824 | 0,744838732 | 0,00144 | DMXL1       | Dmx-like 1                                                                        |
| 1,051172909 | 0,64889 | 1,299539062 | 0,00012 | DMXL2       | Dmx-like 2                                                                        |
| 1,227735684 | 0,08317 | 1,339783602 | 0,00278 | DNAAF1      | dynein, axonemal, assembly factor 1                                               |
| 0,964598185 | 0,84093 | 0,79940583  | 0,03022 | DNAAF2      | dynein, axonemal, assembly factor 2                                               |
| 1,155886707 | 0,12336 | 1,252664439 | 0,00001 | DNAH1       | dynein, axonemal, heavy chain 1                                                   |
| 0,980779004 | 0,80859 | 1,097331938 | 0,02958 | DNAH1       | dynein, axonemal, heavy chain 1                                                   |
| 1,188383105 | 0,2092  | 1,188383105 | 0,00527 | DNAH1       | dynein, axonemal, heavy chain 1                                                   |
| 1,086734863 | 0,38938 | 1,183451022 | 0,00632 | DNAH1       | dynein, axonemal, heavy chain 1                                                   |
| 1,057018041 | 0,46127 | 1,111879158 | 0,00506 | DNAH3       | dynein, axonemal, heavy chain 3                                                   |
| 1,105730653 | 0,34963 | 1,186736798 | 0,02849 | DNAH6       | dynein, axonemal, heavy chain 6                                                   |
| 1,079228237 | 0,31048 | 1,172834949 | 0,00731 | DNAI1       | dynein, axonemal, intermediate chain 1                                            |
| 0,935623498 | 0,73796 | 0,880259014 | 0,01968 | DNAJ1       | DnaJ (Hsp40) homolog, subfamily A, member 1                                       |
| 0,895025071 | 0,4835  | 0,76684133  | 0,00935 | DNAJ2       | DnaJ (Hsp40) homolog, subfamily A, member 2                                       |
| 1,094293701 | 0,72155 | 1,144724161 | 0,01849 | DNAJ11      | DnaJ (Hsp40) homolog, subfamily B, member 11                                      |
| 1,035982764 | 0,71474 | 1,131314463 | 0,00964 | DNAJ13      | DnaJ (Hsp40) homolog, subfamily B, member 13                                      |
| 0,938871747 | 0,80535 | 0,720464874 | 0,00003 | DNAJ14      | DnaJ (Hsp40) homolog, subfamily B, member 14                                      |
| 0,873572896 | 0,72248 | 0,697371833 | 0,00439 | DNAJ14      | DnaJ (Hsp40) homolog, subfamily B, member 14                                      |
| 1,109569472 | 0,1941  | 1,120389214 | 0,02272 | DNAJB8-AS1  | DNAJB8 antisense RNA 1 (non-protein coding)                                       |
| 1,159899655 | 0,2026  | 1,186736798 | 0,02643 | DNAJ1       | DnaJ (Hsp40) homolog, subfamily C, member 1                                       |
| 1,909242028 | 0,10661 | 1,370782805 | 0,00298 | DNAJ1       | DnaJ (Hsp40) homolog, subfamily C, member 1                                       |
| 1,638073396 | 0,22304 | 1,218410264 | 0,01394 | DNAJ1       | DnaJ (Hsp40) homolog, subfamily C, member 1                                       |
| 0,997922719 | 0,97989 | 0,90062598  | 0,03064 | DNAJ12      | DnaJ (Hsp40) homolog, subfamily C, member 12                                      |
| 1,114193651 | 0,20673 | 1,138394029 | 0,04676 | DNAJ16      | DnaJ (Hsp40) homolog, subfamily C, member 16                                      |
| 1,084477409 | 0,24093 | 1,215036792 | 0,01089 | DNAJ18      | DnaJ (Hsp40) homolog, subfamily C, member 18                                      |
| 1,286989247 | 0,07325 | 1,251796459 | 0,00493 | DNAJ18      | DnaJ (Hsp40) homolog, subfamily C, member 18                                      |
| 0,844400887 | 0,13952 | 0,86934456  | 0,04325 | DNAJ19      | DnaJ (Hsp40) homolog, subfamily C, member 19                                      |
| 0,759962428 | 0,22054 | 0,662044455 | 0,00001 | DNAJ21      | DnaJ (Hsp40) homolog, subfamily C, member 21                                      |
| 0,646624466 | 0,09353 | 0,680657058 | 0,00047 | DNAJ21      | DnaJ (Hsp40) homolog, subfamily C, member 21                                      |
| 0,880259014 | 0,24794 | 0,819604608 | 0,00155 | DNAJ21      | DnaJ (Hsp40) homolog, subfamily C, member 21                                      |
| 0,932386486 | 0,33931 | 0,8962667   | 0,02523 | DNAJ21      | DnaJ (Hsp40) homolog, subfamily C, member 21                                      |
| 0,789493887 | 0,05677 | 0,816768991 | 0,00468 | DNAJ21      | DnaJ (Hsp40) homolog, subfamily C, member 21                                      |
| 1,066585781 | 0,47969 | 1,152686347 | 0,00713 | DNAJ22      | DnaJ (Hsp40) homolog, subfamily C, member 22                                      |
| 0,85027416  | 0,14424 | 0,881480158 | 0,01961 | DNAJ24      | DnaJ (Hsp40) homolog, subfamily C, member 24                                      |
| 0,862143545 | 0,2138  | 0,727490342 | 0,00123 | DNAJ24      | DnaJ (Hsp40) homolog, subfamily C, member 24                                      |
| 0,933032992 | 0,77505 | 0,780786493 | 0,00164 | DNAJ27      | DnaJ (Hsp40) homolog, subfamily C, member 27                                      |
| 0,991029563 | 0,92154 | 0,91383145  | 0,04478 | DNAJ27      | DnaJ (Hsp40) homolog, subfamily C, member 27                                      |
| 0,884540435 | 0,49417 | 0,827596816 | 0,00971 | DNAJ27      | DnaJ (Hsp40) homolog, subfamily C, member 27                                      |

|             |         |             |         |             |                                                                         |
|-------------|---------|-------------|---------|-------------|-------------------------------------------------------------------------|
| 0,942131274 | 0,402   | 0,890075733 | 0,00527 | DNAJC28     | DnaJ (Hsp40) homolog, subfamily C, member 28                            |
| 1,162314108 | 0,71024 | 0,644834125 | 0,00023 | DNAJC3      | DnaJ (Hsp40) homolog, subfamily C, member 3                             |
| 1,257884972 | 0,16068 | 1,172022284 | 0,02777 | DNAJC3      | DnaJ (Hsp40) homolog, subfamily C, member 3                             |
| 1,092777739 | 0,47242 | 1,132883885 | 0,0151  | DNAJC30     | DnaJ (Hsp40) homolog, subfamily C, member 30                            |
| 1,024556823 | 0,93206 | 1,304954948 | 0,00051 | DNAJC4      | DnaJ (Hsp40) homolog, subfamily C, member 4                             |
| 1,068805991 | 0,79441 | 1,297738767 | 0,00917 | DNAJC4      | DnaJ (Hsp40) homolog, subfamily C, member 4                             |
| 1,132098902 | 0,19395 | 1,163120042 | 0,01433 | DNAJC5G     | DnaJ (Hsp40) homolog, subfamily C, member 5 gamma                       |
| 0,905633983 | 0,37102 | 0,815637493 | 0,01549 | DNAJC7      | DnaJ (Hsp40) homolog, subfamily C, member 7                             |
| 0,951977908 | 0,6923  | 1,284315809 | 0,00565 | DNAJC7      | DnaJ (Hsp40) homolog, subfamily C, member 7                             |
| 0,971307496 | 0,74962 | 0,906890329 | 0,0187  | DNAJC8      | DnaJ (Hsp40) homolog, subfamily C, member 8                             |
| 0,715984371 | 0,08037 | 0,655196702 | 0,00008 | DNAJC9      | DnaJ (Hsp40) homolog, subfamily C, member 9                             |
| 1,076240125 | 0,55525 | 1,163120042 | 0,00951 | DNASE1      | deoxyribonuclease I                                                     |
| 0,958599438 | 0,84565 | 1,104964485 | 0,03135 | DNASE1L1    | deoxyribonuclease I-like 1                                              |
| 0,974679631 | 0,88833 | 1,28788163  | 0,01054 | DNASE1L3    | deoxyribonuclease I-like 3                                              |
| 1,061423209 | 0,73924 | 1,199139914 | 0,00173 | DNASE2      | deoxyribonuclease II, lysosomal                                         |
| 1,065846736 | 0,77871 | 1,248330549 | 0,00925 | DNASE2      | deoxyribonuclease II, lysosomal                                         |
| 0,749499801 | 0,54209 | 0,551334582 | 0,00579 | DNER        | delta/notch-like EGF repeat containing                                  |
| 1,059952783 | 0,54731 | 1,223488041 | 0,01045 | DNH1        | dynein heavy chain domain 1                                             |
| 0,729510172 | 0,05792 | 0,811127156 | 0,04433 | DNM1L       | dynamin 1-like                                                          |
| 0,730522189 | 0,11663 | 0,784584098 | 0,0002  | DNM1L       | dynamin 1-like                                                          |
| 1,236275261 | 0,05859 | 1,180992661 | 0,00442 | DNM2        | dynamin 2                                                               |
| 0,754712984 | 0,11967 | 0,886381699 | 0,02839 | DNMBP       | dynamin binding protein                                                 |
| 0,993092495 | 0,93071 | 1,111879158 | 0,04388 | DNMT3A      | DNA (cytosine-5-)-methyltransferase 3 alpha                             |
| 0,91319825  | 0,3657  | 0,893165852 | 0,02741 | DNPEP       | aspartyl aminopeptidase                                                 |
| 0,993092495 | 0,9545  | 0,901250463 | 0,02541 | DNTT        | deoxynucleotidyltransferase, terminal                                   |
| 1,171210181 | 0,28671 | 1,22858698  | 0,01269 | DOC2B       | double C2-like domains, beta                                            |
| 0,837406488 | 0,14834 | 0,739693755 | 0,00012 | DOCK1       | dedicator of cytokinesis 1                                              |
| 1,046810282 | 0,61238 | 1,114193651 | 0,02233 | DOCK3       | dedicator of cytokinesis 3                                              |
| 0,711531731 | 0,0751  | 0,783497187 | 0,00263 | DOCK7       | dedicator of cytokinesis 7                                              |
| 1,325007017 | 0,08271 | 1,4054187   | 0,00197 | DOCK8       | dedicator of cytokinesis 8                                              |
| 0,625031151 | 0,05436 | 0,647072827 | 0,00188 | DOCK9       | dedicator of cytokinesis 9                                              |
| 1,040300267 | 0,65731 | 1,161508732 | 0,02024 | DOCK9       | dedicator of cytokinesis 9                                              |
| 0,887611337 | 0,62686 | 0,713012859 | 0,00039 | DOCK9       | dedicator of cytokinesis 9                                              |
| 1,147107024 | 0,20341 | 1,150291893 | 0,01966 | DOK1        | docking protein 1, 62kDa (downstream of tyrosine kinase 1)              |
| 1,221793102 | 0,0666  | 1,304050735 | 0,00343 | DOK2        | docking protein 2, 62kDa                                                |
| 0,810003474 | 0,10014 | 0,831622098 | 0,03281 | DOK4        | docking protein 4                                                       |
| 1,262252032 | 0,06436 | 1,139973273 | 0,02495 | DOK5        | docking protein 5                                                       |
| 1,169587664 | 0,09045 | 1,143138335 | 0,00399 | DOK7        | docking protein 7                                                       |
| 1,059952783 | 0,3998  | 1,134455485 | 0,00838 | DOLPP1      | dolichyl pyrophosphate phosphatase 1                                    |
| 1,118061851 | 0,3986  | 1,366987452 | 0,00002 | DOM3Z       | dom-3 homolog Z (C. elegans)                                            |
| 1,167967395 | 0,05038 | 1,214194884 | 0,00121 | DOM3Z       | dom-3 homolog Z (C. elegans)                                            |
| 0,862143545 | 0,27157 | 0,847332435 | 0,0223  | DONSON      | downstream neighbor of SON                                              |
| 0,816768991 | 0,08551 | 0,786217292 | 0,02231 | DOPEY1      | dopey family member 1                                                   |
| 0,743806881 | 0,07115 | 0,81056512  | 0,01671 | DOPEY1      | dopey family member 1                                                   |
| 0,880869374 | 0,53027 | 0,846158597 | 0,03861 | DOPEY2      | dopey family member 2                                                   |
| 1,002776436 | 0,98325 | 0,816768991 | 0,00806 | DOT1L       | DOT1-like, histone H3 methyltransferase (S. cerevisiae)                 |
| 0,919550046 | 0,52425 | 0,786217292 | 0,00429 | DPH3        | DPH3, KTI11 homolog (S. cerevisiae)                                     |
| 0,856781955 | 0,47878 | 0,812815602 | 0,00823 | DPH3        | DPH3, KTI11 homolog (S. cerevisiae)                                     |
| 0,922742493 | 0,41042 | 0,866937564 | 0,00213 | DPH3P1      | DPH3, KTI11 homolog (S. cerevisiae) pseudogene 1                        |
| 0,744838732 | 0,13878 | 0,859756486 | 0,00321 | DPH5        | DPH5 homolog (S. cerevisiae)                                            |
| 0,840896415 | 0,21693 | 0,733058379 | 0,00061 | DPM1        | dolichyl-phosphate mannosyltransferase polypeptide 1, catalytic subunit |
| 1,207480591 | 0,2154  | 1,208317843 | 0,00113 | DPM3        | dolichyl-phosphate mannosyltransferase polypeptide 3                    |
| 0,995849753 | 0,96911 | 1,21335356  | 0,00503 | DPP4        | dipeptidyl-peptidase 4                                                  |
| 1,264879542 | 0,23136 | 1,277213759 | 0,01832 | DPP7        | dipeptidyl-peptidase 7                                                  |
| 0,880869374 | 0,16677 | 0,856188285 | 0,02547 | DR1         | down-regulator of transcription 1, TBP-binding (negative cofactor 2)    |
| 0,783497187 | 0,30761 | 0,804966138 | 0,0166  | DR1         | down-regulator of transcription 1, TBP-binding (negative cofactor 2)    |
| 0,830470024 | 0,15967 | 0,789493887 | 0,0055  | DR1         | down-regulator of transcription 1, TBP-binding (negative cofactor 2)    |
| 0,727994774 | 0,21355 | 0,774319028 | 0,01579 | DRAP1       | DR1-associated protein 1 (negative cofactor 2 alpha)                    |
| 1,043911927 | 0,65544 | 1,142346247 | 0,02161 | DRD2        | dopamine receptor D2                                                    |
| 1,089752112 | 0,36866 | 1,144724161 | 0,02788 | DRD2        | dopamine receptor D2                                                    |
| 1,22603486  | 0,07186 | 1,232852325 | 0,00036 | DRD5        | dopamine receptor D5                                                    |
| 0,936921447 | 0,62681 | 1,125838586 | 0,01918 | DRG2        | developmentally regulated GTP binding protein 2                         |
| 0,723467443 | 0,06843 | 0,813943185 | 0,00351 | DROSHA      | drosha, ribonuclease type III                                           |
| 1,222640278 | 0,09977 | 1,204137381 | 0,02848 | DRP2        | dystrophin related protein 2                                            |
| 1,106497353 | 0,33188 | 1,252664439 | 0,01434 | DSCAM       | Down syndrome cell adhesion molecule                                    |
| 0,940826108 | 0,55363 | 1,119612889 | 0,02046 | DSCAM-AS1   | DSCAM antisense RNA 1 (non-protein coding)                              |
| 0,955945318 | 0,74105 | 0,817335328 | 0,00449 | DSCC1       | defective in sister chromatid cohesion 1 homolog (S. cerevisiae)        |
| 1,108800644 | 0,29491 | 1,139973273 | 0,02778 | DSRC10      | Down syndrome critical region gene 10 (non-protein coding)              |
| 1,163926534 | 0,1528  | 1,163926534 | 0,00512 | DSRC9       | Down syndrome critical region gene 9 (non-protein coding)               |
| 0,987600861 | 0,88768 | 0,917639882 | 0,03184 | DSE         | dermatan sulfate epimerase                                              |
| 0,823591017 | 0,07116 | 0,865736566 | 0,00738 | DSTNP2      | destrin (actin depolymerizing factor) pseudogene 2                      |
| 0,651573575 | 0,09439 | 0,820172911 | 0,00506 | DSTYK       | dual serine/threonine and tyrosine protein kinase                       |
| 0,849096246 | 0,42428 | 0,739693755 | 0,00133 | DTL         | denticleless homolog (Drosophila)                                       |
| 1,003471749 | 0,96887 | 1,186736798 | 0,01012 | DTNA        | dystrobrevin, alpha                                                     |
| 0,974679631 | 0,78174 | 1,209994089 | 0,00096 | DTNA        | dystrobrevin, alpha                                                     |
| 0,965936329 | 0,75688 | 1,135242102 | 0,03021 | DTNA        | dystrobrevin, alpha                                                     |
| 1,038859103 | 0,55986 | 1,092020546 | 0,03204 | DTNA        | dystrobrevin, alpha                                                     |
| 1,155085785 | 0,14704 | 1,17772279  | 0,02259 | DTX1        | deltex homolog 1 (Drosophila)                                           |
| 1,019597683 | 0,88606 | 1,214194884 | 0,00295 | DTX2P1-UPK3 | DTX2P1-UPK3BP1-PMS2P11 readthrough (non-protein coding)                 |
| 1,107264584 | 0,35485 | 1,311302014 | 0,00065 | DTX3        | deltex homolog 3 (Drosophila)                                           |
| 1,22010051  | 0,20974 | 1,437936533 | 0,00003 | DTX4        | deltex homolog 4 (Drosophila)                                           |
| 0,986232704 | 0,8841  | 0,87417862  | 0,02249 | DUS4L       | dihydrouridine synthase 4-like (S. cerevisiae)                          |
| 0,813943185 | 0,0614  | 0,811689581 | 0,00557 | DUSP11      | dual specificity phosphatase 11 (RNA/RNP complex 1-interacting)         |
| 1,094293701 | 0,25293 | 1,174461971 | 0,02018 | DUSP13      | dual specificity phosphatase 13                                         |
| 0,882702996 | 0,16286 | 0,879039561 | 0,04594 | DUSP22      | dual specificity phosphatase 22                                         |
| 0,85027416  | 0,05023 | 0,811689581 | 0,00406 | DUSP23      | dual specificity phosphatase 23                                         |
| 0,821310701 | 0,05558 | 0,723969086 | 0,00225 | DUSP7       | dual specificity phosphatase 7                                          |
| 1,151089491 | 0,21158 | 1,167158102 | 0,00071 | DUSP8       | dual specificity phosphatase 8                                          |
| 0,851453708 | 0,39059 | 0,780786493 | 0,00529 | DUT         | deoxyuridine triphosphatase                                             |
| 0,837987135 | 0,20826 | 0,847919965 | 0,02532 | DUT         | deoxyuridine triphosphatase                                             |
| 1,130530567 | 0,29192 | 1,189207115 | 0,00432 | DUX1        | double homeobox 1                                                       |
| 1,234562607 | 0,06166 | 1,197478705 | 0,0176  | DUXAP10     | double homeobox A pseudogene 10                                         |
| 0,765248385 | 0,11132 | 0,831622098 | 0,0383  | DVL1        | dishevelled, dsh homolog 1 (Drosophila)                                 |
| 1,184271612 | 0,11827 | 1,147902414 | 0,01679 | DVL2        | dishevelled, dsh homolog 2 (Drosophila)                                 |
| 1,105730653 | 0,20346 | 1,155886707 | 0,01371 | DVL2        | dishevelled, dsh homolog 2 (Drosophila)                                 |
| 0,829894586 | 0,15654 | 0,89564567  | 0,03974 | DYM         | dymeclin                                                                |
| 0,86934456  | 0,06792 | 0,880869374 | 0,04287 | DYNC1H1     | dynein, cytoplasmic 1, heavy chain 1                                    |
| 0,593368399 | 0,07519 | 0,548285794 | 0,00002 | DYNC1H1     | dynein, cytoplasmic 1, heavy chain 1                                    |
| 0,894404902 | 0,24324 | 0,86934456  | 0,01412 | DYNC1H1     | dynein, cytoplasmic 1, heavy chain 1                                    |
| 1,207480591 | 0,0735  | 1,21167266  | 0,01584 | DYNC1I1     | dynein, cytoplasmic 1, intermediate chain 1                             |
| 0,773782497 | 0,44387 | 0,842062954 | 0,00547 | DYNC1L2     | dynein, cytoplasmic 1, light intermediate chain 2                       |
| 1,065846736 | 0,65589 | 0,873572896 | 0,01755 | DYNC2L1     | dynein, cytoplasmic 2, light intermediate chain 1                       |
| 0,786217292 | 0,11889 | 0,800514811 | 0,00622 | DYNC2L1     | dynein, cytoplasmic 2, light intermediate chain 1                       |
| 0,7944344   | 0,39321 | 0,757858283 | 0,00362 | DYNC2L1     | dynein, cytoplasmic 2, light intermediate chain 1                       |



|             |         |             |         |         |                                                                       |
|-------------|---------|-------------|---------|---------|-----------------------------------------------------------------------|
| 0,887611337 | 0,37925 | 0,872362706 | 0,03913 | DYNC2L1 | dynein, cytoplasmic 2, light intermediate chain 1                     |
| 0,993092495 | 0,93726 | 1,112650121 | 0,01372 | DYNLRB1 | dynein, light chain, roadblock-type 1                                 |
| 0,86934456  | 0,47255 | 0,847919965 | 0,0143  | DYRK1A  | dual-specificity tyrosine-(Y)-phosphorylation regulated kinase 1A     |
| 0,70759708  | 0,10061 | 0,683020128 | 0,00006 | DYRK2   | dual-specificity tyrosine-(Y)-phosphorylation regulated kinase 2      |
| 0,70759708  | 0,22148 | 0,578745108 | 0,00095 | DYRK2   | dual-specificity tyrosine-(Y)-phosphorylation regulated kinase 2      |
| 1,118837101 | 0,23492 | 1,184271612 | 0,01113 | DYSFIP1 | dysferlin interacting protein 1                                       |
| 1,126619228 | 0,27364 | 0,901875378 | 0,04134 | DZIP3   | DAZ interacting protein 3, zinc finger                                |
| 1,157490217 | 0,25967 | 1,273677475 | 0,0007  | E2F4    | E2F transcription factor 4, p107/p130-binding                         |
| 1,054091423 | 0,67314 | 1,169587664 | 0,01109 | E2F5    | E2F transcription factor 5, p130-binding                              |
| 0,862143545 | 0,1606  | 0,834509281 | 0,01299 | E2F6    | E2F transcription factor 6                                            |
| 1,193335743 | 0,51492 | 0,701249625 | 0       | E2F7    | E2F transcription factor 7                                            |
| 0,832775771 | 0,38304 | 0,610896551 | 0,00003 | E2F8    | E2F transcription factor 8                                            |
| 0,986232704 | 0,84975 | 0,823591017 | 0,00061 | EARS2   | glutamyl-tRNA synthetase 2, mitochondrial (putative)                  |
| 0,928516852 | 0,69141 | 0,901250463 | 0,04518 | EBAG9   | estrogen receptor binding site associated, antigen, 9                 |
| 1,938579634 | 0,05013 | 1,565908593 | 0,0024  | EBF1    | early B-cell factor 1                                                 |
| 1,364147835 | 0,09588 | 1,45296505  | 0,00382 | EBF1    | early B-cell factor 1                                                 |
| 1,286097483 | 0,08002 | 1,179356592 | 0,0152  | EBF3    | early B-cell factor 3                                                 |
| 1,025267238 | 0,7422  | 1,198309021 | 0,01069 | EBF3    | early B-cell factor 3                                                 |
| 0,753145233 | 0,07955 | 0,815637493 | 0,01098 | EBP     | emopamil binding protein (sterol isomerase)                           |
| 1,25353302  | 0,12784 | 1,237132479 | 0,00825 | ECE1    | endothelin converting enzyme 1                                        |
| 0,960594864 | 0,63801 | 1,164733586 | 0,01274 | ECE2    | endothelin converting enzyme 2                                        |
| 0,662503509 | 0,06727 | 0,750539549 | 0,03688 | ECHDC1  | enoyl CoA hydratase domain containing 1                               |
| 0,787853886 | 0,25767 | 0,845572287 | 0,00295 | ECHDC1  | enoyl CoA hydratase domain containing 1                               |
| 1,511519928 | 0,21144 | 1,604362333 | 0,00055 | ECM1    | extracellular matrix protein 1                                        |
| 1,086734863 | 0,30612 | 1,149494848 | 0,01828 | ECM2    | extracellular matrix protein 2, female organ and adipocyte specific   |
| 1,070288698 | 0,68269 | 1,511519928 | 0,00001 | ECSCR   | endothelial cell-specific chemotaxis regulator                        |
| 0,789493887 | 0,46222 | 0,764718139 | 0,00733 | ECT2    | epithelial cell transforming sequence 2 oncogene                      |
| 1,110338834 | 0,27251 | 1,128182137 | 0,01814 | EDA     | ectodysplasin A                                                       |
| 0,935623498 | 0,35576 | 1,125838586 | 0,00312 | EDA     | ectodysplasin A                                                       |
| 1,02313747  | 0,7574  | 1,120389214 | 0,04514 | EDA     | ectodysplasin A                                                       |
| 1,556170353 | 0,08803 | 1,439931319 | 0,00008 | EDEM2   | ER degradation enhancer, mannosidase alpha-like 2                     |
| 0,97063447  | 0,82867 | 1,411275843 | 0,01    | EDIL3   | EGF-like repeats and discoidin I-like domains 3                       |
| 1,135242102 | 0,52099 | 1,266634254 | 0,02296 | EDIL3   | EGF-like repeats and discoidin I-like domains 3                       |
| 0,637280314 | 0,06803 | 0,660211421 | 0,00286 | EEA1    | early endosome antigen 1                                              |
| 1,054091423 | 0,78932 | 0,806641759 | 0,00697 | EED     | embryonic ectoderm development                                        |
| 0,801069878 | 0,17033 | 0,768970416 | 0,00283 | EEF1A1  | eukaryotic translation elongation factor 1 alpha 1                    |
| 0,862143545 | 0,27102 | 0,79940583  | 0,00949 | EEF1E1  | eukaryotic translation elongation factor 1 epsilon 1                  |
| 0,998614666 | 0,98569 | 1,192508872 | 0,00089 | EEPDP1  | endonuclease/exonuclease/phosphatase family domain containing 1       |
| 0,940174203 | 0,53258 | 0,877213549 | 0,01953 | EFCAB1  | EF-hand calcium binding domain 1                                      |
| 0,903752727 | 0,39558 | 0,859160755 | 0,01441 | EFCAB11 | EF-hand calcium binding domain 11                                     |
| 1,132098902 | 0,5053  | 0,832198735 | 0,01987 | EFCAB2  | EF-hand calcium binding domain 2                                      |
| 1,354724977 | 0,06981 | 1,352848231 | 0,00238 | EFCAB4A | EF-hand calcium binding domain 4A                                     |
| 1,148698355 | 0,16293 | 1,128182137 | 0,01384 | EFCAB5  | EF-hand calcium binding domain 5                                      |
| 1,127400412 | 0,55744 | 0,899378312 | 0,02638 | EFCAB6  | EF-hand calcium binding domain 6                                      |
| 1,051901779 | 0,67113 | 1,204137381 | 0,02341 | EFCAB6  | EF-hand calcium binding domain 6                                      |
| 0,928516852 | 0,71113 | 0,790589117 | 0,01985 | EFCAB7  | EF-hand calcium binding domain 7                                      |
| 0,944092419 | 0,79894 | 0,803293997 | 0,02612 | EFEMP1  | EGF containing fibulin-like extracellular matrix protein 1            |
| 1,198309021 | 0,42691 | 1,503161477 | 0,00079 | EFEMP2  | EGF containing fibulin-like extracellular matrix protein 2            |
| 0,835087919 | 0,42498 | 0,76684133  | 0,00055 | EFHA1   | EF-hand domain family, member A1                                      |
| 0,756283999 | 0,1244  | 0,865136691 | 0,02553 | EFHC1   | EF-hand domain (C-terminal) containing 1                              |
| 1,003471749 | 0,97976 | 0,797192477 | 0,00324 | EFHC2   | EF-hand domain (C-terminal) containing 2                              |
| 0,507331273 | 0,12028 | 0,617709319 | 0,01125 | EFNA5   | ephrin-A5                                                             |
| 0,713012859 | 0,36219 | 0,711531731 | 0,00323 | EFNB2   | ephrin-B2                                                             |
| 0,815072332 | 0,28925 | 0,827023368 | 0,0023  | EFR3A   | EFR3 homolog A (S. cerevisiae)                                        |
| 1,297738767 | 0,05576 | 1,261377409 | 0,00021 | EFR3B   | EFR3 homolog B (S. cerevisiae)                                        |
| 1,322254605 | 0,10699 | 1,464085696 | 0,00473 | EGFL7   | EGF-like-domain, multiple 7                                           |
| 1,426025717 | 0,0817  | 1,335148303 | 0,03589 | EGFR    | epidermal growth factor receptor                                      |
| 0,597081594 | 0,30816 | 0,622868708 | 0,00007 | EGFR    | epidermal growth factor receptor                                      |
| 1,038139271 | 0,59458 | 1,125838586 | 0,02489 | EGFR    | epidermal growth factor receptor                                      |
| 1,025978145 | 0,7821  | 1,17772279  | 0,00909 | EGFR    | epidermal growth factor receptor                                      |
| 0,867538687 | 0,21951 | 0,791685866 | 0,01357 | EGLN1   | egl nine homolog 1 (C. elegans)                                       |
| 1,16877249  | 0,19071 | 1,208317843 | 0,00223 | EGLN2   | egl nine homolog 2 (C. elegans)                                       |
| 0,698823486 | 0,21803 | 0,671286251 | 0,00224 | EGLN3   | egl nine homolog 3 (C. elegans)                                       |
| 1,121166078 | 0,13638 | 1,184271612 | 0,02022 | EGOT    | eosinophil granule ontogeny transcript (non-protein coding)           |
| 0,99519722  | 0,96843 | 0,888226796 | 0,03144 | EGR4    | early growth response 4                                               |
| 0,71449707  | 0,1371  | 0,752623374 | 0,00119 | EHBP1   | EH domain binding protein 1                                           |
| 0,651120295 | 0,0871  | 0,873572896 | 0,04593 | EHF     | ets homologous factor                                                 |
| 0,823020345 | 0,20841 | 0,831045862 | 0,00072 | EHMT1   | euchromatic histone-lysine N-methyltransferase 1                      |
| 0,984866443 | 0,87354 | 1,236275261 | 0,00021 | EHMT2   | euchromatic histone-lysine N-methyltransferase 2                      |
| 0,831622098 | 0,1093  | 0,815072332 | 0,04014 | EID2    | EP300 interacting inhibitor of differentiation 2                      |
| 0,959929261 | 0,58454 | 0,924022572 | 0,03168 | EIF1    | eukaryotic translation initiation factor 1                            |
| 1,098092814 | 0,56057 | 0,868742185 | 0,01202 | EIF1    | eukaryotic translation initiation factor 1                            |
| 0,952637998 | 0,62871 | 0,909408252 | 0,0413  | EIF1AD  | eukaryotic translation initiation factor 1A domain containing         |
| 0,887611337 | 0,38728 | 0,813379198 | 0,0006  | EIF1AD  | eukaryotic translation initiation factor 1A domain containing         |
| 0,666187413 | 0,08088 | 0,653835674 | 0,00064 | EIF1AX  | eukaryotic translation initiation factor 1A, X-linked                 |
| 0,732550437 | 0,12021 | 0,689680461 | 0,00077 | EIF1AX  | eukaryotic translation initiation factor 1A, X-linked                 |
| 0,865136691 | 0,55209 | 0,768970416 | 0,00014 | EIF1AX  | eukaryotic translation initiation factor 1A, X-linked                 |
| 1,130530567 | 0,23437 | 0,878430468 | 0,03318 | EIF1AY  | eukaryotic translation initiation factor 1A, Y-linked                 |
| 0,980779004 | 0,83774 | 0,867538687 | 0,04519 | EIF1AY  | eukaryotic translation initiation factor 1A, Y-linked                 |
| 0,925946023 | 0,4806  | 0,750539549 | 0,00096 | EIF1B   | eukaryotic translation initiation factor 1B                           |
| 0,857376037 | 0,29711 | 0,87417862  | 0,01464 | EIF2A   | eukaryotic translation initiation factor 2A, 65kDa                    |
| 0,749499801 | 0,05552 | 0,847919965 | 0,00168 | EIF2B1  | eukaryotic translation initiation factor 2B, subunit 1 alpha, 26kDa   |
| 0,820741609 | 0,05054 | 0,822450069 | 0,00229 | EIF2B2  | eukaryotic translation initiation factor 2B, subunit 2 beta, 39kDa    |
| 0,895025071 | 0,34492 | 0,854409741 | 0,00121 | EIF2B5  | eukaryotic translation initiation factor 2B, subunit 5 epsilon, 82kDa |
| 0,945402117 | 0,62588 | 0,857376037 | 0,02907 | EIF2C1  | eukaryotic translation initiation factor 2C, 1                        |
| 0,70027816  | 0,13713 | 0,726482525 | 0,00023 | EIF2C2  | eukaryotic translation initiation factor 2C, 2                        |
| 0,714992493 | 0,06784 | 0,799960128 | 0,00403 | EIF2C2  | eukaryotic translation initiation factor 2C, 2                        |
| 0,658383461 | 0,2227  | 0,602903914 | 0,00013 | EIF2C2  | eukaryotic translation initiation factor 2C, 2                        |
| 0,792234811 | 0,35388 | 0,595428425 | 0,00013 | EIF2C2  | eukaryotic translation initiation factor 2C, 2                        |
| 0,872967591 | 0,48611 | 0,780786493 | 0,00187 | EIF2C3  | eukaryotic translation initiation factor 2C, 3                        |
| 0,808320869 | 0,06721 | 0,828170661 | 0,02038 | EIF2C4  | eukaryotic translation initiation factor 2C, 4                        |
| 0,951318276 | 0,5403  | 0,862741345 | 0,02514 | EIF2C4  | eukaryotic translation initiation factor 2C, 4                        |
| 0,638164384 | 0,06593 | 0,711038705 | 0,0024  | EIF2C4  | eukaryotic translation initiation factor 2C, 4                        |
| 0,920825697 | 0,42813 | 0,858565436 | 0,01594 | EIF2D   | eukaryotic translation initiation factor 2D                           |
| 0,779704843 | 0,07755 | 0,752623374 | 0,00001 | EIF2S1  | eukaryotic translation initiation factor 2, subunit 1 alpha, 35kDa    |
| 0,577943353 | 0,05935 | 0,720464874 | 0,00023 | EIF2S1  | eukaryotic translation initiation factor 2, subunit 1 alpha, 35kDa    |
| 0,816203046 | 0,05494 | 0,855595026 | 0,01511 | EIF2S1  | eukaryotic translation initiation factor 2, subunit 1 alpha, 35kDa    |
| 0,612592666 | 0,08411 | 0,879039561 | 0,04938 | EIF2S2  | eukaryotic translation initiation factor 2, subunit 2 beta, 38kDa     |
| 0,887611337 | 0,34023 | 0,859756486 | 0,00383 | EIF2S3  | eukaryotic translation initiation factor 2, subunit 3 gamma, 52kDa    |
| 0,922742493 | 0,63346 | 0,893785162 | 0,04267 | EIF3A   | eukaryotic translation initiation factor 3, subunit A                 |
| 0,598324482 | 0,07636 | 0,77271055  | 0,00053 | EIF3A   | eukaryotic translation initiation factor 3, subunit A                 |
| 0,749499801 | 0,23649 | 0,77916458  | 0,01283 | EIF3B   | eukaryotic translation initiation factor 3, subunit B                 |
| 0,908778116 | 0,38945 | 0,797192477 | 0,01902 | EIF3B   | eukaryotic translation initiation factor 3, subunit B                 |
| 0,650220073 | 0,08237 | 0,782411782 | 0,00019 | EIF3B   | eukaryotic translation initiation factor 3, subunit B                 |

|             |         |             |         |           |                                                                                |
|-------------|---------|-------------|---------|-----------|--------------------------------------------------------------------------------|
| 0,87539133  | 0,65568 | 0,588861395 | 0,00085 | EIF3C     | eukaryotic translation initiation factor 3, subunit C                          |
| 0,639492791 | 0,05993 | 0,859160755 | 0,00484 | EIF3E     | eukaryotic translation initiation factor 3, subunit E                          |
| 0,77271055  | 0,05247 | 0,807201075 | 0,00005 | EIF3M     | eukaryotic translation initiation factor 3, subunit M                          |
| 1,292352831 | 0,25096 | 0,842062954 | 0,04258 | EIF3M     | eukaryotic translation initiation factor 3, subunit M                          |
| 0,638164384 | 0,06528 | 0,653382627 | 0,00041 | EIF4E     | eukaryotic translation initiation factor 4E                                    |
| 0,77271055  | 0,29644 | 0,804408371 | 0,00805 | EIF4E     | eukaryotic translation initiation factor 4E                                    |
| 0,733566672 | 0,09216 | 0,86154616  | 0,01237 | EIF4E2    | eukaryotic translation initiation factor 4E family member 2                    |
| 0,831622098 | 0,10709 | 0,788946841 | 0,00018 | EIF4E2    | eukaryotic translation initiation factor 4E family member 2                    |
| 1,025978145 | 0,91634 | 0,846158597 | 0,03267 | EIF4E3    | eukaryotic translation initiation factor 4E family member 3                    |
| 0,839731493 | 0,10333 | 0,788946841 | 0,02085 | EIF4E3    | eukaryotic translation initiation factor 4E family member 3                    |
| 0,830470024 | 0,32921 | 0,77916458  | 0,00379 | EIF4E3    | eukaryotic translation initiation factor 4E family member 3                    |
| 0,791685866 | 0,19408 | 0,62676651  | 0,01206 | EIF4E3    | eukaryotic translation initiation factor 4E family member 3                    |
| 0,84264683  | 0,07939 | 0,871154192 | 0,01431 | EIF4ENIF1 | eukaryotic translation initiation factor 4E nuclear import factor 1            |
| 0,662044455 | 0,26924 | 0,797192477 | 0,02047 | EIF4G1    | eukaryotic translation initiation factor 4 gamma, 1                            |
| 0,69495911  | 0,09235 | 0,810003474 | 0,00243 | EIF4G3    | eukaryotic translation initiation factor 4 gamma, 3                            |
| 0,575943821 | 0,08052 | 0,806641759 | 0,03575 | EIF5      | eukaryotic translation initiation factor 5                                     |
| 0,581560021 | 0,08424 | 0,857376037 | 0,0331  | EIF5      | eukaryotic translation initiation factor 5                                     |
| 0,70514898  | 0,11886 | 0,834509281 | 0,01272 | EIF5B     | eukaryotic translation initiation factor 5B                                    |
| 0,806641759 | 0,31532 | 0,842062954 | 0,02095 | EIF5B     | eukaryotic translation initiation factor 5B                                    |
| 0,756283999 | 0,17956 | 0,780786493 | 0,03639 | EIF5B     | eukaryotic translation initiation factor 5B                                    |
| 0,647072827 | 0,0735  | 0,71548826  | 0,00017 | EIF5B     | eukaryotic translation initiation factor 5B                                    |
| 1,062159186 | 0,56883 | 1,111108729 | 0,01139 | EIVLAV3   | EIVLAV (embryonic lethal, abnormal vision, Drosophila)-like 3 (Hu antigen C)   |
| 1,581178233 | 0,05929 | 1,275444392 | 0,03645 | ELF3      | E74-like factor 3 (ets domain transcription factor, epithelial-specific)       |
| 0,984866443 | 0,8754  | 0,898755127 | 0,03335 | ELF4      | E74-like factor 4 (ets domain transcription factor)                            |
| 1,248330549 | 0,09761 | 1,193335743 | 0,01714 | ELFN1     | extracellular leucine-rich repeat and fibronectin type III domain containing 1 |
| 0,999307093 | 0,99331 | 1,155085785 | 0,03973 | ELFN2     | extracellular leucine-rich repeat and fibronectin type III domain containing 2 |
| 1,068065408 | 0,66032 | 1,163926534 | 0,01574 | ELK1      | ELK1, member of ETS oncogene family                                            |
| 0,957271458 | 0,90157 | 0,788946841 | 0,03211 | ELK4      | ELK4, ETS-domain protein (SRF accessory protein 1)                             |
| 1,009051634 | 0,9415  | 0,8962667   | 0,0496  | ELL2      | elongation factor, RNA polymerase II, 2                                        |
| 0,743806881 | 0,05749 | 0,71449707  | 0,00043 | ELL2      | elongation factor, RNA polymerase II, 2                                        |
| 0,878430468 | 0,41275 | 1,25092908  | 0,04658 | ELN       | elastin                                                                        |
| 0,51015233  | 0,05658 | 0,817335328 | 0,03047 | ELOVL1    | ELOVL fatty acid elongase 1                                                    |
| 0,698823486 | 0,18246 | 0,675955417 | 0,00012 | ELOVL6    | ELOVL fatty acid elongase 6                                                    |
| 0,774855931 | 0,07393 | 0,687770909 | 0       | ELOVL6    | ELOVL fatty acid elongase 6                                                    |
| 1,229438867 | 0,18434 | 1,460032011 | 0,00158 | EMCN      | endomucin                                                                      |
| 1,601029621 | 0,05977 | 1,308578071 | 0,00792 | EMCN      | endomucin                                                                      |
| 1,050444544 | 0,59678 | 1,138394029 | 0,01446 | EMD       | emerin                                                                         |
| 1,024556823 | 0,84468 | 1,204137381 | 0,0031  | EME1      | essential meiotic endonuclease 1 homolog 1 (S. pombe)                          |
| 1,209155676 | 0,07717 | 1,145517898 | 0,0133  | EME2      | essential meiotic endonuclease 1 homolog 2 (S. pombe)                          |
| 1,159899655 | 0,23193 | 1,244874235 | 0,00199 | EMID1     | EMI domain containing 1                                                        |
| 1,215036792 | 0,40896 | 1,440292749 | 0,00891 | EMILIN1   | elastin microfibril interfacier 1                                              |
| 1,165541198 | 0,07089 | 1,125058485 | 0,00082 | EMILIN2   | elastin microfibril interfacier 2                                              |
| 0,731028724 | 0,25684 | 0,642603169 | 0,00052 | EML1      | echinoderm microtubule associated protein like 1                               |
| 1,014662547 | 0,88448 | 1,173648178 | 0,0013  | EML2      | echinoderm microtubule associated protein like 2                               |
| 1,136029265 | 0,3994  | 1,295940965 | 0,00123 | EML2      | echinoderm microtubule associated protein like 2                               |
| 0,687294348 | 0,18457 | 0,711531731 | 0,00161 | EML4      | echinoderm microtubule associated protein like 4                               |
| 1,003471749 | 0,98568 | 0,664342907 | 0,00001 | EML5      | echinoderm microtubule associated protein like 5                               |
| 0,777546036 | 0,18912 | 0,889458994 | 0,02116 | EMP2      | epithelial membrane protein 2                                                  |
| 1,114193651 | 0,7171  | 1,522033381 | 0,00077 | EMP3      | epithelial membrane protein 3                                                  |
| 1,231144413 | 0,0656  | 1,229438867 | 0,00461 | EMR1      | egf-like module containing, mucin-like, hormone receptor-like 1                |
| 1,064370182 | 0,4584  | 1,167967395 | 0,00215 | EMX1      | empty spiracles homeobox 1                                                     |
| 0,989656656 | 0,90537 | 1,131314463 | 0,02466 | EMX2OS    | EMX2 opposite strand/antisense RNA (non-protein coding)                        |
| 0,842062954 | 0,31328 | 0,737134609 | 0,00001 | ENAH      | enabled homolog (Drosophila)                                                   |
| 0,701735863 | 0,14723 | 0,767905135 | 0,00615 | ENAH      | enabled homolog (Drosophila)                                                   |
| 0,875998315 | 0,40226 | 0,62981499  | 0,00005 | ENCL1     | ectodermal-neural cortex 1 (with BTB-like domain)                              |
| 0,868742185 | 0,26363 | 0,843815796 | 0,01558 | ENDOG     | endonuclease G                                                                 |
| 1,333298677 | 0,20539 | 1,31494276  | 0,01064 | ENG       | endoglin                                                                       |
| 0,995849753 | 0,97679 | 1,173648178 | 0,0444  | ENGASE    | endo-beta-N-acetylglucosaminidase                                              |
| 0,969289817 | 0,81488 | 1,165541198 | 0,01752 | ENGASE    | endo-beta-N-acetylglucosaminidase                                              |
| 1,081474763 | 0,44593 | 1,163120042 | 0,01441 | ENHO      | energy homeostasis associated                                                  |
| 0,820741609 | 0,17131 | 0,669427628 | 0,00026 | ENOPH1    | enolase-phosphatase 1                                                          |
| 0,791137301 | 0,1386  | 0,784040454 | 0,00001 | ENOSF1    | enolase superfamily member 1                                                   |
| 0,777546036 | 0,12311 | 0,885767519 | 0,0282  | ENOX2     | ecto-NOX disulfide-thiol exchanger 2                                           |
| 1,144724161 | 0,19687 | 1,141554707 | 0,03588 | ENOX2     | ecto-NOX disulfide-thiol exchanger 2                                           |
| 0,819036698 | 0,10345 | 0,797192477 | 0,00031 | ENOX2     | ecto-NOX disulfide-thiol exchanger 2                                           |
| 1,146312186 | 0,24011 | 1,232852325 | 0,00225 | ENPP3     | ectonucleotide pyrophosphatase/phosphodiesterase 3                             |
| 0,977385766 | 0,8389  | 0,835666959 | 0,00517 | ENTPD1    | ectonucleoside triphosphate diphosphohydrolase 1                               |
| 1,068805991 | 0,48307 | 1,221793102 | 0,00848 | ENTPD2    | ectonucleoside triphosphate diphosphohydrolase 2                               |
| 0,79940583  | 0,2501  | 0,806082831 | 0,0091  | ENTPD3    | ectonucleoside triphosphate diphosphohydrolase 3                               |
| 0,786762445 | 0,0548  | 0,832757751 | 0,01834 | ENTPD5    | ectonucleoside triphosphate diphosphohydrolase 5                               |
| 1,11108729  | 0,43587 | 1,185914499 | 0,01984 | ENTPD6    | ectonucleoside triphosphate diphosphohydrolase 6 (putative)                    |
| 0,782411782 | 0,1165  | 0,795536484 | 0,00653 | ENY2      | enhancer of yellow 2 homolog (Drosophila)                                      |
| 0,74277646  | 0,17984 | 0,741747467 | 0,00125 | EP300     | E1A binding protein p300                                                       |
| 0,862143545 | 0,20488 | 0,888226796 | 0,04145 | EP400     | E1A binding protein p400                                                       |
| 1,113421618 | 0,20753 | 1,180174343 | 0,03209 | EP400     | E1A binding protein p400                                                       |
| 1,084477409 | 0,40616 | 1,163926534 | 0,0143  | EP400NL   | EP400 N-terminal like                                                          |
| 0,783497187 | 0,08874 | 0,824733549 | 0,0044  | EPAG      | early lymphoid activation protein                                              |
| 1,012554807 | 0,92118 | 1,299539062 | 0,00065 | EPB41L2   | erythrocyte membrane protein band 4.1-like 2                                   |
| 0,791685866 | 0,17778 | 0,835087919 | 0,00343 | EPB41L4A  | erythrocyte membrane protein band 4.1 like 4A                                  |
| 0,693515485 | 0,18898 | 0,636838738 | 0,00017 | EPB41L5   | erythrocyte membrane protein band 4.1 like 5                                   |
| 0,87417862  | 0,65243 | 0,708578698 | 0,00609 | EPB41L5   | erythrocyte membrane protein band 4.1 like 5                                   |
| 1,272794935 | 0,06812 | 1,132883885 | 0,00738 | EPB42     | erythrocyte membrane protein band 4.2                                          |
| 1,041021598 | 0,65294 | 1,115739322 | 0,03213 | EPHA10    | EPH receptor A10                                                               |
| 1,098854218 | 0,31222 | 1,134455485 | 0,02183 | EPHA10    | EPH receptor A10                                                               |
| 0,689680461 | 0,09524 | 0,789493887 | 0,00497 | EPHA4     | EPH receptor A4                                                                |
| 0,70027816  | 0,18348 | 0,782954296 | 0,03701 | EPHA4     | EPH receptor A4                                                                |
| 1,088242442 | 0,43096 | 1,146312186 | 0,04278 | EPHA5     | EPH receptor A5                                                                |
| 1,065108203 | 0,47116 | 1,140763716 | 0,01631 | EPHA6     | EPH receptor A6                                                                |
| 0,893785162 | 0,35731 | 1,183451022 | 0,00413 | EPHA8     | EPH receptor A8                                                                |
| 1,193335743 | 0,08906 | 1,165541198 | 0,03935 | EPHB1     | EPH receptor B1                                                                |
| 1,123499903 | 0,37617 | 1,268391399 | 0,0014  | EPHB2     | EPH receptor B2                                                                |
| 1,101905116 | 0,41396 | 1,217566019 | 0,00564 | EPHB2     | EPH receptor B2                                                                |
| 0,828744904 | 0,05867 | 0,860352631 | 0,01601 | EPHB3     | EPH receptor B3                                                                |
| 0,971307496 | 0,81296 | 0,839149637 | 0,0036  | EPM2A     | epilepsy, progressive myoclonus type 2A, Lafora disease (laforin)              |
| 0,840896415 | 0,2321  | 0,868140228 | 0,02088 | EPM2AIP1  | EPM2A (laforin) interacting protein 1                                          |
| 1,030968319 | 0,82947 | 1,125058485 | 0,02643 | EPK1      | epiplakin 1                                                                    |
| 0,701249625 | 0,299   | 0,751580739 | 0,00018 | EPRS      | glutamyl-prolyl-tRNA synthetase                                                |
| 0,756283999 | 0,08251 | 0,883315051 | 0,00428 | EPRS      | glutamyl-prolyl-tRNA synthetase                                                |
| 0,911301281 | 0,32911 | 0,856781955 | 0,01339 | EPS15L1   | epidermal growth factor receptor pathway substrate 15-like 1                   |
| 0,811127156 | 0,12207 | 0,884540435 | 0,03481 | EPS15L1   | epidermal growth factor receptor pathway substrate 15-like 1                   |
| 0,90062598  | 0,62313 | 0,741747467 | 0,01032 | EPT1      | ethanolaminephosphotransferase 1 (CDP-ethanolamine-specific)                   |
| 0,910669834 | 0,42688 | 0,86154616  | 0,03226 | EPT1      | ethanolaminephosphotransferase 1 (CDP-ethanolamine-specific)                   |
| 1,048989328 | 0,74039 | 0,866336856 | 0,03707 | ERAP1     | endoplasmic reticulum aminopeptidase 1                                         |
| 0,904379378 | 0,63229 | 0,852634892 | 0,0256  | ERBB2IP   | erb2 interacting protein                                                       |

|             |         |             |         |           |                                                                                                                                 |
|-------------|---------|-------------|---------|-----------|---------------------------------------------------------------------------------------------------------------------------------|
| 0,76630998  | 0,34563 | 0,884540435 | 0,01616 | ERC1      | ELKS/RAB6-interacting/CAST family member 1                                                                                      |
| 0,765248385 | 0,24987 | 0,635075491 | 0,0347  | ERC2      | ELKS/RAB6-interacting/CAST family member 2                                                                                      |
| 0,906890329 | 0,65829 | 1,199139914 | 0,00244 | ERC1C     | excision repair cross-complementing rodent repair deficiency, complementation group 1 (includes overlapping antisense sequence) |
| 1,077733145 | 0,3305  | 1,199971382 | 0,00625 | ERC4      | excision repair cross-complementing rodent repair deficiency, complementation group 4                                           |
| 1,085229372 | 0,37036 | 0,933032992 | 0,04078 | ERC8      | excision repair cross-complementing rodent repair deficiency, complementation group 8                                           |
| 1,156688184 | 0,27128 | 1,278985581 | 0,00012 | ERF       | Ets2 repressor factor                                                                                                           |
| 1,341642225 | 0,08917 | 1,280759861 | 0,03672 | ERG       | v-ets erythroblastosis virus E26 oncogene homolog (avian)                                                                       |
| 1,240567298 | 0,14267 | 1,286989247 | 0,0026  | ERGIC1    | endoplasmic reticulum-golgi intermediate compartment (ERGIC) 1                                                                  |
| 0,883315051 | 0,48966 | 0,827596816 | 0,0461  | ERGIC2    | ERGIC and golgi 2                                                                                                               |
| 1,00486382  | 0,95807 | 0,883927531 | 0,01379 | ERGIC3    | ERGIC and golgi 3                                                                                                               |
| 0,943438251 | 0,88225 | 1,267512522 | 0,00099 | ERGIC3    | ERGIC and golgi 3                                                                                                               |
| 0,72597914  | 0,08842 | 0,823591017 | 0,02789 | ERL1      | exoribonuclease 1                                                                                                               |
| 1,068065408 | 0,55206 | 0,831045862 | 0,00861 | ERL1      | exoribonuclease 1                                                                                                               |
| 0,657927263 | 0,10355 | 0,690637224 | 0,00016 | ERL2      | ERI1 exoribonuclease family member 2                                                                                            |
| 0,866937564 | 0,2217  | 0,823020345 | 0,03337 | ERL1C     | glutamate-rich 1                                                                                                                |
| 0,79774524  | 0,14152 | 0,829319546 | 0,00033 | ERL1N1    | ER lipid raft associated 1                                                                                                      |
| 0,69399636  | 0,09343 | 0,812252396 | 0,0331  | ERMP1     | endoplasmic reticulum metalloproteinase 1                                                                                       |
| 1,121943481 | 0,29621 | 1,172834949 | 0,00654 | ERN1      | endoplasmic reticulum to nucleus signaling 1                                                                                    |
| 1,033114388 | 0,89279 | 1,235418637 | 0,00069 | ERP29     | endoplasmic reticulum protein 29                                                                                                |
| 0,953298545 | 0,64732 | 0,824733549 | 0,00935 | ERP44     | endoplasmic reticulum protein 44                                                                                                |
| 0,91319825  | 0,52072 | 0,687770909 | 0,00001 | ERP44     | endoplasmic reticulum protein 44                                                                                                |
| 1,168777249 | 0,31864 | 1,295042999 | 0,00277 | ERVH-1    | endogenous retrovirus group H, member 1                                                                                         |
| 1,087488391 | 0,34253 | 1,174461971 | 0,00246 | ERVV-1    | endogenous retrovirus group V, member 1                                                                                         |
| 1,069547088 | 0,52938 | 1,146312186 | 0,02757 | ERVW-1    | endogenous retrovirus group W, member 1                                                                                         |
| 0,832198735 | 0,37415 | 0,802737389 | 0,00787 | ESCO1     | establishment of cohesion 1 homolog 1 (S. cerevisiae)                                                                           |
| 0,751580739 | 0,10295 | 0,628942486 | 0,00012 | ESCO1     | establishment of cohesion 1 homolog 1 (S. cerevisiae)                                                                           |
| 0,965267025 | 0,8803  | 0,826450318 | 0,0245  | ESD       | esterase D                                                                                                                      |
| 0,827596816 | 0,18005 | 0,821880187 | 0,00211 | ESD       | esterase D                                                                                                                      |
| 0,967947027 | 0,83949 | 0,700763725 | 0,00328 | ESF1      | ESF1, nucleolar pre-rRNA processing protein, homolog (S. cerevisiae)                                                            |
| 1,088242442 | 0,46717 | 1,29145735  | 0,00119 | ESPNL     | espin-like                                                                                                                      |
| 0,961260928 | 0,68221 | 1,177722729 | 0,00636 | ESPNL     | espin-like                                                                                                                      |
| 0,994470169 | 0,94747 | 1,120389214 | 0,04899 | ESR1      | estrogen receptor 1                                                                                                             |
| 1,085981856 | 0,47688 | 1,188383105 | 0,03503 | ESR1      | estrogen receptor 1                                                                                                             |
| 1,092020546 | 0,23981 | 1,133669413 | 0,01506 | ESR1      | estrogen receptor 1                                                                                                             |
| 1,234562607 | 0,0569  | 1,276328769 | 0,00381 | ESR2      | estrogen receptor 2 (ER beta)                                                                                                   |
| 0,936272247 | 0,6713  | 1,145517898 | 0,03118 | ESRRA     | estrogen-related receptor alpha                                                                                                 |
| 1,126619228 | 0,31482 | 1,270150983 | 0,00134 | ESYT1     | extended synaptotagmin-like protein 1                                                                                           |
| 0,816768991 | 0,2852  | 0,786762445 | 0,00619 | ESYT2     | extended synaptotagmin-like protein 2                                                                                           |
| 0,991716731 | 0,95216 | 0,846745312 | 0,02256 | ESYT2     | extended synaptotagmin-like protein 2                                                                                           |
| 0,939522749 | 0,70843 | 0,807760778 | 0,00721 | ETAA1     | Ewing tumor-associated antigen 1                                                                                                |
| 0,773246337 | 0,0526  | 0,745872013 | 0,00064 | ETFA      | electron-transfer-flavoprotein, alpha polypeptide                                                                               |
| 1,213353556 | 0,06083 | 1,306765254 | 0,00036 | ET51      | v-ets erythroblastosis virus E26 oncogene homolog 1 (avian)                                                                     |
| 1,463071221 | 0,05126 | 1,338855257 | 0,00209 | ETS1      | v-ets erythroblastosis virus E26 oncogene homolog 1 (avian)                                                                     |
| 0,882702996 | 0,2721  | 1,113421618 | 0,03987 | ETV4      | ets variant 4                                                                                                                   |
| 0,940174203 | 0,60677 | 0,90000193  | 0,04238 | ETV6      | ets variant 6                                                                                                                   |
| 1,091263877 | 0,26656 | 1,327765158 | 0,00116 | ETV6      | ets variant 6                                                                                                                   |
| 1,102669163 | 0,3632  | 1,199971382 | 0,02275 | ETV6      | ets variant 6                                                                                                                   |
| 1,22010051  | 0,10989 | 1,214194884 | 0,00926 | ETV7      | ets variant 7                                                                                                                   |
| 0,951977908 | 0,60067 | 0,871154192 | 0,02073 | EVIS      | ecotropic viral integration site 5                                                                                              |
| 1,285206337 | 0,21527 | 1,365093718 | 0,00583 | EVL       | Enah/Vasp-like                                                                                                                  |
| 1,244011653 | 0,19841 | 1,204137381 | 0,03387 | EVL       | Enah/Vasp-like                                                                                                                  |
| 0,74277646  | 0,1127  | 0,823591017 | 0,00221 | EXOC1     | exocyst complex component 1                                                                                                     |
| 0,785128119 | 0,13059 | 0,821310701 | 0,00213 | EXOC2     | exocyst complex component 2                                                                                                     |
| 0,648869383 | 0,0694  | 0,863938187 | 0,01455 | EXOC3     | exocyst complex component 3                                                                                                     |
| 1,066585781 | 0,42074 | 1,220946513 | 0,00091 | EXOC3L1   | exocyst complex component 3-like 1                                                                                              |
| 1,155085785 | 0,1293  | 1,313121125 | 0,00018 | EXOC3L2   | exocyst complex component 3-like 2                                                                                              |
| 0,846745312 | 0,58563 | 0,753667455 | 0,02481 | EXOC5     | exocyst complex component 5                                                                                                     |
| 0,868140228 | 0,4975  | 0,783497187 | 0,00021 | EXOC5     | exocyst complex component 5                                                                                                     |
| 0,922742493 | 0,74377 | 0,736623843 | 0,02258 | EXOC5     | exocyst complex component 5                                                                                                     |
| 1,209155676 | 0,07443 | 1,184271612 | 0,00132 | EXOC6     | exocyst complex component 6                                                                                                     |
| 0,976708529 | 0,87754 | 1,112650121 | 0,02956 | EXOC7     | exocyst complex component 7                                                                                                     |
| 0,758909626 | 0,17762 | 0,681129017 | 0,00003 | EXOC8     | exocyst complex component 8                                                                                                     |
| 0,931740429 | 0,27352 | 0,910038824 | 0,04203 | EXOG      | endo/exonuclease (5'-3'), endonuclease G-like                                                                                   |
| 1,022428531 | 0,84415 | 1,161508732 | 0,03083 | EXOSC10   | exosome component 10                                                                                                            |
| 0,925304428 | 0,43032 | 0,817902059 | 0,00245 | EXOSC2    | exosome component 2                                                                                                             |
| 0,883315051 | 0,13697 | 0,803293997 | 0,0016  | EXOSC3    | exosome component 3                                                                                                             |
| 0,776468875 | 0,1147  | 0,857376037 | 0,00967 | EXOSC6    | exosome component 6                                                                                                             |
| 0,855595026 | 0,46378 | 0,835087919 | 0,00043 | EXT1      | exostosin 1                                                                                                                     |
| 0,832775771 | 0,50216 | 0,729004689 | 0,00064 | EXT1      | exostosin 1                                                                                                                     |
| 0,97063447  | 0,80367 | 1,224336392 | 0,00008 | EZH1      | enhancer of zeste homolog 1 (Drosophila)                                                                                        |
| 0,855595026 | 0,0887  | 0,882091365 | 0,04925 | EZH1      | enhancer of zeste homolog 1 (Drosophila)                                                                                        |
| 0,645281245 | 0,11963 | 0,768437591 | 0,00246 | EZH2      | enhancer of zeste homolog 2 (Drosophila)                                                                                        |
| 0,47204621  | 0,12318 | 0,654742712 | 0,04022 | EZR       | eZRin                                                                                                                           |
| 0,891310496 | 0,33962 | 0,886996305 | 0,01963 | F11R      | F11 receptor                                                                                                                    |
| 1,151887642 | 0,13719 | 1,102669163 | 0,01846 | F2R       | coagulation factor II (thrombin) receptor                                                                                       |
| 1,188383105 | 0,07433 | 1,160703914 | 0,01281 | F5        | coagulation factor V (proaccelerin, labile factor)                                                                              |
| 1,208317843 | 0,06574 | 1,147107024 | 0,03325 | F7        | coagulation factor VII (serum prothrombin conversion accelerator)                                                               |
| 0,868742185 | 0,11043 | 0,811127156 | 0,00302 | FAAH2     | fatty acid amide hydrolase 2                                                                                                    |
| 1,077733145 | 0,43007 | 1,123499903 | 0,04208 | FABP1     | fatty acid binding protein 1, liver                                                                                             |
| 1,225185332 | 0,34383 | 1,396678532 | 0,00186 | FADS1     | fatty acid desaturase 1                                                                                                         |
| 1,238848698 | 0,15399 | 1,204972315 | 0,01338 | FADS3     | fatty acid desaturase 3                                                                                                         |
| 0,622005827 | 0,06066 | 0,904379378 | 0,02928 | FAF1      | Fas (TNFRSF6) associated factor 1                                                                                               |
| 0,930449658 | 0,40055 | 0,853226098 | 0,0106  | FAF1      | Fas (TNFRSF6) associated factor 1                                                                                               |
| 0,723969086 | 0,06764 | 0,653835674 | 0       | FAHD1     | fumarylacetoacetate hydrolase domain containing 1                                                                               |
| 1,016774673 | 0,89118 | 1,130530567 | 0,02768 | FAHD2A    | fumarylacetoacetate hydrolase domain containing 2A                                                                              |
| 1,134455485 | 0,12288 | 1,196648963 | 0,00255 | FAM101A   | family with sequence similarity 101, member A                                                                                   |
| 0,739181216 | 0,10806 | 0,753667455 | 0,02585 | FAM103A1  | family with sequence similarity 103, member A1                                                                                  |
| 0,944092419 | 0,39368 | 0,840313752 | 0,00096 | FAM104B   | family with sequence similarity 104, member B                                                                                   |
| 0,886381699 | 0,14186 | 0,874784765 | 0,01514 | FAM104B   | family with sequence similarity 104, member B                                                                                   |
| 0,986916546 | 0,87629 | 1,122721422 | 0,03019 | FAM105A   | family with sequence similarity 105, member A                                                                                   |
| 1,207480591 | 0,24698 | 1,126619228 | 0,02235 | FAM105A   | family with sequence similarity 105, member A                                                                                   |
| 1,061423209 | 0,48679 | 1,175276328 | 0,01926 | FAM105B   | family with sequence similarity 105, member B                                                                                   |
| 1,164733586 | 0,05967 | 1,136029265 | 0,01462 | FAM107A   | family with sequence similarity 107, member A                                                                                   |
| 1,114193651 | 0,21303 | 1,152686347 | 0,03725 | FAM109B   | family with sequence similarity 109, member B                                                                                   |
| 1,078480432 | 0,49369 | 1,226884977 | 0,00143 | FAM111A   | family with sequence similarity 111, member A                                                                                   |
| 0,925946023 | 0,5993  | 1,209994089 | 0,0188  | FAM113A   | family with sequence similarity 113, member A                                                                                   |
| 0,909408252 | 0,51586 | 1,185092771 | 0,0433  | FAM115A   | family with sequence similarity 115, member A                                                                                   |
| 0,93109482  | 0,68956 | 0,846158597 | 0,02184 | FAM116A   | family with sequence similarity 116, member A                                                                                   |
| 0,942784536 | 0,73514 | 0,801069878 | 0,03768 | FAM117B   | family with sequence similarity 117, member B                                                                                   |
| 0,727994774 | 0,25175 | 0,748980467 | 0,00834 | FAM117B   | family with sequence similarity 117, member B                                                                                   |
| 0,891928519 | 0,58825 | 0,849684999 | 0,01126 | FAM118B   | family with sequence similarity 118, member B                                                                                   |
| 1,164733586 | 0,36199 | 1,149494848 | 0,03553 | FAM120A   | family with sequence similarity 120A                                                                                            |
| 0,925304428 | 0,81413 | 0,808881348 | 0,00258 | FAM120A   | family with sequence similarity 120A                                                                                            |
| 1,035264924 | 0,66472 | 1,189207115 | 0,007   | FAM120AOS | family with sequence similarity 120A opposite strand                                                                            |

|             |         |             |         |          |                                                |
|-------------|---------|-------------|---------|----------|------------------------------------------------|
| 0,860352631 | 0,45297 | 0,812252396 | 0,00356 | FAM120C  | family with sequence similarity 120C           |
| 0,934327347 | 0,74018 | 0,834509281 | 0,01519 | FAM122B  | family with sequence similarity 122B           |
| 1,040300267 | 0,87336 | 0,853817714 | 0,04357 | FAM122B  | family with sequence similarity 122B           |
| 1,186736798 | 0,16254 | 1,150291893 | 0,00382 | FAM122C  | family with sequence similarity 122C           |
| 1,099616149 | 0,24803 | 1,111879158 | 0,04784 | FAM125B  | family with sequence similarity 125, member B  |
| 0,863938187 | 0,51527 | 0,692554734 | 0,00058 | FAM126A  | family with sequence similarity 126, member A  |
| 0,768970416 | 0,16372 | 0,684441907 | 0,009   | FAM126A  | family with sequence similarity 126, member A  |
| 0,743291492 | 0,4013  | 0,607518396 | 0       | FAM126B  | family with sequence similarity 126, member B  |
| 0,771105413 | 0,27308 | 0,724973416 | 0,03015 | FAM126B  | family with sequence similarity 126, member B  |
| 0,858565436 | 0,08295 | 0,832757751 | 0,00577 | FAM134A  | family with sequence similarity 134, member A  |
| 0,846745312 | 0,05931 | 0,773782497 | 0,0003  | FAM134A  | family with sequence similarity 134, member A  |
| 0,807760778 | 0,31255 | 0,802181166 | 0,00918 | FAM134B  | family with sequence similarity 134, member B  |
| 0,635075491 | 0,07694 | 0,713507253 | 0,00108 | FAM135A  | family with sequence similarity 135, member A  |
| 1,024556823 | 0,82359 | 1,098092814 | 0,04472 | FAM135B  | family with sequence similarity 135, member B  |
| 1,263127262 | 0,07339 | 1,216722359 | 0,01737 | FAM13A   | family with sequence similarity 13, member A   |
| 0,841479482 | 0,43992 | 0,748980467 | 0,01538 | FAM13B   | family with sequence similarity 13, member B   |
| 1,194991205 | 0,07481 | 1,146312186 | 0,04472 | FAM149A  | family with sequence similarity 149, member A  |
| 0,922742493 | 0,46107 | 1,114193651 | 0,01672 | FAM151A  | family with sequence similarity 151, member A  |
| 1,176906737 | 0,12801 | 1,152686347 | 0,01229 | FAM153A  | family with sequence similarity 153, member A  |
| 1,093535457 | 0,37867 | 1,141554707 | 0,01373 | FAM154A  | family with sequence similarity 154, member A  |
| 1,466116757 | 0,055   | 1,148698355 | 0,01544 | FAM155A  | family with sequence similarity 155, member A  |
| 1,267512522 | 0,05419 | 1,215879283 | 0,00109 | FAM159A  | family with sequence similarity 159, member A  |
| 0,925304428 | 0,71909 | 0,798298386 | 0,02003 | FAM161A  | family with sequence similarity 161, member A  |
| 0,693515485 | 0,16957 | 0,569986636 | 0,00002 | FAM162A  | family with sequence similarity 162, member A  |
| 1,136816973 | 0,13081 | 1,126619228 | 0,03039 | FAM163A  | family with sequence similarity 163, member A  |
| 1,111879158 | 0,24006 | 1,191682575 | 0,00532 | FAM163A  | family with sequence similarity 163, member A  |
| 0,78132788  | 0,05699 | 0,763129604 | 0,00098 | FAM164A  | family with sequence similarity 164, member A  |
| 0,927873476 | 0,7541  | 0,760489377 | 0,00297 | FAM164A  | family with sequence similarity 164, member A  |
| 1,181811547 | 0,05167 | 1,163926534 | 0,00575 | FAM166B  | family with sequence similarity 166, member B  |
| 1,033114388 | 0,79621 | 0,889458994 | 0,02599 | FAM168A  | family with sequence similarity 168, member A  |
| 1,001387256 | 0,99188 | 0,743806881 | 0,00125 | FAM169A  | family with sequence similarity 169, member A  |
| 0,879649076 | 0,29857 | 0,831622098 | 0,01511 | FAM170A  | family with sequence similarity 170, member A  |
| 0,763129604 | 0,26191 | 0,764718139 | 0,00056 | FAM172A  | family with sequence similarity 172, member A  |
| 1,057018041 | 0,67797 | 0,755236293 | 0,00033 | FAM174A  | family with sequence similarity 174, member A  |
| 0,951977908 | 0,80414 | 0,702222438 | 0,00036 | FAM175A  | family with sequence similarity 175, member A  |
| 0,734075318 | 0,05034 | 0,798851916 | 0,03954 | FAM175B  | family with sequence similarity 175, member B  |
| 1,161508732 | 0,41507 | 1,262252032 | 0,00413 | FAM176B  | family with sequence similarity 176, member B  |
| 1,172834949 | 0,27137 | 1,272794935 | 0,00957 | FAM176B  | family with sequence similarity 176, member B  |
| 0,656560563 | 0,09868 | 0,644834125 | 0,00001 | FAM177A1 | family with sequence similarity 177, member A1 |
| 1,049716684 | 0,70852 | 1,281647924 | 0,00136 | FAM178B  | family with sequence similarity 178, member B  |
| 1,172834949 | 0,07965 | 1,140763716 | 0,01692 | FAM179A  | family with sequence similarity 179, member A  |
| 0,895025071 | 0,66095 | 0,748980467 | 0,00281 | FAM179B  | family with sequence similarity 179, member B  |
| 0,993781093 | 0,94612 | 0,923382311 | 0,04877 | FAM181B  | family with sequence similarity 181, member B  |
| 0,919550046 | 0,48842 | 1,121166078 | 0,02102 | FAM184B  | family with sequence similarity 184, member B  |
| 1,213353556 | 0,22729 | 1,292352831 | 0,00431 | FAM186B  | family with sequence similarity 186, member B  |
| 1,033114388 | 0,77783 | 0,852634892 | 0,03517 | FAM188A  | family with sequence similarity 188, member A  |
| 1,103433374 | 0,2913  | 1,194163187 | 0,00329 | FAM188B  | family with sequence similarity 188, member B  |
| 0,786217292 | 0,111   | 0,86339559  | 0,02206 | FAM189A2 | family with sequence similarity 189, member A2 |
| 0,959929261 | 0,83646 | 0,819036698 | 0,04439 | FAM188B1 | family with sequence similarity 188, member B1 |
| 0,758383773 | 0,21241 | 0,800514811 | 0,00199 | FAM190B  | family with sequence similarity 190, member B  |
| 0,839731493 | 0,26821 | 1,146312186 | 0,009   | FAM192A  | family with sequence similarity 192, member A  |
| 0,899378312 | 0,45583 | 1,118837101 | 0,0434  | FAM193B  | family with sequence similarity 193, member B  |
| 1,120389214 | 0,39648 | 1,25353302  | 0,00392 | FAM195A  | family with sequence similarity 195, member A  |
| 1,155886707 | 0,21361 | 1,221793102 | 0,00782 | FAM195B  | family with sequence similarity 195, member B  |
| 0,919550046 | 0,68795 | 0,868742185 | 0,03749 | FAM199X  | family with sequence similarity 199, X-linked  |
| 0,934975198 | 0,78337 | 0,816768991 | 0,00476 | FAM199X  | family with sequence similarity 199, X-linked  |
| 0,77546036  | 0,0996  | 0,772175133 | 0,00378 | FAM200A  | family with sequence similarity 200, member A  |
| 0,752101876 | 0,06091 | 0,752101876 | 0,00939 | FAM200A  | family with sequence similarity 200, member A  |
| 0,863938187 | 0,48121 | 0,757333158 | 0,01355 | FAM200B  | family with sequence similarity 200, member B  |
| 1,066585781 | 0,61697 | 1,173648178 | 0,00736 | FAM203A  | family with sequence similarity 203, member A  |
| 1,062159186 | 0,52131 | 0,866937564 | 0,01385 | FAM204A  | family with sequence similarity 204, member A  |
| 0,76630998  | 0,20782 | 0,752101876 | 0,00986 | FAM204A  | family with sequence similarity 204, member A  |
| 0,986232704 | 0,87784 | 1,17609125  | 0,01425 | FAM205A  | family with sequence similarity 205, member A  |
| 1,103433374 | 0,25263 | 1,131314463 | 0,02238 | FAM205B  | transmembrane protein C9orf144B pseudogene     |
| 1,623379162 | 0,08684 | 1,756860936 | 0       | FAM20A   | family with sequence similarity 20, member A   |
| 1,540074348 | 0,10012 | 1,480413298 | 0,02802 | FAM20A   | family with sequence similarity 20, member A   |
| 1,51887169  | 0,16435 | 1,537940831 | 0,00103 | FAM20A   | family with sequence similarity 20, member A   |
| 0,772175133 | 0,30001 | 0,725476104 | 0,00032 | FAM20B   | family with sequence similarity 20, member B   |
| 0,685391402 | 0,06599 | 0,785672517 | 0       | FAM20B   | family with sequence similarity 20, member B   |
| 1,498999602 | 0,1027  | 1,571345033 | 0,00028 | FAM20C   | family with sequence similarity 20, member C   |
| 1,182631    | 0,14629 | 1,243149669 | 0,00064 | FAM20C   | family with sequence similarity 20, member C   |
| 1,147902414 | 0,14723 | 1,25875174  | 0,01722 | FAM26E   | family with sequence similarity 26, member E   |
| 0,741233505 | 0,08585 | 0,910038824 | 0,03242 | FAM32A   | family with sequence similarity 32, member A   |
| 0,801069878 | 0,14857 | 0,768970416 | 0,00013 | FAM35A   | family with sequence similarity 35, member A   |
| 0,768437591 | 0,12425 | 0,793333843 | 0,00326 | FAM36A   | family with sequence similarity 36, member A   |
| 0,865736566 | 0,30002 | 0,74277646  | 0,02883 | FAM3D    | family with sequence similarity 3, member D    |
| 0,756808396 | 0,05365 | 0,853817714 | 0,01358 | FAM40A   | family with sequence similarity 40, member A   |
| 1,250062303 | 0,19745 | 1,197478705 | 0,04172 | FAM40B   | family with sequence similarity 40, member B   |
| 0,785672517 | 0,05175 | 0,727490342 | 0,00355 | FAM43A   | family with sequence similarity 43, member A   |
| 0,775930854 | 0,31177 | 0,793883931 | 0,00097 | FAM45A   | family with sequence similarity 45, member A   |
| 1,135242102 | 0,15908 | 1,134455485 | 0,01154 | FAM46A   | family with sequence similarity 46, member A   |
| 0,748980467 | 0,32056 | 1,234562607 | 0,03942 | FAM50A   | family with sequence similarity 50, member A   |
| 1,154285418 | 0,11035 | 1,106497353 | 0,02242 | FAM53B   | family with sequence similarity 53, member B   |
| 0,926588062 | 0,32189 | 0,886996305 | 0,04591 | FAM58A   | family with sequence similarity 58, member A   |
| 0,563309614 | 0,10558 | 0,534032704 | 0,00007 | FAM59A   | family with sequence similarity 59, member A   |
| 1,176906737 | 0,17298 | 1,16634937  | 0,00784 | FAM59B   | family with sequence similarity 59, member B   |
| 0,953298545 | 0,61084 | 1,162314108 | 0,01608 | FAM59B   | family with sequence similarity 59, member B   |
| 0,695440986 | 0,18836 | 0,685866644 | 0,00269 | FAM60A   | family with sequence similarity 60, member A   |
| 1,157490217 | 0,4967  | 1,209155676 | 0,01977 | FAM65A   | family with sequence similarity 65, member A   |
| 1,132098902 | 0,40543 | 1,28788163  | 0,00011 | FAM65A   | family with sequence similarity 65, member A   |
| 1,20163605  | 0,2087  | 1,147107024 | 0,04806 | FAM65A   | family with sequence similarity 65, member A   |
| 1,368883813 | 0,07602 | 1,295940965 | 0,01064 | FAM69A   | family with sequence similarity 69, member A   |
| 1,242288282 | 0,08729 | 1,207480591 | 0,0373  | FAM70B   | family with sequence similarity 70, member B   |
| 0,976031761 | 0,83155 | 1,160703914 | 0,00483 | FAM71B   | family with sequence similarity 71, member B   |
| 1,092777739 | 0,23627 | 1,20664392  | 0,00161 | FAM71B   | family with sequence similarity 71, member B   |
| 1,033830736 | 0,70081 | 1,231144413 | 0,00069 | FAM71D   | family with sequence similarity 71, member D   |
| 1,148698355 | 0,24243 | 1,112650121 | 0,02184 | FAM71E2  | family with sequence similarity 71, member E2  |
| 1,058484395 | 0,52796 | 1,125838586 | 0,02404 | FAM71F1  | family with sequence similarity 71, member F1  |
| 0,918276162 | 0,64208 | 0,792784137 | 0,00676 | FAM76A   | family with sequence similarity 76, member A   |
| 0,651122095 | 0,13166 | 0,645728675 | 0,01478 | FAM76A   | family with sequence similarity 76, member A   |
| 0,76950361  | 0,43897 | 0,686818117 | 0,03083 | FAM76B   | family with sequence similarity 76, member B   |
| 0,903752727 | 0,64577 | 0,801069878 | 0,0177  | FAM76B   | family with sequence similarity 76, member B   |
| 1,087488391 | 0,55368 | 1,189207115 | 0,00425 | FAM78B   | family with sequence similarity 78, member B   |
| 1,025978145 | 0,83219 | 1,195819797 | 0,02841 | FAM81A   | family with sequence similarity 81, member A   |

|             |         |             |         |         |                                                                             |
|-------------|---------|-------------|---------|---------|-----------------------------------------------------------------------------|
| 0,920825697 | 0,63557 | 0,780786493 | 0,00164 | FAM82B  | family with sequence similarity 82, member B                                |
| 0,808320869 | 0,39969 | 0,758383773 | 0,00585 | FAM83A  | family with sequence similarity 83, member A                                |
| 0,675018993 | 0,15028 | 0,779704843 | 0,01146 | FAM83H  | family with sequence similarity 83, member H                                |
| 0,729510172 | 0,08239 | 0,77916458  | 0,01138 | FAM84A  | family with sequence similarity 84, member A                                |
| 0,706127202 | 0,22062 | 0,706616822 | 0,00429 | FAM84A  | family with sequence similarity 84, member A                                |
| 1,001387256 | 0,9929  | 0,748980467 | 0,00518 | FAM84A  | family with sequence similarity 84, member A                                |
| 0,802737389 | 0,30727 | 0,749499801 | 0,01024 | FAM84B  | family with sequence similarity 84, member B                                |
| 1,091263877 | 0,43374 | 1,140763716 | 0,01824 | FAM87A  | family with sequence similarity 87, member A                                |
| 0,741233505 | 0,37194 | 0,538493188 | 0,00004 | FAM98A  | family with sequence similarity 98, member A                                |
| 0,852634892 | 0,26839 | 0,767905135 | 0,00467 | FAM98A  | family with sequence similarity 98, member A                                |
| 0,832775771 | 0,27042 | 0,760489377 | 0,00104 | FAM98B  | family with sequence similarity 98, member B                                |
| 1,106497353 | 0,23984 | 1,137605228 | 0,02302 | FANCA   | Fanconi anemia, complementation group A                                     |
| 1,136816973 | 0,26816 | 1,2397077   | 0,00185 | FANCC   | Fanconi anemia, complementation group C                                     |
| 1,17609125  | 0,17177 | 1,153485605 | 0,03822 | FANCG   | Fanconi anemia, complementation group G                                     |
| 0,757858283 | 0,06306 | 0,765778999 | 0,00043 | FANCI   | Fanconi anemia, complementation group I                                     |
| 1,043188594 | 0,68633 | 0,276328769 | 0,00525 | FANCI   | Fanconi anemia, complementation group I                                     |
| 0,76418826  | 0,14917 | 0,724471077 | 0,00222 | FANCL   | Fanconi anemia, complementation group L                                     |
| 0,886381699 | 0,21911 | 0,849096246 | 0,03996 | FANCM   | Fanconi anemia, complementation group M                                     |
| 0,927873476 | 0,6113  | 0,774319028 | 0,0008  | FANCM   | Fanconi anemia, complementation group M                                     |
| 0,789493887 | 0,1245  | 0,811127156 | 0,0059  | FANK1   | fibronectin type III and ankyrin repeat domains 1                           |
| 1,262252032 | 0,11258 | 1,508380077 | 0,0189  | FAP     | fibroblast activation protein, alpha                                        |
| 0,746389192 | 0,15616 | 0,808881348 | 0,02125 | FAR1    | fatty acyl CoA reductase 1                                                  |
| 1,051901779 | 0,63486 | 1,121166078 | 0,01266 | FARP1   | FERM, RhoGEF (ARHGEF) and pleckstrin domain protein 1 (chondrocyte-derived) |
| 1,212512819 | 0,17066 | 1,292352831 | 0,00076 | FARP1   | FERM, RhoGEF (ARHGEF) and pleckstrin domain protein 1 (chondrocyte-derived) |
| 0,933032992 | 0,83363 | 0,633317127 | 0,00001 | FARSB   | phenylalanyl-tRNA synthetase, beta subunit                                  |
| 0,675018993 | 0,1382  | 0,698339266 | 0,03497 | FAS     | Fas (TNF receptor superfamily, member 6)                                    |
| 0,827596816 | 0,43008 | 0,711038705 | 0,02197 | FAS     | Fas (TNF receptor superfamily, member 6)                                    |
| 1,114193651 | 0,43444 | 1,240567298 | 0,00877 | FASTK   | Fas-activated serine/threonine kinase                                       |
| 0,1032569   | 0,93841 | 1,143138335 | 0,04802 | FASTK   | Fas-activated serine/threonine kinase                                       |
| 1,016070143 | 0,91492 | 1,185092771 | 0,00189 | FASTK   | Fas-activated serine/threonine kinase                                       |
| 0,915733686 | 0,58108 | 0,751059963 | 0,00623 | FASTKD2 | FAST kinase domains 2                                                       |
| 0,899378312 | 0,4987  | 0,704172113 | 0,00011 | FASTKD3 | FAST kinase domains 3                                                       |
| 0,717474767 | 0,09565 | 0,831622098 | 0,03036 | FASTKDS | FAST kinase domains 5                                                       |
| 0,993781093 | 0,9717  | 0,794985251 | 0,04138 | FAT1    | FAT tumor suppressor homolog 1 (Drosophila)                                 |
| 1,177227279 | 0,1494  | 1,29145735  | 0,00004 | FATE1   | fetal and adult testis expressed 1                                          |
| 1,271913007 | 0,20374 | 1,327765158 | 0,00703 | FBLN1   | fibulin 1                                                                   |
| 1,216722359 | 0,58797 | 1,303147149 | 0,04618 | FBLN1   | fibulin 1                                                                   |
| 1,107264584 | 0,46864 | 1,143138335 | 0,03235 | FBLN1   | fibulin 1                                                                   |
| 0,977385766 | 0,90335 | 1,319507911 | 0,00886 | FBLN2   | fibulin 2                                                                   |
| 1,171210181 | 0,48066 | 1,384149716 | 0,00299 | FBLN5   | fibulin 5                                                                   |
| 1,071030823 | 0,7751  | 1,41029796  | 0,04408 | FBN1    | fibrillin 1                                                                 |
| 1,481439798 | 0,05058 | 1,48246701  | 0,01357 | FBN1    | fibrillin 1                                                                 |
| 1,38991822  | 0,17368 | 1,325007017 | 0,01836 | FBN1    | fibrillin 1                                                                 |
| 0,781869643 | 0,38    | 0,815072332 | 0,0289  | FBRSL1  | fibrosin-like 1                                                             |
| 0,987600861 | 0,92353 | 0,844400887 | 0,00683 | FBRSL1  | fibrosin-like 1                                                             |
| 1,086734863 | 0,39226 | 1,170398641 | 0,00319 | FBRSL1  | fibrosin-like 1                                                             |
| 0,852044095 | 0,12996 | 0,85797053  | 0,00949 | FBXL14  | F-box and leucine-rich repeat protein 14                                    |
| 0,940174203 | 0,56895 | 0,740206649 | 0,00113 | FBXL16  | F-box and leucine-rich repeat protein 16                                    |
| 0,977385766 | 0,92034 | 0,834509281 | 0,02159 | FBXL17  | F-box and leucine-rich repeat protein 17                                    |
| 1,001387256 | 0,98664 | 0,898755127 | 0,03729 | FBXL17  | F-box and leucine-rich repeat protein 17                                    |
| 1,285206337 | 0,06258 | 1,350037985 | 0,00081 | FBXL18  | F-box and leucine-rich repeat protein 18                                    |
| 1,267512522 | 0,108   | 1,278985581 | 0,00297 | FBXL18  | F-box and leucine-rich repeat protein 18                                    |
| 0,933032992 | 0,60964 | 0,754712984 | 0,00511 | FBXL4   | F-box and leucine-rich repeat protein 4                                     |
| 0,85797053  | 0,3383  | 0,782954296 | 0,00433 | FBXL5   | F-box and leucine-rich repeat protein 5                                     |
| 1,051901779 | 0,73545 | 0,837406488 | 0,00348 | FBXO11  | F-box protein 11                                                            |
| 0,890075733 | 0,42339 | 0,84323111  | 0,00805 | FBXO11  | F-box protein 11                                                            |
| 1,284315809 | 0,14353 | 1,256142381 | 0,0067  | FBXO18  | F-box protein, helicase, 18                                                 |
| 1,22010051  | 0,10077 | 1,155886707 | 0,01398 | FBXO2   | F-box protein 2                                                             |
| 1,114193651 | 0,767   | 0,784584098 | 0,00807 | FBXO21  | F-box protein 21                                                            |
| 0,839149637 | 0,14253 | 0,853817714 | 0,02221 | FBXO21  | F-box protein 21                                                            |
| 1,117287138 | 0,58369 | 0,867538687 | 0,02707 | FBXO22  | F-box protein 22                                                            |
| 0,831622098 | 0,28655 | 0,772175133 | 0,01802 | FBXO28  | F-box protein 28                                                            |
| 0,818469182 | 0,22004 | 0,808881348 | 0,04954 | FBXO28  | F-box protein 28                                                            |
| 0,593368399 | 0,07821 | 0,610896551 | 0,00011 | FBXO3   | F-box protein 3                                                             |
| 0,911933166 | 0,36995 | 0,867538687 | 0,00134 | FBXO3   | F-box protein 3                                                             |
| 0,958599438 | 0,80811 | 0,713507253 | 0,00424 | FBXO30  | F-box protein 30                                                            |
| 1,119612889 | 0,19886 | 1,164733586 | 0,03892 | FBXO31  | F-box protein 31                                                            |
| 1,035264924 | 0,83503 | 0,792234811 | 0,00317 | FBXO33  | F-box protein 33                                                            |
| 0,936921447 | 0,76996 | 0,802737389 | 0,00881 | FBXO38  | F-box protein 38                                                            |
| 0,804408371 | 0,0697  | 0,880259014 | 0,02124 | FBXO38  | F-box protein 38                                                            |
| 0,911933166 | 0,37202 | 0,906261938 | 0,03719 | FBXO42  | F-box protein 42                                                            |
| 0,717474767 | 0,05574 | 0,729004689 | 0       | FBXO45  | F-box protein 45                                                            |
| 0,956608158 | 0,77565 | 0,820741609 | 0,01903 | FBXO5   | F-box protein 5                                                             |
| 0,8362464   | 0,24444 | 0,735093668 | 0,03621 | FBXO8   | F-box protein 8                                                             |
| 0,856188285 | 0,52672 | 0,772175133 | 0,00041 | FBXO8   | F-box protein 8                                                             |
| 0,744322628 | 0,13348 | 0,806641759 | 0,03188 | FBXO9   | F-box protein 9                                                             |
| 0,751580739 | 0,18507 | 0,798851916 | 0,0342  | FBXO9   | F-box protein 9                                                             |
| 0,911933166 | 0,57365 | 0,825877665 | 0,00649 | FBXO9   | F-box protein 9                                                             |
| 0,748461493 | 0,29943 | 0,797192477 | 0,00083 | FBXO9   | F-box protein 9                                                             |
| 0,870550563 | 0,41235 | 0,895025071 | 0,02554 | FBXO9   | F-box protein 9                                                             |
| 1,025978145 | 0,79538 | 0,912565489 | 0,02958 | FBXW2   | F-box and WD repeat domain containing 2                                     |
| 0,720964436 | 0,08763 | 0,649769531 | 0,00007 | FBXW2   | F-box and WD repeat domain containing 2                                     |
| 1,194991205 | 0,36491 | 1,618884433 | 0,00447 | FCER1G  | Fc fragment of IgE, high affinity I, receptor for; gamma polypeptide        |
| 1,361314116 | 0,06987 | 1,639209215 | 0,00001 | FCER1G  | Fc fragment of IgE, high affinity I, receptor for; gamma polypeptide        |
| 1,041021598 | 0,62478 | 1,121943481 | 0,01645 | FCER2   | Fc fragment of IgE, low affinity II, receptor for (CD23)                    |
| 0,912565489 | 0,63406 | 0,768970416 | 0,01554 | FCF1    | FCF1 small subunit (SSU) processome component homolog (S. cerevisiae)       |
| 0,889458994 | 0,24109 | 0,815637493 | 0,0008  | FCF1    | FCF1 small subunit (SSU) processome component homolog (S. cerevisiae)       |
| 1,021720083 | 0,71567 | 1,109569472 | 0,01838 | FCGR1A  | Fc fragment of IgG, high affinity Ia, receptor (CD64)                       |
| 1,424050196 | 0,10575 | 1,417157397 | 0,00691 | FCGR2C  | Fc fragment of IgG, low affinity IIc, receptor for (CD32) (gene/pseudogene) |
| 1,295940965 | 0,20806 | 1,514666316 | 0,00002 | FCGR2   | Fc fragment of IgG, receptor, transporter, alpha                            |
| 0,796640096 | 0,24705 | 0,712518807 | 0,01758 | FCHO2   | FCH domain only 2                                                           |
| 1,143138335 | 0,18112 | 1,209994089 | 0,00892 | FCN3    | ficolin (collagen/fibrinogen domain containing) 3 (Hakata antigen)          |
| 1,136816973 | 0,11123 | 1,218410264 | 0,00232 | FCRL3   | Fc receptor-like 3                                                          |
| 1,104198847 | 0,17594 | 1,125058485 | 0,03598 | FCRL4   | Fc receptor-like 4                                                          |
| 0,805524291 | 0,12979 | 0,771640088 | 0,01072 | FDFT1   | farnesyl-diphosphate farnesyltransferase 1                                  |
| 0,883927531 | 0,23531 | 0,901250463 | 0,02975 | FDPS    | farnesyl diphosphate synthase                                               |
| 1,176906737 | 0,2082  | 0,90062598  | 0,01825 | FDX1    | ferredoxin 1                                                                |
| 0,891310496 | 0,41589 | 0,807760778 | 0,02629 | FEM1A   | fem-1 homolog a (C. elegans)                                                |
| 0,729004689 | 0,10097 | 0,834509281 | 0,0301  | FER     | fer (fps/fes related) tyrosine kinase                                       |
| 1,115739322 | 0,41962 | 1,131314463 | 0,03597 | FERD3L  | Fer3-like (Drosophila)                                                      |
| 0,732550437 | 0,17431 | 0,823591017 | 0,00558 | FERMT1  | fermitin family member 1                                                    |
| 1,22010051  | 0,06851 | 1,210833084 | 0,00739 | FES     | feline sarcoma oncogene                                                     |
| 1,084477409 | 0,3992  | 1,146312186 | 0,02283 | FEV     | FEV (ETS oncogene family)                                                   |
| 1,119612889 | 0,26256 | 1,185914499 | 0,01383 | FGA     | fibrinogen alpha chain                                                      |

|             |         |             |         |          |                                                                                                          |
|-------------|---------|-------------|---------|----------|----------------------------------------------------------------------------------------------------------|
| 1,063632673 | 0,43798 | 1,216722359 | 0,02031 | FGA      | fibrinogen alpha chain                                                                                   |
| 1,176906737 | 0,09182 | 1,147902414 | 0,01259 | FGB      | fibrinogen beta chain                                                                                    |
| 1,396678532 | 0,08632 | 1,325007017 | 0,00001 | FGD2     | FYVE, RhoGEF and PH domain containing 2                                                                  |
| 1,096571589 | 0,33481 | 1,158292806 | 0,01834 | FGD3     | FYVE, RhoGEF and PH domain containing 3                                                                  |
| 0,758383773 | 0,27306 | 0,804966138 | 0,01946 | FGD4     | FYVE, RhoGEF and PH domain containing 4                                                                  |
| 0,906261938 | 0,56359 | 0,739693755 | 0,00529 | FGD4     | FYVE, RhoGEF and PH domain containing 4                                                                  |
| 1,027401439 | 0,82259 | 1,246601194 | 0,00292 | FGF11    | fibroblast growth factor 11                                                                              |
| 0,831622098 | 0,23956 | 0,759435845 | 0,00117 | FGF12    | fibroblast growth factor 12                                                                              |
| 0,980099415 | 0,74508 | 1,099616149 | 0,03675 | FGF14    | fibroblast growth factor 14                                                                              |
| 1,229438867 | 0,11297 | 1,269270886 | 0,00275 | FGF2     | fibroblast growth factor 2 (basic)                                                                       |
| 1,221793102 | 0,09737 | 1,264879542 | 0,00145 | FGF22    | fibroblast growth factor 22                                                                              |
| 1,016774673 | 0,8926  | 1,122721422 | 0,04275 | FGF23    | fibroblast growth factor 23                                                                              |
| 0,907519155 | 0,51951 | 1,090507733 | 0,03103 | FGF5     | fibroblast growth factor 5                                                                               |
| 1,146312186 | 0,08931 | 1,183451022 | 0,00906 | FGF6     | fibroblast growth factor 6                                                                               |
| 1,128182137 | 0,21281 | 1,194991205 | 0,00269 | FGFR1    | fibroblast growth factor receptor 1                                                                      |
| 1,114193651 | 0,5264  | 1,319507911 | 0,0084  | FGFR1    | fibroblast growth factor receptor 1                                                                      |
| 1,218410264 | 0,15265 | 1,204137381 | 0,03347 | FGFR1    | fibroblast growth factor receptor 1                                                                      |
| 0,891928519 | 0,59848 | 0,760489377 | 0,02602 | FGFR1OP2 | FGFR1 oncogene partner 2                                                                                 |
| 1,00556058  | 0,96284 | 1,185092771 | 0,0221  | FGFR2    | fibroblast growth factor receptor 2                                                                      |
| 0,849684999 | 0,18088 | 0,784584098 | 0,00729 | FGFR2    | fibroblast growth factor receptor 2                                                                      |
| 1,054091423 | 0,64476 | 1,125838586 | 0,03344 | FGFR4    | fibroblast growth factor receptor 4                                                                      |
| 0,927230546 | 0,25051 | 0,904379378 | 0,04158 | FGGY     | FGGY carbohydrate kinase domain containing                                                               |
| 0,812815602 | 0,06128 | 0,811689581 | 0,00066 | FH       | fumarate hydratase                                                                                       |
| 1,060687741 | 0,55571 | 1,134455485 | 0,01301 | FHAD1    | forkhead-associated (FHA) phosphopeptide binding domain 1                                                |
| 1,129747215 | 0,20754 | 1,126619228 | 0,0214  | FHAD1    | forkhead-associated (FHA) phosphopeptide binding domain 1                                                |
| 1,129747215 | 0,1962  | 1,143138335 | 0,00329 | FHAD1    | forkhead-associated (FHA) phosphopeptide binding domain 1                                                |
| 1,092020546 | 0,42261 | 1,176906737 | 0,01762 | FHIT     | fragile histidine triad gene                                                                             |
| 1,36983298  | 0,0633  | 1,355664327 | 0,01105 | FHL1     | four and a half LIM domains 1                                                                            |
| 1,118837101 | 0,45823 | 1,203303026 | 0,03691 | FHOD1    | formin homology 2 domain containing 1                                                                    |
| 1,372684431 | 0,14809 | 1,350037985 | 0,04468 | FHOD3    | formin homology 2 domain containing 3                                                                    |
| 1,194163187 | 0,368   | 1,194991205 | 0,03311 | FIBIN    | fin bud initiation factor homolog (zebrafish)                                                            |
| 1,057750964 | 0,47188 | 1,127400412 | 0,00713 | FIGLA    | folliculogenesis specific basic helix-loop-helix                                                         |
| 0,712025098 | 0,20814 | 0,600401714 | 0       | FIGL1    | figletin-like 1                                                                                          |
| 0,811127156 | 0,11693 | 0,84323111  | 0,02817 | FIP1L1   | FIP1 like 1 (S. cerevisiae)                                                                              |
| 1,20664392  | 0,21324 | 1,246601194 | 0,02452 | FIZ1     | FLT3-interacting zinc finger 1                                                                           |
| 0,993092495 | 0,96532 | 0,888226796 | 0,04124 | FKBP14   | FK506 binding protein 14, 22 kDa                                                                         |
| 1,221793102 | 0,36034 | 1,364147835 | 0,00011 | FKBP2    | FK506 binding protein 2, 13kDa                                                                           |
| 0,817902059 | 0,23978 | 0,8362464   | 0,04341 | FKTN     | fukutin                                                                                                  |
| 1,197478705 | 0,17126 | 1,132883885 | 0,0403  | FLCN     | folliculin                                                                                               |
| 1,448942155 | 0,05202 | 1,498999602 | 0,00788 | FLI1     | Friend leukemia virus integration 1                                                                      |
| 0,97063447  | 0,83779 | 1,154285418 | 0,01406 | FLII     | flightless I homolog (Drosophila)                                                                        |
| 0,908148418 | 0,21883 | 0,830470024 | 0,01644 | FLJ10038 | hypothetical protein FLJ10038                                                                            |
| 0,853817714 | 0,405   | 0,660211421 | 0,00035 | FLJ10038 | hypothetical protein FLJ10038                                                                            |
| 1,110338834 | 0,4096  | 0,792784137 | 0,0007  | FLJ10038 | hypothetical protein FLJ10038                                                                            |
| 1,033114388 | 0,7274  | 1,092777739 | 0,02345 | FLJ16124 | FLJ16124 protein                                                                                         |
| 1,076240125 | 0,31283 | 1,143138335 | 0,00818 | FLJ21369 | hypothetical protein FLJ21369                                                                            |
| 1,071030823 | 0,43637 | 1,114193651 | 0,03395 | FLJ21408 | hypothetical LOC400512                                                                                   |
| 0,910038824 | 0,25696 | 0,796088099 | 0,00245 | FLJ25917 | hypothetical LOC401585                                                                                   |
| 1,080725402 | 0,40072 | 1,118837101 | 0,04877 | FLJ31104 | hypothetical LOC441072                                                                                   |
| 1,143138335 | 0,19579 | 1,141554707 | 0,01434 | FLJ31958 | hypothetical LOC143153                                                                                   |
| 1,074749173 | 0,60887 | 1,129747215 | 0,03442 | FLJ32154 | hypothetical protein FLJ32154                                                                            |
| 1,038859103 | 0,5806  | 1,155085785 | 0,01279 | FLJ32790 | hCG1983896                                                                                               |
| 0,990342872 | 0,88939 | 1,113421618 | 0,03973 | FLJ33065 | hypothetical LOC440952                                                                                   |
| 1,148698355 | 0,10815 | 1,237132479 | 0,00119 | FLJ33065 | hypothetical LOC440952                                                                                   |
| 1,106497353 | 0,30916 | 1,111879158 | 0,03776 | FLJ33544 | hypothetical LOC728283                                                                                   |
| 0,670821112 | 0,11954 | 0,652025368 | 0,00002 | FLJ33630 | hypothetical LOC644873                                                                                   |
| 1,040300267 | 0,68538 | 1,161508732 | 0,02292 | FLJ34208 | hypothetical LOC401106                                                                                   |
| 1,074004472 | 0,33181 | 1,137605228 | 0,00743 | FLJ34208 | hypothetical LOC401106                                                                                   |
| 1,003471749 | 0,97418 | 1,115739322 | 0,02458 | FLJ35024 | hypothetical LOC401491                                                                                   |
| 1,108032348 | 0,22754 | 1,244011653 | 0,00131 | FLJ35390 | hypothetical LOC255031                                                                                   |
| 0,981459064 | 0,93662 | 0,76418826  | 0,03391 | FLJ35934 | FLJ35934                                                                                                 |
| 1,011853201 | 0,90932 | 1,119612889 | 0,02969 | FLJ36116 | hypothetical locus LOC388666                                                                             |
| 1,126619228 | 0,19218 | 1,136029265 | 0,03995 | FLJ37638 | hypothetical LOC400660                                                                                   |
| 1,149494848 | 0,05439 | 1,07997656  | 0,02542 | FLJ39051 | hypothetical LOC399972                                                                                   |
| 1,147107024 | 0,10673 | 1,328685814 | 0       | FLJ39582 | hypothetical LOC439931                                                                                   |
| 1,128964405 | 0,39683 | 1,191682575 | 0,01993 | FLJ39739 | hypothetical FLJ39739                                                                                    |
| 1,029540083 | 0,70795 | 1,07549439  | 0,04699 | FLJ39739 | hypothetical FLJ39739                                                                                    |
| 1,16634937  | 0,1825  | 1,227735684 | 0,01782 | FLJ39739 | hypothetical FLJ39739                                                                                    |
| 1,136029265 | 0,16085 | 1,179356592 | 0,00784 | FLJ40288 | hypothetical FLJ40288                                                                                    |
| 1,071030823 | 0,47595 | 1,219255094 | 0,00564 | FLJ40292 | hypothetical LOC643210                                                                                   |
| 1,068065408 | 0,53966 | 1,210833084 | 0,00106 | FLJ42627 | hypothetical LOC645644                                                                                   |
| 1,110338834 | 0,27262 | 1,169587664 | 0,03514 | FLJ42709 | hypothetical LOC441094                                                                                   |
| 1,025267238 | 0,84479 | 1,237132479 | 0,00112 | FLJ42875 | hypothetical LOC440556                                                                                   |
| 1,073260286 | 0,30283 | 1,104964485 | 0,02345 | FLJ42875 | hypothetical LOC440556                                                                                   |
| 1,115739322 | 0,63578 | 0,833353207 | 0,01254 | FLJ43489 | hypothetical protein LOC644283                                                                           |
| 1,101905116 | 0,30045 | 1,125058485 | 0,03911 | FLJ44054 | hypothetical LOC643365                                                                                   |
| 1,114966219 | 0,52986 | 1,182631    | 0,00965 | FLJ45340 | hypothetical LOC402483                                                                                   |
| 1,189207115 | 0,07161 | 1,157490217 | 0,01013 | FLJ45825 | hypothetical protein LOC646888                                                                           |
| 1,143930973 | 0,11474 | 1,157490217 | 0,00873 | FLJ90757 | hypothetical LOC440465                                                                                   |
| 1,237990291 | 0,07031 | 1,256142381 | 0,00185 | FLNC     | filamin C, gamma                                                                                         |
| 1,22858698  | 0,27559 | 1,333298677 | 0,00256 | FLOT1    | flotillin 1                                                                                              |
| 1,172022284 | 0,40058 | 1,398616083 | 0,0002  | FLOT1    | flotillin 1                                                                                              |
| 1,250062303 | 0,2133  | 1,350037985 | 0,00019 | FLOT1    | flotillin 1                                                                                              |
| 1,185092771 | 0,34794 | 1,313121125 | 0,01476 | FLOT2    | flotillin 2                                                                                              |
| 1,116512962 | 0,13495 | 1,147902414 | 0,01467 | FLRT1    | fibronectin leucine rich transmembrane protein 1                                                         |
| 1,17609125  | 0,25271 | 1,231144413 | 0,01049 | FLRT2    | fibronectin leucine rich transmembrane protein 2                                                         |
| 0,976031761 | 0,91666 | 0,67877249  | 0,00082 | FLRT3    | fibronectin leucine rich transmembrane protein 3                                                         |
| 0,927873476 | 0,79728 | 0,61813763  | 0,00006 | FLRT3    | fibronectin leucine rich transmembrane protein 3                                                         |
| 1,062159186 | 0,63533 | 1,21167266  | 0,01939 | FLT1     | fms-related tyrosine kinase 1 (vascular endothelial growth factor/vascular permeability factor receptor) |
| 1,247465572 | 0,11032 | 1,195819797 | 0,0133  | FLT1     | fms-related tyrosine kinase 1 (vascular endothelial growth factor/vascular permeability factor receptor) |
| 1,241427492 | 0,09276 | 1,327765158 | 0,00224 | FLT4     | fms-related tyrosine kinase 4                                                                            |
| 1,025267238 | 0,91611 | 0,750019495 | 0,00428 | FLVCR1   | feline leukemia virus subgroup C cellular receptor 1                                                     |
| 1,073260286 | 0,41259 | 1,17609125  | 0,00494 | FLYWCH1  | FLYWCH-type zinc finger 1                                                                                |
| 1,011152081 | 0,9252  | 1,210833084 | 0,03417 | FLYWCH1  | FLYWCH-type zinc finger 1                                                                                |
| 0,70514898  | 0,16908 | 0,740719899 | 0,00436 | FMNL2    | formin-like 2                                                                                            |
| 0,689680461 | 0,30433 | 0,753667455 | 0,02154 | FMO2     | flavin containing monooxygenase 2 (non-functional)                                                       |
| 1,402499251 | 0,06775 | 1,679462986 | 0,00001 | FMOD     | fibromodulin                                                                                             |
| 0,866336856 | 0,43516 | 0,774319028 | 0,00794 | FMR1     | fragile X mental retardation 1                                                                           |
| 0,868742185 | 0,54635 | 0,786762445 | 0,00361 | FMR1     | fragile X mental retardation 1                                                                           |
| 0,727994774 | 0,31365 | 0,759962428 | 0,00175 | FNBP1L   | formin binding protein 1-like                                                                            |
| 0,812815602 | 0,39594 | 0,723969806 | 0,00098 | FNBP4    | formin binding protein 4                                                                                 |
| 1,092777739 | 0,36988 | 1,148698355 | 0,02751 | FNDC3A   | fibronectin type III domain containing 3A                                                                |
| 1,360370852 | 0,09114 | 1,425037614 | 0,00064 | FNDC3B   | fibronectin type III domain containing 3B                                                                |
| 1,138394029 | 0,17449 | 1,20163605  | 0,01514 | FNDC5    | fibronectin type III domain containing 5                                                                 |

|             |         |             |         |           |                                                                                      |
|-------------|---------|-------------|---------|-----------|--------------------------------------------------------------------------------------|
| 1,143930973 | 0,2724  | 1,244011653 | 0,01293 | FNDC5     | fibronectin type III domain containing 5                                             |
| 1,231998073 | 0,09883 | 1,216722359 | 0,00603 | FNDC7     | fibronectin type III domain containing 7                                             |
| 0,986916546 | 0,90322 | 1,07549439  | 0,03303 | FNDC8     | fibronectin type III domain containing 8                                             |
| 1,050444544 | 0,84581 | 0,744322628 | 0,0265  | FNIP1     | folliculin interacting protein 1                                                     |
| 0,680657058 | 0,13065 | 0,687294348 | 0,0001  | FNIP2     | folliculin interacting protein 2                                                     |
| 0,727994774 | 0,13005 | 0,745872013 | 0,00141 | FNIP2     | folliculin interacting protein 2                                                     |
| 0,580754366 | 0,18408 | 0,71449707  | 0,00743 | FNTA      | farnesyltransferase, CAAX box, alpha                                                 |
| 0,886996305 | 0,54751 | 0,647521499 | 0,00004 | FNTA      | farnesyltransferase, CAAX box, alpha                                                 |
| 0,938871747 | 0,5069  | 0,86934456  | 0,01586 | FOLH1     | folate hydrolase (prostate-specific membrane antigen) 1                              |
| 1,208317843 | 0,11691 | 1,148698355 | 0,01434 | FOLH1     | folate hydrolase (prostate-specific membrane antigen) 1                              |
| 1,112650121 | 0,17539 | 1,142346247 | 0,03214 | FOLR1     | folate receptor 1 (adult)                                                            |
| 1,184271612 | 0,07037 | 1,246601194 | 0,00153 | FOLR3     | folate receptor 3 (gamma)                                                            |
| 0,919550046 | 0,21606 | 0,807201075 | 0,00089 | FONG      | hypothetical LOC348751                                                               |
| 1,068805991 | 0,49084 | 0,817335328 | 0,00371 | FONG      | hypothetical LOC348751                                                               |
| 0,688725023 | 0,06135 | 0,753667455 | 0,0001  | FOPNL     | FGFR1OP N-terminal like                                                              |
| 0,670821112 | 0,0774  | 0,703684188 | 0,03571 | FOPNL     | FGFR1OP N-terminal like                                                              |
| 1,063632673 | 0,61221 | 1,146312186 | 0,01602 | FOXA2     | forkhead box A2                                                                      |
| 1,07997656  | 0,53358 | 0,698823486 | 0,00389 | FOX1      | forkhead box D1                                                                      |
| 1,000693387 | 0,98996 | 0,874784765 | 0,0145  | FOX4      | forkhead box D4                                                                      |
| 1,078480432 | 0,31181 | 1,152686347 | 0,00064 | FOX3      | forkhead box E3                                                                      |
| 0,86934456  | 0,20342 | 0,824162085 | 0,00302 | FOX1      | forkhead box K1                                                                      |
| 1,074004472 | 0,32178 | 1,092777739 | 0,04546 | FOX1      | forkhead box K1                                                                      |
| 0,980099415 | 0,87971 | 0,84323111  | 0,03518 | FOX2      | forkhead box K2                                                                      |
| 1,130530567 | 0,18055 | 1,171210181 | 0,00122 | FOX1      | forkhead box L1                                                                      |
| 0,966606097 | 0,78106 | 1,209155676 | 0,01016 | FOX3      | forkhead box N3                                                                      |
| 0,833353207 | 0,57515 | 0,780786493 | 0,00675 | FOX3      | forkhead box N3                                                                      |
| 0,718470088 | 0,08936 | 0,825305409 | 0,01132 | FOX3      | forkhead box N3                                                                      |
| 1,155886707 | 0,11328 | 1,128182137 | 0,02503 | FOX4      | forkhead box N4                                                                      |
| 1,148698355 | 0,1579  | 1,198309021 | 0,00593 | FOX4      | forkhead box N4                                                                      |
| 1,098092814 | 0,30905 | 1,275444392 | 0,01217 | FOX1      | forkhead box O1                                                                      |
| 0,890692901 | 0,66791 | 0,856781955 | 0,02705 | FOX1      | forkhead box P1                                                                      |
| 0,807760778 | 0,12348 | 0,915099168 | 0,0314  | FOX1      | forkhead box P1                                                                      |
| 0,771105413 | 0,12831 | 0,854409741 | 0,00607 | FOX1      | forkhead box P1                                                                      |
| 0,762072415 | 0,18441 | 0,598234482 | 0,00115 | FOX2      | forkhead box P2                                                                      |
| 1,102669163 | 0,22164 | 1,140763716 | 0,00375 | FOX2      | forkhead box P2                                                                      |
| 1,020304659 | 0,88484 | 1,137605228 | 0,03663 | FOXRED1   | FAD-dependent oxidoreductase domain containing 1                                     |
| 1,038139271 | 0,74419 | 1,272794935 | 0,00209 | FOXRED2   | FAD-dependent oxidoreductase domain containing 2                                     |
| 1,234562607 | 0,08687 | 1,111879158 | 0,02294 | FOX1      | forkhead box S1                                                                      |
| 0,831045862 | 0,22179 | 0,803850991 | 0,01367 | FPGT      | fucose-1-phosphate guanylyltransferase                                               |
| 1,185914499 | 0,08123 | 1,127400412 | 0,03817 | FPR1      | formyl peptide receptor 1                                                            |
| 1,162314108 | 0,13431 | 1,129747215 | 0,01217 | FRAS1     | Fraser syndrome 1                                                                    |
| 1,053361036 | 0,62866 | 1,130530567 | 0,02791 | FRAS1     | Fraser syndrome 1                                                                    |
| 1,104964485 | 0,20311 | 1,094293701 | 0,04372 | FREM1     | FRAS1 related extracellular matrix 1                                                 |
| 0,988970916 | 0,86987 | 1,172022284 | 0,0097  | FRMD1     | FERM domain containing 1                                                             |
| 1,072516617 | 0,55398 | 1,151887642 | 0,00688 | FRMD3     | FERM domain containing 3                                                             |
| 0,645728675 | 0,12026 | 0,617709319 | 0,00002 | FRMD4B    | FERM domain containing 4B                                                            |
| 0,690637224 | 0,09055 | 0,76154437  | 0,0009  | FRMD6     | FERM domain containing 6                                                             |
| 1,098092814 | 0,19843 | 0,89688816  | 0,04283 | FRMD7     | FERM domain containing 7                                                             |
| 0,991029563 | 0,94774 | 1,2397077   | 0,00892 | FRS2      | fibroblast growth factor receptor substrate 2                                        |
| 0,657927263 | 0,08556 | 0,709561678 | 0,00045 | FRS2      | fibroblast growth factor receptor substrate 2                                        |
| 1,112650121 | 0,29895 | 1,198309021 | 0,00177 | FRS3      | fibroblast growth factor receptor substrate 3                                        |
| 1,175276328 | 0,11015 | 1,076240125 | 0,04965 | FSCB      | fibrous sheath CABYR binding protein                                                 |
| 1,147107024 | 0,15822 | 1,146312186 | 0,01201 | FSCN3     | fascin homolog 3, actin-bundling protein, testicular (Strongylocentrotus purpuratus) |
| 1,101141598 | 0,50731 | 1,185092771 | 0,00989 | FSTL1     | folliculin-like 1                                                                    |
| 1,027401439 | 0,81967 | 1,190856849 | 0,03059 | FSTL3     | folliculin-like 3 (secreted glycoprotein)                                            |
| 0,960594864 | 0,70599 | 1,112650121 | 0,04807 | FTCD      | formiminotransferase cyclodeaminase                                                  |
| 1,136816973 | 0,44344 | 1,366987452 | 0,00021 | FTH1      | ferritin, heavy polypeptide 1                                                        |
| 1,154285418 | 0,80341 | 1,497960934 | 0,00002 | FTL       | ferritin, light polypeptide                                                          |
| 1,034547582 | 0,79811 | 0,880869374 | 0,03299 | FTSJ1     | FtsJ homolog 1 (E. coli)                                                             |
| 0,878430468 | 0,57769 | 0,734584317 | 0,00047 | FTSD1     | FtsJ methyltransferase domain containing 1                                           |
| 1,111879158 | 0,19779 | 1,200803427 | 0,01052 | FUBP1     | far upstream element (FUSE) binding protein 1                                        |
| 0,885153765 | 0,49179 | 0,767373048 | 0,00572 | FUBP3     | far upstream element (FUSE) binding protein 3                                        |
| 0,974004269 | 0,81962 | 1,153485605 | 0,01803 | FUK       | fucokinase                                                                           |
| 0,967947027 | 0,72934 | 0,876605721 | 0,02643 | FUS       | fused in sarcoma                                                                     |
| 1,00765376  | 0,92862 | 0,893785162 | 0,02291 | FUT10     | fucosyltransferase 10 (alpha (1,3) fucosyltransferase)                               |
| 1,100378609 | 0,22129 | 1,245737416 | 0,02227 | FUT5      | fucosyltransferase 5 (alpha (1,3) fucosyltransferase)                                |
| 1,192508872 | 0,06775 | 1,167967395 | 0,00278 | FUT6      | fucosyltransferase 6 (alpha (1,3) fucosyltransferase)                                |
| 1,314031627 | 0,07979 | 1,280759861 | 0,00954 | FUT6      | fucosyltransferase 6 (alpha (1,3) fucosyltransferase)                                |
| 1,140763716 | 0,56009 | 1,375541818 | 0,0404  | FUT6      | fucosyltransferase 6 (alpha (1,3) fucosyltransferase)                                |
| 1,135242102 | 0,15631 | 1,155886707 | 0,01424 | FUT7      | fucosyltransferase 7 (alpha (1,3) fucosyltransferase)                                |
| 1,373636233 | 0,22592 | 1,52414483  | 0,00029 | FXYD5     | FXYD domain containing ion transport regulator 5                                     |
| 1,179356592 | 0,65822 | 1,506290467 | 0,0008  | FXYD5     | FXYD domain containing ion transport regulator 5                                     |
| 1,265756594 | 0,0669  | 1,236275261 | 0,02081 | FXYD6     | FXYD domain containing ion transport regulator 6                                     |
| 1,163926534 | 0,31054 | 1,354724977 | 0,01097 | FYB       | FYN binding protein                                                                  |
| 1,081474763 | 0,53212 | 1,190856849 | 0,00775 | FYCO1     | FYVE and coiled-coil domain containing 1                                             |
| 1,433955248 | 0,10619 | 1,572434584 | 0,00003 | FYN       | FYN oncogene related to SRC, FGR, YES                                                |
| 0,79940583  | 0,1508  | 0,767373048 | 0,00563 | FYTDD1    | forty-two-three domain containing 1                                                  |
| 0,631563631 | 0,16794 | 0,639936207 | 0,01345 | FYTDD1    | forty-two-three domain containing 1                                                  |
| 0,950659101 | 0,72044 | 0,690637224 | 0,00002 | FZD1      | frizzled family receptor 1                                                           |
| 1,199971382 | 0,2312  | 1,25353302  | 0,01094 | FZD2      | frizzled family receptor 2                                                           |
| 1,229438867 | 0,08205 | 1,29145735  | 0,00466 | FZD2      | frizzled family receptor 2                                                           |
| 1,220946513 | 0,18477 | 1,208317843 | 0,00653 | FZD3      | frizzled family receptor 3                                                           |
| 0,765778999 | 0,15433 | 0,582770599 | 0,00011 | FZD5      | frizzled family receptor 5                                                           |
| 1,098092814 | 0,36533 | 1,29056249  | 0,00005 | FZD8      | frizzled family receptor 8                                                           |
| 0,944092419 | 0,75005 | 0,824733549 | 0,03105 | FZD8      | frizzled family receptor 8                                                           |
| 0,910038824 | 0,39689 | 0,831622098 | 0,0042  | FZD8      | frizzled family receptor 8                                                           |
| 1,101905116 | 0,73693 | 0,775393206 | 0,02425 | G2E3      | G2/M-phase specific E3 ubiquitin protein ligase                                      |
| 0,767905135 | 0,2205  | 0,823591017 | 0,02679 | G3BP1     | GTPase activating protein (SH3 domain) binding protein 1                             |
| 0,891928519 | 0,43226 | 0,716977624 | 0,00097 | G3BP1     | GTPase activating protein (SH3 domain) binding protein 1                             |
| 1,092020546 | 0,60479 | 1,264003098 | 0,00521 | G6PC3     | glucose 6 phosphatase, catalytic, 3                                                  |
| 0,87175824  | 0,53902 | 0,768970416 | 0,03665 | GAB1      | GRB2-associated binding protein 1                                                    |
| 0,852634892 | 0,59002 | 0,777007269 | 0,00337 | GAB1      | GRB2-associated binding protein 1                                                    |
| 0,866937564 | 0,09284 | 0,872362706 | 0,01196 | GAB2      | GRB2-associated binding protein 2                                                    |
| 1,172834949 | 0,20995 | 1,307671349 | 0,00229 | GAB3      | GRB2-associated binding protein 3                                                    |
| 1,172834949 | 0,22974 | 1,182631    | 0,00758 | GABARAPL1 | GABA(A) receptor-associated protein like 1                                           |
| 0,870550563 | 0,3891  | 1,207480591 | 0,0345  | GABRR1    | gamma-aminobutyric acid (GABA) B receptor, 1                                         |
| 1,077733145 | 0,39741 | 1,126619228 | 0,00501 | GABRA1    | gamma-aminobutyric acid (GABA) A receptor, alpha 1                                   |
| 0,987600861 | 0,85709 | 1,155886707 | 0,00889 | GABRB2    | gamma-aminobutyric acid (GABA) A receptor, beta 2                                    |
| 1,062159186 | 0,47561 | 1,187559666 | 0,00124 | GAD2      | glutamate decarboxylase 2 (pancreatic islets and brain, 65kDa)                       |
| 0,933679945 | 0,64979 | 1,314031627 | 0,03077 | GADD45B   | growth arrest and DNA-damage-inducible, beta                                         |
| 1,146312186 | 0,22735 | 1,139973273 | 0,02168 | GAGE1     | G antigen 1                                                                          |
| 0,969289817 | 0,79123 | 1,117287138 | 0,03525 | GAL3ST1   | galactose-3-O-sulfotransferase 1                                                     |
| 1,0238469   | 0,73965 | 1,169587664 | 0,00072 | GAL3ST2   | galactose-3-O-sulfotransferase 2                                                     |
| 1,065108203 | 0,62258 | 1,120389214 | 0,0163  | GALM      | galactose mutarotase (aldose 1-epimerase)                                            |

|             |         |             |         |         |                                                                                                                            |
|-------------|---------|-------------|---------|---------|----------------------------------------------------------------------------------------------------------------------------|
| 1,085229372 | 0,42104 | 1,093535457 | 0,04175 | GALNS   | galactosamine (N-acetyl)-6-sulfate sulfatase                                                                               |
| 0,742261785 | 0,5158  | 0,856781955 | 0,03972 | GALNT1  | UDP-N-acetyl-alpha-D-galactosamine:polypeptide N-acetylgalactosaminyltransferase 1 (GalNAc-T1)                             |
| 0,907519155 | 0,64046 | 0,87539133  | 0,04075 | GALNT1  | UDP-N-acetyl-alpha-D-galactosamine:polypeptide N-acetylgalactosaminyltransferase 1 (GalNAc-T1)                             |
| 0,899378312 | 0,5847  | 1,162314108 | 0,02525 | GALNT10 | UDP-N-acetyl-alpha-D-galactosamine:polypeptide N-acetylgalactosaminyltransferase 10 (GalNAc-T10)                           |
| 1,184271612 | 0,33185 | 1,128964405 | 0,01726 | GALNT10 | UDP-N-acetyl-alpha-D-galactosamine:polypeptide N-acetylgalactosaminyltransferase 10 (GalNAc-T10)                           |
| 0,664803554 | 0,06255 | 0,616853585 | 0,00001 | GALNT12 | UDP-N-acetyl-alpha-D-galactosamine:polypeptide N-acetylgalactosaminyltransferase 12 (GalNAc-T12)                           |
| 1,028826708 | 0,81284 | 0,8962667   | 0,02164 | GALNT13 | UDP-N-acetyl-alpha-D-galactosamine:polypeptide N-acetylgalactosaminyltransferase 13 (GalNAc-T13)                           |
| 1,268391399 | 0,05371 | 1,180992661 | 0,01517 | GALNT14 | UDP-N-acetyl-alpha-D-galactosamine:polypeptide N-acetylgalactosaminyltransferase 14 (GalNAc-T14)                           |
| 0,754190038 | 0,24272 | 0,758383773 | 0,0033  | GALNT3  | UDP-N-acetyl-alpha-D-galactosamine:polypeptide N-acetylgalactosaminyltransferase 3 (GalNAc-T3)                             |
| 0,980779004 | 0,80132 | 0,867538687 | 0,00287 | GALNT3  | UDP-N-acetyl-alpha-D-galactosamine:polypeptide N-acetylgalactosaminyltransferase 3 (GalNAc-T3)                             |
| 1,313121125 | 0,08243 | 1,4063932   | 0,00269 | GALNT5  | UDP-N-acetyl-alpha-D-galactosamine:polypeptide N-acetylgalactosaminyltransferase 5 (GalNAc-T5)                             |
| 1,235418637 | 0,07255 | 1,139973273 | 0,0454  | GALNT5  | UDP-N-acetyl-alpha-D-galactosamine:polypeptide N-acetylgalactosaminyltransferase 5 (GalNAc-T5)                             |
| 0,660669203 | 0,09061 | 0,674551267 | 0,00025 | GALNT7  | UDP-N-acetyl-alpha-D-galactosamine:polypeptide N-acetylgalactosaminyltransferase 7 (GalNAc-T7)                             |
| 0,686818117 | 0,30772 | 0,69399636  | 0,00647 | GALNT7  | UDP-N-acetyl-alpha-D-galactosamine:polypeptide N-acetylgalactosaminyltransferase 7 (GalNAc-T7)                             |
| 0,973329374 | 0,76623 | 1,117287138 | 0,04288 | GALNTL1 | UDP-N-acetyl-alpha-D-galactosamine:polypeptide N-acetylgalactosaminyltransferase-like 1                                    |
| 1,021012126 | 0,83371 | 1,189207115 | 0,00384 | GALR2   | galanin receptor 2                                                                                                         |
| 1,065108203 | 0,54681 | 1,286097483 | 0,00019 | GALT    | galactose-1-phosphate uridylyltransferase                                                                                  |
| 0,992404375 | 0,95609 | 1,241427492 | 0,00065 | GALT    | galactose-1-phosphate uridylyltransferase                                                                                  |
| 1,112650121 | 0,42329 | 1,396678532 | 0,00021 | GAMT    | guanidinoacetate N-methyltransferase                                                                                       |
| 0,887611337 | 0,53736 | 0,744322628 | 0,00001 | GAN     | gigaxonin                                                                                                                  |
| 1,305859787 | 0,51921 | 1,492778383 | 0       | GANAB   | glucosidase, alpha; neutral AB                                                                                             |
| 1,128964405 | 0,57332 | 1,365093718 | 0,00001 | GANAB   | glucosidase, alpha; neutral AB                                                                                             |
| 1,118837101 | 0,34007 | 0,866336856 | 0,01367 | GANC    | glucosidase, alpha; neutral C                                                                                              |
| 1,024556823 | 0,80952 | 1,119612889 | 0,00743 | GAPDHS  | glyceraldehyde-3-phosphate dehydrogenase, spermatogenic                                                                    |
| 0,775930854 | 0,12649 | 0,90000193  | 0,04972 | GAPVD1  | GTPase activating protein and VPS9 domains 1                                                                               |
| 1,026689546 | 0,92606 | 0,76684133  | 0,0072  | GART    | phosphoribosylglycinamide formyltransferase, phosphoribosylglycinamide synthetase, phosphoribosylaminoimidazole synthetase |
| 1,088242442 | 0,36174 | 0,903752727 | 0,03584 | GART    | phosphoribosylglycinamide formyltransferase, phosphoribosylglycinamide synthetase, phosphoribosylaminoimidazole synthetase |
| 0,807760778 | 0,10321 | 0,729004689 | 0,00244 | GART    | phosphoribosylglycinamide formyltransferase, phosphoribosylglycinamide synthetase, phosphoribosylaminoimidazole synthetase |
| 1,207480591 | 0,09538 | 1,227735684 | 0,00213 | GAS2L2  | growth arrest-specific 2 like 2                                                                                            |
| 0,692554734 | 0,09576 | 0,727994774 | 0,00011 | GAS5    | growth arrest-specific 5 (non-protein coding)                                                                              |
| 1,465100875 | 0,0882  | 1,471206746 | 0,00032 | GAS6    | growth arrest-specific 6                                                                                                   |
| 1,541142217 | 0,14152 | 1,745935182 | 0,00004 | GAS6    | growth arrest-specific 6                                                                                                   |
| 0,860352631 | 0,09226 | 0,720964436 | 0,00034 | GAS7    | growth arrest-specific 7                                                                                                   |
| 1,057018041 | 0,49798 | 1,093535457 | 0,02672 | GATA1   | GATA binding protein 1 (globin transcription factor 1)                                                                     |
| 1,224336392 | 0,06299 | 1,175276328 | 0,00608 | GATA2   | GATA binding protein 2                                                                                                     |
| 1,243363632 | 0,13001 | 1,273677475 | 0,00125 | GATA2   | GATA binding protein 2                                                                                                     |
| 1,185914499 | 0,08763 | 1,260503392 | 0,00211 | GATA2   | GATA binding protein 2                                                                                                     |
| 0,885153765 | 0,30806 | 1,105730653 | 0,03169 | GATA5   | GATA binding protein 5                                                                                                     |
| 1,314031627 | 0,11416 | 1,104964485 | 0,03565 | GATA6   | GATA binding protein 6                                                                                                     |
| 0,67877249  | 0,26083 | 0,810003474 | 0,01004 | GATAD1  | GATA zinc finger domain containing 1                                                                                       |
| 0,749499801 | 0,433   | 0,746389192 | 0,00013 | GATAD1  | GATA zinc finger domain containing 1                                                                                       |
| 1,20664392  | 0,07146 | 1,17609125  | 0,0319  | GATAD2A | GATA zinc finger domain containing 2A                                                                                      |
| 0,637722196 | 0,05581 | 0,654742712 | 0,00003 | GATM    | glycine amidinotransferase (L-arginine:glycine amidinotransferase)                                                         |
| 1,198309021 | 0,11047 | 1,110338834 | 0,04205 | GATM    | glycine amidinotransferase (L-arginine:glycine amidinotransferase)                                                         |
| 1,04608494  | 0,59584 | 1,190031696 | 0,01895 | GATS    | GATS, stromal antigen 3 opposite strand                                                                                    |
| 0,77271055  | 0,16613 | 0,786762445 | 0,02445 | GBAS    | glioblastoma amplified sequence                                                                                            |
| 0,802181166 | 0,34255 | 0,742261785 | 0,00024 | GBE1    | glucan (1,4-alpha-), branching enzyme 1                                                                                    |
| 0,942131274 | 0,8197  | 1,29056249  | 0,02061 | GBF1    | golgi brefeldin A resistant guanine nucleotide exchange factor 1                                                           |
| 1,089752112 | 0,66643 | 0,681601304 | 0,00701 | GBP1    | guanylate binding protein 1, interferon-inducible                                                                          |
| 1,035982764 | 0,86897 | 0,700763725 | 0,01971 | GBP1    | guanylate binding protein 1, interferon-inducible                                                                          |
| 0,588045625 | 0,05002 | 0,827596816 | 0,00424 | GCC1    | GRIP and coiled-coil domain containing 1                                                                                   |
| 1,100378609 | 0,48752 | 1,163926534 | 0,01896 | GCC1    | GRIP and coiled-coil domain containing 1                                                                                   |
| 0,819036698 | 0,24038 | 0,828744904 | 0,02017 | GCFC1   | GC-rich sequence DNA-binding factor 1                                                                                      |
| 0,971307496 | 0,72022 | 1,262252032 | 0,00055 | GCCR    | glucagon receptor                                                                                                          |
| 0,948684315 | 0,83916 | 0,709070018 | 0,001   | GCH1    | GTP cyclohydrolase 1                                                                                                       |
| 1,143138335 | 0,18164 | 1,118061851 | 0,02986 | GCK     | glucokinase (hexokinase 4)                                                                                                 |
| 1,227735684 | 0,06363 | 1,256142381 | 0,00896 | GCKR    | glucokinase (hexokinase 4) regulator                                                                                       |
| 0,878430468 | 0,18415 | 0,866937564 | 0,02706 | GCNT7   | glucosaminyl (N-acetyl) transferase family member 7                                                                        |
| 0,855595026 | 0,42627 | 0,718470088 | 0,00463 | GCOM1   | GRINL1A complex locus                                                                                                      |
| 0,853817714 | 0,26247 | 0,732042848 | 0,00039 | GCSH    | glycine cleavage system protein H (aminomethyl carrier)                                                                    |
| 0,871154192 | 0,28375 | 0,726986259 | 0,00004 | GCSH    | glycine cleavage system protein H (aminomethyl carrier)                                                                    |
| 0,832775771 | 0,45623 | 0,668500248 | 0,00076 | GDAP1   | ganglioside-induced differentiation-associated protein 1                                                                   |
| 0,927873476 | 0,39085 | 0,767373048 | 0,0007  | GDAP1   | ganglioside-induced differentiation-associated protein 1                                                                   |
| 1,277213759 | 0,42754 | 0,775393206 | 0,02647 | GDAP2   | ganglioside induced differentiation associated protein 2                                                                   |
| 1,031683179 | 0,70163 | 0,853226098 | 0,01359 | GDAP2   | ganglioside induced differentiation associated protein 2                                                                   |
| 1,060687741 | 0,61013 | 1,153485605 | 0,04804 | GDF11   | growth differentiation factor 11                                                                                           |
| 1,065108203 | 0,60891 | 1,202469249 | 0,00269 | GDF11   | growth differentiation factor 11                                                                                           |
| 1,046810282 | 0,54608 | 1,139973273 | 0,01133 | GDF3    | growth differentiation factor 3                                                                                            |
| 1,021012126 | 0,85025 | 1,231998073 | 0,00239 | GDF9    | growth differentiation factor 9                                                                                            |
| 1,117287138 | 0,27468 | 1,153485605 | 0,03221 | GDNF    | glial cell derived neurotrophic factor                                                                                     |
| 1,0132569   | 0,88695 | 1,122721422 | 0,0118  | GDPD1   | glycerophosphodiester phosphodiesterase domain containing 1                                                                |
| 1,121943481 | 0,1669  | 1,163120042 | 0,02264 | GDPD5   | glycerophosphodiester phosphodiesterase domain containing 5                                                                |
| 1,102669163 | 0,24602 | 1,202469249 | 0,00647 | GDPD5   | glycerophosphodiester phosphodiesterase domain containing 5                                                                |
| 1,267512522 | 0,34775 | 0,798851916 | 0,02063 | GEMIN2  | gem (nuclear organelle) associated protein 2                                                                               |
| 1,020304659 | 0,85315 | 0,864537231 | 0,0299  | GEMIN2  | gem (nuclear organelle) associated protein 2                                                                               |
| 0,886381699 | 0,28371 | 0,864537231 | 0,01808 | GEMIN8  | gem (nuclear organelle) associated protein 8                                                                               |
| 1,162314108 | 0,36873 | 1,167967395 | 0,02525 | GFER    | growth factor, augmentor of liver regeneration                                                                             |
| 1,068805991 | 0,76884 | 0,872967591 | 0,03185 | GFM1    | G elongation factor, mitochondrial 1                                                                                       |
| 0,920187651 | 0,70022 | 0,77271055  | 0,00434 | GFM1    | G elongation factor, mitochondrial 1                                                                                       |
| 0,829894586 | 0,28857 | 0,775393206 | 0,0084  | GFM1    | G elongation factor, mitochondrial 1                                                                                       |
| 1,300440147 | 0,12281 | 0,862143545 | 0,0134  | GFOD1   | glucose-fructose oxidoreductase domain containing 1                                                                        |
| 1,114966219 | 0,27106 | 1,17609125  | 0,00837 | GFRA2   | GDNF family receptor alpha 2                                                                                               |
| 1,099616149 | 0,3762  | 1,155085785 | 0,0211  | GFRA4   | GDNF family receptor alpha 4                                                                                               |
| 1,043188594 | 0,71109 | 1,159095952 | 0,03757 | GGA2    | golgi-associated, gamma adaptin ear containing, ARF binding protein 2                                                      |
| 1,066585781 | 0,68767 | 1,171210181 | 0,01316 | GGA2    | golgi-associated, gamma adaptin ear containing, ARF binding protein 2                                                      |
| 1,086734863 | 0,39412 | 1,245737416 | 0,00033 | GGA2    | golgi-associated, gamma adaptin ear containing, ARF binding protein 2                                                      |
| 0,965936329 | 0,69902 | 1,215879283 | 0,0013  | GGA2    | golgi-associated, gamma adaptin ear containing, ARF binding protein 2                                                      |
| 1,301341855 | 0,06907 | 1,29056249  | 0,00957 | GGCX    | gamma-glutamyl carboxylase                                                                                                 |
| 1,181811547 | 0,27433 | 0,877213549 | 0,01336 | GGCX    | gamma-glutamyl carboxylase                                                                                                 |
| 0,767373048 | 0,28287 | 0,84323111  | 0,003   | GGNBP2  | gametogenetin binding protein 2                                                                                            |
| 0,741233505 | 0,29762 | 0,724471077 | 0,00348 | GGNBP2  | gametogenetin binding protein 2                                                                                            |
| 0,813943185 | 0,42367 | 0,821310701 | 0,0226  | GGPS1   | geranylgeranyl diphosphate synthase 1                                                                                      |
| 1,190031696 | 0,19467 | 1,488645255 | 0,00018 | GGT1    | gamma-glutamyltransferase 1                                                                                                |
| 1,088997015 | 0,51373 | 1,278985581 | 0,00054 | GGT1    | gamma-glutamyltransferase 1                                                                                                |
| 1,138394029 | 0,40687 | 1,4054187   | 0,00125 | GGT1    | gamma-glutamyltransferase 1                                                                                                |
| 1,126619228 | 0,45598 | 1,380317353 | 0,00043 | GGT1    | gamma-glutamyltransferase 1                                                                                                |
| 1,048989328 | 0,62462 | 1,247465572 | 0,00093 | GGT7    | gamma-glutamyltransferase 7                                                                                                |
| 1,108800644 | 0,35671 | 1,176906737 | 0,00691 | GGT7    | gamma-glutamyltransferase 7                                                                                                |
| 1,048989328 | 0,61646 | 1,092777739 | 0,03428 | GGT7    | gamma-glutamyltransferase 7                                                                                                |
| 0,765248385 | 0,20905 | 0,793333843 | 0,00472 | GGTA1P  | glycoprotein, alpha-galactosyltransferase 1 pseudogene                                                                     |
| 1,048989328 | 0,72082 | 1,379360922 | 0,00046 | GGTLC1  | gamma-glutamyltransferase light chain 1                                                                                    |
| 0,976708529 | 0,74236 | 1,172022284 | 0,00756 | GH1     | growth hormone 1                                                                                                           |
| 1,136029265 | 0,20192 | 1,101905116 | 0,0231  | GH1     | growth hormone 1                                                                                                           |
| 1,374588696 | 0,09359 | 1,304050735 | 0,01584 | GHDC    | GH3 domain containing                                                                                                      |



|              |         |             |         |          |                                                                                                       |
|--------------|---------|-------------|---------|----------|-------------------------------------------------------------------------------------------------------|
| 0,717474767  | 0,243   | 0,68491649  | 0,00117 | GHR      | growth hormone receptor                                                                               |
| 1,030968319  | 0,72861 | 1,117287138 | 0,00437 | GHRHR    | growth hormone releasing hormone receptor                                                             |
| 1,046810282  | 0,56244 | 1,236275261 | 0,00082 | GHRHR    | growth hormone releasing hormone receptor                                                             |
| 1,044635763  | 0,70312 | 1,188383105 | 0,00412 | GHRHR    | growth hormone releasing hormone receptor                                                             |
| 1,17609125   | 0,09009 | 1,191682575 | 0,03757 | GHRL     | ghrelin/obestatin prepropeptide                                                                       |
| 1,160703914  | 0,13473 | 1,113421618 | 0,03589 | GHSR     | growth hormone secretagogue receptor                                                                  |
| 1,048262476  | 0,43449 | 1,114193651 | 0,01647 | GHSR     | growth hormone secretagogue receptor                                                                  |
| 1,083725967  | 0,48533 | 1,181811547 | 0,00866 | GIMAP1   | GTPase, IMAP family member 1                                                                          |
| 1,309485423  | 0,09276 | 1,519924856 | 0,00314 | GIMAP8   | GTPase, IMAP family member 8                                                                          |
| 0,713507253  | 0,07359 | 0,736113431 | 0,00048 | GINS3    | GINS complex subunit 3 (Psf3 homolog)                                                                 |
| 0,805524291  | 0,36201 | 0,784584098 | 0,01216 | GIPC2    | GIPC PDZ domain containing family, member 2                                                           |
| 1,036701101  | 0,86256 | 0,821880187 | 0,01314 | GIPC2    | GIPC PDZ domain containing family, member 2                                                           |
| 1,083725967  | 0,45722 | 1,221793102 | 0,0142  | GIT2     | G protein-coupled receptor kinase interacting ArfGAP 2                                                |
| 1,284315809  | 0,05595 | 1,180174343 | 0,00839 | GIT2     | G protein-coupled receptor kinase interacting ArfGAP 2                                                |
| 0,564873607  | 0,05478 | 0,846158597 | 0,0393  | GJB3     | gap junction protein, beta 3, 31kDa                                                                   |
| 0,622868708  | 0,12421 | 0,85797053  | 0,04084 | GJB3     | gap junction protein, beta 3, 31kDa                                                                   |
| 1,282536603  | 0,06967 | 1,320422841 | 0,00006 | GJB4     | gap junction protein, beta 4, 30.3kDa                                                                 |
| 1,018891197  | 0,85361 | 1,248330549 | 0,00095 | GJD2     | gap junction protein, delta 2, 36kDa                                                                  |
| 0,925304428  | 0,51893 | 1,101141598 | 0,03142 | GJD3     | gap junction protein, delta 3, 31.9kDa                                                                |
| 0,992404375  | 0,94493 | 0,752101876 | 0,03837 | GK       | glycerol kinase                                                                                       |
| 0,87539133   | 0,40286 | 0,730522189 | 0,0045  | GK       | glycerol kinase                                                                                       |
| 0,997231251  | 0,98936 | 0,796088099 | 0,01029 | GK5      | glycerol kinase 5 (putative)                                                                          |
| 1,175276328  | 0,09885 | 1,151089491 | 0,00678 | GKN1     | gastrokin 1                                                                                           |
| 1,074749173  | 0,46525 | 1,190031696 | 0,00362 | GKN2     | gastrokin 2                                                                                           |
| 0,945402117  | 0,5482  | 1,167158102 | 0,04114 | GLB1L2   | galactosidase, beta 1-like 2                                                                          |
| 1,055553718  | 0,53879 | 1,115739322 | 0,04339 | GLB1L3   | galactosidase, beta 1-like 3                                                                          |
| 1,400556321  | 0,08668 | 1,441928871 | 0,00118 | GLCC11   | glucocorticoid induced transcript 1                                                                   |
| 0,63860688   | 0,13355 | 0,734075318 | 0,00265 | GLCE     | glucuronic acid epimerase                                                                             |
| 1,048262476  | 0,76497 | 1,281647924 | 0,00014 | GLG1     | golgi glycoprotein 1                                                                                  |
| 0,891310496  | 0,73394 | 1,180992661 | 0,00279 | GLG1     | golgi glycoprotein 1                                                                                  |
| 1,056285625  | 0,65159 | 1,181811547 | 0,03849 | GLG1     | golgi glycoprotein 1                                                                                  |
| 1,345367209  | 0,06569 | 1,398616083 | 0,00129 | GLIPR2   | GLI pathogenesis-related 2                                                                            |
| 1,04608494   | 0,66535 | 1,212512819 | 0,01475 | GLP1R    | glucagon-like peptide 1 receptor                                                                      |
| 1,209155676  | 0,11014 | 1,193355743 | 0,00652 | GLP1R    | glucagon-like peptide 1 receptor                                                                      |
| 1,098854218  | 0,43302 | 1,156688184 | 0,04134 | GLRA2    | glycine receptor, alpha 2                                                                             |
| 1,263127262  | 0,19925 | 1,431968741 | 0,00038 | GLRX     | glutaredoxin (thioltransferase)                                                                       |
| 1,25353302   | 0,45517 | 1,402499251 | 0,00254 | GLRX     | glutaredoxin (thioltransferase)                                                                       |
| 0,884540435  | 0,19098 | 0,771105413 | 0,00042 | GLRX2    | glutaredoxin 2                                                                                        |
| 0,982139595  | 0,81902 | 0,882091365 | 0,02099 | GLRX3    | glutaredoxin 3                                                                                        |
| 0,627635996  | 0,10198 | 0,71946679  | 0,00502 | GLRX3    | glutaredoxin 3                                                                                        |
| 0,948684315  | 0,76772 | 1,204972315 | 0,00095 | GLS      | glutaminase                                                                                           |
| 0,977385766  | 0,87304 | 1,318593614 | 0,01956 | GLT8D2   | glycosyltransferase 8 domain containing 2                                                             |
| 1,412254404  | 0,12375 | 1,321338406 | 0,04339 | GLT8D2   | glycosyltransferase 8 domain containing 2                                                             |
| 0,895025071  | 0,1822  | 0,874784765 | 0,03492 | GLTSCR2  | glioma tumor suppressor candidate region gene 2                                                       |
| 1,440929749  | 0,06111 | 1,370782805 | 0,03107 | GLUL     | glutamate-ammonia ligase                                                                              |
| 1,190031696  | 0,07898 | 1,10343374  | 0,02931 | GLYAT    | glycine-N-acyltransferase                                                                             |
| 1,125838586  | 0,20961 | 1,183451022 | 0,00814 | GLYAT    | glycine-N-acyltransferase                                                                             |
| 1,111108729  | 0,34786 | 1,22858698  | 0,00423 | GLYCK    | glycerate kinase                                                                                      |
| 1,085229372  | 0,34847 | 1,114966219 | 0,04458 | GLYCK    | glycerate kinase                                                                                      |
| 0,76418826   | 0,12529 | 0,738157203 | 0,00033 | GM2A     | GM2 ganglioside activator                                                                             |
| 0,901250463  | 0,59256 | 0,830470024 | 0,00809 | GMCL1    | germ cell-less homolog 1 (Drosophila)                                                                 |
| 1,585568273  | 0,10033 | 1,361314116 | 0,00436 | GMDS     | GDP-mannose 4,6-dehydratase                                                                           |
| 1,286989247  | 0,07617 | 1,230291345 | 0,0105  | GMDS     | GDP-mannose 4,6-dehydratase                                                                           |
| 0,843815796  | 0,22135 | 0,866336856 | 0,02215 | GMEB1    | glucocorticoid modulatory element binding protein 1                                                   |
| 0,964598185  | 0,77857 | 0,880259014 | 0,03508 | GMFB     | glia maturation factor, beta                                                                          |
| 1,191682575  | 0,27022 | 1,223488041 | 0,03982 | GMIP     | GEM interacting protein                                                                               |
| 0,853817714  | 0,44589 | 0,791137301 | 0,00256 | GMNN     | geminin, DNA replication inhibitor                                                                    |
| 1,086734863  | 0,62646 | 1,241427492 | 0,00834 | GMPPA    | GDP-mannose pyrophosphorylase A                                                                       |
| 1,098092814  | 0,59609 | 1,202469249 | 0,00058 | GMPPB    | GDP-mannose pyrophosphorylase B                                                                       |
| 0,922103118  | 0,64667 | 1,147107024 | 0,00481 | GMPPR2   | guanosine monophosphate reductase 2                                                                   |
| 0,939522749  | 0,52804 | 0,823020345 | 0,0033  | GNA11    | guanine nucleotide binding protein (G protein), alpha 11 (Gq class)                                   |
| 1,216722359  | 0,10044 | 1,132098902 | 0,00904 | GNA12    | guanine nucleotide binding protein (G protein) alpha 12                                               |
| 0,903752727  | 0,47965 | 0,882091365 | 0,04727 | GNA13    | guanine nucleotide binding protein (G protein), alpha 13                                              |
| 0,946713631  | 0,83532 | 0,7944344   | 0,00107 | GNA13    | guanine nucleotide binding protein (G protein), alpha 13                                              |
| 0,6721217497 | 0,08339 | 0,651122095 | 0,00061 | GNA13    | guanine nucleotide binding protein (G protein), alpha inhibiting activity polypeptide 1               |
| 0,600401714  | 0,05661 | 0,696888619 | 0,00135 | GNA11    | guanine nucleotide binding protein (G protein), alpha inhibiting activity polypeptide 1               |
| 1,175276328  | 0,45483 | 1,394743666 | 0,00901 | GNA12    | guanine nucleotide binding protein (G protein), alpha inhibiting activity polypeptide 2               |
| 0,76154437   | 0,17738 | 0,71449707  | 0,00027 | GNA13    | guanine nucleotide binding protein (G protein), alpha inhibiting activity polypeptide 3               |
| 0,967947027  | 0,82704 | 0,765778999 | 0,00137 | GNAL     | guanine nucleotide binding protein (G protein), alpha activating activity polypeptide, olfactory type |
| 1,025978145  | 0,79627 | 0,879649076 | 0,0212  | GNAL     | guanine nucleotide binding protein (G protein), alpha activating activity polypeptide, olfactory type |
| 0,847919965  | 0,54333 | 0,609627547 | 0,00012 | GNAL     | guanine nucleotide binding protein (G protein), alpha activating activity polypeptide, olfactory type |
| 1,17609125   | 0,1287  | 1,185092771 | 0,01162 | GNAO1    | guanine nucleotide binding protein (G protein), alpha activating activity polypeptide O               |
| 0,820741609  | 0,35866 | 0,815072332 | 0,00216 | GNAQ     | guanine nucleotide binding protein (G protein), q polypeptide                                         |
| 0,787307977  | 0,29676 | 0,824733549 | 0,01141 | GNAQ     | guanine nucleotide binding protein (G protein), q polypeptide                                         |
| 0,856188285  | 0,41316 | 0,777546036 | 0,01094 | GNAS     | GNAS complex locus                                                                                    |
| 0,997231251  | 0,97656 | 1,167158102 | 0,0031  | GNA11    | guanine nucleotide binding protein (G protein), alpha transducing activity polypeptide 1              |
| 1,011152081  | 0,97342 | 0,904379378 | 0,04857 | GNB1     | guanine nucleotide binding protein (G protein), beta polypeptide 1                                    |
| 1,086734863  | 0,38645 | 1,212512819 | 0,00294 | GNB3     | guanine nucleotide binding protein (G protein), beta polypeptide 3                                    |
| 0,780786493  | 0,07865 | 0,803850991 | 0,00718 | GNB4     | guanine nucleotide binding protein (G protein), beta polypeptide 4                                    |
| 0,864537231  | 0,47539 | 0,833353207 | 0,0085  | GNB4     | guanine nucleotide binding protein (G protein), beta polypeptide 4                                    |
| 1,077733145  | 0,44648 | 1,112650121 | 0,01964 | GNB5     | guanine nucleotide binding protein (G protein), beta 5                                                |
| 1,128182137  | 0,1948  | 1,255271991 | 0,00652 | GNG7     | guanine nucleotide binding protein (G protein), gamma 7                                               |
| 1,175276328  | 0,12837 | 1,189207115 | 0,00738 | GNG7     | guanine nucleotide binding protein (G protein), gamma 7                                               |
| 0,825877665  | 0,19582 | 0,744322628 | 0,00385 | GNL1     | guanine nucleotide binding protein-like 1                                                             |
| 0,886381699  | 0,58864 | 0,802737389 | 0,00399 | GNL3L    | guanine nucleotide binding protein-like 3 (nucleolar)-like                                            |
| 1,16877249   | 0,05239 | 1,145517898 | 0,01792 | GNN      | Grp94 neighboring nucleotidase pseudogene                                                             |
| 0,851453708  | 0,21127 | 0,903752727 | 0,03486 | GNPAT    | glyceronephosphate O-acyltransferase                                                                  |
| 0,8362464    | 0,32183 | 0,740206649 | 0,00325 | GNPDA2   | glucosamine-6-phosphate deaminase 2                                                                   |
| 1,011853201  | 0,94108 | 0,873267076 | 0,00369 | GNPNAT1  | glucosamine-phosphate N-acetyltransferase 1                                                           |
| 1,137605228  | 0,14507 | 1,085229372 | 0,04877 | GNPTAB   | N-acetylglucosamine-1-phosphate transferase, alpha and beta subunits                                  |
| 0,713507253  | 0,09717 | 0,713507253 | 0,00067 | GNRH1    | gonadotropin-releasing hormone 1 (luteinizing-releasing hormone)                                      |
| 0,944747041  | 0,70864 | 0,743806881 | 0,00087 | GOLGA2   | golgin A2                                                                                             |
| 0,747942879  | 0,14045 | 0,662044455 | 0,0001  | GOLGA2   | golgin A2                                                                                             |
| 1,038859103  | 0,74423 | 0,886996305 | 0,00875 | GOLGA3   | golgin A3                                                                                             |
| 1,079228237  | 0,28489 | 1,111879158 | 0,01609 | GOLGA6L2 | golgin A6 family-like 2                                                                               |
| 0,893785162  | 0,45472 | 0,832775771 | 0,00104 | GOLGA7   | golgin A7                                                                                             |
| 0,888226796  | 0,30584 | 0,883927531 | 0,03853 | GOLGA7B  | golgin A7 family, member B                                                                            |
| 0,801069878  | 0,14394 | 0,786217292 | 0,00971 | GOLGA8A  | golgin A8 family, member A                                                                            |
| 0,741233505  | 0,10786 | 0,86934456  | 0,03517 | GOLGA8A  | golgin A8 family, member A                                                                            |
| 1,21335356   | 0,10921 | 1,185092771 | 0,01351 | GOLIM4   | golgi integral membrane protein 4                                                                     |
| 0,895025071  | 0,37456 | 0,8962667   | 0,02475 | GON4L    | gon-4-like (C. elegans)                                                                               |
| 0,931740429  | 0,69752 | 0,847919965 | 0,01294 | GOPC     | golgi-associated PDZ and coiled-coil motif containing                                                 |
| 0,863938187  | 0,46175 | 0,751580739 | 0,01288 | GOPC     | golgi-associated PDZ and coiled-coil motif containing                                                 |
| 0,923382311  | 0,53534 | 0,812252396 | 0,00065 | GOSR1    | golgi SNAP receptor complex member 1                                                                  |

|             |         |             |         |         |                                                                                  |
|-------------|---------|-------------|---------|---------|----------------------------------------------------------------------------------|
| 1,184271612 | 0,13137 | 1,221793102 | 0,02978 | GOSR2   | golgi SNAP receptor complex member 2                                             |
| 1,086734863 | 0,32476 | 1,194163187 | 0,01211 | GOSR2   | golgi SNAP receptor complex member 2                                             |
| 1,194163187 | 0,12204 | 1,138394029 | 0,00588 | GPA33   | glycoprotein A33 (transmembrane)                                                 |
| 0,95929261  | 0,81798 | 1,190031696 | 0,01512 | GPA11   | glycosylphosphatidylinositol anchor attachment protein 1 homolog (yeast)         |
| 0,883315051 | 0,60046 | 0,732042848 | 0,00148 | GPAM    | glycerol-3-phosphate acyltransferase, mitochondrial                              |
| 1,229438867 | 0,08071 | 1,167158102 | 0,03689 | GPAT2   | glycerol-3-phosphate acyltransferase 2, mitochondrial                            |
| 0,968618189 | 0,8768  | 0,739693755 | 0,00128 | GPATCH2 | G patch domain containing 2                                                      |
| 1,018891197 | 0,92341 | 0,827596816 | 0,00989 | GPATCH2 | G patch domain containing 2                                                      |
| 1,125058485 | 0,13287 | 1,16634937  | 0,00569 | GPATCH4 | G patch domain containing 4                                                      |
| 0,692074858 | 0,0608  | 0,799960128 | 0,00118 | GPATCH4 | G patch domain containing 4                                                      |
| 0,832775771 | 0,18936 | 0,86934456  | 0,00454 | GPATCH8 | G patch domain containing 8                                                      |
| 0,712025098 | 0,06271 | 0,806082831 | 0,00012 | GPBP1   | GC-rich promoter binding protein 1                                               |
| 0,756283999 | 0,13697 | 0,852044095 | 0,02352 | GPBP1   | GC-rich promoter binding protein 1                                               |
| 0,788946841 | 0,47434 | 0,788946841 | 0,00684 | GPBP1L1 | GC-rich promoter binding protein 1-like 1                                        |
| 1,240567298 | 0,05121 | 1,360370852 | 0,00007 | GPC4    | glypican 4                                                                       |
| 1,172834949 | 0,10699 | 1,193335743 | 0,02946 | GPC4    | glypican 4                                                                       |
| 1,231998073 | 0,05495 | 1,118061851 | 0,04838 | GPC6    | glypican 6                                                                       |
| 0,977385766 | 0,82509 | 1,119612889 | 0,03165 | GPD1    | glycerol-3-phosphate dehydrogenase 1 (soluble)                                   |
| 1,172022284 | 0,18374 | 1,159899655 | 0,00699 | GPHB5   | glycoprotein hormone beta 5                                                      |
| 0,844986384 | 0,22337 | 0,835666959 | 0,03091 | GPHN    | gephyrin                                                                         |
| 0,803293997 | 0,13159 | 0,787307977 | 0,00024 | GPHN    | gephyrin                                                                         |
| 1,050444544 | 0,52426 | 1,190856849 | 0,04953 | GPIHBP1 | glycosylphosphatidylinositol anchored high density lipoprotein binding protein 1 |
| 1,144724161 | 0,1644  | 1,169587664 | 0,02642 | GPM6A   | glycoprotein M6A                                                                 |
| 0,95929261  | 0,79734 | 0,820741609 | 0,00374 | GNP3    | GPN-loop GTPase 3                                                                |
| 0,773782497 | 0,29481 | 0,753667455 | 0,01389 | GNPMB   | glycoprotein (transmembrane) nmb                                                 |
| 1,203303026 | 0,17067 | 1,165541198 | 0,01257 | GPR101  | G protein-coupled receptor 101                                                   |
| 1,133669413 | 0,53859 | 1,227735684 | 0,00064 | GPR108  | G protein-coupled receptor 108                                                   |
| 1,185914499 | 0,11098 | 1,338855257 | 0,00097 | GPR110  | G protein-coupled receptor 110                                                   |
| 1,224336392 | 0,27173 | 1,481439798 | 0,00024 | GPR116  | G protein-coupled receptor 116                                                   |
| 1,304050735 | 0,22679 | 1,364147835 | 0,003   | GPR124  | G protein-coupled receptor 124                                                   |
| 1,164733586 | 0,11107 | 1,215879283 | 0,01504 | GPR124  | G protein-coupled receptor 124                                                   |
| 0,828744904 | 0,31522 | 0,762600827 | 0,00726 | GPR125  | G protein-coupled receptor 125                                                   |
| 0,651573575 | 0,18078 | 0,721464343 | 0,00069 | GPR126  | G protein-coupled receptor 126                                                   |
| 1,081474763 | 0,49586 | 1,242288282 | 0,00934 | GPR135  | G protein-coupled receptor 135                                                   |
| 1,062159186 | 0,58771 | 1,184271612 | 0,02401 | GPR153  | G protein-coupled receptor 153                                                   |
| 0,735603373 | 0,20019 | 0,719965659 | 0,0026  | GPR155  | G protein-coupled receptor 155                                                   |
| 0,962594443 | 0,82657 | 0,792784137 | 0,03861 | GPR155  | G protein-coupled receptor 155                                                   |
| 1,289668251 | 0,21194 | 1,196648963 | 0,02215 | GPR157  | G protein-coupled receptor 157                                                   |
| 0,772175133 | 0,08271 | 0,825877665 | 0,00949 | GPR161  | G protein-coupled receptor 161                                                   |
| 1,128964405 | 0,29607 | 1,131314463 | 0,01357 | GPR162  | G protein-coupled receptor 162                                                   |
| 1,07549439  | 0,79268 | 1,28877463  | 0,02268 | GPR172A | G protein-coupled receptor 172A                                                  |
| 1,157490217 | 0,27886 | 1,196648963 | 0,02293 | GPR176  | G protein-coupled receptor 176                                                   |
| 0,963929808 | 0,84671 | 0,830470024 | 0,01558 | GPR180  | G protein-coupled receptor 180                                                   |
| 1,163120042 | 0,05428 | 1,238848698 | 0,00294 | GPR19   | G protein-coupled receptor 19                                                    |
| 0,775393206 | 0,33889 | 0,71548826  | 0,01911 | GPR27   | G protein-coupled receptor 27                                                    |
| 1,154285418 | 0,12416 | 1,237132479 | 0,00119 | GPR31   | G protein-coupled receptor 31                                                    |
| 1,10343374  | 0,27233 | 1,151887642 | 0,00776 | GPR35   | G protein-coupled receptor 35                                                    |
| 0,66296288  | 0,07863 | 0,728499557 | 0,01328 | GPR37   | G protein-coupled receptor 37 (endothelin receptor type B-like)                  |
| 1,135242102 | 0,28995 | 1,199139914 | 0,03126 | GPR4    | G protein-coupled receptor 4                                                     |
| 1,030253954 | 0,7588  | 1,170398641 | 0,00454 | GPR50   | G protein-coupled receptor 50                                                    |
| 1,132883885 | 0,10235 | 1,155085785 | 0,04861 | GPR52   | G protein-coupled receptor 52                                                    |
| 1,121943481 | 0,29292 | 1,180992661 | 0,01517 | GPR6    | G protein-coupled receptor 6                                                     |
| 1,114193651 | 0,30157 | 1,168777249 | 0,03512 | GPR62   | G protein-coupled receptor 62                                                    |
| 1,337927555 | 0,07739 | 1,106497353 | 0,01069 | GPR85   | G protein-coupled receptor 85                                                    |
| 0,771640088 | 0,14024 | 0,927230546 | 0,04675 | GPR89A  | G protein-coupled receptor 89A                                                   |
| 1,183451022 | 0,09533 | 1,329607108 | 0,00068 | GPR97   | G protein-coupled receptor 97                                                    |
| 1,210833084 | 0,42151 | 1,380317353 | 0,01223 | GPRCSA  | G protein-coupled receptor, family C, group 5, member A                          |
| 1,190856849 | 0,13825 | 1,245737416 | 0,00247 | GPRCSB  | G protein-coupled receptor, family C, group 5, member B                          |
| 1,070288698 | 0,48781 | 1,341642225 | 0,00004 | GPRCSC  | G protein-coupled receptor, family C, group 5, member C                          |
| 1,25962998  | 0,06431 | 1,159899655 | 0,02867 | GPRCSD  | G protein-coupled receptor, family C, group 5, member D                          |
| 0,897510051 | 0,36741 | 0,87175824  | 0,03759 | GPSM1   | G-protein signaling modulator 1                                                  |
| 0,80408371  | 0,12865 | 0,85086373  | 0,04056 | GPT2    | glutamic pyruvate transaminase (alanine aminotransferase) 2                      |
| 0,882702996 | 0,70583 | 1,208317843 | 0,0482  | GPX1    | glutathione peroxidase 1                                                         |
| 1,100378609 | 0,41146 | 1,134455485 | 0,04897 | GRAPL   | GRB2-related adaptor protein-like                                                |
| 1,105730653 | 0,331   | 1,238848698 | 0,00029 | GRASP   | GRP1 (general receptor for phosphoinositides 1)-associated scaffold protein      |
| 1,119612889 | 0,43265 | 1,152686347 | 0,04025 | GRB10   | growth factor receptor-bound protein 10                                          |
| 0,993781093 | 0,96612 | 1,155886707 | 0,01303 | GRB10   | growth factor receptor-bound protein 10                                          |
| 1,286989247 | 0,05442 | 1,167158102 | 0,03199 | GRB10   | growth factor receptor-bound protein 10                                          |
| 1,140763716 | 0,23157 | 1,132883885 | 0,0062  | GRB2    | growth factor receptor-bound protein 2                                           |
| 1,163926534 | 0,05078 | 1,114966219 | 0,01828 | GREB1L  | growth regulation by estrogen in breast cancer-like                              |
| 1,21167266  | 0,19706 | 1,311302014 | 0,00213 | GRID1   | glutamate receptor, ionotropic, delta 1                                          |
| 1,246601194 | 0,05495 | 1,342572503 | 0,00032 | GRID1   | glutamate receptor, ionotropic, delta 1                                          |
| 1,038859103 | 0,64415 | 1,151887642 | 0,02431 | GRIK3   | glutamate receptor, ionotropic, kainate 3                                        |
| 1,167158102 | 0,26269 | 1,147902414 | 0,01361 | GRIK5   | glutamate receptor, ionotropic, kainate 5                                        |
| 1,114193651 | 0,38309 | 1,150291893 | 0,04764 | GRIK5   | glutamate receptor, ionotropic, kainate 5                                        |
| 1,250062303 | 0,05162 | 1,264879542 | 0,00159 | GRIN2A  | glutamate receptor, ionotropic, N-methyl D-aspartate 2A                          |
| 1,043188594 | 0,60417 | 1,151089491 | 0,01447 | GRIN2C  | glutamate receptor, ionotropic, N-methyl D-aspartate 2C                          |
| 0,645281245 | 0,12137 | 0,722465199 | 0,00081 | GRIP1   | glutamate receptor interacting protein 1                                         |
| 1,021720083 | 0,84343 | 0,894404902 | 0,02412 | GRIPAP1 | GRIP1 associated protein 1                                                       |
| 0,985549337 | 0,81968 | 0,825877665 | 0,0179  | GRK4    | G protein-coupled receptor kinase 4                                              |
| 1,040300267 | 0,67307 | 1,135242102 | 0,03547 | GRK5    | G protein-coupled receptor kinase 5                                              |
| 1,20163605  | 0,07697 | 1,215879283 | 0,00143 | GRK5    | G protein-coupled receptor kinase 5                                              |
| 1,172022284 | 0,20879 | 1,257884972 | 0,00019 | GRK6    | G protein-coupled receptor kinase 6                                              |
| 1,040300267 | 0,78264 | 1,178539408 | 0,02532 | GRK6    | G protein-coupled receptor kinase 6                                              |
| 1,00556058  | 0,94043 | 1,124278924 | 0,01707 | GRM6    | glutamate receptor, metabotropic 6                                               |
| 1,154285418 | 0,10834 | 1,141554707 | 0,00162 | GRM7    | glutamate receptor, metabotropic 7                                               |
| 0,917004043 | 0,42485 | 0,816768991 | 0,00295 | GRPEL1  | GrpE-like 1, mitochondrial (E. coli)                                             |
| 1,102669163 | 0,42997 | 1,155085785 | 0,00581 | GRPR    | gastrin-releasing peptide receptor                                               |
| 0,820741609 | 0,32866 | 0,808881348 | 0,00117 | GRSF1   | G-rich RNA sequence binding factor 1                                             |
| 0,847919965 | 0,38257 | 0,795536484 | 0,00053 | GRSF1   | G-rich RNA sequence binding factor 1                                             |
| 1,10343374  | 0,35097 | 1,217566019 | 0,00058 | GSDMB   | gasdermin B                                                                      |
| 1,117287138 | 0,465   | 1,188383105 | 0,00604 | GSDMD   | gasdermin D                                                                      |
| 0,831622098 | 0,24216 | 0,988755127 | 0,04963 | GSPT1   | G1 to S phase transition 1                                                       |
| 0,810003474 | 0,09338 | 0,857376037 | 0,01714 | GSPT1   | G1 to S phase transition 1                                                       |
| 0,581560021 | 0,15139 | 0,671751713 | 0,0302  | GSPT1   | G1 to S phase transition 1                                                       |
| 0,986916546 | 0,93601 | 0,824162085 | 0,02724 | GSPT1   | G1 to S phase transition 1                                                       |
| 0,95929261  | 0,76278 | 0,842062954 | 0,03951 | GSTCD   | glutathione S-transferase, C-terminal domain containing                          |
| 1,022428531 | 0,8456  | 1,185092771 | 0,01052 | GSTM1   | glutathione S-transferase mu 1                                                   |
| 0,91383145  | 0,47954 | 1,184271612 | 0,00506 | GSTM1   | glutathione S-transferase mu 1                                                   |
| 0,968618189 | 0,80149 | 1,183451022 | 0,01362 | GSTM2   | glutathione S-transferase mu 2 (muscle)                                          |
| 1,0238469   | 0,84151 | 1,150291893 | 0,01495 | GSTT1   | glutathione S-transferase theta 1                                                |
| 1,029540083 | 0,76841 | 1,120389214 | 0,00386 | GSX1    | GS homeobox 1                                                                    |
| 1,104198847 | 0,40184 | 1,247465572 | 0,00222 | GSX1    | GS homeobox 1                                                                    |
| 0,999307093 | 0,99468 | 1,199139914 | 0,00352 | GTF2A1  | general transcription factor IIA, 1, 19/37kDa                                    |

|             |         |             |         |          |                                                                          |
|-------------|---------|-------------|---------|----------|--------------------------------------------------------------------------|
| 0,846158597 | 0,1644  | 0,872362706 | 0,01931 | GTF2A2   | general transcription factor IIA, 2, 12kDa                               |
| 0,778624691 | 0,09292 | 0,858565436 | 0,01726 | GTF2B    | general transcription factor IIB                                         |
| 0,698339266 | 0,13209 | 0,773782497 | 0,001   | GTF2H1   | general transcription factor IIH, polypeptide 1, 62kDa                   |
| 1           | 0,99854 | 0,827023368 | 0,01343 | GTF2H1   | general transcription factor IIH, polypeptide 1, 62kDa                   |
| 0,899378312 | 0,3397  | 0,76248385  | 0,00001 | GTF2IRD2 | GTF2I repeat domain containing 2                                         |
| 0,8962667   | 0,23419 | 0,874784765 | 0,00438 | GTF3C2   | general transcription factor IIIC, polypeptide 2, beta 110kDa            |
| 0,902500727 | 0,34345 | 0,851453708 | 0,00239 | GTF3C2   | general transcription factor IIIC, polypeptide 2, beta 110kDa            |
| 0,853226098 | 0,40819 | 0,723467443 | 0,00206 | GTF3C3   | general transcription factor IIIC, polypeptide 3, 102kDa                 |
| 1,0132569   | 0,85897 | 1,07549439  | 0,03903 | GTF3C3   | general transcription factor IIIC, polypeptide 3, 102kDa                 |
| 0,71449707  | 0,05809 | 0,825305409 | 0,03418 | GTF3C3   | general transcription factor IIIC, polypeptide 3, 102kDa                 |
| 0,822450069 | 0,31759 | 0,791685866 | 0,00056 | GTF3C3   | general transcription factor IIIC, polypeptide 3, 102kDa                 |
| 1,077733145 | 0,57844 | 1,151089491 | 0,01785 | GTPBP1   | GTP binding protein 1                                                    |
| 0,76154437  | 0,18188 | 0,727994774 | 0,00028 | GTPBP4   | GTP binding protein 4                                                    |
| 1,111879158 | 0,32189 | 1,21335356  | 0,00592 | GTPBP5   | GTP binding protein 5 (putative)                                         |
| 0,948026965 | 0,81548 | 0,821310701 | 0,03585 | GTPBP8   | GTP-binding protein 8 (putative)                                         |
| 0,827596816 | 0,12218 | 0,790589117 | 0,00486 | GTPBP8   | GTP-binding protein 8 (putative)                                         |
| 1,058484395 | 0,57603 | 1,153485605 | 0,01902 | GUCA1A   | guanylate cyclase activator 1A (retina)                                  |
| 1,096571589 | 0,40871 | 1,100378609 | 0,0439  | GUCA1B   | guanylate cyclase activator 1B (retina)                                  |
| 1,002776436 | 0,97687 | 1,138394029 | 0,00613 | GUCY1A2  | guanylate cyclase 1, soluble, alpha 2                                    |
| 1,104198847 | 0,43024 | 1,172834949 | 0,0114  | GUCY1A3  | guanylate cyclase 1, soluble, alpha 3                                    |
| 0,827023368 | 0,41035 | 0,748461493 | 0,00529 | GUCY2C   | guanylate cyclase 2C (heat stable enterotoxin receptor)                  |
| 0,523405141 | 0,11333 | 0,804966138 | 0,00802 | GUK1     | guanylate kinase 1                                                       |
| 0,923382311 | 0,83208 | 0,785128119 | 0,02013 | GULP1    | GULP, engulfment adaptor PTB domain containing 1                         |
| 0,85797053  | 0,60391 | 0,673616788 | 0,00052 | GULP1    | GULP, engulfment adaptor PTB domain containing 1                         |
| 1,215879283 | 0,21642 | 1,251796459 | 0,00224 | GUSB     | glucuronidase, beta                                                      |
| 1,095811766 | 0,25599 | 1,159095952 | 0,04285 | GUSBP11  | glucuronidase, beta pseudogene 11                                        |
| 1,225185332 | 0,12817 | 1,204137381 | 0,0273  | GUSBP3   | glucuronidase, beta pseudogene 3                                         |
| 0,876605721 | 0,51385 | 0,774319028 | 0,00772 | GXYLT1   | glucoside xylosyltransferase 1                                           |
| 0,791137301 | 0,23771 | 0,749499801 | 0,0023  | GXYLT1   | glucoside xylosyltransferase 1                                           |
| 1,350974085 | 0,11526 | 1,378405153 | 0,00088 | GXYLT2   | glucoside xylosyltransferase 2                                           |
| 1,192508872 | 0,1185  | 1,108800644 | 0,02342 | GYG2     | glycogenin 2                                                             |
| 1,096571589 | 0,297   | 1,120389214 | 0,04875 | GYPB     | glycophorin B (MNS blood group)                                          |
| 1,573524891 | 0,06202 | 1,704088819 | 0,00001 | GYPC     | glycophorin C (Gerbich blood group)                                      |
| 1,106497353 | 0,38324 | 1,153485605 | 0,02855 | H1FNT    | H1 histone family, member N, testis-specific                             |
| 1,448942155 | 0,23151 | 1,578987773 | 0,00014 | H1FX     | H1 histone family, member X                                              |
| 1,048262476 | 0,55496 | 1,139973273 | 0,03989 | H1FX-AS1 | H1FX antisense RNA 1 (non-protein coding)                                |
| 1,027401439 | 0,84738 | 1,20163605  | 0,03981 | H2AFX    | H2A histone family, member X                                             |
| 0,963261894 | 0,61817 | 1,091263877 | 0,04084 | H2AFY    | H2A histone family, member Y                                             |
| 0,755236293 | 0,30481 | 0,813379198 | 0,00529 | H2AFY    | H2A histone family, member Y                                             |
| 0,733058379 | 0,16673 | 0,847919965 | 0,00047 | H2AFY    | H2A histone family, member Y                                             |
| 0,549808075 | 0,05698 | 0,771640088 | 0,00463 | H3F3B    | H3 histone, family 3B (H3.3B)                                            |
| 0,593368399 | 0,1376  | 0,783497187 | 0,02395 | H3F3B    | H3 histone, family 3B (H3.3B)                                            |
| 1,059218335 | 0,64293 | 1,212512819 | 0,00189 | HAO      | 3-hydroxyanthranilate 3,4-dioxygenase                                    |
| 1,199139914 | 0,11619 | 1,237132479 | 0,00044 | HABP4    | hyaluronan binding protein 4                                             |
| 0,905633983 | 0,71277 | 0,665725807 | 0,00829 | HACE1    | HECT domain and ankyrin repeat containing, E3 ubiquitin protein ligase 1 |
| 0,912565489 | 0,51397 | 0,905006643 | 0,0243  | HADH     | hydroxyacyl-CoA dehydrogenase                                            |
| 0,828744904 | 0,08137 | 0,843815796 | 0,01484 | HADH     | hydroxyacyl-CoA dehydrogenase                                            |
| 1,198309021 | 0,07529 | 1,183451022 | 0,01576 | HAGHL    | hydroxyacylglutathione hydrolase-like                                    |
| 0,997922719 | 0,97847 | 1,133669413 | 0,02117 | HARB11   | harbinger transposase derived 1                                          |
| 0,68491649  | 0,05249 | 0,70270935  | 0,00087 | HAT1     | histone acetyltransferase 1                                              |
| 0,986232704 | 0,91462 | 0,832775771 | 0,00982 | HAUS1    | HAUS augmin-like complex, subunit 1                                      |
| 1,051901779 | 0,70426 | 0,908778116 | 0,04183 | HAUS2    | HAUS augmin-like complex, subunit 2                                      |
| 0,963261894 | 0,87927 | 0,744322628 | 0,00474 | HAUS3    | HAUS augmin-like complex, subunit 3                                      |
| 0,90062598  | 0,48537 | 0,759962428 | 0,00587 | HAUS6    | HAUS augmin-like complex, subunit 6                                      |
| 0,8962667   | 0,70287 | 0,666187413 | 0,00009 | HAUS6    | HAUS augmin-like complex, subunit 6                                      |
| 1,101905116 | 0,31292 | 1,20163605  | 0,00353 | HAVCR2   | hepatitis A virus cellular receptor 2                                    |
| 1,107264584 | 0,3291  | 1,185092771 | 0,00497 | HAVCR2   | hepatitis A virus cellular receptor 2                                    |
| 1,051901779 | 0,81154 | 1,127400412 | 0,03796 | HAX1     | HCLS1 associated protein X-1                                             |
| 1,021012126 | 0,82624 | 1,168777249 | 0,0314  | HBB      | hemoglobin, beta                                                         |
| 2,051956291 | 0,09423 | 2,573978495 | 0,00746 | HBB      | hemoglobin, beta                                                         |
| 1,923854909 | 0,10237 | 2,278366754 | 0,00558 | HBB      | hemoglobin, beta                                                         |
| 1,961558008 | 0,1129  | 2,550888783 | 0,0042  | HBB      | hemoglobin, beta                                                         |
| 1,054091423 | 0,5181  | 1,212512819 | 0,00351 | HBE1     | hemoglobin, epsilon 1                                                    |
| 1,133669413 | 0,1753  | 1,149494848 | 0,01947 | HBM      | hemoglobin, mu                                                           |
| 0,77916458  | 0,06799 | 0,798298386 | 0,02218 | HBP1     | HMG-box transcription factor 1                                           |
| 1,192508872 | 0,10015 | 1,203303026 | 0,00374 | HBO1     | hemoglobin, theta 1                                                      |
| 0,910669834 | 0,69457 | 0,720464874 | 0,00296 | HBS1L    | HBS1-like (S. cerevisiae)                                                |
| 0,986232704 | 0,88781 | 0,853226098 | 0,00206 | HBS1L    | HBS1-like (S. cerevisiae)                                                |
| 0,812815602 | 0,20377 | 0,77916458  | 0,00323 | HCCS     | holocytochrome c synthase                                                |
| 0,873572896 | 0,06405 | 0,824162085 | 0,00951 | HCCS     | holocytochrome c synthase                                                |
| 0,932386486 | 0,40819 | 1,114966219 | 0,02949 | HCFC1    | host cell factor C1 (VP16-accessory protein)                             |
| 1,009051634 | 0,96748 | 0,819036698 | 0,00548 | HCFC2    | host cell factor C2                                                      |
| 0,655196702 | 0,05462 | 0,723467443 | 0,00006 | HCG18    | HLA complex group 18 (non-protein coding)                                |
| 1,21335356  | 0,44902 | 0,806082831 | 0,01604 | HCG18    | HLA complex group 18 (non-protein coding)                                |
| 1,315854525 | 0,05558 | 1,159095952 | 0,00366 | HCG27    | HLA complex group 27 (non-protein coding)                                |
| 1,022428531 | 0,74091 | 1,156688184 | 0,00694 | HCN1     | hyperpolarization activated cyclic nucleotide-gated potassium channel 1  |
| 1,099616149 | 0,28073 | 1,100378609 | 0,04681 | HCRTR1   | hypocretin (orexin) receptor 1                                           |
| 1,07997656  | 0,45462 | 1,159095952 | 0,01604 | HCRTR2   | hypocretin (orexin) receptor 2                                           |
| 0,71548826  | 0,07729 | 0,868140228 | 0,00626 | HDAC1    | histone deacetylase 1                                                    |
| 1,057750964 | 0,44977 | 1,28788163  | 0,00001 | HDAC11   | histone deacetylase 11                                                   |
| 0,76950361  | 0,07086 | 0,860949188 | 0,00077 | HDAC2    | histone deacetylase 2                                                    |
| 0,934975198 | 0,27478 | 0,842062954 | 0,00354 | HDAC2    | histone deacetylase 2                                                    |
| 0,865736566 | 0,44259 | 0,768970416 | 0,00135 | HDAC4    | histone deacetylase 4                                                    |
| 0,780786493 | 0,22837 | 0,90062598  | 0,03688 | HDAC4    | histone deacetylase 4                                                    |
| 1,062159186 | 0,66717 | 1,257884972 | 0,00593 | HDAC6    | histone deacetylase 6                                                    |
| 0,918912883 | 0,50896 | 0,860352631 | 0,01549 | HDAC8    | histone deacetylase 8                                                    |
| 1,096571589 | 0,48749 | 1,123499903 | 0,022   | HDDC3    | HD domain containing 3                                                   |
| 1,104964485 | 0,33635 | 1,22858698  | 0,00495 | HDGFL1   | hepatoma derived growth factor-like 1                                    |
| 0,832775771 | 0,29393 | 0,805524291 | 0,00024 | HDHD2    | haloacid dehalogenase-like hydrolase domain containing 2                 |
| 0,934975198 | 0,81513 | 1,189207115 | 0,0269  | HDLBP    | high density lipoprotein binding protein                                 |
| 0,955282936 | 0,71342 | 0,869947353 | 0,04626 | HEATR1   | HEAT repeat containing 1                                                 |
| 0,967947027 | 0,87318 | 0,792784137 | 0,03648 | HEATR1   | HEAT repeat containing 1                                                 |
| 0,966606097 | 0,78704 | 0,811127156 | 0,00531 | HEATR3   | HEAT repeat containing 3                                                 |
| 0,949342121 | 0,669   | 0,831622098 | 0,00028 | HEATR3   | HEAT repeat containing 3                                                 |
| 1,001387256 | 0,98655 | 1,114193651 | 0,0267  | HEATR4   | HEAT repeat containing 4                                                 |
| 0,965267025 | 0,88957 | 0,868742185 | 0,03841 | HEATR5A  | HEAT repeat containing 5A                                                |
| 0,732042848 | 0,09323 | 0,796088099 | 0,00615 | HEATR5B  | HEAT repeat containing 5B                                                |
| 0,990342872 | 0,90027 | 0,895025071 | 0,03722 | HEATR6   | HEAT repeat containing 6                                                 |
| 0,90312651  | 0,28286 | 0,791137301 | 0,03353 | HEATR7A  | HEAT repeat containing 7A                                                |
| 1,067325338 | 0,48515 | 1,121943481 | 0,04467 | HEATR8   | HEAT repeat containing 8                                                 |
| 0,828170661 | 0,29425 | 0,691595315 | 0,00008 | HECTD1   | HECT domain containing 1                                                 |
| 1,035264924 | 0,89476 | 0,819604608 | 0,0117  | HECTD2   | HECT domain containing 2                                                 |
| 0,91383145  | 0,66656 | 0,750019495 | 0,00595 | HECW2    | HECT, C2 and WW domain containing E3 ubiquitin protein ligase 2          |
| 1,049716684 | 0,78999 | 1,234562607 | 0,01444 | HEG1     | HEG homolog 1 (zebrafish)                                                |

|             |         |             |         |            |                                                                            |
|-------------|---------|-------------|---------|------------|----------------------------------------------------------------------------|
| 1,172834949 | 0,11999 | 1,212512819 | 0,00269 | HELB       | helicase (DNA) B                                                           |
| 1,034547582 | 0,65848 | 1,153485605 | 0,01048 | HELB       | helicase (DNA) B                                                           |
| 0,646176415 | 0,1276  | 0,602903914 | 0       | HELLS      | helicase, lymphoid-specific                                                |
| 0,734075318 | 0,10836 | 0,856781955 | 0,02199 | HELLS      | helicase, lymphoid-specific                                                |
| 0,901875378 | 0,69362 | 0,773246337 | 0,01023 | HELLS      | helicase, lymphoid-specific                                                |
| 0,91319825  | 0,28536 | 0,821310701 | 0,0022  | HELQ       | helicase, POLQ-like                                                        |
| 0,882702996 | 0,30807 | 0,829319546 | 0,00402 | HELQ       | helicase, POLQ-like                                                        |
| 0,932386486 | 0,66306 | 0,866937564 | 0,00982 | HELQ       | helicase, POLQ-like                                                        |
| 1,142346247 | 0,30117 | 1,264003098 | 0,00373 | HELZ       | helicase with zinc finger                                                  |
| 0,89688816  | 0,38037 | 1,107264584 | 0,02024 | HEMK1      | HemK methyltransferase family member 1                                     |
| 1,124278924 | 0,34016 | 1,238848698 | 0,00015 | HEMK1      | HemK methyltransferase family member 1                                     |
| 1,22010051  | 0,09844 | 1,210833084 | 0,00048 | HEMK1      | HemK methyltransferase family member 1                                     |
| 1,02313747  | 0,87031 | 1,194163187 | 0,00321 | HEMK1      | HemK methyltransferase family member 1                                     |
| 0,778624691 | 0,22308 | 0,813379198 | 0,00017 | HERC2      | hect domain and RLD 2                                                      |
| 0,955282936 | 0,67009 | 0,849684999 | 0,00304 | HERC3      | hect domain and RLD 3                                                      |
| 0,669427628 | 0,13159 | 0,820741609 | 0,00039 | HERC4      | hect domain and RLD 4                                                      |
| 0,721464343 | 0,19718 | 0,756808396 | 0,00018 | HERC4      | hect domain and RLD 4                                                      |
| 0,855595026 | 0,16745 | 0,844400887 | 0,005   | HERC4      | hect domain and RLD 4                                                      |
| 0,708578698 | 0,14377 | 0,709561678 | 0,00694 | HERC6      | hect domain and RLD 6                                                      |
| 0,85027416  | 0,63737 | 0,800514811 | 0,0061  | HERPUD2    | HERPUD family member 2                                                     |
| 0,823591017 | 0,25535 | 0,789493887 | 0,0011  | HERPUD2    | HERPUD family member 2                                                     |
| 1,034547582 | 0,73418 | 1,101141598 | 0,03274 | HES1       | hairy and enhancer of split 1, (Drosophila)                                |
| 0,932386486 | 0,46066 | 0,925304428 | 0,03716 | HES2       | hairy and enhancer of split 2 (Drosophila)                                 |
| 0,808881348 | 0,25549 | 0,85086373  | 0,00943 | HES2       | hairy and enhancer of split 2 (Drosophila)                                 |
| 1,132098902 | 0,48485 | 1,340712592 | 0       | HEXA       | hexosaminidase A (alpha polypeptide)                                       |
| 0,952637998 | 0,81912 | 1,190856849 | 0,00192 | HEXB       | hexosaminidase B (beta polypeptide)                                        |
| 1,047536127 | 0,71835 | 1,29145735  | 0,00123 | HEXDC      | hexosaminidase (glycosyl hydrolase family 20, catalytic domain) containing |
| 0,952637998 | 0,68425 | 0,866937564 | 0,0185  | HEXIM1     | hexamethylene bis-acetamide inducible                                      |
| 1,194163187 | 0,08192 | 1,180174343 | 0,0028  | HEY1       | hairy/enhancer-of-split related with YRPW motif 1                          |
| 1,426025717 | 0,10016 | 1,277213759 | 0,00989 | HEY1       | hairy/enhancer-of-split related with YRPW motif 1                          |
| 1,203303026 | 0,08517 | 1,304954948 | 0,00157 | HFE        | hemochromatosis                                                            |
| 1,198309021 | 0,09117 | 1,174461971 | 0,01035 | HFE        | hemochromatosis                                                            |
| 0,96727633  | 0,72786 | 1,147107024 | 0,01779 | HFE        | hemochromatosis                                                            |
| 1,145517898 | 0,16618 | 1,28877463  | 0,00165 | HFE        | hemochromatosis                                                            |
| 1,167967395 | 0,08962 | 1,159899655 | 0,00225 | HFE        | hemochromatosis                                                            |
| 1,113421618 | 0,41565 | 1,183451022 | 0,00809 | HFE        | hemochromatosis                                                            |
| 0,757333158 | 0,06059 | 0,845572287 | 0,00428 | HGSNAT     | heparan-alpha-glucosaminide N-acetyltransferase                            |
| 0,842062954 | 0,10468 | 0,867538687 | 0,04246 | HGSNAT     | heparan-alpha-glucosaminide N-acetyltransferase                            |
| 0,971980988 | 0,71385 | 0,911933166 | 0,0401  | HGSNAT     | heparan-alpha-glucosaminide N-acetyltransferase                            |
| 0,957271458 | 0,67654 | 0,870550563 | 0,02841 | HHAT       | hedgehog acyltransferase                                                   |
| 1,081474763 | 0,54535 | 1,113421618 | 0,0123  | HHATL      | hedgehog acyltransferase-like                                              |
| 1,17772279  | 0,14816 | 1,200803427 | 0,00282 | HHL2       | HHL2                                                                       |
| 0,989656656 | 0,92202 | 1,190031696 | 0,0216  | HHLA1      | HERV-H LTR-associating 1                                                   |
| 1,142346247 | 0,21049 | 1,10343374  | 0,04618 | HHLA3      | HERV-H LTR-associating 3                                                   |
| 0,976708529 | 0,87123 | 0,773782497 | 0,01277 | HIAT1      | hippocampus abundant transcript 1                                          |
| 1,481439798 | 0,07142 | 1,29056249  | 0,02383 | HIBADH     | 3-hydroxyisobutyrate dehydrogenase                                         |
| 1,169587664 | 0,16147 | 1,28877463  | 0,0083  | HIC1       | hypermethylated in cancer 1                                                |
| 0,907519155 | 0,46876 | 0,807760778 | 0,00767 | HIC2       | hypermethylated in cancer 2                                                |
| 0,847332435 | 0,56365 | 0,801069878 | 0,00318 | HIC2       | hypermethylated in cancer 2                                                |
| 0,760489377 | 0,13053 | 0,742261785 | 0,0006  | HIGD1A     | HIG1 hypoxia inducible domain family, member 1A                            |
| 0,758909626 | 0,14664 | 0,706616822 | 0,00105 | HIGD1A     | HIG1 hypoxia inducible domain family, member 1A                            |
| 0,719965659 | 0,24923 | 0,662503509 | 0,00025 | HIGD1A     | HIG1 hypoxia inducible domain family, member 1A                            |
| 1,008352455 | 0,92655 | 1,145517898 | 0,03518 | HIGD1B     | HIG1 hypoxia inducible domain family, member 1B                            |
| 0,930449658 | 0,57108 | 1,145517898 | 0,01308 | HIGD2A     | HIG1 hypoxia inducible domain family, member 2A                            |
| 1,209994089 | 0,17099 | 1,148698355 | 0,0327  | HILS1      | histone linker H1 domain, spermatid-specific 1                             |
| 0,857376037 | 0,35663 | 0,784584098 | 0,0018  | HINT1      | histidine triad nucleotide binding protein 1                               |
| 0,878430468 | 0,23988 | 0,868140228 | 0,02698 | HINT1      | histidine triad nucleotide binding protein 1                               |
| 0,820172911 | 0,06771 | 0,636397468 | 0,00001 | HINT3      | histidine triad nucleotide binding protein 3                               |
| 1,07549439  | 0,71539 | 0,710053679 | 0,01128 | HINT3      | histidine triad nucleotide binding protein 3                               |
| 0,972654947 | 0,72171 | 0,889458994 | 0,0297  | HIP1       | huntingtin interacting protein 1                                           |
| 1,025267238 | 0,79582 | 1,187559666 | 0,0213  | HIP1       | huntingtin interacting protein 1                                           |
| 0,816768991 | 0,41432 | 0,757333158 | 0,02258 | HIPK1      | homeodomain interacting protein kinase 1                                   |
| 0,763129604 | 0,33575 | 0,701735863 | 0,00007 | HIPK1      | homeodomain interacting protein kinase 1                                   |
| 0,754190038 | 0,19363 | 0,779704843 | 0,01787 | HIPK1      | homeodomain interacting protein kinase 1                                   |
| 0,802737389 | 0,26044 | 0,810003474 | 0,00003 | HIPK3      | homeodomain interacting protein kinase 3                                   |
| 1,031683179 | 0,78118 | 1,20664392  | 0,00054 | HIRIP3     | HIRA interacting protein 3                                                 |
| 1,054091423 | 0,6069  | 1,168777249 | 0,00791 | HIST1H1D   | histone cluster 1, H1d                                                     |
| 0,939522749 | 0,58576 | 1,229438867 | 0,00152 | HIST1H3H   | histone cluster 1, H3h                                                     |
| 1,175276328 | 0,1157  | 1,109569472 | 0,03508 | HIST1H3J   | histone cluster 1, H3j                                                     |
| 0,885153765 | 0,18184 | 0,906890329 | 0,04463 | HIST1H4B   | histone cluster 1, H4b                                                     |
| 0,921464186 | 0,81117 | 0,785128119 | 0,01259 | HIST1H4C   | histone cluster 1, H4c                                                     |
| 1,059218335 | 0,67999 | 0,906261938 | 0,04999 | HIST2H2AA3 | histone cluster 2, H2aa3                                                   |
| 0,863938187 | 0,43784 | 0,756808396 | 0,01723 | HIVEP1     | human immunodeficiency virus type I enhancer binding protein 1             |
| 0,78024548  | 0,09008 | 0,860352631 | 0,00656 | HIVEP2     | human immunodeficiency virus type I enhancer binding protein 2             |
| 1,093535457 | 0,27831 | 1,16634937  | 0,03142 | HIVEP3     | human immunodeficiency virus type I enhancer binding protein 3             |
| 1,074004472 | 0,38398 | 1,147902414 | 0,01097 | HIVEP3     | human immunodeficiency virus type I enhancer binding protein 3             |
| 0,777546036 | 0,15944 | 0,752623374 | 0,02301 | HIVEP3     | human immunodeficiency virus type I enhancer binding protein 3             |
| 1,108800644 | 0,18736 | 1,227735684 | 0,00117 | HJURP      | Holliday junction recognition protein                                      |
| 0,976708529 | 0,90646 | 0,856781955 | 0,02089 | HK2        | hexokinase 2                                                               |
| 1,181811547 | 0,10445 | 1,156688184 | 0,01163 | HK3        | hexokinase 3 (white cell)                                                  |
| 1,101141598 | 0,47033 | 1,212512819 | 0,00032 | HLA-A      | major histocompatibility complex, class I, A                               |
| 0,986916546 | 0,96131 | 1,336074078 | 0,00005 | HLA-A      | major histocompatibility complex, class I, A                               |
| 1,00486382  | 0,99015 | 1,269270886 | 0,00944 | HLA-B      | major histocompatibility complex, class I, B                               |
| 1,035982764 | 0,90929 | 1,372684431 | 0,00007 | HLA-B      | major histocompatibility complex, class I, B                               |
| 1,060687741 | 0,8914  | 1,343503426 | 0,00253 | HLA-B      | major histocompatibility complex, class I, B                               |
| 1,130530567 | 0,64953 | 1,427014506 | 0       | HLA-C      | major histocompatibility complex, class I, C                               |
| 1,118837101 | 0,72175 | 1,409320755 | 0,00041 | HLA-C      | major histocompatibility complex, class I, C                               |
| 1,1772279   | 0,55134 | 1,446934886 | 0       | HLA-C      | major histocompatibility complex, class I, C                               |
| 1,327765158 | 0,05744 | 1,373636233 | 0,00001 | HLA-C      | major histocompatibility complex, class I, C                               |
| 1,520978753 | 0,13143 | 1,682958965 | 0,00002 | HLA-DMA    | major histocompatibility complex, class II, DM alpha                       |
| 1,027401439 | 0,79341 | 1,160703914 | 0,01306 | HLA-DOA    | major histocompatibility complex, class II, DO alpha                       |
| 1,131314463 | 0,34005 | 1,272794935 | 0,00323 | HLA-DOA    | major histocompatibility complex, class II, DO alpha                       |
| 1,225185332 | 0,10365 | 1,336074078 | 0,00293 | HLA-DPA1   | major histocompatibility complex, class II, DP alpha 1                     |
| 0,96727633  | 0,92042 | 1,479387509 | 0,00043 | HLA-DPA1   | major histocompatibility complex, class II, DP alpha 1                     |
| 1,134455485 | 0,42072 | 1,377450046 | 0,00344 | HLA-DPB1   | major histocompatibility complex, class II, DP beta 1                      |
| 1,250062303 | 0,11892 | 1,352848231 | 0,03899 | HLA-DQA1   | major histocompatibility complex, class II, DQ alpha 1                     |
| 1,25092908  | 0,10583 | 1,21672359  | 0,04411 | HLA-DQB1   | major histocompatibility complex, class II, DQ beta 1                      |
| 1,018891197 | 0,95537 | 1,333298677 | 0,00638 | HLA-DQB1   | major histocompatibility complex, class II, DQ beta 1                      |
| 1,115739322 | 0,617   | 1,388955136 | 0,00274 | HLA-DQB1   | major histocompatibility complex, class II, DQ beta 1                      |
| 1,088242442 | 0,74358 | 1,204972315 | 0,02415 | HLA-DQB1   | major histocompatibility complex, class II, DQ beta 1                      |
| 1,152686347 | 0,47398 | 1,326845141 | 0,00308 | HLA-DQB1   | major histocompatibility complex, class II, DQ beta 1                      |
| 0,995849753 | 0,97102 | 1,132098902 | 0,04258 | HLA-DQB1   | major histocompatibility complex, class II, DQ beta 1                      |
| 1,112650121 | 0,86193 | 1,372684431 | 0,00759 | HLA-DRA    | major histocompatibility complex, class II, DR alpha                       |
| 1,175276328 | 0,66519 | 1,417157397 | 0,00334 | HLA-DRA    | major histocompatibility complex, class II, DR alpha                       |

|             |         |             |         |            |                                                                                           |
|-------------|---------|-------------|---------|------------|-------------------------------------------------------------------------------------------|
| 1,160703914 | 0,39033 | 1,387030969 | 0,00016 | HLA-DRB6   | major histocompatibility complex, class II, DR beta 6 (pseudogene)                        |
| 0,965936329 | 0,88855 | 1,240567298 | 0,00656 | HLA-E      | major histocompatibility complex, class I, E                                              |
| 0,97874165  | 0,91645 | 1,139973273 | 0,01371 | HLA-E      | major histocompatibility complex, class I, E                                              |
| 1,056285625 | 0,82003 | 1,352848231 | 0,00021 | HLA-F      | major histocompatibility complex, class I, F                                              |
| 1,125058485 | 0,62225 | 1,350974085 | 0,00024 | HLA-F      | major histocompatibility complex, class I, F                                              |
| 1,307671349 | 0,31289 | 1,268391399 | 0,00089 | HLA-G      | major histocompatibility complex, class I, G                                              |
| 1,163120042 | 0,62961 | 1,311302014 | 0,00016 | HLA-G      | major histocompatibility complex, class I, G                                              |
| 1,0181852   | 0,94881 | 1,312211255 | 0,00042 | HLA-G      | major histocompatibility complex, class I, G                                              |
| 0,969289817 | 0,87183 | 1,219255094 | 0,00277 | HLA-G      | major histocompatibility complex, class I, G                                              |
| 1,159095952 | 0,15093 | 1,121943481 | 0,02905 | HLCS       | holocarboxylase synthetase (biotin-(propionyl)-CoA-carboxylase (ATP-hydrolysing)) ligase) |
| 0,939522749 | 0,79909 | 1,275444392 | 0,01149 | HM13       | histocompatibility (minor) 13                                                             |
| 1,081474763 | 0,35601 | 1,150291893 | 0,02154 | HMCN2      | hemicentin 2                                                                              |
| 1,101141598 | 0,42295 | 1,278985581 | 0,00561 | HMCN2      | hemicentin 2                                                                              |
| 0,860949188 | 0,07874 | 0,874784765 | 0,01296 | HMG2       | high mobility group AT-hook 2                                                             |
| 0,819604608 | 0,38295 | 0,880869374 | 0,04627 | HMG2       | high mobility group AT-hook 2                                                             |
| 0,863339559 | 0,22412 | 0,867538687 | 0,00378 | HMG1       | high mobility group box 1                                                                 |
| 0,909408252 | 0,40012 | 0,917004043 | 0,04402 | HMG1       | high mobility group box 1                                                                 |
| 0,788400174 | 0,1896  | 0,759962428 | 0,00007 | HMG1       | high mobility group box 1                                                                 |
| 0,908778116 | 0,2761  | 0,889458994 | 0,00799 | HMG3       | high mobility group box 3                                                                 |
| 0,995159722 | 0,97203 | 1,124278924 | 0,01875 | HMGCL      | 3-hydroxymethyl-3-methylglutaryl-CoA lyase                                                |
| 0,653835674 | 0,12612 | 0,692554734 | 0,00009 | HMGCS1     | 3-hydroxy-3-methylglutaryl-CoA synthase 1 (soluble)                                       |
| 0,771105413 | 0,11738 | 0,866336856 | 0,00487 | HMG1       | high mobility group nucleosome binding domain 1                                           |
| 0,743806881 | 0,08986 | 0,770571108 | 0,00017 | HMG3       | high mobility group nucleosomal binding domain 3                                          |
| 0,817335328 | 0,36854 | 0,697371833 | 0,00198 | HMG5       | high mobility group nucleosome binding domain 5                                           |
| 1,211672666 | 0,11215 | 1,157490217 | 0,00267 | HMGXB3     | HMG box domain containing 3                                                               |
| 1,001387256 | 0,99025 | 1,099616149 | 0,02966 | HMX1       | H6 family homeobox 1                                                                      |
| 0,848507902 | 0,05961 | 0,880259014 | 0,01065 | HN1L       | hematological and neurological expressed 1-like                                           |
| 1,198309021 | 0,07187 | 1,170398641 | 0,01364 | HNFA4      | hepatocyte nuclear factor 4, alpha                                                        |
| 1,030253954 | 0,88112 | 0,805524291 | 0,04497 | HNMT       | histamine N-methyltransferase                                                             |
| 0,933679945 | 0,61384 | 0,865736566 | 0,02675 | HNRNPA0    | heterogeneous nuclear ribonucleoprotein A0                                                |
| 0,866336856 | 0,2538  | 0,911933166 | 0,04314 | HNRNPA1    | heterogeneous nuclear ribonucleoprotein A1                                                |
| 0,751059963 | 0,13889 | 0,854409741 | 0,02519 | HNRNPA2B1  | heterogeneous nuclear ribonucleoprotein A2/B1                                             |
| 0,778085177 | 0,15149 | 0,738157203 | 0,00039 | HNRNPA3    | heterogeneous nuclear ribonucleoprotein A3                                                |
| 0,641268301 | 0,08904 | 0,839731493 | 0,02758 | HNRNPAB    | heterogeneous nuclear ribonucleoprotein A/B                                               |
| 0,908148418 | 0,42461 | 0,87175824  | 0,0089  | HNRNPC     | heterogeneous nuclear ribonucleoprotein C (C1/C2)                                         |
| 0,991716731 | 0,96596 | 0,816230346 | 0,00575 | HNRNPC     | heterogeneous nuclear ribonucleoprotein C (C1/C2)                                         |
| 0,933032992 | 0,48634 | 0,807201075 | 0,00077 | HNRNPC     | heterogeneous nuclear ribonucleoprotein C (C1/C2)                                         |
| 0,85027416  | 0,08214 | 0,840313752 | 0,00038 | HNRNPD     | heterogeneous nuclear ribonucleoprotein D (AU-rich element RNA binding protein 1, 37kDa)  |
| 0,617281303 | 0,08059 | 0,777546036 | 0,0003  | HNRNPD     | heterogeneous nuclear ribonucleoprotein D (AU-rich element RNA binding protein 1, 37kDa)  |
| 0,841479482 | 0,45119 | 0,666187413 | 0,00007 | HNRNPD     | heterogeneous nuclear ribonucleoprotein D (AU-rich element RNA binding protein 1, 37kDa)  |
| 0,864537231 | 0,07307 | 0,86934456  | 0,00116 | HNRNPD     | heterogeneous nuclear ribonucleoprotein D (AU-rich element RNA binding protein 1, 37kDa)  |
| 1,035264924 | 0,85465 | 0,742261785 | 0,00268 | HNRNPD     | heterogeneous nuclear ribonucleoprotein D (AU-rich element RNA binding protein 1, 37kDa)  |
| 0,774855931 | 0,23043 | 0,736623843 | 0,01933 | HNRNPH2    | heterogeneous nuclear ribonucleoprotein H2 (H')                                           |
| 0,951318276 | 0,69181 | 0,831622098 | 0,0071  | HNRNPK     | heterogeneous nuclear ribonucleoprotein K                                                 |
| 1,076240125 | 0,51685 | 1,147902414 | 0,01765 | HNRNPM     | heterogeneous nuclear ribonucleoprotein M                                                 |
| 0,942784536 | 0,34515 | 1,125838586 | 0,00914 | HNRNPM     | heterogeneous nuclear ribonucleoprotein M                                                 |
| 0,838568184 | 0,37086 | 0,822450069 | 0,04945 | HNRNPM     | heterogeneous nuclear ribonucleoprotein M                                                 |
| 0,860949188 | 0,39261 | 0,801069878 | 0,00144 | HNRNPR     | heterogeneous nuclear ribonucleoprotein R                                                 |
| 0,988285652 | 0,94435 | 0,840896415 | 0,03474 | HNRNPR     | heterogeneous nuclear ribonucleoprotein R                                                 |
| 0,786217292 | 0,15362 | 0,859756486 | 0,03253 | HNRNPU     | heterogeneous nuclear ribonucleoprotein U (scaffold attachment factor A)                  |
| 0,557096825 | 0,13971 | 0,655196702 | 0,00556 | HNRPLD     | heterogeneous nuclear ribonucleoprotein D-like                                            |
| 0,7944344   | 0,24622 | 0,862143545 | 0,03457 | HNRPLD     | heterogeneous nuclear ribonucleoprotein D-like                                            |
| 0,96727633  | 0,79955 | 0,819036698 | 0,02548 | HNRPLL     | heterogeneous nuclear ribonucleoprotein L-like                                            |
| 0,806082831 | 0,23192 | 0,793883931 | 0,00216 | HOMER1     | homer homolog 1 (Drosophila)                                                              |
| 0,831045862 | 0,43007 | 0,691595315 | 0,00226 | HOOK3      | hook homolog 3 (Drosophila)                                                               |
| 0,91319825  | 0,62955 | 0,785672517 | 0,02384 | HOOK3      | hook homolog 3 (Drosophila)                                                               |
| 0,740206649 | 0,26517 | 0,722966147 | 0,00667 | HOOK3      | hook homolog 3 (Drosophila)                                                               |
| 0,732042848 | 0,0909  | 0,681601304 | 0,01721 | HOPX       | HOP homeobox                                                                              |
| 0,886381699 | 0,51639 | 0,597909898 | 0,0008  | HORMAD1    | HORMA domain containing 1                                                                 |
| 1,143138335 | 0,14848 | 1,20163605  | 0,00589 | HORMAD2    | HORMA domain containing 2                                                                 |
| 1,07549439  | 0,47267 | 1,237990291 | 0,00038 | HOXA11     | homeobox A11                                                                              |
| 1,147107024 | 0,17841 | 1,088997015 | 0,03544 | HOXA7      | homeobox A7                                                                               |
| 1,104198847 | 0,42489 | 1,109569472 | 0,04782 | HOXB13     | homeobox B13                                                                              |
| 1,118837101 | 0,27261 | 1,098854218 | 0,03738 | HOXB13-AS1 | HOXB13 antisense RNA 1 (non-protein coding)                                               |
| 1,016070143 | 0,88137 | 1,190856849 | 0,00068 | HOXB5      | homeobox B5                                                                               |
| 1,285206337 | 0,05941 | 1,112650121 | 0,04347 | HOXB7      | homeobox B7                                                                               |
| 1,043911927 | 0,63082 | 1,167158102 | 0,00283 | HOXB9      | homeobox B9                                                                               |
| 1,02313747  | 0,82639 | 1,136816973 | 0,00874 | HOXC11     | homeobox C11                                                                              |
| 1,043911927 | 0,58379 | 1,171210181 | 0,00618 | HOXC9      | homeobox C9                                                                               |
| 0,986916546 | 0,91598 | 1,136816973 | 0,02804 | HOXD10     | homeobox D10                                                                              |
| 1,112650121 | 0,41853 | 1,21167266  | 0,00005 | HOXD3      | homeobox D3                                                                               |
| 0,946057647 | 0,48017 | 1,092777739 | 0,04951 | HOXD4      | homeobox D4                                                                               |
| 0,874784765 | 0,5094  | 0,782411782 | 0,00003 | HP1BP3     | heterochromatin protein 1, binding protein 3                                              |
| 1,180992661 | 0,28775 | 1,185914499 | 0,00535 | HPCAL1     | hippocalcin-like 1                                                                        |
| 0,959929261 | 0,71765 | 0,715984371 | 0,00057 | HPRT1      | hypoxanthine phosphoribosyltransferase 1                                                  |
| 0,991716731 | 0,93393 | 1,128182137 | 0,04715 | HPS1       | Hermansky-Pudlak syndrome 1                                                               |
| 1,132883885 | 0,20224 | 1,203303026 | 0,04514 | HPS3       | Hermansky-Pudlak syndrome 3                                                               |
| 0,856781955 | 0,45738 | 0,778085177 | 0,00279 | HPS5       | Hermansky-Pudlak syndrome 5                                                               |
| 0,745872013 | 0,10054 | 0,808320869 | 0,03384 | HPSE       | heparanase                                                                                |
| 1,116512962 | 0,45516 | 1,192508872 | 0,02132 | HPSE2      | heparanase 2                                                                              |
| 1,200803427 | 0,16244 | 1,298638603 | 0,00335 | HPX        | hemopexin                                                                                 |
| 1,164733586 | 0,12797 | 1,218410264 | 0,00043 | HPX        | hemopexin                                                                                 |
| 0,566049451 | 0,0923  | 0,793333843 | 0,0439  | HRAS       | v-Ha-ras Harvey rat sarcoma viral oncogene homolog                                        |
| 0,797192477 | 0,09754 | 0,620283649 | 0,00002 | HRASL5     | HRAS-like suppressor                                                                      |
| 0,96996191  | 0,65924 | 1,110338834 | 0,02981 | HRASL5     | HRAS-like suppressor family, member 5                                                     |
| 1,099616149 | 0,41045 | 1,192508872 | 0,00362 | HRH3       | histamine receptor H3                                                                     |
| 1,033830736 | 0,70454 | 1,195819797 | 0,00278 | HS1BP3     | HCLS1 binding protein 3                                                                   |
| 1,149494848 | 0,44565 | 0,820172911 | 0,02231 | HS2ST1     | heparan sulfate 2-O-sulfotransferase 1                                                    |
| 0,899378312 | 0,35112 | 0,762600827 | 0,0031  | HS3ST3A1   | heparan sulfate (glucosamine) 3-O-sulfotransferase 3A1                                    |
| 0,949342121 | 0,60757 | 1,135242102 | 0,02418 | HSD11B1L   | hydroxysteroid (11-beta) dehydrogenase 1-like                                             |
| 1,072516617 | 0,51249 | 1,190856849 | 0,00851 | HSD11B1L   | hydroxysteroid (11-beta) dehydrogenase 1-like                                             |
| 0,816768991 | 0,05643 | 0,816768991 | 0,01205 | HSD17B1    | hydroxysteroid (17-beta) dehydrogenase 1                                                  |
| 0,865736566 | 0,35878 | 0,844400887 | 0,00168 | HSD17B12   | hydroxysteroid (17-beta) dehydrogenase 12                                                 |
| 1,085229372 | 0,50636 | 1,174461971 | 0,0093  | HSD17B14   | hydroxysteroid (17-beta) dehydrogenase 14                                                 |
| 1,167158102 | 0,09979 | 1,198309021 | 0,00586 | HSD17B14   | hydroxysteroid (17-beta) dehydrogenase 14                                                 |
| 1,244874235 | 0,09815 | 1,419123356 | 0,00081 | HSD17B14   | hydroxysteroid (17-beta) dehydrogenase 14                                                 |
| 1,193335743 | 0,06953 | 1,227735684 | 0,00054 | HSD17B3    | hydroxysteroid (17-beta) dehydrogenase 3                                                  |
| 1,062159186 | 0,32897 | 1,104964485 | 0,03297 | HSD3B1     | hydroxy-delta-5-steroid dehydrogenase, 3 beta- and steroid delta-isomerase 1              |
| 0,685391402 | 0,12601 | 0,734584317 | 0,0001  | HSDL2      | hydroxysteroid dehydrogenase like 2                                                       |
| 0,739693755 | 0,07453 | 0,758383773 | 0,0072  | HSF2       | heat shock transcription factor 2                                                         |
| 1,132883885 | 0,64959 | 1,516767545 | 0       | HSP90B1    | heat shock protein 90kDa beta (Grp94), member 1                                           |
| 1,358486285 | 0,05971 | 1,52308874  | 0,00557 | HSPA12B    | heat shock 70kD protein 12B                                                               |
| 1,128964405 | 0,2499  | 1,172834949 | 0,03742 | HSPA12B    | heat shock 70kD protein 12B                                                               |
| 0,8362464   | 0,15512 | 0,880869374 | 0,01464 | HSPA14     | heat shock 70kDa protein 14                                                               |

|             |         |             |         |         |                                                                        |
|-------------|---------|-------------|---------|---------|------------------------------------------------------------------------|
| 1,076240125 | 0,72088 | 0,756283999 | 0,01193 | HSPA14  | heat shock 70kDa protein 14                                            |
| 1,140763716 | 0,19636 | 1,180992661 | 0,00043 | HSPA1L  | heat shock 70kDa protein 1-like                                        |
| 0,777007269 | 0,16308 | 0,709070018 | 0,00027 | HSPA4   | heat shock 70kDa protein 4                                             |
| 0,686818117 | 0,0537  | 0,865736566 | 0,01284 | HSPA4   | heat shock 70kDa protein 4                                             |
| 0,631126016 | 0,15055 | 0,785672517 | 0,00326 | HSPA4   | heat shock 70kDa protein 4                                             |
| 0,978063473 | 0,85902 | 1,219255094 | 0,04272 | HSPA6   | heat shock 70kDa protein 6 (HSP70B)                                    |
| 0,866336856 | 0,48116 | 0,78132788  | 0,00051 | HSPA9   | heat shock 70kDa protein 9 (mortalin)                                  |
| 1,29056249  | 0,07714 | 1,215036792 | 0,01623 | HSPB2   | heat shock 27kDa protein 2                                             |
| 1,158292806 | 0,23826 | 1,194163187 | 0,04635 | HSPB6   | heat shock protein, alpha-crystallin-related, B6                       |
| 1,022428531 | 0,87723 | 1,295940965 | 0,00988 | HSPB6   | heat shock protein, alpha-crystallin-related, B6                       |
| 1,111879158 | 0,19659 | 1,153485605 | 0,00673 | HSPB7   | heat shock 27kDa protein family, member 7 (cardiovascular)             |
| 1,220946513 | 0,05035 | 1,28788163  | 0,00215 | HSPC072 | hypothetical LOC29075                                                  |
| 1,349102534 | 0,16356 | 1,561572985 | 0,00038 | HSPG2   | heparan sulfate proteoglycan 2                                         |
| 1,319507911 | 0,21615 | 1,321338406 | 0,01658 | HSPG2   | heparan sulfate proteoglycan 2                                         |
| 0,706127202 | 0,07578 | 0,671751713 | 0,0001  | HTATIP2 | HIV-1 Tat interactive protein 2, 30kDa                                 |
| 1,006257823 | 0,91446 | 1,092020546 | 0,01726 | HTN1    | histatin 1                                                             |
| 1,00765376  | 0,93067 | 1,190031696 | 0,01067 | HTR1A   | 5-hydroxytryptamine (serotonin) receptor 1A                            |
| 1,242288282 | 0,12708 | 1,123499903 | 0,04358 | HTR1B   | 5-hydroxytryptamine (serotonin) receptor 1B                            |
| 1,143930973 | 0,19881 | 1,392811481 | 0,00006 | HTR4    | 5-hydroxytryptamine (serotonin) receptor 4                             |
| 1,137605228 | 0,12688 | 1,142346247 | 0,03124 | HTR6    | 5-hydroxytryptamine (serotonin) receptor 6                             |
| 1,095052471 | 0,46803 | 1,148698355 | 0,03765 | HTR7    | 5-hydroxytryptamine (serotonin) receptor 7 (adenylyl cyclase-coupled)  |
| 1,000693387 | 0,99763 | 1,399585866 | 0,00547 | HTRA1   | HtrA serine peptidase 1                                                |
| 1,033830736 | 0,8475  | 1,16634937  | 0,00595 | HTRA2   | HtrA serine peptidase 2                                                |
| 1,050444544 | 0,69916 | 1,145517898 | 0,02976 | HTRA2   | HtrA serine peptidase 2                                                |
| 0,842062954 | 0,06534 | 0,836826243 | 0,02765 | HUNK    | hormonally up-regulated Neu-associated kinase                          |
| 0,924663278 | 0,43165 | 0,833931044 | 0,00019 | HUS1    | HUS1 checkpoint homolog (S. pombe)                                     |
| 1,190856849 | 0,32943 | 0,891310496 | 0,03441 | HUS1    | HUS1 checkpoint homolog (S. pombe)                                     |
| 1,249196126 | 0,08679 | 1,154285418 | 0,03858 | HVCN1   | hydrogen voltage-gated channel 1                                       |
| 0,948684315 | 0,54711 | 1,092777739 | 0,04919 | HYDIN2  | hydrocephalus inducing homolog 2 (mouse)                               |
| 1,153485605 | 0,39676 | 1,231998073 | 0,00834 | HYI     | hydroxyppyruvate isomerase (putative)                                  |
| 1,022428531 | 0,92039 | 0,776468875 | 0,00634 | HYMAI   | hydatidiform mole associated and imprinted (non-protein coding)        |
| 1,576800348 | 0,05862 | 1,4054187   | 0,00054 | HYOU1   | hypoxia up-regulated 1                                                 |
| 0,794985251 | 0,05478 | 0,819036698 | 0,00284 | IARS    | isoleucyl-tRNA synthetase                                              |
| 0,924663278 | 0,69775 | 0,815072332 | 0,00125 | IBTK    | inhibitor of Bruton agammaglobulinemia tyrosine kinase                 |
| 1,000693387 | 0,99459 | 1,190856849 | 0,00269 | ICA1    | islet cell autoantigen 1, 69kDa                                        |
| 1,05750964  | 0,67659 | 1,135242102 | 0,03385 | ICA1    | islet cell autoantigen 1, 69kDa                                        |
| 1,068065408 | 0,64807 | 1,337000495 | 0,0337  | ICAM1   | intercellular adhesion molecule 1                                      |
| 1,083725967 | 0,53985 | 1,337000495 | 0,00245 | ICAM1   | intercellular adhesion molecule 1                                      |
| 1,221793102 | 0,05266 | 1,236275261 | 0,00291 | ICOS    | inducible T-cell co-stimulator                                         |
| 1,058484395 | 0,52381 | 1,167158102 | 0,00522 | ICOSLG  | inducible T-cell co-stimulator ligand                                  |
| 0,74277646  | 0,15156 | 0,686818117 | 0,00059 | ID4     | inhibitor of DNA binding 4, dominant negative helix-loop-helix protein |
| 0,657927263 | 0,06025 | 0,656105627 | 0,00046 | ID4     | inhibitor of DNA binding 4, dominant negative helix-loop-helix protein |
| 0,87417862  | 0,43717 | 0,649319301 | 0,00108 | ID4     | inhibitor of DNA binding 4, dominant negative helix-loop-helix protein |
| 0,754712984 | 0,16873 | 0,844400887 | 0,0026  | IDE     | insulin-degrading enzyme                                               |
| 0,821310701 | 0,08486 | 0,827596816 | 0,04712 | IDH1    | isocitrate dehydrogenase 1 (NADP+), soluble                            |
| 1,030968319 | 0,73701 | 1,155085785 | 0,01476 | IDI1    | isopentenyl-diphosphate delta isomerase 1                              |
| 0,785128119 | 0,09762 | 0,670821112 | 0,00007 | IDS     | iduronate 2-sulfatase                                                  |
| 0,894404902 | 0,36325 | 0,778624691 | 0,00015 | IDS     | iduronate 2-sulfatase                                                  |
| 0,976031761 | 0,8298  | 0,831622098 | 0,02774 | IDS     | iduronate 2-sulfatase                                                  |
| 1,043911927 | 0,50861 | 0,890075733 | 0,02036 | IDS     | iduronate 2-sulfatase                                                  |
| 0,726986259 | 0,11915 | 0,820741609 | 0,00812 | IDS     | iduronate 2-sulfatase                                                  |
| 0,806082831 | 0,15441 | 0,849096246 | 0,00352 | IDS     | iduronate 2-sulfatase                                                  |
| 1,019597683 | 0,92684 | 1,236275261 | 0,04816 | IDUA    | iduronidase, alpha-L-                                                  |
| 1,16634937  | 0,15471 | 1,167967395 | 0,00465 | IDUA    | iduronidase, alpha-L-                                                  |
| 0,892546971 | 0,44602 | 0,826450318 | 0,00841 | IER3IP1 | immediate early response 3 interacting protein 1                       |
| 1,261377409 | 0,10076 | 1,215036792 | 0,0023  | IFFO1   | intermediate filament family orphan 1                                  |
| 0,813379198 | 0,12342 | 0,836826243 | 0,02124 | IFI16   | interferon, gamma-inducible protein 16                                 |
| 0,759435845 | 0,06771 | 0,838568184 | 0,03072 | IFI16   | interferon, gamma-inducible protein 16                                 |
| 1,286989247 | 0,14247 | 1,474269217 | 0,00016 | IFI35   | interferon-induced protein 35                                          |
| 0,778085177 | 0,19076 | 0,740719899 | 0,00589 | IFIH1   | interferon induced with helicase C domain 1                            |
| 0,96996191  | 0,91271 | 1,325007017 | 0,00129 | IFITM1  | interferon induced transmembrane protein 1 (9-27)                      |
| 0,996540263 | 0,97816 | 1,217566019 | 0,00114 | IFITM10 | interferon induced transmembrane protein 10                            |
| 1,112650121 | 0,67277 | 1,469168633 | 0,00003 | IFITM2  | interferon induced transmembrane protein 2 (1-8D)                      |
| 0,966606097 | 0,89309 | 1,268391399 | 0,00331 | IFITM3  | interferon induced transmembrane protein 3                             |
| 1,115739322 | 0,31785 | 1,25962998  | 0,00437 | IFLTD1  | intermediate filament tail domain containing 1                         |
| 1,182631    | 0,14985 | 1,135242102 | 0,03501 | IFNA10  | interferon, alpha 10                                                   |
| 1,234562607 | 0,06016 | 1,224336392 | 0,0018  | IFNA17  | interferon, alpha 17                                                   |
| 1,037419937 | 0,71172 | 1,133669413 | 0,04177 | IFNA21  | interferon, alpha 21                                                   |
| 1,068065408 | 0,47444 | 1,135242102 | 0,04361 | IFNA4   | interferon, alpha 4                                                    |
| 1,090507733 | 0,22441 | 1,231144413 | 0,0012  | IFNA7   | interferon, alpha 7                                                    |
| 1,134455485 | 0,30253 | 1,229438867 | 0,00544 | IFNAR1  | interferon (alpha, beta and omega) receptor 1                          |
| 0,868140228 | 0,2099  | 0,877821798 | 0,04947 | IFNE    | interferon, epsilon                                                    |
| 0,902500727 | 0,7565  | 0,692554734 | 0,00035 | IFNGR1  | interferon gamma receptor 1                                            |
| 0,674551267 | 0,14571 | 0,729004689 | 0,00031 | IFRD1   | interferon-related developmental regulator 1                           |
| 1,118061851 | 0,32172 | 1,20664392  | 0,03521 | IFT122  | intraflagellar transport 122 homolog (Chlamydomonas)                   |
| 0,877213549 | 0,40696 | 1,144724161 | 0,02774 | IFT122  | intraflagellar transport 122 homolog (Chlamydomonas)                   |
| 1,292352831 | 0,0536  | 1,204137381 | 0,00039 | IFT172  | intraflagellar transport 172 homolog (Chlamydomonas)                   |
| 1,077733145 | 0,48623 | 1,116512962 | 0,04038 | IFT20   | intraflagellar transport 20 homolog (Chlamydomonas)                    |
| 1,25962998  | 0,22429 | 1,351910833 | 0,00041 | IFT27   | intraflagellar transport 27 homolog (Chlamydomonas)                    |
| 1           | 0,99971 | 1,23370717  | 0,00189 | IFT27   | intraflagellar transport 27 homolog (Chlamydomonas)                    |
| 1,250062303 | 0,22988 | 0,854409741 | 0,02951 | IFT57   | intraflagellar transport 57 homolog (Chlamydomonas)                    |
| 0,859756486 | 0,42737 | 0,691116103 | 0,00018 | IFT74   | intraflagellar transport 74 homolog (Chlamydomonas)                    |
| 0,926588062 | 0,4148  | 0,86934456  | 0,0018  | IFT74   | intraflagellar transport 74 homolog (Chlamydomonas)                    |
| 0,859756486 | 0,15572 | 0,886381699 | 0,03933 | IFT88   | intraflagellar transport 88 homolog (Chlamydomonas)                    |
| 1,049716684 | 0,59968 | 1,132098902 | 0,02447 | IGDCC3  | immunoglobulin superfamily, DCC subclass, member 3                     |
| 1,748357241 | 0,09816 | 1,591072968 | 0,00507 | IGDCC4  | immunoglobulin superfamily, DCC subclass, member 4                     |
| 1,368883813 | 0,07959 | 1,284315809 | 0,03655 | IGF1    | insulin-like growth factor 1 (somatomedin C)                           |
| 0,807760778 | 0,22418 | 0,65747138  | 0,00005 | IGF1R   | insulin-like growth factor 1 receptor                                  |
| 0,734584317 | 0,32919 | 0,602068691 | 0,00005 | IGF1R   | insulin-like growth factor 1 receptor                                  |
| 1,117287138 | 0,16514 | 1,094293701 | 0,04518 | IGF1R   | insulin-like growth factor 1 receptor                                  |
| 1,044635763 | 0,62994 | 1,136029265 | 0,02556 | IGF2BP2 | insulin-like growth factor 2 mRNA binding protein 2                    |
| 1,047536127 | 0,51493 | 1,143930973 | 0,0015  | IGF2BP3 | insulin-like growth factor 2 mRNA binding protein 3                    |
| 0,839731493 | 0,26448 | 0,671286251 | 0,01185 | IGF2BP3 | insulin-like growth factor 2 mRNA binding protein 3                    |
| 0,703684188 | 0,27339 | 0,829894586 | 0,01181 | IGF2R   | insulin-like growth factor 2 receptor                                  |
| 1,318593614 | 0,4376  | 1,950710923 | 0,00128 | IGFBP4  | insulin-like growth factor binding protein 4                           |
| 1,035264924 | 0,88795 | 1,536875181 | 0,00291 | IGFBP5  | insulin-like growth factor binding protein 5                           |
| 1,056285625 | 0,79744 | 1,71356391  | 0,00025 | IGFBP5  | insulin-like growth factor binding protein 5                           |
| 1,046810282 | 0,59023 | 1,231144413 | 0,00355 | IGFBP7  | insulin-like growth factor binding protein 7                           |
| 0,679714121 | 0,0505  | 0,664342907 | 0,0201  | IGFL1   | IGF-like family member 1                                               |
| 1,128964405 | 0,28867 | 1,348167732 | 0,00189 | IGH@    | immunoglobulin heavy locus                                             |
| 1,084477409 | 0,32808 | 1,164733586 | 0,02952 | IGHA1   | immunoglobulin heavy constant alpha 1                                  |
| 1,134455485 | 0,40245 | 1,223488041 | 0,01364 | IGHG    | immunoglobulin heavy constant epsilon                                  |
| 2,687006851 | 0,05724 | 4,095387602 | 0,00006 | IGHG1   | immunoglobulin heavy constant gamma 1 (G1m marker)                     |
| 1,090507733 | 0,34644 | 0,898755127 | 0,03004 | IGHMBP2 | immunoglobulin mu binding protein 2                                    |

|             |         |             |         |             |                                                                                                  |
|-------------|---------|-------------|---------|-------------|--------------------------------------------------------------------------------------------------|
| 1,185914499 | 0,17143 | 1,270150983 | 0,00053 | IGHMBP2     | immunoglobulin mu binding protein 2                                                              |
| 1,092777739 | 0,23375 | 1,137605228 | 0,03336 | IGHV3OR16-1 | immunoglobulin heavy variable 3/OR16-13 (non-functional)                                         |
| 1,059952783 | 0,34098 | 1,071030823 | 0,03367 | IGHV5-78    | immunoglobulin heavy variable 5-78 (pseudogene)                                                  |
| 1,053361036 | 0,88486 | 2,046274939 | 0,00006 | IGKC        | immunoglobulin kappa constant                                                                    |
| 1,423063461 | 0,07016 | 1,541142217 | 0,00399 | IGLJ3       | immunoglobulin lambda joining 3                                                                  |
| 1,171210181 | 0,05793 | 1,137605228 | 0,01247 | IGLL1       | immunoglobulin lambda-like polypeptide 1                                                         |
| 1,358486285 | 0,11216 | 1,529436278 | 0,00091 | IGLV4-3     | immunoglobulin lambda variable 4-3                                                               |
| 1,204972315 | 0,09674 | 1,095811766 | 0,04936 | IGSF11      | immunoglobulin superfamily, member 11                                                            |
| 1,123499903 | 0,22427 | 1,132883885 | 0,02593 | IGSF22      | immunoglobulin superfamily, member 22                                                            |
| 1,022428531 | 0,85424 | 1,246601194 | 0,00115 | IGSF3       | immunoglobulin superfamily, member 3                                                             |
| 1,098092814 | 0,22506 | 1,150291893 | 0,00613 | IGSF5       | immunoglobulin superfamily, member 5                                                             |
| 0,724471077 | 0,05396 | 0,870550563 | 0,00984 | IKBKAP      | inhibitor of kappa light polypeptide gene enhancer in B-cells, kinase complex-associated protein |
| 0,777546036 | 0,0969  | 0,867538687 | 0,00854 | IKKB        | inhibitor of kappa light polypeptide gene enhancer in B-cells, kinase beta                       |
| 1,118061851 | 0,30775 | 1,170398641 | 0,00889 | IKKBG       | inhibitor of kappa light polypeptide gene enhancer in B-cells, kinase gamma                      |
| 1,145517898 | 0,11865 | 1,139973273 | 0,03348 | IKZF1       | IKAROS family zinc finger 1 (Ikaros)                                                             |
| 1,099616149 | 0,29352 | 1,215879283 | 0,00842 | IKZF4       | IKAROS family zinc finger 4 (Eos)                                                                |
| 0,906890329 | 0,69964 | 0,78024548  | 0,01496 | IKZF5       | IKAROS family zinc finger 5 (Pegasus)                                                            |
| 0,93751096  | 0,44036 | 1,185914499 | 0,01621 | IL11        | interleukin 11                                                                                   |
| 1,348167732 | 0,05195 | 1,184271612 | 0,00782 | IL17RA      | interleukin 17 receptor A                                                                        |
| 1,076240125 | 0,47082 | 1,154285418 | 0,02428 | IL17RA      | interleukin 17 receptor A                                                                        |
| 1,244011653 | 0,13011 | 1,194163187 | 0,01034 | IL17RB      | interleukin 17 receptor B                                                                        |
| 0,651573575 | 0,14421 | 0,66158572  | 0,00002 | IL17RD      | interleukin 17 receptor D                                                                        |
| 0,895025071 | 0,49306 | 0,807201075 | 0,0128  | IL1RAP      | interleukin 1 receptor accessory protein                                                         |
| 1,180174343 | 0,08551 | 1,167158102 | 0,01675 | IL1RAPL2    | interleukin 1 receptor accessory protein-like 2                                                  |
| 0,855595026 | 0,50594 | 1,134455485 | 0,04224 | IL1RN       | interleukin 1 receptor antagonist                                                                |
| 0,717972255 | 0,14208 | 0,662044455 | 0,00056 | IL20RA      | interleukin 20 receptor, alpha                                                                   |
| 1,021012126 | 0,81966 | 1,097331938 | 0,01126 | IL23A       | interleukin 23, alpha subunit p19                                                                |
| 0,980099415 | 0,85537 | 1,133669413 | 0,00537 | IL25        | interleukin 25                                                                                   |
| 1,0181852   | 0,7907  | 1,21167266  | 0,00368 | IL27        | interleukin 27                                                                                   |
| 1,157490217 | 0,09745 | 1,289668251 | 0,00091 | IL27RA      | interleukin 27 receptor, alpha                                                                   |
| 1,033830736 | 0,76285 | 1,193335743 | 0,01036 | IL28RA      | interleukin 28 receptor, alpha (interferon, lambda receptor)                                     |
| 1,28788163  | 0,27411 | 1,623379162 | 0,00049 | IL32        | interleukin 32                                                                                   |
| 1,068805991 | 0,53995 | 1,244874235 | 0,00043 | IL37        | interleukin 37                                                                                   |
| 1,142346247 | 0,29143 | 1,20163605  | 0,01738 | IL5RA       | interleukin 5 receptor, alpha                                                                    |
| 0,925946023 | 0,75319 | 0,665264521 | 0,00088 | IL7         | interleukin 7                                                                                    |
| 1,634670657 | 0,05074 | 1,397646972 | 0,01986 | IL7R        | interleukin 7 receptor                                                                           |
| 1,617762697 | 0,06506 | 1,684125907 | 0,00451 | IL7R        | interleukin 7 receptor                                                                           |
| 0,651122095 | 0,10279 | 0,826450318 | 0,02665 | ILF3        | interleukin enhancer binding factor 3, 90kDa                                                     |
| 0,958599438 | 0,82195 | 0,820741609 | 0,01012 | ILF3        | interleukin enhancer binding factor 3, 90kDa                                                     |
| 0,930449658 | 0,72337 | 1,16634937  | 0,03444 | ILK         | integrin-linked kinase                                                                           |
| 0,915733686 | 0,54929 | 0,816786991 | 0,04753 | IMMP1L      | IMP1 inner mitochondrial membrane peptidase-like (S. cerevisiae)                                 |
| 0,940174203 | 0,71302 | 0,811689581 | 0,03965 | IMMP2L      | IMP2 inner mitochondrial membrane peptidase-like (S. cerevisiae)                                 |
| 0,859160755 | 0,47992 | 0,807201075 | 0,01015 | IMPACT      | Impact homolog (mouse)                                                                           |
| 0,980779004 | 0,84779 | 1,125058485 | 0,01791 | IMPDH1      | IMP (inosine 5'-monophosphate) dehydrogenase 1                                                   |
| 0,958599438 | 0,6393  | 1,128182137 | 0,00766 | IMPDH2      | IMP (inosine 5'-monophosphate) dehydrogenase 2                                                   |
| 0,589678296 | 0,06406 | 0,677362489 | 0,00003 | INADL       | InaD-like (Drosophila)                                                                           |
| 1,060687741 | 0,77646 | 0,765778999 | 0,00422 | ING3        | inhibitor of growth family, member 3                                                             |
| 0,752101876 | 0,09575 | 0,60332196  | 0,00002 | ING5        | inhibitor of growth family, member 5                                                             |
| 1,32408891  | 0,12621 | 1,461044379 | 0,03859 | INHBA       | inhibin, beta A                                                                                  |
| 1,163926534 | 0,06316 | 1,135242102 | 0,04821 | INHBC       | inhibin, beta C                                                                                  |
| 1,248330549 | 0,07929 | 1,184271612 | 0,02389 | INHBE       | inhibin, beta E                                                                                  |
| 1,027401439 | 0,9367  | 0,668963777 | 0,00274 | INO80D      | INO80 complex subunit D                                                                          |
| 1,040300267 | 0,5876  | 1,157490217 | 0,01522 | INPP4A      | inositol polyphosphate-4-phosphatase, type I, 107kDa                                             |
| 1,216722359 | 0,06499 | 1,120389214 | 0,04557 | INPP4A      | inositol polyphosphate-4-phosphatase, type I, 107kDa                                             |
| 1,311302014 | 0,11974 | 0,819604608 | 0,01279 | INPP4B      | inositol polyphosphate-4-phosphatase, type II, 105kDa                                            |
| 0,857376037 | 0,27543 | 0,865136691 | 0,00483 | INPP5A      | inositol polyphosphate-5-phosphatase, 80kDa                                                      |
| 1,100378609 | 0,43999 | 1,173648178 | 0,01129 | INPPL1      | inositol polyphosphate phosphatase-like 1                                                        |
| 1,172022284 | 0,19943 | 1,241427492 | 0,00375 | INSL3       | insulin-like 3 (Leydig cell)                                                                     |
| 1,142346247 | 0,20174 | 1,138394029 | 0,04822 | INSM2       | insulinoma-associated 2                                                                          |
| 1,195819797 | 0,05556 | 1,240567298 | 0,00389 | INSR        | insulin receptor                                                                                 |
| 0,765248385 | 0,06468 | 0,885153765 | 0,03343 | INTS10      | integrator complex subunit 10                                                                    |
| 0,822450069 | 0,47409 | 0,790589117 | 0,03323 | INTS2       | integrator complex subunit 2                                                                     |
| 0,827023368 | 0,38135 | 0,771640088 | 0,00274 | INTS6       | integrator complex subunit 6                                                                     |
| 0,755236293 | 0,11085 | 0,665264521 | 0,00001 | INTS6       | integrator complex subunit 6                                                                     |
| 0,846745312 | 0,29237 | 0,842062954 | 0,00501 | INTS6       | integrator complex subunit 6                                                                     |
| 0,824733549 | 0,10358 | 0,760489377 | 0,00196 | INTS7       | integrator complex subunit 7                                                                     |
| 0,803293997 | 0,24792 | 0,592135806 | 0       | INTS7       | integrator complex subunit 7                                                                     |
| 0,918276162 | 0,45867 | 0,847332435 | 0,00409 | IP6K2       | inositol hexakisphosphate kinase 2                                                               |
| 1,057750964 | 0,3682  | 1,092777739 | 0,03326 | IP6K3       | inositol hexakisphosphate kinase 3                                                               |
| 1,07549439  | 0,6076  | 0,845572287 | 0,01223 | IPMK        | inositol polyphosphate multikinase                                                               |
| 1,047536127 | 0,5915  | 1,128964405 | 0,0337  | IPO11       | importin 11                                                                                      |
| 0,90312651  | 0,62074 | 0,7944344   | 0,0435  | IPO11       | importin 11                                                                                      |
| 0,942131274 | 0,54936 | 0,763129604 | 0,00004 | IPO5        | importin 5                                                                                       |
| 0,927230546 | 0,68147 | 0,672683604 | 0,00645 | IPO5        | importin 5                                                                                       |
| 0,782954296 | 0,05751 | 0,847332435 | 0,005   | IPO5        | importin 5                                                                                       |
| 0,78132788  | 0,10138 | 0,784584098 | 0,00155 | IPO7        | importin 7                                                                                       |
| 0,860949188 | 0,43614 | 0,847919965 | 0,00282 | IPO7        | importin 7                                                                                       |
| 0,864537231 | 0,49927 | 0,852634892 | 0,01201 | IPO7        | importin 7                                                                                       |
| 0,812252396 | 0,07768 | 0,859756486 | 0,00564 | IPO9        | importin 9                                                                                       |
| 0,756283999 | 0,12324 | 0,840313752 | 0,03826 | IPP         | intracisternal A particle-promoted polypeptide                                                   |
| 0,952637998 | 0,52584 | 0,827023368 | 0,00664 | IQCA1       | IQ motif containing with AAA domain 1                                                            |
| 1,197478705 | 0,06741 | 1,100378609 | 0,03783 | IQCH        | IQ motif containing H                                                                            |
| 1,016070143 | 0,89272 | 0,883927531 | 0,00482 | IQCK        | IQ motif containing K                                                                            |
| 0,985549337 | 0,82171 | 0,887611337 | 0,01449 | IQCK        | IQ motif containing K                                                                            |
| 0,755236293 | 0,15209 | 0,760489377 | 0,00446 | IQGAP1      | IQ motif containing GTPase activating protein 1                                                  |
| 0,623732786 | 0,19041 | 0,765248385 | 0,0152  | IQGAP1      | IQ motif containing GTPase activating protein 1                                                  |
| 1,274560627 | 0,12678 | 1,186736798 | 0,0012  | IQSEC1      | IQ motif and Sec7 domain 1                                                                       |
| 1,194991205 | 0,11827 | 1,200803427 | 0,00283 | IQSEC3      | IQ motif and Sec7 domain 3                                                                       |
| 1,164733586 | 0,13162 | 1,109569472 | 0,04249 | IQSEC3      | IQ motif and Sec7 domain 3                                                                       |
| 0,70759708  | 0,10543 | 0,700763725 | 0,00069 | IREB2       | iron-responsive element binding protein 2                                                        |
| 0,759435845 | 0,24788 | 0,726986259 | 0,0117  | IREB2       | iron-responsive element binding protein 2                                                        |
| 0,712025098 | 0,24489 | 0,595841287 | 0,00015 | IREB2       | iron-responsive element binding protein 2                                                        |
| 1,525201653 | 0,06969 | 1,337000495 | 0,00027 | IRF1        | interferon regulatory factor 1                                                                   |
| 0,864537231 | 0,37564 | 0,804408371 | 0,00401 | IRF2BP2     | interferon regulatory factor 2 binding protein 2                                                 |
| 0,883927531 | 0,23111 | 0,806641759 | 0,00447 | IRF2BP2     | interferon regulatory factor 2 binding protein 2                                                 |
| 0,733566672 | 0,05183 | 0,745355193 | 0,00195 | IRF2BP2     | interferon regulatory factor 2 binding protein 2                                                 |
| 1,090507733 | 0,33609 | 1,117287138 | 0,04649 | IRF2BP2     | interferon regulatory factor 2 binding protein 2                                                 |
| 0,997231251 | 0,98849 | 1,289668251 | 0,00281 | IRF3        | interferon regulatory factor 3                                                                   |
| 1,092777739 | 0,41392 | 1,229438867 | 0,00031 | IRF5        | interferon regulatory factor 5                                                                   |
| 1,163926534 | 0,26268 | 1,244011653 | 0,00293 | IRF5        | interferon regulatory factor 5                                                                   |
| 1,188383105 | 0,11359 | 1,159899655 | 0,02033 | IRG1        | immunoresponsive 1 homolog (mouse)                                                               |
| 0,947370071 | 0,73902 | 0,811127156 | 0,00225 | IRS2        | insulin receptor substrate 2                                                                     |
| 0,812252396 | 0,2603  | 0,818469182 | 0,00488 | IRS2        | insulin receptor substrate 2                                                                     |
| 0,717972255 | 0,05528 | 0,687770909 | 0,00037 | IRX4        | iroquois homeobox 4                                                                              |

|             |         |             |         |          |                                                                                      |
|-------------|---------|-------------|---------|----------|--------------------------------------------------------------------------------------|
| 0,817902059 | 0,09818 | 0,787853886 | 0,00148 | ISCA1    | iron-sulfur cluster assembly 1 homolog ( <i>S. cerevisiae</i> )                      |
| 0,748461493 | 0,17315 | 0,695923196 | 0,00052 | ISCA1    | iron-sulfur cluster assembly 1 homolog ( <i>S. cerevisiae</i> )                      |
| 0,783497187 | 0,43926 | 0,840313752 | 0,01829 | ISG20L2  | interferon stimulated exonuclease gene 20kDa-like 2                                  |
| 1,033830736 | 0,7044  | 1,149494848 | 0,00368 | ISG20L2  | interferon stimulated exonuclease gene 20kDa-like 2                                  |
| 0,811689581 | 0,42315 | 0,552865327 | 0,00174 | ISL1     | ISL LIM homeobox 1                                                                   |
| 1,250062303 | 0,1559  | 1,365093718 | 0,00407 | ISLR     | immunoglobulin superfamily containing leucine-rich repeat                            |
| 0,686342216 | 0,05413 | 0,656105627 | 0,00003 | ISOC1    | isochorismatase domain containing 1                                                  |
| 1,060687741 | 0,62489 | 0,877821798 | 0,01447 | ISY1     | ISY1 splicing factor homolog ( <i>S. cerevisiae</i> )                                |
| 1,330529041 | 0,09571 | 1,455989549 | 0,00016 | ISYNA1   | inositol-3-phosphate synthase 1                                                      |
| 1,001387256 | 0,9961  | 0,724973416 | 0,02411 | ITCH     | itchy E3 ubiquitin protein ligase homolog (mouse)                                    |
| 1,081474763 | 0,68797 | 0,873572896 | 0,04139 | ITFG1    | integrin alpha FG-GAP repeat containing 1                                            |
| 0,945402117 | 0,54551 | 0,90312651  | 0,03925 | ITFG1    | integrin alpha FG-GAP repeat containing 1                                            |
| 0,943438251 | 0,67761 | 1,22010051  | 0,00083 | ITFG2    | integrin alpha FG-GAP repeat containing 2                                            |
| 1,035264924 | 0,7023  | 1,232852325 | 0,00097 | ITGA11   | integrin, alpha 11                                                                   |
| 1,106497353 | 0,48858 | 1,354724977 | 0,00355 | ITGA11   | integrin, alpha 11                                                                   |
| 1,034547582 | 0,85875 | 1,498999602 | 0,00302 | ITGA7    | integrin, alpha 7                                                                    |
| 0,949342121 | 0,80956 | 1,118061851 | 0,04382 | ITGA8    | integrin, alpha 8                                                                    |
| 1,168777249 | 0,07294 | 1,118061851 | 0,02587 | ITGA9    | integrin, alpha 9                                                                    |
| 0,944747041 | 0,72131 | 1,21167266  | 0,03043 | ITGA9    | integrin, alpha 9                                                                    |
| 1,135242102 | 0,11738 | 1,129747215 | 0,0152  | ITGAD    | integrin, alpha D                                                                    |
| 0,748461493 | 0,06468 | 0,833353207 | 0,00281 | ITGB1BP1 | integrin beta 1 binding protein 1                                                    |
| 0,96727633  | 0,78851 | 0,835666959 | 0,00179 | ITGB1BP1 | integrin beta 1 binding protein 1                                                    |
| 1,040300267 | 0,56889 | 1,132098902 | 0,01987 | ITGB1BP2 | integrin beta 1 binding protein (melusin) 2                                          |
| 1,072516617 | 0,49536 | 1,117287138 | 0,03886 | ITGB3    | integrin, beta 3 (platelet glycoprotein IIIa, antigen CD61)                          |
| 1,00486382  | 0,94551 | 1,143930973 | 0,03761 | ITGB3    | integrin, beta 3 (platelet glycoprotein IIIa, antigen CD61)                          |
| 1,152686347 | 0,24924 | 1,234562607 | 0,01525 | ITGB4    | integrin, beta 4                                                                     |
| 0,985549337 | 0,88114 | 0,777546036 | 0,00971 | ITGB5    | integrin, beta 5                                                                     |
| 0,723969086 | 0,22375 | 0,778624691 | 0,017   | ITGB8    | integrin, beta 8                                                                     |
| 0,789493887 | 0,15251 | 0,737645729 | 0,01443 | ITGB8    | integrin, beta 8                                                                     |
| 0,690158677 | 0,05033 | 0,794985251 | 0,04244 | ITGBL1   | integrin, beta-like 1 (with EGF-like repeat domains)                                 |
| 1,184271612 | 0,06932 | 1,187559666 | 0,0118  | ITIH2    | inter-alpha (globulin) inhibitor H2                                                  |
| 1,121943481 | 0,29224 | 1,21167266  | 0,01245 | ITIH4    | inter-alpha (globulin) inhibitor H4 (plasma Kallikrein-sensitive glycoprotein)       |
| 1,168777249 | 0,34581 | 1,2135356   | 0,04163 | ITIH5    | inter-alpha (globulin) inhibitor H5                                                  |
| 0,87175824  | 0,10993 | 0,870550563 | 0,03253 | ITM2B    | integral membrane protein 2B                                                         |
| 0,685391402 | 0,13279 | 0,660211421 | 0,00114 | ITPR2    | inositol 1,4,5-trisphosphate receptor, type 2                                        |
| 0,603740296 | 0,07886 | 0,722966147 | 0,00433 | ITPR2    | inositol 1,4,5-trisphosphate receptor, type 2                                        |
| 0,711531731 | 0,25448 | 0,748461493 | 0,02666 | ITPRIPL2 | inositol 1,4,5-trisphosphate receptor interacting protein-like 2                     |
| 0,76950361  | 0,13259 | 0,789493887 | 0,00594 | ITPRIPL2 | inositol 1,4,5-trisphosphate receptor interacting protein-like 2                     |
| 1,100378609 | 0,30096 | 1,111879158 | 0,0177  | ITSN1    | intersectin 1 (SH3 domain protein)                                                   |
| 0,833931044 | 0,34062 | 0,809442217 | 0,01473 | ITSN2    | intersectin 2                                                                        |
| 1,153485605 | 0,16331 | 1,165541198 | 0,00562 | ITSN2    | intersectin 2                                                                        |
| 1,072516617 | 0,66485 | 1,105730653 | 0,04478 | IVD      | isovaleryl-CoA dehydrogenase                                                         |
| 1,07549439  | 0,41051 | 1,300440147 | 0,00268 | IVD      | isovaleryl-CoA dehydrogenase                                                         |
| 0,953298545 | 0,73695 | 0,791137301 | 0,00539 | IVNS1ABP | influenza virus NS1A binding protein                                                 |
| 0,778085177 | 0,17227 | 0,891928519 | 0,02613 | IWS1     | IWS1 homolog ( <i>S. cerevisiae</i> )                                                |
| 1,038139271 | 0,70256 | 0,852634892 | 0,02692 | IYD      | iodotyrosine deiodinase                                                              |
| 1,077733145 | 0,27869 | 1,132098902 | 0,01652 | IZUMO4   | IZUMO family member 4                                                                |
| 0,789493887 | 0,16453 | 0,836826243 | 0,01363 | JAG1     | jagged 1                                                                             |
| 0,838568184 | 0,33292 | 0,815072332 | 0,01978 | JAK2     | Janus kinase 2                                                                       |
| 0,882702996 | 0,28915 | 0,784040454 | 0,0489  | JAK2     | Janus kinase 2                                                                       |
| 1,07997656  | 0,46859 | 1,105730653 | 0,02984 | JAK3     | Janus kinase 3                                                                       |
| 1,271031689 | 0,13455 | 1,43893358  | 0,00911 | JAM2     | junctional adhesion molecule 2                                                       |
| 1,038139271 | 0,78545 | 1,312211255 | 0,02307 | JAM3     | junctional adhesion molecule 3                                                       |
| 0,979420298 | 0,83974 | 1,151089491 | 0,02757 | JAM3     | junctional adhesion molecule 3                                                       |
| 0,951318276 | 0,58712 | 1,21167266  | 0,03472 | JAM3     | junctional adhesion molecule 3                                                       |
| 0,706127202 | 0,06733 | 0,798298386 | 0,01921 | JHDM1D   | jumonji C domain containing histone demethylase 1 homolog D ( <i>S. cerevisiae</i> ) |
| 1,156688184 | 0,54048 | 0,709561678 | 0,00626 | JHDM1D   | jumonji C domain containing histone demethylase 1 homolog D ( <i>S. cerevisiae</i> ) |
| 1,043911927 | 0,86353 | 0,827023368 | 0,00485 | JKAMP    | JNK1/MAPK8-associated membrane protein                                               |
| 0,882702996 | 0,56054 | 0,71400199  | 0,00768 | JMJD1C   | jumonji domain containing 1C                                                         |
| 0,760489377 | 0,407   | 0,812252396 | 0,00087 | JMJD1C   | jumonji domain containing 1C                                                         |
| 1,138394029 | 0,28723 | 1,184271612 | 0,01187 | JMJD4    | jumonji domain containing 4                                                          |
| 1,052631155 | 0,617   | 1,229438867 | 0,00268 | JMJD4    | jumonji domain containing 4                                                          |
| 1,207480591 | 0,10159 | 1,204137381 | 0,00007 | JMJD5    | jumonji domain containing 5                                                          |
| 1,016774673 | 0,92824 | 1,229438867 | 0,00887 | JMJD6    | jumonji domain containing 6                                                          |
| 0,780786493 | 0,09408 | 0,85027416  | 0,03651 | JMJD7    | jumonji domain containing 7                                                          |
| 0,705637922 | 0,11225 | 0,738669032 | 0,01059 | JMY      | junction mediating and regulatory protein, p53 cofactor                              |
| 1,006257823 | 0,9426  | 1,153485605 | 0,00791 | JPH1     | junctophilin 1                                                                       |
| 0,774855931 | 0,42844 | 0,704660378 | 0,00521 | JPH1     | junctophilin 1                                                                       |
| 1,179356592 | 0,2051  | 1,221793102 | 0,00332 | JPH2     | junctophilin 2                                                                       |
| 1,059218335 | 0,48999 | 1,112650121 | 0,02039 | JPH3     | junctophilin 3                                                                       |
| 0,655651007 | 0,05712 | 0,765248385 | 0,00424 | JPX      | JPX transcript, XIST activator (non-protein coding)                                  |
| 0,852634892 | 0,12879 | 0,853226098 | 0,00284 | JPX      | JPX transcript, XIST activator (non-protein coding)                                  |
| 1,110338834 | 0,19639 | 1,106497353 | 0,03003 | JTB      | jumping translocation breakpoint                                                     |
| 0,684441907 | 0,05696 | 0,756283999 | 0,00058 | JUB      | jub, ajuba homolog ( <i>Xenopus laevis</i> )                                         |
| 1,199139914 | 0,05569 | 1,186736798 | 0,00135 | KANK1    | KN motif and ankyrin repeat domains 1                                                |
| 1,008352455 | 0,9662  | 0,668500248 | 0,00005 | KANK1    | KN motif and ankyrin repeat domains 1                                                |
| 0,938221197 | 0,55453 | 0,879649076 | 0,02207 | KANK1    | KN motif and ankyrin repeat domains 1                                                |
| 1,159899655 | 0,17913 | 1,169587664 | 0,01061 | KANK2    | KN motif and ankyrin repeat domains 2                                                |
| 1,240567298 | 0,09406 | 1,279872414 | 0,01206 | KANK2    | KN motif and ankyrin repeat domains 2                                                |
| 0,700763725 | 0,05061 | 0,673150035 | 0,00001 | KARS     | lysyl-tRNA synthetase                                                                |
| 0,643940815 | 0,07943 | 0,652477474 | 0,00513 | KAT2B    | K(lysine) acetyltransferase 2B                                                       |
| 1,102669163 | 0,2848  | 1,193335743 | 0,00593 | KAZALD1  | Kazal-type serine peptidase inhibitor domain 1                                       |
| 0,880869374 | 0,06125 | 0,860352631 | 0,01558 | KAZALD1  | Kazal-type serine peptidase inhibitor domain 1                                       |
| 0,823020345 | 0,09441 | 0,757333158 | 0,0012  | KAZN     | kazrin, periplakin interacting protein                                               |
| 0,855595026 | 0,22151 | 0,752101876 | 0,00227 | KBTBD6   | kelch repeat and BTB (POZ) domain containing 6                                       |
| 0,885153765 | 0,54796 | 0,840313752 | 0,01678 | KBTBD6   | kelch repeat and BTB (POZ) domain containing 6                                       |
| 0,934327347 | 0,75619 | 0,79940583  | 0,01414 | KBTBD7   | kelch repeat and BTB (POZ) domain containing 7                                       |
| 0,708578698 | 0,09968 | 0,733566672 | 0,00012 | KCMF1    | potassium channel modulatory factor 1                                                |
| 0,815072332 | 0,38402 | 0,66158572  | 0,00002 | KCMF1    | potassium channel modulatory factor 1                                                |
| 1,243149669 | 0,07738 | 1,114193651 | 0,02331 | KCNA2    | potassium voltage-gated channel, shaker-related subfamily, member 2                  |
| 1,079228237 | 0,51483 | 1,218410264 | 0,01262 | KCNA6    | potassium voltage-gated channel, shaker-related subfamily, member 6                  |
| 1,011853201 | 0,85661 | 1,136029265 | 0,03817 | KCNAB1   | potassium voltage-gated channel, shaker-related subfamily, beta member 1             |
| 1,121166078 | 0,20682 | 1,280759861 | 0,00045 | KCNAB2   | potassium voltage-gated channel, shaker-related subfamily, beta member 2             |
| 1,150291893 | 0,10506 | 1,141554707 | 0,01882 | KCNB1    | potassium voltage-gated channel, Shab-related subfamily, member 1                    |
| 1,167158102 | 0,24637 | 1,159899655 | 0,00926 | KCNB1    | potassium voltage-gated channel, Shab-related subfamily, member 1                    |
| 1,150291893 | 0,18285 | 1,150291893 | 0,03443 | KCNB2    | potassium voltage-gated channel, Shab-related subfamily, member 2                    |
| 1,161508732 | 0,22508 | 1,145517898 | 0,01596 | KCNB4    | potassium voltage-gated channel, Shaw-related subfamily, member 4                    |
| 0,760489377 | 0,06551 | 0,70222438  | 0,00149 | KCND3    | potassium voltage-gated channel, Shal-related subfamily, member 3                    |
| 1,052631155 | 0,52483 | 1,118837101 | 0,01413 | KCNE2    | potassium voltage-gated channel, Isk-related family, member 2                        |
| 1,200803427 | 0,12205 | 1,190856849 | 0,0116  | KCNE4    | potassium voltage-gated channel, Isk-related family, member 4                        |
| 1,124278924 | 0,27528 | 1,223488041 | 0,00036 | KCNIP2   | Kv channel interacting protein 2                                                     |
| 1,178539408 | 0,19424 | 1,28877463  | 0,00654 | KCNIP3   | Kv channel interacting protein 3, calsenilin                                         |
| 1,194991205 | 0,14685 | 1,271031689 | 0,00293 | KCNIP3   | Kv channel interacting protein 3, calsenilin                                         |
| 1,107264584 | 0,30474 | 1,161508732 | 0,01042 | KCNJ10   | potassium inwardly-rectifying channel, subfamily J, member 10                        |



|             |         |             |         |          |                                                                                           |
|-------------|---------|-------------|---------|----------|-------------------------------------------------------------------------------------------|
| 0,802737389 | 0,2316  | 0,750019495 | 0,002   | KCNJ15   | potassium inwardly-rectifying channel, subfamily J, member 15                             |
| 0,885153765 | 0,1646  | 0,85086373  | 0,00977 | KCNJ15   | potassium inwardly-rectifying channel, subfamily J, member 15                             |
| 0,898132373 | 0,6582  | 0,806082831 | 0,02813 | KCNJ2    | potassium inwardly-rectifying channel, subfamily J, member 2                              |
| 0,666187413 | 0,17222 | 0,659296807 | 0,02571 | KCNJ2    | potassium inwardly-rectifying channel, subfamily J, member 2                              |
| 1,002081605 | 0,98973 | 1,132098902 | 0,00705 | KCNJ3    | potassium inwardly-rectifying channel, subfamily J, member 3                              |
| 1,139973273 | 0,29572 | 1,445932295 | 0       | KCNJ5    | potassium inwardly-rectifying channel, subfamily J, member 5                              |
| 1,061423209 | 0,41603 | 1,098092814 | 0,02919 | KCNJ9    | potassium inwardly-rectifying channel, subfamily J, member 9                              |
| 0,774855931 | 0,26648 | 0,668500248 | 0,00003 | KCNK1    | potassium channel, subfamily K, member 1                                                  |
| 0,934975198 | 0,44881 | 1,147107024 | 0,00833 | KCNK16   | potassium channel, subfamily K, member 16                                                 |
| 1,270150983 | 0,06871 | 1,198309021 | 0,0121  | KCNK17   | potassium channel, subfamily K, member 17                                                 |
| 1,17772279  | 0,09731 | 1,262252032 | 0,01577 | KCNK3    | potassium channel, subfamily K, member 3                                                  |
| 1,022428531 | 0,8235  | 1,121166078 | 0,04925 | KCNK3    | potassium channel, subfamily K, member 3                                                  |
| 1,115739322 | 0,14998 | 1,10343374  | 0,02506 | KCNK9    | potassium channel, subfamily K, member 9                                                  |
| 1,221793102 | 0,13556 | 1,215879283 | 0,0072  | KCNMA1   | potassium large conductance calcium-activated channel, subfamily M, alpha member 1        |
| 1,146312186 | 0,15681 | 1,172022284 | 0,00174 | KCNMB2   | potassium large conductance calcium-activated channel, subfamily M, beta member 2         |
| 1,207480591 | 0,10344 | 1,124278924 | 0,03111 | KCNMB4   | potassium large conductance calcium-activated channel, subfamily M, beta member 4         |
| 1,089752112 | 0,37716 | 1,244011653 | 0,00369 | KCNN1    | potassium intermediate/small conductance calcium-activated channel, subfamily N, member 1 |
| 1,285206337 | 0,14198 | 1,142346247 | 0,02016 | KCNN2    | potassium intermediate/small conductance calcium-activated channel, subfamily N, member 2 |
| 1,085981856 | 0,41164 | 1,178539408 | 0,00429 | KCNN3    | potassium intermediate/small conductance calcium-activated channel, subfamily N, member 3 |
| 1,304050735 | 0,05939 | 1,441928871 | 0,00006 | KCNN4    | potassium intermediate/small conductance calcium-activated channel, subfamily N, member 4 |
| 1,009051634 | 0,9221  | 1,146312186 | 0,04309 | KCNQ1    | potassium voltage-gated channel, KQT-like subfamily, member 1                             |
| 1,17609125  | 0,09049 | 1,135242102 | 0,03211 | KCNQ3    | potassium voltage-gated channel, KQT-like subfamily, member 3                             |
| 1,130530567 | 0,29628 | 1,335148303 | 0,00013 | KCN51    | potassium voltage-gated channel, delayed-rectifier, subfamily S, member 1                 |
| 1,043188594 | 0,56777 | 1,121166078 | 0,03536 | KCN52    | potassium voltage-gated channel, delayed-rectifier, subfamily S, member 2                 |
| 1,187559666 | 0,2119  | 1,236275261 | 0,01909 | KCP      | kielin/chordin-like protein                                                               |
| 0,883315051 | 0,3104  | 0,892546971 | 0,01054 | KCTD10   | potassium channel tetramerisation domain containing 10                                    |
| 0,79940583  | 0,15864 | 0,778085177 | 0,01811 | KCTD15   | potassium channel tetramerisation domain containing 15                                    |
| 0,843815796 | 0,4302  | 0,777546036 | 0,01272 | KCTD18   | potassium channel tetramerisation domain containing 18                                    |
| 0,44844408  | 0,11675 | 0,642157904 | 0,00008 | KCTD20   | potassium channel tetramerisation domain containing 20                                    |
| 0,774855931 | 0,12537 | 0,796088099 | 0,00168 | KCTD20   | potassium channel tetramerisation domain containing 20                                    |
| 0,802181166 | 0,17765 | 0,876605721 | 0,02821 | KCTD21   | potassium channel tetramerisation domain containing 21                                    |
| 0,982820599 | 0,86007 | 0,863339559 | 0,03001 | KCTD4    | potassium channel tetramerisation domain containing 4                                     |
| 0,752623374 | 0,17123 | 0,811127156 | 0,01265 | KCTD6    | potassium channel tetramerisation domain containing 6                                     |
| 1,081474763 | 0,33886 | 1,125838586 | 0,00867 | KCTD7    | potassium channel tetramerisation domain containing 7                                     |
| 0,908778116 | 0,49311 | 0,849096246 | 0,01466 | KDEL2    | KDEL (Lys-Asp-Glu-Leu) containing 2                                                       |
| 1,333298677 | 0,05433 | 1,256142381 | 0,00687 | KDEL1    | KDEL (Lys-Asp-Glu-Leu) endoplasmic reticulum protein retention receptor 1                 |
| 1,236275261 | 0,55784 | 1,283425898 | 0,01584 | KDELR1   | KDEL (Lys-Asp-Glu-Leu) endoplasmic reticulum protein retention receptor 1                 |
| 1,106497353 | 0,41125 | 1,164733586 | 0,02739 | KDEL2    | KDEL (Lys-Asp-Glu-Leu) endoplasmic reticulum protein retention receptor 2                 |
| 0,967947027 | 0,87178 | 0,863938187 | 0,02462 | KDM1B    | lysine (K)-specific demethylase 1B                                                        |
| 0,662044455 | 0,22874 | 0,679714121 | 0,00045 | KDM1B    | lysine (K)-specific demethylase 1B                                                        |
| 0,833353207 | 0,24335 | 0,832775771 | 0,0032  | KDM2A    | lysine (K)-specific demethylase 2A                                                        |
| 0,740206649 | 0,08249 | 0,757333158 | 0,00048 | KDM2B    | lysine (K)-specific demethylase 2B                                                        |
| 1,095052471 | 0,62151 | 0,812252396 | 0,01825 | KDM4B    | lysine (K)-specific demethylase 4B                                                        |
| 1,00486382  | 0,97745 | 1,205807828 | 0,01603 | KDM4B    | lysine (K)-specific demethylase 4B                                                        |
| 0,982139595 | 0,93718 | 0,750019495 | 0,0016  | KDM4C    | lysine (K)-specific demethylase 4C                                                        |
| 0,822450069 | 0,10773 | 0,828744904 | 0,00328 | KDM5A    | lysine (K)-specific demethylase 5A                                                        |
| 0,80408371  | 0,06876 | 0,759435845 | 0,00062 | KDM5A    | lysine (K)-specific demethylase 5A                                                        |
| 1,116512962 | 0,45561 | 0,812815602 | 0,01175 | KDM5C    | lysine (K)-specific demethylase 5C                                                        |
| 1,05553718  | 0,72654 | 1,17609125  | 0,01909 | KDM5D    | lysine (K)-specific demethylase 5D                                                        |
| 0,734075318 | 0,30405 | 0,716480825 | 0,00042 | KDM6A    | lysine (K)-specific demethylase 6A                                                        |
| 0,784040454 | 0,11655 | 0,736623843 | 0,0079  | KDM6A    | lysine (K)-specific demethylase 6A                                                        |
| 0,626766651 | 0,13236 | 0,700763725 | 0,00101 | KDSR     | 3-ketodihydroshingosine reductase                                                         |
| 1,059952783 | 0,60178 | 1,189207115 | 0,01185 | KHSRP    | KH-type splicing regulatory protein                                                       |
| 1,156688184 | 0,27669 | 1,31494276  | 0,03203 | KHSRP    | KH-type splicing regulatory protein                                                       |
| 0,963261894 | 0,75859 | 0,892546971 | 0,04358 | KIAA0090 | KIAA0090                                                                                  |
| 0,987600861 | 0,91861 | 0,86934456  | 0,0391  | KIAA0146 | KIAA0146                                                                                  |
| 0,756283999 | 0,23707 | 0,842062954 | 0,02315 | KIAA0182 | KIAA0182                                                                                  |
| 1,152686347 | 0,26486 | 1,225185332 | 0,00444 | KIAA0195 | KIAA0195                                                                                  |
| 0,795536484 | 0,13356 | 0,84323111  | 0,02527 | KIAA0196 | KIAA0196                                                                                  |
| 1,05553718  | 0,63599 | 1,180174343 | 0,02146 | KIAA0226 | KIAA0226                                                                                  |
| 0,878430468 | 0,49527 | 0,670356296 | 0,00032 | KIAA0232 | KIAA0232                                                                                  |
| 0,819036698 | 0,05049 | 0,774319028 | 0,00337 | KIAA0368 | KIAA0368                                                                                  |
| 0,786217292 | 0,24916 | 0,648419777 | 0,00075 | KIAA0368 | KIAA0368                                                                                  |
| 0,86154616  | 0,26281 | 0,888226796 | 0,01651 | KIAA0391 | KIAA0391                                                                                  |
| 1,135242102 | 0,2233  | 1,275444392 | 0,00495 | KIAA0430 | KIAA0430                                                                                  |
| 0,796640096 | 0,07561 | 0,891928519 | 0,02186 | KIAA0494 | KIAA0494                                                                                  |
| 1,183451022 | 0,15873 | 1,22603486  | 0,00109 | KIAA0509 | hypothetical LOC57242                                                                     |
| 1,114966219 | 0,29261 | 1,147902414 | 0,02585 | KIAA0513 | KIAA0513                                                                                  |
| 1,087488391 | 0,41881 | 1,153485605 | 0,04102 | KIAA0513 | KIAA0513                                                                                  |
| 0,808881348 | 0,31759 | 0,803293997 | 0,015   | KIAA0528 | KIAA0528                                                                                  |
| 1,01395948  | 0,92247 | 1,191682575 | 0,00266 | KIAA0649 | KIAA0649                                                                                  |
| 1,210833084 | 0,09458 | 1,203303026 | 0,00162 | KIAA0748 | KIAA0748                                                                                  |
| 1,104964485 | 0,23922 | 1,094293701 | 0,02447 | KIAA0754 | KIAA0754                                                                                  |
| 0,982820599 | 0,88018 | 0,856781955 | 0,02137 | KIAA0889 | KIAA0889                                                                                  |
| 0,681129017 | 0,20667 | 0,635515845 | 0,00004 | KIAA0907 | KIAA0907                                                                                  |
| 0,922103118 | 0,34711 | 0,874784765 | 0,03346 | KIAA0922 | KIAA0922                                                                                  |
| 1,047536127 | 0,80746 | 1,124278924 | 0,04101 | KIAA0930 | KIAA0930                                                                                  |
| 0,926588062 | 0,68718 | 0,791137301 | 0,00302 | KIAA0947 | KIAA0947                                                                                  |
| 0,929804943 | 0,30548 | 0,840313752 | 0,0018  | KIAA1009 | KIAA1009                                                                                  |
| 1,080725402 | 0,53812 | 1,124278924 | 0,04251 | KIAA1009 | KIAA1009                                                                                  |
| 0,865136691 | 0,68184 | 0,782411782 | 0,00215 | KIAA1033 | KIAA1033                                                                                  |
| 0,624165274 | 0,27717 | 0,719965659 | 0,03372 | KIAA1033 | KIAA1033                                                                                  |
| 1,172022284 | 0,29571 | 1,151089491 | 0,01084 | KIAA1107 | KIAA1107                                                                                  |
| 0,768970416 | 0,21674 | 0,786762445 | 0,01866 | KIAA1109 | KIAA1109                                                                                  |
| 0,716480825 | 0,05455 | 0,743806881 | 0,0001  | KIAA1143 | KIAA1143                                                                                  |
| 0,987600861 | 0,89017 | 0,855595026 | 0,00039 | KIAA1143 | KIAA1143                                                                                  |
| 0,752101876 | 0,07598 | 0,703684188 | 0,00015 | KIAA1147 | KIAA1147                                                                                  |
| 1,392811481 | 0,0577  | 1,165541198 | 0,00902 | KIAA1211 | KIAA1211                                                                                  |
| 1,219255094 | 0,09661 | 1,158292806 | 0,01465 | KIAA1211 | KIAA1211                                                                                  |
| 0,828170661 | 0,26955 | 0,818469182 | 0,00037 | KIAA1217 | KIAA1217                                                                                  |
| 1,167158102 | 0,14257 | 1,185092771 | 0,00606 | KIAA1244 | KIAA1244                                                                                  |
| 1,003471749 | 0,98929 | 0,639936207 | 0,00001 | KIAA1267 | KIAA1267                                                                                  |
| 0,79774524  | 0,13589 | 0,860949188 | 0,02413 | KIAA1279 | KIAA1279                                                                                  |
| 0,951977908 | 0,64054 | 0,894404902 | 0,01947 | KIAA1310 | KIAA1310                                                                                  |
| 1,027401439 | 0,79496 | 1,143138335 | 0,02237 | KIAA1310 | KIAA1310                                                                                  |
| 1,168777249 | 0,20409 | 1,187559666 | 0,00185 | KIAA1324 | KIAA1324                                                                                  |
| 0,72597914  | 0,113   | 0,906261938 | 0,02385 | KIAA1429 | KIAA1429                                                                                  |
| 0,840896415 | 0,46778 | 0,807201075 | 0,00174 | KIAA1430 | KIAA1430                                                                                  |
| 0,976031761 | 0,8256  | 0,786762445 | 0,00077 | KIAA1430 | KIAA1430                                                                                  |
| 0,777546036 | 0,12688 | 0,76101669  | 0,00102 | KIAA1432 | KIAA1432                                                                                  |
| 0,995159722 | 0,95323 | 1,085229372 | 0,02705 | KIAA1456 | KIAA1456                                                                                  |
| 1,301341855 | 0,11253 | 1,246601194 | 0,03017 | KIAA1462 | KIAA1462                                                                                  |
| 1,470187336 | 0,06402 | 1,186736798 | 0,02071 | KIAA1462 | KIAA1462                                                                                  |
| 1,003471749 | 0,97892 | 1,142346247 | 0,01091 | KIAA1467 | KIAA1467                                                                                  |

|             |         |             |         |           |                                                                                   |
|-------------|---------|-------------|---------|-----------|-----------------------------------------------------------------------------------|
| 0,802181166 | 0,08107 | 0,798851916 | 0,00282 | KIAA1609  | KIAA1609                                                                          |
| 0,960594864 | 0,62221 | 1,144724161 | 0,00846 | KIAA1609  | KIAA1609                                                                          |
| 0,821880187 | 0,35659 | 0,722465199 | 0,00066 | KIAA1609  | KIAA1609                                                                          |
| 0,925304428 | 0,58086 | 0,886381699 | 0,04954 | KIAA1609  | KIAA1609                                                                          |
| 0,828744904 | 0,18663 | 0,756283999 | 0,00373 | KIAA1609  | KIAA1609                                                                          |
| 1,155886707 | 0,42499 | 1,224336392 | 0,0007  | KIAA1644  | KIAA1644                                                                          |
| 1,231998073 | 0,2363  | 1,180174343 | 0,03616 | KIAA1652  | KIAA1652 protein                                                                  |
| 1,163926534 | 0,11236 | 1,151887642 | 0,01467 | KIAA1656  | KIAA1656 protein                                                                  |
| 0,77271055  | 0,07453 | 0,744838732 | 0,00039 | KIAA1704  | KIAA1704                                                                          |
| 0,935623498 | 0,76204 | 0,745872013 | 0,00138 | KIAA1704  | KIAA1704                                                                          |
| 0,848507902 | 0,23931 | 0,86934456  | 0,04509 | KIAA1704  | KIAA1704                                                                          |
| 0,862741345 | 0,52046 | 0,806082831 | 0,04931 | KIAA1704  | KIAA1704                                                                          |
| 0,685866644 | 0,05708 | 0,699792933 | 0,00001 | KIAA1715  | KIAA1715                                                                          |
| 0,89688816  | 0,44612 | 0,800514811 | 0,00178 | KIAA1731  | KIAA1731                                                                          |
| 0,824733549 | 0,11309 | 0,817902059 | 0,00252 | KIAA1731  | KIAA1731                                                                          |
| 1,134455485 | 0,25718 | 1,223488041 | 0,0168  | KIAA1755  | KIAA1755                                                                          |
| 0,729510172 | 0,0929  | 0,758909626 | 0,00009 | KIAA1804  | mixed lineage kinase 4                                                            |
| 0,738157203 | 0,09794 | 0,819036698 | 0,00547 | KIAA1841  | KIAA1841                                                                          |
| 1,047536127 | 0,57569 | 1,232852325 | 0,00105 | KIAA1908  | hypothetical LOC114796                                                            |
| 0,929160674 | 0,56292 | 0,784584098 | 0,00423 | KIAA1958  | KIAA1958                                                                          |
| 1,035982764 | 0,69808 | 1,129747215 | 0,01438 | KIAA2018  | KIAA2018                                                                          |
| 0,821310701 | 0,4002  | 0,632878297 | 0,00074 | KIAA2018  | KIAA2018                                                                          |
| 1,264003098 | 0,3801  | 0,786762445 | 0,03452 | KIAA2022  | KIAA2022                                                                          |
| 0,714992493 | 0,17867 | 0,740719899 | 0,00009 | KIAA2026  | KIAA2026                                                                          |
| 0,747942879 | 0,13695 | 0,790589117 | 0,01009 | KIDINS220 | kinase D-interacting substrate, 220kDa                                            |
| 0,675487042 | 0,09891 | 0,722465199 | 0,01269 | KIF11     | kinesin family member 11                                                          |
| 0,777546036 | 0,29457 | 0,744322628 | 0,00148 | KIF13A    | kinesin family member 13A                                                         |
| 0,755759964 | 0,07003 | 0,734584317 | 0,00002 | KIF13A    | kinesin family member 13A                                                         |
| 0,813943185 | 0,27601 | 0,898132373 | 0,04121 | KIF13B    | kinesin family member 13B                                                         |
| 0,899378312 | 0,65166 | 0,823020345 | 0,02281 | KIF16B    | kinesin family member 16B                                                         |
| 1,169587664 | 0,05659 | 1,186736798 | 0,00283 | KIF17     | kinesin family member 17                                                          |
| 1,055553718 | 0,67774 | 0,887611337 | 0,01418 | KIF18A    | kinesin family member 18A                                                         |
| 0,805524291 | 0,21861 | 0,815637493 | 0,0026  | KIF1B     | kinesin family member 1B                                                          |
| 0,580351957 | 0,07291 | 0,558256481 | 0,00019 | KIF21A    | kinesin family member 21A                                                         |
| 0,770571108 | 0,05431 | 0,809442217 | 0,00706 | KIF23     | kinesin family member 23                                                          |
| 0,767905135 | 0,1161  | 0,84323111  | 0,00823 | KIF23     | kinesin family member 23                                                          |
| 1,466116757 | 0,05257 | 1,279872414 | 0,00708 | KIF26A    | kinesin family member 26A                                                         |
| 0,734584317 | 0,3473  | 0,767905135 | 0,00002 | KIF5B     | kinesin family member 5B                                                          |
| 0,767905135 | 0,15581 | 0,702222438 | 0,00023 | KIF5B     | kinesin family member 5B                                                          |
| 1,107264584 | 0,13718 | 1,190031696 | 0,01372 | KIF6      | kinesin family member 6                                                           |
| 1,078480432 | 0,30999 | 1,142346247 | 0,03781 | KIF6      | kinesin family member 6                                                           |
| 1,064370182 | 0,53097 | 1,215036792 | 0,00942 | KIF9      | kinesin family member 9                                                           |
| 0,868140228 | 0,28007 | 0,746389192 | 0,00001 | KIF9      | kinesin family member 9                                                           |
| 0,752623374 | 0,27526 | 0,724973416 | 0,00094 | KIN       | KIN, antigenic determinant of recA protein homolog (mouse)                        |
| 1,112650121 | 0,58202 | 0,800514811 | 0,04372 | KIN       | KIN, antigenic determinant of recA protein homolog (mouse)                        |
| 1,074004472 | 0,37271 | 1,187595666 | 0,00111 | KIR2DL1   | killer cell immunoglobulin-like receptor, two domains, long cytoplasmic tail, 1   |
| 1,039579435 | 0,68551 | 1,20664392  | 0,01291 | KIR2DL2   | killer cell immunoglobulin-like receptor, two domains, long cytoplasmic tail, 2   |
| 1,210833084 | 0,18763 | 1,174461971 | 0,01211 | KIR2DL4   | killer cell immunoglobulin-like receptor, two domains, long cytoplasmic tail, 4   |
| 1,167158102 | 0,12385 | 1,095052471 | 0,04192 | KIR2DL4   | killer cell immunoglobulin-like receptor, two domains, long cytoplasmic tail, 4   |
| 1,120389214 | 0,29256 | 1,23370717  | 0,00109 | KIR2DS1   | killer cell immunoglobulin-like receptor, two domains, short cytoplasmic tail, 1  |
| 1,104198847 | 0,28287 | 1,306765254 | 0,00066 | KIR2DS2   | killer cell immunoglobulin-like receptor, two domains, short cytoplasmic tail, 2  |
| 1,136816973 | 0,2361  | 1,172834949 | 0,03162 | KIR2DS3   | killer cell immunoglobulin-like receptor, two domains, short cytoplasmic tail, 3  |
| 1,25092908  | 0,05307 | 1,207480591 | 0,00171 | KIR2DS5   | killer cell immunoglobulin-like receptor, two domains, short cytoplasmic tail, 5  |
| 1,083725967 | 0,24351 | 1,202469249 | 0,00109 | KIR3DL1   | killer cell immunoglobulin-like receptor, three domains, long cytoplasmic tail, 1 |
| 1,151089491 | 0,16334 | 1,225185332 | 0,0056  | KIR3DL3   | killer cell immunoglobulin-like receptor, three domains, long cytoplasmic tail, 3 |
| 1,240567298 | 0,15177 | 1,214194884 | 0,00527 | KIRREL    | kin of IRRE like (Drosophila)                                                     |
| 0,801625329 | 0,09892 | 0,832198735 | 0,00089 | KLC1      | kinesin light chain 1                                                             |
| 0,517991382 | 0,07134 | 0,743806881 | 0,00054 | KLC1      | kinesin light chain 1                                                             |
| 1,071773463 | 0,51837 | 1,231998073 | 0,00139 | KLC3      | kinesin light chain 3                                                             |
| 1,146312186 | 0,22444 | 1,354724977 | 0,0015  | KLC4      | kinesin light chain 4                                                             |
| 0,872362706 | 0,40611 | 0,784584098 | 0,00206 | KLF10     | Kruppel-like factor 10                                                            |
| 1,140763716 | 0,33622 | 0,837987135 | 0,00154 | KLF11     | Kruppel-like factor 11                                                            |
| 1,104198847 | 0,26293 | 1,187595666 | 0,00403 | KLF12     | Kruppel-like factor 12                                                            |
| 0,713012859 | 0,1251  | 0,718470088 | 0,00084 | KLF5      | Kruppel-like factor 5 (intestinal)                                                |
| 0,580351957 | 0,29107 | 0,779704843 | 0,00289 | KLF5      | Kruppel-like factor 5 (intestinal)                                                |
| 1,22010051  | 0,13927 | 1,251796459 | 0,00928 | KLF6      | Kruppel-like factor 6                                                             |
| 0,774855931 | 0,08776 | 0,755759964 | 0,01966 | KLF6      | Kruppel-like factor 6                                                             |
| 0,963929808 | 0,65042 | 1,210833084 | 0,03341 | KLF7      | Kruppel-like factor 7 (ubiquitous)                                                |
| 0,776468875 | 0,1034  | 0,763129604 | 0,00387 | KLHDC10   | kelch domain containing 10                                                        |
| 0,788400174 | 0,2924  | 0,862741345 | 0,00948 | KLHDC10   | kelch domain containing 10                                                        |
| 0,991716731 | 0,95215 | 0,856781955 | 0,03678 | KLHDC2    | kelch domain containing 2                                                         |
| 0,805524291 | 0,32194 | 0,846158597 | 0,02111 | KLHDC5    | kelch domain containing 5                                                         |
| 1,267512522 | 0,14999 | 1,411275843 | 0,00017 | KLHDC7B   | kelch domain containing 7B                                                        |
| 1,088997015 | 0,54736 | 1,131314463 | 0,01545 | KLHL11    | kelch-like 11 (Drosophila)                                                        |
| 0,862143545 | 0,43263 | 0,889458994 | 0,04408 | KLHL12    | kelch-like 12 (Drosophila)                                                        |
| 0,796088099 | 0,35924 | 0,731028724 | 0,00032 | KLHL13    | kelch-like 13 (Drosophila)                                                        |
| 1,375541818 | 0,10449 | 1,114966219 | 0,04246 | KLHL14    | kelch-like 14 (Drosophila)                                                        |
| 1,037419937 | 0,79384 | 1,132883885 | 0,0444  | KLHL17    | kelch-like 17 (Drosophila)                                                        |
| 0,894404902 | 0,59174 | 0,71548826  | 0,00385 | KLHL20    | kelch-like 20 (Drosophila)                                                        |
| 1,265756594 | 0,05058 | 1,325007017 | 0,00027 | KLHL22    | kelch-like 22 (Drosophila)                                                        |
| 1,035264924 | 0,81182 | 0,840313752 | 0,02593 | KLHL28    | kelch-like 28 (Drosophila)                                                        |
| 1,096571589 | 0,35693 | 1,133669413 | 0,03461 | KLHL29    | kelch-like 29 (Drosophila)                                                        |
| 1,00556058  | 0,94369 | 1,134455485 | 0,00332 | KLHL3     | kelch-like 3 (Drosophila)                                                         |
| 0,93109482  | 0,66493 | 0,816203046 | 0,00069 | KLHL5     | kelch-like 5 (Drosophila)                                                         |
| 0,718968266 | 0,05079 | 0,709070018 | 0,00763 | KLHL7     | kelch-like 7 (Drosophila)                                                         |
| 0,915733686 | 0,33773 | 0,790589117 | 0,03686 | KLHL7     | kelch-like 7 (Drosophila)                                                         |
| 0,758383773 | 0,18025 | 0,719965659 | 0,00033 | KLHL7     | kelch-like 7 (Drosophila)                                                         |
| 1,083725967 | 0,50484 | 0,872967591 | 0,04972 | KLHL8     | kelch-like 8 (Drosophila)                                                         |
| 0,984866443 | 0,93644 | 0,827023368 | 0,0033  | KLHL8     | kelch-like 8 (Drosophila)                                                         |
| 0,86934456  | 0,38338 | 0,854409741 | 0,00976 | KLHL9     | kelch-like 9 (Drosophila)                                                         |
| 1,182631    | 0,11221 | 1,150291893 | 0,0046  | KLK2      | kallikrein-related peptidase 2                                                    |
| 0,990342872 | 0,92044 | 1,190856849 | 0,00155 | KLK2      | kallikrein-related peptidase 2                                                    |
| 0,972654947 | 0,80614 | 1,141554707 | 0,04121 | KLK4      | kallikrein-related peptidase 4                                                    |
| 1,198309021 | 0,08082 | 1,168777249 | 0,03856 | KLK4      | kallikrein-related peptidase 4                                                    |
| 1,179356592 | 0,07159 | 1,220946513 | 0,02401 | KLK4      | kallikrein-related peptidase 4                                                    |
| 0,788400174 | 0,12616 | 0,840313752 | 0,0204  | KLRAQ1    | KLRAQ motif containing 1                                                          |
| 1,139183377 | 0,11329 | 1,165541198 | 0,00934 | KLRD1     | killer cell lectin-like receptor subfamily D, member 1                            |
| 0,849684999 | 0,08137 | 0,874784765 | 0,0234  | KLRG2     | killer cell lectin-like receptor subfamily G, member 2                            |
| 1,155886707 | 0,2287  | 1,207480591 | 0,02763 | KNTC1     | kinetochore associated 1                                                          |
| 0,762072415 | 0,12436 | 0,810003474 | 0,00842 | KPNA1     | karyopherin alpha 1 (importin alpha 5)                                            |
| 0,827023368 | 0,42004 | 0,772175133 | 0,00389 | KPNA1     | karyopherin alpha 1 (importin alpha 5)                                            |
| 0,816203046 | 0,21115 | 0,756808396 | 0,00866 | KPNA1     | karyopherin alpha 1 (importin alpha 5)                                            |
| 0,910669834 | 0,56337 | 0,810003474 | 0,0103  | KPNA1     | karyopherin alpha 1 (importin alpha 5)                                            |
| 0,69640574  | 0,06854 | 0,814507563 | 0,00524 | KPNA2     | karyopherin alpha 2 (RAG cohort 1, importin alpha 1)                              |

|             |         |             |         |            |                                                                 |
|-------------|---------|-------------|---------|------------|-----------------------------------------------------------------|
| 0,740206649 | 0,14203 | 0,739693755 | 0,00059 | KPNA3      | karyopherin alpha 3 (importin alpha 4)                          |
| 0,632878297 | 0,11293 | 0,677362489 | 0,00013 | KPNA3      | karyopherin alpha 3 (importin alpha 4)                          |
| 0,710546022 | 0,13185 | 0,724973416 |         | KPNA4      | karyopherin alpha 4 (importin alpha 3)                          |
| 0,717474767 | 0,08437 | 0,71400199  | 0,00008 | KPNA4      | karyopherin alpha 4 (importin alpha 3)                          |
| 0,879649076 | 0,40762 | 0,754190038 | 0,01262 | KPNA5      | karyopherin alpha 5 (importin alpha 6)                          |
| 0,689202576 | 0,07447 | 0,733566672 | 0,00007 | KPNA6      | karyopherin alpha 6 (importin alpha 7)                          |
| 0,654289036 | 0,19892 | 0,820172911 | 0,00217 | KPNB1      | karyopherin (importin) beta 1                                   |
| 0,579146403 | 0,05865 | 0,815072332 | 0,01687 | KPNB1      | karyopherin (importin) beta 1                                   |
| 0,817335328 | 0,32471 | 0,811127156 | 0,00061 | KRAS       | v-Ki-ras2 Kirsten rat sarcoma viral oncogene homolog            |
| 0,933032992 | 0,55354 | 0,792784137 | 0,00373 | KRAS       | v-Ki-ras2 Kirsten rat sarcoma viral oncogene homolog            |
| 0,96996191  | 0,93293 | 0,668500248 | 0,00002 | KRAS       | v-Ki-ras2 Kirsten rat sarcoma viral oncogene homolog            |
| 1,043188594 | 0,6607  | 1,146312186 | 0,01369 | KRBA2      | KRAB-A domain containing 2                                      |
| 0,945402117 | 0,7554  | 0,81056512  | 0,03299 | KRCC1      | lysine-rich coiled-coil 1                                       |
| 0,799960128 | 0,59304 | 0,836826243 | 0,02197 | KRCC1      | lysine-rich coiled-coil 1                                       |
| 0,819604608 | 0,33399 | 0,741233505 | 0,01681 | KRCC1      | lysine-rich coiled-coil 1                                       |
| 0,677362489 | 0,07516 | 0,69399636  |         | KREMEN1    | kringle containing transmembrane protein 1                      |
| 0,817902059 | 0,28143 | 0,812252396 | 0,00206 | KRIT1      | KRIT1, ankyrin repeat containing                                |
| 0,973329374 | 0,85209 | 0,825305409 | 0,01874 | KRIT1      | KRIT1, ankyrin repeat containing                                |
| 0,688247801 | 0,42241 | 0,810003474 | 0,0021  | KRIT1      | KRIT1, ankyrin repeat containing                                |
| 0,768437591 | 0,42907 | 0,833353207 | 0,00619 | KRR1       | KRR1, small subunit (SSU) processome component, homolog (yeast) |
| 0,55632506  | 0,10427 | 0,922103118 | 0,04683 | KRT14      | keratin 14                                                      |
| 1,889494082 | 0,22922 | 2,46741434  | 0,00001 | KRT19      | keratin 19                                                      |
| 1,048989328 | 0,49623 | 1,121943481 | 0,01899 | KRT25      | keratin 25                                                      |
| 0,895025071 | 0,08203 | 0,907519155 | 0,02143 | KRT6A      | keratin 6A                                                      |
| 0,839149637 | 0,0809  | 0,85797053  | 0,00499 | KRT6B      | keratin 6B                                                      |
| 1,191682575 | 0,16897 | 1,224336392 | 0,0004  | KRT7       | keratin 7                                                       |
| 0,942784536 | 0,81921 | 1,28788163  | 0,00023 | KRT8       | keratin 8                                                       |
| 1,099616149 | 0,28195 | 1,131314463 | 0,00972 | KRT82      | keratin 82                                                      |
| 1,212512819 | 0,08795 | 1,256142381 | 0,00682 | KRT8P12    | keratin 8 pseudogene 12                                         |
| 1,088997015 | 0,38877 | 1,208317843 | 0,00425 | KRTAP10-11 | keratin associated protein 10-11                                |
| 1,076986376 | 0,25746 | 1,072516617 | 0,0431  | KRTAP2-1   | keratin associated protein 2-1                                  |
| 1,145517898 | 0,07565 | 1,210833084 | 0,00489 | KRTAP3-1   | keratin associated protein 3-1                                  |
| 1,088997015 | 0,56396 | 1,32317144  | 0,00498 | KRTAP4-12  | keratin associated protein 4-12                                 |
| 1,004167543 | 0,96077 | 1,127400412 | 0,04947 | KRTAP4-2   | keratin associated protein 4-2                                  |
| 0,961260928 | 0,75321 | 1,139973273 | 0,03459 | KRTAP4-5   | keratin associated protein 4-5                                  |
| 1,033830736 | 0,77824 | 1,199971382 | 0,00596 | KRTAP5-8   | keratin associated protein 5-8                                  |
| 1,020304659 | 0,76618 | 1,128964405 | 0,03986 | KRTAP5-9   | keratin associated protein 5-9                                  |
| 1,04608494  | 0,66663 | 1,143138335 | 0,01784 | KRTAP7-1   | keratin associated protein 7-1 (gene/pseudogene)                |
| 1,264879542 | 0,40215 | 1,489677463 | 0,00003 | KRTCAP2    | keratinocyte associated protein 2                               |
| 0,76630998  | 0,45116 | 0,758383773 | 0,00005 | KTN1       | kinectin 1 (kinesin receptor)                                   |
| 1,108800644 | 0,51923 | 1,20664392  | 0,00192 | KY         | kyphoscoliosis peptidase                                        |
| 0,917004043 | 0,29677 | 0,838568184 | 0,00376 | L2HGDH     | L-2-hydroxyglutarate dehydrogenase                              |
| 1,0181852   | 0,88015 | 1,128182137 | 0,01534 | L3MBTL2    | l(3)mbt-like 2 (Drosophila)                                     |
| 0,957271458 | 0,71552 | 0,792234811 | 0,02257 | LACC1      | laccase (multicopper oxidoreductase) domain containing 1        |
| 0,934327347 | 0,75887 | 0,84264683  | 0,0409  | LACC1      | laccase (multicopper oxidoreductase) domain containing 1        |
| 0,777007269 | 0,17724 | 0,706616822 | 0,00165 | LACTB      | lactamase, beta                                                 |
| 0,826450318 | 0,32235 | 0,796088099 | 0,02047 | LACTB      | lactamase, beta                                                 |
| 1,00695555  | 0,97907 | 0,693034943 | 0,00329 | LACTB2     | lactamase, beta 2                                               |
| 1,04608494  | 0,8333  | 0,666187413 | 0,00027 | LACTB2     | lactamase, beta 2                                               |
| 1,065846736 | 0,53863 | 1,205807828 | 0,00683 | LAGE3      | L antigen family, member 3                                      |
| 1,337000495 | 0,05119 | 1,247465572 | 0,01369 | LAIR1      | leukocyte-associated immunoglobulin-like receptor 1             |
| 1,155085785 | 0,19938 | 1,139973273 | 0,01995 | LAMA3      | laminin, alpha 3                                                |
| 1,208317843 | 0,22436 | 1,383190629 | 0,01867 | LAMA4      | laminin, alpha 4                                                |
| 1,092777739 | 0,50663 | 1,4063932   | 0,00033 | LAMA4      | laminin, alpha 4                                                |
| 0,783497187 | 0,2819  | 1,241427492 | 0,03503 | LAMB2      | laminin, beta 2 (laminin 5)                                     |
| 0,910038824 | 0,78217 | 1,268391399 | 0,01    | LAMB3      | laminin, beta 3                                                 |
| 0,948684315 | 0,47542 | 1,200803427 | 0,00972 | LAMB4      | laminin, beta 4                                                 |
| 1,262252032 | 0,08671 | 1,425037614 | 0,00003 | LAMC1      | laminin, gamma 1 (formerly LAMB2)                               |
| 1,106497353 | 0,40052 | 1,200803427 | 0,01273 | LAMC1      | laminin, gamma 1 (formerly LAMB2)                               |
| 1,335148303 | 0,32474 | 1,469168633 | 0,00848 | LAMC2      | laminin, gamma 2                                                |
| 1,054822317 | 0,64671 | 1,121166078 | 0,04943 | LAMC3      | laminin, gamma 3                                                |
| 0,752623374 | 0,13846 | 0,802737389 | 0,00245 | LAMP2      | lysosomal-associated membrane protein 2                         |
| 0,621574834 | 0,05111 | 0,677832163 | 0,00016 | LAMP2      | lysosomal-associated membrane protein 2                         |
| 0,716977624 | 0,0657  | 0,726482525 | 0,00333 | LAMTOR3    | late endosomal/lysosomal adaptor, MAPK and MTOR activator 3     |
| 0,736113431 | 0,15106 | 0,689202576 | 0,00089 | LAMTOR3    | late endosomal/lysosomal adaptor, MAPK and MTOR activator 3     |
| 0,694477568 | 0,15797 | 0,715984371 | 0,00698 | LANCL3     | LanC lantibiotic synthetase component C-like 3 (bacterial)      |
| 1           | 0,99859 | 0,824162085 | 0,00587 | LAP3       | leucine aminopeptidase 3                                        |
| 1,251796459 | 0,48555 | 1,642621402 | 0,00015 | LAPTM5     | lysosomal protein transmembrane 5                               |
| 1,199971382 | 0,10971 | 1,221793102 | 0,00869 | LARGE      | like-glycosyltransferase                                        |
| 1,361314116 | 0,07013 | 1,131314463 | 0,01558 | LARP1B     | La ribonucleoprotein domain family, member 1B                   |
| 0,780786493 | 0,13745 | 0,846745312 | 0,01549 | LARP4B     | La ribonucleoprotein domain family, member 4B                   |
| 0,665264521 | 0,06939 | 0,682073917 | 0,0044  | LARP4B     | La ribonucleoprotein domain family, member 4B                   |
| 0,764718139 | 0,1876  | 0,743291492 | 0,01172 | LARP4B     | La ribonucleoprotein domain family, member 4B                   |
| 1,194163187 | 0,20448 | 1,185092771 | 0,00134 | LASP1      | LIM and SH3 protein 1                                           |
| 0,91383145  | 0,28604 | 0,893165852 | 0,04444 | LATS1      | LATS, large tumor suppressor, homolog 1 (Drosophila)            |
| 1,208317843 | 0,4956  | 0,854409741 | 0,0139  | LATS2      | LATS, large tumor suppressor, homolog 2 (Drosophila)            |
| 1,00765376  | 0,95148 | 1,121166078 | 0,02427 | LBX1       | ladybird homeobox 1                                             |
| 1,178539408 | 0,36431 | 1,139183377 | 0,04099 | LCE1E      | late cornified envelope 1E                                      |
| 0,727994774 | 0,14547 | 0,770571108 | 0,00179 | LCLAT1     | lysocardiolipin acyltransferase 1                               |
| 1,032398535 | 0,69179 | 1,159899655 | 0,03251 | LCN15      | lipocalin 15                                                    |
| 0,974679631 | 0,89111 | 0,819604608 | 0,04775 | LCOR       | ligand dependent nuclear receptor corepressor                   |
| 0,891310496 | 0,61281 | 0,729510172 | 0,0002  | LCORL      | ligand dependent nuclear receptor corepressor-like              |
| 1,312211255 | 0,44024 | 0,744838732 | 0,00312 | LCORL      | ligand dependent nuclear receptor corepressor-like              |
| 1,477338064 | 0,11197 | 1,563739286 | 0,00047 | LCP1       | lymphocyte cytosolic protein 1 (L-plastin)                      |
| 1,56049096  | 0,08404 | 1,41519416  | 0,00113 | LDB2       | LIM domain binding 2                                            |
| 1,140763716 | 0,06554 | 1,199971382 | 0,0017  | LDB2       | LIM domain binding 2                                            |
| 1,251796459 | 0,13757 | 1,180174343 | 0,0114  | LDHAL6B    | lactate dehydrogenase A-like 6B                                 |
| 0,716480825 | 0,05471 | 0,78024548  | 0,0352  | LDLR       | low density lipoprotein receptor                                |
| 0,79940583  | 0,09658 | 0,664803554 | 0,00178 | LDLR       | low density lipoprotein receptor                                |
| 0,768437591 | 0,10256 | 0,745872013 | 0,0169  | LDLR       | low density lipoprotein receptor                                |
| 0,936272247 | 0,67457 | 0,813379198 | 0,00907 | LDLRAD3    | low density lipoprotein receptor class A domain containing 3    |
| 0,959929261 | 0,78824 | 1,160703914 | 0,01525 | LDLRAP1    | low density lipoprotein receptor adaptor protein 1              |
| 0,829894586 | 0,13235 | 0,838568184 | 0,03634 | LDOC1      | leucine zipper, down-regulated in cancer 1                      |
| 1,155085785 | 0,06996 | 1,114966219 | 0,04556 | LEF1       | lymphoid enhancer-binding factor 1                              |
| 1,071030823 | 0,31618 | 1,121943481 | 0,03719 | LEKR1      | leucine, glutamate and lysine rich 1                            |
| 1,039579435 | 0,83063 | 0,845572287 | 0,01341 | LEMD3      | LEM domain containing 3                                         |
| 1,285206337 | 0,18826 | 1,370782805 | 0,02302 | LEPR       | leptin receptor                                                 |
| 1,400556321 | 0,06023 | 1,427014506 | 0,03027 | LEPR       | leptin receptor                                                 |
| 0,901250463 | 0,58711 | 0,822450069 | 0,00009 | LEPROT     | leptin receptor overlapping transcript                          |
| 0,862143545 | 0,14014 | 0,849684999 | 0,02024 | LETM1      | leucine zipper-EF-hand containing transmembrane protein 1       |
| 1,153485605 | 0,09529 | 1,079228237 | 0,0337  | LETM2      | leucine zipper-EF-hand containing transmembrane protein 2       |
| 1,02313747  | 0,8335  | 1,199971382 | 0,00161 | LETMD1     | LETM1 domain containing 1                                       |
| 0,831622098 | 0,59165 | 1,578987773 | 0,00093 | LGALS1     | lectin, galactoside-binding, soluble, 1                         |
| 1,164733586 | 0,0713  | 1,204972315 | 0,00103 | LGALS12    | lectin, galactoside-binding, soluble, 12                        |

|             |         |             |         |             |                                                                                          |
|-------------|---------|-------------|---------|-------------|------------------------------------------------------------------------------------------|
| 1,01773463  | 0,37378 | 1,121166078 | 0,02358 | LGALS14     | lectin, galactoside-binding, soluble, 14                                                 |
| 1,134455485 | 0,30446 | 1,32592576  | 0,01449 | LGALS2      | lectin, galactoside-binding, soluble, 2                                                  |
| 1,175276328 | 0,24568 | 1,238848698 | 0,00345 | LGALS3      | lectin, galactoside-binding, soluble, 3                                                  |
| 0,633317127 | 0,07406 | 0,771640088 | 0,00012 | LGALS8      | lectin, galactoside-binding, soluble, 8                                                  |
| 1,179356592 | 0,0558  | 1,236275261 | 0,01875 | LGI4        | leucine-rich repeat LGI family, member 4                                                 |
| 1,241427492 | 0,05198 | 1,484523571 | 0,00018 | LGI4        | leucine-rich repeat LGI family, member 4                                                 |
| 1,095811766 | 0,4088  | 1,157490217 | 0,03806 | LGR4        | leucine-rich repeat containing G protein-coupled receptor 4                              |
| 0,982820599 | 0,85683 | 1,155886707 | 0,02832 | LGR5        | leucine-rich repeat containing G protein-coupled receptor 5                              |
| 1,080725402 | 0,58189 | 1,172022284 | 0,04064 | LHFPL2      | lipoma HMGIC fusion partner-like 2                                                       |
| 1,057750964 | 0,68513 | 1,178539408 | 0,01    | LHX2        | LIM homeobox 2                                                                           |
| 0,860352631 | 0,25707 | 0,804966138 | 0,02701 | LIG4        | ligase IV, DNA, ATP-dependent                                                            |
| 1,092020546 | 0,36281 | 1,30224419  | 0,00084 | LILRA2      | leukocyte immunoglobulin-like receptor, subfamily A (with TM domain), member 2           |
| 1,193335743 | 0,2171  | 1,316766922 | 0,00003 | LILRA2      | leukocyte immunoglobulin-like receptor, subfamily A (with TM domain), member 2           |
| 0,984866443 | 0,86821 | 1,185092771 | 0,01124 | LILRA5      | leukocyte immunoglobulin-like receptor, subfamily A (with TM domain), member 5           |
| 1,110338834 | 0,46032 | 1,140763716 | 0,04073 | LILRA6      | leukocyte immunoglobulin-like receptor, subfamily A (with TM domain), member 6           |
| 1,231144413 | 0,10598 | 1,340712592 | 0,00021 | LILRB1      | leukocyte immunoglobulin-like receptor, subfamily B (with TM and ITIM domains), member 1 |
| 1,356604327 | 0,06906 | 1,309485423 | 0,00008 | LILRB3      | leukocyte immunoglobulin-like receptor, subfamily B (with TM and ITIM domains), member 3 |
| 0,753667455 | 0,17585 | 0,649319301 | 0,00279 | LIMCH1      | LIM and calponin homology domains 1                                                      |
| 0,684441907 | 0,19544 | 0,76684133  | 0,00306 | LIMCH1      | LIM and calponin homology domains 1                                                      |
| 0,625031151 | 0,14463 | 0,636397468 | 0,0001  | LIMCH1      | LIM and calponin homology domains 1                                                      |
| 1,078480432 | 0,4663  | 1,175276328 | 0,00199 | LIMD1       | LIM domains containing 1                                                                 |
| 1,270150983 | 0,05897 | 1,273677475 | 0,02141 | LIMD2       | LIM domain containing 2                                                                  |
| 1,230291345 | 0,23812 | 1,485552921 | 0,00012 | LIME1       | Lck interacting transmembrane adaptor 1                                                  |
| 1,125838586 | 0,28992 | 1,125838586 | 0,02503 | LIMK1       | LIM domain kinase 1                                                                      |
| 0,96727633  | 0,78929 | 0,812815602 | 0,02395 | LIMS1       | LIM and senescent cell antigen-like domains 1                                            |
| 0,871154192 | 0,5787  | 0,732042848 | 0,00452 | LIMS1       | LIM and senescent cell antigen-like domains 1                                            |
| 0,857376037 | 0,33691 | 0,808320869 | 0,0006  | LIMS1       | LIM and senescent cell antigen-like domains 1                                            |
| 1,244011653 | 0,05829 | 1,319507911 | 0,01273 | LIMS2       | LIM and senescent cell antigen-like domains 2                                            |
| 1,106497353 | 0,57007 | 0,86154616  | 0,00354 | LINS4       | lin-54 homolog (C. elegans)                                                              |
| 0,69839266  | 0,08624 | 0,801069878 | 0,00272 | LIN7C       | lin-7 homolog C (C. elegans)                                                             |
| 1,116512962 | 0,47456 | 1,216722359 | 0,03266 | LINC00032   | long intergenic non-protein coding RNA 32                                                |
| 1,125058485 | 0,32469 | 1,180992661 | 0,00578 | LINC00085   | long intergenic non-protein coding RNA 85                                                |
| 1,093535457 | 0,46804 | 1,157490217 | 0,0017  | LINC00085   | long intergenic non-protein coding RNA 85                                                |
| 0,934327347 | 0,59307 | 0,865736566 | 0,01597 | LINC00115   | long intergenic non-protein coding RNA 115                                               |
| 1,091263877 | 0,23531 | 1,118837101 | 0,04452 | LINC00163   | long intergenic non-protein coding RNA 163                                               |
| 1,237990291 | 0,0571  | 1,185914499 | 0,0103  | LINC00165   | long intergenic non-protein coding RNA 165                                               |
| 1,110338834 | 0,4571  | 1,193335743 | 0,01867 | LINC00176   | long intergenic non-protein coding RNA 176                                               |
| 1,019597683 | 0,90958 | 0,886996305 | 0,04622 | LINC00230A  | long intergenic non-protein coding RNA 230A                                              |
| 1,095052471 | 0,24067 | 1,195819797 | 0,00044 | LINC00293   | long intergenic non-protein coding RNA 293                                               |
| 0,89688816  | 0,28212 | 0,864537231 | 0,04696 | LINC00304   | long intergenic non-protein coding RNA 304                                               |
| 0,966606097 | 0,75296 | 1,101905116 | 0,02543 | LINC00311   | long intergenic non-protein coding RNA 311                                               |
| 1,128182137 | 0,18642 | 1,227735684 | 0,00077 | LINC00326   | long intergenic non-protein coding RNA 326                                               |
| 1,205807828 | 0,25127 | 1,143138335 | 0,03387 | LINC00339   | long intergenic non-protein coding RNA 339                                               |
| 1,347233577 | 0,0765  | 1,371733289 | 0,006   | LINC00341   | long intergenic non-protein coding RNA 341                                               |
| 0,949342121 | 0,76875 | 1,21335356  | 0,04308 | LINC00342   | long intergenic non-protein coding RNA 342                                               |
| 1,085981856 | 0,25686 | 1,132098902 | 0,00881 | LINC00427   | long intergenic non-protein coding RNA 427                                               |
| 1,202469249 | 0,18523 | 1,23370717  | 0,00109 | LINC00460   | long intergenic non-protein coding RNA 460                                               |
| 1,04608494  | 0,5893  | 0,886996305 | 0,04921 | LINC00461   | long intergenic non-protein coding RNA 461                                               |
| 0,963929808 | 0,61826 | 0,906261938 | 0,01915 | LINC00466   | long intergenic non-protein coding RNA 466                                               |
| 1,112650121 | 0,25088 | 1,123499903 | 0,0429  | LINC00470   | long intergenic non-protein coding RNA 470                                               |
| 1,098854218 | 0,18953 | 1,113421618 | 0,04233 | LINC00476   | long intergenic non-protein coding RNA 476                                               |
| 0,655196702 | 0,13713 | 0,668963777 | 0,0346  | LINC00478   | long intergenic non-protein coding RNA 478                                               |
| 1,182631    | 0,19574 | 1,143138335 | 0,0113  | LINC00479   | long intergenic non-protein coding RNA 479                                               |
| 1,090507733 | 0,32527 | 1,142346247 | 0,01703 | LINGO3      | leucine rich repeat and Ig domain containing 3                                           |
| 1,009751298 | 0,97884 | 0,672683604 | 0,00014 | LINS        | lines homolog (Drosophila)                                                               |
| 0,921464186 | 0,79981 | 0,728499557 | 0,00254 | LINS        | lines homolog (Drosophila)                                                               |
| 1,001387256 | 0,9907  | 1,139183377 | 0,00968 | LIPA        | lipase A, lysosomal acid, cholesterol esterase                                           |
| 0,713507253 | 0,15428 | 0,612592666 | 0,00596 | LIPG        | lipase, endothelial                                                                      |
| 1,196648963 | 0,20636 | 1,180992661 | 0,01319 | LITAF       | lipopolysaccharide-induced TNF factor                                                    |
| 1,249196126 | 0,11196 | 1,250062303 | 0,03385 | LLGL1       | lethal giant larvae homolog 1 (Drosophila)                                               |
| 0,743291492 | 0,17279 | 0,720464874 | 0,00129 | LLPH        | LFP homolog, long-term synaptic facilitation (Aplysia)                                   |
| 1,092020546 | 0,70839 | 0,844986384 | 0,03835 | LMBRD1      | LMBRD1 domain containing 1                                                               |
| 1,2397077   | 0,055   | 1,182631    | 0,00483 | LMCD1       | LIM and cysteine-rich domains 1                                                          |
| 1,119612889 | 0,24392 | 1,122721422 | 0,0133  | LMF1        | lipase maturation factor 1                                                               |
| 1,143930973 | 0,346   | 1,23370717  | 0,0163  | LMF1        | lipase maturation factor 1                                                               |
| 1,275444392 | 0,1782  | 1,333298677 | 0,00875 | LMF1        | lipase maturation factor 1                                                               |
| 1,090507733 | 0,42217 | 0,815072332 | 0,00129 | LMF1        | lipase maturation factor 1                                                               |
| 1,245737416 | 0,18325 | 1,277213759 | 0,00376 | LMF1        | lipase maturation factor 1                                                               |
| 1,068065408 | 0,69178 | 1,209994089 | 0,02372 | LMF2        | lipase maturation factor 2                                                               |
| 1,021720083 | 0,85699 | 1,184271612 | 0,01608 | LMF2        | lipase maturation factor 2                                                               |
| 0,7944344   | 0,18774 | 0,764718139 | 0,00418 | LMLN        | leishmanolysin-like (metallopeptidase M8 family)                                         |
| 0,453445164 | 0,0899  | 0,762072415 | 0,04686 | LMNA        | lamin A/C                                                                                |
| 0,666187413 | 0,14277 | 0,817335328 | 0,04905 | LMNA        | lamin A/C                                                                                |
| 0,812815602 | 0,23057 | 0,722966147 | 0,00303 | LMO4        | LIM domain only 4                                                                        |
| 1,00486382  | 0,97953 | 0,844400887 | 0,0148  | LMO7        | LIM domain 7                                                                             |
| 0,827596816 | 0,24927 | 0,810003474 | 0,00168 | LMTK2       | lemur tyrosine kinase 2                                                                  |
| 1,060687741 | 0,43468 | 0,927230546 | 0,03883 | LMTK2       | lemur tyrosine kinase 2                                                                  |
| 1,092777739 | 0,55419 | 1,180992661 | 0,00289 | LMX1B       | LIM homeobox transcription factor 1, beta                                                |
| 0,724471077 | 0,17049 | 0,817902059 | 0,00175 | LNPEP       | leucyl/cystinyl aminopeptidase                                                           |
| 0,560194607 | 0,2206  | 0,60667678  | 0,00004 | LNPEP       | leucyl/cystinyl aminopeptidase                                                           |
| 0,956608158 | 0,78477 | 0,747942879 | 0,00034 | LNPEP       | leucyl/cystinyl aminopeptidase                                                           |
| 0,810003474 | 0,28265 | 0,713507253 | 0       | LNX2        | ligand of numb-protein X 2                                                               |
| 1,122721422 | 0,44008 | 0,882091365 | 0,03121 | LOC10000967 | hypothetical LOC100009676                                                                |
| 0,84323111  | 0,08311 | 1,106497353 | 0,01684 | LOC10012788 | hypothetical LOC100127888                                                                |
| 1,241427492 | 0,4157  | 0,831622098 | 0,02666 | LOC10012798 | hypothetical protein LOC100127983                                                        |
| 0,887611337 | 0,29838 | 1,121943481 | 0,04321 | LOC10012807 | hypothetical LOC100128071                                                                |
| 1,094293701 | 0,31581 | 1,198309021 | 0,02094 | LOC10012812 | hypothetical LOC100128126                                                                |
| 1,065846736 | 0,48443 | 1,278985581 | 0,00651 | LOC10012825 | hypothetical LOC100128252                                                                |
| 1,039579435 | 0,55531 | 1,155886707 | 0,00276 | LOC10012828 | hypothetical LOC100128281                                                                |
| 1,151887642 | 0,17355 | 1,123499903 | 0,04057 | LOC10012833 | gap junction protein, gamma 3, 30.2kDa pseudogene                                        |
| 1,120389214 | 0,30858 | 1,258757174 | 0,00147 | LOC10012834 | hypothetical LOC100128343                                                                |
| 1,133669413 | 0,27659 | 1,165541198 | 0,03825 | LOC10012878 | hypothetical LOC100128788                                                                |
| 0,879649076 | 0,62785 | 0,581560021 | 0,00012 | LOC10012882 | hypothetical LOC100128822                                                                |
| 1,223488041 | 0,06986 | 1,129747215 | 0,03551 | LOC10012897 | hypothetical LOC100128977                                                                |
| 1,299539062 | 0,11014 | 1,382232207 | 0       | LOC10012903 | hypothetical LOC100129034                                                                |
| 0,998614666 | 0,99017 | 1,164733586 | 0,00423 | LOC10012903 | hypothetical LOC100129034                                                                |
| 1,180174343 | 0,09055 | 1,224336392 | 0,00362 | LOC10012909 | hypothetical protein LOC100129098                                                        |
| 1,067325338 | 0,50453 | 0,865136691 | 0,01162 | LOC10012936 | hypothetical LOC100129361                                                                |
| 0,738157203 | 0,20065 | 0,655196702 | 0,00033 | LOC10012938 | hypothetical LOC100129387                                                                |
| 1,074749173 | 0,50192 | 1,172022284 | 0,00854 | LOC10012942 | hypothetical LOC100129427                                                                |
| 1,276328769 | 0,05171 | 1,180174343 | 0,03627 | LOC10012944 | PRO2055                                                                                  |
| 1,142346247 | 0,16719 | 1,124278924 | 0,02102 | LOC10012945 | hypothetical LOC100129455                                                                |
| 0,927230546 | 0,5816  | 0,815072332 | 0,00991 | LOC10012950 | hypothetical LOC100129502                                                                |
| 0,735093668 | 0,19327 | 0,809442217 | 0,03306 | LOC10012955 | hypothetical LOC100129550                                                                |

|              |         |             |         |             |                                             |              |
|--------------|---------|-------------|---------|-------------|---------------------------------------------|--------------|
| 1,0238469    | 0,90226 | 1,387992719 | 0,00078 | LOC10012963 | hypothetical                                | LOC100129637 |
| 0,963929808  | 0,68031 | 1,099616149 | 0,02248 | LOC10012971 | hypothetical                                | LOC100129716 |
| 1,002081605  | 0,98345 | 1,110338834 | 0,04584 | LOC10012985 | hypothetical                                | LOC100129858 |
| 1,190856849  | 0,16016 | 1,138394029 | 0,04999 | LOC10012988 | hypothetical protein                        | LOC100129884 |
| 1,112650121  | 0,20983 | 1,145517898 | 0,00694 | LOC10013005 | hypothetical protein                        | LOC100130051 |
| 1,021012126  | 0,8336  | 1,125838586 | 0,01155 | LOC10013011 | hypothetical                                | LOC100130111 |
| 1,111108729  | 0,32346 | 1,108032348 | 0,03022 | LOC10013015 | hypothetical                                | LOC100130155 |
| 1,093535457  | 0,29239 | 1,110338834 | 0,02324 | LOC10013027 | hypothetical protein                        | LOC100130278 |
| 1,087488391  | 0,35299 | 1,147902414 | 0,00271 | LOC10013028 | hypothetical                                | LOC100130285 |
| 1,078480432  | 0,27413 | 1,137605228 | 0,0165  | LOC10013042 | IGY565                                      |              |
| 1,062895674  | 0,56658 | 1,188383105 | 0,00368 | LOC10013045 | hypothetical                                | LOC100130456 |
| 1,070288698  | 0,46069 | 1,188383105 | 0,002   | LOC10013052 | hypothetical                                | LOC100130522 |
| 0,944747041  | 0,67321 | 0,801069878 | 0,01616 | LOC10013070 | hypothetical protein                        | LOC100130705 |
| 0,968618189  | 0,76033 | 1,077733145 | 0,04316 | LOC10013093 | hypothetical                                | LOC100130938 |
| 0,866336856  | 0,07107 | 0,868140228 | 0,0414  | LOC10013098 | hypothetical                                | LOC100130987 |
| 0,833931044  | 0,36924 | 0,751059963 | 0,00256 | LOC10013106 | hypothetical                                | LOC100131067 |
| 1,087488391  | 0,50947 | 1,172834949 | 0,0276  | LOC10013109 | hypothetical                                | LOC100131096 |
| 1,078480432  | 0,32146 | 0,891928519 | 0,03404 | LOC10013118 | hypothetical                                | LOC100131180 |
| 0,847332435  | 0,18968 | 0,79940583  | 0,01131 | LOC10013126 | hypothetical                                | LOC100131262 |
| 0,999307093  | 0,99522 | 1,162314108 | 0,02569 | LOC10013130 | hypothetical                                | LOC100131303 |
| 1,071030823  | 0,29513 | 1,133669413 | 0,00886 | LOC10013134 | RAD52 motif 1                               | pseudogene   |
| 1,148698355  | 0,11555 | 1,110338834 | 0,03105 | LOC10013136 | hypothetical                                | LOC100131366 |
| 1,059218335  | 0,53965 | 1,232852325 | 0,00008 | LOC10013153 | hypothetical                                | LOC100131532 |
| 1,204972315  | 0,28687 | 1,190856849 | 0,00813 | LOC10013156 | hypothetical                                | LOC100131564 |
| 1,087488391  | 0,26609 | 1,17772279  | 0,00069 | LOC10013186 | hypothetical protein                        | LOC100131864 |
| 0,828744904  | 0,09815 | 0,782954296 | 0,00607 | LOC10013216 | hypothetical                                | LOC100132167 |
| 1,051172909  | 0,63732 | 1,159095952 | 0,03397 | LOC10013227 | hypothetical                                | LOC100132273 |
| 1,310393404  | 0,05344 | 1,260503392 | 0,00048 | LOC10013235 | hypothetical                                | LOC100132354 |
| 1,016774673  | 0,8407  | 1,143138335 | 0,03021 | LOC10013281 | hypothetical                                | LOC100132815 |
| 0,953298545  | 0,54123 | 1,139183377 | 0,03251 | LOC10013298 | hypothetical                                | LOC100132987 |
| 1,172834949  | 0,05511 | 1,149494848 | 0,00135 | LOC10013298 | hypothetical                                | LOC100132987 |
| 0,964598185  | 0,5988  | 0,893785162 | 0,01321 | LOC10013331 | PRO1804                                     |              |
| 1,065108203  | 0,53069 | 1,117287138 | 0,02172 | LOC10013346 | hypothetical                                | LOC100133461 |
| 1,037419937  | 0,72263 | 1,133669413 | 0,00987 | LOC10013361 | hypothetical                                | LOC100133612 |
| 1,142346247  | 0,24346 | 1,200803427 | 0,01235 | LOC10013361 | hypothetical                                | LOC100133612 |
| 1,121166078  | 0,28944 | 1,271031689 | 0,00004 | LOC10013398 | hypothetical                                | LOC100133985 |
| 1,223488041  | 0,10964 | 1,151089491 | 0,02287 | LOC10013404 | hypothetical                                | LOC100134040 |
| 1,17772279   | 0,21926 | 1,238848698 | 0,00888 | LOC10013425 | hypothetical                                | LOC100134259 |
| 0,901875378  | 0,23419 | 0,877821798 | 0,01209 | LOC10013493 | hypothetical                                | LOC100134937 |
| 1,068065408  | 0,3301  | 1,190856849 | 0,00082 | LOC10014459 | hypothetical                                | LOC100144597 |
| 0,768970416  | 0,10315 | 0,858565436 | 0,04087 | LOC10019093 | hypothetical                                | LOC100190938 |
| 1,0268689546 | 0,85743 | 1,29056249  | 0,00285 | LOC10019093 | hypothetical                                | LOC100190939 |
| 1,189207115  | 0,1047  | 1,134455485 | 0,02883 | LOC10019093 | hypothetical                                | LOC100190939 |
| 1,173648178  | 0,33387 | 0,842062954 | 0,03397 | LOC10019093 | hypothetical                                | LOC100190939 |
| 1,093535457  | 0,85457 | 0,709561678 | 0,02864 | LOC10019098 | hypothetical                                | LOC100190986 |
| 0,748461493  | 0,53305 | 0,665725807 | 0,02416 | LOC10019098 | hypothetical                                | LOC100190986 |
| 1,109569472  | 0,33248 | 1,207480591 | 0,01002 | LOC10019237 | hypothetical                                | LOC100192378 |
| 1,218410264  | 0,14502 | 1,132883885 | 0,01139 | LOC10021647 | hypothetical                                | LOC100216479 |
| 0,722465199  | 0,08354 | 0,644387315 | 0,00004 | LOC10021654 | hypothetical                                | LOC100216546 |
| 1,10343374   | 0,18778 | 1,140763716 | 0,03629 | LOC10024073 | hypothetical                                | LOC100240734 |
| 1,195819797  | 0,18305 | 0,862741345 | 0,01092 | LOC10027221 | hypothetical                                | LOC100272217 |
| 0,920187651  | 0,30735 | 1,104964485 | 0,02385 | LOC10028692 | DnaJ (Hsp40) homolog, subfamily B, member 3 | pseudogene   |
| 0,988285652  | 0,91952 | 1,153485605 | 0,00158 | LOC10028703 | hypothetical                                | LOC100287030 |
| 1,223488041  | 0,06675 | 1,20664392  | 0,01236 | LOC10028755 | hypothetical                                | LOC100287558 |
| 1,122721422  | 0,31471 | 1,197478705 | 0,03969 | LOC10028807 | hypothetical                                | LOC100288079 |
| 1,009751298  | 0,94092 | 0,85027416  | 0,01086 | LOC10028819 | hypothetical                                | LOC100288198 |
| 0,943438251  | 0,68294 | 0,84323111  | 0,01072 | LOC10028841 | LP9056 protein                              |              |
| 1,069547088  | 0,35884 | 1,132098902 | 0,0043  | LOC10028849 | hypothetical                                | LOC100288490 |
| 0,819036698  | 0,35316 | 0,656105627 | 0,00065 | LOC10028867 | hypothetical protein                        | LOC100288675 |
| 1,054822317  | 0,44351 | 1,143138335 | 0,01921 | LOC10028879 | hypothetical                                | LOC100288798 |
| 0,855595026  | 0,39087 | 0,836826243 | 0,01048 | LOC10028901 | hypothetical                                | LOC100289019 |
| 1,030968319  | 0,77662 | 1,138394029 | 0,01962 | LOC10028904 | hypothetical                                | LOC100289045 |
| 1,025978145  | 0,78537 | 1,116512962 | 0,04017 | LOC10028909 | hypothetical protein                        | LOC100289090 |
| 1,107264584  | 0,22486 | 1,108032348 | 0,03632 | LOC10028909 | hypothetical protein                        | LOC100289090 |
| 1,340712592  | 0,09732 | 1,271913007 | 0,00052 | LOC10028909 | hypothetical                                | LOC100289098 |
| 1,097331938  | 0,50331 | 1,111879158 | 0,03537 | LOC10028936 | hypothetical                                | LOC100289361 |
| 0,906261938  | 0,35725 | 0,888226796 | 0,04953 | LOC10029414 | hypothetical                                | LOC100294145 |
| 1,02313747   | 0,74556 | 0,920825697 | 0,02969 | LOC10029436 | hypothetical                                | LOC100294362 |
| 1,215879283  | 0,09451 | 1,163120042 | 0,01091 | LOC10042278 | hypothetical                                | LOC100422781 |
| 0,938221197  | 0,4772  | 1,154285418 | 0,02774 | LOC10049919 | hypothetical                                | LOC100499194 |
| 1,060687741  | 0,57343 | 0,858565436 | 0,02919 | LOC10049948 | hypothetical                                | LOC100499489 |
| 1,073260286  | 0,3476  | 1,121166078 | 0,01026 | LOC10050548 | hypothetical                                | LOC100505481 |
| 1,20163605   | 0,05988 | 1,170398641 | 0,02538 | LOC10050548 | hypothetical                                | LOC100505483 |
| 1,209994089  | 0,07302 | 1,236275261 | 0,00792 | LOC10050551 | hypothetical                                | LOC100505515 |
| 1,121943481  | 0,24498 | 1,108032348 | 0,01617 | LOC10050553 | hypothetical                                | LOC100505536 |
| 1,085229372  | 0,35561 | 1,131314463 | 0,02779 | LOC10050559 | hypothetical                                | LOC100505592 |
| 1,139973273  | 0,2909  | 1,095052471 | 0,03    | LOC10050560 | hypothetical                                | LOC100505606 |
| 1,162314108  | 0,25124 | 1,146312186 | 0,01626 | LOC10050562 | hypothetical                                | LOC100505624 |
| 1,215036792  | 0,05106 | 1,246601194 | 0,00378 | LOC10050564 | hypothetical                                | LOC100505644 |
| 0,868140228  | 0,2121  | 0,837406488 | 0,03828 | LOC10050567 | hypothetical                                | LOC100505679 |
| 0,688247801  | 0,05656 | 0,758383773 | 0,01252 | LOC10050570 | hypothetical                                | LOC100505702 |
| 0,954621014  | 0,71161 | 1,098854218 | 0,04763 | LOC10050592 | hypothetical                                | LOC100505928 |
| 1,057018041  | 0,44551 | 1,092777739 | 0,03404 | LOC10050594 | hypothetical                                | LOC100505942 |
| 1,041021598  | 0,61497 | 1,106497353 | 0,03494 | LOC10050596 | hypothetical                                | LOC100505967 |
| 1,143930973  | 0,23404 | 1,2397077   | 0,00864 | LOC10050604 | hypothetical                                | LOC100506047 |
| 1,028826708  | 0,67891 | 1,142346247 | 0,01436 | LOC10050606 | hypothetical                                | LOC100506068 |
| 1,131314463  | 0,25764 | 1,221793102 | 0,01423 | LOC10050608 | hypothetical                                | LOC100506088 |
| 1,128182137  | 0,224   | 1,21335356  | 0,00369 | LOC10050608 | hypothetical                                | LOC100506089 |
| 1,055553718  | 0,53071 | 1,097331938 | 0,02692 | LOC10050612 | hypothetical                                | LOC100506126 |
| 1,159899655  | 0,09226 | 1,132098902 | 0,01119 | LOC10050617 | hypothetical                                | LOC100506172 |
| 1,148698355  | 0,18087 | 1,121943481 | 0,02812 | LOC10050619 | hypothetical                                | LOC100506190 |
| 1,063632673  | 0,42745 | 1,156688184 | 0,02377 | LOC10050621 | hypothetical                                | LOC100506216 |
| 0,866336856  | 0,4925  | 0,795536484 | 0,03841 | LOC10050623 | hypothetical                                | LOC100506233 |
| 1,052631155  | 0,62413 | 1,142346247 | 0,03699 | LOC10050625 | hypothetical                                | LOC100506258 |
| 0,959292961  | 0,71449 | 0,880869374 | 0,04973 | LOC10050631 | hypothetical                                | LOC100506312 |
| 0,862143545  | 0,12591 | 0,829319546 | 0,00078 | LOC10050631 | hypothetical                                | LOC100506314 |
| 1,065108203  | 0,66064 | 1,126619228 | 0,02916 | LOC10050631 | hypothetical                                | LOC100506319 |
| 1,127400412  | 0,192   | 1,156688184 | 0,02008 | LOC10050638 | hypothetical                                | LOC100506380 |
| 0,950659101  | 0,65444 | 0,899378312 | 0,02531 | LOC10050639 | hypothetical                                | LOC100506392 |
| 0,960594864  | 0,69689 | 0,890692901 | 0,00312 | LOC10050655 | hypothetical                                | LOC100506558 |
| 0,928516852  | 0,45183 | 0,901250463 | 0,02343 | LOC10050664 | hypothetical                                | LOC100506642 |
| 0,997922719  | 0,98371 | 1,125838586 | 0,03723 | LOC10050665 | hypothetical                                | LOC100506655 |
| 0,833931044  | 0,09817 | 0,774319028 | 0,00641 | LOC10050666 | hypothetical                                | LOC100506661 |
| 0,963261894  | 0,91023 | 0,829319546 | 0,00653 | LOC10050671 | hypothetical                                | LOC100506710 |

|             |         |             |         |             |                                                            |
|-------------|---------|-------------|---------|-------------|------------------------------------------------------------|
| 0,905633983 | 0,32382 | 0,826450318 | 0,00442 | LOC10050671 | hypothetical LOC100506713                                  |
| 0,863339559 | 0,20156 | 0,837406488 | 0,00215 | LOC10050673 | hypothetical LOC100506730                                  |
| 0,999307093 | 0,98992 | 1,131314463 | 0,02629 | LOC10050673 | hypothetical LOC100506733                                  |
| 1,056285625 | 0,57846 | 1,203303026 | 0,01107 | LOC10050678 | hypothetical LOC100506783                                  |
| 0,908778116 | 0,12663 | 0,89564567  | 0,01627 | LOC10050684 | hypothetical LOC100506847                                  |
| 1,153485605 | 0,22333 | 1,139973273 | 0,03259 | LOC10050685 | hypothetical LOC100506853                                  |
| 1,142346247 | 0,27339 | 1,29056249  | 0,00004 | LOC10050685 | hypothetical LOC100506858                                  |
| 1,25353302  | 0,34582 | 0,771640088 | 0,02033 | LOC10050693 | hypothetical LOC100506935                                  |
| 1,085981856 | 0,21044 | 1,121943481 | 0,00474 | LOC10050693 | hypothetical LOC100506939                                  |
| 0,939522749 | 0,70423 | 0,70270935  | 0,00003 | LOC10050696 | hypothetical LOC100506966                                  |
| 0,974679631 | 0,78531 | 1,117287138 | 0,02179 | LOC10050699 | hypothetical LOC100506995                                  |
| 1,113421618 | 0,40783 | 1,230291345 | 0,02272 | LOC10050705 | hypothetical LOC100507054                                  |
| 0,879039561 | 0,23779 | 0,867538687 | 0,00364 | LOC10050707 | hypothetical LOC100507077                                  |
| 1,071773463 | 0,32103 | 1,129747215 | 0,02153 | LOC10050708 | hypothetical LOC100507086                                  |
| 0,875998315 | 0,25138 | 0,827023368 | 0,03004 | LOC10050711 | hypothetical LOC100507110                                  |
| 1,051901779 | 0,58038 | 1,155085785 | 0,00172 | LOC10050711 | hypothetical LOC100507114                                  |
| 0,764718139 | 0,29784 | 0,697855382 | 0,00058 | LOC10050715 | hypothetical LOC100507153                                  |
| 1,136816973 | 0,22983 | 1,162314108 | 0,02107 | LOC10050715 | hypothetical LOC100507156                                  |
| 1,067325338 | 0,42354 | 1,219255094 | 0,00425 | LOC10050717 | hypothetical LOC100507178                                  |
| 1,230291345 | 0,08149 | 1,118061851 | 0,04056 | LOC10050719 | hypothetical LOC100507194                                  |
| 0,975355462 | 0,77965 | 1,209994089 | 0,00871 | LOC10050720 | hypothetical LOC100507206                                  |
| 1,304050735 | 0,08454 | 1,120389214 | 0,03225 | LOC10050727 | hypothetical protein LOC100507271                          |
| 1,136029265 | 0,18914 | 1,161508732 | 0,02463 | LOC10050728 | hypothetical LOC100507286                                  |
| 1,172022284 | 0,0702  | 1,178539408 | 0,0135  | LOC10050729 | hypothetical LOC100507291                                  |
| 1,17772279  | 0,15233 | 1,143930973 | 0,03457 | LOC10050729 | hypothetical LOC100507297                                  |
| 0,988970916 | 0,88566 | 1,098854218 | 0,02814 | LOC10050729 | hypothetical LOC100507299                                  |
| 0,973329374 | 0,73649 | 1,108032348 | 0,01147 | LOC10050730 | hypothetical LOC100507300                                  |
| 0,944747041 | 0,64082 | 1,182631    | 0,03757 | LOC10050732 | hypothetical LOC100507321                                  |
| 0,750019495 | 0,27462 | 0,723467443 | 0,00011 | LOC10050734 | hypothetical LOC100507345                                  |
| 1,028826708 | 0,70347 | 1,093535457 | 0,0189  | LOC10050736 | hypothetical LOC100507362                                  |
| 0,955282936 | 0,62927 | 0,878430468 | 0,01259 | LOC10050737 | hypothetical LOC100507372                                  |
| 1,001387256 | 0,99264 | 1,161508732 | 0,02311 | LOC10050737 | hypothetical LOC100507376                                  |
| 1,095052471 | 0,40747 | 1,155886707 | 0,01508 | LOC10050738 | hypothetical LOC100507389                                  |
| 0,999307093 | 0,99489 | 1,16634937  | 0,00467 | LOC10050739 | hypothetical LOC100507395                                  |
| 1,217566019 | 0,05733 | 1,238848698 | 0,00108 | LOC10050742 | hypothetical LOC100507423                                  |
| 1,074004472 | 0,39948 | 1,159095952 | 0,00382 | LOC10050749 | hypothetical protein LOC100507494                          |
| 1,068065408 | 0,46023 | 1,106497353 | 0,00901 | LOC10050749 | hypothetical protein LOC100507494                          |
| 1,215879283 | 0,11249 | 1,20163605  | 0,00486 | LOC10050750 | hypothetical LOC100507507                                  |
| 0,823020345 | 0,33821 | 0,687770909 | 0,00012 | LOC10050756 | hypothetical LOC100507564                                  |
| 0,862741345 | 0,094   | 0,865136691 | 0,04349 | LOC10050760 | hypothetical LOC100507603                                  |
| 0,912565489 | 0,59257 | 0,847919965 | 0,00637 | LOC10050761 | hypothetical LOC100507619                                  |
| 0,942784536 | 0,45611 | 0,874784765 | 0,01585 | LOC10050761 | hypothetical LOC100507619                                  |
| 1,179356592 | 0,1267  | 1,167967395 | 0,00901 | LOC10050765 | hypothetical LOC100507652                                  |
| 1,094293701 | 0,32366 | 1,109569472 | 0,03698 | LOC10050767 | hypothetical LOC100507670                                  |
| 0,706127202 | 0,1044  | 0,757858283 | 0,00533 | LOC10050968 | hypothetical LOC100509683                                  |
| 1,117287138 | 0,24676 | 1,243149669 | 0,00082 | LOC10062830 | hypothetical LOC100628307                                  |
| 1,041021598 | 0,59452 | 1,172834949 | 0,02365 | LOC10063137 | hypothetical 100631378                                     |
| 1,118837101 | 0,29481 | 1,208317843 | 0,00666 | LOC113230   | hypothetical LOC113230                                     |
| 1,096571589 | 0,36519 | 1,231144413 | 0,00543 | LOC115110   | hypothetical LOC115110                                     |
| 1,082224645 | 0,4062  | 1,212512819 | 0,00336 | LOC127841   | hypothetical LOC127841                                     |
| 0,963929808 | 0,72051 | 1,168777249 | 0,00612 | LOC143506   | SSU72 RNA polymerase II CTD phosphatase homolog pseudogene |
| 1,208317843 | 0,13668 | 1,243149669 | 0,02008 | LOC145845   | hypothetical LOC145845                                     |
| 1,164733586 | 0,06653 | 1,242288282 | 0,00279 | LOC145945   | hypothetical protein LOC145945                             |
| 1,174461971 | 0,16094 | 1,171210181 | 0,00937 | LOC147004   | hypothetical protein LOC147004                             |
| 1,098092814 | 0,3996  | 1,197478705 | 0,00354 | LOC147646   | hypothetical protein LOC147646                             |
| 1,187559666 | 0,332   | 0,843815796 | 0,02485 | LOC148189   | hypothetical LOC148189                                     |
| 0,843815796 | 0,07371 | 0,899378312 | 0,04911 | LOC148189   | hypothetical LOC148189                                     |
| 1,135242102 | 0,2587  | 1,221793102 | 0,01181 | LOC149086   | ornithine decarboxylase 1 pseudogene                       |
| 1,130530567 | 0,19011 | 1,199971382 | 0,01511 | LOC149703   | hypothetical LOC149703                                     |
| 1,092020546 | 0,43902 | 1,170398641 | 0,00339 | LOC149773   | hypothetical LOC149773                                     |
| 1,114193651 | 0,18901 | 1,139973273 | 0,0276  | LOC150051   | hypothetical LOC150051                                     |
| 1,066585781 | 0,6339  | 1,163120042 | 0,0065  | LOC151534   | hypothetical LOC151534                                     |
| 1,043188594 | 0,6777  | 1,149494848 | 0,00719 | LOC151657   | hypothetical LOC151657                                     |
| 1,041021598 | 0,56664 | 1,132883885 | 0,01331 | LOC153469   | hypothetical LOC153469                                     |
| 1,120389214 | 0,33292 | 0,867538687 | 0,0296  | LOC153546   | hypothetical protein LOC153546                             |
| 1,071773463 | 0,44849 | 1,171210181 | 0,00643 | LOC153910   | hypothetical LOC153910                                     |
| 1,159899655 | 0,29483 | 1,109569472 | 0,02058 | LOC154822   | hypothetical LOC154822                                     |
| 0,927873476 | 0,50327 | 0,889458994 | 0,04269 | LOC157381   | hypothetical LOC157381                                     |
| 1,127400412 | 0,15486 | 1,140763716 | 0,03649 | LOC157627   | hypothetical LOC157627                                     |
| 1,057750964 | 0,37628 | 1,083725967 | 0,04373 | LOC157740   | hypothetical protein C8orf9                                |
| 1,2397077   | 0,08168 | 1,401527449 | 0       | LOC158960   | hypothetical protein BC009467                              |
| 1,23370717  | 0,06527 | 1,173648178 | 0,00988 | LOC200261   | hypothetical LOC200261                                     |
| 1,009751298 | 0,88414 | 1,08224645  | 0,03089 | LOC201477   | hypothetical LOC201477                                     |
| 1,067325338 | 0,63409 | 0,849096246 | 0,02755 | LOC201651   | arylacetamide deacetylase (esterase) pseudogene            |
| 1,066585781 | 0,71539 | 0,778624691 | 0,00411 | LOC202025   | hypothetical LOC202025                                     |
| 0,967947027 | 0,81942 | 0,788400174 | 0,02982 | LOC202781   | hypothetical LOC202781                                     |
| 1,180992661 | 0,14028 | 1,184271612 | 0,00009 | LOC203274   | hypothetical protein LOC203274                             |
| 1,066585781 | 0,53797 | 1,240567298 | 0,00225 | LOC203274   | hypothetical protein LOC203274                             |
| 1,163120042 | 0,10645 | 1,188383105 | 0,00739 | LOC219690   | hypothetical LOC219690                                     |
| 1,125838586 | 0,193   | 1,105730653 | 0,02803 | LOC219731   | hypothetical LOC219731                                     |
| 0,692074858 | 0,0975  | 0,770571108 | 0,00974 | LOC220906   | hypothetical LOC220906                                     |
| 1,118837101 | 0,31546 | 1,180992661 | 0,04432 | LOC221442   | adenylate cyclase 10 pseudogene                            |
| 1,091263877 | 0,58478 | 0,867538687 | 0,02811 | LOC221710   | hypothetical protein LOC221710                             |
| 0,853817714 | 0,49108 | 0,755236293 | 0,00434 | LOC221710   | hypothetical protein LOC221710                             |
| 0,993092495 | 0,95111 | 0,872362706 | 0,00219 | LOC221710   | hypothetical protein LOC221710                             |
| 1,141554707 | 0,14326 | 1,141554707 | 0,00983 | LOC221946   | hypothetical LOC221946                                     |
| 1,261377409 | 0,1931  | 1,254402205 | 0,00844 | LOC253039   | hypothetical LOC253039                                     |
| 1,073260286 | 0,3001  | 1,156688184 | 0,02365 | LOC254057   | hypothetical protein LOC254057                             |
| 1,051901779 | 0,60541 | 1,215879283 | 0,0086  | LOC254100   | hypothetical LOC254100                                     |
| 1,138394029 | 0,18383 | 1,169587664 | 0,00425 | LOC255025   | hypothetical LOC255025                                     |
| 1,173648178 | 0,25473 | 1,140763716 | 0,03289 | LOC255167   | hypothetical LOC255167                                     |
| 0,876605721 | 0,32458 | 0,844400887 | 0,00854 | LOC280665   | anti-CNG alpha 1 cation channel translation product-like   |
| 0,949342121 | 0,50969 | 1,139183377 | 0,02142 | LOC282980   | hypothetical LOC282980                                     |
| 1,040300267 | 0,72708 | 1,20163605  | 0,00502 | LOC283070   | hypothetical LOC283070                                     |
| 1,110338834 | 0,28185 | 1,124278924 | 0,0393  | LOC283089   | hypothetical LOC283089                                     |
| 1,082246465 | 0,38376 | 1,181811547 | 0,00106 | LOC283140   | hypothetical protein LOC283140                             |
| 1,124278924 | 0,20435 | 1,149494848 | 0,00443 | LOC283177   | hypothetical LOC283177                                     |
| 1,096571589 | 0,41051 | 1,169587664 | 0,00868 | LOC283194   | hypothetical LOC283194                                     |
| 1,121943481 | 0,15362 | 1,144724161 | 0,03633 | LOC283270   | hypothetical protein LOC283270                             |
| 0,936272247 | 0,79901 | 0,71449707  | 0,02813 | LOC283357   | hypothetical protein LOC283357                             |
| 1,231998073 | 0,13702 | 1,245737416 | 0,00129 | LOC283392   | hypothetical LOC283392                                     |
| 1,10343374  | 0,32777 | 1,153485605 | 0,00647 | LOC283403   | hypothetical LOC283403                                     |
| 0,937571096 | 0,69769 | 0,729004689 | 0,01849 | LOC283483   | hypothetical LOC283483                                     |
| 1,076240125 | 0,52368 | 1,169587664 | 0,00615 | LOC283501   | hypothetical protein LOC283501                             |

|             |         |             |         |           |                                                                                                        |
|-------------|---------|-------------|---------|-----------|--------------------------------------------------------------------------------------------------------|
| 1,073260286 | 0,32352 | 1,085229372 | 0,04306 | LOC283547 | hypothetical LOC283547                                                                                 |
| 0,789493887 | 0,34572 | 0,738669032 | 0,00554 | LOC283588 | hypothetical LOC283588                                                                                 |
| 1,130530567 | 0,20174 | 1,117287138 | 0,01829 | LOC283693 | actin, gamma pseudogene                                                                                |
| 1,026689546 | 0,88568 | 0,844986384 | 0,00949 | LOC283713 | hypothetical protein LOC283713                                                                         |
| 1,118061851 | 0,31724 | 1,152686347 | 0,00864 | LOC283788 | FSHD region gene 1 pseudogene                                                                          |
| 0,825877665 | 0,17082 | 0,86154616  | 0,01851 | LOC283788 | FSHD region gene 1 pseudogene                                                                          |
| 1,055553718 | 0,74363 | 1,245737416 | 0,00209 | LOC283887 | hypothetical LOC283887                                                                                 |
| 1,017479692 | 0,84671 | 1,121943481 | 0,01958 | LOC284080 | hypothetical LOC284080                                                                                 |
| 1,105730653 | 0,30584 | 1,187559666 | 0,00177 | LOC284100 | tyrosine 3-monooxygenase/tryptophan 5-monooxygenase activation protein, epsilon polypeptide pseudogene |
| 1,041743429 | 0,63429 | 1,078480432 | 0,03833 | LOC284240 | hypothetical LOC284240                                                                                 |
| 1,122721422 | 0,1452  | 1,121166078 | 0,02926 | LOC284276 | hypothetical LOC284276                                                                                 |
| 1,076240125 | 0,24746 | 1,257013375 | 0,00256 | LOC284276 | hypothetical LOC284276                                                                                 |
| 0,997231251 | 0,98492 | 1,136816973 | 0,01628 | LOC284373 | hypothetical protein LOC284373                                                                         |
| 1,273677475 | 0,09766 | 1,121166078 | 0,04547 | LOC284440 | hypothetical LOC284440                                                                                 |
| 1,048262476 | 0,70944 | 1,147107024 | 0,04452 | LOC284551 | hypothetical LOC284551                                                                                 |
| 1,174461971 | 0,06103 | 1,105730653 | 0,02025 | LOC284561 | hypothetical LOC284561                                                                                 |
| 1,10343374  | 0,26492 | 1,167967395 | 0,00651 | LOC284570 | hypothetical protein LOC284570                                                                         |
| 1,148698355 | 0,24638 | 1,170398641 | 0,01947 | LOC284749 | hypothetical LOC284749                                                                                 |
| 0,977385766 | 0,81756 | 0,815637493 | 0,04313 | LOC284801 | hypothetical LOC284801                                                                                 |
| 1,049716684 | 0,8085  | 0,735603373 | 0,00417 | LOC284801 | hypothetical LOC284801                                                                                 |
| 1,112650121 | 0,22374 | 1,136816973 | 0,01075 | LOC284912 | hypothetical LOC284912                                                                                 |
| 0,988970916 | 0,90949 | 1,136816973 | 0,03247 | LOC284939 | hypothetical protein LOC284939                                                                         |
| 1,107264584 | 0,51012 | 1,262252032 | 0,00549 | LOC285084 | hypothetical LOC285084                                                                                 |
| 1,118061851 | 0,52199 | 0,919550046 | 0,03796 | LOC285147 | hypothetical LOC285147                                                                                 |
| 1,149494848 | 0,18706 | 1,321338406 | 0,00082 | LOC285286 | hypothetical LOC285286                                                                                 |
| 1,062159186 | 0,3783  | 1,093535457 | 0,04123 | LOC285423 | hypothetical LOC285423                                                                                 |
| 1,158292806 | 0,08476 | 1,124278924 | 0,019   | LOC285548 | hypothetical LOC285548                                                                                 |
| 1,251796459 | 0,11358 | 1,265756594 | 0,00388 | LOC285708 | hypothetical LOC285708                                                                                 |
| 0,8962667   | 0,3225  | 0,821310701 | 0,00193 | LOC285965 | hypothetical LOC285965                                                                                 |
| 0,662044455 | 0,0973  | 0,679243142 | 0,00001 | LOC286052 | hypothetical protein LOC286052                                                                         |
| 1,041021598 | 0,65959 | 1,140763716 | 0,00901 | LOC286059 | tumor necrosis factor receptor superfamily, member 10d, decoy with truncated death domain pseudogene   |
| 1,116512962 | 0,29048 | 1,128182137 | 0,03326 | LOC286068 | hypothetical protein LOC286068                                                                         |
| 1,053361036 | 0,46088 | 1,132883885 | 0,00705 | LOC286121 | hypothetical protein LOC286121                                                                         |
| 1,118887101 | 0,27505 | 1,255271991 | 0,0018  | LOC286149 | hypothetical LOC286149                                                                                 |
| 0,846745312 | 0,07789 | 0,870550563 | 0,02169 | LOC286161 | hypothetical protein LOC286161                                                                         |
| 1,022428531 | 0,71931 | 1,099616149 | 0,0352  | LOC286359 | hypothetical LOC286359                                                                                 |
| 0,988970916 | 0,89504 | 1,100378609 | 0,0287  | LOC338653 | hypothetical LOC338653                                                                                 |
| 1,118061851 | 0,28185 | 1,402499251 | 0,00019 | LOC338799 | hypothetical LOC338799                                                                                 |
| 1,065108203 | 0,39042 | 1,127400412 | 0,04351 | LOC339260 | hypothetical LOC339260                                                                                 |
| 1,112650121 | 0,24211 | 1,095811766 | 0,02624 | LOC339442 | hypothetical LOC339442                                                                                 |
| 0,922103118 | 0,63206 | 0,870550563 | 0,04235 | LOC339535 | hypothetical LOC339535                                                                                 |
| 1,252664439 | 0,06768 | 1,130530567 | 0,01197 | LOC339539 | hypothetical protein LOC339539                                                                         |
| 1,059952783 | 0,41075 | 1,154285418 | 0,0024  | LOC339568 | hypothetical LOC339568                                                                                 |
| 1,076240125 | 0,44856 | 1,212512819 | 0,00065 | LOC339666 | hypothetical LOC339666                                                                                 |
| 1,017479692 | 0,80786 | 1,109569472 | 0,03991 | LOC339685 | hypothetical LOC339685                                                                                 |
| 1,019597683 | 0,83955 | 1,125058485 | 0,00911 | LOC339822 | hypothetical LOC339822                                                                                 |
| 1,00556058  | 0,94884 | 1,108800644 | 0,03195 | LOC340239 | hypothetical LOC340239                                                                                 |
| 1,165541198 | 0,06777 | 1,154285418 | 0,00918 | LOC340340 | hypothetical LOC340340                                                                                 |
| 1,145517898 | 0,16662 | 1,105730653 | 0,03011 | LOC340581 | hypothetical protein LOC340581                                                                         |
| 1,134455485 | 0,24104 | 1,255271991 | 0,00549 | LOC348120 | hypothetical LOC348120                                                                                 |
| 1,421092043 | 0,05858 | 1,475291457 | 0,00073 | LOC386597 | hypothetical LOC386597                                                                                 |
| 0,936272247 | 0,45321 | 1,099616149 | 0,02748 | LOC386597 | hypothetical LOC386597                                                                                 |
| 1,019597683 | 0,8224  | 1,150291893 | 0,00489 | LOC386597 | hypothetical LOC386597                                                                                 |
| 1,126619228 | 0,13952 | 1,129747215 | 0,00587 | LOC386758 | hypothetical LOC386758                                                                                 |
| 1,074004472 | 0,41598 | 1,116512962 | 0,04672 | LOC386758 | hypothetical LOC386758                                                                                 |
| 1,089752112 | 0,346   | 1,202469249 | 0,01295 | LOC387647 | patched domain containing 3 pseudogene                                                                 |
| 0,999307093 | 0,99482 | 1,114193651 | 0,04341 | LOC387895 | hypothetical LOC387895                                                                                 |
| 1,003471749 | 0,96487 | 1,130530567 | 0,00726 | LOC388387 | hypothetical LOC388387                                                                                 |
| 1,071030823 | 0,51209 | 1,186736798 | 0,01752 | LOC388906 | hypothetical LOC388906                                                                                 |
| 1,123499903 | 0,24679 | 1,099616149 | 0,03377 | LOC388942 | hypothetical LOC388942                                                                                 |
| 0,983502074 | 0,88647 | 1,151887642 | 0,01599 | LOC389023 | hypothetical LOC389023                                                                                 |
| 1,113421618 | 0,37067 | 1,100378609 | 0,04787 | LOC389199 | hypothetical LOC389199                                                                                 |
| 0,922742493 | 0,65714 | 0,787307977 | 0,00259 | LOC389834 | ankyrin repeat domain 57 pseudogene                                                                    |
| 0,74277646  | 0,16792 | 0,71400199  | 0,00056 | LOC400027 | hypothetical LOC400027                                                                                 |
| 1,441928871 | 0,05672 | 1,139973273 | 0,01828 | LOC400043 | hypothetical LOC400043                                                                                 |
| 1,249196126 | 0,26353 | 0,804966138 | 0,014   | LOC400099 | hypothetical LOC400099                                                                                 |
| 0,939522749 | 0,47003 | 1,183451022 | 0,01506 | LOC400238 | hypothetical LOC400238                                                                                 |
| 0,973329374 | 0,70423 | 0,862143545 | 0,00365 | LOC400238 | hypothetical LOC400238                                                                                 |
| 1,052631155 | 0,42177 | 1,108032348 | 0,02319 | LOC400550 | hypothetical LOC400550                                                                                 |
| 1,042465761 | 0,7287  | 0,931740429 | 0,04888 | LOC400590 | hypothetical LOC400590                                                                                 |
| 1,064370182 | 0,45776 | 0,91319825  | 0,03936 | LOC400655 | hypothetical LOC400655                                                                                 |
| 1,076240125 | 0,27457 | 0,908148418 | 0,01849 | LOC400768 | hypothetical LOC400768                                                                                 |
| 1,04608494  | 0,60679 | 1,117287138 | 0,01296 | LOC400794 | hypothetical LOC400794                                                                                 |
| 1,229438867 | 0,09033 | 1,2397077   | 0,0005  | LOC401022 | hypothetical LOC401022                                                                                 |
| 0,750019495 | 0,19874 | 0,685391402 | 0,00014 | LOC401093 | hypothetical LOC401093                                                                                 |
| 1,00765376  | 0,96255 | 1,466116757 | 0,00003 | LOC401320 | hypothetical LOC401320                                                                                 |
| 1,111879158 | 0,3824  | 1,116512962 | 0,02582 | LOC401431 | hypothetical LOC401431                                                                                 |
| 0,950000383 | 0,67748 | 0,8962667   | 0,04715 | LOC404266 | hypothetical LOC404266                                                                                 |
| 1,132098902 | 0,22732 | 1,149494848 | 0,00263 | LOC404266 | hypothetical LOC404266                                                                                 |
| 1,217566019 | 0,07747 | 0,816203046 | 0,00229 | LOC439911 | hypothetical LOC439911                                                                                 |
| 1,254402205 | 0,20671 | 1,268391399 | 0,00306 | LOC439949 | hypothetical LOC439949                                                                                 |
| 1,186736798 | 0,0641  | 1,157490217 | 0,00661 | LOC439949 | hypothetical LOC439949                                                                                 |
| 1,092777739 | 0,39714 | 1,221793102 | 0,0007  | LOC440028 | hypothetical LOC440028                                                                                 |
| 1,21167266  | 0,14981 | 1,254402205 | 0,00085 | LOC440104 | 1110012D08Rik pseudogene                                                                               |
| 0,795536484 | 0,15829 | 0,865136691 | 0,02739 | LOC440288 | hypothetical LOC440288                                                                                 |
| 1,088242442 | 0,31037 | 1,227735684 | 0,02438 | LOC440330 | hypothetical protein LOC440330                                                                         |
| 0,989656656 | 0,90152 | 1,147107024 | 0,00216 | LOC440335 | hypothetical LOC440335                                                                                 |
| 0,996540263 | 0,96788 | 0,934327347 | 0,04749 | LOC440346 | hypothetical LOC440346                                                                                 |
| 1,136029265 | 0,34544 | 1,247465572 | 0,02473 | LOC440602 | hypothetical LOC440602                                                                                 |
| 1,034547582 | 0,81823 | 1,127400412 | 0,01429 | LOC440896 | hypothetical LOC440896                                                                                 |
| 0,874784765 | 0,24112 | 0,833353207 | 0,02628 | LOC440944 | hypothetical LOC440944                                                                                 |
| 1,097331938 | 0,22536 | 1,124278924 | 0,01107 | LOC441025 | hypothetical LOC441025                                                                                 |
| 1,22603486  | 0,11662 | 1,156688184 | 0,00785 | LOC441052 | hypothetical LOC441052                                                                                 |
| 1,028113827 | 0,72338 | 1,118837101 | 0,02175 | LOC441086 | hypothetical LOC441086                                                                                 |
| 1,011152081 | 0,91393 | 1,209155676 | 0,00682 | LOC441124 | hypothetical gene supported by AK093729; BX647918                                                      |
| 1,36983298  | 0,24763 | 1,433955248 | 0,04411 | LOC441178 | hypothetical LOC441178                                                                                 |
| 1,057018041 | 0,62023 | 1,245737416 | 0,00184 | LOC441461 | hypothetical LOC441461                                                                                 |
| 0,903752727 | 0,22637 | 0,848507902 | 0,00105 | LOC441461 | hypothetical LOC441461                                                                                 |
| 1,050444544 | 0,45059 | 1,104964485 | 0,03375 | LOC441601 | septin 7 pseudogene                                                                                    |
| 1,225185332 | 0,05986 | 1,209155676 | 0,00644 | LOC474358 | hypothetical BC042079 locus                                                                            |
| 1,187559666 | 0,08072 | 1,125838586 | 0,00571 | LOC493754 | RAB guanine nucleotide exchange factor (GEF) 1 pseudogene                                              |
| 1,149494848 | 0,14184 | 1,114966219 | 0,03071 | LOC494558 | hypothetical locus LOC494558                                                                           |
| 1,033830736 | 0,57715 | 1,102669163 | 0,03137 | LOC541471 | hypothetical LOC541471                                                                                 |
| 0,839149637 | 0,26052 | 0,798851916 | 0,0356  | LOC642236 | FSHD region gene 1 pseudogene                                                                          |

|             |         |             |         |           |                                                                               |
|-------------|---------|-------------|---------|-----------|-------------------------------------------------------------------------------|
| 0,911301281 | 0,43874 | 0,778085177 | 0,00158 | LOC642361 | hypothetical LOC642361                                                        |
| 0,798851916 | 0,05488 | 0,853817714 | 0,03668 | LOC642826 | hypothetical LOC642826                                                        |
| 1,185092771 | 0,06173 | 1,149494848 | 0,01384 | LOC643714 | hypothetical LOC643714                                                        |
| 1,162314108 | 0,15332 | 1,223488041 | 0,01237 | LOC643733 | caspase 4, apoptosis-related cysteine peptidase pseudogene                    |
| 0,863339559 | 0,53779 | 0,778085177 | 0,01587 | LOC643837 | hypothetical LOC643837                                                        |
| 0,981459064 | 0,83605 | 1,209994089 | 0,00382 | LOC644794 | hypothetical LOC644794                                                        |
| 1,062895674 | 0,52388 | 1,089752112 | 0,0299  | LOC644852 | hypothetical LOC644852                                                        |
| 1,029540083 | 0,71088 | 0,908148418 | 0,03364 | LOC645513 | hypothetical LOC645513                                                        |
| 0,976031761 | 0,85574 | 0,84264683  | 0,01604 | LOC645676 | hypothetical LOC645676                                                        |
| 0,979420298 | 0,7569  | 1,085981856 | 0,02306 | LOC646241 | hypothetical LOC646241                                                        |
| 1,074004472 | 0,40864 | 1,139973273 | 0,02656 | LOC646268 | hCG1654703                                                                    |
| 1,22010051  | 0,05048 | 1,126619228 | 0,01614 | LOC646324 | hypothetical LOC646324                                                        |
| 1,098092814 | 0,22888 | 1,164733586 | 0,00625 | LOC646627 | phospholipase inhibitor                                                       |
| 1,024556823 | 0,79781 | 1,119612889 | 0,04064 | LOC646701 | developmental pluripotency associated 5 pseudogene                            |
| 1,154285418 | 0,19497 | 1,163120042 | 0,00739 | LOC646778 | hypothetical LOC646778                                                        |
| 1,043188594 | 0,72361 | 1,286989247 | 0,00046 | LOC647589 | hypothetical protein LOC647589                                                |
| 1,087488391 | 0,32615 | 1,092777739 | 0,04165 | LOC647589 | hypothetical protein LOC647589                                                |
| 1,071030823 | 0,74399 | 0,683020128 | 0,00071 | LOC650794 | hypothetical LOC650794                                                        |
| 0,827596816 | 0,06903 | 0,849096246 | 0,04244 | LOC650794 | hypothetical LOC650794                                                        |
| 1,169587664 | 0,09204 | 1,160703914 | 0,00706 | LOC652276 | hypothetical LOC652276                                                        |
| 0,618995145 | 0,19714 | 0,652477474 | 0,00668 | LOC653602 | hypothetical LOC653602                                                        |
| 0,924663278 | 0,68758 | 0,793883931 | 0,01806 | LOC654433 | hypothetical LOC654433                                                        |
| 1,120389214 | 0,27385 | 1,340712592 | 0,00005 | LOC692247 | hypothetical locus LOC692247                                                  |
| 1,025978145 | 0,81312 | 0,803850991 | 0,00235 | LOC727916 | hypothetical protein LOC727916                                                |
| 0,76684133  | 0,29067 | 0,669427628 | 0,00217 | LOC728061 | hCG2003663                                                                    |
| 1,078480432 | 0,43582 | 1,192508872 | 0,00127 | LOC728175 | hypothetical LOC728175                                                        |
| 1,056285625 | 0,65286 | 0,815637493 | 0,00197 | LOC728342 | hypothetical protein LOC728342                                                |
| 1,125838586 | 0,1468  | 1,175276328 | 0,00794 | LOC728723 | hypothetical LOC728723                                                        |
| 0,998614666 | 0,99014 | 0,801069878 | 0,00023 | LOC728730 | hypothetical LOC728730                                                        |
| 1,190856849 | 0,08387 | 1,198309021 | 0,00413 | LOC728743 | zinc finger protein pseudogene                                                |
| 1,293248932 | 0,09943 | 1,330529041 | 0,00062 | LOC728855 | hypothetical LOC728855                                                        |
| 1,204972315 | 0,05208 | 1,199139914 | 0,00672 | LOC728855 | hypothetical LOC728855                                                        |
| 0,753667455 | 0,21208 | 0,763129604 | 0,00009 | LOC729082 | hypothetical LOC729082                                                        |
| 1,136029265 | 0,28129 | 1,238848698 | 0,00295 | LOC729173 | hypothetical LOC729173                                                        |
| 0,801069878 | 0,07565 | 0,821880187 | 0,01479 | LOC729178 | hypothetical LOC729178                                                        |
| 1,052631155 | 0,51212 | 1,142346247 | 0,0039  | LOC729291 | hypothetical protein LOC729291                                                |
| 0,940826108 | 0,49776 | 0,852634892 | 0,03164 | LOC729570 | hypothetical LOC729570                                                        |
| 1,25962998  | 0,10286 | 1,285206337 | 0,00854 | LOC729678 | hypothetical LOC729678                                                        |
| 1,107264584 | 0,25988 | 1,121943481 | 0,0256  | LOC729683 | hypothetical protein LOC729683                                                |
| 1,154285418 | 0,35358 | 1,198309021 | 0,00705 | LOC729810 | hypothetical protein LOC729810                                                |
| 1,151887642 | 0,10526 | 1,147902414 | 0,0086  | LOC729866 | hCG1994895                                                                    |
| 1,086734863 | 0,50664 | 0,886381699 | 0,0059  | LOC730102 | quinone oxidoreductase-like protein 2 pseudogene                              |
| 1,105730653 | 0,23254 | 1,191682575 | 0,00229 | LOC730139 | hypothetical LOC730139                                                        |
| 1,128182137 | 0,11788 | 1,121943481 | 0,03161 | LOC730227 | hypothetical LOC730227                                                        |
| 1,018891197 | 0,88351 | 1,107264584 | 0,03934 | LOC730441 | trypsin X3 pseudogene                                                         |
| 1,144724161 | 0,18784 | 1,175276328 | 0,0018  | LOC732275 | hypothetical LOC732275                                                        |
| 1,150291893 | 0,08358 | 1,131314463 | 0,00808 | LOC79015  | hypothetical LOC79015                                                         |
| 1,020304659 | 0,84252 | 1,243149669 | 0,00138 | LOC81691  | exonuclease NEF-sp                                                            |
| 1,182631    | 0,06698 | 1,29145735  | 0,0002  | LOC84856  | hypothetical LOC84856                                                         |
| 1,07997656  | 0,53535 | 1,202469249 | 0,00727 | LOC84931  | hypothetical LOC84931                                                         |
| 1,040300267 | 0,59296 | 1,132098902 | 0,03315 | LOC92249  | hypothetical LOC92249                                                         |
| 1,130530567 | 0,28992 | 1,215879283 | 0,00707 | LOC92659  | hypothetical LOC92659                                                         |
| 1,209155676 | 0,07295 | 1,180992661 | 0,00762 | LOC93444  | hypothetical protein LOC93444                                                 |
| 0,969289817 | 0,75108 | 0,895025071 | 0,03324 | LOC93622  | hypothetical LOC93622                                                         |
| 1,289668251 | 0,34283 | 1,370782805 | 0,00372 | LOXL1     | lysyl oxidase-like 1                                                          |
| 1,143930973 | 0,33231 | 1,29145735  | 0,00236 | LOXL2     | lysyl oxidase-like 2                                                          |
| 1,136029265 | 0,4014  | 1,20163605  | 0,00265 | LOXL3     | lysyl oxidase-like 3                                                          |
| 1,278985581 | 0,05689 | 1,182631    | 0,01326 | LOXL4     | lysyl oxidase-like 4                                                          |
| 1,243149669 | 0,09261 | 1,231144413 | 0,00179 | LPAR1     | lysophosphatidic acid receptor 1                                              |
| 1,047536127 | 0,58573 | 1,143930973 | 0,01602 | LPAR2     | lysophosphatidic acid receptor 2                                              |
| 0,832775771 | 0,28318 | 0,784040454 | 0,01068 | LPAR5     | lysophosphatidic acid receptor 5                                              |
| 0,86154616  | 0,47157 | 0,77271055  | 0,00517 | LPCAT2    | lysophosphatidylcholine acyltransferase 2                                     |
| 0,76630998  | 0,31599 | 0,786762445 | 0,00606 | LPCAT2    | lysophosphatidylcholine acyltransferase 2                                     |
| 1,165541198 | 0,28204 | 1,262252032 | 0,00101 | LPCAT4    | lysophosphatidylcholine acyltransferase 4                                     |
| 0,997922719 | 0,98777 | 0,785128119 | 0,00615 | LPCAT4    | lysophosphatidylcholine acyltransferase 4                                     |
| 1,111108729 | 0,28348 | 1,141554707 | 0,03783 | LPCAT4    | lysophosphatidylcholine acyltransferase 4                                     |
| 0,888226796 | 0,49675 | 0,643494624 | 0,00026 | LPGAT1    | lysophosphatidylglycerol acyltransferase 1                                    |
| 1,092777739 | 0,64279 | 1,316766922 | 0,03596 | LPL       | lipoprotein lipase                                                            |
| 1,043188594 | 0,66951 | 1,152686347 | 0,03791 | LPPR2     | lipid phosphate phosphatase-related protein type 2                            |
| 0,682073917 | 0,13416 | 0,725476104 | 0,00038 | LRBA      | LPS-responsive vesicle trafficking, beach and anchor containing               |
| 0,939522749 | 0,77521 | 0,77916458  | 0,00965 | LRRH3     | leucine-rich repeats and calponin homology (CH) domain containing 3           |
| 1,027401439 | 0,91609 | 0,774855931 | 0,00622 | LRRH3     | leucine-rich repeats and calponin homology (CH) domain containing 3           |
| 1,063632673 | 0,51168 | 1,128182137 | 0,02462 | LRRG1     | leucine-rich repeats and immunoglobulin-like domains 1                        |
| 0,749499801 | 0,25041 | 0,837406488 | 0,03351 | LRRG2     | leucine-rich repeats and immunoglobulin-like domains 2                        |
| 1,071030823 | 0,41487 | 1,108800644 | 0,01522 | LRRG2     | leucine-rich repeats and immunoglobulin-like domains 2                        |
| 1,163120042 | 0,12843 | 1,116512962 | 0,04198 | LRRG2     | leucine-rich repeat, immunoglobulin-like and transmembrane domains 1          |
| 0,986916546 | 0,9131  | 1,238848698 | 0,03877 | LRP1      | low density lipoprotein receptor-related protein 1                            |
| 0,868140228 | 0,16243 | 0,835087919 | 0,01319 | LRP10     | low density lipoprotein receptor-related protein 10                           |
| 0,730016005 | 0,1074  | 0,738669032 | 0,00201 | LRP10     | low density lipoprotein receptor-related protein 10                           |
| 0,936921447 | 0,76549 | 0,806641759 | 0,01758 | LRP12     | low density lipoprotein receptor-related protein 12                           |
| 1,068805991 | 0,63971 | 1,252664439 | 0,03446 | LRP5      | low density lipoprotein receptor-related protein 5                            |
| 0,823020345 | 0,12626 | 0,866336856 | 0,01766 | LRP6      | low density lipoprotein receptor-related protein 6                            |
| 0,856188285 | 0,10867 | 0,84264683  | 0,00689 | LRP6      | low density lipoprotein receptor-related protein 6                            |
| 0,890075733 | 0,44127 | 0,752101876 | 0,0024  | LRP8      | low density lipoprotein receptor-related protein 8, apolipoprotein e receptor |
| 1,172834949 | 0,17337 | 1,173648178 | 0,00068 | LRPAP1    | low density lipoprotein receptor-related protein associated protein 1         |
| 1,060687741 | 0,54315 | 1,159095952 | 0,00155 | LRPPRC    | leucine-rich PPR-motif containing                                             |
| 0,775393206 | 0,0951  | 0,812252396 | 0,00018 | LRPPRC    | leucine-rich PPR-motif containing                                             |
| 0,912565489 | 0,61896 | 0,775930854 | 0,00562 | LRPPRC    | leucine-rich PPR-motif containing                                             |
| 0,982139595 | 0,78427 | 1,106497353 | 0,03839 | LRRC14    | leucine rich repeat containing 14                                             |
| 0,96727633  | 0,86452 | 1,492778383 | 0,00386 | LRRC15    | leucine rich repeat containing 15                                             |
| 0,986232704 | 0,88177 | 1,135242102 | 0,02303 | LRRC16A   | leucine rich repeat containing 16A                                            |
| 1,002776436 | 0,98296 | 1,165541198 | 0,00174 | LRRC23    | leucine rich repeat containing 23                                             |
| 1,333298677 | 0,11997 | 1,364147835 | 0,0001  | LRRC32    | leucine rich repeat containing 32                                             |
| 1,028113827 | 0,74872 | 1,277213759 | 0,00261 | LRRC37A4  | leucine rich repeat containing 37, member A4 (pseudogene)                     |
| 1,125058485 | 0,1231  | 1,121943481 | 0,04595 | LRRC37BP1 | leucine rich repeat containing 37B pseudogene 1                               |
| 1,049716684 | 0,52131 | 0,909408252 | 0,03063 | LRRC39    | leucine rich repeat containing 39                                             |
| 0,753667455 | 0,08531 | 0,812815602 | 0,00854 | LRRC4     | leucine rich repeat containing 4                                              |
| 0,848507902 | 0,43809 | 0,73153561  | 0,00218 | LRRC40    | leucine rich repeat containing 40                                             |
| 1,088997015 | 0,48871 | 1,225185332 | 0,01425 | LRRC43    | leucine rich repeat containing 43                                             |
| 1,112650121 | 0,28823 | 1,208317843 | 0,00856 | LRRC43    | leucine rich repeat containing 43                                             |
| 0,790589117 | 0,06533 | 0,840313752 | 0,00215 | LRRC47    | leucine rich repeat containing 47                                             |
| 1,128964405 | 0,17041 | 1,187559666 | 0,00228 | LRRC55    | leucine rich repeat containing 55                                             |
| 0,824162085 | 0,36255 | 0,660211421 | 0,00135 | LRRC57    | leucine rich repeat containing 57                                             |
| 1,175276328 | 0,12207 | 1,243149669 | 0,00125 | LRRC6     | leucine rich repeat containing 6                                              |



|             |         |             |         |          |                                                                             |
|-------------|---------|-------------|---------|----------|-----------------------------------------------------------------------------|
| 1,172022284 | 0,07943 | 1,127400412 | 0,0467  | LRRC71   | leucine rich repeat containing 71                                           |
| 0,799960128 | 0,11615 | 0,890692901 | 0,01055 | LRRC8A   | leucine rich repeat containing 8 family, member A                           |
| 0,77271055  | 0,31606 | 0,813379198 | 0,02096 | LRRC8A   | leucine rich repeat containing 8 family, member A                           |
| 0,996540263 | 0,98906 | 0,827023368 | 0,00167 | LRRC8B   | leucine rich repeat containing 8 family, member B                           |
| 0,955945318 | 0,83107 | 0,835666959 | 0,01832 | LRRC8B   | leucine rich repeat containing 8 family, member B                           |
| 1,300440147 | 0,21571 | 1,243149669 | 0,0383  | LRRC8C   | leucine rich repeat containing 8 family, member C                           |
| 0,722966147 | 0,26289 | 0,824733549 | 0,01068 | LRRC8E   | leucine rich repeat containing 8 family, member E                           |
| 0,733566672 | 0,13347 | 0,713012859 | 0,00002 | LRRC8E   | leucine rich repeat containing 8 family, member E                           |
| 0,548285794 | 0,05613 | 0,749499801 | 0,00162 | LRRFIP1  | leucine rich repeat (in FLII) interacting protein 1                         |
| 0,631126016 | 0,0518  | 0,829894586 | 0,00365 | LRRFIP1  | leucine rich repeat (in FLII) interacting protein 1                         |
| 0,798851916 | 0,14257 | 0,803293997 | 0,00579 | LRRFIP1  | leucine rich repeat (in FLII) interacting protein 1                         |
| 0,759435845 | 0,17702 | 0,785128119 | 0,00349 | LRRFIP1  | leucine rich repeat (in FLII) interacting protein 1                         |
| 0,712518807 | 0,09981 | 0,727490342 | 0,00233 | LRRFIP1  | leucine rich repeat (in FLII) interacting protein 1                         |
| 1,015366101 | 0,91531 | 1,437936533 | 0,00266 | LRRN3    | leucine rich repeat neuronal 3                                              |
| 1,167158102 | 0,236   | 1,250062303 | 0,00552 | LRRN3    | leucine rich repeat neuronal 3                                              |
| 1,151887642 | 0,18347 | 1,128182137 | 0,02791 | LRTM1    | leucine-rich repeats and transmembrane domains 1                            |
| 1,112650121 | 0,17503 | 1,139973273 | 0,01565 | LRTOMT   | leucine rich transmembrane and O-methyltransferase domain containing        |
| 1,188383105 | 0,0799  | 1,265756594 | 0,00018 | LRTOMT   | leucine rich transmembrane and O-methyltransferase domain containing        |
| 1,257013375 | 0,22503 | 1,271031689 | 0,00499 | LSAMP    | limbic system-associated membrane protein                                   |
| 0,791685866 | 0,16141 | 0,866336856 | 0,00975 | LSG1     | large subunit GTPase 1 homolog (S. cerevisiae)                              |
| 1,311302014 | 0,13585 | 1,318593614 | 0,00083 | LSM10    | LSM10, U7 small nuclear RNA associated                                      |
| 0,878430468 | 0,48994 | 0,837406488 | 0,00896 | LSM11    | LSM11, U7 small nuclear RNA associated                                      |
| 0,731028724 | 0,10583 | 0,812252396 | 0,00143 | LSM14A   | LSM14A, SCD6 homolog A (S. cerevisiae)                                      |
| 1,035264924 | 0,75714 | 0,911301281 | 0,04202 | LSM3     | LSM3 homolog, U6 small nuclear RNA associated (S. cerevisiae)               |
| 0,919550046 | 0,72604 | 0,756283999 | 0,00647 | LSM5     | LSM5 homolog, U6 small nuclear RNA associated (S. cerevisiae)               |
| 1,091263877 | 0,72672 | 0,755759964 | 0,00237 | LSM5     | LSM5 homolog, U6 small nuclear RNA associated (S. cerevisiae)               |
| 0,844986384 | 0,1449  | 0,77916458  | 0,00002 | LSM5     | LSM5 homolog, U6 small nuclear RNA associated (S. cerevisiae)               |
| 1,400556321 | 0,1001  | 1,568080908 | 0,00029 | LSP1     | lymphocyte-specific protein 1                                               |
| 1,307671349 | 0,10319 | 1,586667686 | 0,00001 | LST1     | leukocyte specific transcript 1                                             |
| 1,303147149 | 0,21682 | 1,440929749 | 0,00033 | LST1     | leukocyte specific transcript 1                                             |
| 1,271031689 | 0,15553 | 1,469168633 | 0,00116 | LST1     | leukocyte specific transcript 1                                             |
| 1,274560627 | 0,20847 | 1,509425969 | 0,00008 | LST1     | leukocyte specific transcript 1                                             |
| 1,293248932 | 0,09349 | 1,374588696 | 0,0007  | LST1     | leukocyte specific transcript 1                                             |
| 1,172022284 | 0,09751 | 1,222640278 | 0,00094 | LTB      | lymphotoxin beta (TNF superfamily, member 3)                                |
| 1,329607108 | 0,07897 | 1,304954948 | 0,01635 | LTB      | lymphotoxin beta (TNF superfamily, member 3)                                |
| 1,237132479 | 0,16181 | 1,189207115 | 0,02437 | LTC4S    | leukotriene C4 synthase                                                     |
| 1,074004472 | 0,48946 | 1,22603486  | 0,00119 | LTK      | leukocyte receptor tyrosine kinase                                          |
| 0,853817714 | 0,41105 | 0,87175824  | 0,01806 | LTN1     | listerin E3 ubiquitin protein ligase 1                                      |
| 0,909408252 | 0,30138 | 0,852044095 | 0,00097 | LTN1     | listerin E3 ubiquitin protein ligase 1                                      |
| 0,808320869 | 0,49738 | 0,628942486 | 0,00204 | LTN1     | listerin E3 ubiquitin protein ligase 1                                      |
| 0,720464874 | 0,07684 | 0,792234811 | 0,00201 | LUC7L2   | LUC7-like 2 (S. cerevisiae)                                                 |
| 0,669427628 | 0,07463 | 0,85797053  | 0,04545 | LUC7L2   | LUC7-like 2 (S. cerevisiae)                                                 |
| 0,817902059 | 0,16417 | 0,847919965 | 0,0033  | LUC7L2   | LUC7-like 2 (S. cerevisiae)                                                 |
| 0,789493887 | 0,31238 | 0,834509281 | 0,04082 | LUC7L2   | LUC7-like 2 (S. cerevisiae)                                                 |
| 0,652025368 | 0,20494 | 0,773782497 | 0,00326 | LUC7L3   | LUC7-like 3 (S. cerevisiae)                                                 |
| 0,853226098 | 0,37508 | 0,888226796 | 0,0394  | LUC7L3   | LUC7-like 3 (S. cerevisiae)                                                 |
| 0,639049682 | 0,09487 | 0,635956503 | 0,00018 | LUC7L3   | LUC7-like 3 (S. cerevisiae)                                                 |
| 1,085981856 | 0,48919 | 1,29056249  | 0,00406 | LUM      | lumican                                                                     |
| 0,608361179 | 0,06854 | 0,736113431 | 0,00192 | LUZP1    | leucine zipper protein 1                                                    |
| 1,058484395 | 0,84209 | 1,366987452 | 0,00347 | LY6E     | lymphocyte antigen 6 complex, locus E                                       |
| 1,019597683 | 0,8091  | 1,119612889 | 0,00913 | LY6K     | lymphocyte antigen 6 complex, locus K                                       |
| 1,286989247 | 0,10727 | 1,375541818 | 0,00171 | LY86     | lymphocyte antigen 86                                                       |
| 0,610896551 | 0,15281 | 0,66296288  | 0,00057 | LYAR     | Ly1 antibody reactive homolog (mouse)                                       |
| 0,968618189 | 0,65499 | 1,134455485 | 0,02741 | LYG1     | lysozyme G-like 1                                                           |
| 0,955282936 | 0,59272 | 0,926588062 | 0,04415 | LYG2     | lysozyme G-like 2                                                           |
| 1,463071221 | 0,2477  | 1,624504793 | 0,00004 | LYN      | v-yes-1 Yamaguchi sarcoma viral related oncogene homolog                    |
| 0,96996191  | 0,67696 | 0,848507902 | 0,00789 | LYNX1    | Ly6/neurotoxin 1                                                            |
| 0,588861395 | 0,05694 | 0,813379198 | 0,00062 | LYPD3    | LY6/PLAUR domain containing 3                                               |
| 0,839149637 | 0,05744 | 0,837406488 | 0,03793 | LYPD6    | LY6/PLAUR domain containing 6                                               |
| 1,192508872 | 0,6984  | 0,794985251 | 0,00509 | LYPLA1   | lysophospholipase I                                                         |
| 0,872967591 | 0,4188  | 0,779704843 | 0,02127 | LYPLA1   | lysophospholipase I                                                         |
| 1,008352455 | 0,959   | 0,85086373  | 0,03437 | LYRM1    | LYR motif containing 1                                                      |
| 0,66296288  | 0,12075 | 0,71946679  | 0,00263 | LYRM2    | LYR motif containing 2                                                      |
| 0,829894586 | 0,10548 | 0,784040454 | 0       | LYRM2    | LYR motif containing 2                                                      |
| 1,065846736 | 0,49781 | 1,149494848 | 0,0063  | LYRM2    | LYR motif containing 2                                                      |
| 0,89564567  | 0,5689  | 0,845572287 | 0,03288 | LYRM5    | LYR motif containing 5                                                      |
| 1,043911927 | 0,77862 | 0,791685866 | 0,01704 | LYRM5    | LYR motif containing 5                                                      |
| 0,722966147 | 0,161   | 0,738669032 | 0,00364 | LYRM7    | LYrm7 homolog (mouse)                                                       |
| 0,729004689 | 0,06579 | 0,771105413 | 0,0358  | LYRM7    | LYrm7 homolog (mouse)                                                       |
| 0,759435845 | 0,14859 | 0,754190038 | 0,01282 | LYRM7    | LYrm7 homolog (mouse)                                                       |
| 0,682073917 | 0,12763 | 0,730016005 | 0,00016 | LYST     | lysosomal trafficking regulator                                             |
| 1,078480432 | 0,40023 | 1,168777249 | 0,00101 | LYVE1    | lymphatic vessel endothelial hyaluronan receptor 1                          |
| 0,964598185 | 0,82074 | 0,841479482 | 0,0113  | LZIC     | leucine zipper and CTNBP1 domain containing                                 |
| 0,939522749 | 0,79685 | 0,851453708 | 0,04593 | LZTF1    | leucine zipper transcription factor-like 1                                  |
| 0,775930854 | 0,0734  | 0,837406488 | 0,04852 | LZTF1    | leucine zipper transcription factor-like 1                                  |
| 1,037419937 | 0,76521 | 1,168777249 | 0,03722 | LZTR1    | leucine zipper-like transcription regulator 1                               |
| 1,04608494  | 0,71204 | 1,138394029 | 0,02674 | LZTS1    | leucine zipper, putative tumor suppressor 1                                 |
| 1,015366101 | 0,88385 | 1,120389214 | 0,01137 | LZTS1    | leucine zipper, putative tumor suppressor 1                                 |
| 1,155085785 | 0,26978 | 1,172834949 | 0,04469 | LZTS2    | leucine zipper, putative tumor suppressor 2                                 |
| 1,173648178 | 0,06631 | 1,126619228 | 0,04771 | M1       | hypothetical LOC100507027                                                   |
| 1,121943481 | 0,24589 | 1,125838586 | 0,0122  | M6PR     | mannose-6-phosphate receptor (cation dependent)                             |
| 0,875998315 | 0,27194 | 0,727490342 | 0,00904 | MAB21L3  | mab-21-like 3 (C. elegans)                                                  |
| 0,71548826  | 0,09383 | 0,800514811 | 0,0104  | MACF1    | microtubule-actin crosslinking factor 1                                     |
| 0,696888619 | 0,06336 | 0,872967591 | 0,0042  | MACF1    | microtubule-actin crosslinking factor 1                                     |
| 0,782411782 | 0,07359 | 0,837406488 | 0,00483 | MACF1    | microtubule-actin crosslinking factor 1                                     |
| 0,770037174 | 0,05442 | 0,76154437  | 0,00016 | MACROD1  | MACRO domain containing 1                                                   |
| 1,021012126 | 0,92712 | 0,773782497 | 0,04813 | MAD2L1   | MAD2 mitotic arrest deficient-like 1 (yeast)                                |
| 1,130530567 | 0,2023  | 1,115739322 | 0,01028 | MAD2L1BP | MAD2L1 binding protein                                                      |
| 1,114193651 | 0,60027 | 1,185914499 | 0,00827 | MAD2L2   | MAD2 mitotic arrest deficient-like 2 (yeast)                                |
| 0,70027816  | 0,27182 | 0,806082831 | 0,00024 | MAEA     | macrophage erythroblast attacher                                            |
| 0,750019495 | 0,28585 | 0,777007269 | 0,00009 | MAFB     | v-maf musculoaponeurotic fibrosarcoma oncogene homolog B (avian)            |
| 1,079228237 | 0,3833  | 1,096571589 | 0,02894 | MAGEB2   | melanoma antigen family B, 2                                                |
| 1,054091423 | 0,56818 | 1,158292806 | 0,0019  | MAGED1   | melanoma antigen family D, 1                                                |
| 1,052631155 | 0,79839 | 1,219255094 | 0,00024 | MAGED2   | melanoma antigen family D, 2                                                |
| 1,311302014 | 0,16971 | 0,829894586 | 0,0313  | MAGI2    | membrane associated guanylate kinase, WW and PDZ domain containing 2        |
| 0,703684188 | 0,08033 | 0,76154437  | 0,00601 | MAGI3    | membrane associated guanylate kinase, WW and PDZ domain containing 3        |
| 1,146312186 | 0,15125 | 1,209994089 | 0,0156  | MAGIX    | MAGI family member, X-linked                                                |
| 1,136029265 | 0,08449 | 1,154285418 | 0,00853 | MAGIX    | MAGI family member, X-linked                                                |
| 0,906890329 | 0,22403 | 0,864537231 | 0,02272 | MAGIX    | MAGI family member, X-linked                                                |
| 0,727994774 | 0,08277 | 0,656560563 | 0,00552 | MAGT1    | magnesium transporter 1                                                     |
| 0,792324811 | 0,13394 | 0,807760778 | 0,00083 | MAK16    | MAK16 homolog (S. cerevisiae)                                               |
| 0,951318276 | 0,71663 | 0,852634892 | 0,04762 | MALAT1   | metastasis associated lung adenocarcinoma transcript 1 (non-protein coding) |
| 0,732550437 | 0,16568 | 0,755236293 | 0,00213 | MALAT1   | metastasis associated lung adenocarcinoma transcript 1 (non-protein coding) |
| 0,936921447 | 0,86503 | 0,691595315 | 0,04    | MALAT1   | metastasis associated lung adenocarcinoma transcript 1 (non-protein coding) |

|             |         |             |         |           |                                                                                             |
|-------------|---------|-------------|---------|-----------|---------------------------------------------------------------------------------------------|
| 0,653382627 | 0,22207 | 0,698823486 | 0,00011 | MALAT1    | metastasis associated lung adenocarcinoma transcript 1 (non-protein coding)                 |
| 0,635075491 | 0,09547 | 0,794985251 | 0,02995 | MALL      | mal, T-cell differentiation protein-like                                                    |
| 0,704660378 | 0,08922 | 0,711531371 | 0,00052 | MALT1     | mucosa associated lymphoid tissue lymphoma translocation gene 1                             |
| 0,536258308 | 0,07865 | 0,408951029 | 0,00016 | MAMDC2    | MAM domain containing 2                                                                     |
| 1,079228237 | 0,55478 | 1,232852325 | 0,01512 | MAMDC4    | MAM domain containing 4                                                                     |
| 0,637722196 | 0,15081 | 0,656560563 | 0,00011 | MAML3     | mastermind-like 3 (Drosophila)                                                              |
| 1,185092771 | 0,14298 | 1,143930973 | 0,01449 | MAMSTR    | MEF2 activating motif and SAP domain containing transcriptional regulator                   |
| 1,28788163  | 0,08689 | 1,170222284 | 0,03882 | MAN1C1    | mannosidase, alpha, class 1C, member 1                                                      |
| 1,063632673 | 0,56031 | 1,144724161 | 0,00641 | MAN2A2    | mannosidase, alpha, class 2A, member 2                                                      |
| 1,382232207 | 0,13152 | 1,492778383 | 0,00056 | MAN2B1    | mannosidase, alpha, class 2B, member 1                                                      |
| 1,035982764 | 0,74946 | 1,244011653 | 0,00654 | MAN2C1    | mannosidase, alpha, class 2C, member 1                                                      |
| 0,785672517 | 0,25573 | 0,737134609 | 0,00082 | MANSC1    | MANSC domain containing 1                                                                   |
| 1,136816973 | 0,26369 | 1,374588696 | 0,00154 | MAP1A     | microtubule-associated protein 1A                                                           |
| 1,120389214 | 0,63251 | 1,335148303 | 0,00993 | MAP1B     | microtubule-associated protein 1B                                                           |
| 1,019597683 | 0,77521 | 1,125058485 | 0,01217 | MAP1LC3B2 | microtubule-associated protein 1 light chain 3 beta 2                                       |
| 0,91383145  | 0,34513 | 0,846745312 | 0,02456 | MAP2K3    | mitogen-activated protein kinase kinase 3                                                   |
| 0,549808075 | 0,05285 | 0,733566672 | 0,00732 | MAP2K5    | mitogen-activated protein kinase kinase 5                                                   |
| 1,089752112 | 0,49236 | 1,189207115 | 0,00267 | MAP2K7    | mitogen-activated protein kinase kinase 7                                                   |
| 0,798298386 | 0,20106 | 0,8362464   | 0,04933 | MAP3K1    | mitogen-activated protein kinase kinase kinase 1                                            |
| 1,046810282 | 0,69638 | 1,139183377 | 0,01188 | MAP3K10   | mitogen-activated protein kinase kinase kinase 10                                           |
| 1,216722359 | 0,15918 | 1,391846392 | 0,00026 | MAP3K12   | mitogen-activated protein kinase kinase kinase 12                                           |
| 1,148698355 | 0,07356 | 1,155886707 | 0,03161 | MAP3K12   | mitogen-activated protein kinase kinase kinase 12                                           |
| 0,828744904 | 0,39667 | 0,812252396 | 0,00541 | MAP3K2    | mitogen-activated protein kinase kinase kinase 2                                            |
| 0,879039561 | 0,38395 | 0,882091365 | 0,04351 | MAP3K2    | mitogen-activated protein kinase kinase kinase 2                                            |
| 1,071030823 | 0,68861 | 0,827023368 | 0,0158  | MAP3K2    | mitogen-activated protein kinase kinase kinase 2                                            |
| 1,43097652  | 0,23825 | 1,232852325 | 0,00324 | MAP3K5    | mitogen-activated protein kinase kinase kinase 5                                            |
| 0,986916546 | 0,95174 | 0,842062954 | 0,02623 | MAP3K7    | mitogen-activated protein kinase kinase kinase 7                                            |
| 0,889458994 | 0,52868 | 0,786762445 | 0,00523 | MAP3K7    | mitogen-activated protein kinase kinase kinase 7                                            |
| 0,763658749 | 0,09063 | 0,802737389 | 0,01025 | MAP4      | microtubule-associated protein 4                                                            |
| 1,412254404 | 0,10049 | 1,463071221 | 0,0002  | MAP4K1    | mitogen-activated protein kinase kinase kinase kinase 1                                     |
| 1,295042999 | 0,14242 | 1,378405153 | 0,0008  | MAP4K1    | mitogen-activated protein kinase kinase kinase kinase 1                                     |
| 0,78132788  | 0,40108 | 0,716480825 | 0,00822 | MAP4K3    | mitogen-activated protein kinase kinase kinase kinase 3                                     |
| 0,741747467 | 0,11345 | 0,749498901 | 0,00542 | MAP4K4    | mitogen-activated protein kinase kinase kinase kinase 4                                     |
| 0,961927455 | 0,72516 | 1,151887642 | 0,03082 | MAP6      | microtubule-associated protein 6                                                            |
| 1,145517898 | 0,07492 | 1,107264584 | 0,03059 | MAP9      | microtubule-associated protein 9                                                            |
| 1,131314463 | 0,25099 | 1,179356592 | 0,01146 | MAPK11    | mitogen-activated protein kinase 11                                                         |
| 1,144724161 | 0,2154  | 1,32592576  | 0,00089 | MAPK12    | mitogen-activated protein kinase 12                                                         |
| 1,125838586 | 0,17278 | 1,139183377 | 0,01263 | MAPK12    | mitogen-activated protein kinase 12                                                         |
| 0,837406488 | 0,23069 | 0,832775771 | 0,00274 | MAPK14    | mitogen-activated protein kinase 14                                                         |
| 0,950659101 | 0,58085 | 0,814507563 | 0,00004 | MAPK1IP1L | mitogen-activated protein kinase 1 interacting protein 1-like                               |
| 0,89564567  | 0,30341 | 0,85027416  | 0,00109 | MAPK1IP1L | mitogen-activated protein kinase 1 interacting protein 1-like                               |
| 0,781869643 | 0,11856 | 0,779704843 | 0,00088 | MAPK1IP1L | mitogen-activated protein kinase 1 interacting protein 1-like                               |
| 1,071030823 | 0,26273 | 1,155085785 | 0,00247 | MAPK4     | mitogen-activated protein kinase 4                                                          |
| 0,741233505 | 0,11827 | 0,833931044 | 0,01041 | MAPK7     | mitogen-activated protein kinase 7                                                          |
| 1,216722359 | 0,1017  | 1,329607108 | 0,00025 | MAPK8     | mitogen-activated protein kinase 8                                                          |
| 0,886381699 | 0,22365 | 0,814507563 | 0,0143  | MAPK8     | mitogen-activated protein kinase 8                                                          |
| 0,961260928 | 0,64235 | 0,782954296 | 0,00004 | MAPKAP1   | mitogen-activated protein kinase associated protein 1                                       |
| 1,162314108 | 0,22618 | 1,162314108 | 0,04883 | MAPKAPK2  | mitogen-activated protein kinase-activated protein kinase 2                                 |
| 0,746906729 | 0,10528 | 0,842062954 | 0,03221 | MAPKAPK5  | mitogen-activated protein kinase-activated protein kinase 5                                 |
| 0,604158922 | 0,06269 | 0,75180739  | 0,03363 | MAPRE1    | microtubule-associated protein, RP/EB family, member 1                                      |
| 0,991716731 | 0,93751 | 1,143138335 | 0,01506 | MAPRE3    | microtubule-associated protein, RP/EB family, member 3                                      |
| 0,944092419 | 0,89493 | 0,732550437 | 0,00031 | MARCH6    | membrane-associated ring finger (C3HC4) 6                                                   |
| 0,875998315 | 0,51753 | 0,837406488 | 0,0097  | MARCH7    | membrane-associated ring finger (C3HC4) 7                                                   |
| 0,76684133  | 0,20282 | 0,76154437  | 0,00011 | MARCH7    | membrane-associated ring finger (C3HC4) 7                                                   |
| 0,869947353 | 0,42323 | 0,85027416  | 0,02458 | MARK1     | MAP/microtubule affinity-regulating kinase 1                                                |
| 0,832775771 | 0,46061 | 0,77271055  | 0,00953 | MARK1     | MAP/microtubule affinity-regulating kinase 1                                                |
| 0,974679631 | 0,82444 | 0,864537231 | 0,03517 | MARS2     | methionyl-tRNA synthetase 2, mitochondrial                                                  |
| 1,121166078 | 0,36084 | 1,200803427 | 0,00126 | MARVELD1  | MARVEL domain containing 1                                                                  |
| 1,149494848 | 0,20445 | 1,140763716 | 0,0139  | MARVELD1  | MARVEL domain containing 1                                                                  |
| 0,804966138 | 0,30548 | 0,825877665 | 0,00783 | MARVELD2  | MARVEL domain containing 2                                                                  |
| 0,762600827 | 0,06876 | 0,788400174 | 0,01112 | MARVELD2  | MARVEL domain containing 2                                                                  |
| 1,001387256 | 0,99065 | 1,102669163 | 0,03376 | MASP1     | mannan-binding lectin serine peptidase 1 (C4/C2 activating component of Ra-reactive factor) |
| 1,203303026 | 0,32149 | 1,352848231 | 0,00304 | MASP1     | mannan-binding lectin serine peptidase 1 (C4/C2 activating component of Ra-reactive factor) |
| 1,017479692 | 0,90133 | 1,168777249 | 0,01347 | MAST3     | microtubule associated serine/threonine kinase 3                                            |
| 0,621574834 | 0,06012 | 0,686818117 | 0       | MAST4     | microtubule associated serine/threonine kinase family member 4                              |
| 0,700763725 | 0,20577 | 0,710053679 | 0,00001 | MAST4     | microtubule associated serine/threonine kinase family member 4                              |
| 0,704172113 | 0,07212 | 0,700763725 | 0,00124 | MASTL     | microtubule associated serine/threonine kinase-like                                         |
| 1,204972315 | 0,05272 | 1,255271991 | 0,00076 | MAT1A     | methionine adenosyltransferase I, alpha                                                     |
| 1,037419937 | 0,64772 | 1,147107024 | 0,01622 | MATL2963  | hypothetical LOC283314                                                                      |
| 0,936272247 | 0,46158 | 1,231144413 | 0,00856 | MATL2963  | hypothetical LOC283314                                                                      |
| 0,918276162 | 0,69848 | 1,198309021 | 0,00134 | MAVS      | mitochondrial antiviral signaling protein                                                   |
| 0,957271458 | 0,66251 | 0,868742185 | 0,00716 | MAX       | MYC associated factor X                                                                     |
| 1,032398535 | 0,7865  | 1,162314108 | 0,00944 | MAZ       | MYC-associated zinc finger protein (purine-binding transcription factor)                    |
| 1,170398641 | 0,12112 | 1,135242102 | 0,012   | MB        | myoglobin                                                                                   |
| 0,798851916 | 0,08523 | 0,805524291 | 0,00163 | MBD2      | methyl-CpG binding domain protein 2                                                         |
| 1,216722359 | 0,12087 | 1,124278924 | 0,03365 | MBD2      | methyl-CpG binding domain protein 2                                                         |
| 0,892546971 | 0,5729  | 0,741233505 | 0,01485 | MBIP      | MAP3K12 binding inhibitory protein 1                                                        |
| 1,28788163  | 0,05795 | 1,151089491 | 0,02441 | MBL1P     | mannose-binding lectin (protein A) 1, pseudogene                                            |
| 0,825305409 | 0,40135 | 0,710546022 | 0,00032 | MBLAC2    | metallo-beta-lactamase domain containing 2                                                  |
| 0,842062954 | 0,40375 | 0,879039561 | 0,02792 | MBNL1     | muscleblind-like (Drosophila)                                                               |
| 1,044635763 | 0,64476 | 1,261377409 | 0,00014 | MBNL1     | muscleblind-like (Drosophila)                                                               |
| 0,948026965 | 0,57002 | 0,799960128 | 0,00094 | MBNL3     | muscleblind-like 3 (Drosophila)                                                             |
| 0,723467443 | 0,17045 | 0,739693755 | 0,00014 | MBNL3     | muscleblind-like 3 (Drosophila)                                                             |
| 1,002776436 | 0,96772 | 0,8362464   | 0,00262 | MBNL3     | muscleblind-like 3 (Drosophila)                                                             |
| 0,802737389 | 0,15241 | 0,855002178 | 0,03139 | MBOAT2    | membrane bound O-acyltransferase domain containing 2                                        |
| 1,041021598 | 0,78446 | 1,213353556 | 0,03213 | MBOAT7    | membrane bound O-acyltransferase domain containing 7                                        |
| 1,068805991 | 0,29038 | 1,159899655 | 0,02459 | MBOAT7    | membrane bound O-acyltransferase domain containing 7                                        |
| 0,718968266 | 0,20033 | 0,79940583  | 0,00027 | MBP       | myelin basic protein                                                                        |
| 0,91319825  | 0,5619  | 1,284315809 | 0,00678 | MBP       | myelin basic protein                                                                        |
| 0,775930854 | 0,35526 | 0,672217497 | 0,00001 | MBP       | myelin basic protein                                                                        |
| 0,822450069 | 0,13949 | 0,860949188 | 0,01965 | MBP       | myelin basic protein                                                                        |
| 0,807201075 | 0,34784 | 0,824733549 | 0,02336 | MBTD1     | mbt domain containing 1                                                                     |
| 0,76154437  | 0,33587 | 0,798298386 | 0,02277 | MBTD1     | mbt domain containing 1                                                                     |
| 1,070288698 | 0,64883 | 1,168777249 | 0,0023  | MBTPS1    | membrane-bound transcription factor peptidase, site 1                                       |
| 1,022428531 | 0,8956  | 1,141554707 | 0,01275 | MBTPS1    | membrane-bound transcription factor peptidase, site 1                                       |
| 0,961927455 | 0,86096 | 0,897510051 | 0,03439 | MBTPS2    | membrane-bound transcription factor peptidase, site 2                                       |
| 1,018891197 | 0,93756 | 1,257884972 | 0,00362 | MCAM      | melanoma cell adhesion molecule                                                             |
| 0,790589117 | 0,13204 | 0,87539133  | 0,025   | MCCC2     | methylcrotonoyl-CoA carboxylase 2 (beta)                                                    |
| 0,757333158 | 0,06524 | 0,712518807 | 0,00546 | MCCC2     | methylcrotonoyl-CoA carboxylase 2 (beta)                                                    |
| 0,980779004 | 0,81366 | 0,928516852 | 0,04253 | MCF2      | MCF.2 cell line derived transforming sequence                                               |
| 1,147902414 | 0,10368 | 1,217566019 | 0,00573 | MCF2L     | MCF.2 cell line derived transforming sequence-like                                          |
| 1,092777739 | 0,30389 | 1,131314463 | 0,03132 | MCF2L     | MCF.2 cell line derived transforming sequence-like                                          |
| 1,076240125 | 0,65575 | 1,200803427 | 0,02017 | MCF2L     | MCF.2 cell line derived transforming sequence-like                                          |
| 0,877821798 | 0,23011 | 0,833353207 | 0,0119  | MCM10     | minichromosome maintenance complex component 10                                             |

|             |         |             |         |            |                                                                                      |
|-------------|---------|-------------|---------|------------|--------------------------------------------------------------------------------------|
| 0,799960128 | 0,05396 | 0,803293997 | 0,01265 | MCM3AP-AS1 | MCM3AP antisense RNA 1 (non-protein coding)                                          |
| 0,772175133 | 0,05465 | 0,784040454 | 0,00058 | MCM4       | minichromosome maintenance complex component 4                                       |
| 0,963929808 | 0,77894 | 0,899378312 | 0,04567 | MCM6       | minichromosome maintenance complex component 6                                       |
| 1,025978145 | 0,83765 | 0,923382311 | 0,03513 | MCM6       | minichromosome maintenance complex component 6                                       |
| 0,964598185 | 0,84739 | 0,727490342 | 0,00052 | MCM9       | minichromosome maintenance complex component 9                                       |
| 0,76950361  | 0,18018 | 0,775930854 | 0,0026  | MCMBP      | minichromosome maintenance complex binding protein                                   |
| 0,990342872 | 0,88762 | 0,908778116 | 0,03773 | MCMBP      | minichromosome maintenance complex binding protein                                   |
| 0,897510051 | 0,56057 | 0,862741345 | 0,00863 | MCPP1      | microcephalin 1                                                                      |
| 0,859160755 | 0,15138 | 1,197478705 | 0,00382 | MCPP1      | microcephalin 1                                                                      |
| 1,70408819  | 0,075   | 1,365093718 | 0,01481 | MCTP1      | multiple C2 domains, transmembrane 1                                                 |
| 1,382232207 | 0,09695 | 1,283425898 | 0,02532 | MCTP2      | multiple C2 domains, transmembrane 2                                                 |
| 1,070288698 | 0,61592 | 1,230291345 | 0,0025  | MDC1       | mediator of DNA-damage checkpoint 1                                                  |
| 1,053361036 | 0,7535  | 0,755759964 | 0,01661 | MDFIC      | MyoD family inhibitor domain containing                                              |
| 1,058484395 | 0,56479 | 0,855595026 | 0,00242 | MDFIC      | MyoD family inhibitor domain containing                                              |
| 1,2397077   | 0,09649 | 1,275444392 | 0,01496 | MDGA1      | MAM domain containing glycosylphosphatidylinositol anchor 1                          |
| 1,120389214 | 0,19563 | 1,131314463 | 0,01872 | MDH1B      | malate dehydrogenase 1B, NAD (soluble)                                               |
| 1,100378609 | 0,47442 | 0,894404902 | 0,01894 | MDM2       | Mdm2 p53 binding protein homolog (mouse)                                             |
| 1,476314406 | 0,09268 | 1,436940177 | 0,00606 | MDM4       | Mdm4 p53 binding protein homolog (mouse)                                             |
| 0,832198735 | 0,44316 | 0,689680461 | 0,0021  | MDN1       | MDN1, midasin homolog (yeast)                                                        |
| 0,787307977 | 0,24659 | 0,837406488 | 0,00249 | MDN1       | MDN1, midasin homolog (yeast)                                                        |
| 1,125838586 | 0,15932 | 1,133669413 | 0,01876 | MDS2       | myelodysplastic syndrome 2 translocation associated                                  |
| 0,564091069 | 0,06179 | 0,621574834 | 0,00011 | ME1        | malic enzyme 1, NADP(+)-dependent, cytosolic                                         |
| 1,053361036 | 0,62808 | 1,278099363 | 0,00329 | ME3        | malic enzyme 3, NADP(+)-dependent, mitochondrial                                     |
| 1,270150983 | 0,19539 | 1,257884972 | 0,02118 | MECOM      | MDS1 and EVI1 complex locus                                                          |
| 1,657489809 | 0,06792 | 1,299539062 | 0,00928 | MECOM      | MDS1 and EVI1 complex locus                                                          |
| 0,809442217 | 0,455   | 0,787853886 | 0,01905 | MED1       | mediator complex subunit 1                                                           |
| 0,929160674 | 0,78653 | 0,734075318 | 0,00033 | MED1       | mediator complex subunit 1                                                           |
| 1,011152081 | 0,9471  | 1,164733586 | 0,03535 | MED12      | mediator complex subunit 12                                                          |
| 0,829894586 | 0,23095 | 0,853226098 | 0,0037  | MED13      | mediator complex subunit 13                                                          |
| 1,059952783 | 0,50881 | 1,163120042 | 0,02415 | MED13      | mediator complex subunit 13                                                          |
| 0,808320869 | 0,1691  | 0,800514811 | 0,00184 | MED13      | mediator complex subunit 13                                                          |
| 0,924022572 | 0,64753 | 0,820172911 | 0,00074 | MED13L     | mediator complex subunit 13-like                                                     |
| 0,843815796 | 0,35429 | 0,828170661 | 0,01985 | MED14      | mediator complex subunit 14                                                          |
| 0,813379198 | 0,407   | 0,727490342 | 0,00398 | MED14      | mediator complex subunit 14                                                          |
| 1,051901779 | 0,51439 | 1,088242442 | 0,04473 | MED14      | mediator complex subunit 14                                                          |
| 0,813379198 | 0,06118 | 0,823591017 | 0,04201 | MED16      | mediator complex subunit 16                                                          |
| 0,809442217 | 0,12683 | 0,763658749 | 0,00507 | MED17      | mediator complex subunit 17                                                          |
| 0,672683604 | 0,05604 | 0,710546022 | 0,00962 | MED21      | mediator complex subunit 21                                                          |
| 1,159899655 | 0,45271 | 1,462057448 | 0,00267 | MED22      | mediator complex subunit 22                                                          |
| 0,832198735 | 0,46048 | 0,77916458  | 0,00058 | MED23      | mediator complex subunit 23                                                          |
| 1,065846736 | 0,75682 | 0,808320869 | 0,0002  | MED23      | mediator complex subunit 23                                                          |
| 1,166349937 | 0,21217 | 1,172834949 | 0,04635 | MED25      | mediator complex subunit 25                                                          |
| 1,074004472 | 0,4559  | 0,910669834 | 0,04554 | MED26      | mediator complex subunit 26                                                          |
| 0,908148418 | 0,50642 | 0,797192477 | 0,00022 | MED28      | mediator complex subunit 28                                                          |
| 0,813379198 | 0,25351 | 0,895025071 | 0,01107 | MED29      | mediator complex subunit 29                                                          |
| 1,250062303 | 0,19814 | 0,823591017 | 0,00522 | MED30      | mediator complex subunit 30                                                          |
| 1,00695555  | 0,954   | 0,753667455 | 0,0014  | MED30      | mediator complex subunit 30                                                          |
| 1,140763716 | 0,08846 | 0,892546971 | 0,02803 | MED31      | mediator complex subunit 31                                                          |
| 0,905633983 | 0,63123 | 0,658839976 | 0,00002 | MED31      | mediator complex subunit 31                                                          |
| 0,827023368 | 0,41515 | 0,788946841 | 0,00463 | MED4       | mediator complex subunit 4                                                           |
| 1,133669413 | 0,58416 | 0,878430468 | 0,04768 | MED7       | mediator complex subunit 7                                                           |
| 1,102669163 | 0,28229 | 1,155085785 | 0,00537 | MED7       | mediator complex subunit 7                                                           |
| 0,668037039 | 0,05576 | 0,778624691 | 0,00279 | MED8       | mediator complex subunit 8                                                           |
| 0,872967591 | 0,12606 | 0,845572287 | 0,00085 | MED8       | mediator complex subunit 8                                                           |
| 0,801069878 | 0,051   | 0,791137301 | 0,01114 | MEF2A      | myocyte enhancer factor 2A                                                           |
| 1,157490217 | 0,23553 | 1,2397077   | 0,01948 | MEFV       | Mediterranean fever                                                                  |
| 1,109569472 | 0,27339 | 1,209994089 | 0,00095 | MEG3       | maternally expressed 3 (non-protein coding)                                          |
| 1,082224645 | 0,41211 | 1,143930973 | 0,03114 | MEGF10     | multiple EGF-like-domains 10                                                         |
| 1,052631155 | 0,64165 | 1,229438867 | 0,00092 | MEGF11     | multiple EGF-like-domains 11                                                         |
| 0,668500248 | 0,10271 | 0,723969086 | 0,01676 | MEIS1      | Meis homeobox 1                                                                      |
| 0,796088099 | 0,17428 | 0,76418826  | 0,04291 | MEIS2      | Meis homeobox 2                                                                      |
| 1,074004472 | 0,51788 | 1,144724161 | 0,02769 | MEIS3      | Meis homeobox 3                                                                      |
| 0,847332435 | 0,28458 | 0,840313752 | 0,01097 | MELK       | maternal embryonic leucine zipper kinase                                             |
| 1,237990291 | 0,05035 | 1,192508872 | 0,02339 | MEPE       | matrix extracellular phosphoglycoprotein                                             |
| 0,984184022 | 0,88623 | 1,142346247 | 0,03244 | MERTK      | c-mer proto-oncogene tyrosine kinase                                                 |
| 1,035982764 | 0,78633 | 0,906890329 | 0,02782 | MESDC2     | mesoderm development candidate 2                                                     |
| 1,118061851 | 0,19268 | 1,101141598 | 0,02469 | MESDC2     | mesoderm development candidate 2                                                     |
| 1,121943481 | 0,22702 | 1,184271612 | 0,04702 | MESP2      | mesoderm posterior 2 homolog (mouse)                                                 |
| 0,720464874 | 0,12881 | 0,750019495 | 0,00008 | MET        | met proto-oncogene (hepatocyte growth factor receptor)                               |
| 0,906890329 | 0,41864 | 1,118837101 | 0,03993 | METAP1D    | methionyl aminopeptidase type 1D (mitochondrial)                                     |
| 0,947370071 | 0,44262 | 0,899378312 | 0,02122 | METAP2     | methionyl aminopeptidase 2                                                           |
| 0,676424116 | 0,12395 | 0,600818025 | 0,00001 | METAP2     | methionyl aminopeptidase 2                                                           |
| 0,772175133 | 0,15649 | 0,684441907 | 0,00018 | METAP2     | methionyl aminopeptidase 2                                                           |
| 0,773782497 | 0,05416 | 0,888842681 | 0,01395 | METTL13    | methyltransferase like 13                                                            |
| 0,73153561  | 0,11951 | 0,771640088 | 0,00122 | METTL14    | methyltransferase like 14                                                            |
| 0,873572896 | 0,42693 | 0,811127156 | 0,0011  | METTL14    | methyltransferase like 14                                                            |
| 1,051172909 | 0,58979 | 1,159899655 | 0,01504 | METTL17    | methyltransferase like 17                                                            |
| 0,952637998 | 0,74241 | 1,117287138 | 0,01767 | METTL17    | methyltransferase like 17                                                            |
| 0,918276162 | 0,47144 | 1,114966219 | 0,02215 | METTL17    | methyltransferase like 17                                                            |
| 1,191682575 | 0,07923 | 1,160703914 | 0,0202  | METTL20    | methyltransferase like 20                                                            |
| 0,69640574  | 0,1854  | 0,697855382 | 0,00152 | METTL21D   | methyltransferase like 21D                                                           |
| 1,021012126 | 0,84085 | 0,806082831 | 0,00296 | METTL21D   | methyltransferase like 21D                                                           |
| 0,907519155 | 0,50588 | 0,872967591 | 0,02446 | METTL2B    | methyltransferase like 2B                                                            |
| 0,891310496 | 0,33647 | 0,864537231 | 0,00353 | METTL9     | methyltransferase like 9                                                             |
| 0,819604608 | 0,31564 | 0,724973416 | 0,01862 | METTL9     | methyltransferase like 9                                                             |
| 1,200803427 | 0,18036 | 1,174461971 | 0,01582 | MEX3C      | mex-3 homolog C (C. elegans)                                                         |
| 0,825877665 | 0,41551 | 0,713012859 | 0,00263 | MEX3C      | mex-3 homolog C (C. elegans)                                                         |
| 1,195819797 | 0,18233 | 1,245737416 | 0,00923 | MEX3C      | mex-3 homolog C (C. elegans)                                                         |
| 0,952637998 | 0,61251 | 0,85797053  | 0,04481 | MEX3D      | mex-3 homolog D (C. elegans)                                                         |
| 1,105730653 | 0,7214  | 1,353786279 | 0,0154  | MFAP2      | microfibrillar-associated protein 2                                                  |
| 0,630251696 | 0,15595 | 0,52268005  | 0,00008 | MFAP3L     | microfibrillar-associated protein 3-like                                             |
| 0,875998315 | 0,4384  | 1,300440147 | 0,02092 | MFAP4      | microfibrillar-associated protein 4                                                  |
| 1,074004472 | 0,53693 | 1,172834949 | 0,0276  | MFF        | mitochondrial fission factor                                                         |
| 0,951318276 | 0,7313  | 1,25962998  | 0,02379 | MFGE8      | milk fat globule-EGF factor 8 protein                                                |
| 1,134455485 | 0,24874 | 0,906261938 | 0,02033 | MF12       | antigen p97 (melanoma associated) identified by monoclonal antibodies 133.2 and 96.5 |
| 0,721964598 | 0,11775 | 0,725476104 | 0,00098 | MFN1       | mitofusin 1                                                                          |
| 0,745872013 | 0,08003 | 0,808320869 | 0,04512 | MFN1       | mitofusin 1                                                                          |
| 1,439931319 | 0,06448 | 1,333298677 | 0,00011 | MFNG       | MFNG O-fucosylpeptide 3-beta-N-acetylglucosaminyltransferase                         |
| 1,076986376 | 0,39018 | 1,122721422 | 0,01308 | MFNG       | MFNG O-fucosylpeptide 3-beta-N-acetylglucosaminyltransferase                         |
| 0,782411782 | 0,0853  | 0,760489377 | 0,00044 | MFS1       | major facilitator superfamily domain containing 1                                    |
| 0,988970916 | 0,92694 | 0,792784137 | 0,0058  | MFS1       | major facilitator superfamily domain containing 1                                    |
| 0,597908988 | 0,07331 | 0,668963777 | 0,00223 | MGA        | MAX gene associated                                                                  |
| 1,303147149 | 0,05973 | 1,172834949 | 0,03799 | MGAM       | maltase-glucoamylase (alpha-glucosidase)                                             |
| 1,496922987 | 0,05967 | 1,351910833 | 0,00782 | MGAT1      | mannosyl (alpha-1,3-)-glycoprotein beta-1,2-N-acetylglucosaminyltransferase          |

|             |         |             |         |            |                                                                                                 |
|-------------|---------|-------------|---------|------------|-------------------------------------------------------------------------------------------------|
| 1,116512962 | 0,24404 | 1,184271612 | 0,00456 | MGAT4A     | mannosyl (alpha-1,3-)-glycoprotein beta-1,4-N-acetylglucosaminyltransferase, isozyme A          |
| 1,193335743 | 0,08869 | 1,103433774 | 0,0428  | MGAT5B     | mannosyl (alpha-1,6-)-glycoprotein beta-1,6-N-acetylglucosaminyltransferase, isozyme B          |
| 1,041021598 | 0,7297  | 1,164733586 | 0,02271 | MGC16121   | hypothetical protein MGC16121                                                                   |
| 1,146312186 | 0,08861 | 1,25092908  | 0,00195 | MGC16703   | tubulin, alpha pseudogene                                                                       |
| 0,957935218 | 0,64427 | 0,89688816  | 0,01963 | MGC27345   | hypothetical protein MGC27345                                                                   |
| 0,756808396 | 0,06212 | 0,842062954 | 0,00402 | MGC2752    | hypothetical LOC65996                                                                           |
| 1,160703914 | 0,11127 | 1,171210181 | 0,00844 | MGC2889    | hypothetical protein MGC2889                                                                    |
| 1,155886707 | 0,21816 | 1,240567298 | 0,00017 | MGC34034   | hypothetical protein MGC34034                                                                   |
| 1,139183377 | 0,16334 | 1,204972315 | 0,00727 | MGC39584   | hypothetical LOC441058                                                                          |
| 1,065846736 | 0,41758 | 1,146312186 | 0,01919 | MGC4473    | hypothetical LOC79100                                                                           |
| 1,002776436 | 0,98219 | 1,245737416 | 0,00026 | MGC45922   | hypothetical LOC284365                                                                          |
| 1,0132569   | 0,87237 | 1,221793102 | 0,00242 | MGC57346   | hypothetical LOC401884                                                                          |
| 1,333298677 | 0,21189 | 1,581178233 | 0,00894 | MGP        | matrix Gla protein                                                                              |
| 0,741233505 | 0,16266 | 0,754190038 | 0,00784 | MIB1       | mindbomb homolog 1 (Drosophila)                                                                 |
| 0,91319825  | 0,69753 | 0,801625329 | 0,01717 | MIB1       | mindbomb homolog 1 (Drosophila)                                                                 |
| 0,832198735 | 0,36042 | 0,726986259 | 0,02423 | MIB1       | mindbomb homolog 1 (Drosophila)                                                                 |
| 0,951318276 | 0,88877 | 0,753667455 | 0,00238 | MIB1       | mindbomb homolog 1 (Drosophila)                                                                 |
| 0,778085177 | 0,08412 | 0,670821112 | 0,00006 | MIB2       | mindbomb homolog 2 (Drosophila)                                                                 |
| 1,124278924 | 0,43852 | 1,185092771 | 0,01349 | MICAL3     | microtubule associated monooxygenase, calponin and LIM domain containing 3                      |
| 1,004167543 | 0,95201 | 1,169587664 | 0,01311 | MICAL3     | microtubule associated monooxygenase, calponin and LIM domain containing 3                      |
| 0,698823486 | 0,05452 | 0,808320869 | 0,00791 | MICAL1     | MICAL-like 1                                                                                    |
| 0,865736566 | 0,32806 | 1,130530567 | 0,03002 | MICU1      | mitochondrial calcium uptake 1                                                                  |
| 0,888842681 | 0,18111 | 0,874784765 | 0,00521 | MID2       | midline 2                                                                                       |
| 0,917004043 | 0,54609 | 0,806082831 | 0,01833 | MIER1      | mesoderm induction early response 1 homolog (Xenopus laevis)                                    |
| 0,885767519 | 0,52439 | 0,847332435 | 0,03083 | MIER1      | mesoderm induction early response 1 homolog (Xenopus laevis)                                    |
| 1,105730653 | 0,39114 | 1,2397077   | 0,00391 | MIER2      | mesoderm induction early response 1, family member 2                                            |
| 1,199139914 | 0,10634 | 1,257013375 | 0,00453 | MIER2      | mesoderm induction early response 1, family member 2                                            |
| 0,855002178 | 0,48193 | 0,790970018 | 0,04668 | MIER3      | mesoderm induction early response 1, family member 3                                            |
| 0,877821798 | 0,52623 | 0,712518807 | 0,00016 | MIER3      | mesoderm induction early response 1, family member 3                                            |
| 0,875998315 | 0,56972 | 0,671286251 | 0,00367 | MIER3      | mesoderm induction early response 1, family member 3                                            |
| 0,999307093 | 0,99528 | 1,17772279  | 0,00837 | MIIP       | migration and invasion inhibitory protein                                                       |
| 0,986916546 | 0,89728 | 0,891928519 | 0,03773 | MINA       | MYC induced nuclear antigen                                                                     |
| 0,61429349  | 0,05542 | 0,736623843 | 0,026   | MINK1      | misshapen-like kinase 1                                                                         |
| 0,890075733 | 0,51301 | 0,659573955 | 0,00185 | MIOS       | missing oocyte, meiosis regulator, homolog (Drosophila)                                         |
| 1,048262476 | 0,60744 | 1,096571589 | 0,03284 | MIPOLL1    | mirror-image polydactyly 1                                                                      |
| 1,395710764 | 0,05486 | 1,561572985 | 0,00001 | MIR143HG   | MIR143 host gene (non-protein coding)                                                           |
| 0,898132373 | 0,60226 | 0,863938187 | 0,03245 | MIR17HG    | miR-17-92 cluster host gene (non-protein coding)                                                |
| 0,807760778 | 0,06561 | 0,887611337 | 0,04546 | MIR600HG   | MIR600 host gene (non-protein coding)                                                           |
| 1,053361036 | 0,57719 | 1,185092771 | 0,01312 | MIRLET7BHG | MIRLET7B host gene (non-protein coding)                                                         |
| 0,933679945 | 0,43239 | 0,790041312 | 0,03361 | MIS18A     | MIS18 kinetochore protein homolog A (S. pombe)                                                  |
| 0,788400174 | 0,14738 | 0,768970416 | 0,00333 | MIS18BP1   | MIS18 binding protein 1                                                                         |
| 0,933032992 | 0,39522 | 1,195819797 | 0,00413 | MKI67      | antigen identified by monoclonal antibody Ki-67                                                 |
| 0,836826243 | 0,21703 | 0,771640088 | 0,00001 | MKI67IP    | MKI67 (FHA domain) interacting nucleolar phosphoprotein                                         |
| 0,775930854 | 0,05189 | 0,873572896 | 0,02422 | MKKS       | McKusick-Kaufman syndrome                                                                       |
| 1,010451446 | 0,94332 | 0,847919965 | 0,03255 | MKL1       | megakaryoblastic leukemia (translocation) 1                                                     |
| 1,036701101 | 0,74011 | 0,8962667   | 0,02207 | MKL2       | MKL/myocardin-like 2                                                                            |
| 0,971980988 | 0,86736 | 0,830470024 | 0,017   | MKNK1      | MAP kinase interacting serine/threonine kinase 1                                                |
| 1,049716684 | 0,80225 | 0,860352631 | 0,02544 | MKRN1      | makorin ring finger protein 1                                                                   |
| 0,981459064 | 0,8972  | 0,859756486 | 0,00289 | MKRN2      | makorin ring finger protein 2                                                                   |
| 1,048989328 | 0,54293 | 0,906890329 | 0,01553 | MKRN3      | makorin ring finger protein 3                                                                   |
| 1,146312186 | 0,12861 | 1,118837101 | 0,03858 | MKS1       | Meckel syndrome, type 1                                                                         |
| 0,971307496 | 0,91744 | 1,174461971 | 0,0412  | MLEC       | malectin                                                                                        |
| 1,30224419  | 0,14417 | 1,383190629 | 0,00057 | MLEC       | malectin                                                                                        |
| 1,083725967 | 0,64409 | 0,752101876 | 0,00029 | MLF1       | myeloid leukemia factor 1                                                                       |
| 0,696888619 | 0,07921 | 0,607518396 | 0       | MLF1IP     | MLF1 interacting protein                                                                        |
| 0,999307093 | 0,99477 | 1,121943481 | 0,04561 | MLH3       | mutL homolog 3 (E. coli)                                                                        |
| 0,771640088 | 0,12559 | 0,709561678 | 0,00013 | MLIP       | muscular LMNA-interacting protein                                                               |
| 0,91383145  | 0,26169 | 0,888226796 | 0,02281 | MLL        | myeloid/lymphoid or mixed-lineage leukemia (trithorax homolog, Drosophila)                      |
| 1,160703914 | 0,1518  | 1,17772279  | 0,00542 | MLL        | myeloid/lymphoid or mixed-lineage leukemia (trithorax homolog, Drosophila)                      |
| 0,999307093 | 0,99776 | 1,21335356  | 0,01357 | MLL        | myeloid/lymphoid or mixed-lineage leukemia (trithorax homolog, Drosophila)                      |
| 0,77271055  | 0,37984 | 0,71449707  | 0,00782 | MLL3       | myeloid/lymphoid or mixed-lineage leukemia 3                                                    |
| 0,885153765 | 0,66073 | 0,873572896 | 0,02228 | MLL3       | myeloid/lymphoid or mixed-lineage leukemia 3                                                    |
| 0,830470024 | 0,4062  | 0,815072332 | 0,00303 | MLL3       | myeloid/lymphoid or mixed-lineage leukemia 3                                                    |
| 0,740206649 | 0,52573 | 0,846158597 | 0,0171  | MLL5       | myeloid/lymphoid or mixed-lineage leukemia 5 (trithorax homolog, Drosophila)                    |
| 0,817902059 | 0,41723 | 0,796088099 | 0,00149 | MLL5       | myeloid/lymphoid or mixed-lineage leukemia 5 (trithorax homolog, Drosophila)                    |
| 0,89564567  | 0,64148 | 0,829894586 | 0,0396  | MLL5       | myeloid/lymphoid or mixed-lineage leukemia 5 (trithorax homolog, Drosophila)                    |
| 0,863938187 | 0,09681 | 0,873572896 | 0,00892 | MLLT1      | myeloid/lymphoid or mixed-lineage leukemia (trithorax homolog, Drosophila); translocated to, 1  |
| 0,571965487 | 0,08673 | 0,688247801 | 0,00225 | MLLT10     | myeloid/lymphoid or mixed-lineage leukemia (trithorax homolog, Drosophila); translocated to, 10 |
| 0,736113431 | 0,14852 | 0,78132788  | 0,03041 | MLLT10     | myeloid/lymphoid or mixed-lineage leukemia (trithorax homolog, Drosophila); translocated to, 10 |
| 0,898132373 | 0,53911 | 0,791685866 | 0,00026 | MLLT10     | myeloid/lymphoid or mixed-lineage leukemia (trithorax homolog, Drosophila); translocated to, 10 |
| 0,764718139 | 0,06839 | 0,67877249  | 0,00168 | MLLT4      | myeloid/lymphoid or mixed-lineage leukemia (trithorax homolog, Drosophila); translocated to, 4  |
| 1,155886707 | 0,05577 | 1,25962998  | 0,00074 | MLLT6      | myeloid/lymphoid or mixed-lineage leukemia (trithorax homolog, Drosophila); translocated to, 6  |
| 1,0453601   | 0,58413 | 1,159899655 | 0,04056 | MLPH       | melanophilin                                                                                    |
| 1,215036792 | 0,29904 | 1,348167732 | 0,00208 | MLXIP      | MLX interacting protein                                                                         |
| 1,350037985 | 0,08502 | 1,208317843 | 0,01427 | MLXIP      | MLX interacting protein                                                                         |
| 1,257884972 | 0,13937 | 1,370782805 | 0,00196 | MLXIP      | MLX interacting protein                                                                         |
| 0,819604608 | 0,17344 | 0,866336856 | 0,00842 | MMAA       | methylmalonic aciduria (cobalamin deficiency) cblA type                                         |
| 0,955945318 | 0,70919 | 0,854409741 | 0,00312 | MMAA       | methylmalonic aciduria (cobalamin deficiency) cblA type                                         |
| 0,732042848 | 0,10484 | 0,784040454 | 0,00825 | MMAA       | methylmalonic aciduria (cobalamin deficiency) cblA type                                         |
| 1,602139755 | 0,05431 | 1,125838586 | 0,04945 | MMD        | monocyte to macrophage differentiation-associated                                               |
| 0,990342872 | 0,89744 | 1,094293701 | 0,04286 | MMEL1      | membrane metallo-endopeptidase-like 1                                                           |
| 2,229932437 | 0,08872 | 1,980685744 | 0,01304 | MMP13      | matrix metalloproteinase 13 (collagenase 3)                                                     |
| 1,316766922 | 0,06358 | 1,460032011 | 0,00024 | MMP14      | matrix metalloproteinase 14 (membrane-inserted)                                                 |
| 1,076986376 | 0,49968 | 1,163120042 | 0,01902 | MMP16      | matrix metalloproteinase 16 (membrane-inserted)                                                 |
| 1,014662547 | 0,93663 | 1,32408891  | 0,0108  | MMP19      | matrix metalloproteinase 19                                                                     |
| 1,004167543 | 0,98785 | 1,605474777 | 0,00128 | MMP2       | matrix metalloproteinase 2 (gelatinase A, 72kDa gelatinase, 72kDa type IV collagenase)          |
| 1,399585866 | 0,19753 | 1,689972769 | 0,00011 | MMP28      | matrix metalloproteinase 28                                                                     |
| 1,217566019 | 0,23654 | 1,729074463 | 0       | MMP28      | matrix metalloproteinase 28                                                                     |
| 1,327765158 | 0,07403 | 1,412254404 | 0,00001 | MMP28      | matrix metalloproteinase 28                                                                     |
| 1,224336392 | 0,13633 | 1,235418637 | 0,00479 | MMP28      | matrix metalloproteinase 28                                                                     |
| 1,147902414 | 0,34848 | 1,261377409 | 0,01792 | MMRN2      | multimerin 2                                                                                    |
| 1,121943481 | 0,24396 | 1,158292806 | 0,03862 | MMRN2      | multimerin 2                                                                                    |
| 1,427014506 | 0,05159 | 1,304050735 | 0,00529 | MMRN2      | multimerin 2                                                                                    |
| 0,964598185 | 0,66347 | 0,886381699 | 0,02212 | MND1       | meiotic nuclear divisions 1 homolog (S. cerevisiae)                                             |
| 0,888842681 | 0,40343 | 0,811127156 | 0,0004  | MNS1       | meiosis-specific nuclear structural 1                                                           |
| 0,787853886 | 0,11887 | 0,789493887 | 0,0002  | MNT        | MAX binding protein                                                                             |
| 1,387030969 | 0,17334 | 1,418140036 | 0,002   | MOBKL2A    | MOB1, Mps One Binder kinase activator-like 2A (yeast)                                           |
| 0,832775771 | 0,33128 | 0,717474767 | 0,00072 | MOBKL2B    | MOB1, Mps One Binder kinase activator-like 2B (yeast)                                           |
| 1,199139914 | 0,30093 | 1,439931319 | 0,00024 | MOCS1      | molybdenum cofactor synthesis 1                                                                 |
| 0,868742185 | 0,30381 | 0,890075733 | 0,02893 | MOCS2      | molybdenum cofactor synthesis 2                                                                 |
| 1,019597683 | 0,80594 | 0,847332435 | 0,01009 | MOCS2      | molybdenum cofactor synthesis 2                                                                 |
| 1,086734863 | 0,45442 | 1,106497353 | 0,03906 | MOGAT1     | monoacylglycerol O-acyltransferase 1                                                            |
| 1,155085785 | 0,16068 | 1,124278924 | 0,01878 | MOGAT2     | monoacylglycerol O-acyltransferase 2                                                            |
| 1,163120042 | 0,11424 | 1,169587664 | 0,02178 | MOGAT2     | monoacylglycerol O-acyltransferase 2                                                            |

|             |         |             |         |          |                                                                                                                                          |
|-------------|---------|-------------|---------|----------|------------------------------------------------------------------------------------------------------------------------------------------|
| 1,348167732 | 0,15095 | 1,313121125 | 0,00221 | MOGS     | mannosyl-oligosaccharide glucosidase                                                                                                     |
| 0,947370071 | 0,52891 | 1,121943481 | 0,03386 | MOK      | MOK protein kinase                                                                                                                       |
| 0,838568184 | 0,27118 | 0,865136691 | 0,03136 | MON1B    | MON1 homolog B (yeast)                                                                                                                   |
| 0,965267025 | 0,75169 | 1,137605228 | 0,03819 | MON1B    | MON1 homolog B (yeast)                                                                                                                   |
| 0,844400887 | 0,37412 | 0,813943185 | 0,0357  | MORC3    | MORC family CW-type zinc finger 3                                                                                                        |
| 1,275444392 | 0,42971 | 0,844986384 | 0,02997 | MORF4L2  | mortality factor 4 like 2                                                                                                                |
| 1,084477409 | 0,40444 | 1,210833084 | 0,00003 | MORN1    | MORN repeat containing 1                                                                                                                 |
| 0,863938187 | 0,0565  | 0,794985251 | 0,01091 | MORN2    | MORN repeat containing 2                                                                                                                 |
| 1,123499903 | 0,18009 | 1,194991205 | 0,01084 | MORN4    | MORN repeat containing 4                                                                                                                 |
| 1,161508732 | 0,23617 | 1,150291893 | 0,00762 | MOS      | v-mos Moloney murine sarcoma viral oncogene homolog                                                                                      |
| 1,043188594 | 0,58187 | 1,127400412 | 0,04966 | MOSC1    | MOCO sulphurase C-terminal domain containing 1                                                                                           |
| 1,368883813 | 0,05336 | 1,159899655 | 0,04399 | MOSC2    | MOCO sulphurase C-terminal domain containing 2                                                                                           |
| 0,728499557 | 0,21371 | 0,72597914  | 0,04208 | MOSPD1   | motile sperm domain containing 1                                                                                                         |
| 0,854409741 | 0,49459 | 0,792234811 | 0,0083  | MOSPD1   | motile sperm domain containing 1                                                                                                         |
| 1,140763716 | 0,13466 | 1,197478705 | 0,00068 | MOV10L1  | Mov10l1, Moloney leukemia virus 10-like 1, homolog (mouse)                                                                               |
| 0,964598185 | 0,87476 | 1,182631    | 0,02519 | MPG      | N-methylpurine-DNA glycosylase                                                                                                           |
| 0,718968266 | 0,32185 | 0,747942879 | 0,00058 | MPHOSPH8 | M-phase phosphoprotein 8                                                                                                                 |
| 1,184271612 | 0,06179 | 1,16634937  | 0,02286 | MPHOSPH9 | M-phase phosphoprotein 9                                                                                                                 |
| 1,346300069 | 0,09637 | 1,169587664 | 0,02357 | MPHOSPH9 | M-phase phosphoprotein 9                                                                                                                 |
| 1,01395948  | 0,89038 | 1,208317843 | 0,00642 | MPHOSPH9 | M-phase phosphoprotein 9                                                                                                                 |
| 1,209155676 | 0,05188 | 1,207480591 | 0,00846 | MPI      | mannose phosphate isomerase                                                                                                              |
| 1,065846736 | 0,65947 | 1,203303026 | 0,00306 | MPP1     | membrane protein, palmitoylated 1, 55kDa                                                                                                 |
| 0,87417862  | 0,341   | 0,872967591 | 0,01492 | MPP4     | membrane protein, palmitoylated 4 (MAGUK p55 subfamily member 4)                                                                         |
| 0,989656656 | 0,95565 | 0,847919965 | 0,00132 | MPP5     | membrane protein, palmitoylated 5 (MAGUK p55 subfamily member 5)                                                                         |
| 1,057570964 | 0,43048 | 1,125058485 | 0,04395 | MPRIIP   | myosin phosphatase Rho interacting protein                                                                                               |
| 0,968618189 | 0,87685 | 1,138394029 | 0,03358 | MPV17    | MpV17 mitochondrial inner membrane protein                                                                                               |
| 1,219255094 | 0,09556 | 1,278099363 | 0,00369 | MPV17L   | MPV17 mitochondrial membrane protein-like                                                                                                |
| 1,181811547 | 0,1988  | 1,150291893 | 0,01854 | MPV17L2  | MPV17 mitochondrial membrane protein-like 2                                                                                              |
| 1,132098902 | 0,19525 | 1,246601194 | 0,00112 | MR1      | major histocompatibility complex, class I-related                                                                                        |
| 1,053361036 | 0,52372 | 1,17609125  | 0,00075 | MR1      | major histocompatibility complex, class I-related                                                                                        |
| 1,041743429 | 0,66772 | 1,136816973 | 0,01592 | MRAP     | melanocortin 2 receptor accessory protein                                                                                                |
| 1,142346247 | 0,28015 | 1,436940177 | 0,00028 | MRC2     | mannose receptor, C type 2                                                                                                               |
| 0,846158597 | 0,22796 | 0,87175824  | 0,00747 | MRE11A   | MRE11 meiotic recombination 11 homolog A ( <i>S. cerevisiae</i> )                                                                        |
| 0,730016005 | 0,0734  | 0,643048742 | 0,00026 | MREG     | melanoregulin                                                                                                                            |
| 0,692554734 | 0,10785 | 0,641712949 | 0,00091 | MREG     | melanoregulin                                                                                                                            |
| 1,313121125 | 0,18628 | 1,459020344 | 0,00345 | MRGPRF   | MAS-related GPR, member F                                                                                                                |
| 1,167158102 | 0,15809 | 1,145517898 | 0,00923 | MR1      | methylthioribose-1-phosphate isomerase homolog ( <i>S. cerevisiae</i> )                                                                  |
| 0,863938187 | 0,16156 | 0,827023368 | 0,00027 | MRP63    | mitochondrial ribosomal protein 63                                                                                                       |
| 0,792784137 | 0,07407 | 0,852634892 | 0,00472 | MRP63    | mitochondrial ribosomal protein 63                                                                                                       |
| 0,802737389 | 0,28198 | 0,89688816  | 0,02237 | MRPL17   | mitochondrial ribosomal protein L17                                                                                                      |
| 0,742261785 | 0,11023 | 0,854409741 | 0,02666 | MRPL18   | mitochondrial ribosomal protein L18                                                                                                      |
| 0,771640088 | 0,05372 | 0,61813763  | 0,00001 | MRPL19   | mitochondrial ribosomal protein L19                                                                                                      |
| 0,899378312 | 0,22667 | 0,848507902 | 0,01482 | MRPL20   | mitochondrial ribosomal protein L20                                                                                                      |
| 0,91383145  | 0,26862 | 0,897510051 | 0,02226 | MRPL30   | mitochondrial ribosomal protein L30                                                                                                      |
| 0,743806881 | 0,08002 | 0,822450069 | 0,03195 | MRPL30   | mitochondrial ribosomal protein L30                                                                                                      |
| 0,772175133 | 0,15226 | 0,744838732 | 0,00003 | MRPL30   | mitochondrial ribosomal protein L30                                                                                                      |
| 0,982139595 | 0,81521 | 0,910669834 | 0,01745 | MRPL33   | mitochondrial ribosomal protein L33                                                                                                      |
| 0,793883931 | 0,17409 | 0,734584317 | 0,00532 | MRPL42   | mitochondrial ribosomal protein L42                                                                                                      |
| 0,737134609 | 0,07536 | 0,887611337 | 0,00962 | MRPL45   | mitochondrial ribosomal protein L45                                                                                                      |
| 0,931740429 | 0,43673 | 0,911933166 | 0,0458  | MRPL46   | mitochondrial ribosomal protein L46                                                                                                      |
| 0,782954296 | 0,16674 | 0,738157203 | 0,01618 | MRPL50   | mitochondrial ribosomal protein L50                                                                                                      |
| 0,828744904 | 0,25285 | 0,780786493 | 0,00259 | MRPL50   | mitochondrial ribosomal protein L50                                                                                                      |
| 0,943438251 | 0,52808 | 0,872362706 | 0,01316 | MRPL9    | mitochondrial ribosomal protein L9                                                                                                       |
| 0,855002178 | 0,44926 | 0,87175824  | 0,03215 | MRPL9    | mitochondrial ribosomal protein L9                                                                                                       |
| 0,879039561 | 0,44677 | 0,798851916 | 0,00277 | MRPS10   | mitochondrial ribosomal protein S10                                                                                                      |
| 0,691116103 | 0,11211 | 0,76154437  | 0,02243 | MRPS10   | mitochondrial ribosomal protein S10                                                                                                      |
| 0,624165274 | 0,13656 | 0,744838732 | 0,03629 | MRPS10   | mitochondrial ribosomal protein S10                                                                                                      |
| 0,76950361  | 0,10131 | 0,763129604 | 0,00131 | MRPS11   | mitochondrial ribosomal protein S11                                                                                                      |
| 0,963929808 | 0,73765 | 0,821880187 | 0,01399 | MRPS12   | mitochondrial ribosomal protein S12                                                                                                      |
| 0,982139595 | 0,87662 | 0,863339559 | 0,02817 | MRPS12   | mitochondrial ribosomal protein S12                                                                                                      |
| 0,933032992 | 0,61267 | 0,755759964 | 0,01027 | MRPS15   | mitochondrial ribosomal protein S15                                                                                                      |
| 0,893165852 | 0,1953  | 0,835666959 | 0,00024 | MRPS18B  | mitochondrial ribosomal protein S18B                                                                                                     |
| 0,934975198 | 0,55586 | 0,826450318 | 0,00066 | MRPS22   | mitochondrial ribosomal protein S22                                                                                                      |
| 0,829894586 | 0,0614  | 0,804966138 | 0,00017 | MRPS22   | mitochondrial ribosomal protein S22                                                                                                      |
| 0,96727633  | 0,68761 | 0,821880187 | 0,00139 | MRPS23   | mitochondrial ribosomal protein S23                                                                                                      |
| 0,74277646  | 0,18506 | 0,612168196 | 0,00007 | MRPS25   | mitochondrial ribosomal protein S25                                                                                                      |
| 0,884540435 | 0,17774 | 0,816203046 | 0,00561 | MRPS30   | mitochondrial ribosomal protein S30                                                                                                      |
| 0,812523996 | 0,11048 | 0,840313752 | 0,00176 | MRPS35   | mitochondrial ribosomal protein S35                                                                                                      |
| 0,912565489 | 0,51375 | 0,815072332 | 0,00752 | MRPS5    | mitochondrial ribosomal protein S5                                                                                                       |
| 1,066585781 | 0,5644  | 0,87417862  | 0,03138 | MRPS5    | mitochondrial ribosomal protein S5                                                                                                       |
| 0,937571096 | 0,7349  | 0,715984371 | 0,00032 | MRS2     | MRS2 magnesium homeostasis factor homolog ( <i>S. cerevisiae</i> )                                                                       |
| 0,713012859 | 0,05192 | 0,774855931 | 0,00064 | MRTO4    | mRNA turnover 4 homolog ( <i>S. cerevisiae</i> )                                                                                         |
| 1,343503426 | 0,07585 | 1,437936533 | 0,00043 | MRV1     | murine retrovirus integration site 1 homolog                                                                                             |
| 1,133669413 | 0,24338 | 1,165541198 | 0,01022 | MS4A5    | membrane-spanning 4-domains, subfamily A, member 5                                                                                       |
| 1,381274448 | 0,08463 | 1,293248932 | 0,01727 | MS4A7    | membrane-spanning 4-domains, subfamily A, member 7                                                                                       |
| 1,51887169  | 0,12815 | 1,209155676 | 0,04812 | MSI2     | musashi homolog 2 ( <i>Drosophila</i> )                                                                                                  |
| 0,808881348 | 0,16658 | 0,899378312 | 0,04441 | MSL1     | male-specific lethal 1 homolog ( <i>Drosophila</i> )                                                                                     |
| 0,735093668 | 0,1735  | 0,768437591 | 0,001   | MSMO1    | methylsterol monoxygenase 1                                                                                                              |
| 1,027401439 | 0,81902 | 1,167967395 | 0,02836 | MSN      | moesin                                                                                                                                   |
| 1,051172909 | 0,68196 | 1,219255094 | 0,00405 | MSRB2    | methionine sulfoxide reductase B2                                                                                                        |
| 0,920187651 | 0,535   | 1,159899655 | 0,03935 | MSRB3    | methionine sulfoxide reductase B3                                                                                                        |
| 1,173648178 | 0,24728 | 1,194991205 | 0,02916 | MSRB3    | methionine sulfoxide reductase B3                                                                                                        |
| 1,035982764 | 0,70786 | 1,172834949 | 0,01094 | MSRB3    | methionine sulfoxide reductase B3                                                                                                        |
| 0,857376037 | 0,13566 | 1,118837101 | 0,04716 | MST1     | macrophage stimulating 1 (hepatocyte growth factor-like)                                                                                 |
| 0,818469182 | 0,43952 | 0,772175133 | 0,00494 | MST4     | serine/threonine protein kinase MST4                                                                                                     |
| 0,928516852 | 0,54352 | 1,241427492 | 0,0018  | MT1F     | metallothionein 1F                                                                                                                       |
| 1,017479692 | 0,90753 | 1,278099363 | 0,04188 | MTA1     | metastasis associated 1                                                                                                                  |
| 0,940826108 | 0,73167 | 0,664803554 | 0,00016 | MTAP     | methylthioadenosine phosphorylase                                                                                                        |
| 1,151887642 | 0,24894 | 1,199971382 | 0,01831 | MTAP     | methylthioadenosine phosphorylase                                                                                                        |
| 0,700763725 | 0,11514 | 0,829894586 | 0,01232 | MTCH2    | mitochondrial carrier 2                                                                                                                  |
| 0,85797053  | 0,05354 | 0,839731493 | 0,00021 | MTCP1NB  | mature T-cell proliferation 1 neighbor                                                                                                   |
| 0,91383145  | 0,20055 | 0,835087919 | 0,00006 | MTCP1NB  | mature T-cell proliferation 1 neighbor                                                                                                   |
| 0,885153765 | 0,48386 | 0,865136691 | 0,02084 | MTDH     | metadherin                                                                                                                               |
| 0,952637998 | 0,83098 | 0,7944344   | 0,03413 | MTDH     | metadherin                                                                                                                               |
| 0,856188285 | 0,05055 | 0,831045862 | 0,00422 | MTERF    | mitochondrial transcription termination factor                                                                                           |
| 0,788400174 | 0,13553 | 0,774855931 | 0,00045 | MTERF1   | MTERF domain containing 1                                                                                                                |
| 0,715984371 | 0,09554 | 0,824162085 | 0,00478 | MTF1     | metal-regulatory transcription factor 1                                                                                                  |
| 0,78024548  | 0,36105 | 0,798851916 | 0,0029  | MTF2     | metal response element binding transcription factor 2                                                                                    |
| 0,839149637 | 0,41264 | 0,819036698 | 0,02449 | MTF2     | metal response element binding transcription factor 2                                                                                    |
| 1,118061851 | 0,60542 | 0,832198735 | 0,01512 | MTF2     | metal response element binding transcription factor 2                                                                                    |
| 0,995159722 | 0,96075 | 0,792234811 | 0,01056 | MTFMT    | mitochondrial methionyl-tRNA formyltransferase                                                                                           |
| 0,823020345 | 0,15014 | 0,729004689 | 0,00043 | MTRF1    | mitochondrial fission regulator 1                                                                                                        |
| 0,78024548  | 0,15814 | 0,773782497 | 0,00063 | MTRF1    | mitochondrial fission regulator 1                                                                                                        |
| 0,802181166 | 0,06478 | 0,842062954 | 0,00119 | MTHFD1   | methylenetetrahydrofolate dehydrogenase (NADP+ dependent) 1, methylenetetrahydrofolate cyclohydrolase, formyltetrahydrofolate synthetase |

|             |         |             |         |         |                                                                                    |
|-------------|---------|-------------|---------|---------|------------------------------------------------------------------------------------|
| 1,076986376 | 0,31886 | 0,898755127 | 0,02179 | MTHFD2L | methylenetetrahydrofolate dehydrogenase (NADP+ dependent) 2-like                   |
| 0,812252396 | 0,39897 | 0,674551267 | 0,00031 | MTHFD2L | methylenetetrahydrofolate dehydrogenase (NADP+ dependent) 2-like                   |
| 1,181811547 | 0,17407 | 1,258757174 | 0,00026 | MTHFR   | methylenetetrahydrofolate reductase (NAD(P)H)                                      |
| 0,949342121 | 0,61791 | 0,811127156 | 0,003   | MTHFR   | methylenetetrahydrofolate reductase (NAD(P)H)                                      |
| 0,988285652 | 0,9161  | 0,849648999 | 0,04076 | MTM1    | myotubularin 1                                                                     |
| 0,737645729 | 0,19603 | 0,671286251 | 0,00038 | MTM1    | myotubularin 1                                                                     |
| 0,754712984 | 0,16113 | 0,765248385 | 0,0027  | MTMR12  | myotubularin related protein 12                                                    |
| 0,752101876 | 0,17901 | 0,77916458  | 0,00014 | MTMR2   | myotubularin related protein 2                                                     |
| 0,882702996 | 0,25896 | 0,909408252 | 0,02644 | MTMR3   | myotubularin related protein 3                                                     |
| 0,995849753 | 0,98485 | 0,865736566 | 0,01807 | MTMR6   | myotubularin related protein 6                                                     |
| 1,140763716 | 0,21197 | 1,108032348 | 0,03517 | MTMR8   | myotubularin related protein 8                                                     |
| 0,790589117 | 0,27245 | 0,778085177 | 0,00008 | MTMR9   | myotubularin related protein 9                                                     |
| 0,991716731 | 0,93714 | 0,893785162 | 0,01779 | MTNR1A  | melatonin receptor 1A                                                              |
| 0,73153561  | 0,12073 | 0,793333843 | 0,00359 | MTPAP   | mitochondrial poly(A) polymerase                                                   |
| 0,715984371 | 0,10512 | 0,673150035 | 0,00001 | MTPAP   | mitochondrial poly(A) polymerase                                                   |
| 0,573156093 | 0,11412 | 0,690637224 | 0,00992 | MTPAP   | mitochondrial poly(A) polymerase                                                   |
| 0,732550437 | 0,06233 | 0,85027416  | 0,00711 | MTRF1   | mitochondrial translational release factor 1                                       |
| 1,044635763 | 0,7102  | 0,870550563 | 0,02401 | MTRF1   | mitochondrial translational release factor 1                                       |
| 1,061423209 | 0,6996  | 0,89564567  | 0,03643 | MTRF1   | mitochondrial translational release factor 1                                       |
| 0,925304428 | 0,32163 | 0,929804943 | 0,03695 | MTRF1L  | mitochondrial translational release factor 1-like                                  |
| 0,97874165  | 0,89852 | 0,915099168 | 0,03034 | MTUS2   | microtubule associated tumor suppressor candidate 2                                |
| 1,093535457 | 0,19356 | 1,150291893 | 0,00451 | MTUS2   | microtubule associated tumor suppressor candidate 2                                |
| 0,821310701 | 0,11469 | 0,832775771 | 0,00695 | MTX2    | metaxin 2                                                                          |
| 0,883927531 | 0,54168 | 0,875998315 | 0,0413  | MTX3    | metaxin 3                                                                          |
| 0,97874165  | 0,82893 | 0,86154616  | 0,02715 | MUC13   | mucin 13, cell surface associated                                                  |
| 1,167967395 | 0,13797 | 1,155886707 | 0,007   | MUC13   | mucin 13, cell surface associated                                                  |
| 1,02313747  | 0,75778 | 1,191682575 | 0,01959 | MUC17   | mucin 17, cell surface associated                                                  |
| 1,41029796  | 0,06131 | 1,433955248 | 0,00389 | MUC20   | mucin 20, cell surface associated                                                  |
| 1,219255094 | 0,43517 | 1,400556321 | 0,00762 | MUC20   | mucin 20, cell surface associated                                                  |
| 1,148698355 | 0,07606 | 1,180174343 | 0,01072 | MUC4    | mucin 4, cell surface associated                                                   |
| 0,832198735 | 0,12182 | 0,837987135 | 0,00449 | MUC4    | mucin 4, cell surface associated                                                   |
| 1,152686347 | 0,10733 | 1,152686347 | 0,01816 | MUC6    | mucin 6, oligomeric mucus/gel-forming                                              |
| 1,083725967 | 0,5575  | 0,892546971 | 0,01923 | MUC7    | mucin 7, secreted                                                                  |
| 1,095052471 | 0,26241 | 1,163120042 | 0,00243 | MUC8    | mucin 8                                                                            |
| 0,819036998 | 0,22806 | 0,752101876 | 0,00464 | MUDENG  | MU-2/AP1M2 domain containing, death-inducing                                       |
| 0,781869643 | 0,26019 | 0,784584098 | 0,00045 | MUDENG  | MU-2/AP1M2 domain containing, death-inducing                                       |
| 0,732550437 | 0,16258 | 0,743291492 | 0,00039 | MUM1    | melanoma associated antigen (mutated) 1                                            |
| 0,910669834 | 0,57959 | 0,779704843 | 0,03481 | MUM1    | melanoma associated antigen (mutated) 1                                            |
| 1,087488391 | 0,41054 | 1,127400412 | 0,02636 | MUS81   | MUS81 endonuclease homolog (S. cerevisiae)                                         |
| 0,660211421 | 0,07067 | 0,71449707  | 0,00008 | MUT     | methylmalonyl CoA mutase                                                           |
| 0,67877249  | 0,05781 | 0,722465199 | 0,00061 | MUTED   | mutated homolog (mouse)                                                            |
| 1,067325338 | 0,59849 | 1,185092771 | 0,00099 | MUTYH   | mutY homolog (E. coli)                                                             |
| 1,015366101 | 0,88497 | 0,837987135 | 0,01803 | MVD     | mevalonate (diphospho) decarboxylase                                               |
| 0,78132788  | 0,0755  | 0,783497187 | 0,00809 | MVK     | mevalonate kinase                                                                  |
| 0,955945318 | 0,67158 | 1,140763716 | 0,02366 | MVK     | mevalonate kinase                                                                  |
| 1,004167543 | 0,98442 | 1,225185332 | 0,01604 | MVP     | major vault protein                                                                |
| 0,69495911  | 0,17186 | 0,767373048 | 0,04683 | MX1     | myxovirus (influenza virus) resistance 1, interferon-inducible protein p78 (mouse) |
| 0,816768991 | 0,23362 | 0,84323111  | 0,03936 | MXD1    | MAX dimerization protein 1                                                         |
| 1,060687741 | 0,67549 | 1,22858698  | 0,02277 | MXRA5   | matrix-remodelling associated 5                                                    |
| 1,217566019 | 0,30585 | 1,440929749 | 0,00125 | MXRA8   | matrix-remodelling associated 8                                                    |
| 1,142346247 | 0,18692 | 1,358486285 | 0,00007 | MYB11   | v-myb myeloblastosis viral oncogene homolog (avian)-like 1                         |
| 1,111879158 | 0,37976 | 1,189207115 | 0,04045 | MYB12   | v-myb myeloblastosis viral oncogene homolog (avian)-like 2                         |
| 0,948026965 | 0,55911 | 1,126619228 | 0,03888 | MYBPC2  | myosin binding protein C, fast type                                                |
| 0,917004043 | 0,58803 | 0,856781955 | 0,02191 | MYCBP   | c-myc binding protein                                                              |
| 0,817902059 | 0,07894 | 0,816768991 | 0,00901 | MYCBP   | c-myc binding protein                                                              |
| 1           | 0,99932 | 0,885767519 | 0,01272 | MYCBP   | c-myc binding protein                                                              |
| 0,493800431 | 0,12436 | 0,757858283 | 0,02199 | MYCBP2  | MYC binding protein 2                                                              |
| 0,683020128 | 0,16634 | 0,738669032 | 0,00033 | MYCBP2  | MYC binding protein 2                                                              |
| 0,630688704 | 0,05857 | 0,712518807 | 0,0002  | MYCBP2  | MYC binding protein 2                                                              |
| 1,158292806 | 0,09515 | 1,121166078 | 0,04845 | MYCNOS  | MYCN opposite strand/antisense RNA (non-protein coding)                            |
| 1,07997656  | 0,39327 | 1,122721422 | 0,01599 | MYCNOS  | MYCN opposite strand/antisense RNA (non-protein coding)                            |
| 0,885767519 | 0,36769 | 0,860352631 | 0,00597 | MYD88   | myeloid differentiation primary response gene (88)                                 |
| 0,742261785 | 0,11592 | 0,828744904 | 0,02138 | MYH14   | myosin, heavy chain 14, non-muscle                                                 |
| 1,106497353 | 0,3714  | 1,113421618 | 0,02304 | MYL7    | myosin, light chain 7, regulatory                                                  |
| 1,471206746 | 0,16294 | 1,956126947 | 0,00011 | MYL9    | myosin, light chain 9, regulatory                                                  |
| 1,180992661 | 0,09338 | 1,221793102 | 0,00469 | MYLK    | myosin light chain kinase                                                          |
| 1,137605228 | 0,15221 | 1,139973273 | 0,03707 | MYLK2   | myosin light chain kinase 2                                                        |
| 1,130530567 | 0,14687 | 1,164733586 | 0,00129 | MYLK4   | myosin light chain kinase family, member 4                                         |
| 1,198309021 | 0,05692 | 1,122721422 | 0,01531 | MYLPF   | myosin light chain, phosphorylatable, fast skeletal muscle                         |
| 0,932386486 | 0,65602 | 0,807760778 | 0,01582 | MYNN    | myoneurin                                                                          |
| 0,823020345 | 0,38939 | 0,829319546 | 0,00215 | MYNN    | myoneurin                                                                          |
| 1,156688184 | 0,52375 | 0,819036698 | 0,00727 | MYNN    | myoneurin                                                                          |
| 0,777007269 | 0,07792 | 0,833353207 | 0,00692 | MYO10   | myosin X                                                                           |
| 1,02313747  | 0,89202 | 1,246601194 | 0,00175 | MYO15B  | myosin XVb pseudogene                                                              |
| 1,154285418 | 0,26241 | 1,311302014 | 0,00043 | MYO15B  | myosin XVb pseudogene                                                              |
| 0,741233505 | 0,05895 | 0,627201102 | 0,00001 | MYO19   | myosin XIX                                                                         |
| 0,786217292 | 0,31082 | 0,747942879 | 0,00043 | MYO5A   | myosin VA (heavy chain 12, myosin)                                                 |
| 0,759435845 | 0,14448 | 0,74277646  | 0,00256 | MYO5A   | myosin VA (heavy chain 12, myosin)                                                 |
| 0,744322628 | 0,27682 | 0,804408371 | 0,02876 | MYO6    | myosin VI                                                                          |
| 1,294145654 | 0,05722 | 1,184271612 | 0,04312 | MYO7B   | myosin VIIb                                                                        |
| 1,242288282 | 0,19833 | 1,292352831 | 0,00428 | MYO9B   | myosin IXb                                                                         |
| 0,805524291 | 0,06446 | 0,784040454 | 0,00092 | MYOF    | myoferlin                                                                          |
| 1,199139914 | 0,05072 | 1,299539062 | 0,00614 | MYOZ1   | myozenin 1                                                                         |
| 1,261377409 | 0,11324 | 1,186736798 | 0,00226 | MYOZ3   | myozenin 3                                                                         |
| 1,107264584 | 0,2539  | 1,30224419  | 0,00005 | MYOZ3   | myozenin 3                                                                         |
| 1,07997656  | 0,45104 | 1,255271991 | 0,00167 | MYOZ3   | myozenin 3                                                                         |
| 1,102669163 | 0,29717 | 1,139973273 | 0,02715 | MYOZ3   | myozenin 3                                                                         |
| 1,019597683 | 0,83385 | 0,87417862  | 0,03971 | MYSM1   | Myb-like, SWIRM and MPN domains 1                                                  |
| 0,922103118 | 0,72249 | 0,772175133 | 0,03986 | MYSM1   | Myb-like, SWIRM and MPN domains 1                                                  |
| 0,982820599 | 0,87235 | 1,20163605  | 0,00257 | MZF1    | myeloid zinc finger 1                                                              |
| 0,990342872 | 0,94186 | 1,154285418 | 0,03796 | MZF1    | myeloid zinc finger 1                                                              |
| 0,784040454 | 0,05854 | 0,776468875 | 0,00366 | N4BP1   | NEDD4 binding protein 1                                                            |
| 0,754712984 | 0,06547 | 0,878430468 | 0,04016 | N4BP1   | NEDD4 binding protein 1                                                            |
| 0,888842681 | 0,56849 | 0,793883931 | 0,00278 | N4BP1   | NEDD4 binding protein 1                                                            |
| 0,971980988 | 0,77976 | 1,154285418 | 0,02092 | N4BP1   | NEDD4 binding protein 1                                                            |
| 0,963261894 | 0,84702 | 0,735603373 | 0,01151 | N4BP2   | NEDD4 binding protein 2                                                            |
| 0,720964436 | 0,13634 | 0,802737389 | 0,02009 | N4BP2   | NEDD4 binding protein 2                                                            |
| 1,184271612 | 0,44709 | 0,829894586 | 0,04423 | NA      | NA                                                                                 |
| 1,180992661 | 0,18164 | 1,147902414 | 0,02922 | NA      | NA                                                                                 |
| 0,776468875 | 0,19455 | 0,787853886 | 0,0025  | NA      | NA                                                                                 |
| 0,950000383 | 0,50926 | 0,886381699 | 0,01821 | NA      | NA                                                                                 |
| 0,977385766 | 0,76056 | 1,231998073 | 0,00142 | NA      | NA                                                                                 |
| 1,04608494  | 0,55968 | 1,099616149 | 0,02909 | NA      | NA                                                                                 |
| 1,076986376 | 0,38261 | 1,386069886 | 0,00768 | NA      | NA                                                                                 |

|             |         |             |         |    |    |
|-------------|---------|-------------|---------|----|----|
| 0,843815796 | 0,23201 | 0,683493726 | 0,01277 | NA | NA |
| 1,063632673 | 0,47333 | 1,139183377 | 0,02784 | NA | NA |
| 1,070288698 | 0,40532 | 1,084477409 | 0,03498 | NA | NA |
| 1,011853201 | 0,90831 | 1,258757174 | 0,00137 | NA | NA |
| 0,947370071 | 0,41625 | 1,151887642 | 0,03883 | NA | NA |
| 1,077733145 | 0,36277 | 1,20163605  | 0,00717 | NA | NA |
| 0,91383145  | 0,25149 | 0,836826243 | 0,00131 | NA | NA |
| 1,111108729 | 0,28241 | 1,136816973 | 0,01673 | NA | NA |
| 1,050444544 | 0,69408 | 1,149494848 | 0,00073 | NA | NA |
| 1,002776436 | 0,96347 | 1,145517898 | 0,02721 | NA | NA |
| 1,076986376 | 0,57727 | 1,240567298 | 0,00044 | NA | NA |
| 1,134455485 | 0,6289  | 0,784040454 | 0,04099 | NA | NA |
| 1,058484395 | 0,58738 | 1,168777249 | 0,00293 | NA | NA |
| 0,780786493 | 0,24259 | 0,713012859 | 0,00229 | NA | NA |
| 1,319507911 | 0,21105 | 1,568080908 | 0,00006 | NA | NA |
| 1,113421618 | 0,31179 | 1,155085785 | 0,00694 | NA | NA |
| 1,125838586 | 0,18473 | 0,841479482 | 0,02599 | NA | NA |
| 1,015366101 | 0,88549 | 1,133669413 | 0,03116 | NA | NA |
| 1,119612889 | 0,18341 | 1,140763716 | 0,03737 | NA | NA |
| 0,960594864 | 0,52454 | 1,145517898 | 0,02893 | NA | NA |
| 0,993092495 | 0,92866 | 1,119612889 | 0,0345  | NA | NA |
| 1,128964405 | 0,20208 | 1,151887642 | 0,0206  | NA | NA |
| 0,86154616  | 0,09037 | 0,79940583  | 0,00188 | NA | NA |
| 1,071773463 | 0,6776  | 0,787853886 | 0,013   | NA | NA |
| 0,879649076 | 0,22373 | 0,723467443 | 0,00245 | NA | NA |
| 0,972654947 | 0,77868 | 1,156688184 | 0,02162 | NA | NA |
| 0,922742493 | 0,38961 | 0,858565436 | 0,01238 | NA | NA |
| 0,939522749 | 0,79582 | 1,143930973 | 0,04722 | NA | NA |
| 1,120389214 | 0,26958 | 1,165541198 | 0,00333 | NA | NA |
| 1,01395948  | 0,82551 | 0,931740429 | 0,02633 | NA | NA |
| 1,252664439 | 0,10539 | 1,216722359 | 0,04344 | NA | NA |
| 1,322254605 | 0,05079 | 1,442928687 | 0,00063 | NA | NA |
| 0,938871747 | 0,74598 | 0,720464874 | 0,00005 | NA | NA |
| 0,961260928 | 0,84245 | 0,788946841 | 0,00224 | NA | NA |
| 0,739693755 | 0,10709 | 0,674083866 | 0,00055 | NA | NA |
| 0,906261938 | 0,16527 | 0,901250463 | 0,00632 | NA | NA |
| 0,505225723 | 0,10334 | 0,514770042 | 0,00007 | NA | NA |
| 0,836826243 | 0,35146 | 0,695923196 | 0,00227 | NA | NA |
| 1,038139271 | 0,61557 | 0,89688816  | 0,01788 | NA | NA |
| 0,993781093 | 0,92752 | 0,859160755 | 0,00517 | NA | NA |
| 0,601651513 | 0,07461 | 0,595841287 | 0,00018 | NA | NA |
| 1,037419937 | 0,68836 | 0,876605721 | 0,00857 | NA | NA |
| 1,072516617 | 0,28837 | 1,110338834 | 0,03098 | NA | NA |
| 0,952637998 | 0,64179 | 0,856188285 | 0,01256 | NA | NA |
| 0,829894586 | 0,05647 | 0,817335328 | 0,00039 | NA | NA |
| 0,855002178 | 0,24185 | 0,84264683  | 0,02304 | NA | NA |
| 1,150291893 | 0,34164 | 0,862143545 | 0,00039 | NA | NA |
| 1,095052471 | 0,32156 | 1,093535457 | 0,04015 | NA | NA |
| 1,085229372 | 0,37956 | 1,127400412 | 0,03538 | NA | NA |
| 1,104964485 | 0,26964 | 1,165541198 | 0,00826 | NA | NA |
| 0,904379378 | 0,67935 | 0,765778999 | 0,01342 | NA | NA |
| 0,85797053  | 0,35235 | 0,777007269 | 0,01862 | NA | NA |
| 1,108800644 | 0,48958 | 0,661127303 | 0,00015 | NA | NA |
| 1,25353302  | 0,20295 | 0,793883931 | 0,00369 | NA | NA |
| 1,601029621 | 0,06162 | 1,161508732 | 0,02803 | NA | NA |
| 0,863938187 | 0,18913 | 0,740206649 | 0,00725 | NA | NA |
| 0,773782497 | 0,31179 | 0,816768991 | 0,01745 | NA | NA |
| 1,128182137 | 0,3201  | 1,157490217 | 0,04574 | NA | NA |
| 0,894404902 | 0,45747 | 0,831045862 | 0,02425 | NA | NA |
| 1,094293701 | 0,42102 | 1,210833084 | 0,00717 | NA | NA |
| 1,130530567 | 0,16359 | 1,120389214 | 0,02969 | NA | NA |
| 1,160703914 | 0,0969  | 1,136816973 | 0,01083 | NA | NA |
| 1,172834949 | 0,25886 | 1,314031627 | 0,00028 | NA | NA |
| 1,142346247 | 0,23305 | 1,209155676 | 0,00959 | NA | NA |
| 1,086734863 | 0,52334 | 1,215879283 | 0,00385 | NA | NA |
| 1,222640278 | 0,06615 | 1,121943481 | 0,02378 | NA | NA |
| 1,108800644 | 0,35444 | 1,339783602 | 0,00745 | NA | NA |
| 1,125838586 | 0,22014 | 1,126619228 | 0,01464 | NA | NA |
| 0,976708529 | 0,79013 | 1,099616149 | 0,0355  | NA | NA |
| 1,240567298 | 0,08243 | 1,278099363 | 0,00138 | NA | NA |
| 0,76154437  | 0,12089 | 0,786217292 | 0,00628 | NA | NA |
| 0,890075733 | 0,21362 | 0,890075733 | 0,04251 | NA | NA |
| 1,145517898 | 0,08221 | 1,205807828 | 0,00257 | NA | NA |
| 1,176906737 | 0,15711 | 1,156688184 | 0,00828 | NA | NA |
| 1,060687741 | 0,44041 | 1,163120042 | 0,00378 | NA | NA |
| 1,088242442 | 0,34058 | 1,118061851 | 0,03531 | NA | NA |
| 1,028113827 | 0,80688 | 1,131314463 | 0,02239 | NA | NA |
| 1,226884977 | 0,08027 | 1,200803427 | 0,00448 | NA | NA |
| 1,125838586 | 0,17471 | 1,102669163 | 0,03127 | NA | NA |
| 1,146312186 | 0,05589 | 1,136029265 | 0,03552 | NA | NA |
| 1,345367209 | 0,10033 | 1,297738767 | 0,00019 | NA | NA |
| 0,941478465 | 0,6812  | 0,889458994 | 0,00419 | NA | NA |
| 0,97063447  | 0,71925 | 0,921464186 | 0,02957 | NA | NA |
| 0,877213549 | 0,59792 | 0,627201102 | 0,0003  | NA | NA |
| 1,131314463 | 0,15254 | 1,104198847 | 0,00409 | NA | NA |
| 1,190031696 | 0,11512 | 1,278985581 | 0,00056 | NA | NA |
| 1,299539062 | 0,06528 | 1,157490217 | 0,00565 | NA | NA |
| 0,767373048 | 0,05986 | 0,736113431 | 0,00117 | NA | NA |
| 0,734075318 | 0,31439 | 0,572758949 | 0       | NA | NA |
| 1,016070143 | 0,83325 | 0,915733686 | 0,04368 | NA | NA |
| 0,991716731 | 0,93997 | 0,91319825  | 0,01907 | NA | NA |
| 0,986232704 | 0,89578 | 1,223488041 | 0,00059 | NA | NA |
| 1,133669413 | 0,09655 | 1,363202607 | 0,00003 | NA | NA |
| 1,039579435 | 0,62766 | 1,172834949 | 0,00165 | NA | NA |
| 1,136029265 | 0,22127 | 1,266634254 | 0,00044 | NA | NA |
| 0,897510051 | 0,11762 | 0,897510051 | 0,01013 | NA | NA |
| 0,868742185 | 0,23621 | 0,84323111  | 0,04077 | NA | NA |
| 0,819604608 | 0,16664 | 0,824733549 | 0,02319 | NA | NA |
| 1,245737416 | 0,35616 | 0,833931044 | 0,01727 | NA | NA |
| 1,142346247 | 0,16741 | 1,111108729 | 0,03589 | NA | NA |
| 0,915733686 | 0,5486  | 0,819036698 | 0,00267 | NA | NA |
| 0,69640574  | 0,06109 | 0,785128119 | 0,00383 | NA | NA |
| 0,85027416  | 0,18097 | 0,844400887 | 0,01577 | NA | NA |
| 1,121166078 | 0,13437 | 1,128964405 | 0,00581 | NA | NA |

|             |         |             |         |    |    |
|-------------|---------|-------------|---------|----|----|
| 1,063632673 | 0,49883 | 1,215036792 | 0,00194 | NA | NA |
| 1,107264584 | 0,4797  | 1,225185332 | 0,01015 | NA | NA |
| 0,929804943 | 0,75702 | 0,704660378 | 0,00188 | NA | NA |
| 1,110338834 | 0,22642 | 1,163120042 | 0,01723 | NA | NA |
| 1,192508872 | 0,28884 | 0,915733686 | 0,04732 | NA | NA |
| 1,059952783 | 0,33424 | 0,907519155 | 0,04385 | NA | NA |
| 1,098092814 | 0,22097 | 1,118837101 | 0,00613 | NA | NA |
| 1,035264924 | 0,68562 | 0,932386486 | 0,03729 | NA | NA |
| 0,898755127 | 0,42633 | 0,813943185 | 0,00083 | NA | NA |
| 0,70270935  | 0,19777 | 0,731028724 | 0,02722 | NA | NA |
| 1,00765376  | 0,94104 | 1,07997656  | 0,04701 | NA | NA |
| 0,733566672 | 0,16685 | 0,756283999 | 0,00065 | NA | NA |
| 1,00556058  | 0,97756 | 1,325007017 | 0,01293 | NA | NA |
| 1,242288282 | 0,32321 | 1,238848698 | 0,0176  | NA | NA |
| 0,682073917 | 0,16138 | 0,722465199 | 0,01721 | NA | NA |
| 1,151089491 | 0,09549 | 1,156688184 | 0,0463  | NA | NA |
| 0,986916546 | 0,96286 | 0,804966138 | 0,0294  | NA | NA |
| 1,041021598 | 0,59033 | 1,132883885 | 0,04312 | NA | NA |
| 1,00486382  | 0,95361 | 1,131314463 | 0,01561 | NA | NA |
| 1,02313747  | 0,83849 | 1,234562607 | 0,00079 | NA | NA |
| 0,927230546 | 0,51742 | 0,857376037 | 0,04376 | NA | NA |
| 0,901875378 | 0,68111 | 0,730016005 | 0,00029 | NA | NA |
| 0,948026965 | 0,45132 | 0,868140228 | 0,01407 | NA | NA |
| 0,963261894 | 0,80291 | 0,701735863 | 0,00154 | NA | NA |
| 1,191682575 | 0,08921 | 1,092777739 | 0,03299 | NA | NA |
| 0,998614666 | 0,98345 | 1,17609125  | 0,00237 | NA | NA |
| 1,110338834 | 0,26646 | 1,137605228 | 0,01883 | NA | NA |
| 1,112650121 | 0,24818 | 1,127400412 | 0,0079  | NA | NA |
| 0,933032992 | 0,70416 | 0,84323111  | 0,02402 | NA | NA |
| 1,085981856 | 0,41511 | 1,195819797 | 0,0118  | NA | NA |
| 1,163926534 | 0,15552 | 1,163120042 | 0,00474 | NA | NA |
| 0,940174203 | 0,43943 | 1,144724161 | 0,04655 | NA | NA |
| 1,085229372 | 0,29073 | 1,140763716 | 0,01542 | NA | NA |
| 1,006257823 | 0,97633 | 0,812252396 | 0,02671 | NA | NA |
| 1,074749173 | 0,29471 | 0,885153765 | 0,0012  | NA | NA |
| 1,035264924 | 0,66171 | 1,136816973 | 0,00541 | NA | NA |
| 1,032398535 | 0,70493 | 0,932386486 | 0,03862 | NA | NA |
| 1,25092908  | 0,42358 | 1,337000495 | 0,00826 | NA | NA |
| 0,994470169 | 0,96195 | 0,885767519 | 0,00735 | NA | NA |
| 1,162314108 | 0,16761 | 1,156688184 | 0,01047 | NA | NA |
| 0,617281303 | 0,10553 | 0,755236293 | 0,00178 | NA | NA |
| 0,767905135 | 0,23128 | 0,843815796 | 0,02725 | NA | NA |
| 1,099616149 | 0,65086 | 0,868140228 | 0,03116 | NA | NA |
| 0,993781093 | 0,95195 | 1,133669413 | 0,00828 | NA | NA |
| 1,167158102 | 0,11519 | 1,129747215 | 0,01829 | NA | NA |
| 1,0132569   | 0,84908 | 1,096571589 | 0,01481 | NA | NA |
| 0,980779004 | 0,92883 | 0,770571108 | 0,00146 | NA | NA |
| 0,796640096 | 0,44471 | 0,719965659 | 0,01103 | NA | NA |
| 0,750019495 | 0,11237 | 0,742261785 | 0,00002 | NA | NA |
| 1,017479692 | 0,84557 | 0,858565436 | 0,01863 | NA | NA |
| 1,100378609 | 0,39726 | 1,185914499 | 0,00721 | NA | NA |
| 1,082224645 | 0,75797 | 0,855002178 | 0,02058 | NA | NA |
| 0,755759964 | 0,08952 | 0,646624466 | 0,00002 | NA | NA |
| 1,054822317 | 0,53444 | 1,127400412 | 0,00228 | NA | NA |
| 1,360370852 | 0,0611  | 1,399585866 | 0,00015 | NA | NA |
| 0,927230546 | 0,79544 | 0,820172911 | 0,04141 | NA | NA |
| 1,040300267 | 0,70224 | 0,872967591 | 0,0359  | NA | NA |
| 0,864537231 | 0,14816 | 0,751059963 | 0,00004 | NA | NA |
| 1,079228237 | 0,45373 | 1,243149669 | 0,01852 | NA | NA |
| 0,886996305 | 0,08004 | 0,893785162 | 0,00751 | NA | NA |
| 0,912565489 | 0,69398 | 0,880259014 | 0,03983 | NA | NA |
| 1,104964485 | 0,54141 | 0,847332435 | 0,00897 | NA | NA |
| 1,10343374  | 0,35894 | 0,833353207 | 0,01098 | NA | NA |
| 1,063632673 | 0,73759 | 0,740719899 | 0,00268 | NA | NA |
| 0,996540263 | 0,96898 | 1,133669413 | 0,02213 | NA | NA |
| 1,202469249 | 0,19911 | 1,244874235 | 0,01005 | NA | NA |
| 1,120389214 | 0,29845 | 1,210833084 | 0,01845 | NA | NA |
| 1,024556823 | 0,8798  | 0,845572287 | 0,00477 | NA | NA |
| 1,063632673 | 0,49167 | 1,22010051  | 0,00351 | NA | NA |
| 0,951318276 | 0,68399 | 1,168777249 | 0,02107 | NA | NA |
| 1,028826708 | 0,78328 | 1,144724161 | 0,01464 | NA | NA |
| 0,984184022 | 0,82378 | 1,150291893 | 0,00895 | NA | NA |
| 0,938871747 | 0,48121 | 0,809442217 | 0,00815 | NA | NA |
| 0,831045862 | 0,19591 | 0,743291492 | 0,00358 | NA | NA |
| 0,718470088 | 0,0744  | 0,621144141 | 0,00005 | NA | NA |
| 0,768437591 | 0,44241 | 0,724471077 | 0,00381 | NA | NA |
| 0,944092419 | 0,59508 | 0,799960128 | 0,00964 | NA | NA |
| 0,974679631 | 0,76598 | 0,910038824 | 0,00719 | NA | NA |
| 0,874784765 | 0,6232  | 0,715984371 | 0,01805 | NA | NA |
| 0,780786493 | 0,11643 | 0,790589117 | 0,04229 | NA | NA |
| 0,688725023 | 0,07698 | 0,728499557 | 0,0073  | NA | NA |
| 1,195819797 | 0,13024 | 1,136029265 | 0,02426 | NA | NA |
| 0,852044095 | 0,347   | 0,805524291 | 0,0121  | NA | NA |
| 0,839149637 | 0,18434 | 0,829894586 | 0,01358 | NA | NA |
| 1,258757174 | 0,10239 | 1,276328769 | 0,00339 | NA | NA |
| 1,134455485 | 0,16194 | 1,138394029 | 0,02295 | NA | NA |
| 1,118837101 | 0,33841 | 1,121943481 | 0,00732 | NA | NA |
| 1,018891197 | 0,81366 | 1,154285418 | 0,01692 | NA | NA |
| 1,050444544 | 0,62037 | 0,901875378 | 0,04249 | NA | NA |
| 1,199139914 | 0,07789 | 1,139973273 | 0,02494 | NA | NA |
| 1,146312186 | 0,16873 | 1,2397077   | 0,00022 | NA | NA |
| 0,990342872 | 0,89862 | 0,887611337 | 0,0337  | NA | NA |
| 1,060687741 | 0,44872 | 1,237132479 | 0,00524 | NA | NA |
| 1,033114388 | 0,75627 | 1,316766922 | 0,00086 | NA | NA |
| 1,020304659 | 0,77582 | 1,25962998  | 0       | NA | NA |
| 1,027401439 | 0,6794  | 1,123499903 | 0,00585 | NA | NA |
| 1,016070143 | 0,84668 | 0,915733686 | 0,01603 | NA | NA |
| 0,933679945 | 0,4128  | 1,209994089 | 0,00411 | NA | NA |
| 1,070288698 | 0,56025 | 1,151089491 | 0,00193 | NA | NA |
| 1,093535457 | 0,47048 | 1,230291345 | 0,00362 | NA | NA |
| 1,139183377 | 0,09817 | 1,094293701 | 0,04178 | NA | NA |
| 1,012554807 | 0,89793 | 1,160703914 | 0,01468 | NA | NA |
| 0,562139462 | 0,12301 | 0,440129507 | 0       | NA | NA |
| 0,972654947 | 0,67453 | 0,869947353 | 0,00691 | NA | NA |



|             |         |             |         |    |    |
|-------------|---------|-------------|---------|----|----|
| 0,789493887 | 0,10948 | 0,849096246 | 0,03192 | NA | NA |
| 0,8962667   | 0,43942 | 0,859756486 | 0,02785 | NA | NA |
| 1,232852325 | 0,05825 | 1,237132479 | 0,00033 | NA | NA |
| 0,781869643 | 0,33338 | 0,738669032 | 0,01101 | NA | NA |
| 1,218410264 | 0,08354 | 1,220946513 | 0,00089 | NA | NA |
| 0,853817714 | 0,23718 | 0,865136691 | 0,00911 | NA | NA |
| 0,785672517 | 0,37564 | 0,771640088 | 0,01562 | NA | NA |
| 0,883315051 | 0,44938 | 0,823020345 | 0,00884 | NA | NA |
| 0,618995145 | 0,10441 | 0,687294348 | 0,00337 | NA | NA |
| 1,136816973 | 0,21253 | 1,092020546 | 0,03648 | NA | NA |
| 1,147902414 | 0,35759 | 1,309485423 | 0,00272 | NA | NA |
| 1,015366101 | 0,84999 | 0,935623498 | 0,03517 | NA | NA |
| 1,131314463 | 0,57517 | 1,242288282 | 0,03432 | NA | NA |
| 0,746389192 | 0,14306 | 0,848507902 | 0,03951 | NA | NA |
| 0,927873476 | 0,30729 | 0,909408252 | 0,01706 | NA | NA |
| 0,892546971 | 0,47851 | 0,802737389 | 0,01724 | NA | NA |
| 0,922103118 | 0,5109  | 1,157490217 | 0,03848 | NA | NA |
| 1,010451446 | 0,882   | 0,915733686 | 0,04435 | NA | NA |
| 0,745355193 | 0,29505 | 0,61301743  | 0,00001 | NA | NA |
| 1,10343374  | 0,34214 | 1,121166078 | 0,01693 | NA | NA |
| 1,138394029 | 0,25278 | 1,209994089 | 0,00589 | NA | NA |
| 1,078480432 | 0,36057 | 0,937571096 | 0,04661 | NA | NA |
| 1,086734863 | 0,41708 | 1,120389214 | 0,01908 | NA | NA |
| 1,040300267 | 0,66991 | 1,143138335 | 0,01667 | NA | NA |
| 0,862143545 | 0,14749 | 1,127400412 | 0,03362 | NA | NA |
| 1,100378609 | 0,37613 | 1,193335743 | 0,00198 | NA | NA |
| 1,129747215 | 0,21245 | 1,231998073 | 0,00374 | NA | NA |
| 0,894404902 | 0,64806 | 0,797192477 | 0,03137 | NA | NA |
| 1,058484395 | 0,58415 | 1,198309021 | 0,00773 | NA | NA |
| 1,058484395 | 0,42686 | 0,901250463 | 0,04334 | NA | NA |
| 0,877821798 | 0,19642 | 0,859160755 | 0,00723 | NA | NA |
| 0,957935218 | 0,73408 | 1,097331938 | 0,04746 | NA | NA |
| 0,959929261 | 0,69234 | 1,096571589 | 0,02882 | NA | NA |
| 0,940826108 | 0,44536 | 0,875998315 | 0,01903 | NA | NA |
| 1,114966219 | 0,21594 | 1,131314463 | 0,01217 | NA | NA |
| 0,974004269 | 0,81292 | 1,159095952 | 0,00569 | NA | NA |
| 1,122721422 | 0,16102 | 1,222640278 | 0,00102 | NA | NA |
| 1,115739322 | 0,21186 | 1,134455485 | 0,04845 | NA | NA |
| 1,085229372 | 0,47768 | 1,176906737 | 0,01467 | NA | NA |
| 1,071773463 | 0,29036 | 1,190031696 | 0,00125 | NA | NA |
| 1,078480432 | 0,44949 | 1,147107024 | 0,00358 | NA | NA |
| 1,101905116 | 0,26956 | 1,152686347 | 0,01093 | NA | NA |
| 0,944747041 | 0,54405 | 0,863339559 | 0,01457 | NA | NA |
| 1,061423209 | 0,8582  | 0,716977624 | 0,00732 | NA | NA |
| 1,079228237 | 0,28564 | 0,915733686 | 0,02377 | NA | NA |
| 1,216722359 | 0,12449 | 1,203303026 | 0,00102 | NA | NA |
| 1,041021598 | 0,6893  | 1,150291893 | 0,02625 | NA | NA |
| 1,074749173 | 0,35288 | 1,179356592 | 0,00357 | NA | NA |
| 1,208317843 | 0,06075 | 1,185914499 | 0,0107  | NA | NA |
| 0,934975198 | 0,3714  | 1,106497353 | 0,04955 | NA | NA |
| 1,271031689 | 0,06254 | 1,281647924 | 0,01001 | NA | NA |
| 0,993092495 | 0,95393 | 1,132098902 | 0,0292  | NA | NA |
| 1,101905116 | 0,36613 | 1,169587664 | 0,04425 | NA | NA |
| 0,978063473 | 0,83939 | 1,146312186 | 0,03958 | NA | NA |
| 1,059218335 | 0,52588 | 1,093535457 | 0,03969 | NA | NA |
| 0,879649076 | 0,30904 | 0,820741609 | 0,0105  | NA | NA |
| 0,66158572  | 0,10991 | 0,66158572  | 0,00326 | NA | NA |
| 1,057018041 | 0,54348 | 1,189207115 | 0,00023 | NA | NA |
| 1,062895674 | 0,40346 | 1,121943481 | 0,04074 | NA | NA |
| 1,131314463 | 0,18819 | 1,200803427 | 0,001   | NA | NA |
| 1,118837101 | 0,24437 | 1,145517898 | 0,04281 | NA | NA |
| 1,132098902 | 0,16807 | 1,250062303 | 0,0002  | NA | NA |
| 0,942784536 | 0,53474 | 1,188383105 | 0,00316 | NA | NA |
| 1,025267238 | 0,77931 | 0,872362706 | 0,03947 | NA | NA |
| 0,743806881 | 0,10906 | 0,876605721 | 0,03175 | NA | NA |
| 1,095052471 | 0,25981 | 1,163926534 | 0,02838 | NA | NA |
| 0,679714121 | 0,131   | 0,819604608 | 0,03633 | NA | NA |
| 0,980779004 | 0,7903  | 0,918276162 | 0,03813 | NA | NA |
| 1,072516617 | 0,5226  | 1,112650121 | 0,02792 | NA | NA |
| 0,982139595 | 0,82027 | 1,174461971 | 0,01482 | NA | NA |
| 1,001387256 | 0,98666 | 1,274560627 | 0,00612 | NA | NA |
| 1,104198847 | 0,34198 | 1,111879158 | 0,02574 | NA | NA |
| 1,120389214 | 0,16182 | 1,191682575 | 0,00016 | NA | NA |
| 1,139973273 | 0,11826 | 1,097331938 | 0,02182 | NA | NA |
| 1,155085785 | 0,07128 | 1,29056249  | 0,00286 | NA | NA |
| 1,084477409 | 0,46402 | 1,147107024 | 0,01734 | NA | NA |
| 1,051172909 | 0,6249  | 1,080725402 | 0,02554 | NA | NA |
| 1,178539408 | 0,05751 | 1,183451022 | 0,03898 | NA | NA |
| 1,185092771 | 0,10451 | 1,117287138 | 0,04277 | NA | NA |
| 1,057018041 | 0,54381 | 1,133669413 | 0,01087 | NA | NA |
| 1,106497353 | 0,19974 | 1,115739322 | 0,02349 | NA | NA |
| 1,134455485 | 0,2633  | 1,168777249 | 0,01701 | NA | NA |
| 1,113421618 | 0,24337 | 1,244874235 | 0,00375 | NA | NA |
| 1,154285418 | 0,19608 | 1,179356592 | 0,00735 | NA | NA |
| 1,081474763 | 0,29356 | 1,146312186 | 0,01127 | NA | NA |
| 0,982820599 | 0,86311 | 1,147107024 | 0,02511 | NA | NA |
| 1,114966219 | 0,32026 | 1,120389214 | 0,017   | NA | NA |
| 1,026689546 | 0,71632 | 1,143930973 | 0,00675 | NA | NA |
| 1,092777739 | 0,32802 | 1,175276328 | 0,00101 | NA | NA |
| 1,167158102 | 0,12545 | 1,167967395 | 0,01816 | NA | NA |
| 1,058484395 | 0,4096  | 1,129747215 | 0,00971 | NA | NA |
| 1,043911927 | 0,51086 | 1,088242442 | 0,01736 | NA | NA |
| 1,113421618 | 0,20828 | 1,123499903 | 0,02735 | NA | NA |
| 1,020304659 | 0,76566 | 1,245737416 | 0,00027 | NA | NA |
| 1,035982764 | 0,73693 | 1,157490217 | 0,00589 | NA | NA |
| 1,123499903 | 0,36095 | 1,108800644 | 0,01071 | NA | NA |
| 1,133669413 | 0,34267 | 1,128964405 | 0,02819 | NA | NA |
| 1,242288282 | 0,09476 | 1,121166078 | 0,04436 | NA | NA |
| 0,922103118 | 0,44184 | 0,815072332 | 0,01011 | NA | NA |
| 0,937571096 | 0,33471 | 0,89564567  | 0,04246 | NA | NA |
| 1,122721422 | 0,22332 | 1,140763716 | 0,03161 | NA | NA |
| 0,866336856 | 0,29155 | 0,856781955 | 0,00959 | NA | NA |
| 0,809442217 | 0,06191 | 0,820741609 | 0,00132 | NA | NA |
| 1,167967395 | 0,14963 | 1,099616149 | 0,04656 | NA | NA |

|             |         |             |         |    |    |
|-------------|---------|-------------|---------|----|----|
| 1,143930973 | 0,10067 | 1,101141598 | 0,02943 | NA | NA |
| 1,104964485 | 0,29239 | 1,147107024 | 0,02478 | NA | NA |
| 1,055553718 | 0,49598 | 1,102669163 | 0,04744 | NA | NA |
| 1,092777739 | 0,3491  | 1,135242102 | 0,0263  | NA | NA |
| 1,008352455 | 0,93024 | 1,159095952 | 0,01313 | NA | NA |
| 1,036701101 | 0,73631 | 1,186736798 | 0,00663 | NA | NA |
| 0,965936329 | 0,78206 | 1,092020546 | 0,04027 | NA | NA |
| 1,07549439  | 0,32951 | 1,100378609 | 0,04237 | NA | NA |
| 0,89688816  | 0,68813 | 0,727490342 | 0,00219 | NA | NA |
| 1,220946513 | 0,09462 | 1,143138335 | 0,00183 | NA | NA |
| 0,953959551 | 0,61339 | 1,107264584 | 0,02012 | NA | NA |
| 1,114193651 | 0,29353 | 1,142346247 | 0,02195 | NA | NA |
| 0,97874165  | 0,83033 | 1,165541198 | 0,04515 | NA | NA |
| 1,21335356  | 0,06957 | 1,266634254 | 0,00029 | NA | NA |
| 1,004167543 | 0,96521 | 1,118837101 | 0,02248 | NA | NA |
| 1,054822317 | 0,64465 | 1,097331938 | 0,02272 | NA | NA |
| 1,016070143 | 0,87678 | 1,119612889 | 0,04525 | NA | NA |
| 0,930449658 | 0,43111 | 0,894404902 | 0,02071 | NA | NA |
| 1,136029265 | 0,2334  | 1,142346247 | 0,04141 | NA | NA |
| 0,960594864 | 0,58631 | 0,905006463 | 0,03993 | NA | NA |
| 1,123499903 | 0,23469 | 1,108032348 | 0,0335  | NA | NA |
| 0,928516852 | 0,42144 | 1,145517898 | 0,03883 | NA | NA |
| 0,848507902 | 0,11583 | 0,901875378 | 0,02692 | NA | NA |
| 0,727994774 | 0,07416 | 0,782954296 | 0,00608 | NA | NA |
| 1,043911927 | 0,72106 | 1,128182137 | 0,03119 | NA | NA |
| 0,990342872 | 0,88475 | 0,901875378 | 0,04144 | NA | NA |
| 0,982139595 | 0,89277 | 0,829319546 | 0,00189 | NA | NA |
| 0,920187651 | 0,60052 | 0,765778999 | 0,02069 | NA | NA |
| 1,193335743 | 0,0659  | 1,121166078 | 0,0131  | NA | NA |
| 0,762600827 | 0,23137 | 0,777007269 | 0,00786 | NA | NA |
| 0,992404375 | 0,91087 | 1,121943481 | 0,04269 | NA | NA |
| 0,758383773 | 0,20921 | 0,635075491 | 0,00003 | NA | NA |
| 1,121943481 | 0,35921 | 1,231144413 | 0,00189 | NA | NA |
| 1,317679952 | 0,11656 | 1,188383105 | 0,02251 | NA | NA |
| 1,193335743 | 0,24662 | 1,198309021 | 0,01579 | NA | NA |
| 0,908778116 | 0,63572 | 0,789493887 | 0,01776 | NA | NA |
| 1,00556058  | 0,95889 | 1,180174343 | 0,01771 | NA | NA |
| 0,73153561  | 0,06377 | 0,792784137 | 0,00267 | NA | NA |
| 1,118837101 | 0,28298 | 1,118061851 | 0,03414 | NA | NA |
| 0,963261894 | 0,58124 | 0,936921447 | 0,04298 | NA | NA |
| 0,828170661 | 0,46611 | 0,750019495 | 0,00803 | NA | NA |
| 0,985549337 | 0,81079 | 0,880869374 | 0,00813 | NA | NA |
| 0,796088099 | 0,08499 | 0,828744904 | 0,01758 | NA | NA |
| 1,104964485 | 0,22127 | 1,159095952 | 0,01889 | NA | NA |
| 1,117287138 | 0,27155 | 1,116512962 | 0,02882 | NA | NA |
| 0,984184022 | 0,80483 | 0,872362706 | 0,00607 | NA | NA |
| 1,104198847 | 0,15059 | 1,104964485 | 0,0305  | NA | NA |
| 0,890692901 | 0,55175 | 0,800514811 | 0,01379 | NA | NA |
| 1,019597683 | 0,76622 | 1,093535457 | 0,04071 | NA | NA |
| 0,982139595 | 0,8275  | 1,115739322 | 0,03913 | NA | NA |
| 1,221793102 | 0,07744 | 1,165541198 | 0,01935 | NA | NA |
| 1,131314463 | 0,22687 | 1,151887642 | 0,02012 | NA | NA |
| 1,088242442 | 0,46829 | 1,223488041 | 0,00529 | NA | NA |
| 1,136816973 | 0,23814 | 1,169587664 | 0,00411 | NA | NA |
| 0,984184022 | 0,86525 | 1,224336392 | 0,03908 | NA | NA |
| 0,982139595 | 0,85471 | 1,116512962 | 0,04703 | NA | NA |
| 1,180174343 | 0,06044 | 1,195819797 | 0,01133 | NA | NA |
| 1,021012126 | 0,89038 | 1,218410264 | 0,01813 | NA | NA |
| 1,022428531 | 0,81709 | 1,17772279  | 0,0206  | NA | NA |
| 1,011152081 | 0,8822  | 1,101141598 | 0,01846 | NA | NA |
| 1,065846736 | 0,4758  | 1,20163605  | 0,00589 | NA | NA |
| 0,946713631 | 0,38651 | 1,121943481 | 0,00842 | NA | NA |
| 1,072516617 | 0,28945 | 1,078480432 | 0,04932 | NA | NA |
| 0,991716731 | 0,94047 | 1,159095952 | 0,00454 | NA | NA |
| 1,076240125 | 0,44753 | 1,159899655 | 0,00719 | NA | NA |
| 1,185914499 | 0,15148 | 1,147107024 | 0,01286 | NA | NA |
| 1,199971382 | 0,12454 | 1,278099363 | 0,00081 | NA | NA |
| 0,914465089 | 0,65999 | 0,708087719 | 0,0007  | NA | NA |
| 1,127400412 | 0,12197 | 1,173648178 | 0,00095 | NA | NA |
| 1,147107024 | 0,26142 | 1,141554707 | 0,0311  | NA | NA |
| 1,044635763 | 0,60523 | 1,121943481 | 0,02545 | NA | NA |
| 1,109569472 | 0,24106 | 1,150291893 | 0,00872 | NA | NA |
| 1,066585781 | 0,48446 | 1,140763716 | 0,02335 | NA | NA |
| 1,057750964 | 0,54521 | 1,134455485 | 0,04834 | NA | NA |
| 0,996540263 | 0,96728 | 1,114193651 | 0,04118 | NA | NA |
| 1,071773463 | 0,37149 | 1,105730653 | 0,01785 | NA | NA |
| 1,019597683 | 0,87091 | 1,173648178 | 0,02551 | NA | NA |
| 1,149494848 | 0,24703 | 1,109569472 | 0,03164 | NA | NA |
| 1,111108729 | 0,30683 | 1,151887642 | 0,00453 | NA | NA |
| 1,064370182 | 0,4232  | 1,193335743 | 0,00392 | NA | NA |
| 1,043911927 | 0,54683 | 1,132098902 | 0,04086 | NA | NA |
| 1,091263877 | 0,60687 | 1,210833084 | 0,00086 | NA | NA |
| 1,032398535 | 0,66462 | 1,111108729 | 0,01653 | NA | NA |
| 1,066585781 | 0,5002  | 1,167967395 | 0,00601 | NA | NA |
| 0,835666959 | 0,20306 | 0,798298386 | 0,00446 | NA | NA |
| 0,934327347 | 0,80515 | 0,610050255 | 0,00124 | NA | NA |
| 1,158292806 | 0,05277 | 1,122721422 | 0,02853 | NA | NA |
| 1,125838586 | 0,2257  | 1,150291893 | 0,01062 | NA | NA |
| 1,098092814 | 0,3849  | 1,122721422 | 0,02862 | NA | NA |
| 1,025267238 | 0,77753 | 1,153485605 | 0,02993 | NA | NA |
| 0,982820599 | 0,88266 | 1,204972315 | 0,00381 | NA | NA |
| 1,161508732 | 0,06297 | 1,102669163 | 0,02481 | NA | NA |
| 1,011152081 | 0,88748 | 1,110338834 | 0,03917 | NA | NA |
| 0,981459064 | 0,78568 | 1,092020546 | 0,0435  | NA | NA |
| 0,901875378 | 0,25448 | 0,86934456  | 0,03049 | NA | NA |
| 0,84323111  | 0,05114 | 0,866336856 | 0,04849 | NA | NA |
| 1,126619228 | 0,41484 | 1,22603486  | 0,04108 | NA | NA |
| 1,065108203 | 0,44798 | 1,125058485 | 0,02737 | NA | NA |
| 0,89564567  | 0,20998 | 0,755236293 | 0,00001 | NA | NA |
| 1,136816973 | 0,28174 | 1,197478705 | 0,00214 | NA | NA |
| 1,125058485 | 0,1646  | 1,129747215 | 0,03965 | NA | NA |
| 1,020304659 | 0,78797 | 0,90062598  | 0,02967 | NA | NA |
| 1,106497353 | 0,31046 | 1,145517898 | 0,01878 | NA | NA |
| 1,098092814 | 0,31918 | 1,184271612 | 0,0025  | NA | NA |

|             |         |             |         |    |    |
|-------------|---------|-------------|---------|----|----|
| 1,163120042 | 0,05671 | 1,121166078 | 0,03413 | NA | NA |
| 0,995159722 | 0,95976 | 1,170398641 | 0,02372 | NA | NA |
| 1,022428531 | 0,73237 | 0,933032992 | 0,03651 | NA | NA |
| 1,260503392 | 0,09982 | 1,168777249 | 0,01377 | NA | NA |
| 1,143930973 | 0,29077 | 1,158292806 | 0,02974 | NA | NA |
| 0,90062598  | 0,63244 | 0,710053679 | 0,00026 | NA | NA |
| 0,968618189 | 0,65858 | 0,925304428 | 0,04416 | NA | NA |
| 1,069547088 | 0,51774 | 1,104964485 | 0,03376 | NA | NA |
| 0,930449658 | 0,4935  | 1,162314108 | 0,01987 | NA | NA |
| 0,975355462 | 0,74624 | 1,151089491 | 0,00597 | NA | NA |
| 1,07549439  | 0,40735 | 1,086734863 | 0,02728 | NA | NA |
| 1,307671349 | 0,06131 | 1,319507911 | 0,00034 | NA | NA |
| 1,116512962 | 0,30153 | 1,194163187 | 0,01063 | NA | NA |
| 0,954621014 | 0,80689 | 0,772175133 | 0,01151 | NA | NA |
| 1,10343374  | 0,36765 | 1,225185332 | 0,0003  | NA | NA |
| 0,609205132 | 0,11513 | 0,541487523 | 0,00001 | NA | NA |
| 1,179356592 | 0,07325 | 1,241427492 | 0,00089 | NA | NA |
| 1,088242442 | 0,39281 | 1,171210181 | 0,00697 | NA | NA |
| 0,969289817 | 0,63193 | 0,886381699 | 0,01554 | NA | NA |
| 1,085981856 | 0,3291  | 1,155886707 | 0,03297 | NA | NA |
| 1,058484395 | 0,45322 | 1,139973273 | 0,00157 | NA | NA |
| 1,176906737 | 0,06275 | 1,109569472 | 0,01895 | NA | NA |
| 1,071030823 | 0,47404 | 1,156688184 | 0,00892 | NA | NA |
| 0,996540263 | 0,96806 | 1,084477409 | 0,039   | NA | NA |
| 1,058484395 | 0,47952 | 1,091263877 | 0,04584 | NA | NA |
| 0,927230546 | 0,2471  | 0,897510051 | 0,01275 | NA | NA |
| 1,022428531 | 0,75557 | 1,148698355 | 0,01634 | NA | NA |
| 1,026689546 | 0,75425 | 1,132098902 | 0,00101 | NA | NA |
| 1,118061851 | 0,1434  | 1,091263877 | 0,03087 | NA | NA |
| 1,189207115 | 0,05523 | 1,147107024 | 0,00447 | NA | NA |
| 1,072516617 | 0,77649 | 0,758383773 | 0,03257 | NA | NA |
| 0,968618189 | 0,90518 | 0,787307977 | 0,00302 | NA | NA |
| 1,129747215 | 0,33432 | 0,842062954 | 0,00626 | NA | NA |
| 1,112650121 | 0,15108 | 1,101905116 | 0,04099 | NA | NA |
| 1,183451022 | 0,07095 | 1,155085785 | 0,00684 | NA | NA |
| 0,984866443 | 0,87666 | 1,122721422 | 0,021   | NA | NA |
| 1,058484395 | 0,54126 | 1,16634937  | 0,01905 | NA | NA |
| 0,934327347 | 0,40672 | 0,87175824  | 0,02143 | NA | NA |
| 0,969289817 | 0,70535 | 1,151089491 | 0,00183 | NA | NA |
| 0,858565436 | 0,07458 | 0,801625329 | 0,00057 | NA | NA |
| 1,265756594 | 0,22138 | 1,255271991 | 0,00397 | NA | NA |
| 1,125838586 | 0,23783 | 1,32592576  | 0,00009 | NA | NA |
| 1,043188594 | 0,68423 | 1,159899655 | 0,03067 | NA | NA |
| 1,118061851 | 0,17692 | 1,145517898 | 0,01241 | NA | NA |
| 1,010451446 | 0,89182 | 1,095052471 | 0,01214 | NA | NA |
| 0,87417862  | 0,17371 | 1,16634937  | 0,03514 | NA | NA |
| 0,908148418 | 0,46396 | 0,824733549 | 0,0048  | NA | NA |
| 0,786762445 | 0,16643 | 0,722966147 | 0,00004 | NA | NA |
| 0,887611337 | 0,42392 | 0,897510051 | 0,02622 | NA | NA |
| 0,877213549 | 0,26211 | 0,855002178 | 0,02758 | NA | NA |
| 1,091263877 | 0,36748 | 1,136816973 | 0,00628 | NA | NA |
| 1,008352455 | 0,94617 | 1,2397077   | 0,00369 | NA | NA |
| 0,711038705 | 0,13145 | 0,767905135 | 0,01568 | NA | NA |
| 0,959264119 | 0,74585 | 0,876605721 | 0,0318  | NA | NA |
| 1,200803427 | 0,25653 | 0,906890329 | 0,017   | NA | NA |
| 1,161508732 | 0,20961 | 1,172834949 | 0,01155 | NA | NA |
| 1,199971382 | 0,5606  | 0,824733549 | 0,03808 | NA | NA |
| 1,122721422 | 0,28569 | 1,181811547 | 0,01174 | NA | NA |
| 1,048262476 | 0,50458 | 1,151089491 | 0,00119 | NA | NA |
| 1,142346247 | 0,28582 | 1,157490217 | 0,03587 | NA | NA |
| 0,886381699 | 0,16291 | 0,908778116 | 0,04727 | NA | NA |
| 1,176906737 | 0,06097 | 1,173648178 | 0,00232 | NA | NA |
| 1,241427492 | 0,05997 | 1,214194884 | 0,00721 | NA | NA |
| 1,054822317 | 0,62616 | 1,132098902 | 0,00243 | NA | NA |
| 1,094293701 | 0,28315 | 1,230291345 | 0,01048 | NA | NA |
| 0,910669834 | 0,21344 | 1,119612889 | 0,0251  | NA | NA |
| 1,053361036 | 0,80401 | 0,796640096 | 0,00287 | NA | NA |
| 1,028826708 | 0,74765 | 1,132098902 | 0,03634 | NA | NA |
| 0,891310496 | 0,15134 | 1,167967395 | 0,00168 | NA | NA |
| 1,064370182 | 0,55122 | 1,171210181 | 0,01188 | NA | NA |
| 1,081474763 | 0,45027 | 1,20664392  | 0,0008  | NA | NA |
| 1,218410264 | 0,05212 | 1,144724161 | 0,00101 | NA | NA |
| 1,057018041 | 0,54858 | 1,185914499 | 0,01319 | NA | NA |
| 1,121943481 | 0,22954 | 1,220946513 | 0,00217 | NA | NA |
| 1,078480432 | 0,36584 | 1,151887642 | 0,00967 | NA | NA |
| 0,929804943 | 0,32059 | 0,879649076 | 0,04889 | NA | NA |
| 1,017479692 | 0,85897 | 1,121943481 | 0,0236  | NA | NA |
| 0,907519155 | 0,20744 | 1,124278924 | 0,04208 | NA | NA |
| 0,951318276 | 0,53487 | 1,185092771 | 0,00485 | NA | NA |
| 1,047536127 | 0,67644 | 1,169587664 | 0,01867 | NA | NA |
| 1,114966219 | 0,17761 | 1,120389214 | 0,04404 | NA | NA |
| 1,164733586 | 0,42837 | 1,159095952 | 0,03198 | NA | NA |
| 1,100378609 | 0,24942 | 1,132883885 | 0,00878 | NA | NA |
| 1,020304659 | 0,8448  | 1,2397077   | 0,0009  | NA | NA |
| 1,160703914 | 0,10751 | 1,173648178 | 0,00191 | NA | NA |
| 1,057750964 | 0,54682 | 1,131314463 | 0,01538 | NA | NA |
| 1,110338834 | 0,19842 | 1,136029265 | 0,02336 | NA | NA |
| 1,029540083 | 0,75102 | 1,283425898 | 0,00545 | NA | NA |
| 1,072516617 | 0,51186 | 1,126619228 | 0,04257 | NA | NA |
| 1,065108203 | 0,39368 | 1,134455485 | 0,03475 | NA | NA |
| 1,016774673 | 0,88313 | 1,158292806 | 0,03955 | NA | NA |
| 1,106497353 | 0,31974 | 1,142346247 | 0,00675 | NA | NA |
| 1,16634937  | 0,18515 | 1,182631    | 0,00821 | NA | NA |
| 1,086734863 | 0,30872 | 1,119612889 | 0,03195 | NA | NA |
| 1,057750964 | 0,47432 | 1,101905116 | 0,0202  | NA | NA |
| 1,0238469   | 0,79867 | 1,089752112 | 0,04143 | NA | NA |
| 1,057018041 | 0,54845 | 1,225185332 | 0,00017 | NA | NA |
| 1,161508732 | 0,24324 | 1,218410264 | 0,00058 | NA | NA |
| 1,057750964 | 0,41377 | 1,139183377 | 0,04379 | NA | NA |
| 1,101905116 | 0,14171 | 1,121943481 | 0,01303 | NA | NA |
| 0,937571096 | 0,43271 | 1,097331938 | 0,03397 | NA | NA |
| 0,776468875 | 0,094   | 0,765248385 | 0,02991 | NA | NA |
| 1,179356592 | 0,08345 | 1,202469249 | 0,00174 | NA | NA |
| 1,087488391 | 0,39163 | 1,195819797 | 0,01276 | NA | NA |

|             |         |             |         |    |    |
|-------------|---------|-------------|---------|----|----|
| 1,067325338 | 0,54208 | 1,098092814 | 0,0245  | NA | NA |
| 1,240567298 | 0,05091 | 1,116512962 | 0,03661 | NA | NA |
| 1,121943481 | 0,40022 | 1,215036792 | 0,00151 | NA | NA |
| 0,962594443 | 0,66836 | 0,906890329 | 0,02487 | NA | NA |
| 1,00486382  | 0,94814 | 1,275444392 | 0,00041 | NA | NA |
| 0,805524291 | 0,3462  | 0,762072415 | 0,03148 | NA | NA |
| 0,926588062 | 0,56124 | 0,775930854 | 0,00003 | NA | NA |
| 1,048989328 | 0,65744 | 1,168777249 | 0,02698 | NA | NA |
| 1,056285625 | 0,65671 | 1,188383105 | 0,00539 | NA | NA |
| 1,168777249 | 0,08277 | 1,20163605  | 0,00188 | NA | NA |
| 1,132098902 | 0,22613 | 1,139973273 | 0,00389 | NA | NA |
| 1,204137381 | 0,11745 | 1,117287138 | 0,03867 | NA | NA |
| 0,883927531 | 0,26407 | 0,816768991 | 0,00123 | NA | NA |
| 1,247465572 | 0,29168 | 1,230291345 | 0,02208 | NA | NA |
| 1,089752112 | 0,32291 | 1,185092771 | 0,00393 | NA | NA |
| 0,666187413 | 0,10892 | 0,583174685 | 0,00001 | NA | NA |
| 0,865736566 | 0,14982 | 0,920187651 | 0,04135 | NA | NA |
| 1,220946513 | 0,07769 | 1,30224419  | 0,00612 | NA | NA |
| 0,947370071 | 0,47227 | 0,893165852 | 0,0184  | NA | NA |
| 0,984184022 | 0,82435 | 1,070288698 | 0,04301 | NA | NA |
| 0,940826108 | 0,58171 | 1,265756594 | 0,00227 | NA | NA |
| 0,938221197 | 0,42002 | 1,188383105 | 0,01045 | NA | NA |
| 0,974004269 | 0,79288 | 1,151887642 | 0,01531 | NA | NA |
| 0,991029563 | 0,93819 | 0,710053679 | 0,00003 | NA | NA |
| 1,046810282 | 0,58267 | 0,825877665 | 0,00016 | NA | NA |
| 1,057018041 | 0,4454  | 1,092020546 | 0,02787 | NA | NA |
| 1,016070143 | 0,89163 | 1,154285418 | 0,00659 | NA | NA |
| 1,127400412 | 0,10908 | 1,133669413 | 0,02823 | NA | NA |
| 0,923382311 | 0,26084 | 0,89688816  | 0,01509 | NA | NA |
| 0,897510051 | 0,1128  | 0,911301281 | 0,02309 | NA | NA |
| 1,098854218 | 0,19905 | 1,178539408 | 0,00153 | NA | NA |
| 1,063632673 | 0,45493 | 1,136816973 | 0,02645 | NA | NA |
| 1,148698355 | 0,0791  | 1,111879158 | 0,02001 | NA | NA |
| 0,985549337 | 0,85525 | 1,116512962 | 0,04667 | NA | NA |
| 0,760489377 | 0,09105 | 0,758909626 | 0,01306 | NA | NA |
| 1,149494848 | 0,23052 | 1,187559666 | 0,00256 | NA | NA |
| 0,815072332 | 0,14224 | 1,133669413 | 0,03583 | NA | NA |
| 0,823020345 | 0,2892  | 0,797192477 | 0,00184 | NA | NA |
| 0,730522189 | 0,32543 | 0,57236208  | 0,00007 | NA | NA |
| 1,161508732 | 0,09555 | 1,155085785 | 0,00269 | NA | NA |
| 1           | 0,99869 | 1,136029265 | 0,00971 | NA | NA |
| 1,002081605 | 0,98076 | 0,905006463 | 0,0235  | NA | NA |
| 1,124278924 | 0,20216 | 1,225185332 | 0,00262 | NA | NA |
| 1,161508732 | 0,26598 | 1,112650121 | 0,04849 | NA | NA |
| 0,956608158 | 0,65891 | 1,183451022 | 0,00568 | NA | NA |
| 1,057018041 | 0,68204 | 1,122721422 | 0,02788 | NA | NA |
| 1,139183377 | 0,20668 | 1,198309021 | 0,00613 | NA | NA |
| 1,178539408 | 0,14903 | 1,131314463 | 0,0171  | NA | NA |
| 1,252664439 | 0,05603 | 1,346300069 | 0,00029 | NA | NA |
| 0,857376037 | 0,16804 | 0,876605721 | 0,01665 | NA | NA |
| 0,976708529 | 0,84685 | 1,216722359 | 0,00089 | NA | NA |
| 0,988285652 | 0,90706 | 0,872967591 | 0,04444 | NA | NA |
| 1,098854218 | 0,28021 | 1,184271612 | 0,0125  | NA | NA |
| 0,991716731 | 0,95478 | 0,844986384 | 0,01484 | NA | NA |
| 1,060687741 | 0,56462 | 1,200803427 | 0,00207 | NA | NA |
| 1,168777249 | 0,11734 | 1,140763716 | 0,02593 | NA | NA |
| 1,030253954 | 0,7785  | 0,870550563 | 0,00638 | NA | NA |
| 0,907519155 | 0,51641 | 0,680657058 | 0,00016 | NA | NA |
| 0,89688816  | 0,33831 | 0,830470024 | 0,00297 | NA | NA |
| 1,043911927 | 0,53465 | 1,186736798 | 0,02048 | NA | NA |
| 1,194991205 | 0,15944 | 1,240567298 | 0,00034 | NA | NA |
| 1,078480432 | 0,40955 | 1,074749173 | 0,04592 | NA | NA |
| 1,170398641 | 0,16342 | 1,145517898 | 0,01807 | NA | NA |
| 1,150291893 | 0,12891 | 1,227735684 | 0,01024 | NA | NA |
| 1,041021598 | 0,61373 | 1,111108729 | 0,00427 | NA | NA |
| 1,002081605 | 0,97543 | 1,084477409 | 0,02014 | NA | NA |
| 1,079228237 | 0,39048 | 1,092020546 | 0,03944 | NA | NA |
| 1,108032348 | 0,31269 | 1,185092771 | 0,00119 | NA | NA |
| 0,883315051 | 0,23898 | 0,879039561 | 0,02999 | NA | NA |
| 1,104964485 | 0,36185 | 1,106497353 | 0,00748 | NA | NA |
| 0,979420298 | 0,84731 | 0,837987135 | 0,01785 | NA | NA |
| 1,165541198 | 0,12126 | 1,163926534 | 0,01854 | NA | NA |
| 1,169587664 | 0,0575  | 1,163120042 | 0,00094 | NA | NA |
| 0,787853886 | 0,28031 | 0,730522189 | 0,00348 | NA | NA |
| 1,204972315 | 0,11205 | 1,132883885 | 0,04844 | NA | NA |
| 1,000693387 | 0,99289 | 0,928516852 | 0,04242 | NA | NA |
| 1,111108729 | 0,1352  | 1,127400412 | 0,0477  | NA | NA |
| 1,105730653 | 0,36381 | 1,207480591 | 0,00406 | NA | NA |
| 1,066585781 | 0,48907 | 1,151089491 | 0,01137 | NA | NA |
| 1,133669413 | 0,26028 | 1,226884977 | 0,00166 | NA | NA |
| 1,071030823 | 0,44967 | 1,279872414 | 0,00057 | NA | NA |
| 0,953959551 | 0,52376 | 0,90062598  | 0,01631 | NA | NA |
| 1,219255094 | 0,15001 | 1,216722359 | 0,04247 | NA | NA |
| 1,035264924 | 0,58724 | 1,099616149 | 0,01741 | NA | NA |
| 1,098854218 | 0,31873 | 1,231998073 | 0,00176 | NA | NA |
| 1,051172909 | 0,53776 | 1,110338834 | 0,02721 | NA | NA |
| 1,136029265 | 0,1496  | 1,135242102 | 0,00723 | NA | NA |
| 1,123499903 | 0,41797 | 1,139973273 | 0,02816 | NA | NA |
| 1,043911927 | 0,48175 | 1,22010051  | 0,00147 | NA | NA |
| 1,069547088 | 0,60768 | 1,187559666 | 0,01179 | NA | NA |
| 0,791685866 | 0,07123 | 0,853226098 | 0,0181  | NA | NA |
| 0,988970916 | 0,8809  | 1,198309021 | 0,01181 | NA | NA |
| 1,237990291 | 0,05877 | 1,2397077   | 0,00048 | NA | NA |
| 1,008352455 | 0,929   | 1,114193651 | 0,01572 | NA | NA |
| 0,974679631 | 0,79553 | 1,115739322 | 0,03972 | NA | NA |
| 1,070288698 | 0,69327 | 1,158292806 | 0,04027 | NA | NA |
| 1,082224645 | 0,38167 | 1,125058485 | 0,04202 | NA | NA |
| 1,136816973 | 0,19477 | 1,110338834 | 0,02051 | NA | NA |
| 0,936272247 | 0,49069 | 1,171210181 | 0,00425 | NA | NA |
| 1,030253954 | 0,62774 | 1,084477409 | 0,02267 | NA | NA |
| 1,117287138 | 0,10503 | 1,102669163 | 0,01581 | NA | NA |
| 0,891928519 | 0,28187 | 0,844400887 | 0,01233 | NA | NA |
| 1,147902414 | 0,14543 | 1,113421618 | 0,02142 | NA | NA |
| 1,016070143 | 0,86849 | 1,121943481 | 0,04517 | NA | NA |

|             |         |             |         |    |    |
|-------------|---------|-------------|---------|----|----|
| 0,971307496 | 0,69745 | 0,877213549 | 0,01721 | NA | NA |
| 0,839149637 | 0,06151 | 0,893785162 | 0,01065 | NA | NA |
| 0,858565436 | 0,3114  | 0,885767519 | 0,02461 | NA | NA |
| 1,183451022 | 0,10389 | 1,175276328 | 0,02173 | NA | NA |
| 1,189207115 | 0,06435 | 1,215879283 | 0,00004 | NA | NA |
| 1,124278924 | 0,13761 | 1,111879158 | 0,04394 | NA | NA |
| 0,843815796 | 0,07631 | 0,751059963 | 0,0001  | NA | NA |
| 1,010451446 | 0,88609 | 1,108032348 | 0,04432 | NA | NA |
| 1,021012126 | 0,80024 | 0,85086373  | 0,00692 | NA | NA |
| 0,921464186 | 0,39724 | 0,898755127 | 0,01455 | NA | NA |
| 0,943438251 | 0,83079 | 1,230291345 | 0,00256 | NA | NA |
| 0,929804943 | 0,68681 | 0,817335328 | 0,00284 | NA | NA |
| 1,314031627 | 0,24598 | 1,345367209 | 0,00133 | NA | NA |
| 0,959929261 | 0,67994 | 1,108800644 | 0,03727 | NA | NA |
| 1,388955136 | 0,09106 | 1,370782805 | 0,00001 | NA | NA |
| 0,852044095 | 0,09836 | 0,828170661 | 0,00397 | NA | NA |
| 1,217566019 | 0,30966 | 1,599920257 | 0,00474 | NA | NA |
| 0,859756486 | 0,2088  | 0,836826243 | 0,00038 | NA | NA |
| 1,390881972 | 0,10715 | 1,393777239 | 0,00268 | NA | NA |
| 1,009051634 | 0,91338 | 1,151089491 | 0,02845 | NA | NA |
| 0,744322628 | 0,1017  | 0,718968266 | 0,00036 | NA | NA |
| 1,459200344 | 0,53178 | 2,391639594 | 0,00814 | NA | NA |
| 1,665551542 | 0,06814 | 1,808758755 | 0,00174 | NA | NA |
| 1,088997015 | 0,75485 | 1,420107359 | 0,00026 | NA | NA |
| 1,617762697 | 0,05551 | 1,69466487  | 0,00424 | NA | NA |
| 1,412254404 | 0,05648 | 1,449946833 | 0,001   | NA | NA |
| 1,143930973 | 0,28815 | 1,169587664 | 0,01952 | NA | NA |
| 1,215036792 | 0,14657 | 1,155886707 | 0,01618 | NA | NA |
| 1,279872414 | 0,32375 | 1,583371732 | 0,00289 | NA | NA |
| 1,275444392 | 0,08635 | 1,198309021 | 0,01742 | NA | NA |
| 0,922103118 | 0,6777  | 1,132098902 | 0,04584 | NA | NA |
| 0,812252396 | 0,37979 | 0,740719899 | 0,01795 | NA | NA |
| 0,941478465 | 0,33871 | 0,905006463 | 0,03301 | NA | NA |
| 1,168777249 | 0,53623 | 2,209994089 | 0,02063 | NA | NA |
| 0,968618189 | 0,82198 | 1,178539408 | 0,04794 | NA | NA |
| 0,804408371 | 0,37655 | 0,635956503 | 0,00004 | NA | NA |
| 1,131314463 | 0,15673 | 1,23370717  | 0,00313 | NA | NA |
| 0,886381699 | 0,53192 | 0,677362489 | 0,00203 | NA | NA |
| 1,119612889 | 0,2763  | 1,172022284 | 0,00996 | NA | NA |
| 0,752101876 | 0,06543 | 0,763658749 | 0,04565 | NA | NA |
| 1,119612889 | 0,27876 | 1,226884977 | 0,00168 | NA | NA |
| 0,990342872 | 0,9164  | 1,137605228 | 0,02069 | NA | NA |
| 1,096571589 | 0,3768  | 1,172834949 | 0,02992 | NA | NA |
| 0,925946023 | 0,66922 | 1,159899655 | 0,00635 | NA | NA |
| 1,125838586 | 0,33979 | 1,190031696 | 0,00385 | NA | NA |
| 1,033830736 | 0,71549 | 1,114193651 | 0,0222  | NA | NA |
| 1,025267238 | 0,87715 | 1,260503392 | 0,00317 | NA | NA |
| 1,142346247 | 0,24432 | 1,167967395 | 0,00179 | NA | NA |
| 0,828744904 | 0,15215 | 0,884540435 | 0,03763 | NA | NA |
| 1,386069886 | 0,05423 | 1,192508872 | 0,00188 | NA | NA |
| 1,137605228 | 0,24371 | 1,229438867 | 0,00041 | NA | NA |
| 1,017479692 | 0,85516 | 1,238848698 | 0,00402 | NA | NA |
| 1,036701101 | 0,69729 | 1,153485605 | 0,01347 | NA | NA |
| 1,02313747  | 0,74773 | 1,124278924 | 0,04299 | NA | NA |
| 1,076240125 | 0,37777 | 1,235418637 | 0,02727 | NA | NA |
| 0,885767519 | 0,67384 | 1,370782805 | 0,00047 | NA | NA |
| 0,984184022 | 0,82949 | 1,145517898 | 0,01512 | NA | NA |
| 1,172834949 | 0,05188 | 1,191682575 | 0,00969 | NA | NA |
| 1,195819797 | 0,12808 | 1,167158102 | 0,02126 | NA | NA |
| 1,205807828 | 0,05332 | 1,119612889 | 0,02649 | NA | NA |
| 1,004167543 | 0,975   | 1,312211255 | 0,01506 | NA | NA |
| 0,742261785 | 0,41145 | 0,831622098 | 0,0029  | NA | NA |
| 0,815637493 | 0,19832 | 0,837987135 | 0,00804 | NA | NA |
| 1,149494848 | 0,53099 | 1,295940965 | 0,00311 | NA | NA |
| 1,306765254 | 0,30629 | 2,089271526 | 0,00089 | NA | NA |
| 0,907519155 | 0,78097 | 1,43296165  | 0,00032 | NA | NA |
| 1,446934886 | 0,56387 | 2,524504064 | 0,00818 | NA | NA |
| 0,709561678 | 0,18615 | 0,712025098 | 0,0112  | NA | NA |
| 0,994470169 | 0,97851 | 1,301341855 | 0,00588 | NA | NA |
| 1,4063932   | 0,05998 | 1,423063461 | 0,00828 | NA | NA |
| 0,927873476 | 0,61479 | 0,835666959 | 0,02154 | NA | NA |
| 0,981459064 | 0,93129 | 1,309485423 | 0,00326 | NA | NA |
| 0,960594864 | 0,65638 | 0,85086373  | 0,00549 | NA | NA |
| 0,682546859 | 0,06515 | 0,816768991 | 0,00268 | NA | NA |
| 1,128964405 | 0,09158 | 1,172022284 | 0,0137  | NA | NA |
| 1,21335356  | 0,18498 | 1,125838586 | 0,02179 | NA | NA |
| 1,087488391 | 0,49713 | 1,227735684 | 0,01762 | NA | NA |
| 1,092020546 | 0,444   | 1,081474763 | 0,02886 | NA | NA |
| 1,048262476 | 0,72132 | 0,854409741 | 0,01381 | NA | NA |
| 1,025267238 | 0,72704 | 0,852634892 | 0,02963 | NA | NA |
| 1,059218335 | 0,50821 | 1,241427492 | 0,00237 | NA | NA |
| 0,967947027 | 0,86072 | 1,245737416 | 0,01656 | NA | NA |
| 1,146312186 | 0,6698  | 0,808881348 | 0,04626 | NA | NA |
| 1,382232207 | 0,07234 | 1,308578071 | 0,00334 | NA | NA |
| 1,140763716 | 0,11622 | 1,111108729 | 0,01607 | NA | NA |
| 1,360370852 | 0,15702 | 1,366987452 | 0,01882 | NA | NA |
| 1,146312186 | 0,44495 | 1,274560627 | 0,03256 | NA | NA |
| 1,120389214 | 0,09789 | 1,154285418 | 0,00536 | NA | NA |
| 1,02313747  | 0,94611 | 1,785093943 | 0,00134 | NA | NA |
| 1,062895674 | 0,49657 | 1,097331938 | 0,03684 | NA | NA |
| 2,581124981 | 0,0572  | 4,462957289 | 0,00004 | NA | NA |
| 1,344434994 | 0,67844 | 2,633533844 | 0,00567 | NA | NA |
| 1,483494934 | 0,51888 | 2,406606052 | 0,00888 | NA | NA |
| 1,212512819 | 0,29887 | 1,497960934 | 0,02742 | NA | NA |
| 0,755759964 | 0,05476 | 0,815072332 | 0,01418 | NA | NA |
| 0,780786493 | 0,13761 | 0,690637224 | 0,00009 | NA | NA |
| 1,207480591 | 0,38819 | 1,317679952 | 0,02049 | NA | NA |
| 1,052631155 | 0,80887 | 0,865136691 | 0,00735 | NA | NA |
| 0,8962667   | 0,27253 | 0,816768991 | 0,01297 | NA | NA |
| 0,61813763  | 0,22552 | 0,845572287 | 0,01599 | NA | NA |
| 0,8962667   | 0,77204 | 1,569168196 | 0,00947 | NA | NA |
| 1,150291893 | 0,23645 | 1,261377409 | 0,00735 | NA | NA |
| 1,104198847 | 0,39991 | 0,885153765 | 0,03804 | NA | NA |
| 0,812252396 | 0,54917 | 0,758909626 | 0,00495 | NA | NA |

|             |         |             |         |    |
|-------------|---------|-------------|---------|----|
| 0,816768991 | 0,32766 | 0,820741609 | 0,00935 | NA |
| 0,621144141 | 0,09414 | 0,76154437  | 0,00207 | NA |
| 0,977385766 | 0,82647 | 1,160703914 | 0,03041 | NA |
| 1,17609125  | 0,13598 | 1,159899655 | 0,04979 | NA |
| 1,073260286 | 0,69593 | 1,366987452 | 0,00077 | NA |
| 0,936272247 | 0,56343 | 0,852044095 | 0,00393 | NA |
| 1,025978145 | 0,83494 | 1,182631    | 0,02872 | NA |
| 1,057018041 | 0,64564 | 1,303147149 | 0,00077 | NA |
| 0,783497187 | 0,25799 | 0,7944344   | 0,00011 | NA |
| 1,190856849 | 0,24815 | 1,440929749 | 0,00375 | NA |
| 1,01395948  | 0,86294 | 0,895025071 | 0,0093  | NA |
| 1,163926534 | 0,18262 | 1,115739322 | 0,02875 | NA |
| 0,892546971 | 0,51523 | 0,853817714 | 0,00469 | NA |
| 0,704172113 | 0,10638 | 0,768970416 | 0,00551 | NA |
| 0,763129604 | 0,22599 | 0,87539133  | 0,04499 | NA |
| 0,890075733 | 0,16401 | 1,111108729 | 0,0418  | NA |
| 0,821310701 | 0,06628 | 0,747424624 | 0,00002 | NA |
| 0,910669834 | 0,30273 | 1,111879158 | 0,03502 | NA |
| 1,030253954 | 0,75525 | 1,16634937  | 0,03291 | NA |
| 1,515716567 | 0,42238 | 2,097978655 | 0,0109  | NA |
| 1,110338834 | 0,32073 | 0,919550046 | 0,03539 | NA |
| 1           | 0,99969 | 1,308578071 | 0,022   | NA |
| 1,038139271 | 0,72044 | 1,180174343 | 0,03213 | NA |
| 1,433955248 | 0,09721 | 1,991699506 | 0,00103 | NA |
| 0,798298386 | 0,28219 | 0,843815796 | 0,03765 | NA |
| 0,558643569 | 0,16352 | 0,805524291 | 0,02288 | NA |
| 0,787307977 | 0,29561 | 1,235418637 | 0,00152 | NA |
| 0,538120062 | 0,05375 | 0,457549584 | 0       | NA |
| 1,28788163  | 0,06741 | 1,237990291 | 0,00418 | NA |
| 1,421092043 | 0,20778 | 2,168954818 | 0,00012 | NA |
| 1,073260286 | 0,37122 | 1,131314463 | 0,01726 | NA |
| 0,616853585 | 0,0887  | 0,710546022 | 0,00141 | NA |
| 1,109569472 | 0,2052  | 0,904379378 | 0,02974 | NA |
| 1,599920257 | 0,05257 | 1,356604327 | 0,01013 | NA |
| 0,74277646  | 0,10432 | 0,791685866 | 0,00096 | NA |
| 1,125838586 | 0,16411 | 1,114966219 | 0,04175 | NA |
| 1,250062303 | 0,06761 | 1,25962998  | 0,00133 | NA |
| 0,926588062 | 0,69546 | 0,806082831 | 0,01991 | NA |
| 0,812815602 | 0,40466 | 0,716977624 | 0,0008  | NA |
| 1,781385801 | 0,23714 | 3,140512475 | 0,00069 | NA |
| 1,108800644 | 0,40526 | 1,184271612 | 0,03192 | NA |
| 1,053361036 | 0,58343 | 1,146312186 | 0,00131 | NA |
| 1,114966219 | 0,42659 | 1,342572503 | 0,0316  | NA |
| 0,765248385 | 0,57091 | 1,424050196 | 0,00043 | NA |
| 0,87417862  | 0,60613 | 0,79940583  | 0,04103 | NA |
| 0,76101669  | 0,15834 | 0,838568184 | 0,01673 | NA |
| 0,664803554 | 0,13165 | 0,899378312 | 0,03897 | NA |
| 1,089752112 | 0,27962 | 1,21167266  | 0,00088 | NA |
| 1,102669163 | 0,34534 | 1,222640278 | 0,00284 | NA |
| 1,081474763 | 0,53193 | 1,22603486  | 0,00583 | NA |
| 0,950659101 | 0,7788  | 0,742261785 | 0,00313 | NA |
| 0,648869383 | 0,16294 | 0,61429349  | 0,00001 | NA |
| 1,2397077   | 0,16871 | 1,282536603 | 0,00626 | NA |
| 1,088997015 | 0,35019 | 0,879649076 | 0,01367 | NA |
| 0,880259014 | 0,48795 | 0,774855931 | 0,01594 | NA |
| 1,069547088 | 0,41504 | 1,224336392 | 0,00096 | NA |
| 1,356604327 | 0,10454 | 1,903955817 | 0,00068 | NA |
| 0,897510051 | 0,48773 | 0,872967591 | 0,02238 | NA |
| 0,904379378 | 0,36593 | 1,10343374  | 0,04692 | NA |
| 0,713507253 | 0,13312 | 0,555554364 | 0,00012 | NA |
| 0,947370071 | 0,41082 | 0,912565489 | 0,02323 | NA |
| 0,955945318 | 0,62816 | 1,102669163 | 0,01996 | NA |
| 1,079228237 | 0,78761 | 0,717972255 | 0,0009  | NA |
| 0,889458994 | 0,20418 | 0,84323111  | 0,02182 | NA |
| 1,126619228 | 0,19718 | 1,312211255 | 0,00004 | NA |
| 1,167158102 | 0,26021 | 1,155886707 | 0,00987 | NA |
| 1,199139914 | 0,19132 | 1,196648963 | 0,01052 | NA |
| 1,00556058  | 0,96563 | 1,101141598 | 0,03826 | NA |
| 0,899378312 | 0,20952 | 0,894404902 | 0,03746 | NA |
| 1,171210181 | 0,08988 | 1,226884977 | 0,00386 | NA |
| 1,048262476 | 0,60398 | 1,122721422 | 0,00839 | NA |
| 1,002081605 | 0,98013 | 1,152686347 | 0,01149 | NA |
| 0,815072332 | 0,21335 | 0,72597914  | 0,00079 | NA |
| 1,072516617 | 0,51622 | 1,140763716 | 0,0258  | NA |
| 0,991029563 | 0,94498 | 1,29145735  | 0,00053 | NA |
| 0,965267025 | 0,79757 | 1,192508872 | 0,00516 | NA |
| 0,891310496 | 0,5829  | 0,697371833 | 0,00249 | NA |
| 0,974004269 | 0,84605 | 0,77271055  | 0,00011 | NA |
| 1,186736798 | 0,07261 | 1,22858698  | 0,0078  | NA |
| 1,164733586 | 0,10205 | 1,172834949 | 0,01349 | NA |
| 1,139183377 | 0,32441 | 1,105730653 | 0,04004 | NA |
| 0,874784765 | 0,26556 | 0,76101669  | 0,00023 | NA |
| 1,251796459 | 0,05035 | 1,245737416 | 0,00753 | NA |
| 0,869947353 | 0,20255 | 0,845572287 | 0,03185 | NA |
| 1,043911927 | 0,6691  | 1,110338834 | 0,04629 | NA |
| 0,986232704 | 0,85787 | 1,128182137 | 0,04596 | NA |
| 1,041743429 | 0,681   | 1,153485605 | 0,02311 | NA |
| 1,120389214 | 0,1236  | 1,156688184 | 0,0135  | NA |
| 1,165541198 | 0,23046 | 1,149494848 | 0,01252 | NA |
| 1,178539408 | 0,10948 | 1,145517898 | 0,01387 | NA |
| 0,944092419 | 0,51883 | 0,852634892 | 0,03777 | NA |
| 1,139973273 | 0,1227  | 1,194991205 | 0,01071 | NA |
| 1,176906737 | 0,06334 | 1,088242442 | 0,04379 | NA |
| 0,918912883 | 0,41758 | 0,886996305 | 0,03852 | NA |
| 1,257884972 | 0,07213 | 1,151887642 | 0,03878 | NA |
| 1,093535457 | 0,31724 | 1,10343374  | 0,0184  | NA |
| 0,881480158 | 0,43652 | 0,87417862  | 0,0152  | NA |
| 1,058484395 | 0,58327 | 1,141554707 | 0,00909 | NA |
| 1,060687741 | 0,79859 | 0,839149637 | 0,02026 | NA |
| 1,170398641 | 0,17449 | 0,883315051 | 0,00963 | NA |
| 1,188383105 | 0,19739 | 1,250062303 | 0,00539 | NA |
| 0,73153561  | 0,10936 | 0,733566672 | 0,01374 | NA |
| 0,922742493 | 0,73911 | 0,595015848 | 0,00002 | NA |
| 0,906261938 | 0,31002 | 0,8362464   | 0,01427 | NA |

|             |         |             |         |    |    |
|-------------|---------|-------------|---------|----|----|
| 1,027401439 | 0,88532 | 1,162314108 | 0,02451 | NA | NA |
| 1,095811766 | 0,41581 | 1,111108729 | 0,03905 | NA | NA |
| 1,25353302  | 0,11992 | 1,199139914 | 0,02549 | NA | NA |
| 1,048262476 | 0,55011 | 1,140763716 | 0,04864 | NA | NA |
| 1,025978145 | 0,72074 | 1,181811547 | 0,01773 | NA | NA |
| 0,820172911 | 0,42372 | 0,695440986 | 0,00062 | NA | NA |
| 0,867538687 | 0,14864 | 0,868742185 | 0,04001 | NA | NA |
| 1,097331938 | 0,19073 | 1,146312186 | 0,02847 | NA | NA |
| 1,0238469   | 0,75568 | 1,114966219 | 0,03089 | NA | NA |
| 0,852044095 | 0,3469  | 0,782954296 | 0,01626 | NA | NA |
| 0,602486157 | 0,13226 | 0,81056512  | 0,02865 | NA | NA |
| 0,946057647 | 0,48166 | 1,125838586 | 0,02022 | NA | NA |
| 0,922103118 | 0,26174 | 0,931740429 | 0,03491 | NA | NA |
| 1,051172909 | 0,70394 | 1,379360922 | 0,02159 | NA | NA |
| 1,002776436 | 0,97942 | 1,193335743 | 0,02344 | NA | NA |
| 1,059952783 | 0,36414 | 1,217566019 | 0,01754 | NA | NA |
| 0,704660378 | 0,22811 | 0,84264683  | 0,02476 | NA | NA |
| 0,848507902 | 0,05859 | 0,891310496 | 0,0303  | NA | NA |
| 1,143138335 | 0,17785 | 1,191682575 | 0,01913 | NA | NA |
| 1,151089491 | 0,29913 | 1,167158102 | 0,00846 | NA | NA |
| 2,360348687 | 0,05819 | 4,00832642  | 0,00009 | NA | NA |
| 1,028826708 | 0,77386 | 1,125058485 | 0,03047 | NA | NA |
| 0,831045862 | 0,07041 | 0,884540435 | 0,02118 | NA | NA |
| 0,954621014 | 0,44263 | 0,899378312 | 0,0453  | NA | NA |
| 1,0181852   | 0,77959 | 0,934327347 | 0,04747 | NA | NA |
| 1,058484395 | 0,48857 | 1,180992661 | 0,00991 | NA | NA |
| 0,998614666 | 0,99461 | 1,43893358  | 0,01195 | NA | NA |
| 1,0238469   | 0,77282 | 1,132883885 | 0,03018 | NA | NA |
| 1,012554807 | 0,89573 | 1,194163187 | 0,02366 | NA | NA |
| 1,10343374  | 0,24158 | 1,106497353 | 0,03652 | NA | NA |
| 0,936921447 | 0,33441 | 1,117287138 | 0,04073 | NA | NA |
| 1,024556823 | 0,79335 | 1,127400412 | 0,03723 | NA | NA |
| 1,00765376  | 0,962   | 0,872362706 | 0,02241 | NA | NA |
| 1,25962998  | 0,10327 | 1,173648178 | 0,04278 | NA | NA |
| 0,787853886 | 0,10234 | 0,828170661 | 0,01845 | NA | NA |
| 1,164733586 | 0,22562 | 1,120389214 | 0,04635 | NA | NA |
| 0,991716731 | 0,939   | 1,158292806 | 0,0204  | NA | NA |
| 0,968618189 | 0,84167 | 1,317679952 | 0,00047 | NA | NA |
| 0,955945318 | 0,49326 | 1,241427492 | 0,00049 | NA | NA |
| 1,098092814 | 0,30492 | 1,185914499 | 0,00303 | NA | NA |
| 1,246601194 | 0,07086 | 1,261377409 | 0,00474 | NA | NA |
| 0,837987135 | 0,08056 | 0,789493887 | 0,00014 | NA | NA |
| 1,106497353 | 0,31733 | 1,116512962 | 0,04822 | NA | NA |
| 1,114966219 | 0,18128 | 1,076240125 | 0,0475  | NA | NA |
| 0,827023368 | 0,33675 | 0,704172113 | 0,00843 | NA | NA |
| 1,159899655 | 0,05707 | 1,160703914 | 0,01682 | NA | NA |
| 1,167158102 | 0,11072 | 1,244874235 | 0,00576 | NA | NA |
| 1,10343374  | 0,27344 | 1,153485605 | 0,00924 | NA | NA |
| 1,219255094 | 0,10741 | 1,327765158 | 0,00017 | NA | NA |
| 1,094293701 | 0,36655 | 1,095811766 | 0,02105 | NA | NA |
| 0,813943185 | 0,15089 | 0,821310701 | 0,00215 | NA | NA |
| 1,063632673 | 0,49381 | 1,178539408 | 0,03518 | NA | NA |
| 1,131314463 | 0,21563 | 1,106497353 | 0,04954 | NA | NA |
| 0,859756486 | 0,1179  | 0,84264683  | 0,00746 | NA | NA |
| 1,009051634 | 0,92338 | 1,102669163 | 0,02469 | NA | NA |
| 0,856188285 | 0,29674 | 0,867538687 | 0,02529 | NA | NA |
| 1,25962998  | 0,05971 | 1,359428242 | 0,0011  | NA | NA |
| 1,104198847 | 0,41155 | 1,333298677 | 0,03359 | NA | NA |
| 1,097331938 | 0,34602 | 1,099616149 | 0,03074 | NA | NA |
| 1,0238469   | 0,84577 | 1,180992661 | 0,0047  | NA | NA |
| 1,113421618 | 0,25043 | 1,159095952 | 0,00687 | NA | NA |
| 1,210833084 | 0,14432 | 0,898132373 | 0,02715 | NA | NA |
| 1,304050735 | 0,57926 | 2,624422509 | 0,00023 | NA | NA |
| 1,0132569   | 0,94825 | 1,339783602 | 0,02998 | NA | NA |
| 1,254402205 | 0,08365 | 1,223488041 | 0,00145 | NA | NA |
| 1,139183377 | 0,17493 | 1,147902414 | 0,00534 | NA | NA |
| 1,311302014 | 0,07015 | 1,203303026 | 0,0173  | NA | NA |
| 1,097331938 | 0,34929 | 1,165541198 | 0,00353 | NA | NA |
| 1,17772279  | 0,21523 | 1,200803427 | 0,00444 | NA | NA |
| 0,987600861 | 0,90385 | 1,100378609 | 0,02563 | NA | NA |
| 1,423063461 | 0,07737 | 1,396678532 | 0,00873 | NA | NA |
| 1,215879283 | 0,05823 | 1,264879542 | 0,00056 | NA | NA |
| 1,118061851 | 0,32159 | 1,21167266  | 0,01129 | NA | NA |
| 1,027401439 | 0,76467 | 1,092777739 | 0,04846 | NA | NA |
| 0,872362706 | 0,29134 | 0,823591017 | 0,00223 | NA | NA |
| 1,0132569   | 0,92287 | 0,86154616  | 0,00464 | NA | NA |
| 1,208317843 | 0,11735 | 1,17609125  | 0,04319 | NA | NA |
| 0,790041312 | 0,15171 | 0,793883931 | 0,00014 | NA | NA |
| 2,507066041 | 0,05276 | 3,845043714 | 0,00014 | NA | NA |
| 1,094293701 | 0,38289 | 1,190031696 | 0,00492 | NA | NA |
| 0,998614666 | 0,9783  | 0,912565489 | 0,03534 | NA | NA |
| 1,136029265 | 0,25999 | 1,108032348 | 0,02207 | NA | NA |
| 1,390881972 | 0,59075 | 2,339175328 | 0,0105  | NA | NA |
| 0,953959551 | 0,65227 | 1,173648178 | 0,00579 | NA | NA |
| 1,106497353 | 0,21736 | 1,098092814 | 0,03551 | NA | NA |
| 1,059952783 | 0,82901 | 1,236275261 | 0,00434 | NA | NA |
| 1,266634254 | 0,09029 | 1,269270886 | 0,00633 | NA | NA |
| 1,089752112 | 0,16437 | 1,132883885 | 0,01421 | NA | NA |
| 1,040300267 | 0,73391 | 0,882702996 | 0,01034 | NA | NA |
| 0,745355193 | 0,08891 | 0,827023368 | 0,02658 | NA | NA |
| 1,110388834 | 0,1832  | 1,127400412 | 0,00787 | NA | NA |
| 1,204972315 | 0,40718 | 0,79774524  | 0,0006  | NA | NA |
| 0,885767519 | 0,54372 | 0,721464343 | 0,00021 | NA | NA |
| 1,00765376  | 0,92231 | 1,133669413 | 0,04357 | NA | NA |
| 0,921464186 | 0,57919 | 0,758909626 | 0,00002 | NA | NA |
| 0,683967652 | 0,08481 | 0,786217292 | 0,01017 | NA | NA |
| 1,054091423 | 0,58353 | 0,854409741 | 0,04764 | NA | NA |
| 1,085229372 | 0,54332 | 0,885767519 | 0,00736 | NA | NA |
| 0,903752727 | 0,23825 | 0,888226796 | 0,01147 | NA | NA |
| 1,130530567 | 0,12783 | 1,172834949 | 0,02931 | NA | NA |
| 0,838568184 | 0,19278 | 0,824162085 | 0,00115 | NA | NA |
| 0,752623374 | 0,07676 | 0,800514811 | 0,04159 | NA | NA |
| 1,090507733 | 0,48682 | 1,277213759 | 0,00164 | NA | NA |
| 0,988285652 | 0,95074 | 0,790589117 | 0,00365 | NA | NA |

|             |         |             |         |    |    |
|-------------|---------|-------------|---------|----|----|
| 1,021012126 | 0,90137 | 0,874784765 | 0,0449  | NA | NA |
| 0,859756486 | 0,11825 | 0,855595026 | 0,01922 | NA | NA |
| 1,155886707 | 0,2531  | 1,219255094 | 0,00079 | NA | NA |
| 0,866937564 | 0,13545 | 0,90062598  | 0,04761 | NA | NA |
| 0,473356816 | 0,07196 | 0,613867842 | 0,00011 | NA | NA |
| 1,143138335 | 0,14664 | 1,119612889 | 0,0322  | NA | NA |
| 1,051172909 | 0,62361 | 1,189207115 | 0,00198 | NA | NA |
| 0,538866573 | 0,17264 | 0,699792933 | 0,0226  | NA | NA |
| 1,090507733 | 0,32388 | 1,110338834 | 0,03443 | NA | NA |
| 1,068805991 | 0,41717 | 1,098854218 | 0,0488  | NA | NA |
| 0,870550563 | 0,4612  | 0,848507902 | 0,01479 | NA | NA |
| 0,929804943 | 0,49907 | 1,130530567 | 0,02829 | NA | NA |
| 0,85027416  | 0,08595 | 0,8962667   | 0,03195 | NA | NA |
| 0,944747041 | 0,5291  | 0,87539133  | 0,03884 | NA | NA |
| 1,098854218 | 0,32395 | 1,132883885 | 0,04401 | NA | NA |
| 0,944747041 | 0,72488 | 1,153485605 | 0,02079 | NA | NA |
| 1,072516617 | 0,36067 | 1,136816973 | 0,00903 | NA | NA |
| 1,133669413 | 0,11515 | 1,143138335 | 0,04202 | NA | NA |
| 1,07997656  | 0,4222  | 1,124278924 | 0,03942 | NA | NA |
| 1,194991205 | 0,10478 | 1,129747215 | 0,01352 | NA | NA |
| 1,054822317 | 0,58807 | 1,175276328 | 0,00523 | NA | NA |
| 1,028826708 | 0,64658 | 1,088997015 | 0,04415 | NA | NA |
| 0,821310701 | 0,19507 | 0,808320869 | 0,00705 | NA | NA |
| 1,278099363 | 0,09002 | 1,212512819 | 0,00793 | NA | NA |
| 1,0238469   | 0,84089 | 0,88696305  | 0,01194 | NA | NA |
| 1,107264584 | 0,18529 | 1,181811547 | 0,00415 | NA | NA |
| 0,962594443 | 0,62708 | 1,140763716 | 0,02154 | NA | NA |
| 1,106497353 | 0,22106 | 1,087488391 | 0,03015 | NA | NA |
| 1,132883885 | 0,24096 | 1,132883885 | 0,04483 | NA | NA |
| 1,068065408 | 0,55107 | 1,138394029 | 0,01771 | NA | NA |
| 1,138394029 | 0,07234 | 1,095052471 | 0,02597 | NA | NA |
| 1,087488391 | 0,43071 | 1,176906737 | 0,01512 | NA | NA |
| 1,078480432 | 0,56944 | 1,209994089 | 0,04181 | NA | NA |
| 1,041743429 | 0,58544 | 1,107264584 | 0,04353 | NA | NA |
| 1,096571589 | 0,38974 | 1,285206337 | 0,00177 | NA | NA |
| 1,22858698  | 0,05866 | 1,22603486  | 0,00393 | NA | NA |
| 0,959264119 | 0,89434 | 1,623379162 | 0,00063 | NA | NA |
| 0,929804943 | 0,82038 | 1,569168196 | 0,00096 | NA | NA |
| 1,159095952 | 0,13198 | 1,209155676 | 0,01048 | NA | NA |
| 1,224336392 | 0,14568 | 1,277213759 | 0,00288 | NA | NA |
| 1,053361036 | 0,83674 | 1,205807828 | 0,00584 | NA | NA |
| 0,974679631 | 0,82466 | 1,098854218 | 0,04365 | NA | NA |
| 1,387030969 | 0,13453 | 1,494849249 | 0,00034 | NA | NA |
| 0,791685866 | 0,25851 | 0,831045862 | 0,03849 | NA | NA |
| 1,090507733 | 0,50521 | 1,119612889 | 0,04627 | NA | NA |
| 0,885153765 | 0,42112 | 0,885153765 | 0,03124 | NA | NA |
| 1,000693387 | 0,99824 | 0,70514898  | 0,0004  | NA | NA |
| 1,028113827 | 0,7278  | 1,121166078 | 0,04874 | NA | NA |
| 1           | 0,99966 | 0,677832163 | 0,0042  | NA | NA |
| 1,136816973 | 0,68319 | 0,741747467 | 0,02224 | NA | NA |
| 1,00486382  | 0,96082 | 0,892546971 | 0,01959 | NA | NA |
| 1,251796459 | 0,30679 | 0,844986384 | 0,00163 | NA | NA |
| 1,155085785 | 0,148   | 1,173648178 | 0,03027 | NA | NA |
| 1,002081605 | 0,98662 | 1,190856849 | 0,00458 | NA | NA |
| 0,910038824 | 0,66429 | 0,697371833 | 0,01015 | NA | NA |
| 1,010451446 | 0,91528 | 0,880259014 | 0,04493 | NA | NA |
| 0,803850991 | 0,33264 | 0,852634892 | 0,04517 | NA | NA |
| 1,780151467 | 0,05485 | 1,42800398  | 0,01625 | NA | NA |
| 0,959264119 | 0,83386 | 0,775393206 | 0,02441 | NA | NA |
| 1,051901779 | 0,66004 | 1,172834949 | 0,0438  | NA | NA |
| 1,209155676 | 0,10364 | 1,355664327 | 0,00113 | NA | NA |
| 0,975355462 | 0,83311 | 1,092777739 | 0,02693 | NA | NA |
| 1,10343374  | 0,57868 | 1,232852325 | 0,00155 | NA | NA |
| 1,114966219 | 0,19781 | 1,121166078 | 0,0153  | NA | NA |
| 1,335148303 | 0,07382 | 1,489677463 | 0,00288 | NA | NA |
| 0,875998315 | 0,29749 | 0,732550437 | 0       | NA | NA |
| 0,886996305 | 0,25508 | 0,72597914  | 0,00206 | NA | NA |
| 0,738669032 | 0,12842 | 0,860352631 | 0,04079 | NA | NA |
| 1,151887642 | 0,12892 | 1,180992661 | 0,00066 | NA | NA |
| 1,033830736 | 0,76294 | 1,098092814 | 0,03942 | NA | NA |
| 1,141554707 | 0,1129  | 1,154285418 | 0,00444 | NA | NA |
| 1,020304659 | 0,89414 | 0,798851916 | 0,01926 | NA | NA |
| 1,161508732 | 0,16341 | 1,219255094 | 0,00665 | NA | NA |
| 1,105730653 | 0,47724 | 1,342572503 | 0,0089  | NA | NA |
| 1,097331938 | 0,26332 | 1,096571589 | 0,03899 | NA | NA |
| 1,137605228 | 0,1246  | 1,085981856 | 0,04663 | NA | NA |
| 1,16634937  | 0,09289 | 1,286989247 | 0,00129 | NA | NA |
| 0,969289817 | 0,67661 | 0,906261938 | 0,02323 | NA | NA |
| 1,261377409 | 0,05106 | 1,109569472 | 0,04899 | NA | NA |
| 1,068805991 | 0,33243 | 1,16634937  | 0,00103 | NA | NA |
| 1,065108203 | 0,66669 | 1,139183377 | 0,03539 | NA | NA |
| 0,997231251 | 0,97871 | 1,148698355 | 0,00955 | NA | NA |
| 1,018891197 | 0,78414 | 1,131314463 | 0,0151  | NA | NA |
| 0,821880187 | 0,12758 | 0,792234811 | 0,00649 | NA | NA |
| 0,994470169 | 0,96285 | 0,893165852 | 0,04656 | NA | NA |
| 1,07549439  | 0,26897 | 1,122721422 | 0,01426 | NA | NA |
| 1,011152081 | 0,90695 | 1,184271612 | 0,00106 | NA | NA |
| 1,074004472 | 0,37614 | 1,185092771 | 0,02885 | NA | NA |
| 1,026689546 | 0,82588 | 1,221793102 | 0,01886 | NA | NA |
| 1,133669413 | 0,13688 | 1,150291893 | 0,03458 | NA | NA |
| 0,692074858 | 0,09394 | 0,782411782 | 0,00245 | NA | NA |
| 0,750019495 | 0,14542 | 0,841479482 | 0,04303 | NA | NA |
| 0,809442217 | 0,25698 | 0,76154437  | 0,00457 | NA | NA |
| 0,865136691 | 0,66502 | 1,503161478 | 0,00143 | NA | NA |
| 0,66296288  | 0,36787 | 0,632001549 | 0,00006 | NA | NA |
| 0,792784137 | 0,23208 | 0,779704843 | 0,01909 | NA | NA |
| 0,744322628 | 0,10884 | 0,765778999 | 0,00407 | NA | NA |
| 0,866937564 | 0,28146 | 0,815637493 | 0,02126 | NA | NA |
| 0,582770599 | 0,09587 | 0,742261785 | 0       | NA | NA |
| 0,791685866 | 0,3026  | 0,841479482 | 0,01776 | NA | NA |
| 0,76950361  | 0,06401 | 0,788400174 | 0,00025 | NA | NA |
| 0,758383773 | 0,10266 | 0,793883931 | 0,00406 | NA | NA |
| 0,824162085 | 0,3133  | 0,824162085 | 0,0185  | NA | NA |
| 0,897510051 | 0,61789 | 0,805524291 | 0,00397 | NA | NA |



|             |         |             |         |    |    |
|-------------|---------|-------------|---------|----|----|
| 0,963261894 | 0,71758 | 0,765778999 | 0,01127 | NA | NA |
| 0,866937564 | 0,35391 | 0,735093668 | 0,00507 | NA | NA |
| 0,771640088 | 0,09565 | 0,77916458  | 0,00872 | NA | NA |
| 0,85797053  | 0,16791 | 0,784040454 | 0,00534 | NA | NA |
| 0,693515485 | 0,23512 | 0,839149637 | 0,00867 | NA | NA |
| 0,890075733 | 0,51177 | 0,856781955 | 0,01996 | NA | NA |
| 0,849096246 | 0,27008 | 0,831622098 | 0,04118 | NA | NA |
| 0,953959551 | 0,66192 | 0,815072332 | 0,00038 | NA | NA |
| 0,889458994 | 0,56919 | 1,128182137 | 0,03607 | NA | NA |
| 0,966606097 | 0,83855 | 1,17772279  | 0,01453 | NA | NA |
| 1,187559666 | 0,25426 | 1,301341855 | 0,00328 | NA | NA |
| 1,104964485 | 0,29094 | 1,176906737 | 0,04241 | NA | NA |
| 1,193335743 | 0,08014 | 1,146312186 | 0,00924 | NA | NA |
| 0,721964598 | 0,23726 | 0,713507253 | 0,00372 | NA | NA |
| 0,910038824 | 0,66103 | 0,687294348 | 0,00052 | NA | NA |
| 0,814507563 | 0,1674  | 0,845572287 | 0,02046 | NA | NA |
| 0,924663278 | 0,58132 | 0,759435845 | 0,01299 | NA | NA |
| 1,158292806 | 0,60473 | 0,840313752 | 0,01611 | NA | NA |
| 0,96996191  | 0,87462 | 0,807760778 | 0,0422  | NA | NA |
| 0,959929261 | 0,7046  | 1,175276328 | 0,01567 | NA | NA |
| 0,934327347 | 0,65256 | 0,681601304 | 0,00287 | NA | NA |
| 0,732042848 | 0,12964 | 0,76101669  | 0,01802 | NA | NA |
| 0,882702996 | 0,20366 | 0,755236293 | 0,00038 | NA | NA |
| 1,235418637 | 0,20111 | 1,414213562 | 0,0131  | NA | NA |
| 1,309485423 | 0,12774 | 1,289668251 | 0,00843 | NA | NA |
| 0,860352631 | 0,37281 | 0,846745312 | 0,01282 | NA | NA |
| 0,651573575 | 0,07463 | 0,856188285 | 0,0404  | NA | NA |
| 1,051901779 | 0,74863 | 0,767373048 | 0,00422 | NA | NA |
| 0,840896415 | 0,30923 | 0,849096246 | 0,03488 | NA | NA |
| 0,669427628 | 0,07363 | 0,710053679 | 0,00326 | NA | NA |
| 1,178539408 | 0,06085 | 1,142346247 | 0,03997 | NA | NA |
| 1,139973273 | 0,43025 | 1,168777249 | 0,04282 | NA | NA |
| 0,908778116 | 0,67612 | 0,745872013 | 0,00011 | NA | NA |
| 0,78132788  | 0,1991  | 0,901875378 | 0,02628 | NA | NA |
| 0,770571108 | 0,16434 | 0,76154437  | 0,00001 | NA | NA |
| 1,300440147 | 0,32232 | 1,29056249  | 0,02651 | NA | NA |
| 1,041021598 | 0,79315 | 0,827023368 | 0,00928 | NA | NA |
| 0,779704843 | 0,12393 | 0,773782497 | 0,00357 | NA | NA |
| 0,844986384 | 0,37708 | 0,804408371 | 0,00875 | NA | NA |
| 0,688725023 | 0,07339 | 0,826450318 | 0,00388 | NA | NA |
| 0,971307496 | 0,87347 | 0,741747467 | 0       | NA | NA |
| 0,786762445 | 0,38607 | 0,733566672 | 0,00498 | NA | NA |
| 1,115739322 | 0,62043 | 0,802181166 | 0,0048  | NA | NA |
| 1,098854218 | 0,76246 | 1,263127262 | 0,00365 | NA | NA |
| 0,74277646  | 0,24867 | 0,799960128 | 0,01758 | NA | NA |
| 1,076986376 | 0,46584 | 1,140763716 | 0,024   | NA | NA |
| 1,065846736 | 0,55765 | 1,130530567 | 0,01689 | NA | NA |
| 1,094293701 | 0,52286 | 1,187559666 | 0,00856 | NA | NA |
| 0,732042848 | 0,36028 | 0,833931044 | 0,0257  | NA | NA |
| 0,925304428 | 0,29449 | 0,880259014 | 0,02443 | NA | NA |
| 0,995159722 | 0,95139 | 1,121166078 | 0,03713 | NA | NA |
| 0,89564567  | 0,56031 | 0,844986384 | 0,0453  | NA | NA |
| 0,997922719 | 0,98625 | 1,126619228 | 0,04764 | NA | NA |
| 1,490710387 | 0,07743 | 1,332374825 | 0,00312 | NA | NA |
| 0,828744904 | 0,31741 | 0,729004689 | 0,00001 | NA | NA |
| 1,161508732 | 0,45144 | 0,794985251 | 0,01146 | NA | NA |
| 1,095052471 | 0,27558 | 1,207480591 | 0,00366 | NA | NA |
| 1,054091423 | 0,831   | 0,807201075 | 0,0141  | NA | NA |
| 0,90000193  | 0,6606  | 0,732042848 | 0,00168 | NA | NA |
| 1,180992661 | 0,09156 | 1,124278924 | 0,04914 | NA | NA |
| 1,350037985 | 0,10929 | 1,191682575 | 0,00264 | NA | NA |
| 0,892546971 | 0,51434 | 0,818469182 | 0,00767 | NA | NA |
| 0,797192477 | 0,6505  | 0,683020128 | 0,01441 | NA | NA |
| 1,096571589 | 0,31986 | 1,282536603 | 0,00431 | NA | NA |
| 0,755759964 | 0,14461 | 0,810003474 | 0,00627 | NA | NA |
| 0,865736566 | 0,49886 | 0,78132788  | 0,02451 | NA | NA |
| 0,567621051 | 0,05081 | 0,640823962 | 0,00001 | NA | NA |
| 0,95000383  | 0,61484 | 0,765248385 | 0,00103 | NA | NA |
| 0,883315051 | 0,13685 | 0,858565436 | 0,00457 | NA | NA |
| 1,188383105 | 0,08507 | 1,256142381 | 0,00545 | NA | NA |
| 0,76684133  | 0,28821 | 0,632001549 | 0,00046 | NA | NA |
| 1,476314406 | 0,07295 | 1,42800398  | 0,00577 | NA | NA |
| 1,095052471 | 0,41029 | 1,158292806 | 0,00715 | NA | NA |
| 1,074004472 | 0,66234 | 1,163926534 | 0,04466 | NA | NA |
| 1,099616149 | 0,47158 | 1,227735684 | 0,00037 | NA | NA |
| 0,863339559 | 0,14693 | 0,856188285 | 0,00967 | NA | NA |
| 1,136029265 | 0,21249 | 1,261377409 | 0,00871 | NA | NA |
| 0,834509281 | 0,14433 | 0,698339266 | 0,00082 | NA | NA |
| 0,934975198 | 0,3928  | 0,791685866 | 0,0005  | NA | NA |
| 0,711038705 | 0,1198  | 0,690158677 | 0,00037 | NA | NA |
| 0,917639882 | 0,61213 | 0,892546971 | 0,04197 | NA | NA |
| 1,064370182 | 0,88977 | 0,725476104 | 0,00107 | NA | NA |
| 0,87175824  | 0,29433 | 0,860949188 | 0,01864 | NA | NA |
| 0,765778999 | 0,20888 | 0,747942879 | 0,00008 | NA | NA |
| 0,779704843 | 0,17389 | 0,773246337 | 0,00406 | NA | NA |
| 1,537940831 | 0,11904 | 1,215036792 | 0,04734 | NA | NA |
| 1,029540083 | 0,84576 | 0,77916458  | 0,0005  | NA | NA |
| 1,381274448 | 0,31604 | 1,399585866 | 0,04735 | NA | NA |
| 0,995159722 | 0,97764 | 1,266634254 | 0,02388 | NA | NA |
| 0,924022572 | 0,68432 | 0,84323111  | 0,03202 | NA | NA |
| 0,868140228 | 0,09959 | 0,849684999 | 0,00797 | NA | NA |
| 1,092020546 | 0,52301 | 1,22858698  | 0,04178 | NA | NA |
| 1,068065408 | 0,54785 | 1,139973273 | 0,01403 | NA | NA |
| 0,721964598 | 0,11062 | 0,669891801 | 0       | NA | NA |
| 0,927873476 | 0,55571 | 0,849096246 | 0,00848 | NA | NA |
| 0,843815796 | 0,36511 | 0,862143545 | 0,02528 | NA | NA |
| 1,015366101 | 0,84132 | 1,157490217 | 0,03522 | NA | NA |
| 1,144724161 | 0,22141 | 1,115739322 | 0,0408  | NA | NA |
| 1,202469249 | 0,1661  | 1,185092771 | 0,03717 | NA | NA |
| 1,258757174 | 0,05381 | 1,132098902 | 0,00597 | NA | NA |
| 0,849096246 | 0,31213 | 0,90000193  | 0,02366 | NA | NA |
| 0,880869374 | 0,29043 | 0,878430468 | 0,03377 | NA | NA |
| 0,70270935  | 0,12067 | 0,689202576 | 0,00711 | NA | NA |
| 0,806641759 | 0,07085 | 0,795536484 | 0,00484 | NA | NA |

|             |         |             |         |    |    |
|-------------|---------|-------------|---------|----|----|
| 0,930449658 | 0,557   | 0,826450318 | 0,0007  | NA | NA |
| 0,937571096 | 0,63748 | 1,128964405 | 0,04191 | NA | NA |
| 0,801625329 | 0,10712 | 0,823591017 | 0,03245 | NA | NA |
| 0,816203046 | 0,09754 | 0,856781955 | 0,02329 | NA | NA |
| 1,035982764 | 0,73799 | 0,839149637 | 0,00764 | NA | NA |
| 0,853226098 | 0,39859 | 0,734075318 | 0,00034 | NA | NA |
| 0,750539549 | 0,18818 | 0,702222438 | 0       | NA | NA |
| 0,903752727 | 0,65266 | 0,817335328 | 0,04114 | NA | NA |
| 0,863938187 | 0,51689 | 0,77916458  | 0,04137 | NA | NA |
| 1,096571589 | 0,3786  | 1,147107024 | 0,0036  | NA | NA |
| 0,89688816  | 0,62378 | 0,77546036  | 0,00273 | NA | NA |
| 1,222640278 | 0,06021 | 1,21167266  | 0,0097  | NA | NA |
| 1,040300267 | 0,78657 | 0,81056512  | 0,01803 | NA | NA |
| 0,695923196 | 0,20155 | 0,671751713 | 0,00001 | NA | NA |
| 1,094293701 | 0,491   | 0,796088099 | 0,00426 | NA | NA |
| 0,890692901 | 0,58523 | 0,760489377 | 0,00074 | NA | NA |
| 0,925304428 | 0,48062 | 0,856188285 | 0,00783 | NA | NA |
| 0,936272247 | 0,6604  | 0,76630998  | 0,00006 | NA | NA |
| 0,982820599 | 0,90462 | 0,827023368 | 0,00307 | NA | NA |
| 0,849684999 | 0,28505 | 0,808881348 | 0,00343 | NA | NA |
| 1,122721422 | 0,30655 | 1,146312186 | 0,01158 | NA | NA |
| 1,244874235 | 0,0691  | 1,209994089 | 0,00335 | NA | NA |
| 1,098854218 | 0,49748 | 0,79774524  | 0,0165  | NA | NA |
| 0,818469182 | 0,24662 | 0,791137301 | 0,00433 | NA | NA |
| 1,267512522 | 0,0531  | 1,139973273 | 0,01051 | NA | NA |
| 0,866336856 | 0,55127 | 0,721964598 | 0,00528 | NA | NA |
| 0,839149637 | 0,46828 | 0,854409741 | 0,01103 | NA | NA |
| 1,064370182 | 0,40532 | 1,171210181 | 0,03294 | NA | NA |
| 1,175276328 | 0,57324 | 0,745872013 | 0,00355 | NA | NA |
| 1,120389214 | 0,23808 | 1,165541198 | 0,02875 | NA | NA |
| 0,998614666 | 0,99466 | 0,802737389 | 0,01635 | NA | NA |
| 0,988970916 | 0,92802 | 1,172834949 | 0,0281  | NA | NA |
| 1,116512962 | 0,23251 | 1,242288282 | 0,01994 | NA | NA |
| 0,843815796 | 0,28825 | 0,817902059 | 0,01168 | NA | NA |
| 1,085981856 | 0,46265 | 1,120389214 | 0,0042  | NA | NA |
| 0,77271055  | 0,37044 | 0,630251696 | 0       | NA | NA |
| 1,150291893 | 0,15544 | 1,229438867 | 0,002   | NA | NA |
| 1,021012126 | 0,82083 | 0,910038824 | 0,04308 | NA | NA |
| 0,86934456  | 0,08552 | 0,768970416 | 0,01538 | NA | NA |
| 1,164733586 | 0,08778 | 1,108800644 | 0,02997 | NA | NA |
| 0,773782497 | 0,17436 | 0,693515485 | 0,00038 | NA | NA |
| 0,997231251 | 0,9738  | 0,872362706 | 0,01022 | NA | NA |
| 0,905633983 | 0,48943 | 0,817902059 | 0,01195 | NA | NA |
| 0,995849753 | 0,9849  | 0,849096246 | 0,02999 | NA | NA |
| 0,667574152 | 0,07222 | 0,748461493 | 0,00053 | NA | NA |
| 0,819036698 | 0,62389 | 0,608783009 | 0,00066 | NA | NA |
| 0,922742493 | 0,28093 | 0,883927531 | 0,04818 | NA | NA |
| 0,993092495 | 0,97745 | 0,77916458  | 0,00054 | NA | NA |
| 0,748461493 | 0,10905 | 0,73153561  | 0       | NA | NA |
| 1,181811547 | 0,18558 | 1,375541818 | 0,00076 | NA | NA |
| 1,000693387 | 0,99546 | 0,86154616  | 0,00831 | NA | NA |
| 0,942131274 | 0,69975 | 0,793883931 | 0,03834 | NA | NA |
| 0,709070018 | 0,14591 | 0,814507563 | 0,02849 | NA | NA |
| 0,847332435 | 0,20526 | 0,800514811 | 0,02164 | NA | NA |
| 0,912565489 | 0,4763  | 0,845572287 | 0,01561 | NA | NA |
| 0,853226098 | 0,18984 | 0,854409741 | 0,00493 | NA | NA |
| 1,194991205 | 0,32115 | 1,208317843 | 0,01309 | NA | NA |
| 0,76418826  | 0,37677 | 0,774855931 | 0,01543 | NA | NA |
| 0,812252396 | 0,17791 | 0,753667455 | 0,00022 | NA | NA |
| 0,940174203 | 0,76894 | 0,743806881 | 0,00029 | NA | NA |
| 0,717972255 | 0,10075 | 0,655196702 | 0,00002 | NA | NA |
| 0,806641759 | 0,09334 | 0,827023368 | 0,01421 | NA | NA |
| 0,757333158 | 0,30373 | 0,60667678  | 0,0012  | NA | NA |
| 1,110338834 | 0,2577  | 1,136029265 | 0,01653 | NA | NA |
| 1,104198847 | 0,18773 | 1,101141598 | 0,04893 | NA | NA |
| 0,796640096 | 0,16124 | 0,727994774 | 0,02834 | NA | NA |
| 1,159899655 | 0,33836 | 1,424050196 | 0,00656 | NA | NA |
| 1,084477409 | 0,43075 | 1,178539408 | 0,02252 | NA | NA |
| 0,965267025 | 0,72032 | 1,151887642 | 0,00604 | NA | NA |
| 1,161508732 | 0,05546 | 1,104964485 | 0,0431  | NA | NA |
| 0,801625329 | 0,39237 | 0,720964436 | 0,0001  | NA | NA |
| 0,636397468 | 0,13801 | 0,708087719 | 0,00051 | NA | NA |
| 1,207480591 | 0,5674  | 0,747942879 | 0,0032  | NA | NA |
| 1,092020546 | 0,50399 | 1,165541198 | 0,01868 | NA | NA |
| 0,936272247 | 0,38027 | 0,807760778 | 0,00249 | NA | NA |
| 1,246601194 | 0,14053 | 1,350974085 | 0,00031 | NA | NA |
| 0,10132569  | 0,88853 | 1,179356592 | 0,01073 | NA | NA |
| 0,978063473 | 0,93357 | 0,60667678  | 0,00001 | NA | NA |
| 0,907519155 | 0,43413 | 0,759435845 | 0,00201 | NA | NA |
| 1,164733586 | 0,13543 | 1,131314463 | 0,00976 | NA | NA |
| 1,199139914 | 0,15537 | 1,197478705 | 0,03778 | NA | NA |
| 1,085981856 | 0,75496 | 0,74277646  | 0,03344 | NA | NA |
| 1,319507911 | 0,27623 | 1,236275261 | 0,0245  | NA | NA |
| 0,680657058 | 0,22612 | 0,688247801 | 0,00142 | NA | NA |
| 1,026689546 | 0,91536 | 0,745872013 | 0,002   | NA | NA |
| 1,085229372 | 0,44111 | 1,160703914 | 0,00155 | NA | NA |
| 0,812252396 | 0,08952 | 0,823591017 | 0,00312 | NA | NA |
| 1,070288698 | 0,69347 | 0,841479482 | 0,01439 | NA | NA |
| 1,174461971 | 0,27001 | 1,318593614 | 0,0016  | NA | NA |
| 0,743291492 | 0,2019  | 0,699308041 | 0,00146 | NA | NA |
| 1,235418637 | 0,05641 | 1,22010051  | 0,00808 | NA | NA |
| 1,101141598 | 0,62931 | 0,857376037 | 0,01168 | NA | NA |
| 0,86934456  | 0,16519 | 1,123499903 | 0,04396 | NA | NA |
| 0,833931044 | 0,39944 | 0,718968266 | 0,00022 | NA | NA |
| 0,86154616  | 0,14813 | 0,764718139 | 0,03818 | NA | NA |
| 1,030253954 | 0,86571 | 0,883315051 | 0,0248  | NA | NA |
| 1,088997015 | 0,28867 | 1,133669413 | 0,01521 | NA | NA |
| 0,666187413 | 0,1099  | 0,662044455 | 0,00018 | NA | NA |
| 1,254402205 | 0,09783 | 1,163926534 | 0,00756 | NA | NA |
| 1,01395948  | 0,87115 | 1,121166078 | 0,0314  | NA | NA |
| 1,140763716 | 0,25465 | 1,208317843 | 0,0012  | NA | NA |
| 0,856188285 | 0,28677 | 0,787307977 | 0,0158  | NA | NA |
| 1,163926534 | 0,1105  | 1,123499903 | 0,02782 | NA | NA |
| 1,305859787 | 0,16822 | 0,853226098 | 0,04959 | NA | NA |

|             |         |             |         |    |    |
|-------------|---------|-------------|---------|----|----|
| 1,035982764 | 0,77643 | 1,165541198 | 0,01601 | NA | NA |
| 1,030253954 | 0,76802 | 0,790589117 | 0,00093 | NA | NA |
| 0,790041312 | 0,21827 | 0,604997045 | 0,00247 | NA | NA |
| 0,842062954 | 0,14046 | 0,819604608 | 0,00248 | NA | NA |
| 0,915733686 | 0,50705 | 0,833931044 | 0,00216 | NA | NA |
| 0,881480158 | 0,16714 | 1,127400412 | 0,02875 | NA | NA |
| 1,038859103 | 0,67757 | 0,919550046 | 0,04748 | NA | NA |
| 0,816203046 | 0,37525 | 0,779704843 | 0,04866 | NA | NA |
| 1,028826708 | 0,70616 | 1,131314463 | 0,0216  | NA | NA |
| 1,07549439  | 0,25544 | 0,863938187 | 0,03259 | NA | NA |
| 1,060687741 | 0,79898 | 0,637280314 | 0,00025 | NA | NA |
| 1,068805991 | 0,43139 | 1,154285418 | 0,0272  | NA | NA |
| 1,016070143 | 0,88518 | 1,131314463 | 0,03742 | NA | NA |
| 0,77916458  | 0,41898 | 0,69399636  | 0,00042 | NA | NA |
| 0,709561678 | 0,16715 | 0,79940583  | 0,00127 | NA | NA |
| 0,923382311 | 0,52533 | 0,788400174 | 0,00056 | NA | NA |
| 1,07997656  | 0,43071 | 1,089752112 | 0,04836 | NA | NA |
| 0,76101669  | 0,09206 | 0,87175824  | 0,03066 | NA | NA |
| 0,799960128 | 0,34459 | 0,785128119 | 0,03183 | NA | NA |
| 1,21335356  | 0,19634 | 1,283425898 | 0,00055 | NA | NA |
| 1,009051634 | 0,92486 | 0,86934456  | 0,01822 | NA | NA |
| 0,922103118 | 0,40694 | 0,904379378 | 0,04055 | NA | NA |
| 1,170398641 | 0,10732 | 1,079228237 | 0,04289 | NA | NA |
| 1,073260286 | 0,51107 | 1,102669163 | 0,03618 | NA | NA |
| 0,934327347 | 0,51426 | 0,888226796 | 0,01711 | NA | NA |
| 1,018891197 | 0,80793 | 1,138394029 | 0,00207 | NA | NA |
| 1,057018041 | 0,54619 | 1,322254605 | 0,00359 | NA | NA |
| 1,093535457 | 0,28432 | 1,147902414 | 0,00376 | NA | NA |
| 1,190031696 | 0,07865 | 1,232852325 | 0,00159 | NA | NA |
| 0,791137301 | 0,20719 | 0,741747467 | 0,00105 | NA | NA |
| 1,159899655 | 0,30329 | 1,231144413 | 0,01703 | NA | NA |
| 1           | 0,99949 | 1,111879158 | 0,00948 | NA | NA |
| 0,881480158 | 0,24332 | 0,922103118 | 0,02765 | NA | NA |
| 1,207480591 | 0,06129 | 1,127400412 | 0,04508 | NA | NA |
| 0,917639882 | 0,73453 | 0,746906729 | 0,0037  | NA | NA |
| 0,939522749 | 0,53967 | 0,778085177 | 0,00967 | NA | NA |
| 1,041021598 | 0,57674 | 0,922742493 | 0,04293 | NA | NA |
| 1,060687741 | 0,50278 | 1,098092814 | 0,043   | NA | NA |
| 1,160703914 | 0,18069 | 1,186736798 | 0,01918 | NA | NA |
| 1,113421618 | 0,31861 | 1,286097483 | 0,00177 | NA | NA |
| 1,108032348 | 0,40173 | 1,113421618 | 0,03294 | NA | NA |
| 1,085981856 | 0,42349 | 1,264879542 | 0,00218 | NA | NA |
| 0,717474767 | 0,07614 | 0,796640096 | 0,03309 | NA | NA |
| 1,159095952 | 0,10819 | 1,195819797 | 0,00639 | NA | NA |
| 1,242288282 | 0,05371 | 1,196648963 | 0,00017 | NA | NA |
| 0,940174203 | 0,31978 | 0,908778116 | 0,0247  | NA | NA |
| 1,018891197 | 0,94294 | 0,753145233 | 0,00053 | NA | NA |
| 0,875998315 | 0,14287 | 0,8362464   | 0,00291 | NA | NA |
| 0,600401714 | 0,0548  | 0,76630998  | 0,00686 | NA | NA |
| 1,00556058  | 0,98112 | 0,835087919 | 0,03048 | NA | NA |
| 0,656560563 | 0,15913 | 0,721464343 | 0,01061 | NA | NA |
| 0,948684315 | 0,79213 | 0,853817714 | 0,01758 | NA | NA |
| 0,953298545 | 0,70995 | 0,857376037 | 0,03652 | NA | NA |
| 0,843815796 | 0,43907 | 0,772175133 | 0,00427 | NA | NA |
| 0,817335328 | 0,15623 | 0,771105413 | 0,00034 | NA | NA |
| 1,180992661 | 0,35429 | 1,231144413 | 0,00747 | NA | NA |
| 0,829894586 | 0,3333  | 0,746389192 | 0,0037  | NA | NA |
| 0,668500248 | 0,07014 | 0,641712949 | 0,00011 | NA | NA |
| 1,113421618 | 0,63852 | 0,642603169 | 0,00233 | NA | NA |
| 1,361314116 | 0,09264 | 1,194991205 | 0,00418 | NA | NA |
| 0,93751096  | 0,74333 | 0,726986259 | 0,00333 | NA | NA |
| 0,806641759 | 0,14702 | 0,852044095 | 0,01932 | NA | NA |
| 1,459020344 | 0,11234 | 1,294145654 | 0,02262 | NA | NA |
| 0,865136691 | 0,40071 | 0,775930854 | 0,02823 | NA | NA |
| 1,085229372 | 0,35709 | 1,255271991 | 0,00719 | NA | NA |
| 1,136029265 | 0,34113 | 1,345367209 | 0,00302 | NA | NA |
| 1,072516617 | 0,33847 | 1,108800644 | 0,00822 | NA | NA |
| 1,176906737 | 0,23058 | 1,240567298 | 0,0008  | NA | NA |
| 0,947370071 | 0,63814 | 0,853817714 | 0,00884 | NA | NA |
| 0,840896415 | 0,27834 | 0,812252396 | 0,00736 | NA | NA |
| 1,180174343 | 0,11765 | 1,192508872 | 0,04296 | NA | NA |
| 1,041743429 | 0,57853 | 1,140763716 | 0,01836 | NA | NA |
| 0,839731493 | 0,37296 | 0,76684133  | 0,00066 | NA | NA |
| 0,825305409 | 0,1735  | 0,796088099 | 0,02064 | NA | NA |
| 0,722465199 | 0,44324 | 0,635075491 | 0,00004 | NA | NA |
| 1,336074078 | 0,0832  | 1,559409685 | 0,00007 | NA | NA |
| 1,244011653 | 0,35528 | 0,905006463 | 0,01667 | NA | NA |
| 1,269270886 | 0,13922 | 1,185914499 | 0,00144 | NA | NA |
| 1,099616149 | 0,315   | 1,154285418 | 0,03352 | NA | NA |
| 1,076240125 | 0,42511 | 1,167967395 | 0,00789 | NA | NA |
| 1,098854218 | 0,39947 | 1,169587664 | 0,01224 | NA | NA |
| 0,739181216 | 0,23106 | 0,764718139 | 0,00602 | NA | NA |
| 1,025267238 | 0,76385 | 0,885767519 | 0,04319 | NA | NA |
| 1,178539408 | 0,11518 | 1,200803427 | 0,00224 | NA | NA |
| 0,860352631 | 0,08346 | 0,846158597 | 0,02034 | NA | NA |
| 1,237132479 | 0,08193 | 1,215879283 | 0,00164 | NA | NA |
| 0,96996191  | 0,77131 | 0,76418826  | 0,00811 | NA | NA |
| 0,837406488 | 0,18185 | 0,847332435 | 0,01533 | NA | NA |
| 0,860949188 | 0,45661 | 0,812252396 | 0,03283 | NA | NA |
| 0,917639882 | 0,3576  | 1,169587664 | 0,00537 | NA | NA |
| 0,918276162 | 0,317   | 0,893165852 | 0,01382 | NA | NA |
| 1,160703914 | 0,1314  | 1,157490217 | 0,00866 | NA | NA |
| 1,230291345 | 0,08673 | 1,195819797 | 0,02241 | NA | NA |
| 1,137605228 | 0,13739 | 1,169587664 | 0,01433 | NA | NA |
| 0,993781093 | 0,96309 | 0,887611337 | 0,03011 | NA | NA |
| 1,051172909 | 0,74955 | 0,874784765 | 0,0295  | NA | NA |
| 1,016774673 | 0,96038 | 0,789493887 | 0,01422 | NA | NA |
| 1,338855257 | 0,1458  | 1,258757174 | 0,00466 | NA | NA |
| 0,832198735 | 0,13152 | 0,841479482 | 0,03463 | NA | NA |
| 0,993092495 | 0,94471 | 1,188383105 | 0,00905 | NA | NA |
| 0,822450069 | 0,21929 | 0,774319028 | 0,00009 | NA | NA |
| 1,079228237 | 0,40736 | 1,155085785 | 0,00171 | NA | NA |
| 0,888842681 | 0,59277 | 0,841479482 | 0,04991 | NA | NA |
| 0,981459064 | 0,82509 | 0,828170661 | 0,00358 | NA | NA |

|             |         |             |         |    |    |
|-------------|---------|-------------|---------|----|----|
| 0,774855931 | 0,06517 | 0,708578698 | 0,00027 | NA | NA |
| 1,081474763 | 0,65846 | 0,834509281 | 0,00837 | NA | NA |
| 0,748980467 | 0,08711 | 0,745872013 | 0,00279 | NA | NA |
| 0,97063447  | 0,80302 | 0,860352631 | 0,01483 | NA | NA |
| 0,962594443 | 0,83854 | 0,856781955 | 0,04938 | NA | NA |
| 1,063632673 | 0,51905 | 1,107264584 | 0,01349 | NA | NA |
| 0,495858365 | 0,05555 | 0,400812665 | 0       | NA | NA |
| 1,01395948  | 0,90519 | 1,107264584 | 0,03546 | NA | NA |
| 0,971980988 | 0,90658 | 0,829894586 | 0,02882 | NA | NA |
| 0,76418826  | 0,11206 | 0,731028724 | 0,02662 | NA | NA |
| 1,147107024 | 0,16009 | 1,242288282 | 0,00473 | NA | NA |
| 0,757858283 | 0,1601  | 0,864537231 | 0,04449 | NA | NA |
| 0,992404375 | 0,97114 | 0,717474767 | 0,01063 | NA | NA |
| 0,890075733 | 0,3509  | 0,760489377 | 0,00015 | NA | NA |
| 1,051901779 | 0,56781 | 1,198309021 | 0,00637 | NA | NA |
| 1,185092771 | 0,38219 | 1,243149669 | 0,00686 | NA | NA |
| 0,97874165  | 0,75898 | 0,90000193  | 0,01469 | NA | NA |
| 0,740719899 | 0,19058 | 0,673150035 | 0,00011 | NA | NA |
| 1,076986376 | 0,40716 | 0,883927531 | 0,00398 | NA | NA |
| 1,219255094 | 0,05614 | 1,157490217 | 0,0496  | NA | NA |
| 0,985493337 | 0,84917 | 0,907519155 | 0,0238  | NA | NA |
| 1,181811547 | 0,05797 | 1,163926534 | 0,0065  | NA | NA |
| 1,072516617 | 0,41932 | 1,180174343 | 0,00276 | NA | NA |
| 1,071773463 | 0,61444 | 1,123499903 | 0,02182 | NA | NA |
| 0,830470024 | 0,15208 | 0,825877665 | 0,00657 | NA | NA |
| 0,87539133  | 0,56064 | 0,679243142 | 0,00006 | NA | NA |
| 0,893785162 | 0,15008 | 0,872967591 | 0,0138  | NA | NA |
| 1,092020546 | 0,2513  | 0,885767519 | 0,02885 | NA | NA |
| 0,953298545 | 0,82062 | 0,837987135 | 0,02854 | NA | NA |
| 0,758383773 | 0,13353 | 0,78132788  | 0,00022 | NA | NA |
| 1,002081605 | 0,9767  | 1,092777739 | 0,04568 | NA | NA |
| 0,908148418 | 0,32026 | 0,85027416  | 0,01359 | NA | NA |
| 0,86934456  | 0,21988 | 0,914465089 | 0,02875 | NA | NA |
| 1,017479692 | 0,88405 | 1,146312186 | 0,02096 | NA | NA |
| 0,684441907 | 0,14351 | 0,862143545 | 0,01094 | NA | NA |
| 1,008352455 | 0,91743 | 1,104198847 | 0,04883 | NA | NA |
| 0,839731493 | 0,33183 | 0,794985251 | 0,01209 | NA | NA |
| 0,924022572 | 0,67741 | 0,788400174 | 0,02236 | NA | NA |
| 0,57236208  | 0,05701 | 0,635956503 | 0,00033 | NA | NA |
| 0,776468875 | 0,06135 | 0,886381699 | 0,02146 | NA | NA |
| 1,154285418 | 0,14397 | 1,215879283 | 0,04443 | NA | NA |
| 1,047536127 | 0,73097 | 1,21167266  | 0,00407 | NA | NA |
| 1,167158102 | 0,1118  | 1,143930973 | 0,02011 | NA | NA |
| 0,90000193  | 0,28109 | 0,808320869 | 0,01292 | NA | NA |
| 0,863339559 | 0,20531 | 0,828744904 | 0,0121  | NA | NA |
| 0,840896415 | 0,50599 | 0,675955417 | 0,00164 | NA | NA |
| 1,011853201 | 0,8323  | 0,914465089 | 0,02343 | NA | NA |
| 1,167158102 | 0,21519 | 1,157490217 | 0,0258  | NA | NA |
| 1,187559666 | 0,10891 | 1,144724161 | 0,01572 | NA | NA |
| 1,078480432 | 0,5553  | 1,180174343 | 0,02122 | NA | NA |
| 1,200803427 | 0,1085  | 1,113421618 | 0,00825 | NA | NA |
| 1,149494848 | 0,05251 | 1,127400412 | 0,02045 | NA | NA |
| 0,683020128 | 0,12987 | 0,71946679  | 0,00004 | NA | NA |
| 0,804408371 | 0,26475 | 0,765778999 | 0,04357 | NA | NA |
| 1,002776436 | 0,97396 | 1,172022284 | 0,0131  | NA | NA |
| 0,771640088 | 0,05048 | 0,840896415 | 0,00488 | NA | NA |
| 1,051901779 | 0,61004 | 0,889458994 | 0,03694 | NA | NA |
| 0,835087919 | 0,1095  | 0,878430468 | 0,00756 | NA | NA |
| 1,018891197 | 0,85412 | 1,241427492 | 0,00122 | NA | NA |
| 1,21335356  | 0,06419 | 1,134455485 | 0,00551 | NA | NA |
| 0,975355462 | 0,90101 | 1,179356592 | 0,02678 | NA | NA |
| 0,955282936 | 0,61926 | 0,920187651 | 0,03336 | NA | NA |
| 0,84323111  | 0,1903  | 0,778085177 | 0,00049 | NA | NA |
| 1,190856849 | 0,10278 | 0,844986384 | 0,0312  | NA | NA |
| 0,701735863 | 0,17998 | 0,527776859 | 0       | NA | NA |
| 1,159095952 | 0,12898 | 1,178539408 | 0,00469 | NA | NA |
| 1,068805991 | 0,35135 | 1,17609125  | 0,00158 | NA | NA |
| 0,996540263 | 0,97528 | 1,136029265 | 0,01114 | NA | NA |
| 1,071773463 | 0,29937 | 1,118837101 | 0,01842 | NA | NA |
| 0,845572287 | 0,08466 | 0,81056512  | 0,00508 | NA | NA |
| 1,040300267 | 0,73097 | 1,222640278 | 0,00409 | NA | NA |
| 0,879649076 | 0,16906 | 0,87175824  | 0,00602 | NA | NA |
| 1,035982764 | 0,54196 | 1,10343374  | 0,02388 | NA | NA |
| 1,248330549 | 0,05531 | 1,170398641 | 0,02499 | NA | NA |
| 1,086734863 | 0,30671 | 1,092777739 | 0,03335 | NA | NA |
| 1,068065408 | 0,48264 | 1,104198847 | 0,04808 | NA | NA |
| 1,073260286 | 0,68363 | 0,839731493 | 0,03071 | NA | NA |
| 0,794985251 | 0,08888 | 0,777546036 | 0,00044 | NA | NA |
| 1,035982764 | 0,77226 | 0,888226796 | 0,04234 | NA | NA |
| 1,043911927 | 0,67929 | 0,901250463 | 0,02033 | NA | NA |
| 1,040300267 | 0,61698 | 1,182631    | 0,02262 | NA | NA |
| 0,905633983 | 0,31151 | 0,841479482 | 0,01531 | NA | NA |
| 0,992404375 | 0,93191 | 1,185914499 | 0,00177 | NA | NA |
| 1,20664392  | 0,6525  | 0,822450069 | 0,04136 | NA | NA |
| 1,004167543 | 0,98089 | 0,774319028 | 0,00567 | NA | NA |
| 1,059952783 | 0,411   | 1,147107024 | 0,02169 | NA | NA |
| 0,827596816 | 0,11238 | 0,883315051 | 0,01087 | NA | NA |
| 1,015366101 | 0,82803 | 1,123499903 | 0,02335 | NA | NA |
| 1,128964405 | 0,22099 | 1,108800644 | 0,02541 | NA | NA |
| 1,147902414 | 0,12053 | 1,142346247 | 0,01322 | NA | NA |
| 0,906890329 | 0,46083 | 0,833353207 | 0,02622 | NA | NA |
| 0,912565489 | 0,34545 | 1,137605228 | 0,04647 | NA | NA |
| 0,917004043 | 0,37278 | 0,776468875 | 0,02253 | NA | NA |
| 1,038139271 | 0,74793 | 1,120389214 | 0,03617 | NA | NA |
| 1,100378609 | 0,40008 | 1,111108729 | 0,04171 | NA | NA |
| 0,860949188 | 0,28169 | 0,839149637 | 0,02102 | NA | NA |
| 1,104964485 | 0,29045 | 1,101905116 | 0,04934 | NA | NA |
| 1,038139271 | 0,7674  | 1,185092771 | 0,02657 | NA | NA |
| 1,052631155 | 0,59499 | 1,073260286 | 0,04778 | NA | NA |
| 1,119612889 | 0,27803 | 1,160703914 | 0,01389 | NA | NA |
| 1,199139914 | 0,15569 | 1,159095952 | 0,04061 | NA | NA |
| 0,816768991 | 0,39266 | 0,754712984 | 0,00916 | NA | NA |
| 0,740719899 | 0,12483 | 0,786762445 | 0,00456 | NA | NA |
| 1,058484395 | 0,51845 | 1,124278924 | 0,03708 | NA | NA |

|             |         |             |         |    |    |
|-------------|---------|-------------|---------|----|----|
| 0,855595026 | 0,12008 | 1,171210181 | 0,00151 | NA | NA |
| 1,065846736 | 0,47046 | 1,093535457 | 0,04567 | NA | NA |
| 1,114966219 | 0,27868 | 1,192508872 | 0,00771 | NA | NA |
| 1,033830736 | 0,67368 | 0,901250463 | 0,0138  | NA | NA |
| 1,157490217 | 0,20315 | 1,171210181 | 0,02926 | NA | NA |
| 1,141554707 | 0,22065 | 1,20163605  | 0,00292 | NA | NA |
| 0,995159722 | 0,95124 | 1,114966219 | 0,01891 | NA | NA |
| 1,088997015 | 0,38638 | 1,185914499 | 0,00577 | NA | NA |
| 1,17772279  | 0,09849 | 1,244874235 | 0,0002  | NA | NA |
| 0,956608158 | 0,51551 | 1,138394029 | 0,01595 | NA | NA |
| 1,208317843 | 0,06233 | 1,140763716 | 0,02358 | NA | NA |
| 1,158292806 | 0,11681 | 1,186736798 | 0,02009 | NA | NA |
| 1,255271991 | 0,35708 | 0,755759964 | 0,01139 | NA | NA |
| 0,732550437 | 0,17464 | 0,618566239 | 0,00025 | NA | NA |
| 1,057018041 | 0,60826 | 1,235418637 | 0,00072 | NA | NA |
| 0,825305409 | 0,09423 | 0,862143545 | 0,03228 | NA | NA |
| 1,091263877 | 0,25902 | 1,140763716 | 0,01277 | NA | NA |
| 1,151089491 | 0,16276 | 1,190856849 | 0,00968 | NA | NA |
| 1,082975046 | 0,48619 | 1,192508872 | 0,00565 | NA | NA |
| 1,093535457 | 0,28654 | 1,134455485 | 0,04382 | NA | NA |
| 1,030968319 | 0,69776 | 1,162314108 | 0,01542 | NA | NA |
| 1,150291893 | 0,14479 | 1,361314116 | 0,00104 | NA | NA |
| 0,948026965 | 0,57577 | 1,139183377 | 0,03944 | NA | NA |
| 1,16634937  | 0,15522 | 1,296839555 | 0,00007 | NA | NA |
| 1,232852325 | 0,11423 | 1,256142381 | 0,00017 | NA | NA |
| 1,090507733 | 0,3549  | 1,148698355 | 0,02893 | NA | NA |
| 1,126619228 | 0,18368 | 1,159899655 | 0,00822 | NA | NA |
| 1,084477409 | 0,38498 | 1,111879158 | 0,04036 | NA | NA |
| 1,082975046 | 0,33764 | 1,202469249 | 0,01611 | NA | NA |
| 1,041021598 | 0,70967 | 1,123499903 | 0,03949 | NA | NA |
| 0,888226796 | 0,60966 | 0,768970416 | 0,01715 | NA | NA |
| 1,008352455 | 0,90526 | 0,90312651  | 0,01357 | NA | NA |
| 1,07997656  | 0,45713 | 1,131314463 | 0,00739 | NA | NA |
| 1,041021598 | 0,74943 | 1,135242102 | 0,01782 | NA | NA |
| 1,138394029 | 0,20725 | 1,134455485 | 0,02424 | NA | NA |
| 0,929160674 | 0,41355 | 0,899378312 | 0,02875 | NA | NA |
| 1,056285625 | 0,56489 | 1,171210181 | 0,00502 | NA | NA |
| 1,133669413 | 0,0876  | 1,172022284 | 0,00034 | NA | NA |
| 0,982820599 | 0,85479 | 1,123499903 | 0,0347  | NA | NA |
| 1,064370182 | 0,44917 | 1,132883885 | 0,02143 | NA | NA |
| 1,037419937 | 0,62995 | 1,125838586 | 0,02717 | NA | NA |
| 1,121943481 | 0,21248 | 1,221793102 | 0,0002  | NA | NA |
| 0,948026965 | 0,73758 | 0,800514811 | 0,01064 | NA | NA |
| 0,891310496 | 0,2078  | 0,802737389 | 0,01263 | NA | NA |
| 0,717474767 | 0,0639  | 0,72597914  | 0,00307 | NA | NA |
| 1,014662547 | 0,87875 | 1,136816973 | 0,03032 | NA | NA |
| 1,262252032 | 0,08845 | 1,403471726 | 0,0002  | NA | NA |
| 1,215036792 | 0,08157 | 1,123499903 | 0,03012 | NA | NA |
| 1,156688184 | 0,29525 | 1,356604327 | 0,00022 | NA | NA |
| 1,212512819 | 0,24665 | 1,465100875 | 0,00636 | NA | NA |
| 1,084477409 | 0,46648 | 1,234562607 | 0,00021 | NA | NA |
| 1,155085785 | 0,08758 | 1,165541198 | 0,02254 | NA | NA |
| 1,051901779 | 0,53629 | 1,168777249 | 0,03479 | NA | NA |
| 1,111879158 | 0,15124 | 1,163120042 | 0,019   | NA | NA |
| 1,070288698 | 0,53838 | 1,114966219 | 0,0439  | NA | NA |
| 1,012554807 | 0,85957 | 1,130530567 | 0,0262  | NA | NA |
| 1,106497353 | 0,19684 | 1,193335743 | 0,00096 | NA | NA |
| 0,980779004 | 0,7905  | 1,138394029 | 0,04027 | NA | NA |
| 1,017479692 | 0,81385 | 1,134455485 | 0,03669 | NA | NA |
| 1,080725402 | 0,54659 | 1,318593614 | 0,00008 | NA | NA |
| 1,0181852   | 0,81472 | 1,149494848 | 0,00881 | NA | NA |
| 1,059952783 | 0,57162 | 1,121166078 | 0,03476 | NA | NA |
| 1,004167543 | 0,96616 | 0,919550046 | 0,02083 | NA | NA |
| 1,128964405 | 0,14011 | 1,2397077   | 0,00162 | NA | NA |
| 0,984866443 | 0,89611 | 1,132883885 | 0,00361 | NA | NA |
| 0,932386486 | 0,28383 | 0,914465089 | 0,03108 | NA | NA |
| 1,053361036 | 0,63924 | 1,125058485 | 0,0394  | NA | NA |
| 0,89688816  | 0,38233 | 0,851453708 | 0,03068 | NA | NA |
| 1,111879158 | 0,21272 | 1,275444392 | 0,00045 | NA | NA |
| 0,941478465 | 0,77399 | 0,860352631 | 0,04386 | NA | NA |
| 1,145517898 | 0,68079 | 1,286097483 | 0,0124  | NA | NA |
| 0,711038705 | 0,08028 | 0,87175824  | 0,0492  | NA | NA |
| 1,124278924 | 0,59376 | 0,758383773 | 0,00043 | NA | NA |
| 1,087488391 | 0,16296 | 1,152686347 | 0,00475 | NA | NA |
| 1,028826708 | 0,878   | 0,787853886 | 0,00113 | NA | NA |
| 0,852044095 | 0,15247 | 0,824162085 | 0,00033 | NA | NA |
| 0,765248385 | 0,17104 | 0,723467443 | 0,00013 | NA | NA |
| 0,876605721 | 0,21579 | 0,776468875 | 0,00218 | NA | NA |
| 0,669427628 | 0,05326 | 0,721464343 | 0,01158 | NA | NA |
| 1,006257823 | 0,92566 | 0,909408252 | 0,02294 | NA | NA |
| 0,975355462 | 0,81971 | 0,833353207 | 0,02449 | NA | NA |
| 0,879649076 | 0,57582 | 0,839731493 | 0,01615 | NA | NA |
| 0,764718139 | 0,13842 | 0,804408371 | 0,00716 | NA | NA |
| 0,807760778 | 0,06753 | 0,778085177 | 0,00074 | NA | NA |
| 0,888226796 | 0,39549 | 0,797192477 | 0,00975 | NA | NA |
| 0,828170661 | 0,37117 | 0,774319028 | 0,00003 | NA | NA |
| 1,094293701 | 0,64958 | 0,734584317 | 0,00098 | NA | NA |
| 1,339783602 | 0,12647 | 1,265756594 | 0,00131 | NA | NA |
| 0,86934456  | 0,40164 | 0,697371833 | 0,02522 | NA | NA |
| 0,920187651 | 0,58955 | 0,84552287  | 0,02889 | NA | NA |
| 1,009051634 | 0,97281 | 0,725476104 | 0,0049  | NA | NA |
| 0,988970916 | 0,87037 | 0,892546971 | 0,0178  | NA | NA |
| 1,160703914 | 0,18919 | 1,180992661 | 0,02105 | NA | NA |
| 0,997231251 | 0,96611 | 0,906890329 | 0,02046 | NA | NA |
| 0,816768991 | 0,10453 | 0,788400174 | 0,00322 | NA | NA |
| 1,088997015 | 0,68613 | 0,862143545 | 0,0041  | NA | NA |
| 0,933679945 | 0,75844 | 0,853226098 | 0,01483 | NA | NA |
| 1,237132479 | 0,17375 | 1,160703914 | 0,01281 | NA | NA |
| 0,982820599 | 0,92707 | 1,311302014 | 0,01458 | NA | NA |
| 1,21167266  | 0,06684 | 1,142346247 | 0,01201 | NA | NA |
| 1,057018041 | 0,82461 | 0,823020345 | 0,0329  | NA | NA |
| 0,815637493 | 0,21426 | 0,748980467 | 0,00743 | NA | NA |
| 0,802737389 | 0,29688 | 0,768437591 | 0,00075 | NA | NA |
| 1,050444544 | 0,59796 | 1,150291893 | 0,00605 | NA | NA |

|             |         |             |         |    |    |
|-------------|---------|-------------|---------|----|----|
| 0,842062954 | 0,41186 | 0,799960128 | 0,02601 | NA | NA |
| 0,945402117 | 0,81719 | 0,808320869 | 0,03794 | NA | NA |
| 1,043911927 | 0,58046 | 1,118837101 | 0,01826 | NA | NA |
| 1,065108203 | 0,77705 | 0,775393206 | 0,00967 | NA | NA |
| 1,062895674 | 0,53922 | 0,863339559 | 0,00475 | NA | NA |
| 1,00556058  | 0,94549 | 1,200803427 | 0,00976 | NA | NA |
| 0,828744904 | 0,25338 | 0,888842681 | 0,01113 | NA | NA |
| 0,698823486 | 0,07339 | 0,801625329 | 0,00681 | NA | NA |
| 0,501040803 | 0,15236 | 0,603740296 | 0,00001 | NA | NA |
| 0,717474767 | 0,10277 | 0,808320869 | 0,00971 | NA | NA |
| 1,126619228 | 0,28516 | 1,184271612 | 0,00886 | NA | NA |
| 0,76101669  | 0,18227 | 0,713012859 | 0,00152 | NA | NA |
| 1,062895674 | 0,83541 | 0,785672517 | 0,01292 | NA | NA |
| 0,806082831 | 0,10161 | 0,718470088 | 0,00077 | NA | NA |
| 0,982820599 | 0,95256 | 0,694477568 | 0,00099 | NA | NA |
| 1,315854525 | 0,08866 | 1,195819797 | 0,01166 | NA | NA |
| 1,014662547 | 0,86847 | 0,860949188 | 0,02474 | NA | NA |
| 1,372684431 | 0,0725  | 1,10343374  | 0,03209 | NA | NA |
| 0,952637998 | 0,68768 | 0,829894586 | 0,01266 | NA | NA |
| 1,234562607 | 0,29338 | 0,891310496 | 0,03396 | NA | NA |
| 0,686818117 | 0,17699 | 0,631563631 | 0,00001 | NA | NA |
| 1,221793102 | 0,08262 | 1,137605228 | 0,03621 | NA | NA |
| 1,094293701 | 0,38785 | 1,163926534 | 0,01421 | NA | NA |
| 1,199971382 | 0,28228 | 1,203303026 | 0,00128 | NA | NA |
| 0,665725807 | 0,1169  | 0,802181166 | 0,01773 | NA | NA |
| 0,917004043 | 0,43585 | 0,858565436 | 0,0183  | NA | NA |
| 0,886381699 | 0,53846 | 0,738157203 | 0,00129 | NA | NA |
| 1,232852325 | 0,56575 | 0,735603373 | 0,00115 | NA | NA |
| 1,136029265 | 0,10222 | 1,17772279  | 0,00939 | NA | NA |
| 1,062895674 | 0,82399 | 0,608783009 | 0,00053 | NA | NA |
| 0,78132788  | 0,26754 | 0,675955417 | 0,00043 | NA | NA |
| 0,838568184 | 0,25572 | 0,866937564 | 0,04897 | NA | NA |
| 1,024556823 | 0,80352 | 1,17772279  | 0,00185 | NA | NA |
| 0,931740429 | 0,4339  | 0,867538687 | 0,00534 | NA | NA |
| 1,0132569   | 0,94294 | 0,768970416 | 0,00331 | NA | NA |
| 1,241427492 | 0,07973 | 1,111879158 | 0,01951 | NA | NA |
| 0,844400887 | 0,3493  | 0,774855931 | 0,00813 | NA | NA |
| 1,001387256 | 0,99192 | 0,78132788  | 0,00478 | NA | NA |
| 0,927230546 | 0,68837 | 0,784040454 | 0,00236 | NA | NA |
| 1,128964405 | 0,21547 | 0,866336856 | 0,04491 | NA | NA |
| 1,037419937 | 0,67836 | 1,151089491 | 0,02018 | NA | NA |
| 0,912565489 | 0,54622 | 0,816203046 | 0,00086 | NA | NA |
| 1,231998073 | 0,15706 | 1,335148303 | 0,00065 | NA | NA |
| 1,231144413 | 0,08818 | 0,914465089 | 0,04876 | NA | NA |
| 0,948684315 | 0,73119 | 0,746389192 | 0,00124 | NA | NA |
| 1,066585781 | 0,43403 | 1,130530567 | 0,03622 | NA | NA |
| 0,847919965 | 0,12243 | 0,879649076 | 0,01591 | NA | NA |
| 0,925304428 | 0,57752 | 0,752623374 | 0,00626 | NA | NA |
| 0,983502074 | 0,93891 | 0,71946679  | 0,0062  | NA | NA |
| 0,922103118 | 0,55523 | 0,802737389 | 0,00542 | NA | NA |
| 0,71548826  | 0,05601 | 0,710053679 | 0,00047 | NA | NA |
| 1,104964485 | 0,43498 | 0,882702996 | 0,001   | NA | NA |
| 0,823591017 | 0,07558 | 0,787307977 | 0,00095 | NA | NA |
| 0,85086373  | 0,08586 | 0,85797053  | 0,01036 | NA | NA |
| 0,887611337 | 0,37606 | 0,876605721 | 0,01337 | NA | NA |
| 0,821310701 | 0,58381 | 0,596254436 | 0,00117 | NA | NA |
| 1,0181852   | 0,92441 | 0,840313752 | 0,01535 | NA | NA |
| 1,472226862 | 0,10289 | 1,197478705 | 0,0425  | NA | NA |
| 1,009751298 | 0,9317  | 1,089752112 | 0,04139 | NA | NA |
| 0,879039561 | 0,40587 | 0,814507563 | 0,01052 | NA | NA |
| 0,962594443 | 0,81347 | 0,807760778 | 0,00702 | NA | NA |
| 0,875998315 | 0,30786 | 0,837406488 | 0,00529 | NA | NA |
| 0,730522189 | 0,11417 | 0,639492791 | 0,00004 | NA | NA |
| 0,961927455 | 0,8352  | 0,743806881 | 0,00004 | NA | NA |
| 1,122721422 | 0,23461 | 1,167967395 | 0,00041 | NA | NA |
| 0,778085177 | 0,34744 | 0,670821112 | 0,0004  | NA | NA |
| 1,064370182 | 0,42879 | 0,921464186 | 0,03252 | NA | NA |
| 1,108032348 | 0,30653 | 1,120389214 | 0,03619 | NA | NA |
| 1,115739322 | 0,1485  | 1,118837101 | 0,03705 | NA | NA |
| 0,730522189 | 0,199   | 0,63860688  | 0,00005 | NA | NA |
| 0,787853886 | 0,13894 | 0,800514811 | 0,00981 | NA | NA |
| 1,121943481 | 0,18188 | 1,146312186 | 0,01096 | NA | NA |
| 1,051901779 | 0,8076  | 0,797192477 | 0,01309 | NA | NA |
| 0,940174203 | 0,8466  | 0,829894586 | 0,0317  | NA | NA |
| 0,937571096 | 0,77154 | 0,701249625 | 0,00251 | NA | NA |
| 1,234562607 | 0,43247 | 0,799960128 | 0,01346 | NA | NA |
| 0,953959551 | 0,8362  | 0,668963777 | 0,00003 | NA | NA |
| 0,888842681 | 0,60434 | 0,752623374 | 0,00324 | NA | NA |
| 0,846158597 | 0,45379 | 0,743291492 | 0,00545 | NA | NA |
| 1,058484395 | 0,78555 | 0,811127156 | 0,03636 | NA | NA |
| 0,837406488 | 0,32417 | 0,771640088 | 0,00179 | NA | NA |
| 0,968618189 | 0,78308 | 0,85797053  | 0,00293 | NA | NA |
| 0,988970916 | 0,97138 | 0,526315577 | 0,00037 | NA | NA |
| 0,971307496 | 0,92788 | 0,740206649 | 0,0041  | NA | NA |
| 1,064370182 | 0,57545 | 1,22010051  | 0,0015  | NA | NA |
| 1,256142381 | 0,12664 | 1,282536603 | 0,00134 | NA | NA |
| 0,891928519 | 0,31777 | 0,837406488 | 0,00875 | NA | NA |
| 0,819604608 | 0,13303 | 0,753145233 | 0,00055 | NA | NA |
| 0,922742493 | 0,54368 | 0,842062954 | 0,00457 | NA | NA |
| 0,758909626 | 0,13324 | 0,685391402 | 0,00019 | NA | NA |
| 0,961260928 | 0,59427 | 0,905633983 | 0,01284 | NA | NA |
| 0,966606097 | 0,69345 | 0,877821798 | 0,00251 | NA | NA |
| 0,908778116 | 0,5041  | 0,866336856 | 0,01932 | NA | NA |
| 0,911933166 | 0,44646 | 0,764718139 | 0,02344 | NA | NA |
| 1,030253954 | 0,64406 | 1,078480432 | 0,0324  | NA | NA |
| 1,118837101 | 0,58787 | 0,831622098 | 0,03517 | NA | NA |
| 1,176906737 | 0,08697 | 1,193335743 | 0,00863 | NA | NA |
| 0,858565436 | 0,1351  | 0,758383773 | 0,0019  | NA | NA |
| 0,788946841 | 0,09534 | 0,768970416 | 0,00017 | NA | NA |
| 0,990342872 | 0,97735 | 0,705637922 | 0,00206 | NA | NA |
| 0,971307496 | 0,79206 | 1,102669163 | 0,01929 | NA | NA |
| 0,93109482  | 0,72494 | 0,744838732 | 0,00456 | NA | NA |
| 1,124278924 | 0,29981 | 0,905006463 | 0,03619 | NA | NA |
| 1,147902414 | 0,50427 | 0,829319546 | 0,00415 | NA | NA |

|             |         |             |         |    |    |
|-------------|---------|-------------|---------|----|----|
| 1,054822317 | 0,4698  | 0,882091365 | 0,00935 | NA | NA |
| 0,683493726 | 0,25834 | 0,559418551 | 0,00018 | NA | NA |
| 1,296839555 | 0,15847 | 1,311302014 | 0,00034 | NA | NA |
| 0,919550046 | 0,71442 | 0,828170661 | 0,02114 | NA | NA |
| 0,937571096 | 0,83722 | 0,583174685 | 0,00008 | NA | NA |
| 1,357544498 | 0,08518 | 1,269270886 | 0,00893 | NA | NA |
| 0,911933166 | 0,38239 | 0,841479482 | 0,00549 | NA | NA |
| 1,044635763 | 0,89833 | 0,693515485 | 0,00041 | NA | NA |
| 1,074749173 | 0,43185 | 1,139973273 | 0,02358 | NA | NA |
| 0,958599438 | 0,82531 | 0,716480825 | 0,00007 | NA | NA |
| 0,765778999 | 0,16122 | 0,770571108 | 0,01262 | NA | NA |
| 1,079228237 | 0,26962 | 1,088997015 | 0,04466 | NA | NA |
| 1,054091423 | 0,52336 | 1,146312186 | 0,00646 | NA | NA |
| 0,787307977 | 0,14091 | 0,73153561  | 0,00005 | NA | NA |
| 0,745872013 | 0,1712  | 0,716977624 | 0,00229 | NA | NA |
| 1,256142381 | 0,0508  | 1,278099363 | 0,00449 | NA | NA |
| 1,146312186 | 0,2002  | 1,151089491 | 0,01247 | NA | NA |
| 0,907519155 | 0,25628 | 0,832198735 | 0,00447 | NA | NA |
| 0,97874165  | 0,90789 | 0,677362489 | 0,00002 | NA | NA |
| 0,8962667   | 0,59836 | 0,847919965 | 0,01838 | NA | NA |
| 0,783497187 | 0,13228 | 0,814507563 | 0,01495 | NA | NA |
| 1,111879158 | 0,25693 | 1,17609125  | 0,01021 | NA | NA |
| 1,099616149 | 0,37871 | 1,130530567 | 0,03683 | NA | NA |
| 0,590496331 | 0,0956  | 0,516557194 | 0,0003  | NA | NA |
| 0,845572287 | 0,22579 | 0,753145233 | 0,00368 | NA | NA |
| 0,912565489 | 0,50405 | 0,744322628 | 0,0001  | NA | NA |
| 0,87417862  | 0,4046  | 0,756283999 | 0,00339 | NA | NA |
| 1,040300267 | 0,88814 | 0,69399636  | 0,00014 | NA | NA |
| 0,70270935  | 0,09808 | 0,622868708 | 0,00078 | NA | NA |
| 1,252664439 | 0,07759 | 1,133669413 | 0,04952 | NA | NA |
| 1,025978145 | 0,67256 | 0,905633983 | 0,03459 | NA | NA |
| 1,555092072 | 0,08261 | 1,195819797 | 0,02802 | NA | NA |
| 1,041021598 | 0,67134 | 1,320422841 | 0,00006 | NA | NA |
| 1,054822317 | 0,80767 | 0,839149637 | 0,0212  | NA | NA |
| 0,934975198 | 0,67988 | 0,752623374 | 0,00148 | NA | NA |
| 0,980099415 | 0,82287 | 0,886996305 | 0,0018  | NA | NA |
| 0,697855382 | 0,33911 | 0,466516496 | 0,00043 | NA | NA |
| 1,025978145 | 0,83597 | 0,8962667   | 0,02305 | NA | NA |
| 0,965267025 | 0,85311 | 0,840313752 | 0,00641 | NA | NA |
| 0,974679631 | 0,79075 | 1,139183377 | 0,02585 | NA | NA |
| 0,997231251 | 0,98076 | 0,893165852 | 0,04837 | NA | NA |
| 1,170398641 | 0,42736 | 0,866336856 | 0,03291 | NA | NA |
| 0,915099168 | 0,2701  | 0,870550563 | 0,00942 | NA | NA |
| 0,939522749 | 0,46651 | 0,825877665 | 0,00298 | NA | NA |
| 1,101905116 | 0,42227 | 1,120389214 | 0,04308 | NA | NA |
| 0,906261938 | 0,55662 | 0,793333843 | 0,0236  | NA | NA |
| 1,156688184 | 0,07983 | 1,142346247 | 0,00787 | NA | NA |
| 1,048989328 | 0,60015 | 1,160703914 | 0,00337 | NA | NA |
| 0,89688816  | 0,57711 | 0,654742712 | 0,00001 | NA | NA |
| 0,91319825  | 0,45651 | 0,885153765 | 0,03927 | NA | NA |
| 0,940174203 | 0,33901 | 1,096571589 | 0,04105 | NA | NA |
| 1,21335356  | 0,06217 | 1,161508732 | 0,00178 | NA | NA |
| 0,725476104 | 0,22044 | 0,651573575 | 0,00017 | NA | NA |
| 0,832775771 | 0,09137 | 0,787307977 | 0,00119 | NA | NA |
| 1,014662547 | 0,90623 | 0,79774524  | 0,00117 | NA | NA |
| 1,140763716 | 0,13804 | 1,274560627 | 0,0008  | NA | NA |
| 1,044635763 | 0,80956 | 0,846158597 | 0,0294  | NA | NA |
| 1,061423209 | 0,59234 | 0,831622098 | 0,00362 | NA | NA |
| 1,064370182 | 0,43459 | 1,159899655 | 0,01097 | NA | NA |
| 1,038859103 | 0,69378 | 1,113421618 | 0,04819 | NA | NA |
| 0,817335328 | 0,51643 | 0,599569957 | 0,00005 | NA | NA |
| 0,945402117 | 0,7713  | 0,840896415 | 0,01917 | NA | NA |
| 1,074749173 | 0,46498 | 1,234562607 | 0,00184 | NA | NA |
| 0,840896415 | 0,22173 | 0,804966138 | 0,01958 | NA | NA |
| 0,96996191  | 0,69982 | 1,180174343 | 0,00985 | NA | NA |
| 1,173648178 | 0,12414 | 1,107264584 | 0,02009 | NA | NA |
| 0,991029563 | 0,90163 | 0,868140228 | 0,03155 | NA | NA |
| 1,216722359 | 0,23219 | 1,204972315 | 0,03633 | NA | NA |
| 0,682073917 | 0,16407 | 0,602486157 | 0       | NA | NA |
| 0,929160674 | 0,39379 | 1,083725967 | 0,04601 | NA | NA |
| 1,082975046 | 0,56012 | 1,355664327 | 0,00058 | NA | NA |
| 1,171210181 | 0,20967 | 1,271031689 | 0,00108 | NA | NA |
| 1,132883885 | 0,2632  | 1,23370717  | 0,00277 | NA | NA |
| 0,924663278 | 0,44369 | 0,847919965 | 0,02724 | NA | NA |
| 1,17772279  | 0,07286 | 1,120389214 | 0,01499 | NA | NA |
| 0,758383773 | 0,21686 | 0,590087172 | 0,00001 | NA | NA |
| 0,986916546 | 0,95036 | 0,81056512  | 0,0023  | NA | NA |
| 1,140763716 | 0,17604 | 1,128182137 | 0,04323 | NA | NA |
| 1,120389214 | 0,26169 | 1,189207115 | 0,01754 | NA | NA |
| 1,107264584 | 0,35725 | 1,160703914 | 0,02149 | NA | NA |
| 0,824733549 | 0,28903 | 0,818469182 | 0,00432 | NA | NA |
| 0,987600861 | 0,89475 | 1,136816973 | 0,00515 | NA | NA |
| 1,011853201 | 0,92059 | 1,126619228 | 0,02262 | NA | NA |
| 1,024556823 | 0,78966 | 1,237132479 | 0,00046 | NA | NA |
| 1,301341855 | 0,05566 | 1,112650121 | 0,00831 | NA | NA |
| 0,986916546 | 0,81288 | 1,101141598 | 0,02192 | NA | NA |
| 1,2397077   | 0,38562 | 0,697371833 | 0,0218  | NA | NA |
| 0,91383145  | 0,21716 | 0,918276162 | 0,03516 | NA | NA |
| 1,057750964 | 0,67749 | 0,872362706 | 0,02258 | NA | NA |
| 0,976708529 | 0,76133 | 0,921464186 | 0,03466 | NA | NA |
| 0,662044455 | 0,10091 | 0,772175133 | 0,00837 | NA | NA |
| 1,017479692 | 0,85503 | 1,108800644 | 0,03098 | NA | NA |
| 1,400556321 | 0,15441 | 1,179356592 | 0,04143 | NA | NA |
| 1,158292806 | 0,09497 | 1,170398641 | 0,0221  | NA | NA |
| 1,120389214 | 0,42656 | 1,199139914 | 0,00312 | NA | NA |
| 1,146312186 | 0,13794 | 1,231144413 | 0,01164 | NA | NA |
| 1,018891197 | 0,77485 | 0,876605721 | 0,00488 | NA | NA |
| 0,961927455 | 0,82971 | 0,735603373 | 0,00001 | NA | NA |
| 1,054822317 | 0,77658 | 0,705637922 | 0,00243 | NA | NA |
| 1,076240125 | 0,42389 | 1,167967395 | 0,00873 | NA | NA |
| 1,035264924 | 0,74476 | 1,112650121 | 0,01629 | NA | NA |
| 1,178539408 | 0,28738 | 0,8362464   | 0,003   | NA | NA |
| 0,767905135 | 0,1387  | 0,823020345 | 0,0134  | NA | NA |
| 1,227735684 | 0,1716  | 0,844986384 | 0,008   | NA | NA |

|             |         |             |         |    |    |
|-------------|---------|-------------|---------|----|----|
| 1,196648963 | 0,06586 | 1,119612889 | 0,0291  | NA | NA |
| 0,757858283 | 0,05081 | 0,739181216 | 0,00225 | NA | NA |
| 1,055553718 | 0,45117 | 1,132883885 | 0,01106 | NA | NA |
| 0,90000193  | 0,18329 | 0,764718139 | 0,00316 | NA | NA |
| 1           | 0,99717 | 1,128964405 | 0,01978 | NA | NA |
| 1,160703914 | 0,15635 | 1,147902414 | 0,03541 | NA | NA |
| 1,178539408 | 0,08313 | 1,140763716 | 0,0386  | NA | NA |
| 1,121943481 | 0,24708 | 1,189207115 | 0,01135 | NA | NA |
| 1,096571589 | 0,26908 | 1,200803427 | 0,00656 | NA | NA |
| 1,042465761 | 0,55283 | 1,085229372 | 0,04376 | NA | NA |
| 1,246601194 | 0,05285 | 1,164733586 | 0,0243  | NA | NA |
| 1,105730653 | 0,29981 | 1,096571589 | 0,04854 | NA | NA |
| 1,085981856 | 0,35497 | 1,143930973 | 0,02866 | NA | NA |
| 0,810003474 | 0,23855 | 0,744838732 | 0,0042  | NA | NA |
| 1,128182137 | 0,60443 | 0,796640096 | 0,01585 | NA | NA |
| 1,130530567 | 0,10939 | 1,120389214 | 0,02779 | NA | NA |
| 1,155085785 | 0,26646 | 1,390881972 | 0,00003 | NA | NA |
| 1,232852325 | 0,15165 | 1,181811547 | 0,00242 | NA | NA |
| 1,179356592 | 0,05562 | 1,092020546 | 0,03781 | NA | NA |
| 1,236275261 | 0,0532  | 1,172022284 | 0,00399 | NA | NA |
| 0,78024548  | 0,24068 | 0,651122095 | 0,00015 | NA | NA |
| 1,114966219 | 0,33685 | 1,191682575 | 0,00121 | NA | NA |
| 1,132098902 | 0,43739 | 1,195819797 | 0,00739 | NA | NA |
| 1,144724161 | 0,18912 | 1,153485605 | 0,00917 | NA | NA |
| 1,164733586 | 0,061   | 1,167967395 | 0,0166  | NA | NA |
| 0,840896415 | 0,30351 | 0,655196702 | 0,0003  | NA | NA |
| 1,027401439 | 0,77629 | 1,133699413 | 0,04233 | NA | NA |
| 1,024556823 | 0,76295 | 1,152686347 | 0,01867 | NA | NA |
| 1,097331938 | 0,17415 | 1,083725967 | 0,03859 | NA | NA |
| 0,901875378 | 0,28836 | 0,816203046 | 0,00797 | NA | NA |
| 0,914465089 | 0,29896 | 0,890692901 | 0,00896 | NA | NA |
| 1,163120042 | 0,08868 | 1,182631    | 0,00053 | NA | NA |
| 1,245737416 | 0,08653 | 1,20163605  | 0,0219  | NA | NA |
| 1,07549439  | 0,3268  | 1,104198847 | 0,04185 | NA | NA |
| 1,078480432 | 0,35973 | 1,151887642 | 0,00929 | NA | NA |
| 1,115739322 | 0,34068 | 1,209155676 | 0,0028  | NA | NA |
| 0,681601304 | 0,30077 | 0,4181232   | 0,00002 | NA | NA |
| 1,059218335 | 0,56102 | 1,181811547 | 0,00697 | NA | NA |
| 1,234562607 | 0,10246 | 1,231144413 | 0,00226 | NA | NA |
| 1,065108203 | 0,69239 | 1,168777249 | 0,0299  | NA | NA |
| 1,236275261 | 0,11297 | 1,22010051  | 0,01773 | NA | NA |
| 1,111879158 | 0,45689 | 1,309485423 | 0,00068 | NA | NA |
| 0,991029563 | 0,90213 | 1,148698355 | 0,03162 | NA | NA |
| 1,157490217 | 0,19041 | 1,181811547 | 0,00997 | NA | NA |
| 0,8962667   | 0,38523 | 0,862741345 | 0,01877 | NA | NA |
| 0,794985251 | 0,17973 | 0,783497187 | 0,02839 | NA | NA |
| 1,185092771 | 0,44974 | 0,871154192 | 0,03081 | NA | NA |
| 0,870550563 | 0,58489 | 0,662044455 | 0,00085 | NA | NA |
| 0,944092419 | 0,65187 | 0,757858283 | 0,00064 | NA | NA |
| 0,867538687 | 0,19819 | 0,888842681 | 0,01205 | NA | NA |
| 1,157490217 | 0,45441 | 0,823020345 | 0,00995 | NA | NA |
| 1,272794935 | 0,07379 | 1,241427492 | 0,00026 | NA | NA |
| 0,961927455 | 0,77443 | 1,115739322 | 0,02191 | NA | NA |
| 1,156688184 | 0,27238 | 1,180174343 | 0,0052  | NA | NA |
| 1,084477409 | 0,38736 | 1,131314463 | 0,03004 | NA | NA |
| 1,043911927 | 0,58685 | 1,098854218 | 0,0326  | NA | NA |
| 0,986232704 | 0,86628 | 1,132883885 | 0,03152 | NA | NA |
| 1,152686347 | 0,26777 | 1,243149669 | 0,00385 | NA | NA |
| 1,000693387 | 0,9952  | 0,849096246 | 0,03818 | NA | NA |
| 1,029540083 | 0,76572 | 0,844400887 | 0,00763 | NA | NA |
| 1,044635763 | 0,71862 | 1,128964405 | 0,01289 | NA | NA |
| 1,131314463 | 0,15572 | 1,138394029 | 0,02715 | NA | NA |
| 1,22010051  | 0,18667 | 0,877821798 | 0,00081 | NA | NA |
| 0,77916458  | 0,0624  | 0,87417862  | 0,04225 | NA | NA |
| 1,038139271 | 0,79119 | 0,815072332 | 0,00871 | NA | NA |
| 1,207480591 | 0,12396 | 1,314031627 | 0,00032 | NA | NA |
| 0,79774524  | 0,30356 | 0,574349177 | 0,00039 | NA | NA |
| 0,97874165  | 0,88177 | 0,87175824  | 0,01176 | NA | NA |
| 1,080725402 | 0,40907 | 1,113421618 | 0,04148 | NA | NA |
| 0,926588062 | 0,46686 | 0,84323111  | 0,02359 | NA | NA |
| 1,159095952 | 0,08117 | 1,178539408 | 0,00152 | NA | NA |
| 1,076986376 | 0,53322 | 0,827596816 | 0,00081 | NA | NA |
| 0,891310496 | 0,10707 | 0,847332435 | 0,00496 | NA | NA |
| 0,756808396 | 0,06391 | 0,782411782 | 0,02363 | NA | NA |
| 0,928516852 | 0,333   | 0,887611337 | 0,00978 | NA | NA |
| 0,885153765 | 0,33073 | 0,755759964 | 0,01575 | NA | NA |
| 1,113421618 | 0,32753 | 1,264879542 | 0,00042 | NA | NA |
| 0,904379378 | 0,24664 | 0,81056512  | 0,00167 | NA | NA |
| 1           | 0,99976 | 0,77916458  | 0,00942 | NA | NA |
| 0,877821798 | 0,62564 | 0,671286251 | 0,00038 | NA | NA |
| 1,085229372 | 0,3167  | 1,137605228 | 0,00049 | NA | NA |
| 0,838568184 | 0,34108 | 0,72597914  | 0,00268 | NA | NA |
| 1,124278924 | 0,66298 | 0,738157203 | 0,01116 | NA | NA |
| 0,893785162 | 0,68636 | 0,537002236 | 0,00019 | NA | NA |
| 1,010451446 | 0,92763 | 1,138394029 | 0,01007 | NA | NA |
| 0,981459064 | 0,78205 | 0,905633983 | 0,04832 | NA | NA |
| 1,001387256 | 0,99018 | 0,875998315 | 0,03001 | NA | NA |
| 0,995159722 | 0,98405 | 0,698823486 | 0,00185 | NA | NA |
| 0,87175824  | 0,41954 | 0,77271055  | 0,00076 | NA | NA |
| 0,994470169 | 0,9314  | 1,098092814 | 0,01692 | NA | NA |
| 0,822450069 | 0,0617  | 0,820741609 | 0,0355  | NA | NA |
| 0,917639882 | 0,4483  | 0,866336856 | 0,00544 | NA | NA |
| 0,774855931 | 0,10881 | 0,843815796 | 0,0321  | NA | NA |
| 1,266634254 | 0,18065 | 1,174461971 | 0,01891 | NA | NA |
| 1,101141598 | 0,38549 | 1,167967395 | 0,00361 | NA | NA |
| 1,015366101 | 0,91075 | 0,734075318 | 0,00168 | NA | NA |
| 0,792784137 | 0,28069 | 0,70270935  | 0,00091 | NA | NA |
| 0,878430468 | 0,40407 | 0,753145233 | 0,00012 | NA | NA |
| 0,866336856 | 0,45215 | 0,679714121 | 0,00244 | NA | NA |
| 0,744322628 | 0,20871 | 0,599569957 | 0,00017 | NA | NA |
| 1,200803427 | 0,06413 | 1,251796459 | 0,00055 | NA | NA |
| 1,012554807 | 0,90252 | 0,811689581 | 0,00165 | NA | NA |
| 0,987600861 | 0,92141 | 0,877821798 | 0,00443 | NA | NA |
| 0,895025071 | 0,58149 | 0,697855382 | 0,00001 | NA | NA |



|             |         |             |         |    |    |
|-------------|---------|-------------|---------|----|----|
| 0,966606097 | 0,76904 | 0,883927531 | 0,02518 | NA | NA |
| 0,794985251 | 0,42458 | 0,575145947 | 0,00009 | NA | NA |
| 0,823591017 | 0,16568 | 0,806641759 | 0,00185 | NA | NA |
| 1,278099363 | 0,05329 | 1,214194884 | 0,01325 | NA | NA |
| 1,046810282 | 0,76324 | 1,214194884 | 0,00783 | NA | NA |
| 0,936272247 | 0,50067 | 1,176906737 | 0,03581 | NA | NA |
| 0,828170661 | 0,14476 | 0,677832163 | 0,00003 | NA | NA |
| 0,692074858 | 0,18169 | 0,687770909 | 0,00188 | NA | NA |
| 0,945402117 | 0,87981 | 0,695923196 | 0,00085 | NA | NA |
| 0,819604608 | 0,47387 | 0,739181216 | 0,00463 | NA | NA |
| 0,759435845 | 0,07762 | 0,808320869 | 0,00124 | NA | NA |
| 0,899378312 | 0,67681 | 0,857376037 | 0,03538 | NA | NA |
| 0,820741609 | 0,21341 | 0,642157904 | 0,00001 | NA | NA |
| 0,922742493 | 0,36838 | 0,805524291 | 0,00594 | NA | NA |
| 0,706127202 | 0,13274 | 0,758383773 | 0,00185 | NA | NA |
| 1,315854525 | 0,08736 | 1,179356592 | 0,03303 | NA | NA |
| 1,091263877 | 0,23185 | 1,118061851 | 0,04885 | NA | NA |
| 1,217566019 | 0,06835 | 1,178539408 | 0,00878 | NA | NA |
| 1,143930973 | 0,30814 | 1,189207115 | 0,03127 | NA | NA |
| 0,820172911 | 0,20748 | 0,66158572  | 0       | NA | NA |
| 1,039579435 | 0,68443 | 1,080725402 | 0,04251 | NA | NA |
| 1,104964485 | 0,58232 | 0,774319028 | 0,00046 | NA | NA |
| 0,831622098 | 0,40725 | 0,664342907 | 0,00665 | NA | NA |
| 0,810003474 | 0,2297  | 0,778624691 | 0,02232 | NA | NA |
| 1,118061851 | 0,3506  | 0,891310496 | 0,02261 | NA | NA |
| 1,082224645 | 0,34428 | 1,216722359 | 0,00278 | NA | NA |
| 1,101905116 | 0,22817 | 1,10343374  | 0,0427  | NA | NA |
| 1,199971382 | 0,06284 | 1,175276328 | 0,04139 | NA | NA |
| 1,025978145 | 0,86857 | 0,828170661 | 0,01083 | NA | NA |
| 1,022428531 | 0,91102 | 0,787307977 | 0,0071  | NA | NA |
| 1,062159186 | 0,81548 | 0,79940583  | 0,03397 | NA | NA |
| 1,22010051  | 0,18569 | 1,189207115 | 0,00116 | NA | NA |
| 1,012554807 | 0,90189 | 1,20163605  | 0,0462  | NA | NA |
| 1,110338834 | 0,56898 | 0,898755127 | 0,02765 | NA | NA |
| 1,095811766 | 0,25504 | 1,133669413 | 0,0178  | NA | NA |
| 0,971307496 | 0,9213  | 0,718968266 | 0,0033  | NA | NA |
| 1,097331938 | 0,40202 | 1,144724161 | 0,03878 | NA | NA |
| 1,064370182 | 0,57873 | 1,160703914 | 0,00644 | NA | NA |
| 1,141554707 | 0,0693  | 1,199139914 | 0,01081 | NA | NA |
| 1,071773463 | 0,6354  | 0,81056512  | 0,01587 | NA | NA |
| 0,982139595 | 0,91123 | 1,180174343 | 0,00148 | NA | NA |
| 1,327765158 | 0,06727 | 1,312211255 | 0,00164 | NA | NA |
| 0,819036698 | 0,09099 | 0,815637493 | 0,00816 | NA | NA |
| 0,775930854 | 0,40576 | 0,723467443 | 0,0018  | NA | NA |
| 1,192508872 | 0,10696 | 1,144724161 | 0,04064 | NA | NA |
| 0,929804943 | 0,48898 | 0,888226796 | 0,03106 | NA | NA |
| 1,048262476 | 0,65295 | 1,164733586 | 0,00756 | NA | NA |
| 0,69399636  | 0,1146  | 0,779704843 | 0,00131 | NA | NA |
| 0,890692901 | 0,52352 | 0,806641759 | 0,01722 | NA | NA |
| 1,074004472 | 0,54877 | 1,090507733 | 0,02843 | NA | NA |
| 1,054822317 | 0,53173 | 1,184271612 | 0,02341 | NA | NA |
| 1,083725967 | 0,80064 | 0,711531731 | 0,00045 | NA | NA |
| 1,168777249 | 0,24089 | 1,180174343 | 0,0194  | NA | NA |
| 1,129747215 | 0,3229  | 1,174461971 | 0,01766 | NA | NA |
| 0,823020345 | 0,22571 | 0,826450318 | 0,00076 | NA | NA |
| 0,738669032 | 0,29851 | 0,716480825 | 0,00132 | NA | NA |
| 0,919550046 | 0,58175 | 0,78024548  | 0,00625 | NA | NA |
| 0,910669834 | 0,23195 | 0,847332435 | 0,01646 | NA | NA |
| 0,942131274 | 0,44628 | 1,120389214 | 0,03657 | NA | NA |
| 1,234562607 | 0,05679 | 1,128182137 | 0,0311  | NA | NA |
| 1,112650121 | 0,62595 | 0,646624466 | 0,00002 | NA | NA |
| 0,880869374 | 0,18061 | 0,790589117 | 0,00192 | NA | NA |
| 1,008352455 | 0,93865 | 0,841479482 | 0,04133 | NA | NA |
| 0,967947027 | 0,80475 | 0,810003474 | 0,02013 | NA | NA |
| 1,036701101 | 0,83251 | 0,812252396 | 0,01582 | NA | NA |
| 1,186736798 | 0,13038 | 1,25353302  | 0,00749 | NA | NA |
| 0,988285652 | 0,86299 | 0,837406488 | 0,01978 | NA | NA |
| 0,87539133  | 0,40045 | 0,799960128 | 0,00211 | NA | NA |
| 0,917004043 | 0,63974 | 0,796640096 | 0,00037 | NA | NA |
| 0,788946841 | 0,41191 | 0,726986259 | 0,00088 | NA | NA |
| 0,869947353 | 0,21415 | 0,844400887 | 0,01909 | NA | NA |
| 0,952637998 | 0,5516  | 0,87417862  | 0,02015 | NA | NA |
| 0,829894586 | 0,0793  | 0,813379198 | 0,0322  | NA | NA |
| 0,727994774 | 0,2449  | 0,726986259 | 0,00108 | NA | NA |
| 1,099616149 | 0,38151 | 1,129747215 | 0,00742 | NA | NA |
| 1,032398535 | 0,89995 | 0,70270935  | 0,00432 | NA | NA |
| 0,972654947 | 0,74103 | 1,169587664 | 0,00199 | NA | NA |
| 1,151089491 | 0,16831 | 1,202469249 | 0,00688 | NA | NA |
| 1,011152081 | 0,90516 | 1,16634937  | 0,00775 | NA | NA |
| 0,997231251 | 0,97721 | 0,870550563 | 0,01055 | NA | NA |
| 1,111879158 | 0,28921 | 1,143930973 | 0,03398 | NA | NA |
| 1,044635763 | 0,71725 | 1,111879158 | 0,0362  | NA | NA |
| 0,966606097 | 0,88671 | 0,750539549 | 0,00047 | NA | NA |
| 1,743516479 | 0,05075 | 1,249196126 | 0,03064 | NA | NA |
| 0,798851916 | 0,27646 | 0,661127303 | 0,00016 | NA | NA |
| 0,814507563 | 0,32649 | 0,735603373 | 0,00259 | NA | NA |
| 0,736623843 | 0,1352  | 0,599569957 | 0,00024 | NA | NA |
| 1,030253954 | 0,65514 | 1,112650121 | 0,03955 | NA | NA |
| 1,090507733 | 0,40479 | 1,120389214 | 0,04676 | NA | NA |
| 0,880869374 | 0,6093  | 0,796640096 | 0,01338 | NA | NA |
| 0,887611337 | 0,20022 | 0,821310701 | 0,00961 | NA | NA |
| 1,119612889 | 0,44596 | 1,235418637 | 0,01499 | NA | NA |
| 1,374588696 | 0,07662 | 1,156688184 | 0,02031 | NA | NA |
| 1,244011653 | 0,22419 | 0,844986384 | 0,01818 | NA | NA |
| 1,124278924 | 0,61938 | 0,735093668 | 0,00088 | NA | NA |
| 1,051901779 | 0,6074  | 1,169587664 | 0,00666 | NA | NA |
| 0,993781093 | 0,95906 | 1,120389214 | 0,0343  | NA | NA |
| 0,842062954 | 0,4239  | 0,680185426 | 0,00045 | NA | NA |
| 1,048989328 | 0,68252 | 1,234562607 | 0,03644 | NA | NA |
| 1,125838586 | 0,32034 | 0,905633983 | 0,01945 | NA | NA |
| 0,974004269 | 0,83223 | 1,158292806 | 0,01428 | NA | NA |
| 0,812815602 | 0,09724 | 0,78132788  | 0,00109 | NA | NA |
| 1,0132569   | 0,89353 | 1,161508732 | 0,00486 | NA | NA |
| 1,189207115 | 0,30023 | 0,827596816 | 0,01896 | NA | NA |

|             |         |             |         |    |    |
|-------------|---------|-------------|---------|----|----|
| 0,839149637 | 0,36164 | 0,762600827 | 0,02217 | NA | NA |
| 0,780786493 | 0,2341  | 0,674551267 | 0,00006 | NA | NA |
| 1,050444544 | 0,59195 | 1,141554707 | 0,00843 | NA | NA |
| 1,361314116 | 0,14143 | 0,832198735 | 0,04064 | NA | NA |
| 1,118061851 | 0,47028 | 1,162314108 | 0,03324 | NA | NA |
| 0,778624691 | 0,27357 | 0,588045625 | 0,00003 | NA | NA |
| 0,790589117 | 0,05339 | 0,815072332 | 0,00734 | NA | NA |
| 0,90000193  | 0,62953 | 0,750539549 | 0,00116 | NA | NA |
| 1,00486382  | 0,94755 | 1,121166078 | 0,02906 | NA | NA |
| 0,959264119 | 0,82806 | 0,760489377 | 0,00545 | NA | NA |
| 0,977385766 | 0,87886 | 0,910038824 | 0,04971 | NA | NA |
| 1,033114388 | 0,77084 | 1,155886707 | 0,00845 | NA | NA |
| 1,00765376  | 0,94226 | 1,215036792 | 0,00827 | NA | NA |
| 1,070288698 | 0,43108 | 1,203303026 | 0,02635 | NA | NA |
| 1,037419937 | 0,65713 | 1,200803427 | 0,01162 | NA | NA |
| 0,86154616  | 0,5032  | 0,685391402 | 0,00129 | NA | NA |
| 1,209994089 | 0,10302 | 1,246601194 | 0,02323 | NA | NA |
| 1,242288282 | 0,0635  | 1,125838586 | 0,01825 | NA | NA |
| 1,20163605  | 0,12638 | 1,306765254 | 0,03617 | NA | NA |
| 0,874784765 | 0,60988 | 0,66158572  | 0,00135 | NA | NA |
| 1,054822317 | 0,67312 | 0,862741345 | 0,01445 | NA | NA |
| 0,971980988 | 0,71872 | 0,823020345 | 0,00042 | NA | NA |
| 1,011853201 | 0,93242 | 0,853226098 | 0,00143 | NA | NA |
| 1,172834949 | 0,3292  | 1,387992719 | 0,00125 | NA | NA |
| 1,118061851 | 0,51818 | 0,775393206 | 0,02429 | NA | NA |
| 0,958599438 | 0,75475 | 0,817335328 | 0,0302  | NA | NA |
| 0,899378312 | 0,29233 | 0,819604608 | 0,01731 | NA | NA |
| 1,058484395 | 0,62121 | 0,88696305  | 0,03934 | NA | NA |
| 1,191682575 | 0,07506 | 1,232852325 | 0,02029 | NA | NA |
| 0,957271458 | 0,90822 | 0,71946679  | 0,00051 | NA | NA |
| 0,933032992 | 0,76015 | 0,630251696 | 0,00107 | NA | NA |
| 1,07997656  | 0,36372 | 1,244011653 | 0,00024 | NA | NA |
| 0,981459064 | 0,86488 | 0,893165852 | 0,0496  | NA | NA |
| 1,093535457 | 0,3614  | 1,257884972 | 0,00014 | NA | NA |
| 1,083725967 | 0,41306 | 1,082224645 | 0,04964 | NA | NA |
| 1,062159186 | 0,55944 | 1,216722359 | 0,0074  | NA | NA |
| 0,844400887 | 0,39909 | 0,815637493 | 0,04929 | NA | NA |
| 0,740206649 | 0,16546 | 0,582770599 | 0,00001 | NA | NA |
| 0,929160674 | 0,84774 | 0,687770909 | 0,01602 | NA | NA |
| 1,054091423 | 0,50325 | 1,105730653 | 0,04827 | NA | NA |
| 1,107264584 | 0,79598 | 0,505225723 | 0,00018 | NA | NA |
| 1,162314108 | 0,29583 | 1,128964405 | 0,02199 | NA | NA |
| 0,959264119 | 0,67708 | 0,892546971 | 0,02768 | NA | NA |
| 0,833353207 | 0,33881 | 0,556710809 | 0,01307 | NA | NA |
| 0,91319825  | 0,30936 | 0,931740429 | 0,04733 | NA | NA |
| 0,925304428 | 0,34462 | 0,864537231 | 0,00912 | NA | NA |
| 1,072516617 | 0,47932 | 1,121166078 | 0,03566 | NA | NA |
| 0,583174685 | 0,21375 | 0,739693755 | 0,00051 | NA | NA |
| 0,903752727 | 0,18935 | 0,844986384 | 0,00266 | NA | NA |
| 0,783497187 | 0,16712 | 0,639936207 | 0,00001 | NA | NA |
| 1,053361036 | 0,56369 | 1,147107024 | 0,03906 | NA | NA |
| 0,813943185 | 0,37524 | 0,736623843 | 0,03137 | NA | NA |
| 0,915733686 | 0,79713 | 0,831622098 | 0,02509 | NA | NA |
| 0,67877249  | 0,06398 | 0,799960128 | 0,03382 | NA | NA |
| 0,885767519 | 0,27081 | 0,886381699 | 0,03081 | NA | NA |
| 1,011853201 | 0,86319 | 1,165541198 | 0,00705 | NA | NA |
| 1,051901779 | 0,62794 | 1,131314463 | 0,03602 | NA | NA |
| 0,71449707  | 0,30647 | 0,727994774 | 0,00043 | NA | NA |
| 0,79774524  | 0,08193 | 0,884540435 | 0,01155 | NA | NA |
| 1,011152081 | 0,89289 | 1,125838586 | 0,03242 | NA | NA |
| 0,979420298 | 0,85717 | 1,111879158 | 0,03398 | NA | NA |
| 1,095052471 | 0,35634 | 1,130530567 | 0,04695 | NA | NA |
| 0,952637998 | 0,56726 | 1,118061851 | 0,03785 | NA | NA |
| 0,711038705 | 0,13048 | 0,745355193 | 0,0074  | NA | NA |
| 1,132098902 | 0,12394 | 1,153485605 | 0,00939 | NA | NA |
| 1,182631    | 0,08258 | 1,123499903 | 0,0169  | NA | NA |
| 0,955945318 | 0,61312 | 1,132098902 | 0,03206 | NA | NA |
| 1,016070143 | 0,81434 | 1,163926534 | 0,00107 | NA | NA |
| 1,002081605 | 0,97433 | 0,884540435 | 0,00956 | NA | NA |
| 0,915733686 | 0,60264 | 0,747942879 | 0,00397 | NA | NA |
| 1,07549439  | 0,39494 | 1,118837101 | 0,0336  | NA | NA |
| 1,069547088 | 0,53269 | 1,136816973 | 0,00658 | NA | NA |
| 0,88696305  | 0,13811 | 0,875998315 | 0,04828 | NA | NA |
| 1,047536127 | 0,58436 | 1,137605228 | 0,00924 | NA | NA |
| 1,074004472 | 0,50579 | 0,87539133  | 0,04273 | NA | NA |
| 1,224336392 | 0,05384 | 1,110338834 | 0,01977 | NA | NA |
| 1,152686347 | 0,09442 | 1,317679952 | 0,00005 | NA | NA |
| 1,180174343 | 0,10135 | 1,185914499 | 0,02039 | NA | NA |
| 1,060687741 | 0,48234 | 1,151089491 | 0,00562 | NA | NA |
| 0,906261938 | 0,47888 | 0,759435845 | 0,00436 | NA | NA |
| 0,633756261 | 0,1402  | 0,504525817 | 0,00002 | NA | NA |
| 0,967947027 | 0,7912  | 1,172022284 | 0,01386 | NA | NA |
| 0,904379378 | 0,24516 | 0,849684999 | 0,02581 | NA | NA |
| 0,841479482 | 0,30875 | 0,755236293 | 0,02507 | NA | NA |
| 1,039579435 | 0,57659 | 1,091263877 | 0,02605 | NA | NA |
| 1,101905116 | 0,28027 | 0,820741609 | 0,00658 | NA | NA |
| 1,174461971 | 0,06154 | 1,155085785 | 0,04417 | NA | NA |
| 0,925946023 | 0,55104 | 1,172834949 | 0,0001  | NA | NA |
| 0,912565489 | 0,56848 | 0,727994774 | 0,00018 | NA | NA |
| 0,995159722 | 0,94239 | 1,119612889 | 0,03064 | NA | NA |
| 1,046810282 | 0,71994 | 0,78024548  | 0,00058 | NA | NA |
| 1,073260286 | 0,44314 | 1,155085785 | 0,01334 | NA | NA |
| 0,745355193 | 0,0887  | 0,667111585 | 0,00004 | NA | NA |
| 0,863339559 | 0,22819 | 0,773782497 | 0,02596 | NA | NA |
| 1,157490217 | 0,15574 | 1,146312186 | 0,01014 | NA | NA |
| 0,954621014 | 0,52799 | 1,263127262 | 0,00103 | NA | NA |
| 0,984866443 | 0,92523 | 0,730522189 | 0,00008 | NA | NA |
| 1,0181852   | 0,94166 | 0,746906729 | 0,00091 | NA | NA |
| 1,053361036 | 0,42997 | 1,106497353 | 0,01544 | NA | NA |
| 1,156688184 | 0,16147 | 1,181811547 | 0,00162 | NA | NA |
| 0,734584317 | 0,07735 | 0,595428425 | 0       | NA | NA |
| 1,021720083 | 0,84201 | 0,866336856 | 0,00285 | NA | NA |
| 0,990342872 | 0,88326 | 0,798851916 | 0,00039 | NA | NA |
| 1,025267238 | 0,91018 | 0,784040454 | 0,00299 | NA | NA |

|             |         |             |         |    |    |
|-------------|---------|-------------|---------|----|----|
| 1,096571589 | 0,31365 | 1,176906737 | 0,00129 | NA | NA |
| 1,058484395 | 0,5547  | 1,130530567 | 0,0113  | NA | NA |
| 1,016070143 | 0,93638 | 0,762600827 | 0,00312 | NA | NA |
| 1,124278924 | 0,16374 | 1,180992661 | 0,0059  | NA | NA |
| 0,983502074 | 0,8052  | 1,128182137 | 0,02947 | NA | NA |
| 1,20163605  | 0,0704  | 1,161508732 | 0,01159 | NA | NA |
| 0,96727633  | 0,71541 | 1,139973273 | 0,0142  | NA | NA |
| 1,054822317 | 0,43422 | 1,128182137 | 0,02498 | NA | NA |
| 1,269270886 | 0,08016 | 1,261377409 | 0,00021 | NA | NA |
| 0,727994774 | 0,21759 | 0,573156093 | 0,00001 | NA | NA |
| 1,041021598 | 0,6415  | 1,104198847 | 0,03481 | NA | NA |
| 0,767373048 | 0,16449 | 0,765778999 | 0,00094 | NA | NA |
| 1,049716684 | 0,67648 | 1,121943481 | 0,04072 | NA | NA |
| 0,796640096 | 0,16442 | 0,762072415 | 0,0055  | NA | NA |
| 1,092777739 | 0,30592 | 0,924663278 | 0,02796 | NA | NA |
| 0,93109482  | 0,4476  | 0,908148418 | 0,03585 | NA | NA |
| 0,969289817 | 0,64903 | 0,800514811 | 0,00001 | NA | NA |
| 0,682073917 | 0,09878 | 0,555169417 | 0,00009 | NA | NA |
| 0,786762445 | 0,11959 | 0,639049682 | 0,0007  | NA | NA |
| 0,969289817 | 0,74376 | 1,114966219 | 0,03878 | NA | NA |
| 0,897510051 | 0,32822 | 0,8962667   | 0,02882 | NA | NA |
| 0,877213549 | 0,55156 | 0,712025098 | 0,01253 | NA | NA |
| 0,962594443 | 0,67612 | 0,84323111  | 0,00661 | NA | NA |
| 1,231998073 | 0,0884  | 1,242288282 | 0,00168 | NA | NA |
| 1,096571589 | 0,37667 | 1,192508872 | 0,009   | NA | NA |
| 0,947370071 | 0,83971 | 0,771640088 | 0,01174 | NA | NA |
| 0,993781093 | 0,98282 | 0,757333158 | 0,02016 | NA | NA |
| 0,846158597 | 0,33802 | 0,830470024 | 0,01351 | NA | NA |
| 0,724471077 | 0,13762 | 0,695923196 | 0,0002  | NA | NA |
| 1,115739322 | 0,57056 | 0,803850991 | 0,00058 | NA | NA |
| 1,051901779 | 0,49696 | 1,121166078 | 0,03929 | NA | NA |
| 0,919550046 | 0,6608  | 0,812252396 | 0,00067 | NA | NA |
| 1,047536127 | 0,57036 | 1,104964485 | 0,04375 | NA | NA |
| 0,933032992 | 0,38004 | 0,890692901 | 0,01681 | NA | NA |
| 1,015366101 | 0,85942 | 1,099616149 | 0,04281 | NA | NA |
| 1,196648963 | 0,06436 | 1,159095952 | 0,02757 | NA | NA |
| 0,858565436 | 0,62763 | 0,71548826  | 0,00687 | NA | NA |
| 1,072516617 | 0,34692 | 1,196648963 | 0,0075  | NA | NA |
| 0,882091365 | 0,11014 | 0,854409741 | 0,00322 | NA | NA |
| 0,632001549 | 0,05422 | 0,517273791 | 0       | NA | NA |
| 0,999307093 | 0,99094 | 1,095811766 | 0,03501 | NA | NA |
| 1,422077411 | 0,27658 | 1,565908593 | 0,04295 | NA | NA |
| 1,25353302  | 0,0594  | 1,115739322 | 0,02407 | NA | NA |
| 0,905006463 | 0,55415 | 0,804966138 | 0,01149 | NA | NA |
| 1,066585781 | 0,47145 | 1,087488391 | 0,03372 | NA | NA |
| 1,050444544 | 0,5401  | 1,101141598 | 0,0488  | NA | NA |
| 1,0132569   | 0,89318 | 0,898132373 | 0,00959 | NA | NA |
| 0,93751096  | 0,35038 | 0,920187651 | 0,04505 | NA | NA |
| 0,627635996 | 0,09539 | 0,457232545 | 0       | NA | NA |
| 0,518350551 | 0,06419 | 0,471719125 | 0,0001  | NA | NA |
| 1,131314463 | 0,38724 | 1,183451022 | 0,01857 | NA | NA |
| 1,063632673 | 0,35137 | 1,141554707 | 0,00936 | NA | NA |
| 1,0453601   | 0,56078 | 1,120389214 | 0,03741 | NA | NA |
| 1,091263877 | 0,28457 | 1,257013375 | 0,00084 | NA | NA |
| 0,859160755 | 0,21107 | 0,853817714 | 0,00082 | NA | NA |
| 0,863938187 | 0,2419  | 0,804966138 | 0,0112  | NA | NA |
| 1,116512962 | 0,21053 | 1,246601194 | 0,00186 | NA | NA |
| 1,040300267 | 0,57905 | 1,110338834 | 0,04944 | NA | NA |
| 0,883315051 | 0,40874 | 0,846158597 | 0,02376 | NA | NA |
| 1,147902414 | 0,20402 | 1,252664439 | 0,00044 | NA | NA |
| 1,092777739 | 0,35492 | 1,209994089 | 0,00562 | NA | NA |
| 1,115739322 | 0,31781 | 1,136816973 | 0,00246 | NA | NA |
| 1,125838586 | 0,22902 | 1,32317144  | 0,00007 | NA | NA |
| 1,008352455 | 0,93605 | 1,190031696 | 0,00148 | NA | NA |
| 0,958599438 | 0,67431 | 1,112650121 | 0,03485 | NA | NA |
| 0,876605721 | 0,10655 | 0,877821798 | 0,01915 | NA | NA |
| 1,043911927 | 0,7592  | 0,859160755 | 0,01695 | NA | NA |
| 1,04608494  | 0,56038 | 1,159095952 | 0,01472 | NA | NA |
| 1,07997656  | 0,66275 | 0,744838732 | 0       | NA | NA |
| 1,136029265 | 0,05088 | 1,200803427 | 0,00695 | NA | NA |
| 1,009751298 | 0,96923 | 0,77271055  | 0,0095  | NA | NA |
| 1,073260286 | 0,42027 | 1,168777249 | 0,01843 | NA | NA |
| 1,133669413 | 0,18019 | 1,185092771 | 0,0028  | NA | NA |
| 1,183451022 | 0,06075 | 1,138394029 | 0,02237 | NA | NA |
| 0,897510051 | 0,20582 | 1,129747215 | 0,02107 | NA | NA |
| 1,178539408 | 0,09466 | 1,154285418 | 0,02429 | NA | NA |
| 1,057750964 | 0,40871 | 1,135242102 | 0,01907 | NA | NA |
| 1,088997015 | 0,58383 | 0,828744904 | 0,00691 | NA | NA |
| 0,862741345 | 0,16237 | 0,836826243 | 0,0095  | NA | NA |
| 0,960594864 | 0,68556 | 0,786762445 | 0,0073  | NA | NA |
| 0,936272247 | 0,36303 | 0,901875378 | 0,04041 | NA | NA |
| 1,111879158 | 0,26906 | 1,156688184 | 0,01416 | NA | NA |
| 1,041743429 | 0,67183 | 0,898132373 | 0,01016 | NA | NA |
| 0,84323111  | 0,36303 | 0,786762445 | 0,00002 | NA | NA |
| 0,784040454 | 0,23103 | 0,773246337 | 0,02616 | NA | NA |
| 1,068065408 | 0,7376  | 0,862741345 | 0,04144 | NA | NA |
| 1,051901779 | 0,83101 | 0,785672517 | 0,00462 | NA | NA |
| 0,647072827 | 0,18914 | 0,6341957   | 0,00163 | NA | NA |
| 1,118837101 | 0,21661 | 0,899378312 | 0,03199 | NA | NA |
| 1,044635763 | 0,62145 | 0,890075733 | 0,04728 | NA | NA |
| 0,880259014 | 0,51833 | 0,752101876 | 0,00884 | NA | NA |
| 0,767373048 | 0,15465 | 0,862143545 | 0,03156 | NA | NA |
| 1,136816973 | 0,10038 | 1,169587664 | 0,01418 | NA | NA |
| 1,016774673 | 0,884   | 1,101905116 | 0,02516 | NA | NA |
| 1,245737416 | 0,2633  | 1,113421618 | 0,01078 | NA | NA |
| 0,922103118 | 0,6757  | 0,835087919 | 0,00608 | NA | NA |
| 0,976708529 | 0,86266 | 0,757858283 | 0,00057 | NA | NA |
| 1,02313747  | 0,82239 | 1,098854218 | 0,03849 | NA | NA |
| 1,07997656  | 0,42268 | 1,171210181 | 0,02061 | NA | NA |
| 1,096571589 | 0,23577 | 1,108800644 | 0,02869 | NA | NA |
| 0,756808396 | 0,08106 | 0,701249625 | 0,00015 | NA | NA |
| 1,00556058  | 0,95885 | 0,8962667   | 0,04045 | NA | NA |
| 0,883315051 | 0,34742 | 0,89688816  | 0,04065 | NA | NA |
| 1,073260286 | 0,75441 | 0,841479482 | 0,04508 | NA | NA |

|             |         |             |         |    |    |
|-------------|---------|-------------|---------|----|----|
| 0,920187651 | 0,64515 | 0,759435845 | 0,01099 | NA | NA |
| 0,770571108 | 0,12418 | 0,647072827 | 0,00172 | NA | NA |
| 0,976031761 | 0,93438 | 0,807760778 | 0,02865 | NA | NA |
| 0,580351957 | 0,0702  | 0,623300597 | 0,0003  | NA | NA |
| 1,039579435 | 0,68577 | 1,171210181 | 0,01522 | NA | NA |
| 1,132883885 | 0,13869 | 1,159899655 | 0,01272 | NA | NA |
| 0,892546971 | 0,10906 | 0,825877665 | 0,00226 | NA | NA |
| 1,053361036 | 0,53078 | 0,901875378 | 0,02484 | NA | NA |
| 1,016070143 | 0,8828  | 0,90312651  | 0,01749 | NA | NA |
| 0,918912883 | 0,5364  | 1,209155676 | 0,02    | NA | NA |
| 1,019597683 | 0,81071 | 0,924022572 | 0,01585 | NA | NA |
| 1,129747215 | 0,19381 | 1,164733586 | 0,0019  | NA | NA |
| 1,115739322 | 0,33166 | 1,168777249 | 0,00369 | NA | NA |
| 1,059952783 | 0,60296 | 1,195819797 | 0,01856 | NA | NA |
| 1,071773463 | 0,38571 | 1,129747215 | 0,01168 | NA | NA |
| 0,957271458 | 0,67217 | 0,870550563 | 0,04828 | NA | NA |
| 1,200803427 | 0,05423 | 1,114193651 | 0,04634 | NA | NA |
| 0,940826108 | 0,59921 | 0,821880187 | 0,00061 | NA | NA |
| 0,866937564 | 0,20516 | 0,719965659 | 0       | NA | NA |
| 0,87539133  | 0,52894 | 0,650670928 | 0,00001 | NA | NA |
| 1,164733586 | 0,13561 | 1,121166078 | 0,04197 | NA | NA |
| 0,832775771 | 0,41301 | 0,683493726 | 0,00021 | NA | NA |
| 0,936272247 | 0,45236 | 1,157490217 | 0,00615 | NA | NA |
| 0,788946841 | 0,34012 | 0,765248385 | 0,01111 | NA | NA |
| 1,257884972 | 0,05226 | 1,32408891  | 0,00219 | NA | NA |
| 1,034547582 | 0,82685 | 0,740719899 | 0,0019  | NA | NA |
| 1,140763716 | 0,10226 | 1,132883885 | 0,00977 | NA | NA |
| 0,81056512  | 0,37302 | 0,574349177 | 0,00002 | NA | NA |
| 0,745355193 | 0,24043 | 0,720464874 | 0,02854 | NA | NA |
| 0,881480158 | 0,35525 | 0,728499557 | 0,0003  | NA | NA |
| 1,090507733 | 0,82988 | 0,786762445 | 0,00477 | NA | NA |
| 0,801069878 | 0,07301 | 0,856188285 | 0,00693 | NA | NA |
| 0,988970916 | 0,90003 | 0,897510051 | 0,03927 | NA | NA |
| 1,070288698 | 0,7514  | 0,855002178 | 0,02835 | NA | NA |
| 1,098092814 | 0,28276 | 1,252664439 | 0,00569 | NA | NA |
| 1,190031696 | 0,49564 | 0,838568184 | 0,03256 | NA | NA |
| 0,7944344   | 0,09422 | 0,773782497 | 0,00398 | NA | NA |
| 0,76101669  | 0,1218  | 0,846745312 | 0,01443 | NA | NA |
| 0,924022572 | 0,30262 | 0,906261938 | 0,03592 | NA | NA |
| 0,837987135 | 0,5019  | 0,700763725 | 0,00292 | NA | NA |
| 1,038859103 | 0,65908 | 0,898132373 | 0,02635 | NA | NA |
| 1,458009379 | 0,12185 | 1,229438867 | 0,03739 | NA | NA |
| 0,916368645 | 0,64269 | 0,749499801 | 0,00612 | NA | NA |
| 1,192508872 | 0,24391 | 1,242288282 | 0,00106 | NA | NA |
| 0,996540263 | 0,97347 | 1,192508872 | 0,02201 | NA | NA |
| 1,114966219 | 0,30317 | 1,190856849 | 0,00517 | NA | NA |
| 0,828744904 | 0,12699 | 0,838568184 | 0,02727 | NA | NA |
| 1,000693387 | 0,99344 | 0,911933166 | 0,04126 | NA | NA |
| 1,341642225 | 0,10823 | 1,16634937  | 0,02669 | NA | NA |
| 0,734075318 | 0,10893 | 0,782411782 | 0,00388 | NA | NA |
| 1,043911927 | 0,58841 | 1,147902414 | 0,03247 | NA | NA |
| 1,071773463 | 0,67109 | 0,817902059 | 0,00312 | NA | NA |
| 0,777007269 | 0,27836 | 0,731028724 | 0,01488 | NA | NA |
| 1,216722359 | 0,12772 | 1,129747215 | 0,02855 | NA | NA |
| 0,773782497 | 0,07384 | 0,726482525 | 0,00221 | NA | NA |
| 1,070288698 | 0,65689 | 0,868140228 | 0,04686 | NA | NA |
| 0,678302164 | 0,0753  | 0,624598063 | 0,00036 | NA | NA |
| 1,101141598 | 0,35234 | 0,836826243 | 0,0151  | NA | NA |
| 0,917639882 | 0,25628 | 0,785672517 | 0,0061  | NA | NA |
| 1,062159186 | 0,66676 | 0,785672517 | 0,02018 | NA | NA |
| 1,110338834 | 0,27188 | 1,20163605  | 0,00683 | NA | NA |
| 1,087488391 | 0,48809 | 0,851453708 | 0,0223  | NA | NA |
| 0,828744904 | 0,21875 | 0,767373048 | 0,00086 | NA | NA |
| 0,974004269 | 0,79861 | 1,172834949 | 0,02499 | NA | NA |
| 1,040300267 | 0,59662 | 0,870550563 | 0,01102 | NA | NA |
| 1,101905116 | 0,81744 | 0,808320869 | 0,02972 | NA | NA |
| 1,067325338 | 0,71068 | 0,770571108 | 0,00027 | NA | NA |
| 0,877213549 | 0,67676 | 0,571173123 | 0,00059 | NA | NA |
| 1,085229372 | 0,41214 | 1,123499903 | 0,03947 | NA | NA |
| 0,841479482 | 0,39665 | 0,832775771 | 0,02862 | NA | NA |
| 0,937571096 | 0,6244  | 0,780786493 | 0,00506 | NA | NA |
| 0,983502074 | 0,95866 | 0,783497187 | 0,00494 | NA | NA |
| 1,057018041 | 0,37227 | 1,097331938 | 0,03801 | NA | NA |
| 0,622437118 | 0,08614 | 0,790041312 | 0,03556 | NA | NA |
| 0,910038824 | 0,62189 | 0,849096246 | 0,00988 | NA | NA |
| 0,804408371 | 0,1849  | 0,825877665 | 0,00712 | NA | NA |
| 0,825305409 | 0,49295 | 0,794985251 | 0,0444  | NA | NA |
| 0,859756486 | 0,26473 | 0,741747467 | 0,00023 | NA | NA |
| 0,811127156 | 0,05219 | 0,865736566 | 0,00705 | NA | NA |
| 0,852044095 | 0,32392 | 0,796640096 | 0,01897 | NA | NA |
| 0,889458994 | 0,42831 | 1,316766922 | 0,00119 | NA | NA |
| 0,91383145  | 0,45543 | 0,825877665 | 0,00035 | NA | NA |
| 1,100378609 | 0,73816 | 0,837406488 | 0,03582 | NA | NA |
| 1,285206337 | 0,07597 | 1,17609125  | 0,01795 | NA | NA |
| 0,828170661 | 0,37582 | 0,785128119 | 0,00924 | NA | NA |
| 0,984866443 | 0,86197 | 1,101141598 | 0,01354 | NA | NA |
| 1,091263877 | 0,67849 | 0,813379198 | 0,00506 | NA | NA |
| 0,924663278 | 0,57453 | 0,771640088 | 0,00096 | NA | NA |
| 0,87175824  | 0,33681 | 0,819036698 | 0,00383 | NA | NA |
| 1,146312186 | 0,202   | 1,163926534 | 0,02938 | NA | NA |
| 0,873572896 | 0,63096 | 0,709070018 | 0,00046 | NA | NA |
| 1,059952783 | 0,4804  | 1,118837101 | 0,03697 | NA | NA |
| 0,76418826  | 0,14715 | 0,679714121 | 0,00381 | NA | NA |
| 0,747424624 | 0,25571 | 0,631126016 | 0       | NA | NA |
| 1,078480432 | 0,48315 | 0,79774524  | 0,01042 | NA | NA |
| 0,955945318 | 0,83375 | 0,839731493 | 0,00923 | NA | NA |
| 0,844986384 | 0,21578 | 0,817335328 | 0,02504 | NA | NA |
| 0,751580739 | 0,05876 | 0,755236293 | 0,00401 | NA | NA |
| 0,841479482 | 0,17587 | 0,771640088 | 0,01344 | NA | NA |
| 1,027401439 | 0,93665 | 0,71548826  | 0,00683 | NA | NA |
| 0,984866443 | 0,94958 | 0,821880187 | 0,04902 | NA | NA |
| 0,933679945 | 0,6901  | 0,813943185 | 0,02    | NA | NA |
| 1,110338834 | 0,29092 | 1,127400412 | 0,04256 | NA | NA |
| 0,743806881 | 0,15046 | 0,845572287 | 0,03461 | NA | NA |

|             |         |             |         |    |    |
|-------------|---------|-------------|---------|----|----|
| 0,793333843 | 0,07842 | 0,86934456  | 0,02466 | NA | NA |
| 0,943438251 | 0,63403 | 0,882702996 | 0,02405 | NA | NA |
| 0,753145233 | 0,24508 | 0,748980467 | 0,00043 | NA | NA |
| 0,918912883 | 0,49682 | 0,816768891 | 0,01219 | NA | NA |
| 1,042465761 | 0,86522 | 0,673616788 | 0,0113  | NA | NA |
| 0,801069878 | 0,15655 | 0,860352631 | 0,02914 | NA | NA |
| 1,048989328 | 0,46226 | 1,123499903 | 0,03784 | NA | NA |
| 1,190031696 | 0,08261 | 1,138394029 | 0,01098 | NA | NA |
| 0,716480825 | 0,34752 | 0,56097174  | 0,00002 | NA | NA |
| 0,852044095 | 0,34017 | 0,7944344   | 0,00226 | NA | NA |
| 0,737645729 | 0,07251 | 0,645281245 | 0       | NA | NA |
| 1,175276328 | 0,10719 | 1,156688184 | 0,04364 | NA | NA |
| 1,170398641 | 0,10064 | 1,20163605  | 0,00076 | NA | NA |
| 1,184271612 | 0,05541 | 1,136029265 | 0,01933 | NA | NA |
| 0,957271458 | 0,7889  | 0,826450318 | 0,03802 | NA | NA |
| 0,812252396 | 0,16951 | 0,827023368 | 0,02517 | NA | NA |
| 0,770037174 | 0,40052 | 0,627635996 | 0,00079 | NA | NA |
| 1,489677463 | 0,06328 | 1,20163605  | 0,00663 | NA | NA |
| 1,114966219 | 0,50553 | 0,76154437  | 0,00381 | NA | NA |
| 1,069547088 | 0,73816 | 0,768970416 | 0,01309 | NA | NA |
| 0,957935218 | 0,55832 | 0,837987135 | 0,00317 | NA | NA |
| 0,926588062 | 0,49859 | 0,680657058 | 0,00067 | NA | NA |
| 0,943438251 | 0,61288 | 0,888226796 | 0,00781 | NA | NA |
| 0,78132788  | 0,25763 | 0,565657231 | 0,0001  | NA | NA |
| 0,979420298 | 0,93432 | 0,650220073 | 0,00067 | NA | NA |
| 1,016774673 | 0,86416 | 1,126619228 | 0,03528 | NA | NA |
| 1,143930973 | 0,17256 | 0,89688816  | 0,04522 | NA | NA |
| 0,778624691 | 0,18612 | 0,76154437  | 0,00017 | NA | NA |
| 1,112650121 | 0,44452 | 1,171210181 | 0,00619 | NA | NA |
| 1,093535457 | 0,2164  | 1,102669163 | 0,03524 | NA | NA |
| 0,893785162 | 0,52806 | 0,801069878 | 0,0094  | NA | NA |
| 0,825877665 | 0,4903  | 0,630688704 | 0,00641 | NA | NA |
| 1,015366101 | 0,84005 | 1,117287138 | 0,01228 | NA | NA |
| 0,804966138 | 0,26846 | 0,736623843 | 0,00479 | NA | NA |
| 0,819604608 | 0,17716 | 0,801069878 | 0,00438 | NA | NA |
| 1,147902414 | 0,19875 | 1,17609125  | 0,00305 | NA | NA |
| 0,741233505 | 0,0535  | 0,634635443 | 0       | NA | NA |
| 0,86934456  | 0,10499 | 0,69495911  | 0,00026 | NA | NA |
| 0,977385766 | 0,76325 | 0,888842681 | 0,0454  | NA | NA |
| 1,332374825 | 0,05616 | 1,162314108 | 0,00558 | NA | NA |
| 0,573156093 | 0,06933 | 0,700763725 | 0,00312 | NA | NA |
| 1,0132569   | 0,93671 | 0,671751713 | 0       | NA | NA |
| 0,852634892 | 0,29166 | 0,730016005 | 0,00241 | NA | NA |
| 1,037419937 | 0,55039 | 1,125058485 | 0,03047 | NA | NA |
| 0,672683604 | 0,06679 | 0,607097442 | 0,00088 | NA | NA |
| 1,407368375 | 0,09244 | 1,208317843 | 0,02298 | NA | NA |
| 0,792784137 | 0,29011 | 0,65747138  | 0,00205 | NA | NA |
| 1,085981856 | 0,56707 | 1,235418637 | 0,01221 | NA | NA |
| 0,925304428 | 0,61976 | 0,650220073 | 0,00043 | NA | NA |
| 1,074749173 | 0,4695  | 1,147902414 | 0,04399 | NA | NA |
| 1,121166078 | 0,44737 | 0,893785162 | 0,02267 | NA | NA |
| 0,708087719 | 0,11228 | 0,721464343 | 0,00189 | NA | NA |
| 0,800514811 | 0,25197 | 0,762600827 | 0,0095  | NA | NA |
| 0,893785162 | 0,3244  | 1,127400412 | 0,03824 | NA | NA |
| 1,092777739 | 0,70558 | 1,408344227 | 0,00194 | NA | NA |
| 0,881480158 | 0,1718  | 0,768970416 | 0,00029 | NA | NA |
| 0,721964598 | 0,09855 | 0,775930854 | 0,00353 | NA | NA |
| 0,846745312 | 0,44402 | 0,641712949 | 0,00004 | NA | NA |
| 0,918276162 | 0,75049 | 0,722966147 | 0,00673 | NA | NA |
| 1,263127262 | 0,11645 | 1,196648963 | 0,04436 | NA | NA |
| 0,974004269 | 0,8709  | 0,817335328 | 0,04132 | NA | NA |
| 0,97874165  | 0,80516 | 1,170398641 | 0,01236 | NA | NA |
| 1,052631155 | 0,75137 | 0,898132373 | 0,02087 | NA | NA |
| 1,038859103 | 0,86478 | 0,811689581 | 0,00216 | NA | NA |
| 0,905006463 | 0,49677 | 0,843815796 | 0,03846 | NA | NA |
| 1,081474763 | 0,69817 | 0,898132373 | 0,03397 | NA | NA |
| 1,048989328 | 0,57952 | 1,152686347 | 0,02598 | NA | NA |
| 0,886996305 | 0,49335 | 0,843815796 | 0,00847 | NA | NA |
| 1,095811766 | 0,43859 | 1,159095952 | 0,02393 | NA | NA |
| 0,898132373 | 0,55765 | 0,844400887 | 0,01863 | NA | NA |
| 0,824162085 | 0,18559 | 0,759435845 | 0,00327 | NA | NA |
| 1,266634254 | 0,0647  | 1,247465572 | 0,00461 | NA | NA |
| 0,759435845 | 0,18919 | 0,7031966   | 0,00426 | NA | NA |
| 0,890075733 | 0,36236 | 0,806082831 | 0,00779 | NA | NA |
| 0,827023368 | 0,46574 | 0,70514898  | 0,00216 | NA | NA |
| 0,661127303 | 0,09836 | 0,756808396 | 0,00872 | NA | NA |
| 1,070288698 | 0,51544 | 0,792784137 | 0,0207  | NA | NA |
| 0,828170661 | 0,43304 | 0,748980467 | 0,00001 | NA | NA |
| 0,918276162 | 0,29022 | 0,869947353 | 0,00984 | NA | NA |
| 1,102669163 | 0,3584  | 1,255271991 | 0,00022 | NA | NA |
| 0,851453708 | 0,17287 | 0,837987135 | 0,01517 | NA | NA |
| 1,057018041 | 0,62448 | 0,851453708 | 0,00292 | NA | NA |
| 0,895025071 | 0,28622 | 0,886381699 | 0,02629 | NA | NA |
| 0,898132373 | 0,59575 | 0,774855931 | 0,00015 | NA | NA |
| 1,379360922 | 0,08488 | 1,173648178 | 0,00746 | NA | NA |
| 1,099616149 | 0,36462 | 1,118061851 | 0,01261 | NA | NA |
| 0,957935218 | 0,5796  | 0,852634892 | 0,02965 | NA | NA |
| 0,815072332 | 0,45965 | 0,782411782 | 0,01197 | NA | NA |
| 1,299539062 | 0,49756 | 0,825305409 | 0,02654 | NA | NA |
| 0,975355462 | 0,9065  | 0,777007269 | 0,00109 | NA | NA |
| 0,955282936 | 0,70499 | 0,734584317 | 0,00001 | NA | NA |
| 0,806082831 | 0,07705 | 0,899378312 | 0,02681 | NA | NA |
| 1,162314108 | 0,14793 | 1,116512962 | 0,00619 | NA | NA |
| 0,869947353 | 0,67057 | 0,651122095 | 0,00125 | NA | NA |
| 0,931740429 | 0,59002 | 0,785128119 | 0,00186 | NA | NA |
| 1,123499903 | 0,34391 | 1,16634937  | 0,01805 | NA | NA |
| 1,120389214 | 0,31059 | 1,113421618 | 0,04619 | NA | NA |
| 0,803293997 | 0,06106 | 0,727994774 | 0,00002 | NA | NA |
| 0,986232704 | 0,91349 | 0,762600827 | 0,00416 | NA | NA |
| 0,918276162 | 0,41363 | 0,869947353 | 0,03061 | NA | NA |
| 1,039579435 | 0,61577 | 0,910669834 | 0,04674 | NA | NA |
| 0,833931044 | 0,5435  | 0,602486157 | 0,00095 | NA | NA |
| 0,906890329 | 0,60598 | 0,81056512  | 0,02915 | NA | NA |
| 1,130530567 | 0,30345 | 1,101141598 | 0,04027 | NA | NA |

|             |         |             |         |    |    |
|-------------|---------|-------------|---------|----|----|
| 0,773246337 | 0,20461 | 0,873572896 | 0,02607 | NA | NA |
| 0,901875378 | 0,44379 | 0,866937564 | 0,01709 | NA | NA |
| 1,251796459 | 0,0536  | 1,135242102 | 0,01996 | NA | NA |
| 1,080725402 | 0,41801 | 1,171210181 | 0,01166 | NA | NA |
| 0,853226098 | 0,32641 | 0,784584098 | 0,00221 | NA | NA |
| 0,951318276 | 0,77938 | 0,69399636  | 0,00359 | NA | NA |
| 1,129747215 | 0,12013 | 1,151887642 | 0,03083 | NA | NA |
| 1,067325338 | 0,73342 | 0,873572896 | 0,00684 | NA | NA |
| 1,118837101 | 0,46211 | 0,890692901 | 0,03363 | NA | NA |
| 1,131314463 | 0,48345 | 0,885767519 | 0,03714 | NA | NA |
| 1,151089491 | 0,15652 | 1,135242102 | 0,01531 | NA | NA |
| 0,87175824  | 0,56574 | 0,687294348 | 0,00236 | NA | NA |
| 0,920825697 | 0,32052 | 0,910038824 | 0,03592 | NA | NA |
| 0,931740429 | 0,65186 | 0,808881348 | 0,04277 | NA | NA |
| 1,092777739 | 0,32055 | 1,147107024 | 0,01062 | NA | NA |
| 1,128964405 | 0,10023 | 1,196648963 | 0,01131 | NA | NA |
| 1,00486382  | 0,94241 | 0,901250463 | 0,02143 | NA | NA |
| 1,082224645 | 0,41744 | 1,093535457 | 0,03688 | NA | NA |
| 0,899378312 | 0,30654 | 1,129747215 | 0,00556 | NA | NA |
| 1,154285418 | 0,21246 | 1,142346247 | 0,04006 | NA | NA |
| 1,112650121 | 0,29768 | 1,190031696 | 0,00745 | NA | NA |
| 1,093535457 | 0,83115 | 0,682546859 | 0,00007 | NA | NA |
| 1,120389214 | 0,21775 | 1,251796459 | 0,00024 | NA | NA |
| 1,033830736 | 0,72895 | 1,20664392  | 0,02827 | NA | NA |
| 0,929804943 | 0,5883  | 0,815637493 | 0,00392 | NA | NA |
| 1,121166078 | 0,24608 | 1,250062303 | 0,02549 | NA | NA |
| 1,173648178 | 0,15828 | 1,194163187 | 0,00429 | NA | NA |
| 0,826450318 | 0,49763 | 0,610050255 | 0,00016 | NA | NA |
| 1,101141598 | 0,33504 | 0,823591017 | 0,00772 | NA | NA |
| 0,926588062 | 0,62447 | 0,791137301 | 0,00134 | NA | NA |
| 0,85027416  | 0,26563 | 0,777546036 | 0,02775 | NA | NA |
| 1,170398641 | 0,36457 | 1,25962998  | 0,03902 | NA | NA |
| 0,906261938 | 0,6689  | 0,852634892 | 0,03852 | NA | NA |
| 0,837987135 | 0,38779 | 0,660211421 | 0,0003  | NA | NA |
| 0,691595315 | 0,14795 | 0,69495911  | 0,00371 | NA | NA |
| 0,939522749 | 0,61209 | 0,799960128 | 0,00999 | NA | NA |
| 0,839731493 | 0,34455 | 0,725476104 | 0,00207 | NA | NA |
| 1,21167266  | 0,4666  | 0,823591017 | 0,02653 | NA | NA |
| 1,108800644 | 0,32002 | 1,105730653 | 0,04332 | NA | NA |
| 1,143930973 | 0,14349 | 1,138394029 | 0,01237 | NA | NA |
| 1,065846736 | 0,57231 | 1,081474763 | 0,0436  | NA | NA |
| 1,033114388 | 0,74154 | 1,141554707 | 0,01167 | NA | NA |
| 1,22858698  | 0,44413 | 0,805524291 | 0,01404 | NA | NA |
| 1,199971382 | 0,10113 | 1,172022284 | 0,01321 | NA | NA |
| 1,043911927 | 0,68117 | 1,132883885 | 0,0205  | NA | NA |
| 0,767373048 | 0,14617 | 0,631126016 | 0,00002 | NA | NA |
| 0,989656656 | 0,86229 | 0,906890329 | 0,01664 | NA | NA |
| 0,783497187 | 0,18188 | 0,804966138 | 0,00087 | NA | NA |
| 0,961260928 | 0,67297 | 0,858565436 | 0,01122 | NA | NA |
| 1,080725402 | 0,32995 | 1,086734863 | 0,04754 | NA | NA |
| 1,112650121 | 0,30283 | 1,191682575 | 0,00329 | NA | NA |
| 0,862143545 | 0,36666 | 0,815072332 | 0,01936 | NA | NA |
| 0,917639882 | 0,69608 | 0,813379198 | 0,00154 | NA | NA |
| 1,095811766 | 0,46188 | 1,209994089 | 0,02485 | NA | NA |
| 1,190031696 | 0,09052 | 1,217566019 | 0,00348 | NA | NA |
| 0,656560563 | 0,05748 | 0,651122095 | 0,00064 | NA | NA |
| 0,934327347 | 0,78599 | 0,826450318 | 0,01042 | NA | NA |
| 1,135242102 | 0,11009 | 1,114966219 | 0,04518 | NA | NA |
| 1,207480591 | 0,07938 | 1,189207115 | 0,00249 | NA | NA |
| 1,160703914 | 0,37336 | 0,847332435 | 0,00099 | NA | NA |
| 0,736113431 | 0,20767 | 0,593779833 | 0,00005 | NA | NA |
| 1,189207115 | 0,14985 | 1,150291893 | 0,02518 | NA | NA |
| 1,00556058  | 0,93513 | 0,853226098 | 0,00633 | NA | NA |
| 0,87175824  | 0,64247 | 0,726986259 | 0,00205 | NA | NA |
| 1,153485605 | 0,17884 | 1,207480591 | 0,00205 | NA | NA |
| 0,829894586 | 0,1785  | 0,770037174 | 0,00274 | NA | NA |
| 0,86154616  | 0,26499 | 0,855002178 | 0,00279 | NA | NA |
| 1,125838586 | 0,20901 | 1,318593614 | 0,00016 | NA | NA |
| 0,953959551 | 0,54515 | 1,163926534 | 0,00354 | NA | NA |
| 0,96727633  | 0,69016 | 0,880869374 | 0,03678 | NA | NA |
| 1,072516617 | 0,59395 | 1,185914499 | 0,00393 | NA | NA |
| 1,077733145 | 0,4379  | 1,160703914 | 0,00455 | NA | NA |
| 1,01395948  | 0,83835 | 1,152686347 | 0,00822 | NA | NA |
| 0,737134609 | 0,34865 | 0,645728675 | 0,0002  | NA | NA |
| 1,020304659 | 0,93962 | 0,767373048 | 0,02735 | NA | NA |
| 0,688247801 | 0,11889 | 0,866336856 | 0,03638 | NA | NA |
| 1,132883885 | 0,23936 | 1,144724161 | 0,01718 | NA | NA |
| 1,114193651 | 0,49778 | 0,835666959 | 0,02092 | NA | NA |
| 0,793333843 | 0,2999  | 0,804966138 | 0,03948 | NA | NA |
| 0,789493887 | 0,10409 | 0,847919965 | 0,0226  | NA | NA |
| 1,172022284 | 0,06649 | 1,178539408 | 0,00231 | NA | NA |
| 1,042465761 | 0,8434  | 0,821310701 | 0,03876 | NA | NA |
| 0,883315051 | 0,51279 | 0,723969086 | 0,00002 | NA | NA |
| 0,993092495 | 0,96207 | 1,180174343 | 0,04348 | NA | NA |
| 1,057750964 | 0,44081 | 1,192508872 | 0,00216 | NA | NA |
| 1,106497353 | 0,69995 | 0,855002178 | 0,0372  | NA | NA |
| 1,114966219 | 0,26318 | 1,140763716 | 0,00542 | NA | NA |
| 0,765248385 | 0,24146 | 0,698339266 | 0,0045  | NA | NA |
| 1,153485605 | 0,12314 | 1,204972315 | 0,00368 | NA | NA |
| 0,93109482  | 0,63652 | 0,790041312 | 0,00126 | NA | NA |
| 1,102669163 | 0,77553 | 0,665264521 | 0,00027 | NA | NA |
| 1,137605228 | 0,20795 | 1,128964405 | 0,03002 | NA | NA |
| 0,915099168 | 0,25547 | 0,801625329 | 0,00228 | NA | NA |
| 0,912565489 | 0,84601 | 0,66342257  | 0,00524 | NA | NA |
| 0,91383145  | 0,29397 | 0,891310496 | 0,04161 | NA | NA |
| 0,839149637 | 0,15077 | 0,854409741 | 0,00369 | NA | NA |
| 0,886381699 | 0,22548 | 0,77916458  | 0,00887 | NA | NA |
| 1,024556823 | 0,73929 | 1,151089491 | 0,02104 | NA | NA |
| 0,771640088 | 0,06323 | 0,777546036 | 0,02318 | NA | NA |
| 0,855002178 | 0,31913 | 0,685391402 | 0,00092 | NA | NA |
| 0,986232704 | 0,86543 | 1,093535457 | 0,02951 | NA | NA |
| 0,85027416  | 0,33267 | 0,791137301 | 0,00053 | NA | NA |
| 1,033830736 | 0,6956  | 1,180992661 | 0,00574 | NA | NA |
| 1,057018041 | 0,46549 | 1,199139914 | 0,00201 | NA | NA |

|             |         |             |         |       |                                                       |
|-------------|---------|-------------|---------|-------|-------------------------------------------------------|
| 0,89688816  | 0,21739 | 0,853226098 | 0,00551 | NA    | NA                                                    |
| 1,093535457 | 0,32516 | 1,215879283 | 0,00384 | NA    | NA                                                    |
| 1,052631155 | 0,8067  | 0,783497187 | 0,0013  | NA    | NA                                                    |
| 0,884540435 | 0,43958 | 0,778085177 | 0,00793 | NA    | NA                                                    |
| 1,000693387 | 0,99673 | 0,863339559 | 0,01968 | NA    | NA                                                    |
| 1,155886707 | 0,13795 | 1,157490217 | 0,01375 | NA    | NA                                                    |
| 0,992404375 | 0,95427 | 0,782954296 | 0,00051 | NA    | NA                                                    |
| 0,840313752 | 0,45288 | 0,782411782 | 0,00293 | NA    | NA                                                    |
| 0,971307496 | 0,80844 | 1,128964405 | 0,03175 | NA    | NA                                                    |
| 0,957935218 | 0,63774 | 1,129747215 | 0,03969 | NA    | NA                                                    |
| 0,910669834 | 0,39113 | 0,824733549 | 0,01024 | NA    | NA                                                    |
| 0,90312651  | 0,59838 | 0,762600827 | 0,03592 | NA    | NA                                                    |
| 1,077733145 | 0,4683  | 0,877821798 | 0,02377 | NA    | NA                                                    |
| 1,014662547 | 0,90311 | 1,209994089 | 0,00186 | NA    | NA                                                    |
| 1,091263877 | 0,31117 | 1,113421618 | 0,02967 | NA    | NA                                                    |
| 0,935623498 | 0,62092 | 1,190856849 | 0,04457 | NA    | NA                                                    |
| 0,809442217 | 0,17886 | 0,864537231 | 0,039   | NA    | NA                                                    |
| 0,816203046 | 0,07015 | 0,886381699 | 0,02815 | NA    | NA                                                    |
| 0,840313752 | 0,28846 | 0,827596816 | 0,00572 | NA    | NA                                                    |
| 1,011853201 | 0,88159 | 1,139973273 | 0,00226 | NA    | NA                                                    |
| 0,988970916 | 0,91113 | 0,856188285 | 0,00176 | NA    | NA                                                    |
| 1,123499903 | 0,26039 | 1,184271612 | 0,00491 | NA    | NA                                                    |
| 0,880259014 | 0,63949 | 0,644834125 | 0,00001 | NA    | NA                                                    |
| 0,986916546 | 0,87095 | 0,8962667   | 0,023   | NA    | NA                                                    |
| 0,936272247 | 0,74837 | 0,826450318 | 0,04416 | NA    | NA                                                    |
| 0,952637998 | 0,83298 | 0,713507253 | 0,0012  | NA    | NA                                                    |
| 0,693515485 | 0,05571 | 0,702222438 | 0,00245 | NA    | NA                                                    |
| 0,973329374 | 0,82969 | 0,802737389 | 0,00409 | NA    | NA                                                    |
| 1,039579435 | 0,68939 | 0,901875378 | 0,01751 | NA    | NA                                                    |
| 1,137605228 | 0,4205  | 0,87417862  | 0,01736 | NA    | NA                                                    |
| 1,155886707 | 0,18459 | 1,185914499 | 0,0029  | NA    | NA                                                    |
| 1,043911927 | 0,83687 | 0,876605721 | 0,00819 | NA    | NA                                                    |
| 1,100378609 | 0,38682 | 1,205807828 | 0,00021 | NA    | NA                                                    |
| 0,822450069 | 0,12376 | 0,757858283 | 0,00012 | NA    | NA                                                    |
| 0,980099415 | 0,7681  | 0,87175824  | 0,00201 | NA    | NA                                                    |
| 1,035982764 | 0,69423 | 1,194163187 | 0,00736 | NA    | NA                                                    |
| 1,200803427 | 0,08634 | 1,129747215 | 0,01922 | NA    | NA                                                    |
| 0,991029563 | 0,92817 | 1,148698355 | 0,0459  | NA    | NA                                                    |
| 0,704660378 | 0,14184 | 0,787307977 | 0,00568 | NA    | NA                                                    |
| 0,974004269 | 0,81157 | 1,119612889 | 0,04989 | NA    | NA                                                    |
| 0,684441907 | 0,10723 | 0,708578698 | 0,00035 | NA    | NA                                                    |
| 1,125838586 | 0,33063 | 1,180992661 | 0,02154 | NA    | NA                                                    |
| 0,890692901 | 0,28995 | 0,856188285 | 0,02637 | NA    | NA                                                    |
| 0,853226098 | 0,56078 | 0,693034943 | 0,01064 | NA    | NA                                                    |
| 1,114966219 | 0,34969 | 1,209155676 | 0,00636 | NA    | NA                                                    |
| 0,733058379 | 0,14535 | 0,859756486 | 0,02644 | NA    | NA                                                    |
| 1,080725402 | 0,55116 | 1,112650121 | 0,04131 | NA    | NA                                                    |
| 0,844400887 | 0,1784  | 0,808881348 | 0,02783 | NA    | NA                                                    |
| 0,938221197 | 0,50063 | 0,79774524  | 0,04119 | NA    | NA                                                    |
| 0,993781093 | 0,937   | 1,167158102 | 0,0114  | NA    | NA                                                    |
| 0,849684999 | 0,18918 | 0,789493887 | 0,00094 | NA    | NA                                                    |
| 1,038139271 | 0,74354 | 1,121166078 | 0,02307 | NA    | NA                                                    |
| 0,76630998  | 0,22979 | 0,682073917 | 0,00018 | NA    | NA                                                    |
| 0,89688816  | 0,27412 | 0,783497187 | 0,00065 | NA    | NA                                                    |
| 0,713012859 | 0,06793 | 0,672217497 | 0,00012 | NA    | NA                                                    |
| 0,923382311 | 0,55793 | 0,785672517 | 0,02522 | NA    | NA                                                    |
| 0,847332435 | 0,15175 | 0,791685866 | 0,00446 | NA    | NA                                                    |
| 1,149494848 | 0,1853  | 1,152686347 | 0,02723 | NA    | NA                                                    |
| 1,080725402 | 0,66878 | 0,872967591 | 0,02309 | NA    | NA                                                    |
| 1,190856849 | 0,09498 | 1,187559666 | 0,00612 | NA    | NA                                                    |
| 0,717972255 | 0,18177 | 0,652929894 | 0,00149 | NA    | NA                                                    |
| 1,088997015 | 0,37474 | 1,230291345 | 0,0016  | NA    | NA                                                    |
| 0,74277646  | 0,19213 | 0,855002178 | 0,04375 | NA    | NA                                                    |
| 1,002776436 | 0,98641 | 0,790041312 | 0,006   | NA    | NA                                                    |
| 0,823591017 | 0,28605 | 0,774855931 | 0,03693 | NA    | NA                                                    |
| 1,008352455 | 0,92908 | 1,175276328 | 0,0052  | NA    | NA                                                    |
| 1,025978145 | 0,8149  | 1,116512962 | 0,04619 | NA    | NA                                                    |
| 1,029540083 | 0,88018 | 0,774319028 | 0,00256 | NA    | NA                                                    |
| 1,035264924 | 0,68681 | 1,118061851 | 0,03143 | NA    | NA                                                    |
| 0,862143545 | 0,35713 | 0,842062954 | 0,01107 | NA    | NA                                                    |
| 1,121166078 | 0,11863 | 1,118837101 | 0,0327  | NA    | NA                                                    |
| 0,905633983 | 0,54531 | 0,634635443 | 0,00863 | NA    | NA                                                    |
| 1,0453601   | 0,76875 | 0,734075318 | 0,01241 | NA    | NA                                                    |
| 0,802181166 | 0,10552 | 0,785672517 | 0,00171 | NA    | NA                                                    |
| 1,154285418 | 0,28849 | 1,141554707 | 0,02174 | NA    | NA                                                    |
| 1,143930973 | 0,18426 | 1,150291893 | 0,01266 | NA    | NA                                                    |
| 0,984866443 | 0,91109 | 0,846745312 | 0,02085 | NA    | NA                                                    |
| 0,695923196 | 0,22635 | 0,552865327 | 0,00375 | NA    | NA                                                    |
| 0,753145233 | 0,33096 | 0,631126016 | 0,00967 | NA    | NA                                                    |
| 0,750019495 | 0,29072 | 0,61301743  | 0,00923 | NA    | NA                                                    |
| 0,752101876 | 0,28458 | 0,651573575 | 0,01321 | NA    | NA                                                    |
| 0,778085177 | 0,33502 | 0,645281245 | 0,01489 | NA    | NA                                                    |
| 0,779704843 | 0,29661 | 0,698823486 | 0,01183 | NA    | NA                                                    |
| 0,768970416 | 0,27046 | 0,676424116 | 0,01893 | NA    | NA                                                    |
| 0,809442217 | 0,23316 | 0,733058379 | 0,006   | NA    | NA                                                    |
| 0,852634892 | 0,36754 | 0,763658749 | 0,01718 | NA    | NA                                                    |
| 0,724471077 | 0,52581 | 0,550570799 | 0,02094 | NA    | NA                                                    |
| 0,699792933 | 0,30655 | 0,616853585 | 0,0082  | NA    | NA                                                    |
| 1,02313747  | 0,824   | 1,208317843 | 0,00182 | NA    | NA                                                    |
| 0,351354675 | 0,12935 | 0,285982743 | 0,00026 | NA    | NA                                                    |
| 0,656560563 | 0,1403  | 0,670356296 | 0,01825 | NA    | NA                                                    |
| 0,658839976 | 0,44501 | 0,625898229 | 0,0377  | NA    | NA                                                    |
| 0,867538687 | 0,59343 | 0,648869383 | 0,03576 | NA    | NA                                                    |
| 0,798298386 | 0,35643 | 0,639492791 | 0,00387 | NA    | NA                                                    |
| 0,719965659 | 0,27204 | 0,571569168 | 0,00485 | NA    | NA                                                    |
| 0,726986259 | 0,2355  | 0,570777354 | 0,0031  | NA    | NA                                                    |
| 0,771640088 | 0,29044 | 0,657927263 | 0,00887 | NA    | NA                                                    |
| 0,781869643 | 0,36115 | 0,671751713 | 0,01314 | NA    | NA                                                    |
| 0,829319546 | 0,40949 | 0,705637922 | 0,00819 | NA    | NA                                                    |
| 0,797192477 | 0,26449 | 0,703684188 | 0,01481 | NA    | NA                                                    |
| 0,85027416  | 0,25935 | 0,801625329 | 0,00516 | NA    | NA                                                    |
| 0,864537231 | 0,31661 | 0,780786493 | 0,0092  | NA    | NA                                                    |
| 0,553632292 | 0,13021 | 0,607097442 | 0       | NAA15 | N(alpha)-acetyltransferase 15, NatA auxiliary subunit |
| 0,767373048 | 0,11227 | 0,681129017 | 0,01495 | NAA15 | N(alpha)-acetyltransferase 15, NatA auxiliary subunit |

|             |         |             |         |          |                                                                                   |
|-------------|---------|-------------|---------|----------|-----------------------------------------------------------------------------------|
| 0,885153765 | 0,59056 | 0,774855931 | 0,00145 | NAA15    | N(alpha)-acetyltransferase 15, NatA auxiliary subunit                             |
| 0,809442217 | 0,464   | 0,819604608 | 0,00485 | NAA16    | N(alpha)-acetyltransferase 16, NatA auxiliary subunit                             |
| 0,820741609 | 0,07684 | 0,790589117 | 0,01804 | NAA25    | N(alpha)-acetyltransferase 25, NatB auxiliary subunit                             |
| 0,813943185 | 0,3489  | 0,835666959 | 0,00373 | NAA30    | N(alpha)-acetyltransferase 30, NatC catalytic subunit                             |
| 0,798851916 | 0,05474 | 0,839149637 | 0,02042 | NAA35    | N(alpha)-acetyltransferase 35, NatC auxiliary subunit                             |
| 0,724471077 | 0,31992 | 0,747942879 | 0,00004 | NAA35    | N(alpha)-acetyltransferase 35, NatC auxiliary subunit                             |
| 0,912565489 | 0,26965 | 0,875998315 | 0,00222 | NAA38    | N(alpha)-acetyltransferase 38, NatC auxiliary subunit                             |
| 0,96996191  | 0,8655  | 0,729004689 | 0,00128 | NAA38    | N(alpha)-acetyltransferase 38, NatC auxiliary subunit                             |
| 1,132883885 | 0,44994 | 1,220946513 | 0,00591 | NAA40    | N(alpha)-acetyltransferase 40, NatD catalytic subunit, homolog (S. cerevisiae)    |
| 1,427014506 | 0,07642 | 1,262970886 | 0,00117 | NAA40    | N(alpha)-acetyltransferase 40, NatD catalytic subunit, homolog (S. cerevisiae)    |
| 0,838568184 | 0,55158 | 0,726482525 | 0,00012 | NAA50    | N(alpha)-acetyltransferase 50, NatE catalytic subunit                             |
| 1,114966219 | 0,27187 | 1,142346247 | 0,02222 | NAAA     | N-acylethanolamine acid amidase                                                   |
| 1,088997015 | 0,4182  | 1,185092771 | 0,012   | NAALADL1 | N-acetylated alpha-linked acidic dipeptidase-like 1                               |
| 0,752623374 | 0,10472 | 0,802181166 | 0,00099 | NAB1     | NGF-A binding protein 1 (EGR1 binding protein 1)                                  |
| 0,908778116 | 0,21787 | 0,923382311 | 0,04083 | NACAP1   | nascent-polypeptide-associated complex alpha polypeptide pseudogene 1             |
| 0,86934456  | 0,33447 | 0,830470024 | 0,00654 | NACC2    | NACC family member 2, BEN and BTB (POZ) domain containing                         |
| 1,118061851 | 0,25856 | 1,186736798 | 0,01755 | NACC2    | NACC family member 2, BEN and BTB (POZ) domain containing                         |
| 1,07549439  | 0,55558 | 1,132098902 | 0,04011 | NADK     | NAD kinase                                                                        |
| 0,846745312 | 0,35221 | 0,770571108 | 0,00126 | NADKD1   | NAD kinase domain containing 1                                                    |
| 0,981459064 | 0,92119 | 0,77271055  | 0,01123 | NADKD1   | NAD kinase domain containing 1                                                    |
| 0,739181216 | 0,06803 | 0,790041312 | 0,00107 | NADSYN1  | NAD synthetase 1                                                                  |
| 0,974004269 | 0,8942  | 0,756283999 | 0,00549 | NAF1     | nuclear assembly factor 1 homolog (S. cerevisiae)                                 |
| 1,424050196 | 0,05192 | 1,402499251 | 0,00067 | NAGLU    | N-acetylglucosaminidase, alpha                                                    |
| 1,179356592 | 0,05301 | 1,111108729 | 0,04185 | NAIF1    | nuclear apoptosis inducing factor 1                                               |
| 0,943438251 | 0,77073 | 0,76630998  | 0,00877 | NAMPT    | nicotinamide phosphoribosyltransferase                                            |
| 0,906890329 | 0,65743 | 0,827023368 | 0,02189 | NANOG    | Nanog homeobox                                                                    |
| 1,042465761 | 0,87659 | 0,797192477 | 0,00415 | NANOS1   | nanos homolog 1 (Drosophila)                                                      |
| 0,933679945 | 0,56788 | 0,870550563 | 0,02444 | NANP     | N-acetylnneuraminic acid phosphatase                                              |
| 1           | 0,99878 | 0,76418826  | 0,00197 | NAP1L1   | nucleosome assembly protein 1-like 1                                              |
| 0,89688816  | 0,49525 | 0,848507902 | 0,01616 | NAP1L1   | nucleosome assembly protein 1-like 1                                              |
| 0,815072332 | 0,31634 | 0,848507902 | 0,01837 | NAP1L1   | nucleosome assembly protein 1-like 1                                              |
| 1,20664392  | 0,17733 | 0,853817714 | 0,02708 | NAP1L2   | nucleosome assembly protein 1-like 2                                              |
| 0,988285652 | 0,96392 | 0,713507253 | 0,00026 | NAP1L5   | nucleosome assembly protein 1-like 5                                              |
| 0,917004043 | 0,62906 | 0,810003474 | 0,04355 | NAPG     | N-ethylmaleimide-sensitive factor attachment protein, gamma                       |
| 1,135242102 | 0,08921 | 1,106497353 | 0,03956 | NAPSA    | napsin A aspartic peptidase                                                       |
| 0,813379198 | 0,16983 | 0,863938187 | 0,00148 | NARS     | asparaginyl-tRNA synthetase                                                       |
| 0,740206649 | 0,08881 | 0,862741345 | 0,03128 | NASP     | nuclear autoantigenic sperm protein (histone-binding)                             |
| 0,831045862 | 0,32865 | 0,711038705 | 0,00658 | NAT1     | N-acetyltransferase 1 (arylamine N-acetyltransferase)                             |
| 0,898755127 | 0,48352 | 0,832757751 | 0,00882 | NAV1     | neuron navigator 1                                                                |
| 1,009051634 | 0,96551 | 0,722465199 | 0,00019 | NAV1     | neuron navigator 1                                                                |
| 1,16634937  | 0,06383 | 1,154285418 | 0,02132 | NAV2-AS4 | NAV2 antisense RNA 4 (non-protein coding)                                         |
| 0,866336856 | 0,09438 | 0,831045862 | 0,03828 | NBAS     | neuroblastoma amplified sequence                                                  |
| 0,681601304 | 0,0721  | 0,712518807 | 0,02319 | NBEAL1   | neurobeachin-like 1                                                               |
| 0,804966138 | 0,29331 | 0,90000193  | 0,03809 | NBN      | nibrin                                                                            |
| 0,940826108 | 0,68051 | 0,816203046 | 0,01626 | NBN      | nibrin                                                                            |
| 0,929160674 | 0,70423 | 0,81056512  | 0,0054  | NBPF1    | neuroblastoma breakpoint family, member 1                                         |
| 1,062895674 | 0,79058 | 1,601029621 | 0,00001 | NBPF10   | neuroblastoma breakpoint family, member 10                                        |
| 0,781869643 | 0,07723 | 0,827596816 | 0,00706 | NBPF3    | neuroblastoma breakpoint family, member 3                                         |
| 0,701735863 | 0,05258 | 0,811689581 | 0,01125 | NCAPG    | non-SMC condensin I complex, subunit G                                            |
| 0,856188285 | 0,26684 | 0,881480158 | 0,03058 | NCBP2    | nuclear cap binding protein subunit 2, 20kDa                                      |
| 0,734584317 | 0,21021 | 0,759435845 | 0,00332 | NCKAP1   | NCK-associated protein 1                                                          |
| 0,724973416 | 0,35369 | 0,675955417 | 0,02327 | NCKAP1   | NCK-associated protein 1                                                          |
| 1,033114388 | 0,90667 | 0,746906729 | 0,00038 | NCKAP5   | NCK-associated protein 5                                                          |
| 1,052631155 | 0,61911 | 1,146312186 | 0,01979 | NCKIPSD  | NCK interacting protein with SH3 domain                                           |
| 0,784584098 | 0,17362 | 0,804408371 | 0,00151 | NCOA1    | nuclear receptor coactivator 1                                                    |
| 0,955945318 | 0,56147 | 0,89688816  | 0,01308 | NCOA3    | nuclear receptor coactivator 3                                                    |
| 1,167967395 | 0,10199 | 1,224336392 | 0,013   | NCOA3    | nuclear receptor coactivator 3                                                    |
| 0,948026965 | 0,74563 | 0,851453708 | 0,01806 | NCOR1    | nuclear receptor corepressor 1                                                    |
| 0,851453708 | 0,21129 | 0,855002178 | 0,01206 | NCOR1    | nuclear receptor corepressor 1                                                    |
| 1,171210181 | 0,18731 | 1,179356592 | 0,01517 | NCOR2    | nuclear receptor corepressor 2                                                    |
| 1,161508732 | 0,14407 | 1,264879542 | 0,00011 | NCOR2    | nuclear receptor corepressor 2                                                    |
| 1,19335743  | 0,23321 | 1,190031696 | 0,0055  | NCR1     | natural cytotoxicity triggering receptor 1                                        |
| 0,965936329 | 0,78675 | 0,897510051 | 0,03815 | NCR2     | natural cytotoxicity triggering receptor 2                                        |
| 1,116512962 | 0,31457 | 1,117287138 | 0,01341 | NCSTN    | nicastatin                                                                        |
| 0,723969086 | 0,05444 | 0,736623843 | 0,00006 | NDC80    | NDC80 homolog, kinetochore complex component (S. cerevisiae)                      |
| 0,743291492 | 0,0845  | 0,78024548  | 0,00038 | NDE1     | nudE nuclear distribution gene E homolog 1 (A. nidulans)                          |
| 0,771640088 | 0,07654 | 0,806082831 | 0,00846 | NDE1     | nudE nuclear distribution gene E homolog 1 (A. nidulans)                          |
| 0,778085177 | 0,16328 | 0,790041312 | 0,03633 | NDFIP2   | Nedd4 family interacting protein 2                                                |
| 0,90062598  | 0,63502 | 0,816768991 | 0,04677 | NDFIP2   | Nedd4 family interacting protein 2                                                |
| 1,190856849 | 0,10585 | 1,212512819 | 0,00307 | NDOR1    | NADPH dependent diflavin oxidoreductase 1                                         |
| 0,621574834 | 0,06064 | 0,813943185 | 0,0135  | NDRG1    | N-myc downstream regulated 1                                                      |
| 0,978063473 | 0,86663 | 0,792234811 | 0,01009 | NDST1    | N-deacetylase/N-sulfotransferase (heparan glucosaminyl) 1                         |
| 1,16634937  | 0,15289 | 0,859756486 | 0,00398 | NDST2    | N-deacetylase/N-sulfotransferase (heparan glucosaminyl) 2                         |
| 1,089752112 | 0,19444 | 1,095052471 | 0,04224 | NDUFA10  | NADH dehydrogenase (ubiquinone) 1 alpha subcomplex, 10, 42kDa                     |
| 1,116512962 | 0,28412 | 1,149494848 | 0,00981 | NDUFA2   | NADH dehydrogenase (ubiquinone) 1 alpha subcomplex, 2, 8kDa                       |
| 0,793883931 | 0,36949 | 1,175276328 | 0,03894 | NDUFA3   | NADH dehydrogenase (ubiquinone) 1 alpha subcomplex, 3, 9kDa                       |
| 0,867538687 | 0,22776 | 0,883927531 | 0,01278 | NDUFA4   | NADH dehydrogenase (ubiquinone) 1 alpha subcomplex, 4, 9kDa                       |
| 0,777007269 | 0,17241 | 0,750019495 | 0,00038 | NDUFA5   | NADH dehydrogenase (ubiquinone) 1 alpha subcomplex, 5, 13kDa                      |
| 0,811127156 | 0,09266 | 0,883927531 | 0,01614 | NDUFAB1  | NADH dehydrogenase (ubiquinone) 1, alpha/beta subcomplex, 1, 8kDa                 |
| 1,048989328 | 0,75821 | 1,20664392  | 0,00146 | NDUFAB3  | NADH dehydrogenase (ubiquinone) 1 alpha subcomplex, assembly factor 3             |
| 0,887611337 | 0,58385 | 1,124278924 | 0,0283  | NDUFB11  | NADH dehydrogenase (ubiquinone) 1 beta subcomplex, 11, 17.3kDa                    |
| 1,125838586 | 0,27508 | 0,906890329 | 0,04677 | NDUFB4   | NADH dehydrogenase (ubiquinone) 1 beta subcomplex, 4, 15kDa                       |
| 1,101141598 | 0,57    | 0,868742185 | 0,02682 | NDUFB6   | NADH dehydrogenase (ubiquinone) 1 beta subcomplex, 6, 17kDa                       |
| 0,823020345 | 0,05159 | 0,780786493 | 0,00006 | NDUFB6   | NADH dehydrogenase (ubiquinone) 1 beta subcomplex, 6, 17kDa                       |
| 0,839731493 | 0,06537 | 0,860949188 | 0,00433 | NDUFB8   | NADH dehydrogenase (ubiquinone) 1 beta subcomplex, 8, 19kDa                       |
| 0,81056512  | 0,19206 | 0,855002178 | 0,01233 | NDUFC1   | NADH dehydrogenase (ubiquinone) 1, subcomplex unknown, 1, 6kDa                    |
| 0,792234811 | 0,08262 | 0,817335328 | 0,01407 | NDUF51   | NADH dehydrogenase (ubiquinone) Fe-S protein 1, 75kDa (NADH-coenzyme Q reductase) |
| 0,733566672 | 0,21117 | 0,620713746 | 0,00074 | NDUF51   | NADH dehydrogenase (ubiquinone) Fe-S protein 1, 75kDa (NADH-coenzyme Q reductase) |
| 0,615999037 | 0,34948 | 0,566834706 | 0,00001 | NEAT1    | nuclear paraspeckle assembly transcript 1 (non-protein coding)                    |
| 0,57236208  | 0,05649 | 0,580351957 | 0,00001 | NEBL     | nebulin                                                                           |
| 1,011152081 | 0,89693 | 1,245737416 | 0,00053 | NECAB2   | N-terminal EF-hand calcium binding protein 2                                      |
| 1,189207115 | 0,23244 | 1,31494276  | 0,00064 | NECAB3   | N-terminal EF-hand calcium binding protein 3                                      |
| 1,057018041 | 0,63031 | 1,186736798 | 0,02234 | NECAB3   | N-terminal EF-hand calcium binding protein 3                                      |
| 0,929804943 | 0,73296 | 0,849096246 | 0,02463 | NEDD1    | neural precursor cell expressed, developmentally down-regulated 1                 |
| 0,804408371 | 0,24938 | 0,755236293 | 0,0083  | NEDD4L   | neural precursor cell expressed, developmentally down-regulated 4-like            |
| 0,960594864 | 0,60023 | 0,87539133  | 0,04204 | NEDD4L   | neural precursor cell expressed, developmentally down-regulated 4-like            |
| 1,104198847 | 0,23259 | 1,143930973 | 0,0108  | NEDD9    | neural precursor cell expressed, developmentally down-regulated 9                 |
| 0,88315051  | 0,48578 | 0,736113431 | 0,0461  | NEGR1    | neuronal growth regulator 1                                                       |
| 1,156688184 | 0,17768 | 1,180174343 | 0,00115 | NEIL3    | nei endonuclease VIII-like 3 (E. coli)                                            |
| 0,71449707  | 0,11208 | 0,780786493 | 0,00036 | NEK1     | NIMA (never in mitosis gene a)-related kinase 1                                   |
| 1,084477409 | 0,39675 | 1,133669413 | 0,03213 | NEK1     | NIMA (never in mitosis gene a)-related kinase 1                                   |
| 1,194163187 | 0,0786  | 1,247465572 | 0,00848 | NEK6     | NIMA (never in mitosis gene a)-related kinase 6                                   |
| 1,062895674 | 0,51005 | 1,200803427 | 0,00733 | NEK6     | NIMA (never in mitosis gene a)-related kinase 6                                   |
| 1,063632673 | 0,38911 | 1,135242102 | 0,02378 | NEK6     | NIMA (never in mitosis gene a)-related kinase 6                                   |



|             |         |             |         |           |                                                                                               |
|-------------|---------|-------------|---------|-----------|-----------------------------------------------------------------------------------------------|
| 0,846158597 | 0,37258 | 0,821880187 | 0,01315 | NEK7      | NIMA (never in mitosis gene a)-related kinase 7                                               |
| 1,056285625 | 0,55355 | 1,151089491 | 0,01146 | NEK9      | NIMA (never in mitosis gene a)- related kinase 9                                              |
| 0,957271458 | 0,7099  | 1,199139914 | 0,00716 | NEK9      | NIMA (never in mitosis gene a)- related kinase 9                                              |
| 0,68491649  | 0,25722 | 0,841479482 | 0,04901 | NEMF      | nuclear export mediator factor                                                                |
| 0,73052189  | 0,10072 | 0,799960128 | 0,02061 | NEMF      | nuclear export mediator factor                                                                |
| 0,628942486 | 0,28713 | 0,770571108 | 0,00006 | NEMF      | nuclear export mediator factor                                                                |
| 0,840896415 | 0,45724 | 0,808320869 | 0,01551 | NEMF      | nuclear export mediator factor                                                                |
| 1,234562607 | 0,05066 | 1,178539408 | 0,00577 | NENF      | neudesin neurotrophic factor                                                                  |
| 1,059218335 | 0,47282 | 1,157490217 | 0,03186 | NENF      | neudesin neurotrophic factor                                                                  |
| 0,952637998 | 0,78394 | 1,20163605  | 0,01592 | NENF      | neudesin neurotrophic factor                                                                  |
| 1,080725402 | 0,26725 | 1,090507733 | 0,03143 | NEO1      | neogenin 1                                                                                    |
| 1,350037985 | 0,07407 | 1,576800348 | 0,00087 | NES       | nestin                                                                                        |
| 1,035982764 | 0,84518 | 0,76154437  | 0,00487 | NETO2     | neuroligin (NRP) and tollid (TLL)-like 2                                                      |
| 0,890075733 | 0,20249 | 0,787307977 | 0,0073  | NETO2     | neuroligin (NRP) and tollid (TLL)-like 2                                                      |
| 1,491744027 | 0,16952 | 1,564823563 | 0,00003 | NEU1      | sialidase 1 (lysosomal sialidase)                                                             |
| 1,050444544 | 0,59927 | 1,149494848 | 0,0059  | NEU2      | sialidase 2 (cytosolic sialidase)                                                             |
| 1,071773463 | 0,44766 | 1,160703914 | 0,03448 | NEU3      | sialidase 3 (membrane sialidase)                                                              |
| 1,383190629 | 0,08619 | 1,182631    | 0,02013 | NEURL1B   | neuronalized homolog 1B (Drosophila)                                                          |
| 0,951977908 | 0,76394 | 1,196648963 | 0,03133 | NEURL4    | neuronalized homolog 4 (Drosophila)                                                           |
| 1,138394029 | 0,23911 | 1,127400412 | 0,01535 | NEUROD4   | neurogenic differentiation 4                                                                  |
| 1,076240125 | 0,53654 | 1,316766922 | 0,00011 | NF1       | neurofibromin 1                                                                               |
| 1,060687741 | 0,62392 | 1,183451022 | 0,0081  | NF1       | neurofibromin 1                                                                               |
| 1,009751298 | 0,90714 | 0,839731493 | 0,00351 | NF2       | neurofibromin 2 (merlin)                                                                      |
| 1,039579435 | 0,738   | 0,84323111  | 0,03439 | NF2       | neurofibromin 2 (merlin)                                                                      |
| 0,640823962 | 0,15928 | 0,577142709 | 0,00009 | NFAT5     | nuclear factor of activated T-cells 5, tonicity-responsive                                    |
| 0,70759708  | 0,07748 | 0,830470024 | 0,00447 | NFAT5     | nuclear factor of activated T-cells 5, tonicity-responsive                                    |
| 1,264879542 | 0,05524 | 1,20664392  | 0,00544 | NFATC1    | nuclear factor of activated T-cells, cytoplasmic, calcineurin-dependent 1                     |
| 1,25092908  | 0,13565 | 1,230291345 | 0,00553 | NFATC1    | nuclear factor of activated T-cells, cytoplasmic, calcineurin-dependent 1                     |
| 1,049716684 | 0,64937 | 1,180992661 | 0,01121 | NFATC2    | nuclear factor of activated T-cells, cytoplasmic, calcineurin-dependent 2                     |
| 0,816203046 | 0,37215 | 0,776468875 | 0,00834 | NFATC2IP  | nuclear factor of activated T-cells, cytoplasmic, calcineurin-dependent 2 interacting protein |
| 0,85409741  | 0,36342 | 1,140763716 | 0,04012 | NFATC3    | nuclear factor of activated T-cells, cytoplasmic, calcineurin-dependent 3                     |
| 1,194163187 | 0,06635 | 1,138394029 | 0,00578 | NFATC3    | nuclear factor of activated T-cells, cytoplasmic, calcineurin-dependent 3                     |
| 1,180174343 | 0,17076 | 1,197478705 | 0,04222 | NFATC4    | nuclear factor of activated T-cells, cytoplasmic, calcineurin-dependent 4                     |
| 0,87417862  | 0,39697 | 0,787853886 | 0,00438 | NFIA      | nuclear factor I/A                                                                            |
| 0,975355462 | 0,91558 | 0,731028724 | 0,00089 | NFIA      | nuclear factor I/A                                                                            |
| 0,828170661 | 0,24441 | 0,811689581 | 0,01313 | NFIA      | nuclear factor I/A                                                                            |
| 0,987600861 | 0,88735 | 0,788946841 | 0,00023 | NFIB      | nuclear factor I/B                                                                            |
| 0,866937564 | 0,68248 | 0,694477568 | 0,01369 | NFIB      | nuclear factor I/B                                                                            |
| 0,672683604 | 0,08007 | 0,806641759 | 0,03139 | NFIC      | nuclear factor I/C (CCAAT-binding transcription factor)                                       |
| 1,089752112 | 0,60699 | 1,219255094 | 0,02733 | NFKB2     | nuclear factor of kappa light polypeptide gene enhancer in B-cells 2 (p49/p100)               |
| 0,929160674 | 0,52626 | 1,162314108 | 0,00775 | NFKBID    | nuclear factor of kappa light polypeptide gene enhancer in B-cells inhibitor, delta           |
| 1,230291345 | 0,21332 | 1,341642225 | 0,00008 | NFKBID    | nuclear factor of kappa light polypeptide gene enhancer in B-cells inhibitor, delta           |
| 0,767373048 | 0,05883 | 0,79774524  | 0,00222 | NFU1      | NFU1 iron-sulfur cluster scaffold homolog (S. cerevisiae)                                     |
| 0,969289817 | 0,87645 | 0,738669032 | 0,00065 | NFYB      | nuclear transcription factor Y, beta                                                          |
| 0,840313752 | 0,44749 | 0,790589117 | 0,01601 | NFYB      | nuclear transcription factor Y, beta                                                          |
| 0,961260928 | 0,72555 | 1,17772279  | 0,01137 | NFYC      | nuclear transcription factor Y, gamma                                                         |
| 0,917004043 | 0,39538 | 0,839149637 | 0,00862 | NFYC      | nuclear transcription factor Y, gamma                                                         |
| 0,890075733 | 0,42792 | 0,770037174 | 0,00278 | NGDN      | neuroguinidin, E1F4E binding protein                                                          |
| 0,815072332 | 0,12705 | 0,816768991 | 0,01174 | NGEF      | neuronal guanine nucleotide exchange factor                                                   |
| 0,849684999 | 0,28035 | 0,886996305 | 0,01667 | NGRN      | neugrin, neurite outgrowth associated                                                         |
| 0,8362464   | 0,52337 | 0,599569957 | 0,00002 | NHLH2     | nescient helix loop helix 2                                                                   |
| 0,949342121 | 0,81309 | 0,830470024 | 0,03115 | NHLRC2    | NHL repeat containing 2                                                                       |
| 0,936272247 | 0,73737 | 0,844400887 | 0,02622 | NHLRC3    | NHL repeat containing 3                                                                       |
| 0,684441907 | 0,18171 | 0,665725807 | 0,00024 | NHS       | Nance-Horan syndrome (congenital cataracts and dental anomalies)                              |
| 0,7944344   | 0,13669 | 0,78132788  | 0,00094 | NHS       | Nance-Horan syndrome (congenital cataracts and dental anomalies)                              |
| 0,922103118 | 0,40659 | 1,210833084 | 0,00067 | NHSL2     | NHS-like 2                                                                                    |
| 1,138394029 | 0,28062 | 1,173648178 | 0,02353 | NICN1     | nicotin 1                                                                                     |
| 0,992404375 | 0,93439 | 1,120389214 | 0,038   | NID1      | nidogen 1                                                                                     |
| 1,616641738 | 0,05607 | 1,59549048  | 0,00201 | NID1      | nidogen 1                                                                                     |
| 0,925946023 | 0,41346 | 0,865136691 | 0,02702 | NIF3L1    | NIF3 NGG1 interacting factor 3-like 1 (S. pombe)                                              |
| 0,846158597 | 0,41076 | 0,84323111  | 0,00675 | NIN       | ninein (GSK3B interacting protein)                                                            |
| 0,997922719 | 0,98857 | 1,236275261 | 0,00173 | NINJ1     | ninjurin 1                                                                                    |
| 0,984184022 | 0,91759 | 1,167158102 | 0,02832 | NINJ2     | ninjurin 2                                                                                    |
| 0,62546454  | 0,07216 | 0,573553512 | 0       | NIP7      | nuclear import 7 homolog (S. cerevisiae)                                                      |
| 0,751580739 | 0,16981 | 0,610050255 | 0       | NIP7      | nuclear import 7 homolog (S. cerevisiae)                                                      |
| 0,562919293 | 0,05809 | 0,757333158 | 0,0487  | NIPBL     | Nipped-B homolog (Drosophila)                                                                 |
| 0,837406488 | 0,48644 | 0,738157203 | 0,00207 | NIPBL     | Nipped-B homolog (Drosophila)                                                                 |
| 1,033830736 | 0,84906 | 1,176906737 | 0,01139 | NIPSNAP1  | nipsnap homolog 1 (C. elegans)                                                                |
| 0,70027816  | 0,13729 | 0,608361179 | 0,00123 | NIPSNAP3A | nipsnap homolog 3A (C. elegans)                                                               |
| 1,110338834 | 0,15686 | 1,147902414 | 0,0478  | NISCH     | nischarin                                                                                     |
| 0,945402117 | 0,70344 | 1,097331938 | 0,04162 | NIT1      | nitrilase 1                                                                                   |
| 1,032398535 | 0,62121 | 1,152686347 | 0,00877 | NKAIN4    | Na+/K+ transporting ATPase interacting 4                                                      |
| 0,86154616  | 0,33979 | 0,858565436 | 0,01986 | NKAP      | NFKB activating protein                                                                       |
| 0,924022572 | 0,59218 | 0,845572287 | 0,00442 | NKIRAS1   | NFKB inhibitor interacting Ras-like 1                                                         |
| 0,665264521 | 0,16478 | 0,739181216 | 0,0018  | NKTR      | natural killer-tumor recognition sequence                                                     |
| 0,790041312 | 0,53889 | 0,665725807 | 0,00046 | NKTR      | natural killer-tumor recognition sequence                                                     |
| 1,003471749 | 0,98102 | 0,879039561 | 0,00563 | NKTR      | natural killer-tumor recognition sequence                                                     |
| 0,988970916 | 0,97468 | 0,590496331 | 0,00104 | NKTR      | natural killer-tumor recognition sequence                                                     |
| 1,196648963 | 0,17767 | 1,28877463  | 0,00237 | NKX1-1    | NK1 homeobox 1                                                                                |
| 1,04608494  | 0,65077 | 0,862741345 | 0,02734 | NKX3-1    | NK3 homeobox 1                                                                                |
| 1,187559666 | 0,1333  | 1,297738767 | 0,00041 | NKX3-1    | NK3 homeobox 1                                                                                |
| 1,17609125  | 0,12763 | 1,181811547 | 0,0042  | NKX3-1    | NK3 homeobox 1                                                                                |
| 1,00695555  | 0,946   | 1,092777739 | 0,04002 | NKX6-3    | NK6 homeobox 3                                                                                |
| 1,095052471 | 0,3958  | 1,121166078 | 0,03998 | NLE1      | notchless homolog 1 (Drosophila)                                                              |
| 1,147902414 | 0,17638 | 1,147902414 | 0,0054  | NLGN2     | neuroligin 2                                                                                  |
| 1,088242442 | 0,64756 | 1,328685814 | 0,01991 | NLGN2     | neuroligin 2                                                                                  |
| 0,925946023 | 0,67988 | 0,853817714 | 0,0186  | NLK       | nemo-like kinase                                                                              |
| 0,892546971 | 0,1509  | 0,884540435 | 0,01499 | NLN       | neurolysin (metallopeptidase M3 family)                                                       |
| 0,90062598  | 0,31212 | 0,778624691 | 0,00003 | NLN       | neurolysin (metallopeptidase M3 family)                                                       |
| 0,720464874 | 0,07921 | 0,743806881 | 0,00016 | NLN       | neurolysin (metallopeptidase M3 family)                                                       |
| 1,143138335 | 0,32989 | 1,225185332 | 0,00032 | NLRP12    | NLR family, pyrin domain containing 12                                                        |
| 1,065846736 | 0,47878 | 1,21167266  | 0,01451 | NLRP13    | NLR family, pyrin domain containing 13                                                        |
| 1,052631155 | 0,5666  | 1,118837101 | 0,03351 | NLRP4     | NLR family, pyrin domain containing 4                                                         |
| 0,985549337 | 0,87153 | 1,159899655 | 0,01022 | NLRP5     | NLR family, pyrin domain containing 5                                                         |
| 1,176906737 | 0,23879 | 1,162314108 | 0,02106 | NMB       | neuromedin B                                                                                  |
| 0,889458994 | 0,52852 | 0,89688816  | 0,02562 | NMD3      | NMD3 homolog (S. cerevisiae)                                                                  |
| 0,708087719 | 0,07442 | 0,874784765 | 0,02791 | NME1      | non-metastatic cells 1, protein (NM23A) expressed in                                          |
| 0,808320869 | 0,0704  | 0,807201075 | 0,00409 | NMI       | N-myc (and STAT) interactor                                                                   |
| 0,860949188 | 0,13372 | 1,137605228 | 0,0328  | NMNAT2    | nicotinamide nucleotide adenyltransferase 2                                                   |
| 0,738669032 | 0,06247 | 0,670356296 | 0,00005 | NMT2      | N-myristoyltransferase 2                                                                      |
| 0,842062954 | 0,51178 | 0,76418826  | 0,02229 | NMT2      | N-myristoyltransferase 2                                                                      |
| 1,28788163  | 0,33933 | 1,666706414 | 0,00132 | NNMT      | nicotinamide N-methyltransferase                                                              |
| 0,637722196 | 0,0887  | 0,84264683  | 0,00337 | NOB1      | NIN1/RPN12 binding protein 1 homolog (S. cerevisiae)                                          |
| 0,710546022 | 0,05449 | 0,860949188 | 0,03573 | NOCL2     | nucleolar complex associated 2 homolog (S. cerevisiae)                                        |

|             |         |             |         |          |                                                                             |
|-------------|---------|-------------|---------|----------|-----------------------------------------------------------------------------|
| 0,948684315 | 0,74272 | 0,833353207 | 0,00141 | NOC3L    | nucleolar complex associated 3 homolog ( <i>S. cerevisiae</i> )             |
| 0,976708529 | 0,82045 | 1,168777249 | 0,01959 | NOD1     | nucleotide-binding oligomerization domain containing 1                      |
| 1,04608494  | 0,67044 | 1,121943481 | 0,04582 | NOD1     | nucleotide-binding oligomerization domain containing 1                      |
| 0,893785162 | 0,1767  | 0,873572896 | 0,00401 | NOL10    | nucleolar protein 10                                                        |
| 0,778085177 | 0,20418 | 0,756808396 | 0,00008 | NOL11    | nucleolar protein 11                                                        |
| 0,813943185 | 0,15304 | 0,856781955 | 0,01305 | NOL7     | nucleolar protein 7, 27kDa                                                  |
| 0,855002178 | 0,20423 | 0,897510051 | 0,04388 | NOL7     | nucleolar protein 7, 27kDa                                                  |
| 0,754190038 | 0,22227 | 0,870550563 | 0,02946 | NOL8     | nucleolar protein 8                                                         |
| 0,793883931 | 0,09979 | 0,757858283 | 0,00623 | NOM1     | nucleolar protein with MIF4G domain 1                                       |
| 0,846158597 | 0,31544 | 0,782954296 | 0,0005  | NOM1     | nucleolar protein with MIF4G domain 1                                       |
| 0,885767519 | 0,18954 | 0,846745312 | 0,00693 | NOP14    | NOP14 nucleolar protein homolog (yeast)                                     |
| 0,770571108 | 0,08811 | 0,839149637 | 0,00629 | NOP58    | NOP58 ribonucleoprotein homolog (yeast)                                     |
| 0,902500727 | 0,2215  | 0,837406488 | 0,01382 | NOS1     | nitric oxide synthase 1 (neuronal)                                          |
| 1,00486382  | 0,9699  | 1,16634937  | 0,00789 | NOS1     | nitric oxide synthase 1 (neuronal)                                          |
| 1,094293701 | 0,15729 | 1,146312186 | 0,02176 | NOS1     | nitric oxide synthase 1 (neuronal)                                          |
| 0,930449658 | 0,60412 | 1,143138335 | 0,03411 | NOSIP    | nitric oxide synthase interacting protein                                   |
| 1,22858698  | 0,0764  | 1,38991822  | 0,00006 | NOSTRIN  | nitric oxide synthase trafficker                                            |
| 0,671751713 | 0,16764 | 0,613867842 | 0       | NOV      | nephroblastoma overexpressed gene                                           |
| 1,182631    | 0,20975 | 1,146312186 | 0,0282  | NOVA1    | neuro-oncological ventral antigen 1                                         |
| 0,976708529 | 0,77356 | 0,882091365 | 0,00802 | NPAS2    | neuronal PAS domain protein 2                                               |
| 0,882091365 | 0,59161 | 0,77271055  | 0,00423 | NPAS2    | neuronal PAS domain protein 2                                               |
| 0,952637998 | 0,64437 | 1,281647924 | 0,00478 | NPAS3    | neuronal PAS domain protein 3                                               |
| 1,22010051  | 0,09171 | 1,198309021 | 0,00837 | NPB      | neuropeptide B                                                              |
| 1,189207115 | 0,09549 | 1,143138335 | 0,01332 | NPBWR2   | neuropeptides B/W receptor 2                                                |
| 0,796088099 | 0,1233  | 0,770571108 | 0,00101 | NPC1     | Niemann-Pick disease, type C1                                               |
| 0,865136691 | 0,6251  | 1,270150983 | 0,00256 | NPC2     | Niemann-Pick disease, type C2                                               |
| 0,920187651 | 0,61566 | 0,76101669  | 0,00084 | NPEPL1   | aminopeptidase-like 1                                                       |
| 0,664803554 | 0,05959 | 0,828170661 | 0,01268 | NPEPPS   | aminopeptidase puromycin sensitive                                          |
| 0,66158572  | 0,11018 | 0,712518807 | 0,01268 | NPEPPS   | aminopeptidase puromycin sensitive                                          |
| 0,91319825  | 0,33158 | 1,210833084 | 0,02235 | NPIFF    | neuropeptide FF-amide peptide precursor                                     |
| 1,174461971 | 0,1451  | 1,111108729 | 0,04697 | NPH4P    | nephronophthisis 4                                                          |
| 1,332374825 | 0,51587 | 1,366987452 | 0,0006  | NPIPL3   | nuclear pore complex interacting protein-like 3                             |
| 1,182631    | 0,27811 | 1,226884977 | 0,04817 | NPL      | N-acetylneuraminase pyruvate lyase (dihydrodipicolinate synthase)           |
| 0,777007269 | 0,16442 | 0,827023368 | 0,00137 | NPM1     | nucleophosmin (nucleolar phosphoprotein B23, numatrin)                      |
| 1,136816973 | 0,27298 | 1,187559666 | 0,00573 | NPM2     | nucleophosmin/nucleolar plasmin 2                                           |
| 1,163120042 | 0,31734 | 1,265756594 | 0,00606 | NPPA     | natriuretic peptide A                                                       |
| 1,132098902 | 0,2486  | 1,274560627 | 0,0166  | NPRL3    | nitrogen permease regulator-like 3 ( <i>S. cerevisiae</i> )                 |
| 1,143930973 | 0,10879 | 1,125058485 | 0,02412 | NR0B2    | nuclear receptor subfamily 0, group B, member 2                             |
| 0,827596816 | 0,65614 | 0,633317127 | 0,00079 | NR1D2    | nuclear receptor subfamily 1, group D, member 2                             |
| 0,575145947 | 0,053   | 0,763129604 | 0,0159  | NR1D2    | nuclear receptor subfamily 1, group D, member 2                             |
| 1,412254404 | 0,06272 | 1,375541818 | 0,00022 | NR1H3    | nuclear receptor subfamily 1, group H, member 3                             |
| 1,169587664 | 0,13326 | 1,13445485  | 0,02485 | NR1I2    | nuclear receptor subfamily 1, group I, member 2                             |
| 0,79774524  | 0,30656 | 0,785672517 | 0,01936 | NR2C1    | nuclear receptor subfamily 2, group C, member 1                             |
| 1,160703914 | 0,32409 | 0,842062954 | 0,00671 | NR2C1    | nuclear receptor subfamily 2, group C, member 1                             |
| 1,095052471 | 0,30034 | 1,185092771 | 0,0116  | NR2F1    | nuclear receptor subfamily 2, group F, member 1                             |
| 1,466116757 | 0,089   | 1,377450046 | 0,00974 | NR2F2    | nuclear receptor subfamily 2, group F, member 2                             |
| 1,143138335 | 0,11823 | 1,355664327 | 0,0133  | NR4A3    | nuclear receptor subfamily 4, group A, member 3                             |
| 1,104964485 | 0,26663 | 1,139183377 | 0,0033  | NR6A1    | nuclear receptor subfamily 6, group A, member 1                             |
| 1,070288698 | 0,5594  | 1,143138335 | 0,04362 | NR6A1    | nuclear receptor subfamily 6, group A, member 1                             |
| 1,056285625 | 0,41892 | 1,095052471 | 0,0181  | NRAP     | nebulin-related anchoring protein                                           |
| 0,798298386 | 0,10544 | 0,789493887 | 0,0103  | NRARP    | NOTCH-regulated ankyrin repeat protein                                      |
| 0,78024548  | 0,08136 | 0,811127156 | 0,00212 | NRAS     | neuroblastoma RAS viral (v-ras) oncogene homolog                            |
| 0,910038824 | 0,60195 | 0,738669032 | 0,01219 | NRBF2    | nuclear receptor binding factor 2                                           |
| 0,91383145  | 0,75986 | 0,681601304 | 0,03085 | NRBF2    | nuclear receptor binding factor 2                                           |
| 1,466116757 | 0,07947 | 1,374588696 | 0,04741 | NRCAM    | neuronal cell adhesion molecule                                             |
| 1,117287138 | 0,30774 | 1,220946513 | 0,00881 | NRF1     | nuclear respiratory factor 1                                                |
| 0,720964436 | 0,12111 | 0,711038705 | 0,00081 | NRIP1    | nuclear receptor interacting protein 1                                      |
| 0,735603373 | 0,46535 | 0,59295725  | 0,00001 | NRIP1    | nuclear receptor interacting protein 1                                      |
| 1,257884972 | 0,05696 | 1,314031627 | 0,00141 | NRIP3    | nuclear receptor interacting protein 3                                      |
| 1,095811766 | 0,31949 | 1,121166078 | 0,03246 | NRL      | neural retina leucine zipper                                                |
| 1,242288282 | 0,07025 | 1,175276328 | 0,01478 | NRP1     | neuropilin 1                                                                |
| 0,940826108 | 0,56134 | 1,216722359 | 0,01805 | NRP2     | neuropilin 2                                                                |
| 0,989656656 | 0,91894 | 1,147107024 | 0,01038 | NSAP11   | nervous system abundant protein 11                                          |
| 1,161508732 | 0,55875 | 0,792784137 | 0,00259 | NSD1     | nuclear receptor binding SET domain protein 1                               |
| 0,840896415 | 0,12614 | 0,87417862  | 0,04994 | NSFL1C   | NSFL1 (p97) cofactor (p47)                                                  |
| 0,641712949 | 0,185   | 0,819036698 | 0,00226 | NSFL1C   | NSFL1 (p97) cofactor (p47)                                                  |
| 0,927230546 | 0,61314 | 0,849684999 | 0,00445 | NSMAF    | neutral sphingomyelinase (N- <i>S</i> Mase) activation associated factor    |
| 0,716480825 | 0,17028 | 0,805524291 | 0,00632 | NSMAF    | neutral sphingomyelinase (N- <i>S</i> Mase) activation associated factor    |
| 0,788946841 | 0,10655 | 0,877213549 | 0,02009 | NSMCE2   | non-SMC element 2, MMS21 homolog ( <i>S. cerevisiae</i> )                   |
| 0,904379378 | 0,45399 | 0,885767519 | 0,0043  | NSMCE4A  | non-SMC element 4 homolog A ( <i>S. cerevisiae</i> )                        |
| 0,882091365 | 0,45563 | 0,822450069 | 0,02971 | NSMCE4A  | non-SMC element 4 homolog A ( <i>S. cerevisiae</i> )                        |
| 0,849684999 | 0,42365 | 1,135242102 | 0,04189 | NSUN5    | NOP2/Sun domain family, member 5                                            |
| 1,111108729 | 0,43631 | 1,311302014 | 0,00257 | NSUNSP1  | NOP2/Sun domain family, member 5 pseudogene 1                               |
| 1,059952783 | 0,72993 | 1,227735684 | 0,00594 | NSUNSP1  | NOP2/Sun domain family, member 5 pseudogene 1                               |
| 0,920187651 | 0,63751 | 1,230291345 | 0,00258 | NSUNSP2  | NOP2/Sun domain family, member 5 pseudogene 2                               |
| 0,771105413 | 0,14233 | 0,757333158 | 0,00033 | NTSDC1   | 5'-nucleotidase domain containing 1                                         |
| 0,824162085 | 0,30296 | 0,649319301 | 0,00001 | NTSDC1   | 5'-nucleotidase domain containing 1                                         |
| 1,002081605 | 0,97894 | 0,85797053  | 0,01199 | NTF4     | neurotrophin 4                                                              |
| 0,932386486 | 0,54734 | 1,119612889 | 0,04319 | NTN1     | netrin 1                                                                    |
| 1,262252032 | 0,15241 | 1,221793102 | 0,00804 | NTN1     | netrin 1                                                                    |
| 1,043188594 | 0,6646  | 1,140763716 | 0,00522 | NTN1     | netrin 1                                                                    |
| 0,954621014 | 0,53232 | 1,149494848 | 0,01064 | NTN5     | netrin 5                                                                    |
| 0,825305409 | 0,19924 | 0,832775771 | 0,00071 | NTPCR    | nucleoside-triphosphatase, cancer-related                                   |
| 1,185914499 | 0,08412 | 1,183451022 | 0,00584 | NTRK3    | neurotrophic tyrosine kinase, receptor, type 3                              |
| 1,156688184 | 0,12454 | 1,155886707 | 0,0085  | NTRK3    | neurotrophic tyrosine kinase, receptor, type 3                              |
| 0,937571096 | 0,79903 | 1,265756594 | 0,0231  | NUCB1    | nucleobindin 1                                                              |
| 0,804966138 | 0,2283  | 0,876605721 | 0,03772 | NUCKS1   | nuclear casein kinase and cyclin-dependent kinase substrate 1               |
| 0,754712984 | 0,23601 | 0,734584317 | 0,01431 | NUCKS1   | nuclear casein kinase and cyclin-dependent kinase substrate 1               |
| 0,59295725  | 0,05235 | 0,693515485 | 0,00143 | NUCKS1   | nuclear casein kinase and cyclin-dependent kinase substrate 1               |
| 1,126619228 | 0,16901 | 1,121943481 | 0,01015 | NUDT10   | nudix (nucleoside diphosphate linked moiety X)-type motif 10                |
| 0,982820599 | 0,92156 | 0,670356296 | 0,00082 | NUDT12   | nudix (nucleoside diphosphate linked moiety X)-type motif 12                |
| 0,845572287 | 0,24588 | 0,755236293 | 0,00193 | NUDT16   | nudix (nucleoside diphosphate linked moiety X)-type motif 16                |
| 1,111879158 | 0,18756 | 1,203303026 | 0,00766 | NUDT16   | nudix (nucleoside diphosphate linked moiety X)-type motif 16                |
| 0,882091365 | 0,17084 | 0,856781955 | 0,03466 | NUDT16L1 | nudix (nucleoside diphosphate linked moiety X)-type motif 16-like 1         |
| 1,019597683 | 0,81727 | 1,147107024 | 0,00606 | NUDT16P1 | nudix (nucleoside diphosphate linked moiety X)-type motif 16 pseudogene 1   |
| 0,921464186 | 0,63624 | 0,832198735 | 0,00152 | NUDT19   | nudix (nucleoside diphosphate linked moiety X)-type motif 19                |
| 0,783497187 | 0,21411 | 0,758383773 | 0,00819 | NUDT21   | nudix (nucleoside diphosphate linked moiety X)-type motif 21                |
| 0,946713631 | 0,79398 | 1,29056249  | 0,00158 | NUDT22   | nudix (nucleoside diphosphate linked moiety X)-type motif 22                |
| 0,789493887 | 0,25768 | 0,737134609 | 0,00046 | NUDT5    | nudix (nucleoside diphosphate linked moiety X)-type motif 5                 |
| 0,951977908 | 0,73837 | 0,823591017 | 0,02991 | NUDT7    | nudix (nucleoside diphosphate linked moiety X)-type motif 7                 |
| 0,755759964 | 0,08588 | 0,832198735 | 0,00143 | NUDT9    | nudix (nucleoside diphosphate linked moiety X)-type motif 9                 |
| 0,817902059 | 0,26653 | 0,684441907 | 0,00112 | NUF2     | NUF2, NDC80 kinetochore complex component, homolog ( <i>S. cerevisiae</i> ) |
| 0,865136691 | 0,25507 | 0,802737389 | 0,0081  | NUFIP1   | nuclear fragile X mental retardation protein interacting protein 1          |
| 0,907519155 | 0,50673 | 0,724471077 | 0,00007 | NUFIP1   | nuclear fragile X mental retardation protein interacting protein 1          |

|             |         |             |         |            |                                                                                                                          |
|-------------|---------|-------------|---------|------------|--------------------------------------------------------------------------------------------------------------------------|
| 1,038859103 | 0,78898 | 0,859756486 | 0,00607 | NUFIP1     | nuclear fragile X mental retardation protein interacting protein 1                                                       |
| 0,990342872 | 0,96144 | 0,828170661 | 0,02589 | NUFIP2     | nuclear fragile X mental retardation protein interacting protein 2                                                       |
| 0,763658749 | 0,06358 | 0,786217292 | 0,00107 | NUFIP2     | nuclear fragile X mental retardation protein interacting protein 2                                                       |
| 0,881480158 | 0,3362  | 0,821880187 | 0,02413 | NUFIP2     | nuclear fragile X mental retardation protein interacting protein 2                                                       |
| 0,834509281 | 0,20279 | 0,770571108 | 0,00159 | NUMA1      | nuclear mitotic apparatus protein 1                                                                                      |
| 1,159095952 | 0,39399 | 0,804408371 | 0,01952 | NUMB       | numb homolog (Drosophila)                                                                                                |
| 0,863938187 | 0,13618 | 0,843815796 | 0,04041 | NUMBL      | numb homolog (Drosophila)-like                                                                                           |
| 0,835666959 | 0,4398  | 0,800514811 | 0,00197 | NUP107     | nucleoporin 107kDa                                                                                                       |
| 0,707106781 | 0,07305 | 0,826450318 | 0,00797 | NUP133     | nucleoporin 133kDa                                                                                                       |
| 0,758383773 | 0,23268 | 0,691595315 | 0,00034 | NUP153     | nucleoporin 153kDa                                                                                                       |
| 0,820741609 | 0,23167 | 0,725476104 | 0,00035 | NUP153     | nucleoporin 153kDa                                                                                                       |
| 0,726482525 | 0,05536 | 0,760489377 | 0,00444 | NUP155     | nucleoporin 155kDa                                                                                                       |
| 0,853226098 | 0,50459 | 0,768437591 | 0,01861 | NUP160     | nucleoporin 160kDa                                                                                                       |
| 0,831045862 | 0,22005 | 0,836826243 | 0,04951 | NUP205     | nucleoporin 205kDa                                                                                                       |
| 0,898755127 | 0,09172 | 0,862143545 | 0,01474 | NUP205     | nucleoporin 205kDa                                                                                                       |
| 1,35754498  | 0,12661 | 1,497960934 | 0,00002 | NUP210     | nucleoporin 210kDa                                                                                                       |
| 0,84264683  | 0,11683 | 0,887611337 | 0,02441 | NUP37      | nucleoporin 37kDa                                                                                                        |
| 0,934975198 | 0,54601 | 0,904379378 | 0,00735 | NUP54      | nucleoporin 54kDa                                                                                                        |
| 0,765248385 | 0,16574 | 0,788400174 | 0,00165 | NUP54      | nucleoporin 54kDa                                                                                                        |
| 1,162314108 | 0,14459 | 0,816768891 | 0,01756 | NUP88      | nucleoporin 88kDa                                                                                                        |
| 0,872967591 | 0,29478 | 0,857376037 | 0,01236 | NUP98      | nucleoporin 98kDa                                                                                                        |
| 0,780786493 | 0,23428 | 0,781869643 | 0,00668 | NUP98      | nucleoporin 98kDa                                                                                                        |
| 0,910038824 | 0,65302 | 0,760489377 | 0,00028 | NUPL1      | nucleoporin like 1                                                                                                       |
| 0,646176415 | 0,0736  | 0,542238704 | 0,00005 | NUPL1      | nucleoporin like 1                                                                                                       |
| 1,22858698  | 0,52678 | 0,735603373 | 0,00053 | NUPL1      | nucleoporin like 1                                                                                                       |
| 0,946057647 | 0,48361 | 1,170398641 | 0,02439 | NXF2       | nuclear RNA export factor 2                                                                                              |
| 1,237990291 | 0,11894 | 1,127400412 | 0,04856 | NXF3       | nuclear RNA export factor 3                                                                                              |
| 1,120389214 | 0,16389 | 1,260503392 | 0,00121 | NXP3       | neurexophilin 3                                                                                                          |
| 0,71946679  | 0,22663 | 0,70222438  | 0,00001 | NXT2       | nuclear transport factor 2-like export factor 2                                                                          |
| 1,350974085 | 0,07278 | 1,294145654 | 0,03205 | OAF        | OAF homolog (Drosophila)                                                                                                 |
| 0,737645729 | 0,18752 | 0,822450069 | 0,038   | OAS3       | 2'-5'-oligoadenylate synthetase 3, 100kDa                                                                                |
| 0,792784137 | 0,44758 | 1,118061851 | 0,02031 | OAZ1       | ornithine decarboxylase antizyme 1                                                                                       |
| 0,905006463 | 0,68207 | 1,203303026 | 0,0197  | OAZ2       | ornithine decarboxylase antizyme 2                                                                                       |
| 1,139973273 | 0,35137 | 1,136029265 | 0,01461 | OAZ2       | ornithine decarboxylase antizyme 2                                                                                       |
| 0,60332196  | 0,06182 | 0,833931044 | 0,02147 | OBFC1      | oligonucleotide/oligosaccharide-binding fold containing 1                                                                |
| 0,888226796 | 0,19393 | 0,895025071 | 0,01581 | OCIA2      | OCIA domain containing 2                                                                                                 |
| 0,763658749 | 0,26432 | 0,694477568 | 0,00035 | OCLN       | occludin                                                                                                                 |
| 0,991029563 | 0,92087 | 1,121943481 | 0,0228  | OCM2       | oncomodulin 2                                                                                                            |
| 1,787570325 | 0,25953 | 2,391639594 | 0,0003  | ODAM       | odontogenic, ameloblast associated                                                                                       |
| 0,998614666 | 0,987   | 1,135242102 | 0,04606 | ODF1       | outer dense fiber of sperm tails 1                                                                                       |
| 0,857376037 | 0,34954 | 0,814507563 | 0,01174 | ODF2L      | outer dense fiber of sperm tails 2-like                                                                                  |
| 1,082975046 | 0,75441 | 1,330529041 | 0,00288 | ODF3B      | outer dense fiber of sperm tails 3B                                                                                      |
| 1,070288698 | 0,49194 | 1,184271612 | 0,03122 | ODF3L2     | outer dense fiber of sperm tails 3-like 2                                                                                |
| 1,089752112 | 0,2876  | 1,172022284 | 0,00966 | OFCC1      | orofacial cleft 1 candidate 1                                                                                            |
| 1,0181852   | 0,76967 | 1,086734863 | 0,0148  | OFCC1      | orofacial cleft 1 candidate 1                                                                                            |
| 1,070288698 | 0,79497 | 0,742261785 | 0,00721 | OFD1       | oral-facial-digital syndrome 1                                                                                           |
| 0,781869643 | 0,09096 | 0,816203046 | 0,00138 | OGFOD1     | 2-oxoglutarate and iron-dependent oxygenase domain containing 1                                                          |
| 1,160703914 | 0,14682 | 1,165541198 | 0,03437 | OGFOD2     | 2-oxoglutarate and iron-dependent oxygenase domain containing 2                                                          |
| 1,095811766 | 0,4987  | 1,216722359 | 0,00036 | OGFOD2     | 2-oxoglutarate and iron-dependent oxygenase domain containing 2                                                          |
| 0,948684315 | 0,70303 | 0,823591017 | 0,00313 | OGFRL1     | opioid growth factor receptor-like 1                                                                                     |
| 0,666187413 | 0,09005 | 0,688725023 | 0,00002 | OGFRL1     | opioid growth factor receptor-like 1                                                                                     |
| 1,02313747  | 0,88498 | 1,247465572 | 0,03349 | OGT        | O-linked N-acetylglucosamine (GlcNAc) transferase (UDP-N-acetylglucosamine:polypeptide-N-acetylglucosaminyl transferase) |
| 1,029540083 | 0,8503  | 1,268391399 | 0,02291 | OGT        | O-linked N-acetylglucosamine (GlcNAc) transferase (UDP-N-acetylglucosamine:polypeptide-N-acetylglucosaminyl transferase) |
| 0,859160755 | 0,29228 | 0,750539549 | 0,00019 | OIP5       | Opa interacting protein 5                                                                                                |
| 1,184271612 | 0,07341 | 1,185914499 | 0,0082  | OK/SW-CL36 | OK/SW-CL36                                                                                                               |
| 0,740206649 | 0,10595 | 0,852044095 | 0,01133 | OLA1       | Obg-like ATPase 1                                                                                                        |
| 1,004167543 | 0,96587 | 0,859160755 | 0,00535 | OLA1       | Obg-like ATPase 1                                                                                                        |
| 0,936272247 | 0,57045 | 1,146312186 | 0,03606 | OLFM1      | olfactomedin 1                                                                                                           |
| 1,199971382 | 0,37121 | 1,500038989 | 0,00292 | OLFML3     | olfactomedin-like 3                                                                                                      |
| 1,156688184 | 0,15104 | 1,184271612 | 0,01557 | ONECUT2    | one cut homeobox 2                                                                                                       |
| 0,905633983 | 0,75041 | 0,738669032 | 0,00082 | OPA1       | optic atrophy 1 (autosomal dominant)                                                                                     |
| 1,07997656  | 0,57328 | 0,79940583  | 0,00251 | OPA1       | optic atrophy 1 (autosomal dominant)                                                                                     |
| 1,174461971 | 0,11497 | 1,212512819 | 0,00494 | OPN4       | opsin 4                                                                                                                  |
| 1,101141598 | 0,30674 | 1,116512962 | 0,01331 | OPN5       | opsin 5                                                                                                                  |
| 1,114193651 | 0,24207 | 1,155085785 | 0,04441 | OPRL1      | opiate receptor-like 1                                                                                                   |
| 1,061423209 | 0,52329 | 1,168777249 | 0,01604 | OR10D1P    | olfactory receptor, family 10, subfamily D, member 1 pseudogene                                                          |
| 0,976708529 | 0,77365 | 1,152686347 | 0,04398 | OR13C4     | olfactory receptor, family 13, subfamily C, member 4                                                                     |
| 1,041743429 | 0,73026 | 1,249196126 | 0,00111 | OR1D2      | olfactory receptor, family 1, subfamily D, member 2                                                                      |
| 1,074749173 | 0,43638 | 1,224336392 | 0,00324 | OR1I1      | olfactory receptor, family 1, subfamily I, member 1                                                                      |
| 1,263127262 | 0,0609  | 1,237132479 | 0,00051 | OR2H1      | olfactory receptor, family 2, subfamily H, member 1                                                                      |
| 0,981459064 | 0,83149 | 1,141554707 | 0,0451  | OR2S2      | olfactory receptor, family 2, subfamily S, member 2                                                                      |
| 1,061423209 | 0,53192 | 1,23370717  | 0,00265 | OR4D2      | olfactory receptor, family 4, subfamily D, member 2                                                                      |
| 1,0238469   | 0,8607  | 1,118061851 | 0,03017 | OR51B4     | olfactory receptor, family 51, subfamily B, member 4                                                                     |
| 1,185914499 | 0,08299 | 1,143930973 | 0,00494 | OR51B5     | olfactory receptor, family 51, subfamily B, member 5                                                                     |
| 1,094293701 | 0,45331 | 1,108800644 | 0,01748 | OR51E2     | olfactory receptor, family 51, subfamily E, member 2                                                                     |
| 1,244874235 | 0,06183 | 1,185092771 | 0,00556 | OR51I1     | olfactory receptor, family 51, subfamily I, member 1                                                                     |
| 1,122721422 | 0,2985  | 1,267512522 | 0,00007 | OR51J2     | olfactory receptor, family 51, subfamily J, member 2                                                                     |
| 1,147107024 | 0,30449 | 1,130530567 | 0,02125 | OR51M1     | olfactory receptor, family 51, subfamily M, member 1                                                                     |
| 1,105730653 | 0,20329 | 1,142346247 | 0,00537 | OR52A1     | olfactory receptor, family 52, subfamily A, member 1                                                                     |
| 1,101141598 | 0,24663 | 1,127400412 | 0,01921 | OR52K3P    | olfactory receptor, family 52, subfamily K, member 3 pseudogene                                                          |
| 1,07997656  | 0,35593 | 1,151089491 | 0,01524 | OR5V1      | olfactory receptor, family 5, subfamily V, member 1                                                                      |
| 1,118061851 | 0,18502 | 1,127400412 | 0,01985 | OR6W1P     | olfactory receptor, family 6, subfamily W, member 1 pseudogene                                                           |
| 1,092777739 | 0,37407 | 1,29056249  | 0,00077 | OR7A5      | olfactory receptor, family 7, subfamily A, member 5                                                                      |
| 0,995849753 | 0,96235 | 1,116512962 | 0,01297 | OR7C1      | olfactory receptor, family 7, subfamily C, member 1                                                                      |
| 1,027401439 | 0,71647 | 0,858565436 | 0,02482 | OR7D2      | olfactory receptor, family 7, subfamily D, member 2                                                                      |
| 1,10343374  | 0,35758 | 1,185092771 | 0,01256 | OR7E156P   | olfactory receptor, family 7, subfamily E, member 156 pseudogene                                                         |
| 1,158292806 | 0,40824 | 1,22858698  | 0,01196 | ORAI2      | ORAI calcium release-activated calcium modulator 2                                                                       |
| 1,169587664 | 0,23573 | 1,199139914 | 0,00188 | ORAI2      | ORAI calcium release-activated calcium modulator 2                                                                       |
| 0,817335328 | 0,08236 | 0,867538687 | 0,00375 | ORAOV1     | oral cancer overexpressed 1                                                                                              |
| 0,840313752 | 0,15594 | 0,840896415 | 0,00495 | ORC2       | origin recognition complex, subunit 2                                                                                    |
| 0,946713631 | 0,75624 | 0,772175133 | 0,00057 | ORC2       | origin recognition complex, subunit 2                                                                                    |
| 0,899378312 | 0,40279 | 0,815637493 | 0,00979 | ORC3       | origin recognition complex, subunit 3                                                                                    |
| 0,819604608 | 0,31952 | 0,821310701 | 0,00589 | ORC4       | origin recognition complex, subunit 4                                                                                    |
| 0,8362464   | 0,31123 | 0,880259014 | 0,01719 | ORC5       | origin recognition complex, subunit 5                                                                                    |
| 1,264003098 | 0,18474 | 1,138394029 | 0,0062  | ORMDL3     | ORM1-like 3 (S. cerevisiae)                                                                                              |
| 1,025267238 | 0,86252 | 1,202469249 | 0,00589 | OS9        | osteosarcoma amplified 9, endoplasmic reticulum lectin                                                                   |
| 1,001387256 | 0,99569 | 1,319507911 | 0,00013 | OS9        | osteosarcoma amplified 9, endoplasmic reticulum lectin                                                                   |
| 1,138394029 | 0,12022 | 1,178539408 | 0,01982 | OSBPL10    | oxysterol binding protein-like 10                                                                                        |
| 0,826450318 | 0,4071  | 0,774319028 | 0,02679 | OSBPL11    | oxysterol binding protein-like 11                                                                                        |
| 0,856188285 | 0,4179  | 0,771105413 | 0,00119 | OSBPL11    | oxysterol binding protein-like 11                                                                                        |
| 1,058484395 | 0,57239 | 1,143138335 | 0,00764 | OSBPL1A    | oxysterol binding protein-like 1A                                                                                        |
| 0,813943185 | 0,16145 | 0,862741345 | 0,02871 | OSBPL5     | oxysterol binding protein-like 5                                                                                         |
| 1,128964405 | 0,19342 | 1,230291345 | 0,01479 | OSBPL7     | oxysterol binding protein-like 7                                                                                         |
| 0,963929808 | 0,9171  | 0,774855931 | 0,00315 | OSBPL8     | oxysterol binding protein-like 8                                                                                         |

|             |         |             |         |          |                                                                                                      |
|-------------|---------|-------------|---------|----------|------------------------------------------------------------------------------------------------------|
| 0,787307977 | 0,2537  | 0,738157203 | 0,00046 | OSBPL8   | oxysterol binding protein-like 8                                                                     |
| 0,735603373 | 0,13961 | 0,733566672 | 0,00055 | OSBPL8   | oxysterol binding protein-like 8                                                                     |
| 0,958599438 | 0,65086 | 0,879039561 | 0,01359 | OSTAlpha | organic solute transporter alpha                                                                     |
| 0,816203046 | 0,06163 | 0,859756486 | 0,02856 | OSTF1    | osteoclast stimulating factor 1                                                                      |
| 1,145517898 | 0,16229 | 1,136029265 | 0,01606 | OTC      | ornithine carbamoyltransferase                                                                       |
| 1,077733145 | 0,3954  | 1,113421618 | 0,00933 | OTOF     | otoferlin                                                                                            |
| 1,122721422 | 0,26484 | 1,279872414 | 0,00043 | OTUB2    | OTU domain, ubiquitin aldehyde binding 2                                                             |
| 0,880869374 | 0,44895 | 0,864537231 | 0,04291 | OTUD1    | OTU domain containing 1                                                                              |
| 0,853226098 | 0,51677 | 0,76418826  | 0,00343 | OTUD1    | OTU domain containing 1                                                                              |
| 0,776468875 | 0,12131 | 0,798851916 | 0,00001 | OTUD4    | OTU domain containing 4                                                                              |
| 1,067325338 | 0,64751 | 1,182631    | 0,00655 | OTUD5    | OTU domain containing 5                                                                              |
| 1,140763716 | 0,34051 | 1,243149669 | 0,00229 | OTUD5    | OTU domain containing 5                                                                              |
| 0,810003474 | 0,3852  | 0,658383461 | 0,00014 | OTUD6B   | OTU domain containing 6B                                                                             |
| 1,121943481 | 0,22478 | 1,195819797 | 0,00412 | OTUD7B   | OTU domain containing 7B                                                                             |
| 0,946057647 | 0,5229  | 0,828744904 | 0,00303 | OVOL2    | ovo-like 2 (Drosophila)                                                                              |
| 0,773246337 | 0,3595  | 1,114966219 | 0,01165 | OXA1L    | oxidase (cytochrome c) assembly 1-like                                                               |
| 1,154285418 | 0,23761 | 1,148698355 | 0,03066 | OXCT2    | 3-oxoacid CoA transferase 2                                                                          |
| 0,914465089 | 0,38912 | 0,87539133  | 0,02545 | OXGR1    | oxoglutarate (alpha-ketoglutarate) receptor 1                                                        |
| 0,936272247 | 0,86671 | 0,656560563 | 0,0006  | OXR1     | oxidation resistance 1                                                                               |
| 0,838568184 | 0,41824 | 0,702222438 | 0,02682 | OXR1     | oxidation resistance 1                                                                               |
| 1,002776436 | 0,98133 | 0,873572896 | 0,01211 | OXSM     | 3-oxoacyl-ACP synthase, mitochondrial                                                                |
| 1,23370717  | 0,05067 | 1,143930973 | 0,01917 | P2RX2    | purinergic receptor P2X, ligand-gated ion channel, 2                                                 |
| 1,041021598 | 0,65546 | 1,16634937  | 0,00999 | P2RX2    | purinergic receptor P2X, ligand-gated ion channel, 2                                                 |
| 0,750539549 | 0,09798 | 0,680657058 | 0,00347 | P2RY1    | purinergic receptor P2Y, G-protein coupled, 1                                                        |
| 0,699792933 | 0,11428 | 0,79774524  | 0,00094 | P2RY2    | purinergic receptor P2Y, G-protein coupled, 2                                                        |
| 1,030968319 | 0,78175 | 1,255271991 | 0,00017 | P2RY4    | pyrimidinergic receptor P2Y, G-protein coupled, 4                                                    |
| 1,383190629 | 0,17215 | 1,198309021 | 0,04722 | P4HA1    | prolyl 4-hydroxylase, alpha polypeptide I                                                            |
| 1,002776436 | 0,96373 | 0,922103118 | 0,02392 | P4HA1    | prolyl 4-hydroxylase, alpha polypeptide I                                                            |
| 1,002776436 | 0,97555 | 1,16634937  | 0,0092  | P4HA2    | prolyl 4-hydroxylase, alpha polypeptide II                                                           |
| 1,282536603 | 0,09722 | 1,286989247 | 0,00153 | P4HTM    | prolyl 4-hydroxylase, transmembrane (endoplasmic reticulum)                                          |
| 1,063632673 | 0,70546 | 1,197478705 | 0,02082 | PABPC1L  | poly(A) binding protein, cytoplasmic 1-like                                                          |
| 0,86934456  | 0,4688  | 0,680657058 | 0,00004 | PACRGL   | PARK2 co-regulated-like                                                                              |
| 0,984866443 | 0,88973 | 1,218410264 | 0,0311  | PACS1    | phosphofurin acidic cluster sorting protein 1                                                        |
| 1,085981856 | 0,60276 | 1,303147149 | 0,00301 | PACS2    | phosphofurin acidic cluster sorting protein 2                                                        |
| 1,0453601   | 0,65595 | 1,227735684 | 0,00435 | PACS2    | phosphofurin acidic cluster sorting protein 2                                                        |
| 1,034547582 | 0,82844 | 1,17772279  | 0,01701 | PACS2    | phosphofurin acidic cluster sorting protein 2                                                        |
| 1,000693387 | 0,99701 | 1,131314463 | 0,01524 | PACSN2   | protein kinase C and casein kinase substrate in neurons 2                                            |
| 1,531557997 | 0,12473 | 1,900000766 | 0,00515 | PADI1    | peptidyl arginine deiminase, type I                                                                  |
| 1,126619228 | 0,16185 | 1,151887642 | 0,01952 | PADI2    | peptidyl arginine deiminase, type II                                                                 |
| 1,01395948  | 0,86382 | 1,246601194 | 0,00063 | PAEP     | progesterone-associated endometrial protein                                                          |
| 1,264003098 | 0,05784 | 1,246601194 | 0,01989 | PAG1     | phosphoprotein associated with glycosphingolipid microdomains 1                                      |
| 0,790589117 | 0,08145 | 0,782954296 | 0,00157 | PAICS    | phosphoribosylaminoimidazole carboxylase, phosphoribosylaminoimidazole succinocarboxamide synthetase |
| 1,02313747  | 0,80396 | 0,898132373 | 0,04387 | PAICS    | phosphoribosylaminoimidazole carboxylase, phosphoribosylaminoimidazole succinocarboxamide synthetase |
| 0,781869643 | 0,34671 | 0,685391402 | 0,00001 | PAIP1    | poly(A) binding protein interacting protein 1                                                        |
| 0,72597914  | 0,09278 | 0,824162085 | 0,00429 | PAIP1    | poly(A) binding protein interacting protein 1                                                        |
| 0,811127156 | 0,34331 | 0,704172113 | 0,00009 | PAIP1    | poly(A) binding protein interacting protein 1                                                        |
| 0,717972255 | 0,08576 | 0,802737389 | 0,01082 | PAIP1    | poly(A) binding protein interacting protein 1                                                        |
| 0,824733549 | 0,21755 | 0,692074858 | 0,00003 | PAIP1    | poly(A) binding protein interacting protein 1                                                        |
| 0,709070018 | 0,11086 | 0,771105413 | 0,00625 | PAIP2    | poly(A) binding protein interacting protein 2                                                        |
| 0,83353207  | 0,13999 | 0,817335328 | 0,00122 | PAIP2    | poly(A) binding protein interacting protein 2                                                        |
| 1,089752112 | 0,21877 | 1,163120042 | 0,00083 | PAK1     | p21 protein (Cdc42/Rac)-activated kinase 1                                                           |
| 1,058484395 | 0,71771 | 0,864537231 | 0,00988 | PAK2     | p21 protein (Cdc42/Rac)-activated kinase 2                                                           |
| 0,842062954 | 0,34514 | 0,825877665 | 0,0036  | PALLD    | palladin, cytoskeletal associated protein                                                            |
| 0,803850991 | 0,4031  | 0,78024548  | 0,00094 | PALLD    | palladin, cytoskeletal associated protein                                                            |
| 1,080725402 | 0,36808 | 0,853226098 | 0,02191 | PALMD    | palmdelphin                                                                                          |
| 1,141554707 | 0,13559 | 1,231144413 | 0,02226 | PANR1    | peptidase domain containing associated with muscle regeneration 1                                    |
| 0,818469182 | 0,35731 | 0,863339559 | 0,01545 | PAN3     | PAN3 poly(A) specific ribonuclease subunit homolog (S. cerevisiae)                                   |
| 0,636397468 | 0,12619 | 0,635075491 | 0,00102 | PANK1    | pantothenate kinase 1                                                                                |
| 0,827596816 | 0,26903 | 0,877213549 | 0,02078 | PANK2    | pantothenate kinase 2                                                                                |
| 0,858565436 | 0,27296 | 0,833931044 | 0,00664 | PANK2    | pantothenate kinase 2                                                                                |
| 1,250062303 | 0,21678 | 0,772175133 | 0,03005 | PANK2    | pantothenate kinase 2                                                                                |
| 1,188383105 | 0,07084 | 1,196648963 | 0,00926 | PANX2    | pannexin 2                                                                                           |
| 0,84264683  | 0,48733 | 0,720964436 | 0,00211 | PAPD4    | PAP associated domain containing 4                                                                   |
| 0,976708529 | 0,91597 | 0,832198735 | 0,00821 | PAPD5    | PAP associated domain containing 5                                                                   |
| 0,777007269 | 0,07022 | 0,876605721 | 0,00318 | PAPD7    | PAP associated domain containing 7                                                                   |
| 0,772175133 | 0,1207  | 0,732042848 | 0,00054 | PAPOLA   | poly(A) polymerase alpha                                                                             |
| 0,670356296 | 0,06325 | 0,675955417 | 0,00005 | PAPOLA   | poly(A) polymerase alpha                                                                             |
| 1,059218335 | 0,60374 | 1,193335743 | 0,00562 | PAPOLG   | poly(A) polymerase gamma                                                                             |
| 0,792234811 | 0,37508 | 0,644834125 | 0,00009 | PAPOLG   | poly(A) polymerase gamma                                                                             |
| 1,081474763 | 0,49033 | 1,302244419 | 0,01198 | PAPOLG   | poly(A) polymerase gamma                                                                             |
| 1,197478705 | 0,05839 | 1,191682575 | 0,0384  | PAPPA    | pregnancy-associated plasma protein A, pappalysin 1                                                  |
| 1,066585781 | 0,55565 | 1,190856849 | 0,02288 | PAPPA    | pregnancy-associated plasma protein A, pappalysin 1                                                  |
| 1,144724161 | 0,09826 | 1,219255094 | 0,00484 | PAPPA2   | pappalysin 2                                                                                         |
| 0,671286251 | 0,14363 | 0,562139462 | 0,00004 | PAQR3    | progesterin and adiponQ receptor family member III                                                   |
| 0,808881348 | 0,05738 | 0,804966138 | 0,00172 | PARD3    | par-3 partitioning defective 3 homolog (C. elegans)                                                  |
| 1,124278924 | 0,211   | 1,210833084 | 0,00017 | PARD3B   | par-3 partitioning defective 3 homolog B (C. elegans)                                                |
| 0,724471077 | 0,05057 | 0,781869643 | 0,00096 | PARD3B   | par-3 partitioning defective 3 homolog B (C. elegans)                                                |
| 0,869947353 | 0,64274 | 0,76684133  | 0,01507 | PARD6B   | par-6 partitioning defective 6 homolog beta (C. elegans)                                             |
| 1,108800644 | 0,35472 | 1,111108729 | 0,03656 | PARP1    | poly (ADP-ribose) polymerase 1                                                                       |
| 1,032398535 | 0,64785 | 1,132098902 | 0,0076  | PARP10   | poly (ADP-ribose) polymerase family, member 10                                                       |
| 1,130530567 | 0,19848 | 1,194163187 | 0,00528 | PARP16   | poly (ADP-ribose) polymerase family, member 16                                                       |
| 0,919550046 | 0,41461 | 1,10343374  | 0,03206 | PARP2    | poly (ADP-ribose) polymerase 2                                                                       |
| 0,955945318 | 0,65004 | 1,137605228 | 0,02556 | PART1    | prostate androgen-regulated transcript 1 (non-protein coding)                                        |
| 1,07549439  | 0,50597 | 1,112650121 | 0,03079 | PARVA    | parvin, alpha                                                                                        |
| 1,108800644 | 0,53426 | 1,156688184 | 0,01822 | PARVA    | parvin, alpha                                                                                        |
| 1,159899655 | 0,09139 | 1,155085785 | 0,0095  | PARVB    | parvin, beta                                                                                         |
| 1,232852325 | 0,11617 | 1,344434994 | 0,00277 | PARVB    | parvin, beta                                                                                         |
| 0,888842681 | 0,27998 | 0,841479482 | 0,02766 | PATE1    | prostate and testis expressed 1                                                                      |
| 0,928516852 | 0,53705 | 0,854409741 | 0,00849 | PATL1    | protein associated with topoisomerase II homolog 1 (yeast)                                           |
| 1,068805991 | 0,58329 | 1,181811547 | 0,00156 | PATL2    | protein associated with topoisomerase II homolog 2 (yeast)                                           |
| 1,230291345 | 0,05519 | 1,172834949 | 0,01952 | PATZ1    | POZ (BTB) and AT hook containing zinc finger 1                                                       |
| 1,088242442 | 0,36284 | 1,136816973 | 0,03618 | PATZ1    | POZ (BTB) and AT hook containing zinc finger 1                                                       |
| 0,715984371 | 0,14155 | 0,695440986 | 0,01414 | PAWR     | PRK, apoptosis, WT1, regulator                                                                       |
| 1,092777739 | 0,52517 | 1,161508732 | 0,00415 | PAX1     | paired box 1                                                                                         |
| 0,85797053  | 0,09594 | 0,771640088 | 0,01486 | PAX3     | paired box 3                                                                                         |
| 1,048262476 | 0,54903 | 1,095811766 | 0,03248 | PAX4     | paired box 4                                                                                         |
| 1,126619228 | 0,21955 | 1,094293701 | 0,04024 | PAX7     | paired box 7                                                                                         |
| 1,152686347 | 0,06193 | 1,129747215 | 0,0271  | PAX7     | paired box 7                                                                                         |
| 1,109569472 | 0,38746 | 1,128964405 | 0,01775 | PAX8     | paired box 8                                                                                         |
| 0,757333158 | 0,17029 | 0,748461493 | 0,01155 | PBK      | PDZ binding kinase                                                                                   |
| 1,172022284 | 0,08428 | 1,151089491 | 0,03506 | PBOV1    | prostate and breast cancer overexpressed 1                                                           |
| 0,744838732 | 0,10728 | 0,831045862 | 0,00373 | PBRM1    | polybromo 1                                                                                          |
| 1,267512522 | 0,06941 | 1,200803427 | 0,03153 | PBX2     | pre-B-cell leukemia homeobox 2                                                                       |
| 1,128182137 | 0,28883 | 1,167967395 | 0,00258 | PBX4     | pre-B-cell leukemia homeobox 4                                                                       |

|             |         |             |         |          |                                                                                                              |
|-------------|---------|-------------|---------|----------|--------------------------------------------------------------------------------------------------------------|
| 1,158292806 | 0,43516 | 1,616641738 | 0       | PBXIP1   | pre-B-cell leukemia homeobox interacting protein 1                                                           |
| 1,258757174 | 0,17349 | 1,465100875 | 0,00006 | PBXIP1   | pre-B-cell leukemia homeobox interacting protein 1                                                           |
| 1,190031696 | 0,05335 | 1,226884977 | 0,03273 | PBXIP1   | pre-B-cell leukemia homeobox interacting protein 1                                                           |
| 1,093535457 | 0,51321 | 1,225185332 | 0,02552 | PC       | pyruvate carboxylase                                                                                         |
| 0,906261938 | 0,65584 | 0,775930854 | 0,00104 | PCBD2    | pterin-4 alpha-carbinolamine dehydratase/dimerization cofactor of hepatocyte nuclear factor 1 alpha (TCF1) 2 |
| 0,931740429 | 0,8371  | 0,730016005 | 0,0021  | PCBP2    | poly(rC) binding protein 2                                                                                   |
| 0,958599438 | 0,83216 | 0,823020345 | 0,02968 | PCBP2    | poly(rC) binding protein 2                                                                                   |
| 0,738669032 | 0,13278 | 0,733566672 | 0,00039 | PCBP2    | poly(rC) binding protein 2                                                                                   |
| 1,231144413 | 0,06474 | 1,172834949 | 0,03998 | PCBP3    | poly(rC) binding protein 3                                                                                   |
| 0,901250463 | 0,36358 | 0,817902059 | 0,02699 | PCDH1    | protocadherin 1                                                                                              |
| 1,245737416 | 0,0986  | 1,215036792 | 0,00683 | PCDH12   | protocadherin 12                                                                                             |
| 1,339783602 | 0,20272 | 1,248330549 | 0,02484 | PCDH18   | protocadherin 18                                                                                             |
| 0,730522189 | 0,14305 | 0,734584317 | 0,00199 | PCDH7    | protocadherin 7                                                                                              |
| 1,162314108 | 0,12592 | 1,157490217 | 0,02531 | PCDH81   | protocadherin beta 1                                                                                         |
| 0,751580739 | 0,33381 | 0,641268301 | 0,00002 | PCDH814  | protocadherin beta 14                                                                                        |
| 1,092777739 | 0,2978  | 1,136029265 | 0,04616 | PCDH86   | protocadherin beta 6                                                                                         |
| 1,138394029 | 0,1573  | 1,154285418 | 0,01544 | PCDHGA1  | protocadherin gamma subfamily A, 1                                                                           |
| 1,148698355 | 0,14714 | 1,121943481 | 0,02848 | PCDHGA9  | protocadherin gamma subfamily A, 9                                                                           |
| 1,125838586 | 0,2805  | 1,159899655 | 0,01724 | PCDP1    | primary ciliary dyskinesia protein 1                                                                         |
| 0,758909626 | 0,18915 | 0,657015814 | 0,00001 | PCF11    | PCF11, cleavage and polyadenylation factor subunit, homolog (S. cerevisiae)                                  |
| 1,109569472 | 0,49488 | 1,188383105 | 0,02054 | PCGF2    | polycomb group ring finger 2                                                                                 |
| 1,162314108 | 0,12195 | 1,16634937  | 0,02113 | PCGF2    | polycomb group ring finger 2                                                                                 |
| 1,07997656  | 0,42566 | 0,804966138 | 0,01251 | PCGF6    | polycomb group ring finger 6                                                                                 |
| 0,899378312 | 0,34079 | 0,789493887 | 0,00914 | PCL0     | piccolo (presynaptic cytomatrix protein)                                                                     |
| 0,995159722 | 0,98275 | 0,823591017 | 0,04598 | PCL0     | piccolo (presynaptic cytomatrix protein)                                                                     |
| 0,829894586 | 0,1423  | 0,805524291 | 0,00123 | PCM1     | pericentriolar material 1                                                                                    |
| 1,055537318 | 0,42332 | 1,205807828 | 0,00225 | PCM1     | pericentriolar material 1                                                                                    |
| 0,808881348 | 0,1626  | 0,890692901 | 0,04674 | PCM1     | pericentriolar material 1                                                                                    |
| 0,667111585 | 0,05686 | 0,773782497 | 0,00088 | PCM1     | pericentriolar material 1                                                                                    |
| 0,932386486 | 0,69393 | 0,730522189 | 0,00858 | PCM1     | pericentriolar material 1                                                                                    |
| 0,846745312 | 0,37666 | 0,768437591 | 0,00002 | PCMT1    | protein-L-isoaspartate (D-aspartate) O-methyltransferase                                                     |
| 0,859756486 | 0,23916 | 0,793883931 | 0,00152 | PCMT1    | protein-L-isoaspartate (D-aspartate) O-methyltransferase                                                     |
| 0,812815602 | 0,07195 | 0,806082831 | 0,00109 | PCNA     | proliferating cell nuclear antigen                                                                           |
| 0,860949188 | 0,40037 | 0,787853886 | 0,00226 | PCNP     | PEST proteolytic signal containing nuclear protein                                                           |
| 0,790589117 | 0,19733 | 0,731028724 | 0,00155 | PCNP     | PEST proteolytic signal containing nuclear protein                                                           |
| 0,795536484 | 0,44055 | 0,817335328 | 0,02699 | PCNX     | pecanex homolog (Drosophila)                                                                                 |
| 0,960594864 | 0,77389 | 0,87175824  | 0,0392  | PCNX     | pecanex homolog (Drosophila)                                                                                 |
| 0,932386486 | 0,80327 | 1,427014506 | 0,01763 | PCOLCE   | procollagen C-endopeptidase enhancer                                                                         |
| 0,941478465 | 0,73118 | 0,866937564 | 0,04767 | PCSK2    | proprotein convertase subtilisin/kexin type 2                                                                |
| 1,032398535 | 0,90018 | 0,872967591 | 0,04095 | PCSK5    | proprotein convertase subtilisin/kexin type 5                                                                |
| 0,729510172 | 0,17729 | 0,690158677 | 0,00133 | PCSK6    | proprotein convertase subtilisin/kexin type 6                                                                |
| 1,147107024 | 0,19867 | 1,279872414 | 0,00199 | PCSK7    | proprotein convertase subtilisin/kexin type 7                                                                |
| 0,885767519 | 0,24546 | 0,863938187 | 0,00903 | PCSK9    | proprotein convertase subtilisin/kexin type 9                                                                |
| 0,474013483 | 0,09589 | 0,645281245 | 0,00012 | PCYOX1   | prenylcysteine oxidase 1                                                                                     |
| 0,716480825 | 0,10742 | 0,772175133 | 0,00057 | PCYOX1   | prenylcysteine oxidase 1                                                                                     |
| 1,183451022 | 0,13534 | 1,159899655 | 0,0131  | PDCD1    | programmed cell death 1                                                                                      |
| 0,828170661 | 0,21424 | 0,772175133 | 0,00849 | PDCD10   | programmed cell death 10                                                                                     |
| 1,025978145 | 0,77897 | 1,231998073 | 0,00068 | PDCD1LG2 | programmed cell death 1 ligand 2                                                                             |
| 1,016070143 | 0,90931 | 0,81056512  | 0,00812 | PDCD2    | programmed cell death 2                                                                                      |
| 0,844400887 | 0,12187 | 0,823020345 | 0,00729 | PDCD2    | programmed cell death 2                                                                                      |
| 1,035264924 | 0,61299 | 0,880869374 | 0,01935 | PDCD2    | programmed cell death 2                                                                                      |
| 0,670821112 | 0,07198 | 0,71548826  | 0,00003 | PDCD4    | programmed cell death 4 (neoplastic transformation inhibitor)                                                |
| 0,887611337 | 0,47468 | 0,830470024 | 0,04918 | PDCD5    | programmed cell death 5                                                                                      |
| 0,81056512  | 0,06378 | 0,802737389 | 0,02255 | PDCD6    | programmed cell death 6                                                                                      |
| 0,979420298 | 0,91919 | 0,771105413 | 0,00179 | PDCL     | phosducin-like                                                                                               |
| 0,863339559 | 0,19678 | 0,719965659 | 0,00002 | PDE12    | phosphodiesterase 12                                                                                         |
| 0,930449658 | 0,67493 | 0,880259014 | 0,01181 | PDE12    | phosphodiesterase 12                                                                                         |
| 1,130530567 | 0,26546 | 1,141554707 | 0,02114 | PDE1B    | phosphodiesterase 1B, calmodulin-dependent                                                                   |
| 1,146312186 | 0,30538 | 1,187559666 | 0,00847 | PDE2A    | phosphodiesterase 2A, cGMP-stimulated                                                                        |
| 1,17772279  | 0,29435 | 1,215879283 | 0,00032 | PDE4A    | phosphodiesterase 4A, cAMP-specific                                                                          |
| 1,304954948 | 0,39698 | 1,686462221 | 0,00037 | PDE4B    | phosphodiesterase 4B, cAMP-specific                                                                          |
| 1,202469249 | 0,20125 | 1,209994089 | 0,002   | PDE4D    | phosphodiesterase 4D, cAMP-specific                                                                          |
| 0,90000193  | 0,36529 | 1,172022284 | 0,04033 | PDE4DIP  | phosphodiesterase 4D interacting protein                                                                     |
| 1,186736798 | 0,21634 | 1,329607108 | 0,00086 | PDE4DIP  | phosphodiesterase 4D interacting protein                                                                     |
| 1,199971382 | 0,22584 | 1,336074078 | 0,00098 | PDE4DIP  | phosphodiesterase 4D interacting protein                                                                     |
| 1,133669413 | 0,17085 | 1,117287138 | 0,04422 | PDE4DIP  | phosphodiesterase 4D interacting protein                                                                     |
| 1,186736798 | 0,12367 | 1,134455485 | 0,03892 | PDE5A    | phosphodiesterase 5A, cGMP-specific                                                                          |
| 1,043188594 | 0,57177 | 1,119612889 | 0,0187  | PDE5A    | phosphodiesterase 5A, cGMP-specific                                                                          |
| 1,097331938 | 0,36068 | 1,190856849 | 0,006   | PDE6B    | phosphodiesterase 6B, cGMP-specific, rod, beta                                                               |
| 1,125838586 | 0,26146 | 1,197478705 | 0,00993 | PDE6G    | phosphodiesterase 6G, cGMP-specific, rod, gamma                                                              |
| 1,264879542 | 0,06195 | 1,231998073 | 0,00186 | PDE7B    | phosphodiesterase 7B                                                                                         |
| 0,736623843 | 0,14124 | 0,69640574  | 0,00012 | PDE8A    | phosphodiesterase 8A                                                                                         |
| 1,116512962 | 0,14593 | 1,133669413 | 0,01609 | PDE8B    | phosphodiesterase 8B                                                                                         |
| 1,207480591 | 0,10107 | 1,307671349 | 0,00187 | PDGFB    | platelet-derived growth factor beta polypeptide                                                              |
| 1,160703914 | 0,37836 | 1,240567298 | 0,04622 | PDGFRA   | platelet-derived growth factor receptor, alpha polypeptide                                                   |
| 1,339783602 | 0,13451 | 1,509425969 | 0,00011 | PDGFRB   | platelet-derived growth factor receptor, beta polypeptide                                                    |
| 0,86154616  | 0,23081 | 0,908148418 | 0,04398 | PDHA1    | pyruvate dehydrogenase (lipoamide) alpha 1                                                                   |
| 0,817902059 | 0,14222 | 0,863339559 | 0,03861 | PDHB     | pyruvate dehydrogenase (lipoamide) beta                                                                      |
| 0,831622098 | 0,15297 | 0,876605721 | 0,02434 | PDHB     | pyruvate dehydrogenase (lipoamide) beta                                                                      |
| 0,873572896 | 0,46292 | 0,789493887 | 0,00046 | PDHX     | pyruvate dehydrogenase complex, component X                                                                  |
| 1,450952208 | 0,10648 | 1,370782805 | 0,00202 | PDIA4    | protein disulfide isomerase family A, member 4                                                               |
| 1,25353302  | 0,10635 | 1,169587664 | 0,00399 | PDIA6    | protein disulfide isomerase family A, member 6                                                               |
| 1,286989247 | 0,08853 | 1,195819797 | 0,00387 | PDIA6    | protein disulfide isomerase family A, member 6                                                               |
| 0,831622098 | 0,32835 | 0,7944344   | 0,00502 | PDIK1L   | PDLIM1 interacting kinase 1 like                                                                             |
| 1,307671349 | 0,2007  | 1,373636233 | 0,00398 | PK1      | pyruvate dehydrogenase kinase, isozyme 1                                                                     |
| 1,016070143 | 0,84912 | 1,156688184 | 0,04576 | PK2      | pyruvate dehydrogenase kinase, isozyme 2                                                                     |
| 0,943438251 | 0,59722 | 1,272794935 | 0,00155 | PK2      | pyruvate dehydrogenase kinase, isozyme 2                                                                     |
| 1,093535457 | 0,27941 | 1,119612889 | 0,03394 | PK4      | pyruvate dehydrogenase kinase, isozyme 4                                                                     |
| 0,885153765 | 0,6046  | 0,751059963 | 0,01506 | PDLIM5   | PDZ and LIM domain 5                                                                                         |
| 1,098092814 | 0,27905 | 0,847919965 | 0,02166 | PDLIM5   | PDZ and LIM domain 5                                                                                         |
| 0,982139595 | 0,8996  | 1,262252032 | 0,0127  | PDLIM7   | PDZ and LIM domain 7 [enigma]                                                                                |
| 0,904379378 | 0,21771 | 0,879649076 | 0,02635 | PDP2     | pyruvate dehydrogenase phosphatase catalytic subunit 2                                                       |
| 0,759435845 | 0,3926  | 0,77271055  | 0,00773 | PDPK1    | 3-phosphoinositide dependent protein kinase-1                                                                |
| 0,802181166 | 0,07162 | 0,779704843 | 0,00029 | PDPK1    | 3-phosphoinositide dependent protein kinase-1                                                                |
| 1,204137381 | 0,27262 | 1,22858698  | 0,01343 | PDPN     | podoplanin                                                                                                   |
| 1,325007017 | 0,08462 | 1,217566019 | 0,02389 | PDPN     | podoplanin                                                                                                   |
| 1,089752112 | 0,46359 | 1,184271612 | 0,0328  | PDPN     | podoplanin                                                                                                   |
| 1,189207115 | 0,17008 | 1,151887642 | 0,01387 | PDPN     | pyruvate dehydrogenase phosphatase regulatory subunit                                                        |
| 0,651122095 | 0,08581 | 0,741747467 | 0,00164 | PDS5A    | PDS5, regulator of cohesion maintenance, homolog A (S. cerevisiae)                                           |
| 0,890692901 | 0,48434 | 0,654289036 | 0,0006  | PDS5A    | PDS5, regulator of cohesion maintenance, homolog A (S. cerevisiae)                                           |
| 0,873572896 | 0,37058 | 0,718470088 | 0,00857 | PDS51    | prenyl (decaprenyl) diphosphate synthase, subunit 1                                                          |
| 1,051172909 | 0,56389 | 1,180992661 | 0,04142 | PDXDC1   | pyridoxal-dependent decarboxylase domain containing 1                                                        |
| 0,860949188 | 0,25191 | 0,739181216 | 0,00017 | PDXDC1   | pyridoxal-dependent decarboxylase domain containing 1                                                        |
| 0,955945318 | 0,71528 | 0,79774524  | 0,00783 | PDXDC1   | pyridoxal-dependent decarboxylase domain containing 1                                                        |

|             |         |             |         |          |                                                          |
|-------------|---------|-------------|---------|----------|----------------------------------------------------------|
| 1,002776436 | 0,97278 | 1,121166078 | 0,04861 | PDXK     | pyridoxal (pyridoxine, vitamin B6) kinase                |
| 0,778085177 | 0,17403 | 0,754190038 | 0,01993 | PDZD2    | PDZ domain containing 2                                  |
| 0,963929808 | 0,65789 | 1,146312186 | 0,03673 | PDZD3    | PDZ domain containing 3                                  |
| 0,683493726 | 0,13882 | 0,660669203 | 0,00194 | PDZD8    | PDZ domain containing 8                                  |
| 0,939522749 | 0,71317 | 0,816203046 | 0,0126  | PDZD8    | PDZ domain containing 8                                  |
| 0,988285652 | 0,88219 | 1,090507733 | 0,02274 | PDZK1    | PDZ domain containing 1                                  |
| 0,909408252 | 0,45104 | 1,245737416 | 0,00112 | PEAK1    | NKF3 kinase family member                                |
| 1,012554807 | 0,94691 | 1,143138335 | 0,0365  | PEAK1    | NKF3 kinase family member                                |
| 1,938579634 | 0,08423 | 2,174976782 | 0,00004 | PECAM1   | platelet/endothelial cell adhesion molecule              |
| 1,191682575 | 0,08198 | 1,22603486  | 0,00331 | PECR     | peroxisomal trans-2-enoyl-CoA reductase                  |
| 1,10343374  | 0,22996 | 1,125838586 | 0,02597 | PEG10    | paternally expressed 10                                  |
| 0,890075733 | 0,59356 | 0,72597914  | 0,00137 | PEL11    | pellino homolog 1 (Drosophila)                           |
| 1,156688184 | 0,25121 | 1,113421618 | 0,01951 | PEPD     | peptidase D                                              |
| 0,821310701 | 0,31121 | 0,778624691 | 0,00379 | PER2     | period homolog 2 (Drosophila)                            |
| 0,659296807 | 0,25704 | 0,661127303 | 0,00227 | PER3     | period homolog 3 (Drosophila)                            |
| 0,700763725 | 0,20318 | 0,746389192 | 0,00194 | PER3     | period homolog 3 (Drosophila)                            |
| 0,91383145  | 0,74275 | 0,801625329 | 0,01473 | PERP     | PERP, TP53 apoptosis effector                            |
| 0,778624691 | 0,05517 | 0,87175824  | 0,01207 | PERP     | PERP, TP53 apoptosis effector                            |
| 0,87417862  | 0,18262 | 0,801625329 | 0,00127 | PET112   | PET112 homolog (yeast)                                   |
| 1,02313747  | 0,8997  | 0,84323111  | 0,02913 | PET117   | cytochrome c oxidase assembly factor-like                |
| 0,793883931 | 0,32422 | 0,792784137 | 0,02528 | PEX1     | peroxisomal biogenesis factor 1                          |
| 0,802181166 | 0,13957 | 0,85027416  | 0,02439 | PEX1     | peroxisomal biogenesis factor 1                          |
| 1,127400412 | 0,14846 | 1,172022284 | 0,01133 | PEX11A   | peroxisomal biogenesis factor 11 alpha                   |
| 1,028826708 | 0,72485 | 1,109569472 | 0,04253 | PEX11G   | peroxisomal biogenesis factor 11 gamma                   |
| 1,037419937 | 0,76902 | 0,820172911 | 0,00306 | PEX12    | peroxisomal biogenesis factor 12                         |
| 0,951318276 | 0,56731 | 0,815072332 | 0,00157 | PEX14    | peroxisomal biogenesis factor 14                         |
| 1,07549439  | 0,326   | 1,140763716 | 0,01494 | PEX16    | peroxisomal biogenesis factor 16                         |
| 0,848507902 | 0,13718 | 0,736623843 | 0,00003 | PEX3     | peroxisomal biogenesis factor 3                          |
| 0,800514811 | 0,42632 | 0,669891801 | 0,00018 | PEX3     | peroxisomal biogenesis factor 3                          |
| 0,903752727 | 0,60173 | 0,688725023 | 0,00058 | PEX7     | peroxisomal biogenesis factor 7                          |
| 0,86934456  | 0,20765 | 0,863339559 | 0,02246 | PEX7     | peroxisomal biogenesis factor 7                          |
| 1,118837101 | 0,27228 | 1,095811766 | 0,0484  | PF4V1    | platelet factor 4 variant 1                              |
| 1,029540083 | 0,76692 | 0,860949188 | 0,02062 | PFAS     | phosphoribosylformylglycinamide synthase                 |
| 0,887611337 | 0,27469 | 0,756283999 | 0,00017 | PFDN4    | prefoldin subunit 4                                      |
| 1,004167543 | 0,97719 | 1,174461971 | 0,03923 | PFDN6    | prefoldin subunit 6                                      |
| 1,050444544 | 0,7198  | 1,181811547 | 0,04074 | PFDN6    | prefoldin subunit 6                                      |
| 1,136029265 | 0,10943 | 1,124278924 | 0,03325 | PFDN6    | prefoldin subunit 6                                      |
| 0,853226098 | 0,17039 | 0,798298386 | 0,00786 | PFKFB2   | 6-phosphofructo-2-kinase/fructose-2,6-biphosphatase 2    |
| 0,753145233 | 0,25044 | 0,671751713 | 0,00042 | PGAP1    | post-GPI attachment to proteins 1                        |
| 0,846158597 | 0,50902 | 0,754190038 | 0,01528 | PGAP1    | post-GPI attachment to proteins 1                        |
| 0,793883931 | 0,39261 | 0,674551267 | 0,00128 | PGAP1    | post-GPI attachment to proteins 1                        |
| 0,739181216 | 0,13098 | 0,574747424 | 0,00018 | PGAP1    | post-GPI attachment to proteins 1                        |
| 0,836826243 | 0,18374 | 0,87417862  | 0,03087 | PGAP3    | post-GPI attachment to proteins 3                        |
| 1,138394029 | 0,11871 | 1,20163605  | 0,00212 | PGBD2    | piggyBac transposable element derived 2                  |
| 0,8962667   | 0,47879 | 0,781869643 | 0,00402 | PGBD3    | piggyBac transposable element derived 3                  |
| 1,059952783 | 0,62446 | 1,224336392 | 0,00419 | PGCP     | plasma glutamate carboxypeptidase                        |
| 0,990342872 | 0,92625 | 1,113421618 | 0,0249  | PGD      | phosphogluconate dehydrogenase                           |
| 1,249196126 | 0,13764 | 1,419123356 | 0,0026  | PGF      | placental growth factor                                  |
| 0,734584317 | 0,17493 | 0,679714121 | 0,00002 | PGGT1B   | protein geranylgeranyltransferase type I, beta subunit   |
| 0,698339266 | 0,09507 | 0,676424116 | 0,00656 | PGGT1B   | protein geranylgeranyltransferase type I, beta subunit   |
| 1,027401439 | 0,79055 | 0,887611337 | 0,02613 | PGK1     | phosphoglycerate kinase 1                                |
| 0,906890329 | 0,70526 | 0,763658749 | 0,01395 | PGK1     | phosphoglycerate kinase 1                                |
| 0,628506687 | 0,13667 | 0,69399636  | 0,00035 | PGM2     | phosphoglucomutase 2                                     |
| 0,561749952 | 0,06436 | 0,640379931 | 0,00003 | PGM2     | phosphoglucomutase 2                                     |
| 1,043911927 | 0,61967 | 1,180174343 | 0,01563 | PGM2L1   | phosphoglucomutase 2-like 1                              |
| 1,307671349 | 0,07384 | 1,249196126 | 0,00482 | PGS1     | phosphatidylglycerophosphate synthase 1                  |
| 1,087488391 | 0,47341 | 1,247465572 | 0,0016  | PHACTR1  | phosphatase and actin regulator 1                        |
| 0,87417862  | 0,62485 | 0,76154437  | 0,0068  | PHACTR2  | phosphatase and actin regulator 2                        |
| 0,855002178 | 0,30005 | 0,838568184 | 0,03028 | PHACTR4  | phosphatase and actin regulator 4                        |
| 0,697855382 | 0,07839 | 0,713012859 | 0,00017 | PHAX     | phosphorylated adaptor for RNA export                    |
| 0,784584098 | 0,32714 | 0,729004689 | 0,00784 | PHAX     | phosphorylated adaptor for RNA export                    |
| 1,180174343 | 0,18118 | 1,278099363 | 0,00072 | PHC2     | polyhomeotic homolog 2 (Drosophila)                      |
| 0,933679945 | 0,47104 | 0,898132373 | 0,03791 | PHC3     | polyhomeotic homolog 3 (Drosophila)                      |
| 1,175276328 | 0,34563 | 1,271913007 | 0,01133 | PHF1     | PHD finger protein 1                                     |
| 1,092777739 | 0,61163 | 0,877821798 | 0,00608 | PHF14    | PHD finger protein 14                                    |
| 0,887611337 | 0,48215 | 0,803850991 | 0,01078 | PHF16    | PHD finger protein 16                                    |
| 1,090507733 | 0,55694 | 1,197478705 | 0,00559 | PHF20    | PHD finger protein 20                                    |
| 0,782954296 | 0,25945 | 0,746389192 | 0,00052 | PHF20    | PHD finger protein 20                                    |
| 0,848507902 | 0,26388 | 0,785672517 | 0,04859 | PHF20L1  | PHD finger protein 20-like 1                             |
| 0,697855382 | 0,26039 | 0,832198735 | 0,02836 | PHF20L1  | PHD finger protein 20-like 1                             |
| 1,095052471 | 0,41102 | 1,150291893 | 0,00595 | PHF21A   | PHD finger protein 21A                                   |
| 0,960594864 | 0,55806 | 0,879039561 | 0,01742 | PHF3     | PHD finger protein 3                                     |
| 0,888226796 | 0,43236 | 0,846158597 | 0,00423 | PHF3     | PHD finger protein 3                                     |
| 1,163926534 | 0,05677 | 1,189207115 | 0,00029 | PHF6     | PHD finger protein 6                                     |
| 1,111108729 | 0,34027 | 1,125838586 | 0,02166 | PHF8     | PHD finger protein 8                                     |
| 0,772175133 | 0,2093  | 0,824733549 | 0,00932 | PHKA1    | phosphorylase kinase, alpha 1 (muscle)                   |
| 0,846158597 | 0,44357 | 0,779704843 | 0,00161 | PHKB     | phosphorylase kinase, beta                               |
| 1,040300267 | 0,71231 | 1,17609125  | 0,00214 | PHKG1    | phosphorylase kinase, gamma 1 (muscle)                   |
| 0,990342872 | 0,94969 | 1,234562607 | 0,00224 | PHLDA3   | pleckstrin homology-like domain, family A, member 3      |
| 1,19335743  | 0,13319 | 1,125058485 | 0,02551 | PHLDB1   | pleckstrin homology-like domain, family B, member 1      |
| 0,632001549 | 0,06206 | 0,750539549 | 0,01032 | PHLPP1   | PH domain and leucine rich repeat protein phosphatase 1  |
| 0,827596816 | 0,21354 | 0,711531731 | 0,00058 | PHOSPHO2 | phosphatase, orphan 2                                    |
| 0,808320869 | 0,50964 | 1,231144413 | 0,00071 | PHPT1    | phosphohistidine phosphatase 1                           |
| 1,062159186 | 0,63574 | 1,215879283 | 0,00781 | PHPT1    | phosphohistidine phosphatase 1                           |
| 0,829319546 | 0,19579 | 0,840896415 | 0,01186 | PHRF1    | PHD and ring finger domains 1                            |
| 1,120389214 | 0,23215 | 1,167158102 | 0,00261 | PHTF1    | putative homeodomain transcription factor 1              |
| 1,181811547 | 0,07011 | 1,154285418 | 0,01507 | PI15     | peptidase inhibitor 15                                   |
| 1,23370717  | 0,05897 | 1,260503392 | 0,00398 | PI16     | peptidase inhibitor 16                                   |
| 0,942784536 | 0,51768 | 0,844400887 | 0,01586 | PI4K2B   | phosphatidylinositol 4-kinase type 2 beta                |
| 0,863938187 | 0,28695 | 0,827023368 | 0,00657 | PI4K2B   | phosphatidylinositol 4-kinase type 2 beta                |
| 0,954621014 | 0,85171 | 1,122721422 | 0,04733 | PI4KA    | phosphatidylinositol 4-kinase, catalytic, alpha          |
| 0,882091365 | 0,57676 | 0,810003474 | 0,0033  | PIA51    | protein inhibitor of activated STAT, 1                   |
| 1,108032348 | 0,30037 | 1,143930973 | 0,02441 | PIA52    | protein inhibitor of activated STAT, 2                   |
| 1,108800644 | 0,53816 | 0,810003474 | 0,00216 | PIA52    | protein inhibitor of activated STAT, 2                   |
| 0,787853886 | 0,06042 | 0,816768991 | 0,00498 | PIA53    | protein inhibitor of activated STAT, 3                   |
| 0,855595026 | 0,23775 | 0,70027816  | 0,004   | PIBF1    | progesterone immunomodulatory binding factor 1           |
| 0,751580739 | 0,1354  | 0,814507563 | 0,03385 | PID1     | phosphotyrosine interaction domain containing 1          |
| 1,07997656  | 0,28987 | 1,105730653 | 0,0492  | PIEZO1   | piezo-type mechanosensitive ion channel component 1      |
| 0,597909898 | 0,08671 | 0,639049682 | 0,00027 | PIGA     | phosphatidylinositol glycan anchor biosynthesis, class A |
| 0,899378312 | 0,25417 | 0,805524291 | 0,04847 | PIGB     | phosphatidylinositol glycan anchor biosynthesis, class B |
| 0,954621014 | 0,50406 | 0,865736566 | 0,01263 | PIGC     | phosphatidylinositol glycan anchor biosynthesis, class C |
| 0,714992493 | 0,0652  | 0,786217292 | 0,03605 | PIGD     | phosphatidylinositol glycan anchor biosynthesis, class C |
| 0,708578698 | 0,08294 | 0,820741609 | 0,02939 | PIGF     | phosphatidylinositol glycan anchor biosynthesis, class F |
| 1,109569472 | 0,25198 | 1,195819797 | 0,01829 | PIGG     | phosphatidylinositol glycan anchor biosynthesis, class G |

|             |         |             |         |           |                                                                                              |
|-------------|---------|-------------|---------|-----------|----------------------------------------------------------------------------------------------|
| 0,965267025 | 0,7737  | 0,863339559 | 0,00798 | PIGG      | phosphatidylinositol glycan anchor biosynthesis, class G                                     |
| 0,914465089 | 0,24387 | 0,897510051 | 0,03787 | PIGG      | phosphatidylinositol glycan anchor biosynthesis, class G                                     |
| 0,675487042 | 0,11178 | 0,698823486 | 0,00016 | PIGN      | phosphatidylinositol glycan anchor biosynthesis, class N                                     |
| 1,136029265 | 0,37118 | 1,210833084 | 0,01344 | PIGR      | polymeric immunoglobulin receptor                                                            |
| 1,153485605 | 0,13816 | 1,236275261 | 0,00221 | PIGT      | phosphatidylinositol glycan anchor biosynthesis, class T                                     |
| 0,953298545 | 0,7164  | 0,85086373  | 0,00608 | PIGV      | phosphatidylinositol glycan anchor biosynthesis, class V                                     |
| 0,864537231 | 0,42083 | 0,707106781 | 0,00079 | PIGX      | phosphatidylinositol glycan anchor biosynthesis, class X                                     |
| 0,953959551 | 0,52205 | 0,892546971 | 0,03811 | PIGX      | phosphatidylinositol glycan anchor biosynthesis, class X                                     |
| 0,815072332 | 0,08427 | 0,743806881 | 0,00006 | PIGY      | phosphatidylinositol glycan anchor biosynthesis, class Y                                     |
| 0,941478465 | 0,75019 | 0,854409741 | 0,01995 | PIK3C2A   | phosphoinositide-3-kinase, class 2, alpha polypeptide                                        |
| 0,818469182 | 0,236   | 0,876605721 | 0,00454 | PIK3C3    | phosphoinositide-3-kinase, class 3                                                           |
| 0,76154437  | 0,18975 | 0,748461493 | 0,00761 | PIK3C3    | phosphoinositide-3-kinase, class 3                                                           |
| 1,064370182 | 0,61187 | 0,873572896 | 0,04719 | PIK3CA    | phosphoinositide-3-kinase, catalytic, alpha polypeptide                                      |
| 1,22603486  | 0,1544  | 1,247465572 | 0,01283 | PIK3CD    | phosphoinositide-3-kinase, catalytic, delta polypeptide                                      |
| 1,076240125 | 0,47121 | 1,256142381 | 0,00163 | PIK3IP1   | phosphoinositide-3-kinase interacting protein 1                                              |
| 0,93109482  | 0,82047 | 1,746389192 | 0,02921 | PIK3R1    | phosphoinositide-3-kinase, regulatory subunit 1 (alpha)                                      |
| 1,232852325 | 0,0635  | 1,318593614 | 0,00125 | PIK3R3    | phosphoinositide-3-kinase, regulatory subunit 3 (gamma)                                      |
| 0,791685866 | 0,11406 | 0,801625329 | 0,00366 | PIK3R4    | phosphoinositide-3-kinase, regulatory subunit 4                                              |
| 1,304954948 | 0,063   | 1,308578071 | 0,00144 | PIK3R5    | phosphoinositide-3-kinase, regulatory subunit 5                                              |
| 1,165541198 | 0,16409 | 1,311302014 | 0,00136 | PIKFYVE   | phosphoinositide kinase, FYVE finger containing                                              |
| 1,250062303 | 0,13031 | 1,319507911 | 0,00097 | PILRA     | paired immunoglobulin-like type 2 receptor alpha                                             |
| 0,808320869 | 0,38471 | 1,194991205 | 0,04767 | PILRB     | paired immunoglobulin-like type 2 receptor beta                                              |
| 0,871154192 | 0,07668 | 0,815072332 | 0,00338 | PIN4      | protein (peptidylprolyl cis/trans isomerase) NIMA-interacting, 4 (parvulin)                  |
| 1,071030823 | 0,43205 | 1,117287138 | 0,03459 | PIT4K2A   | phosphatidylinositol-5-phosphate 4-kinase, type II, alpha                                    |
| 1,152686347 | 0,22184 | 1,209155676 | 0,00144 | PITPNC1   | phosphatidylinositol transfer protein, cytoplasmic 1                                         |
| 1,232852325 | 0,21746 | 1,199139914 | 0,04095 | PITPNC1   | phosphatidylinositol transfer protein, cytoplasmic 1                                         |
| 1,286989247 | 0,05158 | 1,403471726 | 0,00013 | PITPNM1   | phosphatidylinositol transfer protein, membrane-associated 1                                 |
| 0,863938187 | 0,27406 | 0,881480156 | 0,01429 | PITRM1    | pitriylsin metalloproteinase 1                                                               |
| 1,004167543 | 0,96631 | 1,168777249 | 0,0313  | PITRM1    | pitriylsin metalloproteinase 1                                                               |
| 0,70759708  | 0,13487 | 0,835087919 | 0,03674 | PITX1     | paired-like homeodomain 1                                                                    |
| 1,120389214 | 0,25505 | 1,23370717  | 0,00844 | PIWIL2    | piwi-like 2 (Drosophila)                                                                     |
| 1,038139271 | 0,89603 | 0,880259014 | 0,00937 | PJA2      | praja ring finger 2                                                                          |
| 1,133669413 | 0,23908 | 1,143138335 | 0,03306 | PKD1L2    | polycystic kidney disease 1-like 2                                                           |
| 0,995849753 | 0,95075 | 1,094293701 | 0,03447 | PKD1L2    | polycystic kidney disease 1-like 2                                                           |
| 1,028113827 | 0,81883 | 1,098854218 | 0,03035 | PKD2L1    | polycystic kidney disease 2-like 1                                                           |
| 0,869947353 | 0,40888 | 0,793333843 | 0,01947 | PKIB      | protein kinase (cAMP-dependent, catalytic) inhibitor beta                                    |
| 1,139183377 | 0,22621 | 1,187559666 | 0,00888 | PKLR      | pyruvate kinase, liver and RBC                                                               |
| 1,136029265 | 0,21713 | 1,256142381 | 0,00136 | PKLR      | pyruvate kinase, liver and RBC                                                               |
| 0,816768991 | 0,59646 | 1,282536603 | 0,04441 | PKM2      | pyruvate kinase, muscle                                                                      |
| 1,07549439  | 0,45528 | 1,237132479 | 0,00158 | PKN3      | protein kinase N3                                                                            |
| 1,028113827 | 0,81553 | 1,141554707 | 0,03764 | PLA2G10   | phospholipase A2, group X                                                                    |
| 0,675955417 | 0,05234 | 0,688725023 | 0,00018 | PLA2G12A  | phospholipase A2, group XIIA                                                                 |
| 1,212512819 | 0,18688 | 1,314031627 | 0,00083 | PLA2G16   | phospholipase A2, group XVI                                                                  |
| 0,846745312 | 0,20098 | 0,852044095 | 0,04045 | PLA2G4F   | phospholipase A2, group IVF                                                                  |
| 1,247465572 | 0,06609 | 1,296839555 | 0,00026 | PLA2G5    | phospholipase A2, group V                                                                    |
| 1,030968319 | 0,76039 | 1,204137381 | 0,0014  | PLA2G6    | phospholipase A2, group VI (cytosolic, calcium-independent)                                  |
| 1,037419937 | 0,70418 | 1,127400412 | 0,01956 | PLA2G6    | phospholipase A2, group VI (cytosolic, calcium-independent)                                  |
| 0,668500248 | 0,07763 | 0,679714121 | 0,00162 | PLA2R1    | phospholipase A2 receptor 1, 180kDa                                                          |
| 0,899378312 | 0,33361 | 0,762600827 | 0,00014 | PLA2R1    | phospholipase A2 receptor 1, 180kDa                                                          |
| 0,927230546 | 0,4096  | 0,882702996 | 0,0397  | PLAA      | phospholipase A2-activating protein                                                          |
| 1,147902414 | 0,51709 | 0,7944344   | 0,00364 | PLAA      | phospholipase A2-activating protein                                                          |
| 0,835666959 | 0,08013 | 0,897510051 | 0,01435 | PLAC2     | placenta-specific 2 (non-protein coding)                                                     |
| 1,130530567 | 0,29475 | 1,25092908  | 0,00166 | PLAC4     | placenta-specific 4                                                                          |
| 0,698339266 | 0,24294 | 0,668963777 | 0,00063 | PLAGL1    | pleiomorphic adenoma gene-like 1                                                             |
| 0,887611337 | 0,58439 | 0,795536484 | 0,01814 | PLAGL1    | pleiomorphic adenoma gene-like 1                                                             |
| 0,953959551 | 0,8508  | 0,650220073 | 0,00001 | PLAGL1    | pleiomorphic adenoma gene-like 1                                                             |
| 0,857376037 | 0,28319 | 0,852634892 | 0,00486 | PLAGL2    | pleiomorphic adenoma gene-like 2                                                             |
| 1,011853201 | 0,901   | 1,296839555 | 0,00028 | PLCB1     | phospholipase C, beta 1 (phosphoinositide-specific)                                          |
| 1,113421618 | 0,21692 | 1,198309021 | 0,00009 | PLCB4     | phospholipase C, beta 4                                                                      |
| 0,928516852 | 0,59819 | 1,216722359 | 0,00015 | PLCG1     | phospholipase C, gamma 1                                                                     |
| 0,924022572 | 0,64818 | 0,796640096 | 0,01417 | PLD1      | phospholipase D1, phosphatidylcholine-specific                                               |
| 0,703684188 | 0,13359 | 0,758383773 | 0,00504 | PLD1      | phospholipase D1, phosphatidylcholine-specific                                               |
| 1,202469249 | 0,54753 | 1,490710387 | 0,00097 | PLD3      | phospholipase D family, member 3                                                             |
| 1,143930973 | 0,15895 | 1,17772279  | 0,0039  | PLD4      | phospholipase D family, member 4                                                             |
| 0,732550437 | 0,49787 | 0,70759708  | 0,00064 | PLDN      | pallidin homolog (mouse)                                                                     |
| 1,363202607 | 0,09321 | 1,2397077   | 0,00124 | PLEK      | pleckstrin                                                                                   |
| 0,878430468 | 0,39717 | 0,882091365 | 0,04239 | PLEKHA5   | pleckstrin homology domain containing, family A member 5                                     |
| 0,740719899 | 0,20514 | 0,712518807 | 0,00107 | PLEKHA5   | pleckstrin homology domain containing, family A member 5                                     |
| 1,0132569   | 0,93428 | 0,899378312 | 0,0202  | PLEKHA8   | pleckstrin homology domain containing, family A (phosphoinositide binding specific) member 8 |
| 1,102669163 | 0,2451  | 1,146312186 | 0,00612 | PLEKHA8P1 | pleckstrin homology domain containing, family A member 8 pseudogene 1                        |
| 0,738157203 | 0,44143 | 0,819604608 | 0,0049  | PLEKHB2   | pleckstrin homology domain containing, family B (evectins) member 2                          |
| 1,217566019 | 0,255   | 1,308578071 | 0,00068 | PLEKHF1   | pleckstrin homology domain containing, family F (with FYVE domain) member 1                  |
| 0,640379931 | 0,07131 | 0,591725511 | 0,00054 | PLEKHF2   | pleckstrin homology domain containing, family F (with FYVE domain) member 2                  |
| 1,242288282 | 0,174   | 1,372684431 | 0,00043 | PLEKHG2   | pleckstrin homology domain containing, family G (with RhoGef domain) member 2                |
| 1,074004472 | 0,37172 | 1,151089491 | 0,04729 | PLEKHJ1   | pleckstrin homology domain containing, family J member 1                                     |
| 0,837406488 | 0,42567 | 0,775930854 | 0,01465 | PLEKHJ3   | pleckstrin homology domain containing, family J member 3                                     |
| 1,342572503 | 0,13256 | 1,488645255 | 0,00284 | PLEKHO1   | pleckstrin homology domain containing, family O member 1                                     |
| 1,263127262 | 0,06553 | 1,341642225 | 0,00072 | PLEKHO2   | pleckstrin homology domain containing, family O member 2                                     |
| 1,033114388 | 0,81307 | 1,246601194 | 0,0013  | PLK1      | polo-like kinase 1                                                                           |
| 1,222640278 | 0,27932 | 1,143930973 | 0,04825 | PLK1S1    | polo-like kinase 1 substrate 1                                                               |
| 1,171210181 | 0,37395 | 1,180174343 | 0,00658 | PLK3      | polo-like kinase 3                                                                           |
| 1,044635763 | 0,78135 | 0,84323111  | 0,01897 | PLK4      | polo-like kinase 4                                                                           |
| 1,285206337 | 0,13151 | 1,424050196 | 0,00067 | PLOD1     | procollagen-lysine, 2-oxoglutarate 5-dioxygenase 1                                           |
| 1,336074078 | 0,0751  | 1,459020344 | 0,00018 | PLOD3     | procollagen-lysine, 2-oxoglutarate 5-dioxygenase 3                                           |
| 0,762600827 | 0,185   | 0,748461493 | 0,00041 | PLRG1     | pleiotropic regulator 1                                                                      |
| 0,682073917 | 0,06027 | 0,742261785 | 0,00347 | PLS3      | plastin 3                                                                                    |
| 1,164733586 | 0,68443 | 1,436940177 | 0,00328 | PLTP      | phospholipid transfer protein                                                                |
| 1,569168196 | 0,06197 | 1,568080908 | 0,00138 | PLVAP     | plasmalemma vesicle associated protein                                                       |
| 1,168777249 | 0,40628 | 1,421092043 | 0,00829 | PLXDC1    | plexin domain containing 1                                                                   |
| 0,989656656 | 0,89199 | 1,118837101 | 0,04993 | PLXNA3    | plexin A3                                                                                    |
| 1,171210181 | 0,27021 | 1,254402205 | 0,00302 | PLXNA3    | plexin A3                                                                                    |
| 1,015366101 | 0,8721  | 0,823591017 | 0,04479 | PLXNA4    | plexin A4                                                                                    |
| 1,17772279  | 0,24657 | 1,25962998  | 0,02969 | PLXNC1    | plexin C1                                                                                    |
| 1,306765254 | 0,08802 | 1,444930398 | 0,00047 | PLXND1    | plexin D1                                                                                    |
| 1,092020546 | 0,40294 | 1,125058485 | 0,00325 | PM20D1    | peptidase M20 domain containing 1                                                            |
| 0,782954296 | 0,31521 | 0,737134609 | 0,00084 | PM20D2    | peptidase M20 domain containing 2                                                            |
| 0,804966138 | 0,32441 | 0,770571108 | 0,00213 | PM20D2    | peptidase M20 domain containing 2                                                            |
| 1,192508872 | 0,27312 | 1,362258035 | 0,00053 | PMPA1     | prostate transmembrane protein, androgen induced 1                                           |
| 1,331451613 | 0,15627 | 1,4063932   | 0,00034 | PMPA1     | prostate transmembrane protein, androgen induced 1                                           |
| 1,156688184 | 0,27975 | 1,293248932 | 0,00495 | PMPA1     | prostate transmembrane protein, androgen induced 1                                           |
| 1,049716684 | 0,67272 | 1,212512819 | 0,00483 | PML       | promyelocytic leukemia                                                                       |
| 1,081474763 | 0,49861 | 1,143930973 | 0,04173 | PML       | promyelocytic leukemia                                                                       |
| 1,07997656  | 0,30797 | 1,180992661 | 0,00539 | PML       | promyelocytic leukemia                                                                       |
| 0,79774524  | 0,05642 | 0,886381699 | 0,02924 | PMS2L2    | postmeiotic segregation increased 2-like 2 pseudogene                                        |

|             |         |             |         |           |                                                                                                           |
|-------------|---------|-------------|---------|-----------|-----------------------------------------------------------------------------------------------------------|
| 0,828744904 | 0,27929 | 1,114193651 | 0,02859 | PMS2P1    | postmeiotic segregation increased 2 pseudogene 1                                                          |
| 1,061423209 | 0,6017  | 1,147107024 | 0,00194 | PNCK      | pregnancy up-regulated non-ubiquitously expressed CaM kinase                                              |
| 0,711038705 | 0,19595 | 0,627635596 | 0,0006  | PNISR     | PNN-interacting serine/arginine-rich protein                                                              |
| 0,893165852 | 0,45108 | 0,800514811 | 0,00118 | PNMA1     | paraneoplastic antigen MA1                                                                                |
| 1,018891197 | 0,82543 | 1,164733586 | 0,01583 | PNMA3     | paraneoplastic antigen MA3                                                                                |
| 1,024556823 | 0,79089 | 1,154285418 | 0,00735 | PNMAL2    | PNMA-like 2                                                                                               |
| 0,732550437 | 0,1987  | 0,845572287 | 0,0235  | PNN       | pinin, desmosome associated protein                                                                       |
| 1,084477409 | 0,69805 | 0,716977624 | 0,00021 | PNP1      | partner of NOB1 homolog (S. cerevisiae)                                                                   |
| 0,761016669 | 0,34499 | 0,848507902 | 0,02963 | PNP       | purine nucleoside phosphorylase                                                                           |
| 1,167158102 | 0,1933  | 1,25962998  | 0,00441 | PNPLA2    | patatin-like phospholipase domain containing 2                                                            |
| 0,741233505 | 0,2794  | 0,805524291 | 0,00325 | PNPLA8    | patatin-like phospholipase domain containing 8                                                            |
| 0,791685866 | 0,27482 | 0,738157203 | 0,00021 | PNPLA8    | patatin-like phospholipase domain containing 8                                                            |
| 0,754712984 | 0,20938 | 0,713507253 | 0,00052 | PNPLA8    | patatin-like phospholipase domain containing 8                                                            |
| 0,933032992 | 0,66439 | 1,147902414 | 0,00834 | PNPO      | pyridoxamine 5'-phosphate oxidase                                                                         |
| 0,827023368 | 0,22239 | 0,839149637 | 0,04865 | PNPT1     | polyribonucleotide nucleotidyltransferase 1                                                               |
| 0,810003474 | 0,26863 | 0,795536484 | 0,00637 | POC1B     | POC1 centriolar protein homolog B (Chlamydomonas)                                                         |
| 1,111108729 | 0,48239 | 1,237990291 | 0,01298 | PODAN     | podocan                                                                                                   |
| 1,245737416 | 0,12643 | 1,424050196 | 0,00602 | PODXL     | podocalyxin-like                                                                                          |
| 1,161508732 | 0,15645 | 1,251796459 | 0,00037 | POFUT2    | protein O-fucosyltransferase 2                                                                            |
| 1,086734863 | 0,33542 | 1,146312186 | 0,02076 | POFUT2    | protein O-fucosyltransferase 2                                                                            |
| 0,730016005 | 0,31872 | 0,568408487 | 0,00015 | POGK      | pogo transposable element with KRAB domain                                                                |
| 0,664803554 | 0,08368 | 0,79774524  | 0,00077 | POGLUT1   | protein O-glucosyltransferase 1                                                                           |
| 0,754712984 | 0,05032 | 0,847332435 | 0,00557 | POLA1     | polymerase (DNA directed), alpha 1, catalytic subunit                                                     |
| 1,180992661 | 0,15479 | 1,225185332 | 0,00334 | POLA2     | polymerase (DNA directed), alpha 2 (70kD subunit)                                                         |
| 1,012554807 | 0,91534 | 1,151887642 | 0,0261  | POLA2     | polymerase (DNA directed), alpha 2 (70kD subunit)                                                         |
| 0,916368645 | 0,53915 | 0,824162085 | 0,00018 | POLD3     | polymerase (DNA-directed), delta 3, accessory subunit                                                     |
| 0,928516852 | 0,6264  | 1,153485605 | 0,01216 | POLD4     | polymerase (DNA-directed), delta 4                                                                        |
| 1,070288698 | 0,53206 | 1,121166078 | 0,04667 | POLDIP3   | polymerase (DNA-directed), delta interacting protein 3                                                    |
| 0,816203046 | 0,18587 | 0,763658749 | 0,00324 | POLE2     | polymerase (DNA directed), epsilon 2 (p59 subunit)                                                        |
| 0,845572287 | 0,07733 | 0,886381699 | 0,04576 | POLG      | polymerase (DNA directed), gamma                                                                          |
| 0,810003474 | 0,11429 | 0,819036698 | 0,03978 | POLH      | polymerase (DNA directed), eta                                                                            |
| 0,90000193  | 0,44731 | 0,838568184 | 0,00524 | POLH      | polymerase (DNA directed), eta                                                                            |
| 0,948684315 | 0,67436 | 1,181811547 | 0,04134 | POLL      | polymerase (DNA directed), lambda                                                                         |
| 0,93109482  | 0,49671 | 1,185092771 | 0,028   | POLM      | polymerase (DNA directed), mu                                                                             |
| 0,79940583  | 0,18261 | 0,732550437 | 0,00033 | POLR1B    | polymerase (RNA) I polypeptide B, 128kDa                                                                  |
| 1,096571589 | 0,59083 | 0,823020345 | 0,01084 | POLR1B    | polymerase (RNA) I polypeptide B, 128kDa                                                                  |
| 0,866937564 | 0,15691 | 0,841479482 | 0,00252 | POLR1D    | polymerase (RNA) I polypeptide D, 16kDa                                                                   |
| 0,868742185 | 0,18219 | 0,876605721 | 0,01775 | POLR1E    | polymerase (RNA) I polypeptide E, 53kDa                                                                   |
| 0,963261894 | 0,58212 | 0,883927531 | 0,02328 | POLR2B    | polymerase (RNA) II (DNA directed) polypeptide B, 140kDa                                                  |
| 0,78132788  | 0,17554 | 0,7944344   | 0,0147  | POLR2B    | polymerase (RNA) II (DNA directed) polypeptide B, 140kDa                                                  |
| 0,76950361  | 0,05685 | 0,880869374 | 0,01903 | POLR2B    | polymerase (RNA) II (DNA directed) polypeptide B, 140kDa                                                  |
| 1,004167543 | 0,97776 | 1,173648178 | 0,00414 | POLR2C    | polymerase (RNA) II (DNA directed) polypeptide C, 33kDa                                                   |
| 0,999307093 | 0,99194 | 1,111108729 | 0,01659 | POLR2C    | polymerase (RNA) II (DNA directed) polypeptide C, 33kDa                                                   |
| 1,118061851 | 0,33647 | 0,863339559 | 0,02002 | POLR2D    | polymerase (RNA) II (DNA directed) polypeptide D                                                          |
| 0,798851916 | 0,37065 | 0,792234811 | 0,02512 | POLR2J4   | polymerase (RNA) II (DNA directed) polypeptide J4, pseudogene                                             |
| 0,915733686 | 0,35103 | 0,901250463 | 0,02164 | POLR3B    | polymerase (RNA) III (DNA directed) polypeptide B                                                         |
| 0,735093668 | 0,21906 | 0,727490342 | 0,00001 | POLR3B    | polymerase (RNA) III (DNA directed) polypeptide B                                                         |
| 0,775930854 | 0,08712 | 0,905006463 | 0,04124 | POLR3C    | polymerase (RNA) III (DNA directed) polypeptide C (62kD)                                                  |
| 1,096571589 | 0,35618 | 1,151089491 | 0,00887 | POLR3D    | polymerase (RNA) III (DNA directed) polypeptide D, 44kDa                                                  |
| 0,815637493 | 0,18549 | 0,897510051 | 0,01848 | POLR3E    | polymerase (RNA) III (DNA directed) polypeptide E (80kD)                                                  |
| 0,866937564 | 0,42045 | 0,76950361  | 0,00556 | POLR3E    | polymerase (RNA) III (DNA directed) polypeptide E (80kD)                                                  |
| 0,807201075 | 0,1725  | 0,864537231 | 0,04829 | POLR3F    | polymerase (RNA) III (DNA directed) polypeptide F, 39 kDa                                                 |
| 0,647072827 | 0,08379 | 0,635515845 | 0,00001 | POLR3G    | polymerase (RNA) III (DNA directed) polypeptide G (32kD)                                                  |
| 0,844986384 | 0,1131  | 0,788400174 | 0,01081 | POLR3G    | polymerase (RNA) III (DNA directed) polypeptide G (32kD)                                                  |
| 0,965936329 | 0,61096 | 0,868742185 | 0,00204 | POLR3G    | polymerase (RNA) III (DNA directed) polypeptide G (32kD)                                                  |
| 1,080725402 | 0,45667 | 1,20664392  | 0,00729 | POM121L9P | POM121 membrane glycoprotein-like 9, pseudogene                                                           |
| 0,936921447 | 0,75675 | 0,729510172 | 0,00165 | POMP      | proteasome maturation protein                                                                             |
| 0,503477775 | 0,09337 | 0,749499801 | 0,00768 | PON2      | paraoxonase 2                                                                                             |
| 1,148698355 | 0,39576 | 1,258751714 | 0,00356 | PORCN     | porcupine homolog (Drosophila)                                                                            |
| 1,057750964 | 0,68348 | 1,104198847 | 0,04255 | POU2F1    | POU class 2 homeobox 1                                                                                    |
| 0,62546454  | 0,10277 | 0,612592666 | 0,00009 | POU2F3    | POU class 2 homeobox 3                                                                                    |
| 0,96996191  | 0,75134 | 1,147902414 | 0,04047 | POU5F1B   | POU class 5 homeobox 1B                                                                                   |
| 0,950659101 | 0,66737 | 1,114966219 | 0,03204 | POU5F1P3  | POU class 5 homeobox 1 pseudogene 3                                                                       |
| 1,086734863 | 0,37542 | 1,20664392  | 0,00059 | POU5F2    | POU domain class 5, transcription factor 2                                                                |
| 1,152686347 | 0,08592 | 1,283425898 | 0,00067 | POU6F1    | POU class 6 homeobox 1                                                                                    |
| 1,078480432 | 0,39264 | 1,168777249 | 0,00987 | POU6F1    | POU class 6 homeobox 1                                                                                    |
| 1,025267238 | 0,79576 | 1,121943481 | 0,03948 | POU6F2    | POU class 6 homeobox 2                                                                                    |
| 1,054091423 | 0,59495 | 1,185092771 | 0,01597 | PP13      | hypothetical LOC100129503                                                                                 |
| 0,922742493 | 0,29882 | 0,855002178 | 0,00335 | PPA2      | pyrophosphatase (inorganic) 2                                                                             |
| 0,937571096 | 0,83298 | 0,784584098 | 0,02173 | PPA2      | pyrophosphatase (inorganic) 2                                                                             |
| 1,033830736 | 0,92604 | 0,820741609 | 0,01686 | PPA2      | pyrophosphatase (inorganic) 2                                                                             |
| 0,755236293 | 0,05239 | 0,764718139 | 0,00005 | PPA2      | pyrophosphatase (inorganic) 2                                                                             |
| 1,32592576  | 0,10253 | 1,252664439 | 0,00074 | PPAPDC1A  | phosphatidic acid phosphatase type 2 domain containing 1A                                                 |
| 0,797192477 | 0,21165 | 0,815072332 | 0,00409 | PPAPDC2   | phosphatidic acid phosphatase type 2 domain containing 2                                                  |
| 0,804408371 | 0,07192 | 0,85797053  | 0,01113 | PPARA     | peroxisome proliferator-activated receptor alpha                                                          |
| 0,788400174 | 0,05512 | 0,801625329 | 0,00069 | PPARD     | peroxisome proliferator-activated receptor delta                                                          |
| 0,934975198 | 0,79818 | 0,823591017 | 0,00203 | PPARGC1B  | peroxisome proliferator-activated receptor gamma, coactivator 1 beta                                      |
| 0,856188285 | 0,42413 | 0,821310701 | 0,02255 | PPAT      | phosphoribosyl pyrophosphate amidotransferase                                                             |
| 0,906890329 | 0,42442 | 0,846745312 | 0,02845 | PPAT      | phosphoribosyl pyrophosphate amidotransferase                                                             |
| 1,171210181 | 0,07273 | 1,340712592 | 0       | PPEF1     | protein phosphatase, EF-hand calcium binding domain 1                                                     |
| 0,804966138 | 0,30372 | 0,773246337 | 0,00078 | PPF1A1    | protein tyrosine phosphatase, receptor type, f polypeptide (PTPRF), interacting protein (liprin), alpha 1 |
| 0,776468875 | 0,14187 | 0,821880187 | 0,04465 | PPF1A1    | protein tyrosine phosphatase, receptor type, f polypeptide (PTPRF), interacting protein (liprin), alpha 1 |
| 0,849096246 | 0,15938 | 0,857376037 | 0,02059 | PPF1A1    | protein tyrosine phosphatase, receptor type, f polypeptide (PTPRF), interacting protein (liprin), alpha 1 |
| 1,162314108 | 0,13552 | 1,219255094 | 0,00067 | PPF1A2    | protein tyrosine phosphatase, receptor type, f polypeptide (PTPRF), interacting protein (liprin), alpha 2 |
| 0,824162085 | 0,0663  | 0,738669032 | 0,00128 | PPF1A3    | protein tyrosine phosphatase, receptor type, f polypeptide (PTPRF), interacting protein (liprin), alpha 3 |
| 0,745355193 | 0,08304 | 0,585650591 | 0,00013 | PPF1BP1   | PTPRF interacting protein, binding protein 1 (liprin beta 1)                                              |
| 1,031683179 | 0,72769 | 1,125838586 | 0,01744 | PPF1BP2   | PTPRF interacting protein, binding protein 2 (liprin beta 2)                                              |
| 0,883927531 | 0,11321 | 0,922742493 | 0,04639 | PP1A      | peptidylprolyl isomerase A (cyclophilin A)                                                                |
| 0,828744904 | 0,19684 | 0,783497187 | 0,00017 | PP1A      | peptidylprolyl isomerase A (cyclophilin A)                                                                |
| 0,869947353 | 0,76316 | 1,204972315 | 0,04909 | PP1B      | peptidylprolyl isomerase B (cyclophilin B)                                                                |
| 0,690158677 | 0,07331 | 0,815637493 | 0,00953 | PP1C      | peptidylprolyl isomerase C (cyclophilin C)                                                                |
| 0,688725023 | 0,43707 | 0,670821112 | 0,02362 | PP1F      | peptidylprolyl isomerase F                                                                                |
| 0,733566672 | 0,39633 | 0,731028724 | 0,0004  | PP1G      | peptidylprolyl isomerase G (cyclophilin G)                                                                |
| 0,677362489 | 0,08053 | 0,823020345 | 0,00105 | PP1G      | peptidylprolyl isomerase G (cyclophilin G)                                                                |
| 0,824162085 | 0,34172 | 0,785128119 | 0,00089 | PP1G      | peptidylprolyl isomerase G (cyclophilin G)                                                                |
| 1,05553718  | 0,59092 | 1,121166078 | 0,01827 | PP1H      | peptidylprolyl isomerase H (cyclophilin H)                                                                |
| 1,00765376  | 0,93851 | 1,189207115 | 0,01653 | PP1L2     | peptidylprolyl isomerase (cyclophilin)-like 2                                                             |
| 1,112650121 | 0,3254  | 1,157490217 | 0,00376 | PP1L2     | peptidylprolyl isomerase (cyclophilin)-like 2                                                             |
| 1,058484395 | 0,61785 | 1,192508872 | 0,00146 | PP1L2     | peptidylprolyl isomerase (cyclophilin)-like 2                                                             |
| 1,118061851 | 0,30977 | 1,17609125  | 0,00163 | PP1L2     | peptidylprolyl isomerase (cyclophilin)-like 2                                                             |
| 0,940826108 | 0,73928 | 0,838568184 | 0,04494 | PP1L4     | peptidylprolyl isomerase (cyclophilin)-like 4                                                             |
| 0,858565436 | 0,19699 | 0,817335328 | 0,00601 | PP1P5K1   | diphosphoinositol pentakisphosphate kinase 1                                                              |
| 0,983502074 | 0,91168 | 0,819036698 | 0,00732 | PPM1A     | protein phosphatase, Mg <sup>2+</sup> /Mn <sup>2+</sup> dependent, 1A                                     |
| 0,844400887 | 0,5261  | 0,65747138  | 0,00021 | PPM1A     | protein phosphatase, Mg <sup>2+</sup> /Mn <sup>2+</sup> dependent, 1A                                     |



|             |         |             |         |          |                                                                                                     |
|-------------|---------|-------------|---------|----------|-----------------------------------------------------------------------------------------------------|
| 0,78024548  | 0,22717 | 0,809442217 | 0,00705 | PPM1A    | protein phosphatase, Mg2+/Mn2+ dependent, 1A                                                        |
| 0,730522189 | 0,22249 | 0,683967652 | 0,00025 | PPM1A    | protein phosphatase, Mg2+/Mn2+ dependent, 1A                                                        |
| 0,903752727 | 0,53009 | 0,846745312 | 0,0191  | PPM1B    | protein phosphatase, Mg2+/Mn2+ dependent, 1B                                                        |
| 1,0132569   | 0,94956 | 0,825305409 | 0,04126 | PPM1B    | protein phosphatase, Mg2+/Mn2+ dependent, 1B                                                        |
| 0,727994774 | 0,17957 | 0,70514898  | 0,00625 | PPM1D    | protein phosphatase, Mg2+/Mn2+ dependent, 1D                                                        |
| 1,014662547 | 0,87298 | 1,167158102 | 0,0156  | PPM1F    | protein phosphatase, Mg2+/Mn2+ dependent, 1F                                                        |
| 1,199139914 | 0,32992 | 1,208317843 | 0,03675 | PPM1G    | protein phosphatase, Mg2+/Mn2+ dependent, 1G                                                        |
| 0,893785162 | 0,15159 | 0,895025071 | 0,01986 | PPM1H    | protein phosphatase, Mg2+/Mn2+ dependent, 1H                                                        |
| 0,866336856 | 0,53258 | 1,271913007 | 0,04191 | PPM1K    | protein phosphatase, Mg2+/Mn2+ dependent, 1K                                                        |
| 1,038139271 | 0,83639 | 0,732550437 | 0,00129 | PPM1L    | protein phosphatase, Mg2+/Mn2+ dependent, 1L                                                        |
| 1,113421618 | 0,31404 | 1,20664392  | 0,01008 | PPM1N    | protein phosphatase, Mg2+/Mn2+ dependent, 1N (putative)                                             |
| 1,136029265 | 0,25223 | 1,132883885 | 0,02357 | PPOX     | protoporphyrinogen oxidase                                                                          |
| 0,796088099 | 0,34226 | 0,77916458  | 0,0074  | PPP1CB   | protein phosphatase 1, catalytic subunit, beta isozyme                                              |
| 0,737134609 | 0,0882  | 0,767905135 | 0,00193 | PPP1CB   | protein phosphatase 1, catalytic subunit, beta isozyme                                              |
| 0,968618189 | 0,83468 | 1,204972315 | 0,01338 | PPP1R10  | protein phosphatase 1, regulatory (inhibitor) subunit 10                                            |
| 0,967947027 | 0,73506 | 0,837987135 | 0,00758 | PPP1R11  | protein phosphatase 1, regulatory (inhibitor) subunit 11                                            |
| 0,772175133 | 0,18896 | 0,735093668 | 0,00011 | PPP1R12A | protein phosphatase 1, regulatory (inhibitor) subunit 12A                                           |
| 0,985549337 | 0,94709 | 0,839731493 | 0,01525 | PPP1R12A | protein phosphatase 1, regulatory (inhibitor) subunit 12A                                           |
| 1,126619228 | 0,27879 | 1,161508732 | 0,02414 | PPP1R12B | protein phosphatase 1, regulatory (inhibitor) subunit 12B                                           |
| 0,716977624 | 0,05479 | 0,757858283 | 0,0005  | PPP1R13L | protein phosphatase 1, regulatory (inhibitor) subunit 13 like                                       |
| 0,571965487 | 0,06469 | 0,820172911 | 0,04757 | PPP1R14B | protein phosphatase 1, regulatory (inhibitor) subunit 14B                                           |
| 1,126619228 | 0,19965 | 1,140763716 | 0,01479 | PPP1R14D | protein phosphatase 1, regulatory (inhibitor) subunit 14D                                           |
| 0,951977908 | 0,68733 | 0,803850991 | 0,02654 | PPP1R15B | protein phosphatase 1, regulatory (inhibitor) subunit 15B                                           |
| 0,90312651  | 0,55768 | 0,806082831 | 0,0106  | PPP1R2   | protein phosphatase 1, regulatory (inhibitor) subunit 2                                             |
| 1,02313747  | 0,81037 | 1,152686347 | 0,04676 | PPP1R2P9 | protein phosphatase 1, regulatory (inhibitor) subunit 2 pseudogene 9                                |
| 1,057018041 | 0,53863 | 1,125058485 | 0,03702 | PPP1R3B  | protein phosphatase 1, regulatory (inhibitor) subunit 3B                                            |
| 0,552099424 | 0,1068  | 0,81056512  | 0,00029 | PPP1R7   | protein phosphatase 1, regulatory (inhibitor) subunit 7                                             |
| 0,812815602 | 0,09041 | 0,839731493 | 0,00442 | PPP1R8   | protein phosphatase 1, regulatory (inhibitor) subunit 8                                             |
| 1,122721422 | 0,27054 | 1,139973273 | 0,00871 | PPP1R9A  | protein phosphatase 1, regulatory (inhibitor) subunit 9A                                            |
| 1,155085785 | 0,32458 | 1,311302014 | 0,04438 | PPP1R9B  | protein phosphatase 1, regulatory (inhibitor) subunit 9B                                            |
| 0,894404902 | 0,39587 | 0,735093668 | 0,00152 | PPP2CA   | protein phosphatase 2, catalytic subunit, alpha isozyme                                             |
| 0,806082831 | 0,41714 | 0,607097442 | 0       | PPP2CA   | protein phosphatase 2, catalytic subunit, alpha isozyme                                             |
| 0,808320869 | 0,12415 | 0,716977624 | 0,0001  | PPP2CB   | protein phosphatase 2, catalytic subunit, beta isozyme                                              |
| 0,899378312 | 0,47569 | 0,790041312 | 0,01191 | PPP2R2A  | protein phosphatase 2, regulatory subunit B, alpha                                                  |
| 1,032398535 | 0,78336 | 1,240567298 | 0,0027  | PPP2R2B  | protein phosphatase 2, regulatory subunit B, beta                                                   |
| 1,00695555  | 0,96492 | 0,786724445 | 0,00288 | PPP2R3C  | protein phosphatase 2, regulatory subunit B', gamma                                                 |
| 0,72597914  | 0,38407 | 0,817335328 | 0,04026 | PPP2R5C  | protein phosphatase 2, regulatory subunit B', gamma                                                 |
| 0,839731493 | 0,29729 | 0,820741609 | 0,00947 | PPP2R5C  | protein phosphatase 2, regulatory subunit B', gamma                                                 |
| 0,935623498 | 0,73823 | 0,839149637 | 0,00649 | PPP2R5E  | protein phosphatase 2, regulatory subunit B', epsilon isoform                                       |
| 0,915099168 | 0,6604  | 0,88696305  | 0,01411 | PPP2R5E  | protein phosphatase 2, regulatory subunit B', epsilon isoform                                       |
| 0,885153765 | 0,40051 | 0,794985251 | 0,00657 | PPP3CA   | protein phosphatase 3, catalytic subunit, alpha isozyme                                             |
| 1,127400412 | 0,07294 | 1,120389214 | 0,02    | PPP3CC   | protein phosphatase 3, catalytic subunit, gamma isozyme                                             |
| 0,731028724 | 0,06362 | 0,767905135 | 0,00027 | PPP4R1   | protein phosphatase 4, regulatory subunit 1                                                         |
| 1,038139271 | 0,70564 | 1,161508732 | 0,00903 | PPP4R1L  | protein phosphatase 4, regulatory subunit 1-like                                                    |
| 0,844400887 | 0,27222 | 0,748980467 | 0,00144 | PPP4R2   | protein phosphatase 4, regulatory subunit 2                                                         |
| 1,051172909 | 0,55359 | 1,165541198 | 0,00894 | PPP5C    | protein phosphatase 5, catalytic subunit                                                            |
| 0,907519155 | 0,55106 | 0,865736566 | 0,0034  | PPP6C    | protein phosphatase 6, catalytic subunit                                                            |
| 0,897510051 | 0,56815 | 0,833931044 | 0,02272 | PPP6C    | protein phosphatase 6, catalytic subunit                                                            |
| 0,948026965 | 0,7061  | 0,906261938 | 0,02065 | PPPDE1   | PPPDE peptidase domain containing 1                                                                 |
| 0,736113431 | 0,26012 | 0,699308041 | 0,00005 | PPPDE1   | PPPDE peptidase domain containing 1                                                                 |
| 0,77271055  | 0,06317 | 0,847332435 | 0,01161 | PPPDE1   | PPPDE peptidase domain containing 1                                                                 |
| 0,773782497 | 0,17025 | 0,835666959 | 0,03106 | PPRC1    | peroxisome proliferator-activated receptor gamma, coactivator-related 1                             |
| 0,819604608 | 0,30282 | 0,811689581 | 0,00094 | PPTC7    | PTC7 protein phosphatase homolog (S. cerevisiae)                                                    |
| 0,827596816 | 0,33799 | 0,806641759 | 0,01068 | PPTC7    | PTC7 protein phosphatase homolog (S. cerevisiae)                                                    |
| 0,91319825  | 0,27472 | 0,848507902 | 0,01434 | PPWD1    | peptidylprolyl isomerase domain and WD repeat containing 1                                          |
| 1,090507733 | 0,29417 | 1,132883885 | 0,03461 | PPY2     | pancreatic polypeptide 2                                                                            |
| 1,251796459 | 0,05003 | 1,225185332 | 0,00004 | PQLC3    | PQ loop repeat containing 3                                                                         |
| 0,982139595 | 0,90385 | 1,137605228 | 0,03028 | PRADC1   | protease-associated domain containing 1                                                             |
| 1,189207115 | 0,06881 | 1,220946513 | 0,00006 | PRAMEF10 | PRAME family member 10                                                                              |
| 0,959264119 | 0,68708 | 1,174461971 | 0,02571 | PRAP1    | proline-rich acidic protein 1                                                                       |
| 1,053361036 | 0,76521 | 1,319507911 | 0,00076 | PRB1     | proline-rich protein BstNI subfamily 1                                                              |
| 1,157490217 | 0,39098 | 1,219255094 | 0,00593 | PRB1     | proline-rich protein BstNI subfamily 1                                                              |
| 1,094293701 | 0,51144 | 1,279872414 | 0,00024 | PRB1     | proline-rich protein BstNI subfamily 1                                                              |
| 1,115739322 | 0,29537 | 1,215036792 | 0,00449 | PRB4     | proline-rich protein BstNI subfamily 4                                                              |
| 1,114966219 | 0,28616 | 1,181811547 | 0,01108 | PRCD     | progressive rod-cone degeneration                                                                   |
| 1,20163605  | 0,09224 | 1,204137381 | 0,01227 | PRCD     | progressive rod-cone degeneration                                                                   |
| 1,339783602 | 0,22085 | 1,424050196 | 0,00139 | PRDM1    | PR domain containing 1, with ZNF domain                                                             |
| 0,824733549 | 0,40499 | 0,775930854 | 0,00177 | PRDM10   | PR domain containing 10                                                                             |
| 0,976031761 | 0,88236 | 1,098854218 | 0,03434 | PRDM15   | PR domain containing 15                                                                             |
| 0,992404375 | 0,95351 | 0,868742185 | 0,02847 | PRDM2    | PR domain containing 2, with ZNF domain                                                             |
| 0,905006463 | 0,42848 | 0,852044095 | 0,00139 | PRDM4    | PR domain containing 4                                                                              |
| 0,857376037 | 0,28306 | 0,812252396 | 0,00016 | PRDM4    | PR domain containing 4                                                                              |
| 1,100378609 | 0,27773 | 1,099616149 | 0,03088 | PRDM9    | PR domain containing 9                                                                              |
| 0,578745108 | 0,08227 | 0,879649076 | 0,02138 | PRDX2    | peroxiredoxin 2                                                                                     |
| 0,709561678 | 0,05418 | 0,859160755 | 0,04076 | PRELID1  | PRELI domain containing 1                                                                           |
| 1,078480432 | 0,34052 | 1,124278924 | 0,01845 | PRELID2  | PRELI domain containing 2                                                                           |
| 1,049716684 | 0,62916 | 1,188383105 | 0,01016 | PRELP    | proline/arginine-rich end leucine-rich repeat protein                                               |
| 1,125058485 | 0,19934 | 0,84264683  | 0,0173  | PREP     | prolyl endopeptidase                                                                                |
| 0,74277646  | 0,14742 | 0,863938187 | 0,01756 | PREPL    | prolyl endopeptidase-like                                                                           |
| 1,108800644 | 0,2153  | 0,863339559 | 0,03995 | PRG2     | proteoglycan 2, bone marrow (natural killer cell activator, eosinophil granule major basic protein) |
| 0,931740429 | 0,66929 | 1,164733586 | 0,04053 | PRIC285  | peroxisomal proliferator-activated receptor A interacting complex 285                               |
| 1,02313747  | 0,85802 | 1,126619228 | 0,04964 | PRIC285  | peroxisomal proliferator-activated receptor A interacting complex 285                               |
| 0,982820599 | 0,84478 | 1,123499903 | 0,03829 | PRINS    | psoriasis associated RNA induced by stress (non-protein coding)                                     |
| 0,778624691 | 0,30794 | 0,881480158 | 0,04982 | PRKAB2   | protein kinase, AMP-activated, beta 2 non-catalytic subunit                                         |
| 0,742261785 | 0,22506 | 0,822450069 | 0,00875 | PRKAB2   | protein kinase, AMP-activated, beta 2 non-catalytic subunit                                         |
| 1,219255094 | 0,08969 | 1,175276328 | 0,01821 | PRKACB   | protein kinase, cAMP-dependent, catalytic, beta                                                     |
| 1,099616149 | 0,27744 | 1,107264584 | 0,01738 | PRKAG2   | protein kinase, AMP-activated, gamma 2 non-catalytic subunit                                        |
| 0,81056512  | 0,28982 | 0,828170661 | 0,00234 | PRKAR2A  | protein kinase, cAMP-dependent, regulatory, type II, alpha                                          |
| 1,107264584 | 0,28171 | 1,139183377 | 0,0222  | PRKCB    | protein kinase C, beta                                                                              |
| 1,003471749 | 0,98888 | 1,222640278 | 0,0113  | PRKCD    | protein kinase C, delta                                                                             |
| 0,97874165  | 0,86797 | 1,111108729 | 0,02371 | PRKCE    | protein kinase C, epsilon                                                                           |
| 1,096571589 | 0,20084 | 1,124278924 | 0,01518 | PRKCG    | protein kinase C, gamma                                                                             |
| 0,84323111  | 0,51413 | 0,728499557 | 0,00023 | PRKCI    | protein kinase C, iota                                                                              |
| 0,715984371 | 0,14537 | 0,802181166 | 0,01706 | PRKCI    | protein kinase C, iota                                                                              |
| 1,107264584 | 0,48259 | 1,25353302  | 0,01192 | PRKCSH   | protein kinase C substrate 80K-H                                                                    |
| 1,244874235 | 0,39116 | 1,257884972 | 0,02717 | PRKD2    | protein kinase D2                                                                                   |
| 1,237990291 | 0,39338 | 1,255271991 | 0,01868 | PRKD2    | protein kinase D2                                                                                   |
| 1,105730653 | 0,43353 | 1,134455485 | 0,0238  | PRKD3    | protein kinase D3                                                                                   |
| 0,85797053  | 0,62931 | 0,69640574  | 0,00413 | PRKRA    | protein kinase, interferon-inducible double stranded RNA dependent activator                        |
| 0,740719899 | 0,19604 | 0,870550563 | 0,04066 | PRKXP1   | protein kinase, X-linked, pseudogene 1                                                              |
| 0,873572896 | 0,17189 | 0,782411782 | 0,00702 | PRKY     | protein kinase, Y-linked                                                                            |
| 0,905006463 | 0,38181 | 0,807201075 | 0,01275 | PRMT10   | protein arginine methyltransferase 10 (putative)                                                    |
| 0,953959551 | 0,78534 | 1,159899655 | 0,00948 | PRMT2    | protein arginine methyltransferase 2                                                                |
| 0,814507563 | 0,11632 | 0,818469182 | 0,00669 | PRMT2    | protein arginine methyltransferase 2                                                                |

|             |         |             |         |           |                                                                                           |
|-------------|---------|-------------|---------|-----------|-------------------------------------------------------------------------------------------|
| 0,723969086 | 0,20723 | 0,631563631 | 0,00026 | PRMT3     | protein arginine methyltransferase 3                                                      |
| 1,138394029 | 0,37968 | 0,817902059 | 0,00021 | PRMT5     | protein arginine methyltransferase 5                                                      |
| 0,916368645 | 0,53655 | 0,978851916 | 0,03734 | PRMT6     | protein arginine methyltransferase 6                                                      |
| 0,825305409 | 0,22926 | 0,828744904 | 0,00836 | PRNP      | prion protein                                                                             |
| 1,147902414 | 0,21987 | 1,173648178 | 0,00449 | PRO1768   | PRO1768                                                                                   |
| 0,979420298 | 0,88063 | 1,320422841 | 0,00962 | PRODH     | proline dehydrogenase (oxidase) 1                                                         |
| 1,137605228 | 0,09011 | 1,108800644 | 0,04245 | PROK1     | prokineticin 1                                                                            |
| 1,136029265 | 0,3139  | 1,164733586 | 0,02822 | PROL1     | proline rich, lacrimal 1                                                                  |
| 0,957271458 | 0,65457 | 1,172022284 | 0,011   | PROP1     | PROP paired-like homeobox 1                                                               |
| 1,207480591 | 0,14864 | 1,180992661 | 0,0136  | ProSAPIP1 | ProSAPIP1 protein                                                                         |
| 0,89564567  | 0,77904 | 1,147107024 | 0,0345  | PROSC     | proline synthetase co-transcribed homolog (bacterial)                                     |
| 0,735093668 | 0,07498 | 0,712518807 | 0,0003  | PROSER1   | proline and serine rich 1                                                                 |
| 1,159899655 | 0,24712 | 1,100378609 | 0,02524 | PRPF18    | PRP18 pre-mRNA processing factor 18 homolog (S. cerevisiae)                               |
| 0,938221197 | 0,70076 | 0,855595026 | 0,02645 | PRPF38B   | PRP38 pre-mRNA processing factor 38 (yeast) domain containing B                           |
| 1,012554807 | 0,96898 | 0,745355193 | 0,00116 | PRPF38B   | PRP38 pre-mRNA processing factor 38 (yeast) domain containing B                           |
| 0,722465199 | 0,12479 | 0,737134609 | 0,00674 | PRPF39    | PRP39 pre-mRNA processing factor 39 homolog (S. cerevisiae)                               |
| 0,863938187 | 0,28465 | 0,844986384 | 0,00353 | PRPF4     | PRP4 pre-mRNA processing factor 4 homolog (yeast)                                         |
| 0,577943353 | 0,17738 | 0,767905135 | 0,0003  | PRPF4     | PRP4 pre-mRNA processing factor 4 homolog (yeast)                                         |
| 0,670356296 | 0,31733 | 0,762072415 | 0,00006 | PRPF40A   | PRP40 pre-mRNA processing factor 40 homolog A (S. cerevisiae)                             |
| 0,824733549 | 0,40293 | 0,759962428 | 0,00015 | PRPF40A   | PRP40 pre-mRNA processing factor 40 homolog A (S. cerevisiae)                             |
| 0,658383461 | 0,07371 | 0,734075318 | 0,00002 | PRPF40A   | PRP40 pre-mRNA processing factor 40 homolog A (S. cerevisiae)                             |
| 0,757858283 | 0,23977 | 0,829894586 | 0,00095 | PRPF4B    | PRP4 pre-mRNA processing factor 4 homolog B (yeast)                                       |
| 0,780786493 | 0,2204  | 0,787853886 | 0,01163 | PRPF4B    | PRP4 pre-mRNA processing factor 4 homolog B (yeast)                                       |
| 1,030968319 | 0,80621 | 1,144724161 | 0,00362 | PRPF4B    | PRP4 pre-mRNA processing factor 4 homolog B (yeast)                                       |
| 0,983502074 | 0,88619 | 1,209155676 | 0,00867 | PRPH      | peripherin                                                                                |
| 1,127400412 | 0,16642 | 1,121166078 | 0,04574 | PRPS1     | phosphoribosyl pyrophosphate synthetase 1                                                 |
| 0,892546971 | 0,59524 | 0,813379198 | 0,00306 | PRPS2     | phosphoribosyl pyrophosphate synthetase 2                                                 |
| 0,821310701 | 0,05662 | 0,827023368 | 0,00609 | PRPSAP2   | phosphoribosyl pyrophosphate synthetase-associated protein 2                              |
| 1,071030823 | 0,53653 | 1,159899655 | 0,01041 | PRR14     | proline rich 14                                                                           |
| 0,789493887 | 0,08294 | 0,865136691 | 0,00141 | PRR14L    | proline rich 14-like                                                                      |
| 1,052631155 | 0,71594 | 0,877821798 | 0,027   | PRR14L    | proline rich 14-like                                                                      |
| 1,151887642 | 0,09238 | 1,205807828 | 0,01777 | PRR16     | proline rich 16                                                                           |
| 1,237132479 | 0,08047 | 1,256142381 | 0,001   | PRR3      | proline rich 3                                                                            |
| 1,07997656  | 0,44038 | 0,922103118 | 0,01554 | PRR4      | proline rich 4 (lacrimal)                                                                 |
| 1,237990291 | 0,06106 | 1,199139914 | 0,03574 | PRR5      | proline rich 5 (renal)                                                                    |
| 1,429984986 | 0,10459 | 1,151887642 | 0,04333 | PRR5L     | proline rich 5 like                                                                       |
| 1,016774673 | 0,77245 | 1,106497353 | 0,01269 | PRR5L     | proline rich 5 like                                                                       |
| 1,162314108 | 0,08678 | 1,118837101 | 0,00846 | PRRC2B    | proline-rich coiled-coil 2B                                                               |
| 0,524131238 | 0,11462 | 0,633317127 | 0       | PRRC2C    | proline-rich coiled-coil 2C                                                               |
| 0,883315051 | 0,51492 | 0,868140228 | 0,00439 | PRRC2C    | proline-rich coiled-coil 2C                                                               |
| 0,692074858 | 0,16093 | 0,846745312 | 0,02552 | PRRC2C    | proline-rich coiled-coil 2C                                                               |
| 0,619424349 | 0,0539  | 0,658383461 | 0,00401 | PRRC2C    | proline-rich coiled-coil 2C                                                               |
| 1,038139271 | 0,71407 | 1,184271612 | 0,0007  | PRRG3     | proline rich Gla (G-carboxyglutamic acid) 3 (transmembrane)                               |
| 0,598324482 | 0,17161 | 0,717474767 | 0,00074 | PRRG4     | proline rich Gla (G-carboxyglutamic acid) 4 (transmembrane)                               |
| 1,130530567 | 0,41737 | 1,140763716 | 0,0333  | PRRT1     | proline-rich transmembrane protein 1                                                      |
| 1,217566019 | 0,10793 | 1,235418637 | 0,02796 | PRSS22    | protease, serine, 22                                                                      |
| 1,053361036 | 0,59985 | 1,209994089 | 0,04734 | PRSS23    | protease, serine, 23                                                                      |
| 1,25092908  | 0,07675 | 1,354724977 | 0,00009 | PRSS33    | protease, serine, 33                                                                      |
| 1,090507733 | 0,25458 | 1,264879542 | 0,00013 | PRSS47    | protease, serine, 47                                                                      |
| 1,194991205 | 0,07317 | 1,145517898 | 0,00932 | PRSS53    | protease, serine, 53                                                                      |
| 1,17772279  | 0,24942 | 1,160703914 | 0,00766 | PRSS58    | protease, serine, 58                                                                      |
| 1,234562607 | 0,06285 | 1,165541198 | 0,00318 | PRTG      | protogenin                                                                                |
| 1,412254404 | 0,05044 | 1,172834949 | 0,01563 | PRTG      | protogenin                                                                                |
| 1,073260286 | 0,4013  | 1,125058485 | 0,01066 | PRTN3     | proteinase 3                                                                              |
| 1,185092771 | 0,71213 | 1,345367209 | 0,00045 | PSAP      | prosaposin                                                                                |
| 1,139183377 | 0,53311 | 1,321338406 | 0,00005 | PSAP      | prosaposin                                                                                |
| 1,041743429 | 0,62792 | 1,350037985 | 0,00004 | PSAPL1    | prosaposin-like 1 (gene/pseudogene)                                                       |
| 1,132883885 | 0,14159 | 1,140763716 | 0,04232 | PSD2      | pleckstrin and Sec7 domain containing 2                                                   |
| 0,743806881 | 0,14708 | 0,674083866 | 0,00066 | PSD3      | pleckstrin and Sec7 domain containing 3                                                   |
| 0,718968266 | 0,07577 | 0,733058379 | 0,00087 | PSD3      | pleckstrin and Sec7 domain containing 3                                                   |
| 1,107264584 | 0,30164 | 1,286989247 | 0,00007 | PSG11     | pregnancy specific beta-1-glycoprotein 11                                                 |
| 1,065108203 | 0,47938 | 1,143930973 | 0,0247  | PSG2      | pregnancy specific beta-1-glycoprotein 2                                                  |
| 1,116512962 | 0,31115 | 1,172022284 | 0,01609 | PSG9      | pregnancy specific beta-1-glycoprotein 9                                                  |
| 1,118837101 | 0,31108 | 1,264003098 | 0,0016  | psiTPE22  | TPE pseudogene                                                                            |
| 0,755759964 | 0,0984  | 0,785672517 | 0,00181 | PSMA2     | proteasome (prosome, macropain) subunit, alpha type, 2                                    |
| 0,656560563 | 0,20369 | 0,828744904 | 0,03919 | PSMA3     | proteasome (prosome, macropain) subunit, alpha type, 3                                    |
| 0,932386486 | 0,35924 | 0,637280314 | 0       | PSMA3     | proteasome (prosome, macropain) subunit, alpha type, 3                                    |
| 0,937571096 | 0,79028 | 0,722966147 | 0,00003 | PSMA5     | proteasome (prosome, macropain) subunit, alpha type, 5                                    |
| 0,829894586 | 0,11212 | 0,843815796 | 0,00267 | PSMA6     | proteasome (prosome, macropain) subunit, alpha type, 6                                    |
| 1,060687741 | 0,66702 | 1,427014506 | 0,00063 | PSMB2     | proteasome (prosome, macropain) subunit, beta type, 2                                     |
| 0,943438251 | 0,76448 | 0,802181166 | 0,02572 | PSMB7     | proteasome (prosome, macropain) subunit, beta type, 7                                     |
| 1,278985581 | 0,14479 | 0,319507911 | 0,00099 | PSMB9     | proteasome (prosome, macropain) subunit, beta type, 9 (large multifunctional peptidase 2) |
| 0,85027416  | 0,20298 | 0,844986384 | 0,00335 | PSMC2     | proteasome (prosome, macropain) 26S subunit, ATPase, 2                                    |
| 0,926588062 | 0,74237 | 0,66158572  | 0,00155 | PSMC2     | proteasome (prosome, macropain) 26S subunit, ATPase, 2                                    |
| 0,744838732 | 0,07232 | 0,748980467 | 0,00069 | PSMC3IP   | PSMC3 interacting protein                                                                 |
| 0,786762445 | 0,20673 | 0,740719899 | 0,00138 | PSMC6     | proteasome (prosome, macropain) 26S subunit, ATPase, 6                                    |
| 0,610896551 | 0,07072 | 0,860949188 | 0,00313 | PSMD1     | proteasome (prosome, macropain) 26S subunit, non-ATPase, 1                                |
| 0,788946841 | 0,09422 | 0,820741609 | 0,04614 | PSMD10    | proteasome (prosome, macropain) 26S subunit, non-ATPase, 10                               |
| 0,879039561 | 0,37258 | 0,782411782 | 0,00157 | PSMD11    | proteasome (prosome, macropain) 26S subunit, non-ATPase, 11                               |
| 0,574349177 | 0,12168 | 0,784584098 | 0,00111 | PSMD11    | proteasome (prosome, macropain) 26S subunit, non-ATPase, 11                               |
| 0,832198735 | 0,13819 | 0,770571108 | 0,01027 | PSMD12    | proteasome (prosome, macropain) 26S subunit, non-ATPase, 12                               |
| 0,723467443 | 0,0827  | 0,650220073 | 0,00057 | PSMD12    | proteasome (prosome, macropain) 26S subunit, non-ATPase, 12                               |
| 0,773246337 | 0,09121 | 0,744322628 | 0       | PSMD14    | proteasome (prosome, macropain) 26S subunit, non-ATPase, 14                               |
| 0,655196702 | 0,07953 | 0,87417862  | 0,01168 | PSMD2     | proteasome (prosome, macropain) 26S subunit, non-ATPase, 14                               |
| 0,736623843 | 0,0636  | 0,821310701 | 0,00152 | PSMD5     | proteasome (prosome, macropain) 26S subunit, non-ATPase, 5                                |
| 0,936272247 | 0,71152 | 1,197478705 | 0,01656 | PSME2     | proteasome (prosome, macropain) activator subunit 2 (PA28 beta)                           |
| 0,687770909 | 0,07933 | 0,747942879 | 0,00177 | PSME3     | proteasome (prosome, macropain) activator subunit 3 (PA28 gamma; Ki)                      |
| 1,026689546 | 0,86182 | 0,779704843 | 0,04083 | PSME4     | proteasome (prosome, macropain) activator subunit 4                                       |
| 0,821880187 | 0,0712  | 0,852634892 | 0,00726 | PSMG2     | proteasome (prosome, macropain) assembly chaperone 2                                      |
| 0,967947027 | 0,70751 | 0,756808396 | 0,00007 | PSMG4     | proteasome (prosome, macropain) assembly chaperone 4                                      |
| 1,268391399 | 0,07111 | 1,143138335 | 0,04119 | PSPC1     | paraspeckle component 1                                                                   |
| 1,068805991 | 0,65324 | 0,81056512  | 0,01049 | PSPC1     | paraspeckle component 1                                                                   |
| 1,128964405 | 0,19863 | 1,250062303 | 0,00412 | PSRC1     | proline/serine-rich coiled-coil 1                                                         |
| 0,858565436 | 0,26483 | 0,751580739 | 0,00359 | PSTK      | phosphoserine-threonine kinase                                                            |
| 1,059218335 | 0,62251 | 1,436940177 | 0,00037 | PSTPIP1   | proline-serine-threonine phosphatase interacting protein 1                                |
| 1,315854525 | 0,07058 | 1,387030969 | 0,0016  | PTAFR     | platelet-activating factor receptor                                                       |
| 0,867538687 | 0,52688 | 0,793883931 | 0,02952 | PTAR1     | protein prenyltransferase alpha subunit repeat containing 1                               |
| 1,158292806 | 0,21341 | 1,149494848 | 0,03885 | PTBP1     | polypyrimidine tract binding protein 1                                                    |
| 0,90312651  | 0,63136 | 0,750539549 | 0,00025 | PTCD2     | pentatricopeptide repeat domain 2                                                         |
| 0,736623843 | 0,06386 | 0,753667455 | 0,00149 | PTCD2     | pentatricopeptide repeat domain 2                                                         |
| 0,832198735 | 0,07306 | 0,85027416  | 0,02742 | PTCD3     | Pentatricopeptide repeat domain 3                                                         |
| 1,161508732 | 0,08972 | 1,085981856 | 0,03903 | PTCH2     | patched 2                                                                                 |
| 1,125058485 | 0,19294 | 1,221793102 | 0,0037  | PTCHD2    | patched domain containing 2                                                               |
| 1,087488391 | 0,4417  | 1,123499903 | 0,03839 | PTCHD2    | patched domain containing 2                                                               |

|             |         |             |         |           |                                                                                              |
|-------------|---------|-------------|---------|-----------|----------------------------------------------------------------------------------------------|
| 1,093535457 | 0,44533 | 1,128182137 | 0,01646 | PTCRA     | pre T-cell antigen receptor alpha                                                            |
| 0,782411782 | 0,09282 | 0,84323111  | 0,02617 | PTEN      | phosphatase and tensin homolog                                                               |
| 0,820172911 | 0,39801 | 0,768437591 | 0,00429 | PTEN      | phosphatase and tensin homolog                                                               |
| 0,604158922 | 0,20722 | 0,61985385  | 0,00012 | PTEN      | phosphatase and tensin homolog                                                               |
| 1,073260286 | 0,65528 | 0,804408371 | 0,00609 | PTEN      | phosphatase and tensin homolog                                                               |
| 1,143138335 | 0,06107 | 1,110338834 | 0,03992 | PTGDR     | prostaglandin D2 receptor (DP)                                                               |
| 1,429984986 | 0,11883 | 1,788809804 | 0,00029 | PTGDS     | prostaglandin D2 synthase 21kDa (brain)                                                      |
| 1,633537982 | 0,10218 | 2,171963713 | 0,00012 | PTGDS     | prostaglandin D2 synthase 21kDa (brain)                                                      |
| 1,62113024  | 0,14693 | 2,02791896  | 0,00028 | PTGDS     | prostaglandin D2 synthase 21kDa (brain)                                                      |
| 0,780786493 | 0,35635 | 0,821310701 | 0,00924 | PTGER3    | prostaglandin E receptor 3 (subtype EP3)                                                     |
| 0,825877665 | 0,09765 | 0,889458994 | 0,03886 | PTGER3    | prostaglandin E receptor 3 (subtype EP3)                                                     |
| 1,025267238 | 0,83421 | 1,176906737 | 0,02158 | PTGER4    | prostaglandin E receptor 4 (subtype EP4)                                                     |
| 1,056285625 | 0,45367 | 1,101905116 | 0,04749 | PTGES     | prostaglandin E synthase                                                                     |
| 0,815072332 | 0,11358 | 0,771640088 | 0,00007 | PTGFRN    | prostaglandin F2 receptor negative regulator                                                 |
| 1,148698355 | 0,11797 | 1,237132479 | 0,00428 | PTGIR     | prostaglandin I2 (prostacyclin) receptor (IP)                                                |
| 1,160703914 | 0,20503 | 1,173648178 | 0,04931 | PTGIR     | prostaglandin I2 (prostacyclin) receptor (IP)                                                |
| 1,150291893 | 0,42301 | 0,853226098 | 0,01232 | PTGR2     | prostaglandin reductase 2                                                                    |
| 0,903752727 | 0,48687 | 0,846158597 | 0,04868 | PTGS1     | prostaglandin-endoperoxide synthase 1 (prostaglandin G/H synthase and cyclooxygenase)        |
| 1,129747215 | 0,2532  | 1,213353556 | 0,00223 | PTH2      | parathyroid hormone 2                                                                        |
| 0,704172113 | 0,14407 | 0,800514811 | 0,00724 | PTMA      | prothymosin, alpha                                                                           |
| 0,683493726 | 0,2608  | 0,805524291 | 0,00746 | PTMA      | prothymosin, alpha                                                                           |
| 0,967947027 | 0,81716 | 1,189207115 | 0,01068 | PTP4A2    | protein tyrosine phosphatase type IVA, member 2                                              |
| 1,110338834 | 0,77096 | 1,222640278 | 0,00458 | PTP4A2    | protein tyrosine phosphatase type IVA, member 2                                              |
| 0,692554734 | 0,08211 | 0,711531731 | 0,00006 | PTPLB     | protein tyrosine phosphatase-like (proline instead of catalytic arginine), member b          |
| 0,667111585 | 0,11906 | 0,713507253 | 0,01853 | PTPLB     | protein tyrosine phosphatase-like (proline instead of catalytic arginine), member b          |
| 0,814507563 | 0,18361 | 0,867538687 | 0,00165 | PTPMT1    | protein tyrosine phosphatase, mitochondrial 1                                                |
| 0,849684999 | 0,34468 | 0,874784765 | 0,02344 | PTPMT1    | protein tyrosine phosphatase, mitochondrial 1                                                |
| 1,118061851 | 0,39067 | 1,143930973 | 0,01308 | PTPN1     | protein tyrosine phosphatase, non-receptor type 1                                            |
| 0,490389502 | 0,07405 | 0,672683604 | 0,00862 | PTPN11    | protein tyrosine phosphatase, non-receptor type 11                                           |
| 0,7944344   | 0,2352  | 0,747942879 | 0,00088 | PTPN11    | protein tyrosine phosphatase, non-receptor type 11                                           |
| 0,787853886 | 0,37812 | 0,822450069 | 0,02179 | PTPN13    | protein tyrosine phosphatase, non-receptor type 13 (APO-1/CD95 (Fas)-associated phosphatase) |
| 0,97063447  | 0,8434  | 1,283425898 | 0,00667 | PTPN18    | protein tyrosine phosphatase, non-receptor type 18 (brain-derived)                           |
| 0,676424116 | 0,12283 | 0,807201075 | 0,00064 | PTPN2     | protein tyrosine phosphatase, non-receptor type 2                                            |
| 1,048262476 | 0,52594 | 1,102669163 | 0,01985 | PTPN2     | protein tyrosine phosphatase, non-receptor type 2                                            |
| 1,104964485 | 0,11976 | 1,215036792 | 0,00655 | PTPN22    | protein tyrosine phosphatase, non-receptor type 22 (lymphoid)                                |
| 0,743291492 | 0,05719 | 0,795536484 | 0,00047 | PTPN4     | protein tyrosine phosphatase, non-receptor type 4 (megakaryocyte)                            |
| 1,289668251 | 0,16824 | 1,295042999 | 0,00372 | PTPN6     | protein tyrosine phosphatase, non-receptor type 6                                            |
| 1,129747215 | 0,23396 | 1,124278924 | 0,0205  | PTPN7     | protein tyrosine phosphatase, non-receptor type 7                                            |
| 1,071030823 | 0,42985 | 1,157490217 | 0,00726 | PTPRB     | protein tyrosine phosphatase, receptor type, B                                               |
| 1,234562607 | 0,08446 | 1,255271991 | 0,0078  | PTPRB     | protein tyrosine phosphatase, receptor type, B                                               |
| 0,87417862  | 0,556   | 0,794985251 | 0,04994 | PTPRE     | B protein tyrosine phosphatase, receptor type, E                                             |
| 1,170398641 | 0,21139 | 1,301341855 | 0,00197 | PTPRG     | protein tyrosine phosphatase, receptor type, G                                               |
| 1,505246747 | 0,12925 | 1,247465572 | 0,00851 | PTPRG     | protein tyrosine phosphatase, receptor type, G                                               |
| 1,370782805 | 0,13566 | 1,338855257 | 0,00263 | PTPRG     | protein tyrosine phosphatase, receptor type, G                                               |
| 0,958599438 | 0,76759 | 1,359428242 | 0,00288 | PTPRG     | protein tyrosine phosphatase, receptor type, G                                               |
| 1,127400412 | 0,25328 | 1,095052471 | 0,04443 | PTPRJ     | G protein tyrosine phosphatase, receptor type, J                                             |
| 1,470187336 | 0,08514 | 1,271913007 | 0,01207 | PTPRM     | J protein tyrosine phosphatase, receptor type, M                                             |
| 1,040300267 | 0,61259 | 1,164733586 | 0,01604 | PTPRN2    | protein tyrosine phosphatase, receptor type, N polypeptide 2                                 |
| 1,042465761 | 0,64702 | 1,203303026 | 0,00348 | PTPRN2    | protein tyrosine phosphatase, receptor type, N polypeptide 2                                 |
| 0,984184022 | 0,816   | 1,094293701 | 0,03809 | PTPRR     | protein tyrosine phosphatase, receptor type, R                                               |
| 1,109569472 | 0,23862 | 1,267512522 | 0,00477 | PTPRT     | protein tyrosine phosphatase, receptor type, T                                               |
| 0,632878297 | 0,07606 | 0,547905883 | 0,00006 | PTPRZ1    | protein tyrosine phosphatase, receptor-type, Z polypeptide 1                                 |
| 0,819604608 | 0,09788 | 0,89688816  | 0,02913 | PTRH2     | peptidyl-tRNA hydrolase 2                                                                    |
| 0,831045862 | 0,10017 | 0,829894586 | 0,00685 | PTRHD1    | peptidyl-tRNA hydrolase domain containing 1                                                  |
| 0,802181166 | 0,05763 | 0,845572287 | 0,01783 | PTS       | 6-pyruvoyltetrahydropterin synthase                                                          |
| 1,01325269  | 0,83591 | 1,146312186 | 0,00838 | PTTG3P    | pituitary tumor-transforming 3, pseudogene                                                   |
| 0,817335328 | 0,23265 | 0,778085177 | 0,001   | PURA      | purine-rich element binding protein A                                                        |
| 0,995849753 | 0,97776 | 0,821880187 | 0,02127 | PURB      | purine-rich element binding protein B                                                        |
| 0,828170661 | 0,2489  | 0,87417862  | 0,03315 | PUS1      | pseudouridylate synthase 1                                                                   |
| 1,067325338 | 0,53757 | 0,86934456  | 0,02584 | PUS3      | pseudouridylate synthase 3                                                                   |
| 0,597081594 | 0,0684  | 0,622005827 | 0,00002 | PUS7      | pseudouridylate synthase 7 homolog (S. cerevisiae)                                           |
| 0,997922719 | 0,98642 | 1,120389214 | 0,03998 | PVR       | poliovirus receptor                                                                          |
| 1,358486285 | 0,06309 | 1,284315809 | 0,00663 | PVRIG     | poliovirus receptor related immunoglobulin domain containing                                 |
| 1,047536127 | 0,7083  | 1,137605228 | 0,00668 | PVRL1     | poliovirus receptor-related 1 (herpesvirus entry mediator C)                                 |
| 1,207480591 | 0,11999 | 1,196648963 | 0,00118 | PVRL2     | poliovirus receptor-related 2 (herpesvirus entry mediator B)                                 |
| 0,959929261 | 0,62595 | 1,162314108 | 0,02032 | PVRL3-AS1 | PVRL3 antisense RNA 1 (non-protein coding)                                                   |
| 0,826450318 | 0,36487 | 0,744838732 | 0,00004 | PWP1      | PWP1 homolog (S. cerevisiae)                                                                 |
| 1,122721422 | 0,33851 | 1,147902414 | 0,0074  | PWP2      | PWP2 periodic tryptophan protein homolog (yeast)                                             |
| 0,835666959 | 0,27295 | 0,84323111  | 0,00391 | PWP2      | PWP2 periodic tryptophan protein homolog (yeast)                                             |
| 0,803293997 | 0,18063 | 0,816203046 | 0,00692 | PWWP2A    | PWWP domain containing 2A                                                                    |
| 0,85797053  | 0,25749 | 0,853226098 | 0,03928 | PXMP4     | peroxisomal membrane protein 4, 24kDa                                                        |
| 1,250062303 | 0,05283 | 1,278985581 | 0,00465 | PYCR1     | pyrroline-5-carboxylate reductase 1                                                          |
| 1,209994089 | 0,39985 | 1,244011653 | 0,00546 | PYCR2     | pyrroline-5-carboxylate reductase family, member 2                                           |
| 1,066585781 | 0,64132 | 1,178539408 | 0,00591 | PYCR1     | pyrroline-5-carboxylate reductase-like                                                       |
| 1,222640278 | 0,14822 | 1,179356592 | 0,02445 | PYGB      | phosphorylase, glycogen; brain                                                               |
| 1,01395948  | 0,89308 | 1,21335356  | 0,00305 | PYGM      | phosphorylase, glycogen, muscle                                                              |
| 1,153485605 | 0,08649 | 1,250062303 | 0,00101 | PYHIN1    | pyrin and HIN domain family, member 1                                                        |
| 0,736623843 | 0,07704 | 0,767905135 | 0,00593 | PYROXD1   | pyridine nucleotide-disulphide oxidoreductase domain 1                                       |
| 1,217566019 | 0,17644 | 1,180174343 | 0,03214 | PYROXD2   | pyridine nucleotide-disulphide oxidoreductase domain 2                                       |
| 1,132098902 | 0,41879 | 1,190031696 | 0,01112 | PYY2      | peptide YY, 2 (seminalplasmin)                                                               |
| 1,125838586 | 0,23638 | 1,191682575 | 0,00851 | PZP       | pregnancy-zone protein                                                                       |
| 1,079228237 | 0,41514 | 1,134455485 | 0,01469 | QDPR      | quinoid dihydropteridine reductase                                                           |
| 0,932386486 | 0,36179 | 0,918276162 | 0,04534 | QDPR      | quinoid dihydropteridine reductase                                                           |
| 1,22858698  | 0,25388 | 0,874784765 | 0,03335 | QKI       | quaking homolog, KH domain RNA binding (mouse)                                               |
| 0,923382311 | 0,78362 | 0,821310701 | 0,00419 | QKI       | quaking homolog, KH domain RNA binding (mouse)                                               |
| 0,891928519 | 0,56875 | 0,854409741 | 0,01511 | QKI       | quaking homolog, KH domain RNA binding (mouse)                                               |
| 0,785128119 | 0,24731 | 0,806082831 | 0,0099  | QRS1      | glutaminyl-tRNA synthase (glutamine-hydrolyzing)-like 1                                      |
| 0,934975198 | 0,73815 | 0,889458994 | 0,04303 | QRS1      | glutaminyl-tRNA synthase (glutamine-hydrolyzing)-like 1                                      |
| 0,678302164 | 0,10761 | 0,735093668 | 0,00065 | QSER1     | glutamine and serine rich 1                                                                  |
| 0,880259014 | 0,7181  | 0,76101669  | 0,00542 | QSER1     | glutamine and serine rich 1                                                                  |
| 0,675955417 | 0,15478 | 0,561749952 | 0,00004 | QSOX1     | quiescin Q6 sulfhydryl oxidase 1                                                             |
| 0,957271458 | 0,78542 | 1,171210181 | 0,02498 | QTRT1     | queuine tRNA-ribosyltransferase 1                                                            |
| 0,90000193  | 0,40979 | 0,768437591 | 0,00133 | QTRT1     | queuine tRNA-ribosyltransferase domain containing 1                                          |
| 1,015366101 | 0,87544 | 1,17609125  | 0,00978 | R3HDM1    | R3H domain containing-like                                                                   |
| 0,785128119 | 0,13857 | 0,802737389 | 0,00022 | RAB10     | RAB10, member RAS oncogene family                                                            |
| 0,635956503 | 0,09837 | 0,656560563 | 0,00007 | RAB11A    | RAB11A, member RAS oncogene family                                                           |
| 1,102669163 | 0,47102 | 1,187559666 | 0,00929 | RAB11FIP5 | RAB11 family interacting protein 5 (class I)                                                 |
| 0,915099168 | 0,64347 | 0,713507253 | 0,00326 | RAB12     | RAB12, member RAS oncogene family                                                            |
| 0,97874165  | 0,87293 | 0,729004689 | 0,00038 | RAB14     | RAB14, member RAS oncogene family                                                            |
| 0,69640574  | 0,34266 | 0,78132788  | 0,0082  | RAB14     | RAB14, member RAS oncogene family                                                            |
| 1,144724161 | 0,08803 | 1,089752112 | 0,04867 | RAB15     | RAB15, member RAS oncogene family                                                            |
| 0,737134609 | 0,06712 | 0,752623374 | 0,00866 | RAB18     | RAB18, member RAS oncogene family                                                            |
| 0,818469182 | 0,33142 | 0,701249625 | 0,00038 | RAB18     | RAB18, member RAS oncogene family                                                            |
| 0,863339559 | 0,54934 | 0,6341957   | 0,00186 | RAB18     | RAB18, member RAS oncogene family                                                            |

|             |         |             |         |          |                                                                                         |
|-------------|---------|-------------|---------|----------|-----------------------------------------------------------------------------------------|
| 0,862143545 | 0,21257 | 0,808320869 | 0,00125 | RAB1A    | RAB1A, member RAS oncogene family                                                       |
| 0,76154437  | 0,0784  | 0,802181166 | 0,01416 | RAB21    | RAB21, member RAS oncogene family                                                       |
| 0,753145233 | 0,14239 | 0,713507253 | 0,00067 | RAB21    | RAB21, member RAS oncogene family                                                       |
| 0,732550437 | 0,12449 | 0,722966147 | 0,00071 | RAB22A   | RAB22A, member RAS oncogene family                                                      |
| 0,756808396 | 0,0959  | 0,743806881 | 0,01073 | RAB22A   | RAB22A, member RAS oncogene family                                                      |
| 0,666649339 | 0,10479 | 0,76684133  | 0,00212 | RAB27B   | RAB27B, member RAS oncogene family                                                      |
| 0,910038824 | 0,4716  | 0,826450318 | 0,01096 | RAB2A    | RAB2A, member RAS oncogene family                                                       |
| 0,951318276 | 0,75559 | 0,804966138 | 0,00047 | RAB2A    | RAB2A, member RAS oncogene family                                                       |
| 1,104964485 | 0,57044 | 0,803850991 | 0,00274 | RAB2A    | RAB2A, member RAS oncogene family                                                       |
| 0,815637493 | 0,39856 | 0,898755127 | 0,04547 | RAB2A    | RAB2A, member RAS oncogene family                                                       |
| 0,822450069 | 0,42888 | 0,729510172 | 0,03903 | RAB2A    | RAB2A, member RAS oncogene family                                                       |
| 1,079228237 | 0,61444 | 1,212512819 | 0,036   | RAB31    | RAB31, member RAS oncogene family                                                       |
| 0,964598185 | 0,92365 | 1,275444392 | 0,02663 | RAB31    | RAB31, member RAS oncogene family                                                       |
| 1,194163187 | 0,22489 | 1,192508872 | 0,04605 | RAB31    | RAB31, member RAS oncogene family                                                       |
| 1,168777249 | 0,57948 | 1,250062303 | 0,00182 | RAB34    | RAB34, member RAS oncogene family                                                       |
| 1,102669163 | 0,6136  | 1,311302014 | 0,00011 | RAB34    | RAB34, member RAS oncogene family                                                       |
| 1,093535457 | 0,38148 | 1,257884972 | 0,0102  | RAB37    | RAB37, member RAS oncogene family                                                       |
| 1,159095952 | 0,13611 | 1,159095952 | 0,00848 | RAB3B    | RAB3B, member RAS oncogene family                                                       |
| 1,147902414 | 0,15116 | 1,136029265 | 0,03813 | RAB3C    | RAB3C, member RAS oncogene family                                                       |
| 0,774855931 | 0,18949 | 0,773246337 | 0,00131 | RAB3GAP2 | RAB3 GTPase activating protein subunit 2 (non-catalytic)                                |
| 1,021012126 | 0,7787  | 0,853817714 | 0,02343 | RAB3GAP2 | RAB3 GTPase activating protein subunit 2 (non-catalytic)                                |
| 0,853087919 | 0,3611  | 0,790041312 | 0,0397  | RAB3GAP2 | RAB3 GTPase activating protein subunit 2 (non-catalytic)                                |
| 1,151887642 | 0,09326 | 1,278985581 | 0,00383 | RAB3L1   | RAB3A interacting protein (rabin3)-like 1                                               |
| 0,903752727 | 0,42301 | 0,791685866 | 0,00039 | RAB40B   | RAB40B, member RAS oncogene family                                                      |
| 0,901250463 | 0,28193 | 0,863339559 | 0,02492 | RAB40C   | RAB40C, member RAS oncogene family                                                      |
| 0,636397468 | 0,11987 | 0,720464874 | 0,01518 | RAB4A    | RAB4A, member RAS oncogene family                                                       |
| 1,264003098 | 0,17755 | 1,376495602 | 0,00334 | RAB4B    | RAB4B, member RAS oncogene family                                                       |
| 0,717972255 | 0,17157 | 0,767373048 | 0,0044  | RAB5A    | RAB5A, member RAS oncogene family                                                       |
| 1,270150983 | 0,30781 | 1,354724977 | 0,0004  | RAB5C    | RAB5C, member RAS oncogene family                                                       |
| 0,969289817 | 0,72024 | 0,901250463 | 0,04834 | RAB6A    | RAB6A, member RAS oncogene family                                                       |
| 0,697371833 | 0,05908 | 0,854409741 | 0,00218 | RAB6A    | RAB6A, member RAS oncogene family                                                       |
| 1,320422841 | 0,41054 | 1,456999114 | 0,0003  | RAB7L1   | RAB7, member RAS oncogene family-like 1                                                 |
| 1,514666316 | 0,058   | 1,20664392  | 0,01704 | RAB8B    | RAB8B, member RAS oncogene family                                                       |
| 1,121166078 | 0,74213 | 1,515716567 | 0       | RABAC1   | Rab acceptor 1 (prenylated)                                                             |
| 0,924663278 | 0,51083 | 0,844986384 | 0,02653 | RABEP1   | rabaptin, RAB GTPase binding effector protein 1                                         |
| 1,086734863 | 0,38059 | 1,174461971 | 0,03087 | RABEP2   | rabaptin, RAB GTPase binding effector protein 2                                         |
| 0,856188285 | 0,18671 | 0,871154192 | 0,0034  | RABEPK   | Rab9 effector protein with kelch motifs                                                 |
| 0,704172113 | 0,11152 | 0,852634892 | 0,00643 | RABGAP1  | RAB GTPase activating protein 1                                                         |
| 0,731028724 | 0,236   | 0,604997045 | 0,00008 | RABGAP1L | RAB GTPase activating protein 1-like                                                    |
| 0,806641759 | 0,25016 | 0,746389192 | 0,00469 | RAC1     | ras-related C3 botulinum toxin substrate 1 (rho family, small GTP binding protein Rac1) |
| 0,865136691 | 0,76933 | 0,746906729 | 0,0167  | RAC1     | ras-related C3 botulinum toxin substrate 1 (rho family, small GTP binding protein Rac1) |
| 0,815637493 | 0,36659 | 0,858565436 | 0,02548 | RACGAP1  | Rac GTPase activating protein 1                                                         |
| 0,755236293 | 0,15062 | 0,817902059 | 0,01158 | RAD1     | RAD1 homolog (S. pombe)                                                                 |
| 0,880259014 | 0,2474  | 0,873572896 | 0,00711 | RAD1     | RAD1 homolog (S. pombe)                                                                 |
| 1,089752112 | 0,47227 | 0,881480158 | 0,0437  | RAD1     | RAD1 homolog (S. pombe)                                                                 |
| 1,002776436 | 0,97637 | 0,89564567  | 0,04333 | RAD18    | RAD18 homolog (S. cerevisiae)                                                           |
| 1,000693387 | 0,99528 | 0,905633983 | 0,01869 | RAD18    | RAD18 homolog (S. cerevisiae)                                                           |
| 0,987600861 | 0,96099 | 0,714992493 | 0,01133 | RAD23B   | RAD23 homolog B (S. cerevisiae)                                                         |
| 0,716977624 | 0,16634 | 0,686342216 | 0,00002 | RAD23B   | RAD23 homolog B (S. cerevisiae)                                                         |
| 0,740719899 | 0,10383 | 0,890692901 | 0,04169 | RAD50    | RAD50 homolog (S. cerevisiae)                                                           |
| 0,942131274 | 0,80812 | 0,780786493 | 0,01807 | RAD51AP1 | RAD51 associated protein 1                                                              |
| 1,012554807 | 0,89423 | 1,32317144  | 0,00117 | RAD51B   | RAD51 homolog B (S. cerevisiae)                                                         |
| 0,87175824  | 0,2691  | 0,87175824  | 0,0429  | RAD51B   | RAD51 homolog B (S. cerevisiae)                                                         |
| 1,223488041 | 0,12459 | 1,156688184 | 0,00428 | RAD52    | RAD52 homolog (S. cerevisiae)                                                           |
| 0,864537231 | 0,44056 | 0,829319546 | 0,03845 | RAD54B   | RAD54 homolog B (S. cerevisiae)                                                         |
| 1,106497353 | 0,36299 | 1,229438867 | 0,00956 | RAD54L2  | RAD54-like 2 (S. cerevisiae)                                                            |
| 0,704660378 | 0,05769 | 0,886381699 | 0,01341 | RAE1     | RAE1 RNA export 1 homolog (S. pombe)                                                    |
| 1,07997656  | 0,45374 | 1,157490217 | 0,02498 | RAI1     | retinoic acid induced 1                                                                 |
| 0,988970916 | 0,94872 | 1,23370717  | 0,00394 | RAI1     | retinoic acid induced 1                                                                 |
| 0,891310496 | 0,20986 | 0,829894586 | 0,0046  | RAI1     | retinoic acid induced 1                                                                 |
| 1,189207115 | 0,29759 | 1,353786279 | 0,00093 | RAI14    | retinoic acid induced 14                                                                |
| 1,161508732 | 0,1977  | 1,192508872 | 0,02397 | RAI2     | retinoic acid induced 2                                                                 |
| 0,586824089 | 0,12837 | 0,741233505 | 0,00002 | RALBP1   | ralA binding protein 1                                                                  |
| 0,991029563 | 0,9302  | 0,905633983 | 0,02522 | RALGAPA1 | Ral GTPase activating protein, alpha subunit 1 (catalytic)                              |
| 1,011152081 | 0,88647 | 0,905633983 | 0,02118 | RALGAPA1 | Ral GTPase activating protein, alpha subunit 1 (catalytic)                              |
| 0,899378312 | 0,32834 | 1,088242442 | 0,04866 | RALGAPA2 | Ral GTPase activating protein, alpha subunit 2 (catalytic)                              |
| 1,010451446 | 0,93023 | 1,234562607 | 0,00215 | RALGAPA2 | Ral GTPase activating protein, alpha subunit 2 (catalytic)                              |
| 0,953298545 | 0,75292 | 0,813379198 | 0,00089 | RALGAPB  | Ral GTPase activating protein, beta subunit (non-catalytic)                             |
| 0,842062954 | 0,34661 | 0,843815796 | 0,0184  | RALGPS1  | Ral GEF with PH domain and SH3 binding motif 1                                          |
| 1,044635763 | 0,64403 | 1,164733586 | 0,01713 | RAMP1    | receptor (G protein-coupled) activity modifying protein 1                               |
| 0,688247801 | 0,05548 | 0,71946679  | 0       | RAN      | RAN, member RAS oncogene family                                                         |
| 0,650220073 | 0,24934 | 0,721464343 | 0,005   | RANBP2   | RAN binding protein 2                                                                   |
| 0,825877665 | 0,30154 | 0,799960128 | 0,02962 | RANBP2   | RAN binding protein 2                                                                   |
| 0,76630998  | 0,2594  | 0,682073917 | 0,00042 | RANBP2   | RAN binding protein 2                                                                   |
| 0,815072332 | 0,27677 | 0,722966147 | 0,00002 | RANBP6   | RAN binding protein 6                                                                   |
| 0,718968266 | 0,12103 | 0,741233505 | 0,00481 | RANBP9   | RAN binding protein 9                                                                   |
| 0,801069878 | 0,52691 | 0,739693755 | 0,04204 | RANBP9   | RAN binding protein 9                                                                   |
| 1,222640278 | 0,35422 | 1,245737416 | 0,00242 | RANGRF   | RAN guanine nucleotide release factor                                                   |
| 0,855595026 | 0,29687 | 0,880259014 | 0,02161 | RAP1GDS1 | RAP1, GTP-GDP dissociation stimulator 1                                                 |
| 0,786217292 | 0,31569 | 0,855595026 | 0,01395 | RAP1GDS1 | RAP1, GTP-GDP dissociation stimulator 1                                                 |
| 0,634635443 | 0,27105 | 0,688725023 | 0,00566 | RAP1GDS1 | RAP1, GTP-GDP dissociation stimulator 1                                                 |
| 0,78024548  | 0,51249 | 0,668963777 | 0,00001 | RAP2A    | RAP2A, member of RAS oncogene family                                                    |
| 0,842062954 | 0,46194 | 0,755236293 | 0,00033 | RAP2A    | RAP2A, member of RAS oncogene family                                                    |
| 0,863938187 | 0,38959 | 0,752101876 | 0,00837 | RAP2B    | RAP2B, member of RAS oncogene family                                                    |
| 0,746389192 | 0,28556 | 0,675487042 | 0,00045 | RAP2C    | RAP2C, member of RAS oncogene family                                                    |
| 0,780786493 | 0,19529 | 0,792784137 | 0,01154 | RAP2C    | RAP2C, member of RAS oncogene family                                                    |
| 1,074749173 | 0,7546  | 1,462057448 | 0,00013 | RAPGEF1  | Rap guanine nucleotide exchange factor (GEF) 1                                          |
| 1,087488391 | 0,64148 | 1,321338406 | 0,00006 | RAPGEF1  | Rap guanine nucleotide exchange factor (GEF) 1                                          |
| 1,024556823 | 0,92242 | 0,871154192 | 0,00815 | RAPGEF2  | Rap guanine nucleotide exchange factor (GEF) 2                                          |
| 0,947370071 | 0,72111 | 1,22858698  | 0,00585 | RAPGEF3  | Rap guanine nucleotide exchange factor (GEF) 3                                          |
| 0,695440986 | 0,24727 | 0,618995145 | 0,00008 | RAPH1    | Ras association (RalGDS/AF-6) and pleckstrin homology domains 1                         |
| 0,756808396 | 0,07536 | 0,765248385 | 0,00036 | RAPH1    | Ras association (RalGDS/AF-6) and pleckstrin homology domains 1                         |
| 1,165541198 | 0,29142 | 1,198309021 | 0,03255 | RARA     | retinoic acid receptor, alpha                                                           |
| 1,200803427 | 0,06598 | 1,170398641 | 0,01252 | RARA     | retinoic acid receptor, alpha                                                           |
| 1,041743429 | 0,53644 | 1,155085785 | 0,02125 | RARB     | retinoic acid receptor, beta                                                            |
| 0,93109482  | 0,45353 | 0,806082831 | 0,005   | RARS2    | arginyl-tRNA synthetase 2, mitochondrial                                                |
| 0,640379931 | 0,06476 | 0,683020128 | 0,00148 | RARS2    | arginyl-tRNA synthetase 2, mitochondrial                                                |
| 0,8362464   | 0,42223 | 0,856188285 | 0,0245  | RASA1    | RAS p21 protein activator (GTPase activating protein) 1                                 |
| 0,831622098 | 0,34362 | 0,732042848 | 0,01221 | RASA2    | RAS p21 protein activator 2                                                             |
| 1,262252032 | 0,39041 | 0,840313752 | 0,01054 | RASA2    | RAS p21 protein activator 2                                                             |
| 0,821880187 | 0,09274 | 0,765248385 | 0,00001 | RASAL2   | RAS protein activator like 2                                                            |
| 0,600401714 | 0,10366 | 0,641712949 | 0       | RASAL2   | RAS protein activator like 2                                                            |
| 0,729004689 | 0,15286 | 0,709561678 | 0,00051 | RASAL2   | RAS protein activator like 2                                                            |
| 0,76630998  | 0,05    | 0,833353207 | 0,02624 | RASAL2   | RAS protein activator like 2                                                            |

|             |         |             |         |           |                                                                                       |
|-------------|---------|-------------|---------|-----------|---------------------------------------------------------------------------------------|
| 1,366987452 | 0,15485 | 1,508380077 | 0,00388 | RASAL3    | RAS protein activator like 3                                                          |
| 1,322254605 | 0,05834 | 1,244874235 | 0,01559 | RASD1     | RAS, dexamethasone-induced 1                                                          |
| 0,497579861 | 0,05559 | 0,762600827 | 0,01728 | RASEF     | RAS and EF-hand domain containing                                                     |
| 0,575544746 | 0,09761 | 0,757333158 | 0,01282 | RASEF     | RAS and EF-hand domain containing                                                     |
| 1,164733586 | 0,57449 | 0,852044095 | 0,03497 | RASEF     | RAS and EF-hand domain containing                                                     |
| 1,175276328 | 0,12101 | 1,221793102 | 0,00333 | RASGRF1   | Ras protein-specific guanine nucleotide-releasing factor 1                            |
| 1,161508732 | 0,0979  | 1,189207115 | 0,0124  | RASGRF1   | Ras protein-specific guanine nucleotide-releasing factor 1                            |
| 1,072516617 | 0,48668 | 1,243149669 | 0,00274 | RASGRF2   | Ras protein-specific guanine nucleotide-releasing factor 2                            |
| 1,234562607 | 0,1848  | 1,240567298 | 0,03935 | RASGRP2   | RAS guanyl releasing protein 2 (calcium and DAG-regulated)                            |
| 1,150291893 | 0,21834 | 1,168777249 | 0,03547 | RASGRP4   | RAS guanyl releasing protein 4                                                        |
| 1,080725402 | 0,40796 | 1,212512819 | 0,00537 | RASIP1    | Ras interacting protein 1                                                             |
| 1,069547088 | 0,53838 | 1,202469249 | 0,00262 | RASL10A   | RAS-like, family 10, member A                                                         |
| 0,929160674 | 0,53318 | 1,177227279 | 0,00466 | RASSF7    | Ras association (RalGDS/AF-6) domain family (N-terminal) member 7                     |
| 0,752101876 | 0,05376 | 0,737134609 | 0,00011 | RAVER2    | ribonucleoprotein, PTB-binding 2                                                      |
| 0,783497187 | 0,26333 | 0,720464874 | 0,00232 | RB1CC1    | RB1-inducible coiled-coil 1                                                           |
| 0,772175133 | 0,1374  | 0,759435845 | 0,0172  | RBAK      | RB-associated KRAB zinc finger                                                        |
| 0,70759708  | 0,10249 | 0,753145233 | 0,0005  | RBAK      | RB-associated KRAB zinc finger                                                        |
| 0,818469182 | 0,59053 | 0,729510172 | 0,00305 | RBBP4     | retinoblastoma binding protein 4                                                      |
| 0,613442489 | 0,05804 | 0,791137301 | 0,03256 | RBBP5     | retinoblastoma binding protein 5                                                      |
| 0,922742493 | 0,71064 | 0,727490342 | 0,00672 | RBBP6     | retinoblastoma binding protein 6                                                      |
| 0,639936207 | 0,12052 | 0,755236293 | 0,0047  | RBBP6     | retinoblastoma binding protein 6                                                      |
| 0,71449707  | 0,16796 | 0,717474767 | 0,00042 | RBBP6     | retinoblastoma binding protein 6                                                      |
| 0,541487523 | 0,11977 | 0,71449707  | 0,00013 | RBBP6     | retinoblastoma binding protein 6                                                      |
| 0,8362464   | 0,11407 | 0,867538687 | 0,00944 | RBBP7     | retinoblastoma binding protein 7                                                      |
| 0,780786493 | 0,18033 | 0,721964598 | 0,00001 | RBBP9     | retinoblastoma binding protein 9                                                      |
| 0,984866443 | 0,86688 | 1,160703914 | 0,00128 | RBFOX1    | RNA binding protein, fox-1 homolog (C. elegans) 1                                     |
| 0,742261785 | 0,17799 | 0,810003474 | 0,01462 | RBFOX2    | RNA binding protein, fox-1 homolog (C. elegans) 2                                     |
| 1,051172909 | 0,62501 | 0,86154616  | 0,01716 | RBFOX2    | RNA binding protein, fox-1 homolog (C. elegans) 2                                     |
| 0,834509281 | 0,13682 | 0,833931044 | 0,01726 | RBL1      | retinoblastoma-like 1 (p107)                                                          |
| 1,141554707 | 0,22206 | 1,297738767 | 0,00736 | RBM12B    | RNA binding motif protein 12B                                                         |
| 1,084477409 | 0,69262 | 0,729004689 | 0,00906 | RBM12B    | RNA binding motif protein 12B                                                         |
| 1,227735684 | 0,11059 | 1,182631    | 0,01343 | RBM14     | RNA binding motif protein 14                                                          |
| 1,088997015 | 0,60785 | 0,844986384 | 0,01794 | RBM14     | RNA binding motif protein 14                                                          |
| 1,086734863 | 0,5165  | 1,143930973 | 0,0346  | RBM19     | RNA binding motif protein 19                                                          |
| 1,237132479 | 0,15448 | 1,155085785 | 0,01534 | RBM24     | RNA binding motif protein 24                                                          |
| 0,741747467 | 0,38561 | 0,784584098 | 0,0047  | RBM25     | RNA binding motif protein 25                                                          |
| 0,65747138  | 0,07373 | 0,677832163 | 0,00007 | RBM25     | RNA binding motif protein 25                                                          |
| 0,774855931 | 0,17522 | 0,807760778 | 0,02658 | RBM25     | RNA binding motif protein 25                                                          |
| 1,085229372 | 0,59585 | 0,808320869 | 0,02309 | RBM26-AS1 | RBM26 antisense RNA 1 (non-protein coding)                                            |
| 1,041743429 | 0,83253 | 0,889458994 | 0,03515 | RBM27     | RNA binding motif protein 27                                                          |
| 0,820741609 | 0,21691 | 0,817902059 | 0,00646 | RBM27     | RNA binding motif protein 27                                                          |
| 0,721464343 | 0,0768  | 0,71400199  | 0,00298 | RBM3      | RNA binding motif (RNP1, RRM) protein 3                                               |
| 0,938221197 | 0,51002 | 1,215036792 | 0,02241 | RBM33     | RNA binding motif protein 33                                                          |
| 1,224336392 | 0,15085 | 1,261377409 | 0,02917 | RBM38     | RNA binding motif protein 38                                                          |
| 0,97063447  | 0,92558 | 0,716977624 | 0,00141 | RBM39     | RNA binding motif protein 39                                                          |
| 0,647072827 | 0,1018  | 0,745872013 | 0,00094 | RBM41     | RNA binding motif protein 41                                                          |
| 0,991716731 | 0,93324 | 0,86154616  | 0,02482 | RBM45     | RNA binding motif protein 45                                                          |
| 0,77916458  | 0,13483 | 0,847919965 | 0,03191 | RBM8A     | RNA binding motif protein 8A                                                          |
| 0,781869643 | 0,08907 | 0,670356296 | 0,00555 | RBMS1     | RNA binding motif, single stranded interacting protein 1                              |
| 1,219255094 | 0,0679  | 1,252664439 | 0,00232 | RBMS2     | RNA binding motif, single stranded interacting protein 2                              |
| 1,160703914 | 0,21928 | 1,220946513 | 0,00213 | RBMS2     | RNA binding motif, single stranded interacting protein 2                              |
| 1,118061851 | 0,171   | 1,185092771 | 0,0005  | RBMS2     | RNA binding motif, single stranded interacting protein 2                              |
| 1,083725967 | 0,19576 | 1,102669163 | 0,0401  | RBMS3     | RNA binding motif, single stranded interacting protein 3                              |
| 1,147902414 | 0,11078 | 1,167967395 | 0,04986 | RBMS3     | RNA binding motif, single stranded interacting protein 3                              |
| 1,094293701 | 0,18161 | 1,104964485 | 0,025   | RBMY2FP   | RNA binding motif protein, Y-linked, family 2, member F pseudogene                    |
| 1,112650121 | 0,18099 | 1,152686347 | 0,00552 | RBP4      | retinol binding protein 4, plasma                                                     |
| 0,801625329 | 0,19855 | 0,825877665 | 0,01798 | RBPJ      | recombination signal binding protein for immunoglobulin kappa J region                |
| 1,41519416  | 0,17478 | 1,293248932 | 0,02496 | RBPMS     | RNA binding protein with multiple splicing                                            |
| 0,670356296 | 0,0994  | 0,828744904 | 0,00541 | RC3H1     | ring finger and CCCH-type domains 1                                                   |
| 0,950659101 | 0,82184 | 0,835666599 | 0,03306 | RC3H2     | ring finger and CCCH-type domains 2                                                   |
| 0,754712984 | 0,13594 | 0,815637493 | 0,00433 | RC3H2     | ring finger and CCCH-type domains 2                                                   |
| 1,025978145 | 0,93118 | 0,859756486 | 0,00816 | RC3H2     | ring finger and CCCH-type domains 2                                                   |
| 0,927873476 | 0,47401 | 0,754712984 | 0,00218 | RCAN3     | RCAN family member 3                                                                  |
| 0,78132788  | 0,09947 | 0,759962428 | 0,00209 | RCAN3     | RCAN family member 3                                                                  |
| 1,098854218 | 0,41953 | 1,117287138 | 0,00553 | RCBTB2    | regulator of chromosome condensation (RCC1) and BTB (POZ) domain containing protein 2 |
| 0,935623498 | 0,59598 | 1,114193651 | 0,02357 | RCCD1     | RCC1 domain containing 1                                                              |
| 1,049716684 | 0,80407 | 0,808320869 | 0,03117 | RCHY1     | ring finger and CHY zinc finger domain containing 1                                   |
| 1,076240125 | 0,52826 | 0,871154192 | 0,02912 | RCHY1     | ring finger and CHY zinc finger domain containing 1                                   |
| 0,949342121 | 0,49711 | 0,89564567  | 0,02647 | RCL1      | RNA terminal phosphate cyclase-like 1                                                 |
| 1,25353302  | 0,06762 | 1,255271991 | 0,01261 | RCN1      | reticulocalbin 1, EF-hand calcium binding domain                                      |
| 1,107264584 | 0,68969 | 0,898132373 | 0,03734 | RCN2      | reticulocalbin 2, EF-hand calcium binding domain                                      |
| 1,00695555  | 0,96533 | 0,877213549 | 0,03372 | RCN2      | reticulocalbin 2, EF-hand calcium binding domain                                      |
| 1,068065408 | 0,77914 | 1,374588696 | 0,00155 | RCN3      | reticulocalbin 3, EF-hand calcium binding domain                                      |
| 1,0181852   | 0,88751 | 0,825877665 | 0,00872 | RCOR1     | REST corepressor 1                                                                    |
| 0,851453708 | 0,24974 | 0,892546971 | 0,02796 | RDBP      | RD RNA binding protein                                                                |
| 0,782954296 | 0,26638 | 0,789493887 | 0,00456 | RDH11     | retinol dehydrogenase 11 (all-trans/9-cis/11-cis)                                     |
| 0,702222438 | 0,17638 | 0,62676651  | 0,00119 | RDH13     | retinol dehydrogenase 13 (all-trans/9-cis)                                            |
| 0,786762445 | 0,13663 | 0,698339266 | 0       | RDH14     | retinol dehydrogenase 14 (all-trans/9-cis/11-cis)                                     |
| 1,01395948  | 0,86692 | 1,226884977 | 0,00483 | RDH16     | retinol dehydrogenase 16 (all-trans)                                                  |
| 1,094293701 | 0,33232 | 1,141554707 | 0,04868 | RDH5      | retinol dehydrogenase 5 (11-cis/9-cis)                                                |
| 1,009751298 | 0,90775 | 1,210833084 | 0,00977 | RDH8      | retinol dehydrogenase 8 (all-trans)                                                   |
| 0,812815602 | 0,2957  | 0,804408371 | 0,00679 | RDX       | radixin                                                                               |
| 1,100378609 | 0,28591 | 1,343503426 | 0,02652 | RECK      | reversion-inducing-cysteine-rich protein with kazal motifs                            |
| 0,963929808 | 0,66313 | 1,156688184 | 0,03047 | RECQL4    | RecQ protein-like 4                                                                   |
| 1,030253954 | 0,89292 | 1,179356592 | 0,01628 | REEP5     | receptor accessory protein 5                                                          |
| 0,682546859 | 0,05369 | 0,905633983 | 0,04824 | REEP5     | receptor accessory protein 5                                                          |
| 1,068805991 | 0,44233 | 1,10343374  | 0,0474  | REG1A     | regenerating islet-derived 1 alpha                                                    |
| 1,139183377 | 0,21546 | 1,142346247 | 0,00357 | REG1B     | regenerating islet-derived 1 beta                                                     |
| 1,170398641 | 0,09733 | 1,245737416 | 0,0015  | REG1P     | regenerating islet-derived 1 pseudogene                                               |
| 0,971980988 | 0,86459 | 0,864537231 | 0,01622 | REL       | v-rel reticuloendotheliosis viral oncogene homolog (avian)                            |
| 1,057570964 | 0,71554 | 1,156688184 | 0,04937 | RELB      | v-rel reticuloendotheliosis viral oncogene homolog B                                  |
| 1,190856849 | 0,15882 | 1,161508732 | 0,0315  | RELT      | RELT tumor necrosis factor receptor                                                   |
| 1,163926534 | 0,16033 | 1,127400412 | 0,02653 | REN       | renin                                                                                 |
| 0,831622098 | 0,19803 | 0,90000193  | 0,02    | RER1      | RER1 retention in endoplasmic reticulum 1 homolog (S. cerevisiae)                     |
| 1,050444544 | 0,5923  | 1,151089491 | 0,0148  | RET       | ret proto-oncogene                                                                    |
| 0,712025098 | 0,12994 | 0,698339266 | 0,00026 | REV1      | REV1 homolog (S. cerevisiae)                                                          |
| 0,854409741 | 0,54507 | 0,692554734 | 0,00002 | REV1      | REV1 homolog (S. cerevisiae)                                                          |
| 0,747424624 | 0,20229 | 0,750539549 | 0,01021 | REV3L     | REV3-like, catalytic subunit of DNA polymerase zeta (yeast)                           |
| 0,839731493 | 0,13202 | 0,87539133  | 0,01622 | RFC1      | replication factor C (activator 1) 1, 145kDa                                          |
| 0,949342121 | 0,77708 | 0,863938187 | 0,00873 | RFC3      | replication factor C (activator 1) 3, 38kDa                                           |
| 1,041021598 | 0,67522 | 1,155886707 | 0,00405 | RFC3      | replication factor C (activator 1) 3, 38kDa                                           |
| 0,777007269 | 0,13442 | 0,711531731 | 0,00029 | RFC5      | replication factor C (activator 1) 5, 36.5kDa                                         |
| 1,119612889 | 0,26841 | 1,132098902 | 0,02816 | RFFL      | ring finger and FYVE-like domain containing 1                                         |
| 0,897510051 | 0,56946 | 0,859756486 | 0,01679 | RFFL      | ring finger and FYVE-like domain containing 1                                         |

|             |         |             |         |          |                                                                                  |
|-------------|---------|-------------|---------|----------|----------------------------------------------------------------------------------|
| 0,738157203 | 0,13527 | 0,702222438 | 0,00018 | RFFL     | ring finger and FYVE-like domain containing 1                                    |
| 1,030253954 | 0,82728 | 0,885153765 | 0,02598 | RFFL     | ring finger and FYVE-like domain containing 1                                    |
| 0,890075733 | 0,14311 | 0,858565436 | 0,02352 | RFP1L    | ret finger protein-like 1                                                        |
| 0,979420298 | 0,76718 | 1,089752112 | 0,01866 | RFTN1    | raftlin, lipid raft linker 1                                                     |
| 1,079228237 | 0,4175  | 1,17609125  | 0,02093 | RFTN2    | raftlin family member 2                                                          |
| 0,839149637 | 0,60312 | 0,866336856 | 0,04012 | RFDW2    | ring finger and WD repeat domain 2                                               |
| 0,800514811 | 0,18618 | 0,70270935  | 0,0004  | RFX2     | regulatory factor X, 2 (influences HLA class II expression)                      |
| 1,011853201 | 0,84122 | 1,088997015 | 0,01412 | RFX3     | regulatory factor X, 3 (influences HLA class II expression)                      |
| 0,976031761 | 0,81547 | 0,830470024 | 0,04916 | RFX3     | regulatory factor X, 3 (influences HLA class II expression)                      |
| 1,123499903 | 0,24414 | 1,197487805 | 0,0018  | RFX5     | regulatory factor X, 5 (influences HLA class II expression)                      |
| 0,853226098 | 0,35287 | 0,780786493 | 0,0427  | RFX7     | regulatory factor X, 7                                                           |
| 1,108032348 | 0,71246 | 0,856188285 | 0,02127 | RFX7     | regulatory factor X, 7                                                           |
| 1,271031689 | 0,15621 | 0,859756486 | 0,02033 | RG9MTD2  | RNA (guanine-9-) methyltransferase domain containing 2                           |
| 1,53261996  | 0,07329 | 1,330529041 | 0,00387 | RGL1     | ral guanine nucleotide dissociation stimulator-like 1                            |
| 0,934327347 | 0,38812 | 1,141554707 | 0,00612 | RGL3     | ral guanine nucleotide dissociation stimulator-like 3                            |
| 0,839731493 | 0,2145  | 0,832198735 | 0,01067 | RGMB     | RGM domain family, member B                                                      |
| 0,770571108 | 0,09621 | 0,744838732 | 0,0261  | RGMB     | RGM domain family, member B                                                      |
| 0,594603558 | 0,06647 | 0,693515485 | 0,01217 | RGNEF    | 190 kDa guanine nucleotide exchange factor                                       |
| 1,016774673 | 0,81337 | 1,130530567 | 0,02035 | RGR      | retinal G protein coupled receptor                                               |
| 1,101905116 | 0,19893 | 1,131314463 | 0,00295 | RGS1     | regulator of G-protein signaling 1                                               |
| 0,710546022 | 0,10722 | 0,784584098 | 0,02755 | RGS12    | regulator of G-protein signaling 12                                              |
| 1,175276328 | 0,23262 | 1,299539062 | 0,0029  | RGS16    | regulator of G-protein signaling 16                                              |
| 1,061423209 | 0,4703  | 1,134455485 | 0,02707 | RGS22    | regulator of G-protein signaling 22                                              |
| 1,420107359 | 0,17772 | 2,200757219 | 0,00051 | RGS4     | regulator of G-protein signaling 4                                               |
| 1,358486285 | 0,1066  | 1,851892045 | 0,0002  | RGS4     | regulator of G-protein signaling 4                                               |
| 1,284315809 | 0,41172 | 1,520978753 | 0,02559 | RGS5     | regulator of G-protein signaling 5                                               |
| 1,367935304 | 0,13366 | 1,312211255 | 0,04712 | RGS5     | regulator of G-protein signaling 5                                               |
| 0,962594443 | 0,7434  | 1,234562607 | 0,00338 | RGS6     | regulator of G-protein signaling 6                                               |
| 1,129747215 | 0,28901 | 1,193335743 | 0,00637 | RHBDD1   | rhomboid domain containing 1                                                     |
| 0,902500727 | 0,71229 | 1,159899655 | 0,04125 | RHBDD2   | rhomboid domain containing 2                                                     |
| 0,66342257  | 0,06114 | 0,8962667   | 0,0311  | RHBD1F   | rhomboid 5 homolog 1 (Drosophila)                                                |
| 0,862741345 | 0,29614 | 0,868140228 | 0,04299 | RHBD1F   | rhomboid 5 homolog 2 (Drosophila)                                                |
| 0,720964436 | 0,15351 | 0,70027816  | 0,02952 | RHBDL2   | rhomboid, veinlet-like 2 (Drosophila)                                            |
| 1,076240125 | 0,37896 | 1,140763716 | 0,01174 | RHBDL3   | rhomboid, veinlet-like 3 (Drosophila)                                            |
| 1,178539408 | 0,05129 | 1,111879158 | 0,04639 | RHD      | Rh blood group, D antigen                                                        |
| 0,912565489 | 0,48271 | 0,868742185 | 0,02888 | RHEB     | Ras homolog enriched in brain                                                    |
| 0,986916546 | 0,88467 | 1,106497353 | 0,03107 | RHEBL1   | Ras homolog enriched in brain like 1                                             |
| 1,086734863 | 0,4594  | 1,153485605 | 0,00401 | RHO      | rhodopsin                                                                        |
| 1,070288698 | 0,43133 | 1,114966219 | 0,02937 | RHO      | rhodopsin                                                                        |
| 1,074749173 | 0,31372 | 1,083725967 | 0,04514 | RHOA     | ras homolog gene family, member A                                                |
| 1,095811766 | 0,26581 | 1,356604327 | 0       | RHOBTB2  | Rho-related BTB domain containing 2                                              |
| 1,07549439  | 0,58873 | 1,181811547 | 0,02815 | RHOBTB3  | Rho-related BTB domain containing 3                                              |
| 1,139973273 | 0,25343 | 1,143930973 | 0,00405 | RHOBTB3  | Rho-related BTB domain containing 3                                              |
| 1,195819797 | 0,19832 | 1,295042999 | 0,00217 | RHOF     | ras homolog gene family, member F (in filopodia)                                 |
| 1,173648178 | 0,16092 | 1,241427492 | 0,01542 | RHOJ     | ras homolog gene family, member J                                                |
| 1,200803427 | 0,13857 | 1,343503426 | 0,00333 | RHOJ     | ras homolog gene family, member J                                                |
| 1,022428531 | 0,79921 | 1,374588696 | 0,00013 | RHOJ     | ras homolog gene family, member J                                                |
| 1,144724161 | 0,11743 | 1,260503392 | 0,00205 | RHOJ     | ras homolog gene family, member J                                                |
| 0,76101669  | 0,30284 | 0,775930854 | 0,00642 | RHOT1    | ras homolog gene family, member T1                                               |
| 0,785672517 | 0,19931 | 0,840313752 | 0,00622 | RHOT1    | ras homolog gene family, member T1                                               |
| 1,025978145 | 0,85316 | 1,146312186 | 0,02716 | RHOT2    | ras homolog gene family, member T2                                               |
| 1,096571589 | 0,31966 | 1,180992661 | 0,01097 | RHOT2    | ras homolog gene family, member T2                                               |
| 1,039579435 | 0,78025 | 1,212512819 | 0,0086  | RHOT2    | ras homolog gene family, member T2                                               |
| 1,426025717 | 0,07213 | 1,202469249 | 0,00423 | RHOU     | ras homolog gene family, member U                                                |
| 1,116512962 | 0,28964 | 1,122721422 | 0,02398 | RHOU     | ras homolog gene family, member U                                                |
| 0,97329374  | 0,8996  | 0,777007269 | 0,00681 | RIF1     | RAP1 interacting factor homolog (yeast)                                          |
| 0,863938187 | 0,44983 | 0,718968266 | 0,00045 | RIF1     | RAP1 interacting factor homolog (yeast)                                          |
| 0,90000193  | 0,3306  | 0,859160755 | 0,0296  | RIF1     | RAP1 interacting factor homolog (yeast)                                          |
| 0,552865327 | 0,09864 | 0,557096825 | 0,00163 | RIF1     | RAP1 interacting factor homolog (yeast)                                          |
| 1,197478705 | 0,10307 | 1,184271612 | 0,0059  | RILP     | Rab interacting lysosomal protein                                                |
| 1,080725402 | 0,39309 | 1,185914499 | 0,01286 | RIMKLA   | ribosomal modification protein rimK-like family member A                         |
| 1,020304659 | 0,86565 | 0,918276162 | 0,03119 | RIMKLA   | ribosomal modification protein rimK-like family member A                         |
| 1,195819797 | 0,1532  | 1,341642225 | 0,00005 | RIMS2    | regulating synaptic membrane exocytosis 2                                        |
| 1,016774673 | 0,8285  | 1,214194884 | 0,01135 | RIMS4    | regulating synaptic membrane exocytosis 4                                        |
| 1,281647924 | 0,12646 | 1,336074078 | 0,00161 | RIN2     | Ras and Rab interactor 2                                                         |
| 1,148698355 | 0,29422 | 1,135242102 | 0,01471 | RIN3     | Ras and Rab interactor 3                                                         |
| 0,755236293 | 0,23176 | 0,722966147 | 0,00006 | RIOK1    | RIO kinase 1 (yeast)                                                             |
| 0,780786493 | 0,08378 | 0,823020345 | 0,00677 | RIOK2    | RIO kinase 2 (yeast)                                                             |
| 1,048262476 | 0,75533 | 0,828744904 | 0,0238  | RIOK2    | RIO kinase 2 (yeast)                                                             |
| 0,708087719 | 0,06039 | 0,738157203 | 0,00007 | RIOK3    | RIO kinase 3 (yeast)                                                             |
| 0,639049682 | 0,24065 | 0,676424116 | 0,00051 | RIOK3    | RIO kinase 3 (yeast)                                                             |
| 1,065108203 | 0,40662 | 1,164733586 | 0,00112 | RIOK3    | RIO kinase 3 (yeast)                                                             |
| 0,953959551 | 0,73994 | 1,114966219 | 0,00837 | RIPK3    | receptor-interacting serine-threonine kinase 3                                   |
| 1,284315809 | 0,0515  | 1,208317843 | 0,01081 | RIPPLY2  | rippy2 homolog (zebrafish)                                                       |
| 0,933679945 | 0,79094 | 0,803850991 | 0,04475 | RIT1     | Ras-like without CAAX 1                                                          |
| 0,838568184 | 0,42365 | 0,790589117 | 0,01462 | RIT1     | Ras-like without CAAX 1                                                          |
| 1,151089491 | 0,2014  | 1,167158102 | 0,01449 | RLBP1    | retinaldehyde binding protein 1                                                  |
| 0,944747041 | 0,65273 | 0,878430468 | 0,01226 | RLF      | rearranged L-myc fusion                                                          |
| 1,101905116 | 0,69895 | 0,747424624 | 0,01577 | RLIM     | ring finger protein, LIM domain interacting                                      |
| 1,126619228 | 0,33714 | 1,30224419  | 0,00614 | RLIM     | ring finger protein, LIM domain interacting                                      |
| 1,199139914 | 0,0657  | 1,191682575 | 0,02676 | RLTPR    | RGD motif, leucine rich repeats, tropomodulin domain and proline-rich containing |
| 0,906261938 | 0,65863 | 0,777546036 | 0,00216 | RM1      | RM1, RecQ mediated genome instability 1, homolog (S. cerevisiae)                 |
| 1,183451022 | 0,15395 | 1,106497353 | 0,04394 | RMST     | rhabdomyosarcoma 2 associated transcript (non-protein coding)                    |
| 1,159095952 | 0,49239 | 1,816296835 | 0       | RNASE1   | ribonuclease, RNase A family, 1 (pancreatic)                                     |
| 1,111879158 | 0,39052 | 1,114966219 | 0,02752 | RNASE3   | ribonuclease, RNase A family, 3                                                  |
| 0,961927455 | 0,84065 | 0,847332435 | 0,02114 | RNASEH1  | ribonuclease H1                                                                  |
| 0,840313752 | 0,15181 | 0,893785162 | 0,0415  | RNASEH1  | ribonuclease H1                                                                  |
| 1,267512522 | 0,05387 | 1,128964405 | 0,0276  | RNASEH2C | ribonuclease H2, subunit C                                                       |
| 0,957271458 | 0,59015 | 1,329607108 | 0,00039 | RNASEH2C | ribonuclease H2, subunit C                                                       |
| 0,665264521 | 0,36207 | 1,158292806 | 0,01085 | RNASEK   | ribonuclease, RNase K                                                            |
| 1,437936533 | 0,25774 | 1,43097652  | 0,00002 | RNASET2  | ribonuclease T2                                                                  |
| 0,820741609 | 0,22539 | 0,762072415 | 0,03228 | RNF11    | ring finger protein 11                                                           |
| 0,978063473 | 0,91577 | 0,828170661 | 0,0183  | RNF111   | ring finger protein 111                                                          |
| 1,058484395 | 0,59944 | 1,16634937  | 0,01325 | RNF112   | ring finger protein 112                                                          |
| 1,033114388 | 0,76093 | 1,17772279  | 0,00296 | RNF113A  | ring finger protein 113A                                                         |
| 0,865136691 | 0,42136 | 0,902500727 | 0,00634 | RNF114   | ring finger protein 114                                                          |
| 1,038139271 | 0,84235 | 1,143930973 | 0,02558 | RNF114   | ring finger protein 114                                                          |
| 1,159095952 | 0,11328 | 1,28877463  | 0,00154 | RNF125   | ring finger protein 125                                                          |
| 0,911301281 | 0,79014 | 0,828170661 | 0,01029 | RNF13    | ring finger protein 13                                                           |
| 0,802181166 | 0,19098 | 0,801625329 | 0,00421 | RNF13    | ring finger protein 13                                                           |
| 0,991716731 | 0,97844 | 1,327765158 | 0,00027 | RNF130   | ring finger protein 130                                                          |
| 1,126619228 | 0,22016 | 1,132098902 | 0,01358 | RNF133   | ring finger protein 133                                                          |
| 0,77546036  | 0,0531  | 0,782954296 | 0,00053 | RNF135   | ring finger protein 135                                                          |
| 0,791685866 | 0,05401 | 0,753145233 | 0,00004 | RNF135   | ring finger protein 135                                                          |

|             |         |             |         |           |                                                            |
|-------------|---------|-------------|---------|-----------|------------------------------------------------------------|
| 0,798851916 | 0,187   | 0,686818117 | 0,0002  | RNF138    | ring finger protein 138                                    |
| 0,915733686 | 0,64264 | 0,673616788 | 0,00041 | RNF138    | ring finger protein 138                                    |
| 0,911933166 | 0,53652 | 0,840313752 | 0,00163 | RNF139    | ring finger protein 139                                    |
| 0,820172911 | 0,111   | 0,777546036 | 0,00095 | RNF141    | ring finger protein 141                                    |
| 0,705637922 | 0,10745 | 0,681129017 | 0,00032 | RNF141    | ring finger protein 141                                    |
| 0,726482525 | 0,26847 | 0,800514811 | 0,00003 | RNF144B   | ring finger protein 144B                                   |
| 1,056285625 | 0,53044 | 1,173648178 | 0,0241  | RNF145    | ring finger protein 145                                    |
| 0,825305409 | 0,0904  | 0,87417862  | 0,02081 | RNF149    | ring finger protein 149                                    |
| 1,082224645 | 0,52115 | 1,25353302  | 0,00268 | RNF157    | ring finger protein 157                                    |
| 1,237990291 | 0,07784 | 1,147107024 | 0,00237 | RNF157    | ring finger protein 157                                    |
| 0,853817714 | 0,50865 | 0,872967591 | 0,04989 | RNF168    | ring finger protein 168                                    |
| 0,964598185 | 0,64732 | 0,901250463 | 0,02222 | RNF17     | ring finger protein 17                                     |
| 0,76154437  | 0,15484 | 0,744322628 | 0,02099 | RNF170    | ring finger protein 170                                    |
| 0,822450069 | 0,37365 | 0,804408371 | 0,00535 | RNF170    | ring finger protein 170                                    |
| 1,060687741 | 0,50005 | 1,128964405 | 0,00443 | RNF186    | ring finger protein 186                                    |
| 1,0453601   | 0,6304  | 1,155085785 | 0,02854 | RNF187    | ring finger protein 187                                    |
| 1,262252032 | 0,06103 | 1,216722359 | 0,00396 | RNF187    | ring finger protein 187                                    |
| 0,774319028 | 0,15648 | 0,783497187 | 0,02331 | RNF19A    | ring finger protein 19A                                    |
| 0,76154437  | 0,23035 | 0,741233505 | 0,00268 | RNF19A    | ring finger protein 19A                                    |
| 1,251796459 | 0,19757 | 1,327765158 | 0,00622 | RNF207    | ring finger protein 207                                    |
| 0,929804943 | 0,42253 | 1,143930973 | 0,01384 | RNF207    | ring finger protein 207                                    |
| 1,217566019 | 0,06175 | 1,187559666 | 0,00362 | RNF212    | ring finger protein 212                                    |
| 1,057018041 | 0,74141 | 1,199139914 | 0,02635 | RNF213    | ring finger protein 213                                    |
| 1,303147149 | 0,45669 | 1,20163605  | 0,04195 | RNF213    | ring finger protein 213                                    |
| 1,099616149 | 0,42059 | 1,185092771 | 0,01113 | RNF213    | ring finger protein 213                                    |
| 1,131314463 | 0,11295 | 1,17609125  | 0,01876 | RNF213    | ring finger protein 213                                    |
| 1,190856849 | 0,05197 | 1,29145735  | 0,00014 | RNF214    | ring finger protein 214                                    |
| 0,882091365 | 0,51456 | 0,81056512  | 0,00889 | RNF219    | ring finger protein 219                                    |
| 1,038859103 | 0,6978  | 1,164733586 | 0,00964 | RNF219    | ring finger protein 219                                    |
| 0,965936329 | 0,83524 | 1,194991205 | 0,02081 | RNF220    | ring finger protein 220                                    |
| 1,048262476 | 0,80237 | 1,130530567 | 0,02513 | RNF24     | ring finger protein 24                                     |
| 0,955945318 | 0,6484  | 0,85086373  | 0,04634 | RNF34     | ring finger protein 34                                     |
| 1,063632673 | 0,69109 | 1,137605228 | 0,00679 | RNF5      | ring finger protein 5                                      |
| 0,717474767 | 0,14794 | 0,678302164 | 0,0015  | RNF6      | ring finger protein (C3H2C3 type) 6                        |
| 0,859160755 | 0,5126  | 0,674083866 | 0,00582 | RNFT1     | ring finger protein, transmembrane 1                       |
| 1,100378609 | 0,38699 | 1,247465572 | 0,00147 | RNFT2     | ring finger protein, transmembrane 2                       |
| 1,212512819 | 0,08679 | 1,139973273 | 0,00669 | RNFT2     | ring finger protein, transmembrane 2                       |
| 1,124278924 | 0,1575  | 1,157490217 | 0,00375 | RNGTT     | RNA guanylyltransferase and 5'-phosphatase                 |
| 0,919550046 | 0,53136 | 0,7944344   | 0,00386 | RNLS      | renalase, FAD-dependent amine oxidase                      |
| 0,833353207 | 0,08117 | 0,814507563 | 0,00324 | RNMTL1    | RNA methyltransferase like 1                               |
| 0,667574152 | 0,17572 | 0,778624691 | 0,00767 | RNPC3     | RNA-binding region (RNP1, RRM) containing 3                |
| 0,729004689 | 0,06251 | 0,721464343 | 0,00412 | RNPC3     | RNA-binding region (RNP1, RRM) containing 3                |
| 1,200803427 | 0,19868 | 1,221793102 | 0,02231 | RNPEPL1   | arginyl aminopeptidase (aminopeptidase B)-like 1           |
| 0,693515485 | 0,16124 | 0,657015814 | 0       | ROBO2     | roundabout, axon guidance receptor, homolog 2 (Drosophila) |
| 0,888226796 | 0,52184 | 1,162314108 | 0,0205  | ROGDI     | rogdi homolog (Drosophila)                                 |
| 0,788946841 | 0,41974 | 0,711531731 | 0,00263 | ROR1      | receptor tyrosine kinase-like orphan receptor 1            |
| 1,170398641 | 0,19775 | 1,182631    | 0,04635 | ROR2      | receptor tyrosine kinase-like orphan receptor 2            |
| 1,172834949 | 0,13014 | 1,150291893 | 0,01099 | ROR2      | receptor tyrosine kinase-like orphan receptor 2            |
| 1,209155676 | 0,07248 | 1,167967395 | 0,02586 | RORC      | RAR-related orphan receptor C                              |
| 1,115739322 | 0,17394 | 1,121166078 | 0,02794 | ROS1      | c-ros oncogene 1, receptor tyrosine kinase                 |
| 0,977385766 | 0,91311 | 0,753145233 | 0,02549 | RP2       | retinitis pigmentosa 2 (X-linked recessive)                |
| 0,840313752 | 0,48853 | 0,835666959 | 0,00473 | RP9       | retinitis pigmentosa 9 (autosomal dominant)                |
| 0,978063473 | 0,7311  | 0,90062598  | 0,02383 | RP9P      | retinitis pigmentosa 9 pseudogene                          |
| 0,63860688  | 0,22865 | 0,771105413 | 0,04736 | RPA1      | replication protein A1, 70kDa                              |
| 1,080725402 | 0,56048 | 1,158292806 | 0,0153  | RPA2      | replication protein A2, 32kDa                              |
| 0,925304428 | 0,57842 | 1,114966219 | 0,04012 | RPA4      | replication protein A4, 30kDa                              |
| 0,732042848 | 0,08756 | 0,793333843 | 0,01733 | RPAIN     | RPA interacting protein                                    |
| 0,812815602 | 0,13976 | 0,824162085 | 0,00082 | RPAP2     | RNA polymerase II associated protein 2                     |
| 0,875998315 | 0,48537 | 0,745355193 | 0,00867 | RPAP3     | RNA polymerase II associated protein 3                     |
| 0,784584098 | 0,16471 | 0,813943185 | 0,00489 | RPE       | ribulose-5-phosphate-3-epimerase                           |
| 0,675487042 | 0,16177 | 0,72597914  | 0,00709 | RPE       | ribulose-5-phosphate-3-epimerase                           |
| 0,964598185 | 0,77201 | 0,856781955 | 0,00484 | RPGR      | retinitis pigmentosa GTPase regulator                      |
| 0,921464186 | 0,40615 | 0,917004043 | 0,04318 | RPL10     | ribosomal protein L10                                      |
| 1,199971382 | 0,08118 | 1,125838586 | 0,01168 | RPL13     | ribosomal protein L13                                      |
| 0,953959551 | 0,6505  | 0,790041312 | 0,00036 | RPL13     | ribosomal protein L13                                      |
| 0,890692901 | 0,3548  | 0,810003474 | 0,00047 | RPL13     | ribosomal protein L13                                      |
| 1,037419937 | 0,70086 | 1,204972315 | 0,00162 | RPL13AP17 | ribosomal protein L13a pseudogene 17                       |
| 0,450625231 | 0,08859 | 0,871154192 | 0,01339 | RPL14     | ribosomal protein L14                                      |
| 0,610050255 | 0,07199 | 0,873572896 | 0,00688 | RPL14     | ribosomal protein L14                                      |
| 1,046810282 | 0,77578 | 0,807760778 | 0,00464 | RPL15     | ribosomal protein L15                                      |
| 0,691116103 | 0,10201 | 0,835087919 | 0,02982 | RPL17     | ribosomal protein L17                                      |
| 0,598324482 | 0,15219 | 0,909408252 | 0,02178 | RPL19     | ribosomal protein L19                                      |
| 0,840313752 | 0,10801 | 0,768437591 | 0,00035 | RPL23     | ribosomal protein L23                                      |
| 0,976031761 | 0,88567 | 0,839149637 | 0,01345 | RPL23AP7  | ribosomal protein L23a pseudogene 7                        |
| 0,752623374 | 0,12786 | 0,6341957   | 0,00002 | RPL27A    | ribosomal protein L27a                                     |
| 0,463294031 | 0,12953 | 0,892546971 | 0,00281 | RPL29     | ribosomal protein L29                                      |
| 0,493458273 | 0,15977 | 0,908148418 | 0,00861 | RPL29     | ribosomal protein L29                                      |
| 0,658839976 | 0,14177 | 0,903752727 | 0,03132 | RPL3      | ribosomal protein L3                                       |
| 0,946713631 | 0,40321 | 0,886996305 | 0,005   | RPL30     | ribosomal protein L30                                      |
| 0,686818117 | 0,05924 | 0,680185426 | 0,0001  | RPL31     | ribosomal protein L31                                      |
| 0,938871747 | 0,41808 | 0,898755127 | 0,01883 | RPL35A    | ribosomal protein L35a                                     |
| 0,581157054 | 0,05303 | 0,684441907 | 0,0003  | RPL37A    | ribosomal protein L37a                                     |
| 0,690637224 | 0,07008 | 0,897510051 | 0,0061  | RPL4      | ribosomal protein L4                                       |
| 0,632439771 | 0,10827 | 0,910669834 | 0,03492 | RPL4      | ribosomal protein L4                                       |
| 0,628071191 | 0,17093 | 0,905633983 | 0,04614 | RPL5      | ribosomal protein L5                                       |
| 0,8362464   | 0,24697 | 0,76101669  | 0,00227 | RPL5      | ribosomal protein L5                                       |
| 0,552865327 | 0,08681 | 0,920187651 | 0,02925 | RPL6      | ribosomal protein L6                                       |
| 0,998614666 | 0,9911  | 0,787853886 | 0,00247 | RPL7      | ribosomal protein L7                                       |
| 1,424050196 | 0,13152 | 1,272794935 | 0,01887 | RPN1      | ribophorin I                                               |
| 0,980099415 | 0,9705  | 1,426025717 | 0,00006 | RPN2      | ribophorin II                                              |
| 1,268391399 | 0,09884 | 1,199139914 | 0,04285 | RPP25     | ribonuclease P/MRP 25kDa subunit                           |
| 0,87539133  | 0,22309 | 0,752623374 | 0,00116 | RPP30     | ribonuclease P/MRP 30kDa subunit                           |
| 0,804966138 | 0,07144 | 0,921464186 | 0,03719 | RPP30     | ribonuclease P/MRP 30kDa subunit                           |
| 1,208317843 | 0,10626 | 1,229438867 | 0,00003 | RPPH1     | ribonuclease P RNA component H1                            |
| 0,736623843 | 0,23949 | 0,787853886 | 0,02786 | RPRD1A    | regulation of nuclear pre-mRNA domain containing 1A        |
| 0,689202576 | 0,18583 | 0,763658749 | 0,00862 | RPRD1A    | regulation of nuclear pre-mRNA domain containing 1A        |
| 0,785672517 | 0,24715 | 0,787853886 | 0,00187 | RPRD1A    | regulation of nuclear pre-mRNA domain containing 1A        |
| 1,083725967 | 0,36613 | 1,121166078 | 0,03732 | RPS10P7   | ribosomal protein S10 pseudogene 7                         |
| 1,070288698 | 0,53966 | 1,209155676 | 0,00331 | RPS12     | ribosomal protein S12                                      |
| 0,887611337 | 0,11105 | 0,931740429 | 0,04958 | RPS15A    | ribosomal protein S15a                                     |
| 1,008352455 | 0,96237 | 1,205807828 | 0,01653 | RPS16     | ribosomal protein S16                                      |
| 1,120389214 | 0,43754 | 1,172022284 | 0,00606 | RPS19BP1  | ribosomal protein S19 binding protein 1                    |
| 0,633317127 | 0,07111 | 0,739181216 | 0,0019  | RPS24     | ribosomal protein S24                                      |
| 0,902500727 | 0,76246 | 0,699792933 | 0,00943 | RPS27     | ribosomal protein S27                                      |

|             |         |             |         |           |                                                                            |
|-------------|---------|-------------|---------|-----------|----------------------------------------------------------------------------|
| 0,972654947 | 0,73591 | 1,147902414 | 0,01721 | RPS27L    | ribosomal protein S27-like                                                 |
| 0,70270935  | 0,13192 | 0,880869374 | 0,00838 | RPS3A     | ribosomal protein S3A                                                      |
| 1,104964485 | 0,57887 | 1,378405153 | 0,00313 | RPS6KA2   | ribosomal protein S6 kinase, 90kDa, polypeptide 2                          |
| 0,739693755 | 0,38864 | 0,683493726 | 0,00007 | RPS6KA5   | ribosomal protein S6 kinase, 90kDa, polypeptide 5                          |
| 0,666649339 | 0,08347 | 0,74277646  | 0,00198 | RPS6KA5   | ribosomal protein S6 kinase, 90kDa, polypeptide 5                          |
| 1,204972315 | 0,12701 | 1,215036792 | 0,00207 | RPS6KA6   | ribosomal protein S6 kinase, 90kDa, polypeptide 6                          |
| 0,811689581 | 0,12112 | 0,859756486 | 0,01213 | RPS6KA6   | ribosomal protein S6 kinase, 90kDa, polypeptide 6                          |
| 0,87175824  | 0,44362 | 0,77916458  | 0,00077 | RPS6KB1   | ribosomal protein S6 kinase, 70kDa, polypeptide 1                          |
| 0,934975198 | 0,72645 | 0,859756486 | 0,02102 | RPS6KB1   | ribosomal protein S6 kinase, 70kDa, polypeptide 1                          |
| 0,802181166 | 0,27069 | 0,76101669  | 0,00124 | RPS6KC1   | ribosomal protein S6 kinase, 52kDa, polypeptide 1                          |
| 1,129747215 | 0,24428 | 1,261377409 | 0,00298 | RPS6KL1   | ribosomal protein S6 kinase-like 1                                         |
| 0,96996191  | 0,76568 | 0,879649076 | 0,02621 | RPUSD2    | RNA pseudouridylylate synthase domain containing 2                         |
| 1,059218335 | 0,43879 | 1,174461971 | 0,01043 | RPUSD3    | RNA pseudouridylylate synthase domain containing 3                         |
| 0,817335328 | 0,09708 | 0,841479482 | 0,00891 | RPUSD4    | RNA pseudouridylylate synthase domain containing 4                         |
| 0,97874165  | 0,92122 | 0,820172911 | 0,02555 | RQCD1     | RCD1 required for cell differentiation1 homolog (S. pombe)                 |
| 1,148698355 | 0,13451 | 1,221793102 | 0,0015  | RRAD      | Ras-related associated with diabetes                                       |
| 0,789493887 | 0,06257 | 0,866937564 | 0,04988 | RRAGC     | Ras-related GTP binding C                                                  |
| 0,81379198  | 0,37773 | 0,654742712 | 0,00001 | RRAGD     | Ras-related GTP binding D                                                  |
| 1,190031696 | 0,36506 | 1,399585866 | 0       | RRAS      | related RAS viral (r-ras) oncogene homolog                                 |
| 0,949342121 | 0,79289 | 0,803293997 | 0,00061 | RRAS2     | related RAS viral (r-ras) oncogene homolog 2                               |
| 1,151887642 | 0,576   | 1,378405153 | 0,0023  | RRBP1     | ribosome binding protein 1 homolog 180kDa (dog)                            |
| 1,439931319 | 0,15305 | 1,123765669 | 0,00003 | RRBP1     | ribosome binding protein 1 homolog 180kDa (dog)                            |
| 1,350037985 | 0,11597 | 1,437936533 | 0,00045 | RRBP1     | ribosome binding protein 1 homolog 180kDa (dog)                            |
| 1,426025717 | 0,1283  | 1,388955136 | 0,00029 | RRBP1     | ribosome binding protein 1 homolog 180kDa (dog)                            |
| 0,910038824 | 0,43788 | 0,868140228 | 0,00268 | RREB1     | ras responsive element binding protein 1                                   |
| 0,953298545 | 0,8396  | 0,745872013 | 0,0023  | RREB1     | ras responsive element binding protein 1                                   |
| 0,713012859 | 0,08713 | 0,732550437 | 0,04203 | RREB1     | ras responsive element binding protein 1                                   |
| 0,997922719 | 0,99001 | 0,804408371 | 0,02    | RRM2      | ribonucleotide reductase M2                                                |
| 1,124278924 | 0,26245 | 1,115739322 | 0,04564 | RRN3P2    | RNA polymerase I transcription factor homolog (S. cerevisiae) pseudogene 2 |
| 0,891310496 | 0,32285 | 0,825877665 | 0,02683 | RRP1      | ribosomal RNA processing 1 homolog (S. cerevisiae)                         |
| 0,801625329 | 0,09051 | 0,835666959 | 0,01209 | RRP12     | ribosomal RNA processing 12 homolog (S. cerevisiae)                        |
| 0,892546971 | 0,51574 | 0,768970416 | 0,00071 | RRP15     | ribosomal RNA processing 15 homolog (S. cerevisiae)                        |
| 0,791685866 | 0,26214 | 0,617281303 | 0       | RRP15     | ribosomal RNA processing 15 homolog (S. cerevisiae)                        |
| 0,891928519 | 0,36079 | 0,87175824  | 0,00175 | RRP1B     | ribosomal RNA processing 1 homolog B (S. cerevisiae)                       |
| 0,793883931 | 0,05263 | 0,814507563 | 0,00261 | RRP36     | ribosomal RNA processing 36 homolog (S. cerevisiae)                        |
| 0,806082831 | 0,30448 | 0,807760778 | 0,03604 | RSBN1     | round spermatid basic protein 1                                            |
| 1,136816973 | 0,4381  | 0,834509281 | 0,02355 | RSBN1L    | round spermatid basic protein 1-like                                       |
| 0,975355462 | 0,88232 | 1,146312186 | 0,03275 | RSBN1L    | round spermatid basic protein 1-like                                       |
| 0,739693755 | 0,14341 | 0,747942879 | 0,00823 | RSF1      | remodeling and spacing factor 1                                            |
| 1,062159186 | 0,45885 | 1,149494848 | 0,01112 | RSG1      | REM2 and RAB-like small GTPase 1                                           |
| 0,722966147 | 0,26667 | 0,866937564 | 0,03836 | RSL1D1    | ribosomal L1 domain containing 1                                           |
| 0,904379378 | 0,65063 | 0,738669032 | 0,00113 | RSL1D1    | ribosomal L1 domain containing 1                                           |
| 0,71449707  | 0,18634 | 0,735093668 | 0,01521 | RSL24D1   | ribosomal L24 domain containing 1                                          |
| 0,905633983 | 0,56926 | 0,827596816 | 0,01197 | RSL24D1   | ribosomal L24 domain containing 1                                          |
| 1,065108203 | 0,54264 | 1,204137381 | 0,00481 | RSPH3     | radial spoke 3 homolog (Chlamydomonas)                                     |
| 0,720464874 | 0,0744  | 0,8362464   | 0,04764 | RSPH3     | radial spoke 3 homolog (Chlamydomonas)                                     |
| 1,110338834 | 0,37128 | 1,185092771 | 0,04384 | RSPO4     | R-spondin 4                                                                |
| 0,868742185 | 0,42089 | 0,817902059 | 0,02389 | RSRY1     | ring finger and SPRY domain containing 1                                   |
| 0,993092495 | 0,97607 | 0,808881348 | 0,03004 | RSRC1     | arginine/serine-rich coiled-coil 1                                         |
| 0,834509281 | 0,43018 | 0,823020345 | 0,00206 | RSRC2     | arginine/serine-rich coiled-coil 2                                         |
| 0,774319028 | 0,09125 | 0,804966138 | 0,02015 | RSRC2     | arginine/serine-rich coiled-coil 2                                         |
| 0,856188285 | 0,1786  | 0,759435845 | 0,00128 | RSU1      | Ras suppressor protein 1                                                   |
| 0,773782497 | 0,12998 | 0,827596816 | 0,00497 | RSU1      | Ras suppressor protein 1                                                   |
| 0,979420298 | 0,87715 | 1,191682575 | 0,00831 | RTKL1     | regulator of telomere elongation helicase 1                                |
| 0,786217292 | 0,20709 | 0,786217292 | 0,00072 | RTF1      | Rtf1, Paf1/RNA polymerase II complex component, homolog (S. cerevisiae)    |
| 1,060687741 | 0,70478 | 0,87417862  | 0,03827 | RTKN2     | rhotekin 2                                                                 |
| 1,028826708 | 0,74812 | 1,147902414 | 0,03582 | RTN2      | reticulon 2                                                                |
| 0,803850991 | 0,31182 | 0,614719434 | 0       | RTN4      | reticulon 4                                                                |
| 0,77271055  | 0,30505 | 0,763129604 | 0,00019 | RTN4      | reticulon 4                                                                |
| 0,839731493 | 0,21731 | 0,836826243 | 0,0007  | RTN4      | reticulon 4                                                                |
| 1,011152081 | 0,94202 | 0,849684999 | 0,00376 | RTN4      | reticulon 4                                                                |
| 0,980779004 | 0,84682 | 1,155886707 | 0,03113 | RTP3      | receptor (chemosensory) transporter protein 3                              |
| 0,846158597 | 0,1489  | 0,912565489 | 0,04835 | RUFY1     | RUN and FYVE domain containing 1                                           |
| 0,832775771 | 0,07632 | 0,870550563 | 0,02615 | RUFY2     | RUN and FYVE domain containing 2                                           |
| 0,938871747 | 0,54469 | 0,849684999 | 0,00633 | RUFY2     | RUN and FYVE domain containing 2                                           |
| 0,860352631 | 0,1492  | 0,742261785 | 0,00009 | RUFY3     | RUN and FYVE domain containing 3                                           |
| 0,905006463 | 0,76884 | 0,863339559 | 0,035   | RUFY3     | RUN and FYVE domain containing 3                                           |
| 0,757333158 | 0,20726 | 0,860949188 | 0,01198 | RUFY3     | RUN and FYVE domain containing 3                                           |
| 0,707106781 | 0,32708 | 0,778624691 | 0,04282 | RUFY3     | RUN and FYVE domain containing 3                                           |
| 1,383190629 | 0,09686 | 1,159899655 | 0,04858 | RUND3B    | RUN domain containing 3B                                                   |
| 1,050444544 | 0,70266 | 1,237990291 | 0,00558 | RUNX1     | runt-related transcription factor 1                                        |
| 1,181811547 | 0,15091 | 1,184271612 | 0,0206  | RUNX1     | runt-related transcription factor 1                                        |
| 1,168777249 | 0,26347 | 1,265756594 | 0,00096 | RUNX1     | runt-related transcription factor 1                                        |
| 1,170398641 | 0,1425  | 1,453972517 | 0,00015 | RUNX1     | runt-related transcription factor 1                                        |
| 1,158292806 | 0,0615  | 1,216722359 | 0,00083 | RUNX1     | runt-related transcription factor 1                                        |
| 1,132098902 | 0,26083 | 1,349102534 | 0,00006 | RUNX1T1   | runt-related transcription factor 1; translocated to, 1 (cyclin D-related) |
| 1,090507733 | 0,34507 | 1,186736798 | 0,0003  | RUNX2     | runt-related transcription factor 2                                        |
| 1,076986376 | 0,38029 | 1,219255094 | 0,00152 | RUNX2     | runt-related transcription factor 2                                        |
| 1,058484395 | 0,47768 | 1,127400412 | 0,01189 | RUNX2     | runt-related transcription factor 2                                        |
| 1,615521555 | 0,05899 | 1,294145654 | 0,04408 | RUNX2     | runt-related transcription factor 2                                        |
| 1,431968741 | 0,07432 | 1,702907415 | 0,00009 | RUNX3     | runt-related transcription factor 3                                        |
| 0,778624691 | 0,28691 | 0,829319546 | 0,00869 | RUSC1-AS1 | RUSC1 antisense RNA 1 (non-protein coding)                                 |
| 1,143930973 | 0,18732 | 1,246601194 | 0,00319 | RUSC2     | RUN and SH3 domain containing 2                                            |
| 1,153485605 | 0,58244 | 0,821310701 | 0,02232 | RWDD1     | RWD domain containing 1                                                    |
| 0,627635996 | 0,13776 | 0,682073917 | 0,01203 | RWDD2B    | RWD domain containing 2B                                                   |
| 0,706127202 | 0,13781 | 0,697371833 | 0       | RWDD4     | RWD domain containing 4                                                    |
| 0,944092419 | 0,61521 | 0,852634892 | 0,02485 | RXRA      | retinoid X receptor, alpha                                                 |
| 1,065846736 | 0,73972 | 1,251796459 | 0,04389 | RXR8      | retinoid X receptor, beta                                                  |
| 0,808881348 | 0,27164 | 0,705637922 | 0,00044 | RYK       | RYK receptor-like tyrosine kinase                                          |
| 0,832198735 | 0,22135 | 0,825305409 | 0,00478 | RYK       | RYK receptor-like tyrosine kinase                                          |
| 1,064370182 | 0,53085 | 1,130530567 | 0,02094 | S100A1    | S100 calcium binding protein A1                                            |
| 0,720964436 | 0,0746  | 0,869947353 | 0,00191 | S100A10   | S100 calcium binding protein A10                                           |
| 1,150291893 | 0,15531 | 1,136816973 | 0,01947 | S100BP    | S100P binding protein                                                      |
| 1,194991205 | 0,08724 | 1,171210181 | 0,00921 | S1PR2     | sphingosine-1-phosphate receptor 2                                         |
| 0,863938187 | 0,49473 | 0,821880187 | 0,00756 | SACM1L    | SAC1 suppressor of actin mutations 1-like (yeast)                          |
| 0,925946023 | 0,80779 | 0,698339266 | 0,0073  | SACS      | spastic ataxia of Charlevoix-Saguenay (sacsin)                             |
| 0,86934456  | 0,227   | 0,880869374 | 0,03357 | SAFB      | scaffold attachment factor B                                               |
| 1,017479692 | 0,82512 | 1,160703914 | 0,03216 | SAG       | S-antigen; retina and pineal gland (arrestin)                              |
| 0,982139595 | 0,79237 | 1,102669163 | 0,01594 | SALL3     | sal-like 3 (Drosophila)                                                    |
| 1,070288698 | 0,39426 | 1,208317843 | 0,00362 | SALL4     | sal-like 4 (Drosophila)                                                    |
| 1,118061851 | 0,32491 | 1,176906737 | 0,04208 | SAMD10    | sterile alpha motif domain containing 10                                   |
| 0,905633983 | 0,39449 | 1,136816973 | 0,03135 | SAMD11    | sterile alpha motif domain containing 11                                   |
| 0,74319028  | 0,27449 | 0,617281303 | 0,00045 | SAMD12    | sterile alpha motif domain containing 12                                   |
| 1,048989328 | 0,62674 | 1,153485605 | 0,00908 | SAMD14    | sterile alpha motif domain containing 14                                   |



|             |         |             |         |          |                                                                               |
|-------------|---------|-------------|---------|----------|-------------------------------------------------------------------------------|
| 1,083725967 | 0,46361 | 1,303147149 | 0,00643 | SAMD14   | sterile alpha motif domain containing 14                                      |
| 1,098092814 | 0,38885 | 1,180992661 | 0,01932 | SAMD14   | sterile alpha motif domain containing 14                                      |
| 1,240567298 | 0,08635 | 1,16634937  | 0,03509 | SAMD15   | sterile alpha motif domain containing 15                                      |
| 1,278985581 | 0,1547  | 1,16634937  | 0,02293 | SAMD3    | sterile alpha motif domain containing 3                                       |
| 0,834509281 | 0,2923  | 0,737645729 | 0,00876 | SAMD5    | sterile alpha motif domain containing 5                                       |
| 0,62676651  | 0,07306 | 0,668963777 | 0,00144 | SAMD9    | sterile alpha motif domain containing 9                                       |
| 1,563739286 | 0,06669 | 1,411275843 | 0,00581 | SAMHD1   | SAM domain and HD domain 1                                                    |
| 0,890692901 | 0,15161 | 0,902500727 | 0,01592 | SAP130   | Sin3A-associated protein, 130kDa                                              |
| 0,651573575 | 0,05907 | 0,840896415 | 0,04117 | SAP18    | Sin3A-associated protein, 18kDa                                               |
| 1,128182137 | 0,48226 | 0,829319546 | 0,00351 | SAP30    | Sin3A-associated protein, 30kDa                                               |
| 0,759435845 | 0,16013 | 0,826450318 | 0,04533 | SARS     | seryl-tRNA synthetase                                                         |
| 0,729004689 | 0,20441 | 0,835666959 | 0,01012 | SART3    | squamous cell carcinoma antigen recognized by T cells 3                       |
| 1,031683179 | 0,83916 | 0,911933166 | 0,04092 | SASS6    | spindle assembly 6 homolog (C. elegans)                                       |
| 1,356604327 | 0,08314 | 1,173648178 | 0,01682 | SAT1     | spermidine/spermine N1-acetyltransferase 1                                    |
| 1,280759861 | 0,395   | 1,272794935 | 0,00016 | SAT1     | spermidine/spermine N1-acetyltransferase 1                                    |
| 0,848507902 | 0,17529 | 0,852044095 | 0,00625 | SBF1     | SET binding factor 1                                                          |
| 0,836826243 | 0,43018 | 1,190031696 | 0,02644 | SBF1     | SET binding factor 1                                                          |
| 0,860949188 | 0,57659 | 0,753667455 | 0,00202 | SBF2     | SET binding factor 2                                                          |
| 0,924022572 | 0,67821 | 0,693515485 | 0,00003 | SBNO1    | strawberry notch homolog 1 (Drosophila)                                       |
| 0,858565436 | 0,37857 | 0,833931044 | 0,01453 | SBNO1    | strawberry notch homolog 1 (Drosophila)                                       |
| 0,804408371 | 0,21995 | 0,835666959 | 0,00478 | SBNO1    | strawberry notch homolog 1 (Drosophila)                                       |
| 1,28877463  | 0,21031 | 1,327765158 | 0,00835 | SBNO2    | strawberry notch homolog 2 (Drosophila)                                       |
| 0,680185426 | 0,07422 | 0,700763725 | 0,00385 | SC5DL    | sterol-C5-desaturase (ERG3 delta-5-desaturase homolog, S. cerevisiae)-like    |
| 0,578344092 | 0,10319 | 0,881480158 | 0,02088 | SCAF11   | SR-related CTD-associated factor 11                                           |
| 0,603740296 | 0,15261 | 0,799960128 | 0,00312 | SCAF11   | SR-related CTD-associated factor 11                                           |
| 0,846158597 | 0,41921 | 0,844986384 | 0,00254 | SCAF11   | SR-related CTD-associated factor 11                                           |
| 0,889458994 | 0,6112  | 0,71548826  | 0,00213 | SCAF4    | SR-related CTD-associated factor 4                                            |
| 0,876605721 | 0,3633  | 0,853226098 | 0,03705 | SCAF4    | SR-related CTD-associated factor 4                                            |
| 0,872967591 | 0,53441 | 0,708578698 | 0,00044 | SCAF4    | SR-related CTD-associated factor 4                                            |
| 0,883927531 | 0,47316 | 0,746906729 | 0,00174 | SCAF8    | SR-related CTD-associated factor 8                                            |
| 1,095052471 | 0,37249 | 0,859756486 | 0,00733 | SCAI     | suppressor of cancer cell invasion                                            |
| 0,641268301 | 0,05109 | 0,632878297 | 0,00771 | SCAMP1   | secretory carrier membrane protein 1                                          |
| 0,746906729 | 0,39396 | 0,717474767 | 0,01851 | SCAMP1   | secretory carrier membrane protein 1                                          |
| 0,80779004  | 0,85444 | 1,264879542 | 0,00036 | SCAMP5   | secretory carrier membrane protein 5                                          |
| 1,163926534 | 0,15803 | 1,143138335 | 0,01045 | SCAMPER  | sphingolipid Ca2+ release mediating protein of endoplasmic reticulum          |
| 1,071030823 | 0,44435 | 1,150291893 | 0,02828 | SCAND2   | SCAN domain containing 2 pseudogene                                           |
| 0,867538687 | 0,49803 | 0,743291492 | 0,00016 | SCAPER   | S-phase cyclin A-associated protein in the ER                                 |
| 0,828170661 | 0,2327  | 0,857376037 | 0,02979 | SCAPER   | S-phase cyclin A-associated protein in the ER                                 |
| 1,174461971 | 0,27547 | 0,880259014 | 0,04541 | SCARA3   | scavenger receptor class A, member 3                                          |
| 1,304050735 | 0,09556 | 1,473247686 | 0,0031  | SCARA5   | scavenger receptor class A, member 5 (putative)                               |
| 1,057018041 | 0,57549 | 1,118837101 | 0,02255 | SCARF1   | scavenger receptor class F, member 1                                          |
| 0,674083866 | 0,06243 | 0,662044455 | 0,00048 | SCARNA15 | small Cajal body-specific RNA 15                                              |
| 1,216722359 | 0,08413 | 1,344434994 | 0,00048 | SCCPDH   | saccharopine dehydrogenase (putative)                                         |
| 1,086734863 | 0,2136  | 1,179356592 | 0,00098 | SCD5     | stearoyl-CoA desaturase 5                                                     |
| 0,709561678 | 0,23258 | 0,70514898  | 0,03438 | SCEL     | sciellin                                                                      |
| 0,669891801 | 0,09287 | 0,827596816 | 0,00013 | SCFD1    | sec1 family domain containing 1                                               |
| 0,883927531 | 0,46037 | 0,671751713 | 0       | SCFD2    | sec1 family domain containing 2                                               |
| 0,990342872 | 0,90167 | 1,231998073 | 0,00298 | SCGBL    | secretoglobulin-like                                                          |
| 1,026689546 | 0,9202  | 0,773782497 | 0,00335 | SCLT1    | sodium channel and clathrin linker 1                                          |
| 1,033830736 | 0,7374  | 1,140763716 | 0,04302 | SCML4    | sex comb on midleg-like 4 (Drosophila)                                        |
| 1,119612889 | 0,20349 | 1,121943481 | 0,02348 | SCN10A   | sodium channel, voltage-gated, type X, alpha subunit                          |
| 0,947370071 | 0,61471 | 1,133669413 | 0,0281  | SCN3B    | sodium channel, voltage-gated, type III, beta                                 |
| 0,821310701 | 0,0733  | 0,784040454 | 0,02294 | SCN4B    | sodium channel, voltage-gated, type IV, beta                                  |
| 1,029540083 | 0,66606 | 1,114193651 | 0,04392 | SCN8A    | sodium channel, voltage-gated, type VIII, alpha subunit                       |
| 0,832198735 | 0,45497 | 0,866336856 | 0,01911 | SCO1     | SCO cytochrome oxidase deficient homolog 1 (yeast)                            |
| 0,798298386 | 0,20719 | 0,77916458  | 0,02467 | SCOC     | short coiled-coil protein                                                     |
| 0,777007269 | 0,18546 | 0,796640096 | 0,00072 | SCP2     | sterol carrier protein 2                                                      |
| 1,123499903 | 0,12312 | 1,157490217 | 0,01538 | SCRN2    | secernin 2                                                                    |
| 0,7944344   | 0,0755  | 0,817902059 | 0,01447 | SCRN3    | secernin 3                                                                    |
| 0,821880187 | 0,28345 | 0,78132788  | 0,00704 | SCRN3    | secernin 3                                                                    |
| 1,026689546 | 0,80112 | 1,147107024 | 0,03537 | SCUBE3   | signal peptide, CUB domain, EGF-like 3                                        |
| 0,829894586 | 0,39392 | 0,806082831 | 0,04061 | SCYL2    | SCY1-like 2 (S. cerevisiae)                                                   |
| 0,921464186 | 0,72077 | 0,848507902 | 0,03551 | SCYL3    | SCY1-like 3 (S. cerevisiae)                                                   |
| 0,726986259 | 0,44503 | 0,801069878 | 0,00356 | SDAD1    | SDA1 domain containing 1                                                      |
| 0,586417475 | 0,18083 | 0,869947353 | 0,01223 | SDC1     | syndecan 1                                                                    |
| 1,215879283 | 0,19376 | 1,217566019 | 0,00925 | SDC2     | syndecan 2                                                                    |
| 1,00486382  | 0,95808 | 1,116512962 | 0,02374 | SDC3     | syndecan 3                                                                    |
| 1,0453601   | 0,73764 | 1,146312186 | 0,02091 | SDCBP    | syndecan binding protein (syntenin)                                           |
| 0,835666959 | 0,14153 | 0,663882579 | 0,0004  | SDCCAG3  | serologically defined colon cancer antigen 3                                  |
| 1,079228237 | 0,43112 | 0,842062954 | 0,00998 | SDCCAG8  | serologically defined colon cancer antigen 8                                  |
| 0,81056512  | 0,33721 | 0,79774524  | 0,02073 | SDCCAG8  | serologically defined colon cancer antigen 8                                  |
| 0,905006463 | 0,78744 | 0,578344092 | 0,00053 | SDCCAG8  | serologically defined colon cancer antigen 8                                  |
| 1,529436278 | 0,15408 | 1,701727459 | 0       | SDF2L1   | stromal cell-derived factor 2-like 1                                          |
| 1,11879158  | 0,52726 | 1,227735684 | 0,00141 | SDF4     | stromal cell derived factor 4                                                 |
| 1,22858698  | 0,61678 | 1,199971382 | 0,00398 | SDF4     | stromal cell derived factor 4                                                 |
| 1,178539408 | 0,43149 | 1,236275261 | 0,00082 | SDF4     | stromal cell derived factor 4                                                 |
| 1,037419937 | 0,8944  | 1,251796459 | 0,0002  | SDF4     | stromal cell derived factor 4                                                 |
| 1,006257823 | 0,96701 | 1,108800644 | 0,04416 | SDHA     | succinate dehydrogenase complex, subunit A, flavoprotein (Fp)                 |
| 1,116512962 | 0,27438 | 1,131314463 | 0,01251 | SDHAP1   | succinate dehydrogenase complex, subunit A, flavoprotein pseudogene 1         |
| 0,746906729 | 0,23239 | 0,8362464   | 0,00962 | SDHB     | succinate dehydrogenase complex, subunit B, iron sulfur (Ip)                  |
| 0,85027416  | 0,22474 | 0,801069878 | 0,0016  | SDHC     | succinate dehydrogenase complex, subunit C, integral membrane protein, 15kDa  |
| 0,908778116 | 0,45573 | 0,786217292 | 0,02233 | SDHD     | succinate dehydrogenase complex, subunit D, integral membrane protein         |
| 1,269270886 | 0,10678 | 1,262252032 | 0,00207 | SDK1     | sidekick homolog 1, cell adhesion molecule (chicken)                          |
| 1,139973273 | 0,15144 | 1,32317144  | 0,00002 | SDK2     | sidekick homolog 2 (chicken)                                                  |
| 0,999307093 | 0,99664 | 1,179356592 | 0,01253 | SDK2     | sidekick homolog 2 (chicken)                                                  |
| 1,185092771 | 0,10811 | 1,132098902 | 0,03349 | SDS      | serine dehydratase                                                            |
| 1,226884977 | 0,10927 | 1,161508732 | 0,03559 | SEC1     | secretory blood group 1                                                       |
| 0,934975198 | 0,41663 | 1,125838586 | 0,03612 | SEC14L3  | SEC14-like 3 (S. cerevisiae)                                                  |
| 0,959292961 | 0,63132 | 1,155886707 | 0,02429 | SEC16B   | SEC16 homolog B (S. cerevisiae)                                               |
| 1,164733586 | 0,5185  | 1,220946513 | 0,00742 | SEC16B   | SEC16 homolog B (S. cerevisiae)                                               |
| 0,807760778 | 0,10668 | 0,871154192 | 0,00692 | SEC22A   | SEC22 vesicle trafficking protein homolog A (S. cerevisiae)                   |
| 1,224336392 | 0,2429  | 1,159899655 | 0,01128 | SEC22B   | SEC22 vesicle trafficking protein homolog B (S. cerevisiae) (gene/pseudogene) |
| 1,033830736 | 0,74946 | 1,154285418 | 0,00449 | SEC22C   | SEC22 vesicle trafficking protein homolog C (S. cerevisiae)                   |
| 1,165541198 | 0,27585 | 1,107264584 | 0,04422 | SEC22C   | SEC22 vesicle trafficking protein homolog C (S. cerevisiae)                   |
| 0,997231251 | 0,96919 | 1,130530567 | 0,0371  | SEC22C   | SEC22 vesicle trafficking protein homolog C (S. cerevisiae)                   |
| 0,84264683  | 0,38349 | 0,763129604 | 0,01059 | SEC24B   | SEC24 family, member B (S. cerevisiae)                                        |
| 1,100378609 | 0,57473 | 1,370782805 | 0,00498 | SEC24D   | SEC24 family, member D (S. cerevisiae)                                        |
| 1,212512819 | 0,15526 | 1,32592576  | 0,00043 | SEC31B   | SEC31 homolog B (S. cerevisiae)                                               |
| 1,172834949 | 0,4835  | 1,293248932 | 0,00076 | SEC61A1  | Sec61 alpha 1 subunit (S. cerevisiae)                                         |
| 1,270150983 | 0,51336 | 1,292352831 | 0,02605 | SEC61A1  | Sec61 alpha 1 subunit (S. cerevisiae)                                         |
| 1,040300267 | 0,87071 | 1,183451022 | 0,01188 | SEC62    | SEC62 homolog (S. cerevisiae)                                                 |
| 1,276328769 | 0,0563  | 1,167967395 | 0,00861 | SEC62    | SEC62 homolog (S. cerevisiae)                                                 |
| 0,921464186 | 0,5048  | 0,845572287 | 0,00287 | SECISBP2 | SECIS binding protein 2                                                       |
| 1,073260286 | 0,81819 | 0,788400174 | 0,0001  | SECISBP2 | SECIS binding protein 2                                                       |

|             |         |             |         |           |                                                                                                                  |
|-------------|---------|-------------|---------|-----------|------------------------------------------------------------------------------------------------------------------|
| 1,027401439 | 0,89359 | 0,839149637 | 0,0252  | SECISBP2L | SECIS binding protein 2-like                                                                                     |
| 0,658383461 | 0,12795 | 0,602486157 | 0,00752 | SECISBP2L | SECIS binding protein 2-like                                                                                     |
| 0,704172113 | 0,13878 | 0,683967652 | 0       | SEH1L     | SEH1-like (S. cerevisiae)                                                                                        |
| 1,23370717  | 0,16891 | 1,303147149 | 0,00125 | SELPLG    | selectin P ligand                                                                                                |
| 1,208317843 | 0,20172 | 1,187559666 | 0,01408 | SELS      | selenoprotein S                                                                                                  |
| 0,639936207 | 0,18446 | 0,642157904 | 0,00874 | SEMA3C    | sema domain, immunoglobulin domain (Ig), short basic domain, secreted, (semaphorin) 3C                           |
| 1,067325338 | 0,39583 | 0,925304428 | 0,03389 | SEMA3E    | sema domain, immunoglobulin domain (Ig), short basic domain, secreted, (semaphorin) 3E                           |
| 1,296839555 | 0,2229  | 1,28788163  | 0,02201 | SEMA3G    | sema domain, immunoglobulin domain (Ig), short basic domain, secreted, (semaphorin) 3G                           |
| 1,185914499 | 0,08785 | 1,183451022 | 0,00723 | SEMA4C    | sema domain, immunoglobulin domain (Ig), transmembrane domain (TM) and short cytoplasmic domain, (semaphorin) 4C |
| 1,171210181 | 0,14573 | 1,134455485 | 0,02099 | SEMA4F    | sema domain, immunoglobulin domain (Ig), transmembrane domain (TM) and short cytoplasmic domain, (semaphorin) 4F |
| 1,061423209 | 0,52625 | 1,299539062 | 0,013   | SEMA6A    | sema domain, transmembrane domain (TM), and cytoplasmic domain, (semaphorin) 6A                                  |
| 1,109569472 | 0,47054 | 1,222640278 | 0,00505 | SEMA6A    | sema domain, transmembrane domain (TM), and cytoplasmic domain, (semaphorin) 6A                                  |
| 1,22010051  | 0,06906 | 1,257884972 | 0,00189 | SEMA6D    | sema domain, transmembrane domain (TM), and cytoplasmic domain, (semaphorin) 6D                                  |
| 1,051172909 | 0,64347 | 1,363202607 | 0,00123 | SEMA6D    | sema domain, transmembrane domain (TM), and cytoplasmic domain, (semaphorin) 6D                                  |
| 0,91383145  | 0,52932 | 0,734075318 | 0,00001 | SENP2     | SUMO1/sentrin/SMT3 specific peptidase 2                                                                          |
| 0,888226796 | 0,31902 | 0,798298386 | 0,00782 | SENP5     | SUMO1/sentrin specific peptidase 5                                                                               |
| 0,71548826  | 0,05373 | 0,780786493 | 0,00143 | SENP6     | SUMO1/sentrin specific peptidase 6                                                                               |
| 0,96727633  | 0,87497 | 0,791137301 | 0,00895 | SENP6     | SUMO1/sentrin specific peptidase 6                                                                               |
| 1,068065408 | 0,68466 | 0,779704843 | 0,00308 | SENP6     | SUMO1/sentrin specific peptidase 6                                                                               |
| 1,120389214 | 0,43133 | 1,189207115 | 0,01978 | SEPP1     | selenoprotein P, plasma, 1                                                                                       |
| 1,033830736 | 0,85534 | 0,863938187 | 0,02118 | SEPSEC5   | Sep (O-phosphoserine) tRNA:Sec (selenocysteine) tRNA synthase                                                    |
| 1,204972315 | 0,06305 | 1,215879283 | 0,00317 | SEPT7P2   | septin 7 pseudogene 2                                                                                            |
| 1,172834949 | 0,11385 | 1,147107024 | 0,01254 | SEPT7P2   | septin 7 pseudogene 2                                                                                            |
| 0,961260928 | 0,67608 | 0,873572896 | 0,01757 | SEPT7P2   | septin 7 pseudogene 2                                                                                            |
| 1,060687741 | 0,66873 | 0,873572896 | 0,01128 | SERAC1    | serine active site containing 1                                                                                  |
| 0,774855931 | 0,18485 | 0,808320869 | 0,01591 | SERAC1    | serine active site containing 1                                                                                  |
| 0,501735874 | 0,07489 | 0,747424624 | 0,00094 | SERBP1    | SERPINE1 mRNA binding protein 1                                                                                  |
| 0,724973416 | 0,09463 | 0,784040454 | 0,00048 | SERBP1    | SERPINE1 mRNA binding protein 1                                                                                  |
| 0,615999037 | 0,13444 | 0,632439771 | 0       | SERBP1    | SERPINE1 mRNA binding protein 1                                                                                  |
| 1,308578071 | 0,25727 | 1,52308874  | 0,00008 | SERINC2   | serine incorporator 2                                                                                            |
| 0,671751713 | 0,09066 | 0,722465199 | 0,00005 | SERINC5   | serine incorporator 5                                                                                            |
| 0,963929808 | 0,77137 | 0,887611337 | 0,03889 | SERP1     | stress-associated endoplasmic reticulum protein 1                                                                |
| 1,10343374  | 0,19788 | 1,140763716 | 0,02423 | SERPINA1  | serpin peptidase inhibitor, clade A (alpha-1 antitrypsin, antitrypsin), member 1                                 |
| 0,910038824 | 0,33652 | 1,140763716 | 0,01664 | SERPINA12 | serpin peptidase inhibitor, clade A (alpha-1 antitrypsin, antitrypsin), member 12                                |
| 1,155085785 | 0,16697 | 1,158292806 | 0,04731 | SERPINA4  | serpin peptidase inhibitor, clade A (alpha-1 antitrypsin, antitrypsin), member 4                                 |
| 1,123499903 | 0,24884 | 1,170398641 | 0,00438 | SERPINA9  | serpin peptidase inhibitor, clade A (alpha-1 antitrypsin, antitrypsin), member 9                                 |
| 0,995159722 | 0,95761 | 0,841479482 | 0,00945 | SERPINB1  | serpin peptidase inhibitor, clade B (ovalbumin), member 1                                                        |
| 0,604158922 | 0,15231 | 0,593368399 | 0,00028 | SERPINB13 | serpin peptidase inhibitor, clade B (ovalbumin), member 13                                                       |
| 0,629378587 | 0,08814 | 0,675955417 | 0,00242 | SERPINB13 | serpin peptidase inhibitor, clade B (ovalbumin), member 13                                                       |
| 0,8362464   | 0,15887 | 0,70270935  | 0,02518 | SERPINB2  | serpin peptidase inhibitor, clade B (ovalbumin), member 2                                                        |
| 1,038139271 | 0,70701 | 0,831045862 | 0,02453 | SERPINB6  | serpin peptidase inhibitor, clade B (ovalbumin), member 6                                                        |
| 1,084477409 | 0,47021 | 1,144724161 | 0,01013 | SERPINB8  | serpin peptidase inhibitor, clade B (ovalbumin), member 8                                                        |
| 1,150291893 | 0,17608 | 1,213353556 | 0,01582 | SERPINB9  | serpin peptidase inhibitor, clade B (ovalbumin), member 9                                                        |
| 0,880869374 | 0,68373 | 1,375541818 | 0,00358 | SERPINF1  | serpin peptidase inhibitor, clade F (alpha-2 antipain, pigment epithelium derived factor), member 1              |
| 1,189207115 | 0,1165  | 1,199971382 | 0,00874 | SERPINF2  | serpin peptidase inhibitor, clade F (alpha-2 antipain, pigment epithelium derived factor), member 2              |
| 1,094293701 | 0,72651 | 1,348167732 | 0,00893 | SERPINF1  | serpin peptidase inhibitor, clade G (C1 inhibitor), member 1                                                     |
| 1,010451446 | 0,96611 | 1,604362333 | 0,00224 | SERPINH1  | serpin peptidase inhibitor, clade H (heat shock protein 47), member 1, (collagen binding protein 1)              |
| 0,881480158 | 0,19744 | 0,847332345 | 0,02687 | SERTAD1   | SERTA domain containing 1                                                                                        |
| 0,791685866 | 0,19426 | 0,865736566 | 0,03473 | SERTAD2   | SERTA domain containing 2                                                                                        |
| 0,87175824  | 0,50317 | 0,724973416 | 0,0001  | SERTAD4   | SERTA domain containing 4                                                                                        |
| 0,860352631 | 0,39731 | 0,775393206 | 0,01535 | SERTAD4   | SERTA domain containing 4                                                                                        |
| 0,980779004 | 0,84274 | 0,924022572 | 0,03106 | SERTM1    | serine-rich and transmembrane domain containing 1                                                                |
| 1,022428531 | 0,91516 | 0,883315051 | 0,0265  | SESN3     | sestrin 3                                                                                                        |
| 0,984184022 | 0,92617 | 0,85086373  | 0,0133  | SESTD1    | SEC14 and spectrin domains 1                                                                                     |
| 0,751580739 | 0,05271 | 0,808320869 | 0,00123 | SET       | SET nuclear oncogene                                                                                             |
| 0,825877665 | 0,41539 | 0,829894586 | 0,04041 | SET       | SET nuclear oncogene                                                                                             |
| 0,785128119 | 0,37882 | 0,773246337 | 0,02856 | SETBP1    | SET binding protein 1                                                                                            |
| 0,935623498 | 0,61731 | 0,912565489 | 0,02256 | SETD3     | SET domain containing 3                                                                                          |
| 1,052631155 | 0,58132 | 1,30224419  | 0,00133 | SETD5     | SET domain containing 5                                                                                          |
| 0,86934456  | 0,72623 | 1,148698355 | 0,00861 | SETD5     | SET domain containing 5                                                                                          |
| 0,633317127 | 0,19508 | 0,677362489 | 0,0004  | SETD8     | SET domain containing (lysine methyltransferase) 8                                                               |
| 0,920825697 | 0,52129 | 1,205807828 | 0,00143 | SETDB1    | SET domain, bifurcated 1                                                                                         |
| 0,945402117 | 0,48278 | 0,885153765 | 0,04483 | SETDB2    | SET domain, bifurcated 2                                                                                         |
| 1,030253954 | 0,84102 | 1,220946513 | 0,00057 | SETMAR    | SET domain and mariner transposase fusion gene                                                                   |
| 0,90312651  | 0,17782 | 0,883315051 | 0,01236 | SETX      | senataxin                                                                                                        |
| 1,144724161 | 0,13354 | 1,202469249 | 0,00342 | SEZ6L     | seizure related 6 homolog (mouse)-like                                                                           |
| 1,342572503 | 0,06821 | 1,372684431 | 0,00073 | SEZ6L2    | seizure related 6 homolog (mouse)-like 2                                                                         |
| 1,43893358  | 0,08601 | 1,516767545 | 0,00005 | SEZ6L2    | seizure related 6 homolog (mouse)-like 2                                                                         |
| 1,25353302  | 0,06421 | 1,257884972 | 0,0044  | SEZ6L2    | seizure related 6 homolog (mouse)-like 2                                                                         |
| 0,845572287 | 0,51074 | 0,624598063 | 0,0005  | SF1       | splicing factor 1                                                                                                |
| 0,962594443 | 0,7859  | 0,819604608 | 0,00822 | SF3A1     | splicing factor 3a, subunit 1, 120kDa                                                                            |
| 0,817902059 | 0,13269 | 0,865736566 | 0,02826 | SF3A3     | splicing factor 3a, subunit 3, 60kDa                                                                             |
| 0,852634892 | 0,26809 | 0,859160755 | 0,04703 | SF3B1     | splicing factor 3b, subunit 1, 155kDa                                                                            |
| 1,102669163 | 0,37671 | 1,127400412 | 0,04763 | SF3B2     | splicing factor 3b, subunit 2, 145kDa                                                                            |
| 0,860949188 | 0,22098 | 1,171210181 | 0,03978 | SF11      | Sfi1 homolog, spindle assembly associated (yeast)                                                                |
| 1,019597683 | 0,84746 | 0,877213549 | 0,01776 | SFMBT1    | Scm-like with four mbt domains 1                                                                                 |
| 1,198309021 | 0,06874 | 1,163926534 | 0,0042  | SFMBT2    | Scm-like with four mbt domains 2                                                                                 |
| 0,904379378 | 0,3758  | 0,752101876 | 0       | SFPQ      | splicing factor proline/glutamine-rich                                                                           |
| 0,976708529 | 0,89874 | 0,840313752 | 0,01535 | SFR1      | SWI5-dependent recombination repair 1                                                                            |
| 1,116512962 | 0,74634 | 1,493813457 | 0,03136 | SFRP2     | secreted frizzled-related protein 2                                                                              |
| 1,572434584 | 0,14648 | 1,714752073 | 0,01992 | SFRP2     | secreted frizzled-related protein 2                                                                              |
| 0,758909626 | 0,24024 | 0,784584098 | 0,00157 | SFSWAP    | splicing factor, suppressor of white-apricot homolog (Drosophila)                                                |
| 0,804966138 | 0,29981 | 0,894404902 | 0,04843 | SFSWAP    | splicing factor, suppressor of white-apricot homolog (Drosophila)                                                |
| 1,055553718 | 0,44083 | 1,080725402 | 0,03616 | SFTA3     | surfactant associated 3                                                                                          |
| 1,146312186 | 0,27488 | 1,256142381 | 0,00996 | SFTPB     | surfactant protein B                                                                                             |
| 0,979420298 | 0,80511 | 1,186736798 | 0,00219 | SFTPC     | surfactant protein C                                                                                             |
| 1,068805991 | 0,77315 | 0,752101876 | 0,00238 | SFXN1     | sideroflexin 1                                                                                                   |
| 0,832198735 | 0,3038  | 0,809442217 | 0,02872 | SFXN1     | sideroflexin 1                                                                                                   |
| 1,158292806 | 0,06133 | 1,135242102 | 0,03471 | SFXN2     | sideroflexin 2                                                                                                   |
| 1,169587664 | 0,11353 | 1,118837101 | 0,02219 | SFXN5     | sideroflexin 5                                                                                                   |
| 1,001387256 | 0,98565 | 0,906890329 | 0,02957 | SGK2      | serum/glucocorticoid regulated kinase 2                                                                          |
| 0,705637922 | 0,06948 | 0,784040454 | 0,00785 | SGK3      | serum/glucocorticoid regulated kinase family, member 3                                                           |
| 1,006257823 | 0,97918 | 0,886996305 | 0,01409 | SGK494    | uncharacterized serine/threonine-protein kinase Sgk494                                                           |
| 0,735603373 | 0,19648 | 0,685391402 | 0,01239 | SGMS1     | sphingomyelin synthase 1                                                                                         |
| 0,759962428 | 0,34803 | 0,695923196 | 0,0014  | SGMS2     | sphingomyelin synthase 2                                                                                         |
| 0,847919965 | 0,34369 | 0,831045862 | 0,03216 | SGOL2     | shugoshin-like 2 (S. pombe)                                                                                      |
| 0,918276162 | 0,51791 | 0,808881348 | 0,00052 | SGPL1     | sphingosine-1-phosphate lyase 1                                                                                  |
| 0,829319546 | 0,12089 | 0,8362464   | 0,00033 | SGPL1     | sphingosine-1-phosphate lyase 1                                                                                  |
| 1,169587664 | 0,10963 | 1,143930973 | 0,01287 | SGSM1     | small G protein signaling modulator 1                                                                            |
| 0,76101669  | 0,07941 | 0,751059963 | 0,00001 | SGSM2     | small G protein signaling modulator 2                                                                            |
| 1,00556058  | 0,97504 | 1,235418637 | 0,00542 | SGSM3     | small G protein signaling modulator 3                                                                            |
| 1,110338834 | 0,43329 | 1,149494848 | 0,02143 | SH2B1     | SH2B adaptor protein 1                                                                                           |
| 1,066585781 | 0,62414 | 1,180992661 | 0,00275 | SH2B1     | SH2B adaptor protein 1                                                                                           |
| 1,386069886 | 0,09906 | 1,271031689 | 0,0092  | SH2B2     | SH2B adaptor protein 2                                                                                           |

|             |         |             |         |          |                                                                                                         |
|-------------|---------|-------------|---------|----------|---------------------------------------------------------------------------------------------------------|
| 1,130530567 | 0,33207 | 1,155886707 | 0,02362 | SH2D1A   | SH2 domain containing 1A                                                                                |
| 1,038859103 | 0,61067 | 1,185092771 | 0,01405 | SH2D1B   | SH2 domain containing 1B                                                                                |
| 0,799960128 | 0,08206 | 0,847919965 | 0,04717 | SH3BGR1  | SH3 domain binding glutamic acid-rich protein like                                                      |
| 1,139973273 | 0,16217 | 1,187559666 | 0,01778 | SH3BP2   | SH3-domain binding protein 2                                                                            |
| 1,076986376 | 0,5882  | 0,870550563 | 0,0075  | SH3BP2   | SH3-domain binding protein 2                                                                            |
| 0,784584098 | 0,09051 | 0,823020345 | 0,00234 | SH3BP4   | SH3-domain binding protein 4                                                                            |
| 1,054091423 | 0,66871 | 1,197478705 | 0,01143 | SH3GL1P2 | SH3-domain GRB2-like 1 pseudogene 2                                                                     |
| 0,915733686 | 0,64281 | 0,762072415 | 0,0084  | SH3RF1   | SH3 domain containing ring finger 1                                                                     |
| 1,104964485 | 0,41105 | 1,217566019 | 0,01341 | SH3RF3   | SH3 domain containing ring finger 3                                                                     |
| 1,131314463 | 0,64373 | 1,268391399 | 0,03568 | SH3TC1   | SH3 domain and tetratricopeptide repeats 1                                                              |
| 0,644834125 | 0,05661 | 0,737645729 | 0,00005 | SH3YL1   | SH3 domain containing, Ysc84-like 1 (S. cerevisiae)                                                     |
| 0,974679631 | 0,90618 | 0,818469182 | 0,01057 | SHANK2   | SH3 and multiple ankyrin repeat domains 2                                                               |
| 1,02313747  | 0,82978 | 0,893785162 | 0,03554 | SHANK2   | SH3 and multiple ankyrin repeat domains 2                                                               |
| 0,816768991 | 0,06719 | 0,79940583  | 0,00289 | SHB      | Src homology 2 domain containing adaptor protein B                                                      |
| 1,409320755 | 0,1278  | 1,448942155 | 0,00168 | SHC1     | SHC (Src homology 2 domain containing) transforming protein 1                                           |
| 1,374588696 | 0,06581 | 1,304954948 | 0,00068 | SHC1     | SHC (Src homology 2 domain containing) transforming protein 1                                           |
| 0,963261894 | 0,69868 | 0,914465089 | 0,01753 | SHC4     | SHC (Src homology 2 domain containing) family, member 4                                                 |
| 1,372684431 | 0,08207 | 1,216722359 | 0,00801 | SHE      | Src homology 2 domain containing E                                                                      |
| 0,960594864 | 0,64744 | 1,096571589 | 0,03172 | SHH      | sonic hedgehog                                                                                          |
| 0,660211421 | 0,19912 | 0,743806881 | 0,01638 | SHMT1    | serine hydroxymethyltransferase 1 (soluble)                                                             |
| 0,820741609 | 0,06836 | 0,866336856 | 0,01613 | SHMT1    | serine hydroxymethyltransferase 1 (soluble)                                                             |
| 0,753667455 | 0,11924 | 0,831045862 | 0,0166  | SHOC2    | soc-2 suppressor of clear homolog (C. elegans)                                                          |
| 0,712025098 | 0,24116 | 0,673616788 | 0,0013  | SHPRH    | SNF2 histone linker PHD RING helicase                                                                   |
| 0,840313752 | 0,29294 | 0,821310701 | 0,00029 | SHQ1     | SHQ1 homolog (S. cerevisiae)                                                                            |
| 0,879649076 | 0,29596 | 0,830470024 | 0,00022 | SHQ1     | SHQ1 homolog (S. cerevisiae)                                                                            |
| 0,722465199 | 0,05455 | 0,724973416 | 0,0086  | SHROOM3  | shroom family member 3                                                                                  |
| 0,765778999 | 0,30953 | 0,637722196 | 0,00239 | SHROOM3  | shroom family member 3                                                                                  |
| 0,777007269 | 0,1619  | 0,732550437 | 0,00029 | SIAH1    | seven in absentia homolog 1 (Drosophila)                                                                |
| 1,169587664 | 0,38042 | 1,483494934 | 0,00037 | SIGIRR   | single immunoglobulin and toll-interleukin 1 receptor (TIR) domain                                      |
| 1,257013375 | 0,22042 | 1,36983298  | 0,00117 | SIGIRR   | single immunoglobulin and toll-interleukin 1 receptor (TIR) domain                                      |
| 1,31494276  | 0,14581 | 1,459020344 | 0,00004 | SIGLEC1  | sialic acid binding Ig-like lectin 1, sialoadhesin                                                      |
| 1,048989328 | 0,57377 | 1,130530567 | 0,00883 | SIGLEC16 | sialic acid binding Ig-like lectin 16 (gene/pseudogene)                                                 |
| 1,151887642 | 0,1036  | 1,143138335 | 0,01462 | SIGLEC6  | sialic acid binding Ig-like lectin 6                                                                    |
| 1,16634937  | 0,07274 | 1,264879542 | 0,00198 | SIGLEC7  | sialic acid binding Ig-like lectin 7                                                                    |
| 1,076986376 | 0,61122 | 1,180992661 | 0,00118 | SIGLEC9  | sialic acid binding Ig-like lectin 9                                                                    |
| 1,293248932 | 0,05483 | 1,199139914 | 0,00055 | SIGLECP3 | sialic acid binding Ig-like lectin, pseudogene 3                                                        |
| 1,114966219 | 0,39369 | 1,125058485 | 0,03584 | SIK1     | salt-inducible kinase 1                                                                                 |
| 1,072516617 | 0,33442 | 1,143930973 | 0,02372 | SIK2     | salt-inducible kinase 2                                                                                 |
| 0,865736566 | 0,32664 | 0,863938187 | 0,03524 | SIK2     | salt-inducible kinase 2                                                                                 |
| 0,840313752 | 0,1434  | 0,869947353 | 0,01866 | SIK3     | SIK family kinase 3                                                                                     |
| 0,763129604 | 0,25095 | 0,741747467 | 0,00179 | SIKE1    | suppressor of IKBKE 1                                                                                   |
| 0,987600861 | 0,95788 | 0,803293997 | 0,00138 | SIKE1    | suppressor of IKBKE 1                                                                                   |
| 1,335148303 | 0,05444 | 1,278985581 | 0,00182 | SIL1     | SIL1 homolog, endoplasmic reticulum chaperone (S. cerevisiae)                                           |
| 0,996540263 | 0,98735 | 0,783497187 | 0,00019 | SIN3A    | SIN3 homolog A, transcription regulator (yeast)                                                         |
| 1,276328769 | 0,11992 | 1,399585866 | 0,00026 | SIPA1    | signal-induced proliferation-associated 1                                                               |
| 1,092020546 | 0,45856 | 0,779704843 | 0,00247 | SIPA1L1  | signal-induced proliferation-associated 1 like 1                                                        |
| 1,00486382  | 0,97476 | 0,922103118 | 0,0351  | SIPA1L1  | signal-induced proliferation-associated 1 like 1                                                        |
| 1,220946513 | 0,09388 | 1,139183377 | 0,0309  | SIPA1L3  | signal-induced proliferation-associated 1 like 3                                                        |
| 1,028826708 | 0,861   | 1,218410264 | 0,02079 | SIRPA    | signal-regulatory protein alpha                                                                         |
| 1,067325338 | 0,38665 | 1,156688184 | 0,00172 | SIRPB1   | signal-regulatory protein beta 1                                                                        |
| 1,077733145 | 0,38019 | 1,155886707 | 0,01076 | SIRPG    | signal-regulatory protein gamma                                                                         |
| 0,915099168 | 0,74615 | 0,785672517 | 0,00622 | SIRT1    | sirtuin 1                                                                                               |
| 1,040300267 | 0,76329 | 1,156688184 | 0,021   | SIRT3    | sirtuin 3                                                                                               |
| 1,190856849 | 0,07376 | 1,238848698 | 0,00078 | SIRT3    | sirtuin 3                                                                                               |
| 0,966606097 | 0,73559 | 1,148698355 | 0,01564 | SIRT6    | sirtuin 6                                                                                               |
| 0,753667455 | 0,15846 | 0,914465089 | 0,02679 | SIRT7    | sirtuin 7                                                                                               |
| 0,865136691 | 0,26443 | 0,85027416  | 0,02207 | SKA2     | spindle and kinetochore associated complex subunit 2                                                    |
| 1,157490217 | 0,15302 | 1,190031696 | 0,00937 | SKAP2    | src kinase associated phosphoprotein 2                                                                  |
| 1,092020546 | 0,62798 | 1,362258035 | 0,01468 | SKAP2    | src kinase associated phosphoprotein 2                                                                  |
| 0,917639882 | 0,28014 | 0,829319546 | 0,01681 | SKIL     | SKI-like oncogene                                                                                       |
| 1,163120042 | 0,12708 | 1,184271612 | 0,00771 | SKIL     | SKI-like oncogene                                                                                       |
| 1,089752112 | 0,41408 | 1,190031696 | 0,00382 | SKIV2L   | superkiller viralicidal activity 2-like (S. cerevisiae)                                                 |
| 0,79940583  | 0,19078 | 0,799960128 | 0,00239 | SKP1     | S-phase kinase-associated protein 1                                                                     |
| 0,835666959 | 0,3033  | 0,78132788  | 0,00036 | SKP1     | S-phase kinase-associated protein 1                                                                     |
| 1,38991822  | 0,05995 | 1,498999602 | 0,00021 | SLA      | Src-like-adaptor                                                                                        |
| 1,244011653 | 0,11404 | 1,159899655 | 0,03915 | SLA2     | Src-like-adaptor 2                                                                                      |
| 0,866336856 | 0,38487 | 0,8362464   | 0,03629 | SLAIN2   | SLAIN motif family, member 2                                                                            |
| 0,668037039 | 0,10201 | 0,687294348 | 0,00041 | SLAIN2   | SLAIN motif family, member 2                                                                            |
| 0,680657058 | 0,30713 | 0,726482525 | 0,0421  | SLAIN2   | SLAIN motif family, member 2                                                                            |
| 1,009051634 | 0,92236 | 1,141554707 | 0,00173 | SLAMF9   | SLAM family member 9                                                                                    |
| 1,082224645 | 0,53348 | 1,209994089 | 0,01284 | SLC10A1  | solute carrier family 10 (sodium/bile acid cotransporter family), member 1                              |
| 1,064370182 | 0,44169 | 1,244011653 | 0,00817 | SLC11A1  | solute carrier family 11 (proton-coupled divalent metal ion transporters), member 1                     |
| 0,772175133 | 0,21199 | 0,774855931 | 0,00442 | SLC11A2  | solute carrier family 11 (proton-coupled divalent metal ion transporters), member 2                     |
| 0,940826108 | 0,67705 | 0,87175824  | 0,00387 | SLC11A2  | solute carrier family 11 (proton-coupled divalent metal ion transporters), member 2                     |
| 0,753145233 | 0,25086 | 0,835666959 | 0,02    | SLC12A2  | solute carrier family 12 (sodium/potassium/chloride transporters), member 2                             |
| 1,032398535 | 0,73432 | 1,169587664 | 0,00312 | SLC12A3  | solute carrier family 12 (sodium/chloride transporters), member 3                                       |
| 1,101905116 | 0,44877 | 1,17609125  | 0,00426 | SLC12A4  | solute carrier family 12 (potassium/chloride transporters), member 4                                    |
| 1,25353302  | 0,08214 | 1,257013375 | 0,00065 | SLC12A5  | solute carrier family 12 (potassium/chloride transporter), member 5                                     |
| 1,202469249 | 0,05651 | 1,147107024 | 0,00685 | SLC13A2  | solute carrier family 13 (sodium-dependent dicarboxylate transporter), member 2                         |
| 1,264003098 | 0,40146 | 1,731473131 | 0,00041 | SLC13A5  | solute carrier family 13 (sodium-dependent citrate transporter), member 5                               |
| 1,070288698 | 0,32644 | 1,156688184 | 0,01272 | SLC14A2  | solute carrier family 14 (urea transporter), member 2                                                   |
| 1,38991822  | 0,11806 | 1,349102534 | 0,00003 | SLC15A3  | solute carrier family 15, member 3                                                                      |
| 1,147107024 | 0,34144 | 1,200803427 | 0,00392 | SLC16A2  | solute carrier family 16, member 2 (monocarboxylic acid transporter 8)                                  |
| 0,660211421 | 0,12021 | 0,500346694 | 0       | SLC16A7  | solute carrier family 16, member 7 (monocarboxylic acid transporter 2)                                  |
| 0,645281245 | 0,08644 | 0,575943821 | 0,00039 | SLC16A7  | solute carrier family 16, member 7 (monocarboxylic acid transporter 2)                                  |
| 0,798298386 | 0,22774 | 0,697371833 | 0,00021 | SLC16A7  | solute carrier family 16, member 7 (monocarboxylic acid transporter 2)                                  |
| 1,118061851 | 0,28669 | 1,192508872 | 0,00411 | SLC17A1  | solute carrier family 17 (sodium phosphate), member 1                                                   |
| 1,231998073 | 0,18111 | 1,251796459 | 0,00087 | SLC17A5  | solute carrier family 17 (anion/sugar transporter), member 5                                            |
| 1,037419937 | 0,68254 | 1,127400412 | 0,00382 | SLC19A1  | solute carrier family 19 (folate transporter), member 1                                                 |
| 1,215036792 | 0,1246  | 1,380317353 | 0,00091 | SLC1A1   | solute carrier family 1 (neuronal/epithelial high affinity glutamate transporter, system Xag), member 1 |
| 1,050444544 | 0,55608 | 1,097331938 | 0,02457 | SLC1A2   | solute carrier family 1 (glial high affinity glutamate transporter), member 2                           |
| 1,237132479 | 0,2179  | 1,274560627 | 0,00196 | SLC1A3   | solute carrier family 1 (glial high affinity glutamate transporter), member 3                           |
| 1,145517898 | 0,47214 | 1,145517898 | 0,03789 | SLC1A4   | solute carrier family 1 (glutamate/neutral amino acid transporter), member 4                            |
| 1,537940831 | 0,05068 | 1,401527449 | 0,00009 | SLC1A5   | solute carrier family 1 (neutral amino acid transporter), member 5                                      |
| 1,20163605  | 0,08953 | 1,331451613 | 0,00075 | SLC1A7   | solute carrier family 1 (glutamate transporter), member 7                                               |
| 1,074749173 | 0,4286  | 1,111108729 | 0,04755 | SLC1A7   | solute carrier family 1 (glutamate transporter), member 7                                               |
| 1,017479692 | 0,85502 | 1,30224419  | 0,00007 | SLC22A12 | solute carrier family 22 (organic anion/urate transporter), member 12                                   |
| 1,304050735 | 0,05016 | 1,313121125 | 0,01204 | SLC22A14 | solute carrier family 22, member 14                                                                     |
| 0,802737389 | 0,31247 | 0,79774524  | 0,04188 | SLC22A15 | solute carrier family 22, member 15                                                                     |
| 1,099616149 | 0,50696 | 1,194991205 | 0,02903 | SLC22A23 | solute carrier family 22, member 23                                                                     |
| 1,076986376 | 0,51401 | 1,16634937  | 0,02095 | SLC22A25 | solute carrier family 22, member 25                                                                     |
| 0,857376037 | 0,25123 | 0,70222438  | 0,00006 | SLC22A3  | solute carrier family 22 (extraneuronal monoamine transporter), member 3                                |
| 1,144724161 | 0,10259 | 1,123499903 | 0,01146 | SLC23A2  | solute carrier family 23 (nucleobase transporters), member 2                                            |
| 0,996540263 | 0,96211 | 0,887611337 | 0,02513 | SLC23A3  | solute carrier family 23 (nucleobase transporters), member 3                                            |

|             |         |             |         |           |                                                                                                             |
|-------------|---------|-------------|---------|-----------|-------------------------------------------------------------------------------------------------------------|
| 1,199139914 | 0,1958  | 1,098092814 | 0,03121 | SLC24A2   | solute carrier family 24 (sodium/potassium/calcium exchanger), member 2                                     |
| 0,849096246 | 0,29786 | 0,777546036 | 0,00271 | SLC24A3   | solute carrier family 24 (sodium/potassium/calcium exchanger), member 3                                     |
| 0,888842681 | 0,51251 | 0,765248385 | 0,00256 | SLC24A3   | solute carrier family 24 (sodium/potassium/calcium exchanger), member 3                                     |
| 0,974679631 | 0,7614  | 0,835666959 | 0,00546 | SLC25A10  | solute carrier family 25 (mitochondrial carrier; dicarboxylate transporter), member 10                      |
| 1,185914499 | 0,05947 | 1,203303026 | 0,01858 | SLC25A11  | solute carrier family 25 (mitochondrial carrier; oxoglutarate carrier), member 11                           |
| 0,882702996 | 0,42387 | 0,822450069 | 0,00218 | SLC25A12  | solute carrier family 25 (mitochondrial carrier, Aralar), member 12                                         |
| 0,721964598 | 0,1947  | 0,750539549 | 0,00006 | SLC25A13  | solute carrier family 25, member 13 (citrin)                                                                |
| 0,765778999 | 0,2434  | 0,822450069 | 0,00874 | SLC25A13  | solute carrier family 25, member 13 (citrin)                                                                |
| 0,901250463 | 0,41933 | 0,871154192 | 0,00322 | SLC25A14  | solute carrier family 25 (mitochondrial carrier, brain), member 14                                          |
| 0,942131274 | 0,74909 | 0,809442217 | 0,02034 | SLC25A16  | solute carrier family 25 (mitochondrial carrier; Graves disease autoantigen), member 16                     |
| 1,041743429 | 0,73832 | 0,860352631 | 0,02126 | SLC25A17  | solute carrier family 25 (mitochondrial carrier; peroxisomal membrane protein, 34kDa), member 17            |
| 1,006257823 | 0,95883 | 1,210833084 | 0,01133 | SLC25A18  | solute carrier family 25 (mitochondrial carrier), member 18                                                 |
| 1,056285625 | 0,54013 | 0,885153765 | 0,02027 | SLC25A21  | solute carrier family 25 (mitochondrial oxodicarboxylate carrier), member 21                                |
| 0,918912883 | 0,68127 | 0,823591017 | 0,02342 | SLC25A24  | solute carrier family 25 (mitochondrial carrier; phosphate carrier), member 24                              |
| 1,04608494  | 0,74841 | 1,258757174 | 0,00776 | SLC25A29  | solute carrier family 25, member 29                                                                         |
| 1,148698355 | 0,0768  | 1,189207115 | 0,01058 | SLC25A29  | solute carrier family 25, member 29                                                                         |
| 0,953959551 | 0,58877 | 0,743291492 | 0,00022 | SLC25A33  | solute carrier family 25, member 33                                                                         |
| 0,865136691 | 0,61828 | 0,765778999 | 0,00956 | SLC25A36  | solute carrier family 25, member 36                                                                         |
| 1,077331345 | 0,77586 | 0,767905135 | 0,03832 | SLC25A36  | solute carrier family 25, member 36                                                                         |
| 0,934327347 | 0,88564 | 0,798298386 | 0,04608 | SLC25A37  | solute carrier family 25, member 37                                                                         |
| 0,972654947 | 0,73409 | 0,882091365 | 0,00439 | SLC25A4   | solute carrier family 25 (mitochondrial carrier; adenine nucleotide translocator), member 4                 |
| 1,155085785 | 0,15582 | 1,151887642 | 0,01779 | SLC25A42  | solute carrier family 25, member 42                                                                         |
| 1,004167543 | 0,96455 | 1,147902414 | 0,00353 | SLC25A42  | solute carrier family 25, member 42                                                                         |
| 0,816203046 | 0,11959 | 0,827596816 | 0,00477 | SLC25A44  | solute carrier family 25, member 44                                                                         |
| 1,33885257  | 0,05846 | 1,108032348 | 0,02214 | SLC25A45  | solute carrier family 25, member 45                                                                         |
| 0,986232704 | 0,92286 | 0,814507563 | 0,01466 | SLC25A46  | solute carrier family 25, member 46                                                                         |
| 1,084477409 | 0,2555  | 1,21167286  | 0,00872 | SLC26A8   | solute carrier family 26, member 8                                                                          |
| 1,046810282 | 0,70534 | 1,242288282 | 0,00517 | SLC27A1   | solute carrier family 27 (fatty acid transporter), member 1                                                 |
| 0,697855382 | 0,31124 | 0,717474767 | 0,01172 | SLC28A3   | solute carrier family 28 (sodium-coupled nucleoside transporter), member 3                                  |
| 1,350037985 | 0,13072 | 1,264879542 | 0,00493 | SLC29A1   | solute carrier family 29 (nucleoside transporters), member 1                                                |
| 1,147902414 | 0,1853  | 1,122721422 | 0,03546 | SLC29A1   | solute carrier family 29 (nucleoside transporters), member 1                                                |
| 1,033114388 | 0,6408  | 1,180174343 | 0,01202 | SLC29A2   | solute carrier family 29 (nucleoside transporters), member 2                                                |
| 1,217566019 | 0,0911  | 1,153485605 | 0,00854 | SLC29A3   | solute carrier family 29 (nucleoside transporters), member 3                                                |
| 1,193335743 | 0,09625 | 1,202469249 | 0,00015 | SLC29A4   | solute carrier family 29 (nucleoside transporters), member 4                                                |
| 0,807760778 | 0,1134  | 0,768970416 | 0,00004 | SLC2A1    | solute carrier family 2 (facilitated glucose transporter), member 1                                         |
| 1,263127262 | 0,10303 | 1,274560627 | 0,00592 | SLC2A11   | solute carrier family 2 (facilitated glucose transporter), member 11                                        |
| 1,203303026 | 0,0834  | 1,167967395 | 0,00081 | SLC2A11   | solute carrier family 2 (facilitated glucose transporter), member 11                                        |
| 0,888226796 | 0,59185 | 0,643048742 | 0,00169 | SLC2A13   | solute carrier family 2 (facilitated glucose transporter), member 13                                        |
| 1           | 0,99977 | 0,825305409 | 0,04884 | SLC2A4ARG | SLC2A4 regulator                                                                                            |
| 1,159095952 | 0,41318 | 1,244874235 | 0,00967 | SLC2A5    | solute carrier family 2 (facilitated glucose/fructose transporter), member 5                                |
| 1,314031627 | 0,05822 | 1,295042999 | 0,00251 | SLC2A9    | solute carrier family 2 (facilitated glucose transporter), member 9                                         |
| 0,85797053  | 0,37149 | 0,807201075 | 0,0047  | SLC30A1   | solute carrier family 30 (zinc transporter), member 1                                                       |
| 1,229438867 | 0,08734 | 1,188383105 | 0,01276 | SLC30A2   | solute carrier family 30 (zinc transporter), member 2                                                       |
| 0,772175133 | 0,14718 | 0,704660378 | 0,00012 | SLC30A4   | solute carrier family 30 (zinc transporter), member 4                                                       |
| 0,902500727 | 0,43086 | 0,820741609 | 0,00385 | SLC30A5   | solute carrier family 30 (zinc transporter), member 5                                                       |
| 0,901875378 | 0,67385 | 0,788400174 | 0,00095 | SLC30A9   | solute carrier family 30 (zinc transporter), member 9                                                       |
| 0,860352631 | 0,16066 | 0,762072415 | 0,00007 | SLC31A1   | solute carrier family 31 (copper transporters), member 1                                                    |
| 1           | 0,99958 | 1,181811547 | 0,02    | SLC33A1   | solute carrier family 33 (acetyl-CoA transporter), member 1                                                 |
| 1,094293701 | 0,2681  | 1,258757174 | 0,0028  | SLC34A3   | solute carrier family 34 (sodium phosphate), member 3                                                       |
| 0,78132788  | 0,15481 | 0,869947353 | 0,01137 | SLC35A1   | solute carrier family 35 (CMP-sialic acid transporter), member A1                                           |
| 0,924663278 | 0,60984 | 0,804966138 | 0,04284 | SLC35A3   | solute carrier family 35 (UDP-N-acetylglucosamine (UDP-GlcNAc) transporter), member A3                      |
| 0,557483109 | 0,10473 | 0,76154437  | 0,00275 | SLC35A3   | solute carrier family 35 (UDP-N-acetylglucosamine (UDP-GlcNAc) transporter), member A3                      |
| 0,828744904 | 0,39971 | 0,70759708  | 0,00099 | SLC35A3   | solute carrier family 35 (UDP-N-acetylglucosamine (UDP-GlcNAc) transporter), member A3                      |
| 0,976708529 | 0,8703  | 1,131314463 | 0,02737 | SLC35C2   | solute carrier family 35, member C2                                                                         |
| 1,048262476 | 0,85976 | 0,832757751 | 0,02472 | SLC35D1   | solute carrier family 35 (UDP-glucuronic acid/UDP-N-acetylgalactosamine dual transporter), member D1        |
| 0,795536484 | 0,28871 | 0,801625329 | 0,00291 | SLC35E1   | solute carrier family 35, member E1                                                                         |
| 0,807201075 | 0,09722 | 0,782411782 | 0,00319 | SLC35E1   | solute carrier family 35, member E1                                                                         |
| 1,00765376  | 0,95792 | 0,866937564 | 0,00093 | SLC35E1   | solute carrier family 35, member E1                                                                         |
| 0,90312651  | 0,4177  | 0,859756486 | 0,02355 | SLC35E3   | solute carrier family 35, member E3                                                                         |
| 1,17609125  | 0,15082 | 1,164733586 | 0,00299 | SLC35F1   | solute carrier family 35, member F1                                                                         |
| 1,082975046 | 0,35084 | 1,188383105 | 0,02215 | SLC36A1   | solute carrier family 36 (proton/amino acid symporter), member 1                                            |
| 0,888842681 | 0,35191 | 0,852634892 | 0,0019  | SLC36A1   | solute carrier family 36 (proton/amino acid symporter), member 1                                            |
| 0,816768991 | 0,12009 | 0,854409741 | 0,01354 | SLC37A3   | solute carrier family 37 (glycerol-3-phosphate transporter), member 3                                       |
| 0,844400887 | 0,38038 | 0,790589117 | 0,00686 | SLC38A1   | solute carrier family 38, member 1                                                                          |
| 0,813943185 | 0,10672 | 0,87175824  | 0,02303 | SLC38A1   | solute carrier family 38, member 1                                                                          |
| 1,40444876  | 0,0933  | 1,565908593 | 0,00003 | SLC38A10  | solute carrier family 38, member 10                                                                         |
| 0,792234811 | 0,17824 | 0,86154616  | 0,01439 | SLC38A2   | solute carrier family 38, member 2                                                                          |
| 1,181811547 | 0,35849 | 1,620006947 | 0       | SLC38A5   | solute carrier family 38, member 5                                                                          |
| 1,057018041 | 0,74706 | 1,216722359 | 0,00911 | SLC38A7   | solute carrier family 38, member 7                                                                          |
| 1,226884977 | 0,08988 | 1,190856849 | 0,03928 | SLC39A13  | solute carrier family 39 (zinc transporter), member 13                                                      |
| 1,145517898 | 0,43722 | 1,395710764 | 0,04369 | SLC39A14  | solute carrier family 39 (zinc transporter), member 14                                                      |
| 1,147107024 | 0,1824  | 1,205807828 | 0,00335 | SLC39A3   | solute carrier family 39 (zinc transporter), member 3                                                       |
| 1,065846736 | 0,52934 | 1,179356592 | 0,00892 | SLC39A5   | solute carrier family 39 (metal ion transporter), member 5                                                  |
| 0,97874165  | 0,76039 | 1,116512962 | 0,02376 | SLC41A3   | solute carrier family 41, member 3                                                                          |
| 1,062895674 | 0,70855 | 1,286989247 | 0,00469 | SLC43A3   | solute carrier family 43, member 3                                                                          |
| 0,843815796 | 0,44582 | 0,855595026 | 0,03944 | SLC44A1   | solute carrier family 44, member 1                                                                          |
| 1,0132569   | 0,92046 | 0,76154437  | 0,02939 | SLC44A3   | solute carrier family 44, member 3                                                                          |
| 0,547146851 | 0,08947 | 0,61301743  | 0,00789 | SLC44A5   | solute carrier family 44, member 5                                                                          |
| 1,021720083 | 0,80373 | 0,908854218 | 0,03488 | SLC45A2   | solute carrier family 45, member 2                                                                          |
| 1,121943481 | 0,117   | 1,121943481 | 0,04551 | SLC45A3   | solute carrier family 45, member 3                                                                          |
| 1,118837101 | 0,18032 | 1,144724161 | 0,00904 | SLC46A1   | solute carrier family 46 (folate transporter), member 1                                                     |
| 1,040300267 | 0,63498 | 1,154285418 | 0,00593 | SLC46A1   | solute carrier family 46 (folate transporter), member 1                                                     |
| 1,192508872 | 0,08382 | 1,231998073 | 0,00014 | SLC46A1   | solute carrier family 46 (folate transporter), member 1                                                     |
| 1,298638603 | 0,08171 | 1,275444392 | 0,01429 | SLC46A3   | solute carrier family 46, member 3                                                                          |
| 1,137605228 | 0,13875 | 1,210833084 | 0,00007 | SLC4A1    | solute carrier family 4, anion exchanger, member 1 (erythrocyte membrane protein band 3, Diego blood group) |
| 0,841479482 | 0,30912 | 0,886381699 | 0,01936 | SLC4A1AP  | solute carrier family 4 (anion exchanger), member 1, adaptor protein                                        |
| 0,837987135 | 0,05727 | 1,25353302  | 0,00658 | SLC4A3    | solute carrier family 4, anion exchanger, member 3                                                          |
| 1,098092814 | 0,31918 | 1,169587664 | 0,03595 | SLC4A5    | solute carrier family 4, sodium bicarbonate cotransporter, member 5                                         |
| 1,230291345 | 0,08638 | 1,229438867 | 0,00013 | SLC4A8    | solute carrier family 4, sodium bicarbonate cotransporter, member 8                                         |
| 1,066585781 | 0,38624 | 1,16634937  | 0,03921 | SLC5A7    | solute carrier family 5 (choline transporter), member 7                                                     |
| 0,917639882 | 0,60078 | 0,800514811 | 0,01897 | SLC6A15   | solute carrier family 6 (neutral amino acid transporter), member 15                                         |
| 1,097331938 | 0,34311 | 1,225185332 | 0,00974 | SLC6A16   | solute carrier family 6, member 16                                                                          |
| 1,164733586 | 0,11924 | 1,132098902 | 0,02427 | SLC6A19   | solute carrier family 6 (neutral amino acid transporter), member 19                                         |
| 1,101905116 | 0,46072 | 1,22630486  | 0,00165 | SLC6A19   | solute carrier family 6 (neutral amino acid transporter), member 19                                         |
| 0,948684315 | 0,46693 | 1,107264584 | 0,04249 | SLC6A2    | solute carrier family 6 (neurotransmitter transporter, noradrenalin), member 2                              |
| 1,07549439  | 0,4074  | 1,122721422 | 0,02926 | SLC6A20   | solute carrier family 6 (proline IMINO transporter), member 20                                              |
| 1,153485605 | 0,12574 | 1,120389214 | 0,03089 | SLC6A3    | solute carrier family 6 (neurotransmitter transporter, dopamine), member 3                                  |
| 1,011853201 | 0,95423 | 0,786762445 | 0,00198 | SLC6A4    | solute carrier family 6 (neurotransmitter transporter, serotonin), member 4                                 |
| 0,734075318 | 0,13475 | 0,635956503 | 0,00067 | SLC6A4    | solute carrier family 6 (neurotransmitter transporter, serotonin), member 4                                 |
| 1,339783602 | 0,06204 | 1,331451613 | 0,01317 | SLC6A6    | solute carrier family 6 (neurotransmitter transporter, taurine), member 6                                   |
| 1,644900137 | 0,05092 | 1,464085696 | 0,01066 | SLC7A11   | solute carrier family 7 (anionic amino acid transporter light chain, xc- system), member 11                 |
| 1,207480591 | 0,0744  | 1,118837101 | 0,03611 | SLC7A14   | solute carrier family 7 (orphan transporter), member 14                                                     |
| 1,018891197 | 0,81798 | 1,155085785 | 0,00244 | SLC7A2    | solute carrier family 7 (cationic amino acid transporter, y+ system), member 2                              |
| 1,062895674 | 0,5546  | 1,124278924 | 0,02038 | SLC7A4    | solute carrier family 7 (orphan transporter), member 4                                                      |

|             |         |             |         |          |                                                                                                             |
|-------------|---------|-------------|---------|----------|-------------------------------------------------------------------------------------------------------------|
| 0,985549337 | 0,92585 | 1,182631    | 0,04456 | SLC7A6   | solute carrier family 7 (amino acid transporter light chain, y+L system), member 6                          |
| 0,741747467 | 0,07516 | 0,767905135 | 0,01897 | SLC7A8   | solute carrier family 7 (amino acid transporter light chain, L system), member 8                            |
| 1,22603486  | 0,13964 | 1,144724161 | 0,00179 | SLC7A9   | solute carrier family 7 (glycoprotein-associated amino acid transporter light chain, bo,+ system), member 9 |
| 1,16634937  | 0,11714 | 1,270480591 | 0,00698 | SLC8A1   | solute carrier family 8 (sodium/calcium exchanger), member 1                                                |
| 1,069547088 | 0,60729 | 1,173648177 | 0,01793 | SLC9A3   | solute carrier family 9 (sodium/hydrogen exchanger), member 3                                               |
| 0,844986384 | 0,41455 | 0,760489378 | 0,00253 | SLC9A6   | solute carrier family 9 (sodium/hydrogen exchanger), member 6                                               |
| 1,146312186 | 0,21004 | 1,083725967 | 0,04024 | SLC9A7   | solute carrier family 9 (sodium/hydrogen exchanger), member 7                                               |
| 1,343503426 | 0,08764 | 1,178539408 | 0,00319 | SLCO1C1  | solute carrier organic anion transporter family, member 1C1                                                 |
| 1,338855257 | 0,07262 | 1,528376521 | 0,00001 | SLCO2B1  | solute carrier organic anion transporter family, member 2B1                                                 |
| 1,245737416 | 0,15973 | 1,536875181 | 0,00017 | SLCO2B1  | solute carrier organic anion transporter family, member 2B1                                                 |
| 0,866937564 | 0,21235 | 0,777007269 | 0,00031 | SLCO3A1  | solute carrier organic anion transporter family, member 3A1                                                 |
| 0,927873476 | 0,66461 | 0,827596816 | 0,0282  | SLCO4A1  | solute carrier organic anion transporter family, member 4A1                                                 |
| 1,04608494  | 0,62842 | 1,122721422 | 0,04522 | SLCO6A1  | solute carrier organic anion transporter family, member 6A1                                                 |
| 1,163120042 | 0,34468 | 1,298638603 | 0,00097 | SLFN13   | schlafen family member 13                                                                                   |
| 0,733566672 | 0,17441 | 0,802181166 | 0,00117 | SLFN5    | schlafen family member 5                                                                                    |
| 0,934975198 | 0,59277 | 0,750019495 | 0,00024 | SLIT2    | slit homolog 2 (Drosophila)                                                                                 |
| 1,168777249 | 0,46506 | 1,25092908  | 0,02294 | SLIT3    | slit homolog 3 (Drosophila)                                                                                 |
| 0,863339559 | 0,37849 | 0,647970483 | 0,00167 | SLITRK6  | SLIT and NTRK-like family, member 6                                                                         |
| 0,875998315 | 0,64411 | 0,670356296 | 0,00648 | SLITRK6  | SLIT and NTRK-like family, member 6                                                                         |
| 0,906890329 | 0,1384  | 0,86934456  | 0,00187 | SLMAP    | sarcolemma associated protein                                                                               |
| 0,774855931 | 0,26464 | 0,720964436 | 0,00155 | SLMAP    | sarcolemma associated protein                                                                               |
| 0,652477474 | 0,12301 | 0,615145672 | 0,00598 | SLMO2    | slowmo homolog 2 (Drosophila)                                                                               |
| 0,712518807 | 0,15732 | 0,792784137 | 0,00118 | SLTM     | SAFB-like, transcription modulator                                                                          |
| 0,918912883 | 0,66278 | 0,786217292 | 0,00484 | SLU7     | SLU7 splicing factor homolog (S. cerevisiae)                                                                |
| 0,750539549 | 0,05267 | 0,798851916 | 0,00145 | SLU7     | SLU7 splicing factor homolog (S. cerevisiae)                                                                |
| 1,230291345 | 0,11551 | 1,240567298 | 0,00196 | SLX4     | SLX4 structure-specific endonuclease subunit homolog (S. cerevisiae)                                        |
| 0,7944344   | 0,31186 | 0,728499557 | 0,00005 | SMAD2    | SMAD family member 2                                                                                        |
| 0,725476104 | 0,19346 | 0,747942879 | 0,00084 | SMAD2    | SMAD family member 2                                                                                        |
| 0,910038824 | 0,62638 | 0,853817714 | 0,03344 | SMAD2    | SMAD family member 2                                                                                        |
| 1,014662547 | 0,95974 | 0,631563631 | 0,00028 | SMAD5    | SMAD family member 5                                                                                        |
| 0,916368645 | 0,77196 | 0,788400174 | 0,00112 | SMAD5    | SMAD family member 5                                                                                        |
| 0,750539549 | 0,19609 | 0,784040454 | 0,00108 | SMAD5    | SMAD family member 5                                                                                        |
| 1,21167266  | 0,13578 | 1,115739322 | 0,03137 | SMAD6    | SMAD family member 6                                                                                        |
| 0,772175133 | 0,10676 | 0,751059963 | 0,00105 | SMAP1    | small ArfGAP 1                                                                                              |
| 0,906261938 | 0,57749 | 0,842062954 | 0,0272  | SMARCA2  | SWI/SNF related, matrix associated, actin dependent regulator of chromatin, subfamily a, member 2           |
| 0,835087919 | 0,25639 | 0,74277646  | 0,00104 | SMARCA2  | SWI/SNF related, matrix associated, actin dependent regulator of chromatin, subfamily a, member 2           |
| 0,738669032 | 0,07529 | 0,804966138 | 0,00819 | SMARCA4  | SWI/SNF related, matrix associated, actin dependent regulator of chromatin, subfamily a, member 4           |
| 0,76154437  | 0,08955 | 0,78132788  | 0,01074 | SMARCA4  | SWI/SNF related, matrix associated, actin dependent regulator of chromatin, subfamily a, member 4           |
| 0,784584098 | 0,15512 | 0,86154616  | 0,00942 | SMARCC1  | SWI/SNF related, matrix associated, actin dependent regulator of chromatin, subfamily c, member 1           |
| 0,632001549 | 0,09872 | 0,805524291 | 0,0468  | SMARCC1  | SWI/SNF related, matrix associated, actin dependent regulator of chromatin, subfamily c, member 1           |
| 0,78024548  | 0,11131 | 0,669891801 | 0,00033 | SMARCC2  | SWI/SNF related, matrix associated, actin dependent regulator of chromatin, subfamily c, member 2           |
| 0,78132788  | 0,05817 | 0,805524291 | 0,00034 | SMARCE1  | SWI/SNF related, matrix associated, actin dependent regulator of chromatin, subfamily e, member 1           |
| 1,016774673 | 0,92511 | 0,888226796 | 0,04188 | SMARCE1  | SWI/SNF related, matrix associated, actin dependent regulator of chromatin, subfamily e, member 1           |
| 0,920187651 | 0,6934  | 0,73153561  | 0,0007  | SMARCE1  | SWI/SNF related, matrix associated, actin dependent regulator of chromatin, subfamily e, member 1           |
| 0,961927455 | 0,81451 | 0,853226098 | 0,0085  | SMC1A    | structural maintenance of chromosomes 1A                                                                    |
| 0,697371833 | 0,0822  | 0,750539549 | 0,02142 | SMC2     | structural maintenance of chromosomes 2                                                                     |
| 0,890075733 | 0,44508 | 0,760489377 | 0,0002  | SMC2     | structural maintenance of chromosomes 2                                                                     |
| 0,863339559 | 0,12805 | 0,901250463 | 0,03742 | SMC3     | structural maintenance of chromosomes 3                                                                     |
| 0,456282744 | 0,06063 | 0,549046407 | 0,00096 | SMC3     | structural maintenance of chromosomes 3                                                                     |
| 0,757858283 | 0,30315 | 0,686818117 | 0,00119 | SMC3     | structural maintenance of chromosomes 3                                                                     |
| 0,696888619 | 0,08888 | 0,69495911  | 0,00005 | SMC5     | structural maintenance of chromosomes 5                                                                     |
| 0,833931044 | 0,37932 | 0,747424624 | 0,00174 | SMC5     | structural maintenance of chromosomes 5                                                                     |
| 0,890692901 | 0,15123 | 0,895025071 | 0,01928 | SMC5     | structural maintenance of chromosomes 5                                                                     |
| 1,015366101 | 0,93522 | 0,878430468 | 0,04192 | SMC6     | structural maintenance of chromosomes 6                                                                     |
| 0,721464343 | 0,32243 | 0,639936207 | 0,00061 | SMCHD1   | structural maintenance of chromosomes flexible hinge domain containing 1                                    |
| 0,859160755 | 0,27152 | 0,856781955 | 0,0434  | SMCHD1   | structural maintenance of chromosomes flexible hinge domain containing 1                                    |
| 0,933032992 | 0,30895 | 0,816768991 | 0,00029 | SMCR7L   | Smith-Magenis syndrome chromosome region, candidate 7-like                                                  |
| 1           | 0,99978 | 1,174461971 | 0,00594 | SMCR8    | Smith-Magenis syndrome chromosome region, candidate 8                                                       |
| 0,949342121 | 0,66065 | 0,877213549 | 0,01992 | SMCR8    | Smith-Magenis syndrome chromosome region, candidate 8                                                       |
| 0,637722196 | 0,14463 | 0,706616822 | 0,04809 | SMEK1    | SMEK homolog 1, suppressor of mek1 (Dictyostelium)                                                          |
| 0,978063473 | 0,91428 | 0,746389192 | 0,00027 | SMEK2    | SMEK homolog 2, suppressor of mek1 (Dictyostelium)                                                          |
| 0,730521289 | 0,09245 | 0,81056512  | 0,00013 | SMEK2    | SMEK homolog 2, suppressor of mek1 (Dictyostelium)                                                          |
| 0,708087719 | 0,08074 | 0,755236293 | 0,00658 | SMEK2    | SMEK homolog 2, suppressor of mek1 (Dictyostelium)                                                          |
| 0,703684188 | 0,12014 | 0,827023368 | 0,00796 | SMG1     | smg-1 homolog, phosphatidylinositol 3-kinase-related kinase (C. elegans)                                    |
| 1,107264584 | 0,4649  | 1,2397077   | 0,01218 | SMG7     | smg-7 homolog, nonsense mediated mRNA decay factor (C. elegans)                                             |
| 1,151887642 | 0,28238 | 1,234562607 | 0,00424 | SMG7     | smg-7 homolog, nonsense mediated mRNA decay factor (C. elegans)                                             |
| 1,227735684 | 0,47778 | 0,798298386 | 0,04055 | SMG7     | smg-7 homolog, nonsense mediated mRNA decay factor (C. elegans)                                             |
| 0,949342121 | 0,72155 | 1,358486285 | 0,0008  | SMG9     | smg-9 homolog, nonsense mediated mRNA decay factor (C. elegans)                                             |
| 1,118837101 | 0,30133 | 1,204972315 | 0,02289 | SMG9     | smg-9 homolog, nonsense mediated mRNA decay factor (C. elegans)                                             |
| 1,121943481 | 0,19275 | 1,117287138 | 0,02542 | SMOC1    | SPARC related modular calcium binding 1                                                                     |
| 1,140763716 | 0,19663 | 1,231144413 | 0,01378 | SMOC1    | SPARC related modular calcium binding 1                                                                     |
| 1,151887642 | 0,10671 | 1,159095952 | 0,0043  | SMOC2    | SPARC related modular calcium binding 2                                                                     |
| 1,074749173 | 0,52164 | 1,133669413 | 0,04905 | SMTN     | smoothelin                                                                                                  |
| 1,185914499 | 0,08945 | 1,225185332 | 0,00012 | SMTNL2   | smoothelin-like 2                                                                                           |
| 0,817902059 | 0,15784 | 0,78132788  | 0,00109 | SMU1     | smu-1 suppressor of mec-8 and unc-52 homolog (C. elegans)                                                   |
| 1,127400412 | 0,16879 | 0,864537231 | 0,02375 | SMU1     | smu-1 suppressor of mec-8 and unc-52 homolog (C. elegans)                                                   |
| 0,792234811 | 0,162   | 0,862143545 | 0,01585 | SMURF1   | SMAD specific E3 ubiquitin protein ligase 1                                                                 |
| 1,100378609 | 0,38816 | 1,188383105 | 0,00283 | SMYD1    | SET and MYND domain containing 1                                                                            |
| 0,733566672 | 0,16444 | 0,673616788 | 0,00001 | SMYD2    | SET and MYND domain containing 2                                                                            |
| 0,854409741 | 0,10186 | 0,863938187 | 0,00284 | SMYD2    | SET and MYND domain containing 2                                                                            |
| 1,087488391 | 0,5763  | 1,191682575 | 0,01358 | SMYD5    | SMYD family member 5                                                                                        |
| 0,916368645 | 0,26153 | 0,879039561 | 0,01433 | SNAP29   | synaptosomal-associated protein, 29kDa                                                                      |
| 1,184271612 | 0,1557  | 1,266634254 | 0,00355 | SNAPC2   | small nuclear RNA activating complex, polypeptide 2, 45kDa                                                  |
| 0,84264683  | 0,11717 | 0,907519155 | 0,02499 | SNAPC3   | small nuclear RNA activating complex, polypeptide 3, 50kDa                                                  |
| 1,048989328 | 0,71435 | 1,104198847 | 0,04878 | SNAPC4   | small nuclear RNA activating complex, polypeptide 4, 190kDa                                                 |
| 1,059218335 | 0,58316 | 1,271031689 | 0,00149 | SNCG     | synuclein, gamma (breast cancer-specific protein 1)                                                         |
| 1,073260286 | 0,57601 | 1,175276328 | 0,00456 | SND1     | staphylococcal nuclease and tudor domain containing 1                                                       |
| 1,052631155 | 0,49556 | 1,113421618 | 0,01865 | SNED1    | sushi, nidogen and EGF-like domains 1                                                                       |
| 0,918276162 | 0,40451 | 0,827596816 | 0,00086 | SNF8     | SNF8, ESCRT-II complex subunit, homolog (S. cerevisiae)                                                     |
| 0,730521289 | 0,13987 | 0,819604608 | 0,00225 | SNHG12   | small nucleolar RNA host gene 12 (non-protein coding)                                                       |
| 0,699792933 | 0,06437 | 0,733566672 | 0,00019 | SNHG12   | small nucleolar RNA host gene 12 (non-protein coding)                                                       |
| 0,859160755 | 0,09488 | 0,880869374 | 0,03616 | SNHG6    | small nucleolar RNA host gene 6 (non-protein coding)                                                        |
| 0,983502074 | 0,90694 | 0,793883931 | 0,00015 | SNN      | stannin                                                                                                     |
| 0,814507563 | 0,28698 | 0,660211421 | 0,00032 | SNORA21  | small nucleolar RNA, H/ACA box 21                                                                           |
| 1,088997015 | 0,29079 | 1,161508732 | 0,01289 | SNORA71A | small nucleolar RNA, H/ACA box 71A                                                                          |
| 1,003471749 | 0,98123 | 0,8362464   | 0,01798 | SNRK     | SNF related kinase                                                                                          |
| 0,873572896 | 0,36349 | 0,863339559 | 0,00321 | SNRNP35  | small nuclear ribonucleoprotein 35kDa (U11/U12)                                                             |
| 0,738157203 | 0,06869 | 0,772175133 | 0,00001 | SNRPA1   | small nuclear ribonucleoprotein polypeptide A'                                                              |
| 0,687294348 | 0,05427 | 0,862143545 | 0,00575 | SNRPA1   | small nuclear ribonucleoprotein polypeptide A'                                                              |
| 1,064370182 | 0,7364  | 0,819036698 | 0,04329 | SNRPA1   | small nuclear ribonucleoprotein polypeptide A'                                                              |
| 0,888226796 | 0,11266 | 0,870550563 | 0,00554 | SNRPB2   | small nuclear ribonucleoprotein polypeptide B                                                               |
| 0,828170661 | 0,15906 | 0,854409741 | 0,02637 | SNRPD1   | small nuclear ribonucleoprotein D1 polypeptide 16kDa                                                        |
| 0,833353207 | 0,38935 | 0,679243147 | 0,01708 | SNRPE    | small nuclear ribonucleoprotein polypeptide E                                                               |
| 1,082975046 | 0,34839 | 1,128182137 | 0,03135 | SNRPE    | small nuclear ribonucleoprotein polypeptide E                                                               |

|             |         |             |         |           |                                                                                 |
|-------------|---------|-------------|---------|-----------|---------------------------------------------------------------------------------|
| 0,985549337 | 0,86163 | 0,855002178 | 0,01314 | SNRPG     | small nuclear ribonucleoprotein polypeptide G                                   |
| 0,933679945 | 0,70006 | 0,774319028 | 0,0367  | SNRPN     | small nuclear ribonucleoprotein polypeptide N                                   |
| 1,286097483 | 0,11055 | 1,359428242 | 0,0041  | SNRPN     | small nuclear ribonucleoprotein polypeptide N                                   |
| 1,684125907 | 0,15738 | 1,370782805 | 0,02022 | SNRPN     | small nuclear ribonucleoprotein polypeptide N                                   |
| 0,803850991 | 0,3579  | 0,837406888 | 0,04102 | SNTB2     | syntrophin, beta 2 (dystrophin-associated protein A1, 59kDa, basic component 2) |
| 1,068065408 | 0,3448  | 1,132098902 | 0,03621 | SNTB2     | syntrophin, beta 2 (dystrophin-associated protein A1, 59kDa, basic component 2) |
| 0,853226098 | 0,41699 | 0,904379378 | 0,04306 | SNW1      | SNW domain containing 1                                                         |
| 1,242288282 | 0,07467 | 1,28788163  | 0,001   | SNW1      | SNW domain containing 1                                                         |
| 1,041743429 | 0,6787  | 1,095052471 | 0,03707 | SNX12     | sorting nexin 12                                                                |
| 0,868742185 | 0,50754 | 0,782411782 | 0,00599 | SNX13     | sorting nexin 13                                                                |
| 0,905006463 | 0,4945  | 0,828170661 | 0,01397 | SNX14     | sorting nexin 14                                                                |
| 0,972654947 | 0,77648 | 0,734075318 | 0,01999 | SNX14     | sorting nexin 14                                                                |
| 0,846745312 | 0,53343 | 0,685391402 | 0,00323 | SNX16     | sorting nexin 16                                                                |
| 0,832198735 | 0,49647 | 0,679243142 | 0,00261 | SNX16     | sorting nexin 16                                                                |
| 0,558643569 | 0,08185 | 0,755236293 | 0,03718 | SNX2      | sorting nexin 2                                                                 |
| 0,826450318 | 0,20789 | 0,872362706 | 0,01001 | SNX2      | sorting nexin 2                                                                 |
| 0,923382311 | 0,41385 | 1,104198847 | 0,02625 | SNX20     | sorting nexin 20                                                                |
| 0,695440986 | 0,072   | 0,739693755 | 0,00083 | SNX24     | sorting nexin 24                                                                |
| 0,878430468 | 0,28743 | 0,867538687 | 0,01353 | SNX24     | sorting nexin 24                                                                |
| 0,872362706 | 0,15865 | 0,872362706 | 0,01108 | SNX25     | sorting nexin 25                                                                |
| 1,106497353 | 0,5817  | 0,824162085 | 0,00598 | SNX25     | sorting nexin 25                                                                |
| 0,97874165  | 0,7753  | 0,901250463 | 0,00865 | SNX25     | sorting nexin 25                                                                |
| 0,975355462 | 0,81399 | 1,091263877 | 0,0451  | SNX29     | sorting nexin 29                                                                |
| 1,01395948  | 0,9225  | 0,842062954 | 0,01729 | SNX3      | sorting nexin 3                                                                 |
| 1,011152081 | 0,94781 | 0,779704843 | 0,00133 | SNX3      | sorting nexin 3                                                                 |
| 0,747942879 | 0,20822 | 0,812815602 | 0,01888 | SNX30     | sorting nexin family member 30                                                  |
| 1,16634937  | 0,08923 | 1,25092908  | 0,0021  | SNX32     | sorting nexin 32                                                                |
| 0,848507902 | 0,33403 | 0,791137301 | 0,01418 | SNX4      | sorting nexin 4                                                                 |
| 0,743291492 | 0,11867 | 0,832775771 | 0,00545 | SNX9      | sorting nexin 9                                                                 |
| 0,749499801 | 0,14276 | 0,731028724 | 0,00083 | SNX9      | sorting nexin 9                                                                 |
| 1,125058485 | 0,12856 | 1,23370717  | 0,01605 | SOBP      | sine oculis binding protein homolog (Drosophila)                                |
| 1,493813457 | 0,07458 | 1,495885758 | 0,00119 | SOCS3     | suppressor of cytokine signaling 3                                              |
| 1,161508732 | 0,3044  | 1,25092908  | 0,02069 | SOCS3     | suppressor of cytokine signaling 3                                              |
| 0,918912883 | 0,65572 | 0,79940583  | 0,00391 | SOCS4     | suppressor of cytokine signaling 4                                              |
| 0,906890329 | 0,65891 | 0,7944344   | 0,00472 | SOCS5     | suppressor of cytokine signaling 5                                              |
| 0,785128119 | 0,18452 | 0,768970416 | 0,00615 | SOCS5     | suppressor of cytokine signaling 5                                              |
| 0,789493887 | 0,35428 | 0,756808396 | 0,00023 | SOCS5     | suppressor of cytokine signaling 5                                              |
| 0,859160755 | 0,48539 | 0,844986384 | 0,01105 | SOCS7     | suppressor of cytokine signaling 7                                              |
| 0,790041312 | 0,09629 | 0,805524291 | 0,00069 | SOCS7     | suppressor of cytokine signaling 7                                              |
| 1,07997656  | 0,34614 | 1,171210181 | 0,03096 | SOHLH1    | spermatogenesis and oogenesis specific basic helix-loop-helix 1                 |
| 1,065108203 | 0,66311 | 1,194163187 | 0,01519 | SOHLH2    | spermatogenesis and oogenesis specific basic helix-loop-helix 2                 |
| 1,033830736 | 0,78693 | 0,842062954 | 0,01529 | SON       | SON DNA binding protein                                                         |
| 1,047536127 | 0,60965 | 1,109569472 | 0,04828 | SORBS1    | sorbin and SH3 domain containing 1                                              |
| 0,935623498 | 0,78489 | 0,725476104 | 0,01922 | SORBS1    | sorbin and SH3 domain containing 1                                              |
| 1,101141598 | 0,60053 | 1,257884972 | 0,03896 | SORBS2    | sorbin and SH3 domain containing 2                                              |
| 0,865736566 | 0,49992 | 0,732550437 | 0,00164 | SORD      | sorbitol dehydrogenase                                                          |
| 0,808320869 | 0,10736 | 0,752101876 | 0,00067 | SORL1     | sortilin-related receptor, L(DLR class) A repeats containing                    |
| 0,848507902 | 0,42519 | 0,843815796 | 0,03397 | SOS2      | son of sevenless homolog 2 (Drosophila)                                         |
| 0,948026965 | 0,58531 | 1,164733586 | 0,00775 | SOS2      | son of sevenless homolog 2 (Drosophila)                                         |
| 1,21167266  | 0,13029 | 1,388955136 | 0,00004 | SOX10     | SRY (sex determining region Y)-box 10                                           |
| 1,121943481 | 0,21227 | 1,122721422 | 0,02787 | SOX11     | SRY (sex determining region Y)-box 11                                           |
| 1,194991205 | 0,2089  | 1,301341855 | 0,002   | SOX13     | SRY (sex determining region Y)-box 13                                           |
| 1,261377409 | 0,19053 | 1,311302014 | 0,01144 | SOX13     | SRY (sex determining region Y)-box 13                                           |
| 1,019597683 | 0,82151 | 1,137605228 | 0,02966 | SOX14     | SRY (sex determining region Y)-box 14                                           |
| 0,686818117 | 0,09661 | 0,645728675 | 0,00247 | SOX2      | SRY (sex determining region Y)-box 2                                            |
| 1,056285625 | 0,52444 | 1,151089491 | 0,02944 | SOX5      | SRY (sex determining region Y)-box 5                                            |
| 1,082224645 | 0,42147 | 1,147902414 | 0,01393 | SOX5      | SRY (sex determining region Y)-box 5                                            |
| 0,604158922 | 0,05944 | 0,61985385  | 0,00011 | SOX6      | SRY (sex determining region Y)-box 6                                            |
| 0,652477474 | 0,12895 | 0,731028724 | 0,00028 | SOX7      | SRY (sex determining region Y)-box 7                                            |
| 0,650670928 | 0,05879 | 0,738669032 | 0,00378 | SOX7      | SRY (sex determining region Y)-box 7                                            |
| 0,787307977 | 0,28938 | 0,549046407 | 0,00042 | SOX9      | SRY (sex determining region Y)-box 9                                            |
| 0,934327347 | 0,54596 | 0,681601304 | 0,0006  | SOX9      | SRY (sex determining region Y)-box 9                                            |
| 0,849684999 | 0,25724 | 0,827596816 | 0,00375 | SP100     | SP100 nuclear antigen                                                           |
| 0,782954296 | 0,06595 | 0,660669203 | 0,00105 | SP100     | SP100 nuclear antigen                                                           |
| 0,948026965 | 0,69046 | 0,877213549 | 0,03642 | SP100     | SP100 nuclear antigen                                                           |
| 1,309485423 | 0,14001 | 1,237132479 | 0,00234 | SP140L    | SP140 nuclear body protein-like                                                 |
| 1,037419937 | 0,75293 | 0,81056512  | 0,01552 | SP2       | Sp2 transcription factor                                                        |
| 0,860352631 | 0,21262 | 0,834509281 | 0,01296 | SP3       | Sp3 transcription factor                                                        |
| 1,084477409 | 0,46535 | 1,128964405 | 0,03483 | SP7       | Sp7 transcription factor                                                        |
| 1,153485605 | 0,09208 | 1,130530567 | 0,04246 | SP8       | Sp8 transcription factor                                                        |
| 0,965936329 | 0,83118 | 0,85797053  | 0,02016 | SPA17     | sperm autoantigenic protein 17                                                  |
| 0,837987135 | 0,50827 | 0,612168196 | 0,0001  | SPAG1     | sperm associated antigen 1                                                      |
| 1,113421618 | 0,20634 | 1,196648963 | 0,00139 | SPAG11A   | sperm associated antigen 11A                                                    |
| 1,10343374  | 0,34627 | 1,168777249 | 0,01329 | SPAG11B   | sperm associated antigen 11B                                                    |
| 0,898755127 | 0,35066 | 0,869947353 | 0,0175  | SPAG17    | sperm associated antigen 17                                                     |
| 1,058484395 | 0,569   | 1,155886707 | 0,03513 | SPAG5-AS1 | SPAG5 antisense RNA 1 (non-protein coding)                                      |
| 1,051172909 | 0,55728 | 1,134455485 | 0,00893 | SPAG6     | sperm associated antigen 6                                                      |
| 0,547905883 | 0,0608  | 0,493800431 | 0,00001 | SPAG9     | sperm associated antigen 9                                                      |
| 0,72597914  | 0,12599 | 0,770037174 | 0,00013 | SPAG9     | sperm associated antigen 9                                                      |
| 1,068805991 | 0,35395 | 1,223488041 | 0,00041 | SPAM1     | sperm adhesion molecule 1 (PH-20 hyaluronidase, zona pellucida binding)         |
| 1,317679952 | 0,10267 | 1,284315809 | 0,01378 | SPARCL1   | SPARC-like 1 (hevin)                                                            |
| 0,840896415 | 0,47579 | 0,713507253 | 0,00142 | SPAST     | spastin                                                                         |
| 1,088997015 | 0,52768 | 1,454980684 | 0,00032 | SPATA13   | spermatogenesis associated 13                                                   |
| 0,730522189 | 0,13669 | 0,711531731 | 0,00026 | SPATA18   | spermatogenesis associated 18 homolog (rat)                                     |
| 1,180992661 | 0,1713  | 1,099616149 | 0,03572 | SPATA19   | spermatogenesis associated 19                                                   |
| 1,076986376 | 0,7381  | 1,282536603 | 0,01444 | SPATA20   | spermatogenesis associated 20                                                   |
| 1,191682575 | 0,13318 | 1,154285418 | 0,01538 | SPATA24   | spermatogenesis associated 24                                                   |
| 0,929160674 | 0,58377 | 0,793333843 | 0,01291 | SPATA2L   | spermatogenesis associated 2-like                                               |
| 1,074004472 | 0,5127  | 1,192508872 | 0,00201 | SPATA3    | spermatogenesis associated 3                                                    |
| 1,062895674 | 0,75791 | 0,821880187 | 0,0109  | SPATA5    | spermatogenesis associated 5                                                    |
| 0,77916458  | 0,11276 | 0,650670928 | 0,00008 | SPATA5L1  | spermatogenesis associated 5-like 1                                             |
| 0,894404902 | 0,39953 | 0,834509281 | 0,00966 | SPATA5L1  | spermatogenesis associated 5-like 1                                             |
| 0,786762445 | 0,21274 | 0,754712984 | 0,00006 | SPATA5L1  | spermatogenesis associated 5-like 1                                             |
| 0,940174203 | 0,60185 | 0,832198735 | 0,00065 | SPATA6    | spermatogenesis associated 6                                                    |
| 1,020304659 | 0,82287 | 1,185914499 | 0,00591 | SPATA8    | spermatogenesis associated 8                                                    |
| 1,234562607 | 0,12724 | 1,17609125  | 0,034   | SPATS2    | spermatogenesis associated, serine-rich 2                                       |
| 1,658639092 | 0,05027 | 1,407368375 | 0,00112 | SPATS2    | spermatogenesis associated, serine-rich 2                                       |
| 0,998614666 | 0,98915 | 1,207480591 | 0,02421 | SPATS2L   | spermatogenesis associated, serine-rich 2-like                                  |
| 1,004167543 | 0,97653 | 0,84323111  | 0,00202 | SPC25     | SPC25, NDC80 kinetochore complex component, homolog (S. cerevisiae)             |
| 1,105730653 | 0,3007  | 1,112650121 | 0,02135 | SPDEF     | SAM pointed domain containing ets transcription factor                          |
| 1,187559666 | 0,1676  | 1,200803427 | 0,00598 | SPDEF     | SAM pointed domain containing ets transcription factor                          |
| 1,051901779 | 0,67897 | 1,254402205 | 0,00042 | SPDEF     | SAM pointed domain containing ets transcription factor                          |
| 1,121943481 | 0,15247 | 1,121166078 | 0,00761 | SPDYA     | speedy homolog A (Xenopus laevis)                                               |
| 0,90312651  | 0,45801 | 0,722465199 | 0,00133 | SPDYE1    | speedy homolog E1 (Xenopus laevis)                                              |

|             |         |             |         |           |                                                                                                      |
|-------------|---------|-------------|---------|-----------|------------------------------------------------------------------------------------------------------|
| 0,986232704 | 0,85723 | 1,095052471 | 0,03155 | SPECC1    | sperm antigen with calponin homology and coiled-coil domains 1                                       |
| 1,030968319 | 0,78412 | 1,153485605 | 0,00664 | SPECC1L   | sperm antigen with calponin homology and coiled-coil domains 1-like                                  |
| 0,899378312 | 0,2125  | 0,87417862  | 0,03304 | SPEF2     | sperm flagellar 2                                                                                    |
| 1,063632673 | 0,55989 | 1,155886707 | 0,02362 | SPEM1     | spermatid maturation 1                                                                               |
| 0,638606688 | 0,17731 | 0,577142709 | 0,00009 | SPEN      | spen homolog, transcriptional regulator (Drosophila)                                                 |
| 1,00486382  | 0,96307 | 1,139183377 | 0,01155 | SPERT     | spermatid associated                                                                                 |
| 0,787307977 | 0,1584  | 0,868140228 | 0,0292  | SPG11     | spastic paraplegia 11 (autosomal recessive)                                                          |
| 1,074004472 | 0,29277 | 1,148698355 | 0,00482 | SPG20     | spastic paraplegia 20 (Troyer syndrome)                                                              |
| 1,139973273 | 0,5753  | 0,791685866 | 0,00308 | SPG20     | spastic paraplegia 20 (Troyer syndrome)                                                              |
| 0,996540263 | 0,98363 | 0,819604608 | 0,01924 | SPG7      | spastic paraplegia 7 (pure and complicated autosomal recessive)                                      |
| 1,196648963 | 0,18154 | 1,182631    | 0,00402 | SPHK2     | sphingosine kinase 2                                                                                 |
| 0,588453369 | 0,0888  | 0,680657058 | 0,00044 | SPIN1     | spindlin 1                                                                                           |
| 0,703684188 | 0,0889  | 0,791137301 | 0,00148 | SPIN1     | spindlin 1                                                                                           |
| 0,740206649 | 0,27495 | 0,604997045 | 0,00007 | SPIN4     | spindlin family, member 4                                                                            |
| 1,042465761 | 0,69813 | 0,871154192 | 0,04608 | SPINK2    | serine peptidase inhibitor, Kazal type 2 (acrosin-trypsin inhibitor)                                 |
| 1,116512962 | 0,33447 | 1,22010051  | 0,00041 | SPINK4    | serine peptidase inhibitor, Kazal type 4                                                             |
| 0,844400887 | 0,19512 | 0,722966147 | 0,03785 | SPINK6    | serine peptidase inhibitor, Kazal type 6                                                             |
| 1,118837101 | 0,48413 | 1,174461971 | 0,03226 | SPINT1    | serine peptidase inhibitor, Kunitz type 1                                                            |
| 0,959264119 | 0,59293 | 1,126619228 | 0,0223  | SPIRE2    | spire homolog 2 (Drosophila)                                                                         |
| 1,216722359 | 0,14757 | 1,231998073 | 0,01494 | SPN       | sialoporphin                                                                                         |
| 1,332374825 | 0,1131  | 1,25092908  | 0,02937 | SPOCK2    | sparc/osteonectin, cwcv and kazal-like domains proteoglycan (testican) 2                             |
| 1,379360922 | 0,08782 | 1,368883813 | 0,01079 | SPON1     | spondin 1, extracellular matrix protein                                                              |
| 1,335148303 | 0,15091 | 1,409320755 | 0,01446 | SPON1     | spondin 1, extracellular matrix protein                                                              |
| 0,978063473 | 0,81737 | 1,244874235 | 0,00451 | SPON1     | spondin 1, extracellular matrix protein                                                              |
| 0,849684999 | 0,68061 | 1,164733586 | 0,0193  | SPOP      | speckle-type POZ protein                                                                             |
| 1,037419937 | 0,68694 | 1,113421618 | 0,03384 | SPOP      | speckle-type POZ protein                                                                             |
| 0,729510172 | 0,16909 | 0,667574152 | 0,00347 | SPOPL     | speckle-type POZ protein-like                                                                        |
| 1,122721422 | 0,28289 | 1,196648963 | 0,00574 | SPP2      | secreted phosphoprotein 2, 24kDa                                                                     |
| 1,104964485 | 0,2794  | 1,317679952 | 0,0005  | SPPL2B    | signal peptide peptidase-like 2B                                                                     |
| 0,682073917 | 0,08643 | 0,828170661 | 0,0355  | SPPL3     | signal peptide peptidase-like 3                                                                      |
| 1,003471749 | 0,98649 | 0,750019495 | 0,00759 | SPRED1    | sprouty-related, EVH1 domain containing 1                                                            |
| 0,654289036 | 0,05841 | 0,882702996 | 0,03631 | SPRR1A    | small proline-rich protein 1A                                                                        |
| 1,079228237 | 0,5025  | 1,275444392 | 0,00715 | SPRR4     | small proline-rich protein 4                                                                         |
| 0,754190038 | 0,06896 | 0,71400199  | 0,00409 | SPRY4     | sprouty homolog 4 (Drosophila)                                                                       |
| 1,242288282 | 0,08785 | 1,306765254 | 0,00134 | SPRY4     | sprouty homolog 4 (Drosophila)                                                                       |
| 1,131314463 | 0,18006 | 1,152686347 | 0,01819 | SPRY4-IT1 | SPRY4 intronic transcript 1 (non-protein coding)                                                     |
| 1,062159186 | 0,6653  | 1,203303026 | 0,02338 | SPRY4-IT1 | SPRY4 intronic transcript 1 (non-protein coding)                                                     |
| 0,799960128 | 0,12282 | 0,756283999 | 0,00028 | SPRYD7    | SPRY domain containing 7                                                                             |
| 0,973329374 | 0,81799 | 1,178539408 | 0,04806 | SPSB1     | splA/ryanodine receptor domain and SOCS box containing 1                                             |
| 1,083725967 | 0,38204 | 1,113421618 | 0,04405 | SPTB      | spectrin, beta, erythrocytic                                                                         |
| 0,933679945 | 0,61752 | 0,734584317 | 0,00816 | SPTLC1    | serine palmitoyltransferase, long chain base subunit 1                                               |
| 0,74277646  | 0,12349 | 0,756808396 | 0,00105 | SPTLC1    | serine palmitoyltransferase, long chain base subunit 1                                               |
| 0,817902059 | 0,11478 | 0,876605721 | 0,02007 | SPTLC2    | serine palmitoyltransferase, long chain base subunit 2                                               |
| 0,709070018 | 0,18119 | 0,817902059 | 0,00951 | SPTLC2    | serine palmitoyltransferase, long chain base subunit 2                                               |
| 0,706127202 | 0,2555  | 0,734075318 | 0,00494 | SPTLC2    | serine palmitoyltransferase, long chain base subunit 2                                               |
| 0,869947353 | 0,2454  | 0,797192477 | 0,03636 | SPTSSA    | serine palmitoyltransferase, small subunit A                                                         |
| 0,832775771 | 0,12223 | 0,816768991 | 0,00189 | SPTSSA    | serine palmitoyltransferase, small subunit A                                                         |
| 1,019597683 | 0,87241 | 0,820172911 | 0,00243 | SPTSSB    | serine palmitoyltransferase, small subunit B                                                         |
| 1,018891197 | 0,92249 | 0,807201075 | 0,00104 | SPTY2D1   | SPT2, Suppressor of Ty, domain containing 1 (S. cerevisiae)                                          |
| 0,849096246 | 0,28467 | 0,616426163 | 0       | SQLE      | squalene epoxidase                                                                                   |
| 1,030253954 | 0,89397 | 1,196648963 | 0,0008  | SQSTM1    | sequestosome 1                                                                                       |
| 1,293248932 | 0,24355 | 1,168777249 | 0,01705 | SRBD1     | S1 RNA binding domain 1                                                                              |
| 0,961260928 | 0,79821 | 1,195819797 | 0,02939 | SRC       | v-src sarcoma (Schmidt-Ruppin A-2) viral oncogene homolog (avian)                                    |
| 1,164733586 | 0,19043 | 1,180174343 | 0,00609 | SRC       | v-src sarcoma (Schmidt-Ruppin A-2) viral oncogene homolog (avian)                                    |
| 1,145517898 | 0,29104 | 1,20664392  | 0,00226 | SRCAP     | Snf2-related CREBBP activator protein                                                                |
| 1,121166078 | 0,22574 | 1,185914499 | 0,00693 | SRCAP     | Snf2-related CREBBP activator protein                                                                |
| 0,763658749 | 0,24848 | 0,744838732 | 0,00335 | SRD5A1    | steroid-5-alpha-reductase, alpha polypeptide 1 (3-oxo-5 alpha-steroid delta 4-dehydrogenase alpha 1) |
| 0,886996305 | 0,42827 | 0,782411782 | 0,02243 | SRD5A1    | steroid-5-alpha-reductase, alpha polypeptide 1 (3-oxo-5 alpha-steroid delta 4-dehydrogenase alpha 1) |
| 0,827023368 | 0,06633 | 0,885767519 | 0,02056 | SRD5A1    | steroid-5-alpha-reductase, alpha polypeptide 1 (3-oxo-5 alpha-steroid delta 4-dehydrogenase alpha 1) |
| 1,054822317 | 0,46394 | 1,142346247 | 0,01688 | SRD5A2    | steroid-5-alpha-reductase, alpha polypeptide 2 (3-oxo-5 alpha-steroid delta 4-dehydrogenase alpha 2) |
| 0,927230546 | 0,65091 | 0,791685866 | 0,01585 | SRD5A3    | steroid 5 alpha-reductase 3                                                                          |
| 0,79940583  | 0,3216  | 0,746906729 | 0,00245 | SRD5A3    | steroid 5 alpha-reductase 3                                                                          |
| 1,014662547 | 0,94139 | 0,66342257  | 0,00057 | SREK1     | splicing regulatory glutamine/lysine-rich protein 1                                                  |
| 0,839149637 | 0,43174 | 0,730016005 | 0,01025 | SREK1     | splicing regulatory glutamine/lysine-rich protein 1                                                  |
| 0,837987135 | 0,37387 | 0,71400199  | 0,00405 | SRFBP1    | serum response factor binding protein 1                                                              |
| 0,879039561 | 0,53169 | 0,765778999 | 0,00987 | SRGAP1    | SLIT-ROBO Rho GTPase activating protein 1                                                            |
| 0,944092419 | 0,70853 | 0,764718139 | 0,00896 | SRGAP1    | SLIT-ROBO Rho GTPase activating protein 1                                                            |
| 1,121943481 | 0,25262 | 1,293248932 | 0,00014 | SRGAP2    | SLIT-ROBO Rho GTPase activating protein 2                                                            |
| 0,763658749 | 0,06288 | 0,813379198 | 0,01127 | SRGAP2P1  | SLIT-ROBO Rho GTPase activating protein 2 pseudogene 1                                               |
| 2,256364275 | 0,09872 | 2,0363704   | 0,00136 | SRGN      | serglycin                                                                                            |
| 0,756808396 | 0,18331 | 0,737134609 | 0,00295 | SRI       | sorcini                                                                                              |
| 1,159899655 | 0,64958 | 1,250062303 | 0,0269  | SRM       | spermidine synthase                                                                                  |
| 0,965267025 | 0,66107 | 0,906890329 | 0,04779 | SRP19     | signal recognition particle 19kDa                                                                    |
| 0,84323111  | 0,24497 | 0,859756486 | 0,00597 | SRP72     | signal recognition particle 72kDa                                                                    |
| 0,965267025 | 0,85082 | 0,802737389 | 0,0087  | SRP72     | signal recognition particle 72kDa                                                                    |
| 0,852634892 | 0,24665 | 0,798851916 | 0,01629 | SRP9      | signal recognition particle 9kDa                                                                     |
| 0,738157203 | 0,18458 | 0,808320869 | 0,00274 | SRPK1     | SRSF protein kinase 1                                                                                |
| 0,66342257  | 0,06125 | 0,738639032 | 0,01804 | SRPK2     | SRSF protein kinase 2                                                                                |
| 1,319507911 | 0,09542 | 1,199139914 | 0,01116 | SRPR      | signal recognition particle receptor (docking protein)                                               |
| 1,17609125  | 0,06181 | 1,167158102 | 0,03575 | SRPRB     | signal recognition particle receptor, B subunit                                                      |
| 1,313121125 | 0,29532 | 1,358486285 | 0,00175 | SRPRB     | signal recognition particle receptor, B subunit                                                      |
| 1,155085785 | 0,33511 | 1,212512819 | 0,03423 | SRPX2     | sushi-repeat containing protein, X-linked 2                                                          |
| 0,885153765 | 0,4501  | 0,820172911 | 0,00918 | SRR       | serine racemase                                                                                      |
| 1,059952783 | 0,68834 | 0,890075733 | 0,01686 | SRRM1     | serine/arginine repetitive matrix 1                                                                  |
| 1,094293701 | 0,59408 | 1,182631    | 0,0189  | SRRM2     | serine/arginine repetitive matrix 2                                                                  |
| 0,995849753 | 0,96543 | 1,241427492 | 0,01852 | SRRM2     | serine/arginine repetitive matrix 2                                                                  |
| 1,128182137 | 0,17321 | 1,178539408 | 0,01493 | SRRM4     | serine/arginine repetitive matrix 4                                                                  |
| 1,086734863 | 0,44767 | 1,172834949 | 0,00188 | SRRM4     | serine/arginine repetitive matrix 4                                                                  |
| 0,67689314  | 0,05931 | 0,799960128 | 0,01693 | SRSF1     | serine/arginine-rich splicing factor 1                                                               |
| 0,791685866 | 0,15851 | 0,777546036 | 0,01293 | SRSF10    | serine/arginine-rich splicing factor 10                                                              |
| 0,724471077 | 0,10236 | 0,775930854 | 0,01213 | SRSF11    | serine/arginine-rich splicing factor 11                                                              |
| 0,866336856 | 0,48453 | 0,87417862  | 0,02319 | SRSF11    | serine/arginine-rich splicing factor 11                                                              |
| 0,881480158 | 0,69469 | 0,682073917 | 0,00011 | SRSF11    | serine/arginine-rich splicing factor 11                                                              |
| 0,71548826  | 0,12089 | 0,739693755 | 0,00123 | SRSF3     | serine/arginine-rich splicing factor 3                                                               |
| 0,924663278 | 0,75028 | 0,839149637 | 0,00161 | SRSF4     | serine/arginine-rich splicing factor 4                                                               |
| 0,867538687 | 0,42872 | 0,807201075 | 0,00315 | SRSF7     | serine/arginine-rich splicing factor 7                                                               |
| 0,774319028 | 0,54587 | 0,730522189 | 0,0001  | SRSF7     | serine/arginine-rich splicing factor 7                                                               |
| 0,651573575 | 0,05682 | 0,704660378 | 0       | SRSF8     | serine/arginine-rich splicing factor 8                                                               |
| 1,185914499 | 0,19046 | 0,882091365 | 0,00622 | SRSF9     | serine/arginine-rich splicing factor 9                                                               |
| 0,76101669  | 0,09471 | 0,771640088 | 0,00062 | SRXN1     | sulfiredoxin 1                                                                                       |
| 0,740206649 | 0,21046 | 0,775930854 | 0,00498 | SS18L1    | synovial sarcoma translocation gene on chromosome 18-like 1                                          |
| 0,883927531 | 0,14487 | 0,838568184 | 0,0006  | SS18L2    | synovial sarcoma translocation gene on chromosome 18-like 2                                          |
| 0,666187413 | 0,33844 | 0,778624691 | 0,00012 | SSB       | Sjogren syndrome antigen B (autoantigen la)                                                          |
| 0,941478465 | 0,61813 | 0,76418826  | 0,00572 | SSBP1     | single-stranded DNA binding protein 1                                                                |

|             |         |             |         |            |                                                                                                              |
|-------------|---------|-------------|---------|------------|--------------------------------------------------------------------------------------------------------------|
| 1,229438867 | 0,06422 | 1,167967395 | 0,0388  | SSBP4      | single stranded DNA binding protein 4                                                                        |
| 1,162314108 | 0,27059 | 1,141554707 | 0,03814 | SSBP4      | single stranded DNA binding protein 4                                                                        |
| 0,683967652 | 0,05872 | 0,744322628 | 0,00429 | SSFA2      | sperm specific antigen 2                                                                                     |
| 0,789493887 | 0,29284 | 0,762072415 | 0,00012 | SSFA2      | sperm specific antigen 2                                                                                     |
| 1,422077411 | 0,12601 | 1,272794935 | 0,03376 | SSPN       | sarcospan (Kras oncogene-associated gene)                                                                    |
| 1,114966219 | 0,41677 | 1,121166078 | 0,01403 | SSR1       | signal sequence receptor, alpha                                                                              |
| 1,101141598 | 0,58725 | 1,315854525 | 0,00003 | SSR2       | signal sequence receptor, beta (translocon-associated protein beta)                                          |
| 1,063632673 | 0,7897  | 1,305859787 | 0,00232 | SSR3       | signal sequence receptor, gamma (translocon-associated protein gamma)                                        |
| 1,264879542 | 0,41612 | 1,79129134  | 0,00001 | SSR4       | signal sequence receptor, delta                                                                              |
| 0,704660378 | 0,11826 | 0,842062954 | 0,00527 | SSRP1      | structure specific recognition protein 1                                                                     |
| 1,006257823 | 0,97756 | 1,158292806 | 0,01418 | SSSCA1     | Sjogren syndrome/scleroderma autoantigen 1                                                                   |
| 1,151887642 | 0,16553 | 1,184271612 | 0,01671 | SSTR2      | somatostatin receptor 2                                                                                      |
| 1,127400412 | 0,17148 | 1,205807828 | 0,00621 | SSTR2      | somatostatin receptor 2                                                                                      |
| 1,058484395 | 0,52307 | 1,110338834 | 0,03424 | SSTR3      | somatostatin receptor 3                                                                                      |
| 0,964598185 | 0,78214 | 1,191682575 | 0,01273 | SSTR4      | somatostatin receptor 4                                                                                      |
| 0,927230546 | 0,29609 | 0,910669834 | 0,03932 | SSU72      | SSU72 RNA polymerase II CTD phosphatase homolog (S. cerevisiae)                                              |
| 0,890692901 | 0,18463 | 0,924022572 | 0,02375 | SSX1       | synovial sarcoma, X breakpoint 1                                                                             |
| 0,779704843 | 0,26915 | 0,651122095 | 0,00016 | SSX2IP     | synovial sarcoma, X breakpoint 2 interacting protein                                                         |
| 0,683967652 | 0,13236 | 0,6341957   | 0,00035 | SSX2IP     | synovial sarcoma, X breakpoint 2 interacting protein                                                         |
| 1,241427492 | 0,11804 | 1,184271612 | 0,00138 | SSX3       | synovial sarcoma, X breakpoint 3                                                                             |
| 1,038859103 | 0,68371 | 1,237132479 | 0,00105 | SSX3       | synovial sarcoma, X breakpoint 3                                                                             |
| 0,858565436 | 0,39946 | 0,76684133  | 0,00377 | ST13       | suppression of tumorigenicity 13 (colon carcinoma) (Hsp70 interacting protein)                               |
| 0,760489377 | 0,12464 | 0,813379198 | 0,00002 | ST13       | suppression of tumorigenicity 13 (colon carcinoma) (Hsp70 interacting protein)                               |
| 1,092777739 | 0,49494 | 1,28877463  | 0,00169 | ST3GAL1    | ST3 beta-galactoside alpha-2,3-sialyltransferase 1                                                           |
| 1,068065408 | 0,43711 | 1,110338834 | 0,04318 | ST3GAL2    | ST3 beta-galactoside alpha-2,3-sialyltransferase 2                                                           |
| 1,163120042 | 0,08722 | 1,178539408 | 0,00307 | ST3GAL3    | ST3 beta-galactoside alpha-2,3-sialyltransferase 3                                                           |
| 1,149494848 | 0,58825 | 1,336074078 | 0,00242 | ST5        | suppression of tumorigenicity 5                                                                              |
| 1,418140036 | 0,17152 | 1,474269217 | 0,00031 | ST6GALNAC4 | ST6 (alpha-N-acetyl-neuraminy-2,3-beta-galactosyl-1,3)-N-acetylgalactosaminide alpha-2,6-sialyltransferase 4 |
| 1,741101127 | 0,0586  | 1,435944511 | 0,00201 | ST6GALNAC4 | ST6 (alpha-N-acetyl-neuraminy-2,3-beta-galactosyl-1,3)-N-acetylgalactosaminide alpha-2,6-sialyltransferase 4 |
| 1,189207115 | 0,29107 | 1,202469249 | 0,02809 | ST6GALNAC4 | ST6 (alpha-N-acetyl-neuraminy-2,3-beta-galactosyl-1,3)-N-acetylgalactosaminide alpha-2,6-sialyltransferase 4 |
| 1,063632673 | 0,49185 | 1,111879158 | 0,01651 | ST7        | suppression of tumorigenicity 7                                                                              |
| 0,977385766 | 0,73606 | 0,891928519 | 0,01149 | ST7-AS2    | ST7 antisense RNA 2 (non-protein coding)                                                                     |
| 1,018891197 | 0,86466 | 1,159899655 | 0,02665 | STAB2      | stabilin 2                                                                                                   |
| 0,927230546 | 0,39159 | 1,278099363 | 0,00251 | STAC2      | SH3 and cysteine rich domain 2                                                                               |
| 0,786762445 | 0,17168 | 0,81056512  | 0,04716 | STAG1      | stromal antigen 1                                                                                            |
| 0,601234624 | 0,14019 | 0,748980467 | 0,00011 | STAG2      | stromal antigen 2                                                                                            |
| 0,81252396  | 0,33413 | 0,788946841 | 0,00084 | STAG2      | stromal antigen 2                                                                                            |
| 1,02313747  | 0,95592 | 0,787853886 | 0,00144 | STAG2      | stromal antigen 2                                                                                            |
| 1,167967395 | 0,10388 | 1,182631    | 0,00488 | STAG3      | stromal antigen 3                                                                                            |
| 0,781869643 | 0,17608 | 0,731028724 | 0,00614 | STAM       | signal transducing adaptor molecule (SH3 domain and ITAM motif) 1                                            |
| 0,846745312 | 0,42077 | 0,753667455 | 0,01726 | STAM2      | signal transducing adaptor molecule (SH3 domain and ITAM motif) 2                                            |
| 0,77916458  | 0,06145 | 0,81252396  | 0,01041 | STAM2      | signal transducing adaptor molecule (SH3 domain and ITAM motif) 2                                            |
| 0,793333843 | 0,09274 | 0,804966138 | 0,00032 | STAM2      | signal transducing adaptor molecule (SH3 domain and ITAM motif) 2                                            |
| 0,909408252 | 0,52668 | 0,762072415 | 0,00189 | STAM2      | signal transducing adaptor molecule (SH3 domain and ITAM motif) 2                                            |
| 0,835087919 | 0,24392 | 0,862741345 | 0,01976 | STAMBIP    | STAM binding protein                                                                                         |
| 1,141554707 | 0,30903 | 1,117287138 | 0,01729 | STAMBIP    | STAM binding protein                                                                                         |
| 1,102669163 | 0,57466 | 0,81252396  | 0,03336 | STAT1      | signal transducer and activator of transcription 1, 91kDa                                                    |
| 1,069547088 | 0,68244 | 0,796640096 | 0,02787 | STAT1      | signal transducer and activator of transcription 1, 91kDa                                                    |
| 1,279872414 | 0,05433 | 1,257884972 | 0,00519 | STAT2      | signal transducer and activator of transcription 2, 113kDa                                                   |
| 1,083725967 | 0,44572 | 1,222640278 | 0,01231 | STAT5B     | signal transducer and activator of transcription 5B                                                          |
| 1,155085785 | 0,05815 | 1,108032348 | 0,04031 | STAU2      | staufen, RNA binding protein, homolog 2 (Drosophila)                                                         |
| 1,036701101 | 0,77611 | 1,20163605  | 0,00807 | STC1       | stanniocalcin 1                                                                                              |
| 1,127400412 | 0,41733 | 1,149494848 | 0,01471 | STC2       | stanniocalcin 2                                                                                              |
| 1,115739322 | 0,4879  | 0,823020345 | 0,02463 | STEAP1B    | STEAP family member 1B                                                                                       |
| 0,763658749 | 0,07189 | 0,806641759 | 0,00578 | STEAP4     | STEAP family member 4                                                                                        |
| 0,943438251 | 0,6107  | 1,152686347 | 0,02808 | STGC3      | hypothetical STGC3                                                                                           |
| 1,028826708 | 0,88911 | 0,774855931 | 0,0027  | STIL       | SCL/TAL1 interrupting locus                                                                                  |
| 0,97874165  | 0,82124 | 0,852634892 | 0,00507 | STIM2      | stromal interaction molecule 2                                                                               |
| 1,149494848 | 0,16256 | 1,304050735 | 0,00089 | STK10      | serine/threonine kinase 10                                                                                   |
| 1,136816973 | 0,16543 | 1,154285418 | 0,00941 | STK10      | serine/threonine kinase 10                                                                                   |
| 1,129747215 | 0,4708  | 1,366040257 |         | STK16      | serine/threonine kinase 16                                                                                   |
| 1,175276328 | 0,47086 | 0,869947353 | 0,00214 | STK17A     | serine/threonine kinase 17a                                                                                  |
| 0,744838732 | 0,07071 | 0,811689581 | 0,02341 | STK24      | serine/threonine kinase 24                                                                                   |
| 0,868140228 | 0,25505 | 0,883927531 | 0,00265 | STK24      | serine/threonine kinase 24                                                                                   |
| 0,740719899 | 0,0762  | 0,737134609 | 0,00025 | STK24      | serine/threonine kinase 24                                                                                   |
| 0,81056512  | 0,32288 | 0,825305409 | 0,00821 | STK3       | serine/threonine kinase 3                                                                                    |
| 1,116512962 | 0,26889 | 1,190031696 | 0,00936 | STK33      | serine/threonine kinase 33                                                                                   |
| 0,968618189 | 0,76695 | 1,20163605  | 0,01066 | STK35      | serine/threonine kinase 35                                                                                   |
| 0,767905135 | 0,07945 | 0,742261785 | 0,00005 | STK35      | serine/threonine kinase 35                                                                                   |
| 0,988970916 | 0,91546 | 1,16634937  | 0,01366 | STK36      | serine/threonine kinase 36                                                                                   |
| 1,015366101 | 0,89327 | 1,159095952 | 0,00147 | STK36      | serine/threonine kinase 36                                                                                   |
| 1,000693387 | 0,99549 | 1,151089491 | 0,01756 | STK36      | serine/threonine kinase 36                                                                                   |
| 0,71548826  | 0,13661 | 0,790041312 | 0,02042 | STK38      | serine/threonine kinase 38                                                                                   |
| 0,830470024 | 0,28956 | 0,829894586 | 0,01569 | STK38L     | serine/threonine kinase 38 like                                                                              |
| 0,885153765 | 0,5479  | 0,763129604 | 0,00946 | STK38L     | serine/threonine kinase 38 like                                                                              |
| 1,109569472 | 0,36264 | 1,144724161 | 0,04378 | STK4       | serine/threonine kinase 4                                                                                    |
| 1,016774673 | 0,87393 | 0,915099168 | 0,04225 | STMN1      | stathmin 1                                                                                                   |
| 1,07997656  | 0,30018 | 1,114193651 | 0,03426 | STMN4      | stathmin-like 4                                                                                              |
| 1,390881972 | 0,12944 | 1,337927555 | 0,01135 | STON1      | stonin 1                                                                                                     |
| 1,027401439 | 0,80915 | 1,153485605 | 0,0109  | STON1      | stonin 1                                                                                                     |
| 0,796640096 | 0,30738 | 0,735603373 | 0,00288 | STOX2      | storkhead box 2                                                                                              |
| 0,951977908 | 0,60894 | 0,838568184 | 0,04214 | STOX2      | storkhead box 2                                                                                              |
| 1,169587664 | 0,20759 | 1,215879283 | 0,00029 | STRA6      | stimulated by retinoic acid gene 6 homolog (mouse)                                                           |
| 1,056285625 | 0,57571 | 1,156688184 | 0,00363 | STRADA     | STE20-related kinase adaptor alpha                                                                           |
| 1,032398535 | 0,78815 | 1,165541198 | 0,01347 | STRADA     | STE20-related kinase adaptor alpha                                                                           |
| 1,00695555  | 0,91544 | 1,112650121 | 0,02849 | STRADA     | STE20-related kinase adaptor alpha                                                                           |
| 0,829319546 | 0,40182 | 0,768970416 | 0,01077 | STRAP      | serine/threonine kinase receptor associated protein                                                          |
| 0,991716731 | 0,95583 | 0,736113431 | 0,00331 | STRBP      | spermatid perinuclear RNA binding protein                                                                    |
| 0,995159722 | 0,97149 | 0,846158597 | 0,01003 | STRBP      | spermatid perinuclear RNA binding protein                                                                    |
| 0,910038824 | 0,54619 | 0,806641759 | 0,00623 | STRN       | striatin, calmodulin binding protein                                                                         |
| 0,852634892 | 0,40297 | 0,844400887 | 0,02403 | STRN       | striatin, calmodulin binding protein                                                                         |
| 0,764718139 | 0,29327 | 0,784584098 | 0,00996 | STRN       | striatin, calmodulin binding protein                                                                         |
| 1,256142381 | 0,05347 | 1,187559666 | 0,01332 | STS        | steroid sulfatase (microsomal), isozyme S                                                                    |
| 1,312211255 | 0,31063 | 0,756808396 | 0,00456 | STT3B      | STT3, subunit of the oligosaccharyltransferase complex, homolog B (S. cerevisiae)                            |
| 0,898132373 | 0,26144 | 0,70514898  | 0,00126 | STX11      | syntaxin 11                                                                                                  |
| 0,758909626 | 0,05465 | 0,832757771 | 0,00263 | STX12      | syntaxin 12                                                                                                  |
| 0,747424624 | 0,30637 | 0,86934456  | 0,02508 | STX17      | syntaxin 17                                                                                                  |
| 1,154285418 | 0,09451 | 1,194991205 | 0,00115 | STX1A      | syntaxin 1A (brain)                                                                                          |
| 0,788946841 | 0,11793 | 0,843815796 | 0,00179 | STX6       | syntaxin 6                                                                                                   |
| 0,891928519 | 0,23931 | 0,863938187 | 0,02418 | STX6       | syntaxin 6                                                                                                   |
| 0,765248385 | 0,11471 | 0,821880187 | 0,00331 | STX7       | syntaxin 7                                                                                                   |
| 0,874784765 | 0,50327 | 0,773782497 | 0,00206 | STXBP3     | syntaxin binding protein 3                                                                                   |
| 0,751059963 | 0,2125  | 0,671286251 | 0,00265 | STXBP3     | syntaxin binding protein 3                                                                                   |
| 1,138394029 | 0,33899 | 0,90062598  | 0,01602 | STXBP5L    | syntaxin binding protein 5-like                                                                              |



|             |         |             |         |          |                                                                                            |
|-------------|---------|-------------|---------|----------|--------------------------------------------------------------------------------------------|
| 1,065108203 | 0,78722 | 0,825305409 | 0,03525 | STXBP6   | syntaxin binding protein 6 (amisyn)                                                        |
| 0,833353207 | 0,42017 | 0,846745312 | 0,01458 | STYX     | serine/threonine/tyrosine interacting protein                                              |
| 0,922103118 | 0,66472 | 1,224336392 | 0,00203 | STYXL1   | serine/threonine/tyrosine interacting-like 1                                               |
| 0,829894586 | 0,30841 | 1,173648178 | 0,01356 | STYXL1   | serine/threonine/tyrosine interacting-like 1                                               |
| 0,933032992 | 0,69703 | 1,186736798 | 0,00123 | STYXL1   | serine/threonine/tyrosine interacting-like 1                                               |
| 0,756283999 | 0,13136 | 0,839149637 | 0,00352 | SUB1     | SUB1 homolog (S. cerevisiae)                                                               |
| 0,948684315 | 0,81317 | 0,77916458  | 0,01697 | SUB1     | SUB1 homolog (S. cerevisiae)                                                               |
| 0,775393206 | 0,2755  | 0,734584317 | 0,00093 | SUCLA2   | succinate-CoA ligase, ADP-forming, beta subunit                                            |
| 0,906890329 | 0,62592 | 0,87175824  | 0,01688 | SUCLG2   | succinate-CoA ligase, GDP-forming, beta subunit                                            |
| 0,857376037 | 0,46517 | 0,845572287 | 0,00925 | SUCLG2   | succinate-CoA ligase, GDP-forming, beta subunit                                            |
| 0,755759964 | 0,24634 | 0,815637493 | 0,01393 | SUDS3    | suppressor of defective silencing 3 homolog (S. cerevisiae)                                |
| 0,908148418 | 0,6668  | 0,770037174 | 0,00435 | SUGT1    | SGT1, suppressor of G2 allele of SKP1 (S. cerevisiae)                                      |
| 1,185914499 | 0,09774 | 1,342572503 | 0,02315 | SULF1    | sulfatase 1                                                                                |
| 1,094293701 | 0,58617 | 1,273677475 | 0,00548 | SULT1A1  | sulfotransferase family, cytosolic, 1A, phenol-preferring, member 1                        |
| 0,937571096 | 0,80384 | 1,241427492 | 0,01545 | SULT1A1  | sulfotransferase family, cytosolic, 1A, phenol-preferring, member 1                        |
| 0,952637998 | 0,7789  | 1,158292806 | 0,0021  | SULT1A2  | sulfotransferase family, cytosolic, 1A, phenol-preferring, member 2                        |
| 0,96727633  | 0,83976 | 1,248330549 | 0,00136 | SULT1A2  | sulfotransferase family, cytosolic, 1A, phenol-preferring, member 2                        |
| 1,088242442 | 0,27139 | 1,187559666 | 0,0044  | SULT2A1  | sulfotransferase family, cytosolic, 2A, dehydroepiandrosterone (DHEA)-preferring, member 1 |
| 0,627201102 | 0,08441 | 0,825305409 | 0,0499  | SULT2B1  | sulfotransferase family, cytosolic, 2B, member 1                                           |
| 0,883927531 | 0,65357 | 0,778624691 | 0,02067 | SUMO1    | SMT3 suppressor of mif two 3 homolog 1 (S. cerevisiae)                                     |
| 0,754190038 | 0,07955 | 0,796088099 | 0,00001 | SUMO1    | SMT3 suppressor of mif two 3 homolog 1 (S. cerevisiae)                                     |
| 1,167158102 | 0,1148  | 1,191682575 | 0,00849 | SUOX     | sulfite oxidase                                                                            |
| 0,958599438 | 0,82081 | 1,207480591 | 0,0325  | SUPT6H   | suppressor of Ty 6 homolog (S. cerevisiae)                                                 |
| 0,874784765 | 0,10825 | 0,820172911 | 0,00984 | SURF2    | surfeit 2                                                                                  |
| 0,937571096 | 0,81527 | 1,136029265 | 0,01219 | SURF4    | surfeit 4                                                                                  |
| 1,155085785 | 0,27859 | 1,118837101 | 0,03505 | SUSD1    | sushi domain containing 1                                                                  |
| 1,312211255 | 0,05437 | 1,33422317  | 0,00058 | SUSD3    | sushi domain containing 3                                                                  |
| 0,946057647 | 0,48528 | 0,847332435 | 0,04159 | SUSD5    | sushi domain containing 5                                                                  |
| 0,953298545 | 0,58961 | 1,155085785 | 0,02924 | SUV39H1  | suppressor of variegation 3-9 homolog 1 (Drosophila)                                       |
| 0,876605721 | 0,46331 | 0,71946679  | 0,00016 | SUV39H2  | suppressor of variegation 3-9 homolog 2 (Drosophila)                                       |
| 0,940826108 | 0,45818 | 0,887611337 | 0,00731 | SUV39H2  | suppressor of variegation 3-9 homolog 2 (Drosophila)                                       |
| 0,867538687 | 0,54112 | 0,776468875 | 0,00099 | SUV420H1 | suppressor of variegation 4-20 homolog 1 (Drosophila)                                      |
| 1,071773463 | 0,328   | 1,17772279  | 0,00207 | SV2B     | synaptic vesicle glycoprotein 2B                                                           |
| 1,111879158 | 0,16283 | 1,203303026 | 0,00183 | SV2C     | synaptic vesicle glycoprotein 2C                                                           |
| 0,955282936 | 0,59809 | 0,892546971 | 0,02881 | SVEP1    | sushi, von Willebrand factor type A, EGF and pentraxin domain containing 1                 |
| 1,150291893 | 0,19972 | 1,209994089 | 0,04168 | SVEP1    | sushi, von Willebrand factor type A, EGF and pentraxin domain containing 1                 |
| 0,96727633  | 0,73013 | 0,865136691 | 0,01872 | SVEP1    | sushi, von Willebrand factor type A, EGF and pentraxin domain containing 1                 |
| 1,190856849 | 0,17169 | 1,350974085 | 0,00006 | SVEP1    | sushi, von Willebrand factor type A, EGF and pentraxin domain containing 1                 |
| 0,78132788  | 0,20106 | 0,866937564 | 0,00267 | SVIL     | supervillin                                                                                |
| 1,144724161 | 0,11417 | 1,154285418 | 0,00726 | SVOP     | SVOP-like                                                                                  |
| 0,840896415 | 0,20434 | 0,842062954 | 0,04174 | SWAP70   | SWAP switching B-cell complex 70kDa subunit                                                |
| 1,151089491 | 0,26564 | 1,148698355 | 0,01048 | SWAP70   | SWAP switching B-cell complex 70kDa subunit                                                |
| 1,07997656  | 0,42877 | 1,20664392  | 0,00266 | SWT1     | SWT1 RNA endoribonuclease homolog (S. cerevisiae)                                          |
| 1,105730653 | 0,3764  | 1,171210181 | 0,03436 | SYCE2    | synaptonemal complex central element protein 2                                             |
| 1,038859103 | 0,63378 | 1,175276328 | 0,0003  | SYCN     | syncoilin                                                                                  |
| 1,076240125 | 0,68443 | 0,859160755 | 0,02316 | SYK      | spleen tyrosine kinase                                                                     |
| 0,973329374 | 0,78881 | 1,184271612 | 0,04138 | SYMPK    | symplekin                                                                                  |
| 1,057018041 | 0,66976 | 1,252664439 | 0,00063 | SYN1     | synapsin I                                                                                 |
| 1,00486382  | 0,95126 | 1,313121125 | 0,00117 | SYN1     | synapsin I                                                                                 |
| 1,037419937 | 0,59082 | 1,117287138 | 0,01263 | SYN2     | synapsin II                                                                                |
| 1,076240125 | 0,49044 | 0,828744904 | 0,01258 | SYNC     | syncoilin, intermediate filament protein                                                   |
| 0,704172113 | 0,14286 | 0,74277646  | 0,01721 | SYNCRIP  | synaptotagmin binding, cytoplasmic RNA interacting protein                                 |
| 0,588045625 | 0,17323 | 0,665264521 | 0,00005 | SYNCRIP  | synaptotagmin binding, cytoplasmic RNA interacting protein                                 |
| 0,743806881 | 0,15112 | 0,729510172 | 0,00017 | SYNCRIP  | synaptotagmin binding, cytoplasmic RNA interacting protein                                 |
| 0,813379198 | 0,11614 | 0,802737389 | 0,00194 | SYNCRIP  | synaptotagmin binding, cytoplasmic RNA interacting protein                                 |
| 0,848507902 | 0,10248 | 0,847332435 | 0,00689 | SYNE2    | spectrin repeat containing, nuclear envelope 2                                             |
| 0,665264521 | 0,10099 | 0,713012859 | 0,02874 | SYNE2    | spectrin repeat containing, nuclear envelope 2                                             |
| 1,207480591 | 0,06251 | 1,170398641 | 0,01608 | SYNGAP1  | synaptic Ras GTPase activating protein 1                                                   |
| 0,978063473 | 0,84058 | 1,114966219 | 0,03953 | SYNGR4   | synaptogyrin 4                                                                             |
| 0,931740429 | 0,77011 | 0,795536484 | 0,03497 | SYNJ1    | synaptojanin 1                                                                             |
| 0,841479482 | 0,43054 | 0,655651007 | 0,00028 | SYNJ2    | synaptojanin 2                                                                             |
| 0,818469182 | 0,35261 | 0,817902059 | 0,00853 | SYNJ2BP  | synaptojanin 2 binding protein                                                             |
| 0,847919965 | 0,27901 | 0,81056512  | 0,03363 | SYNJ2BP  | synaptojanin 2 binding protein                                                             |
| 1,382232207 | 0,11478 | 1,332374825 | 0,01291 | SYNPO    | synaptopodin                                                                               |
| 1,076986376 | 0,44623 | 1,165541198 | 0,00366 | SYNPO    | synaptopodin                                                                               |
| 1,129747215 | 0,21746 | 1,192508872 | 0,00087 | SYNPO    | synaptopodin                                                                               |
| 1,190031696 | 0,16783 | 1,241427492 | 0,00383 | SYNPO2L  | synaptopodin 2-like                                                                        |
| 0,754190038 | 0,16688 | 0,89564567  | 0,04139 | SYNRG    | synergin, gamma                                                                            |
| 0,955282936 | 0,69281 | 0,8362464   | 0,01227 | SYNRG    | synergin, gamma                                                                            |
| 0,723467443 | 0,05592 | 0,777007269 | 0,00313 | SYPL1    | synaptophysin-like 1                                                                       |
| 1,198309021 | 0,07078 | 1,297738767 | 0,00068 | SYPL2    | synaptophysin-like 2                                                                       |
| 0,835666959 | 0,05842 | 0,734584317 | 0       | SYSL1    | SYSL1 Golgi-localized integral membrane protein homolog (S. cerevisiae)                    |
| 1,244011653 | 0,07452 | 1,194163187 | 0,00755 | SYT11    | synaptotagmin XI                                                                           |
| 1,097331938 | 0,2808  | 1,111108729 | 0,04808 | SYT12    | synaptotagmin XII                                                                          |
| 1,127400412 | 0,18331 | 1,237990291 | 0,01049 | SYT13    | synaptotagmin XIII                                                                         |
| 0,824162085 | 0,07977 | 0,820172911 | 0,00083 | SYT13    | synaptotagmin XIII                                                                         |
| 1,189207115 | 0,06538 | 1,280759861 | 0,00021 | SYT15    | synaptotagmin XV                                                                           |
| 1,096571589 | 0,44897 | 1,161508732 | 0,04393 | SYT2     | synaptotagmin II                                                                           |
| 1,167967395 | 0,05328 | 1,178539408 | 0,0103  | SYTL2    | synaptotagmin-like 2                                                                       |
| 1,258757174 | 0,27637 | 1,234562607 | 0,02888 | SYTL2    | synaptotagmin-like 2                                                                       |
| 0,988285652 | 0,90945 | 0,866336856 | 0,012   | SYTL4    | synaptotagmin-like 4                                                                       |
| 0,868742185 | 0,42642 | 0,765778999 | 0,00211 | SYTL4    | synaptotagmin-like 4                                                                       |
| 0,980099415 | 0,8283  | 1,140763716 | 0,01804 | SYTL4    | synaptotagmin-like 4                                                                       |
| 0,887611337 | 0,48153 | 1,224336392 | 0,00192 | SZT2     | seizure threshold 2 homolog (mouse)                                                        |
| 1,159899655 | 0,15208 | 1,198309021 | 0,00138 | T        | T, brachyury homolog (mouse)                                                               |
| 1,136029265 | 0,14825 | 1,142346247 | 0,00388 | TAAR3    | trace amine associated receptor 3 (gene/pseudogene)                                        |
| 1,094293701 | 0,16929 | 1,138394029 | 0,00251 | TAAR8    | trace amine associated receptor 8                                                          |
| 0,839149637 | 0,45797 | 0,801625329 | 0,00636 | TAB3     | TGF-beta activated kinase 1/3 binding protein 3                                            |
| 1,0132569   | 0,91441 | 1,117287138 | 0,02373 | TACC1    | transforming, acidic coiled-coil containing protein 1                                      |
| 0,995849753 | 0,96389 | 1,136816973 | 0,00758 | TACC2    | transforming, acidic coiled-coil containing protein 2                                      |
| 0,997922719 | 0,98249 | 1,193335743 | 0,01106 | TACR3    | tachykinin receptor 3                                                                      |
| 1,041743429 | 0,82717 | 0,853817714 | 0,01424 | TADA2B   | transcriptional adaptor 2B                                                                 |
| 0,771640088 | 0,10084 | 0,81056512  | 0,0047  | TAF1     | TAF1 RNA polymerase II, TATA box binding protein (TBP)-associated factor, 250kDa           |
| 0,581157054 | 0,07813 | 0,742261785 | 0,01349 | TAF11    | TAF11 RNA polymerase II, TATA box binding protein (TBP)-associated factor, 28kDa           |
| 0,875988315 | 0,43001 | 0,843815796 | 0,00995 | TAF11    | TAF11 RNA polymerase II, TATA box binding protein (TBP)-associated factor, 28kDa           |
| 0,85797053  | 0,18677 | 0,740206649 | 0,00026 | TAF13    | TAF13 RNA polymerase II, TATA box binding protein (TBP)-associated factor, 18kDa           |
| 1,037419937 | 0,77017 | 1,242288282 | 0,03561 | TAF15    | TAF15 RNA polymerase II, TATA box binding protein (TBP)-associated factor, 68kDa           |
| 0,698823486 | 0,23918 | 0,575544746 | 0,00662 | TAF15    | TAF15 RNA polymerase II, TATA box binding protein (TBP)-associated factor, 68kDa           |
| 0,657927263 | 0,1528  | 0,745872013 | 0,01093 | TAF15    | TAF15 RNA polymerase II, TATA box binding protein (TBP)-associated factor, 68kDa           |
| 0,998614666 | 0,99191 | 0,830470024 | 0,00132 | TAF1B    | TATA box binding protein (TBP)-associated factor, RNA polymerase I, B, 63kDa               |
| 0,722966147 | 0,06521 | 0,737134609 | 0,00153 | TAF1D    | TATA box binding protein (TBP)-associated factor, RNA polymerase I, D, 41kDa               |
| 0,760489377 | 0,20825 | 0,825305409 | 0,00504 | TAF1D    | TATA box binding protein (TBP)-associated factor, RNA polymerase I, D, 41kDa               |
| 1,101141598 | 0,38587 | 1,153485605 | 0,03968 | TAF1L    | TAF1 RNA polymerase II, TATA box binding protein (TBP)-associated factor, 210kDa-like      |
| 0,865736566 | 0,55384 | 0,786762445 | 0,00064 | TAF2     | TAF2 RNA polymerase II, TATA box binding protein (TBP)-associated factor, 150kDa           |

|             |         |             |         |         |                                                                                             |
|-------------|---------|-------------|---------|---------|---------------------------------------------------------------------------------------------|
| 0,96996191  | 0,87858 | 0,843815796 | 0,01636 | TAF4    | TAF4 RNA polymerase II, TATA box binding protein (TBP)-associated factor, 135kDa            |
| 0,941478465 | 0,6254  | 1,121166078 | 0,01855 | TAF4B   | TAF4b RNA polymerase II, TATA box binding protein (TBP)-associated factor, 105kDa           |
| 0,958599438 | 0,8422  | 0,802737389 | 0,00649 | TAF4B   | TAF4b RNA polymerase II, TATA box binding protein (TBP)-associated factor, 105kDa           |
| 0,97874165  | 0,8953  | 0,857376037 | 0,01925 | TAF5    | TAF5 RNA polymerase II, TATA box binding protein (TBP)-associated factor, 100kDa            |
| 1,163926534 | 0,13234 | 1,127400412 | 0,01818 | TAF6L   | TAF6-like RNA polymerase II, p300/CBP-associated factor (PCAF)-associated factor, 65kDa     |
| 0,992404375 | 0,95377 | 0,873572896 | 0,03922 | TAF7    | TAF7 RNA polymerase II, TATA box binding protein (TBP)-associated factor, 55kDa             |
| 0,877213549 | 0,0774  | 0,898755127 | 0,02557 | TAF7L   | TAF7-like RNA polymerase II, TATA box binding protein (TBP)-associated factor, 50kDa        |
| 1,190856849 | 0,1311  | 1,280759861 | 0,00905 | TAF9B   | TAF9B RNA polymerase II, TATA box binding protein (TBP)-associated factor, 31kDa            |
| 0,748980467 | 0,16437 | 0,747424624 | 0,00036 | TAF9B   | TAF9B RNA polymerase II, TATA box binding protein (TBP)-associated factor, 31kDa            |
| 1,603250659 | 0,09838 | 1,937236378 | 0,00004 | TAGLN   | transgelin                                                                                  |
| 1,868654694 | 0,06668 | 2,177994031 | 0,00015 | TAGLN   | transgelin                                                                                  |
| 1,057018041 | 0,57241 | 1,174461971 | 0,01017 | TAL1    | T-cell acute lymphocytic leukemia 1                                                         |
| 0,923382311 | 0,5043  | 0,866937564 | 0,02358 | TAMM41  | TAM41, mitochondrial translocator assembly and maintenance protein, homolog (S. cerevisiae) |
| 1,032398535 | 0,8095  | 1,194163187 | 0,01223 | TAMM41  | TAM41, mitochondrial translocator assembly and maintenance protein, homolog (S. cerevisiae) |
| 0,754712984 | 0,24907 | 0,770037174 | 0,00342 | TANC1   | tetratricopeptide repeat, ankyrin repeat and coiled-coil containing 1                       |
| 0,869947353 | 0,48225 | 0,826450318 | 0,0043  | TANC2   | tetratricopeptide repeat, ankyrin repeat and coiled-coil containing 2                       |
| 0,877821798 | 0,56813 | 0,79940583  | 0,0464  | TANK    | TRAF family member-associated NFKB activator                                                |
| 0,611744021 | 0,0679  | 0,711531731 | 0,02915 | TANK    | TRAF family member-associated NFKB activator                                                |
| 0,765778999 | 0,16684 | 0,754190038 | 0,00572 | TAKO1   | TAO kinase 1                                                                                |
| 1,061423209 | 0,89008 | 0,821880187 | 0,00879 | TAKO1   | TAO kinase 1                                                                                |
| 0,679243142 | 0,16421 | 0,579547976 | 0,00003 | TAKO1   | TAO kinase 1                                                                                |
| 0,828170661 | 0,35466 | 0,688725023 | 0,00337 | TAKO1   | TAO kinase 1                                                                                |
| 1,23370717  | 0,193   | 1,365093718 | 0,00849 | TAKO2   | TAO kinase 2                                                                                |
| 0,985549337 | 0,93875 | 0,855590526 | 0,01102 | TAP2    | transporter 2, ATP-binding cassette, sub-family B (MDR/TAP)                                 |
| 1,062159186 | 0,76572 | 1,332374825 | 0,02629 | TAPBP   | TAP binding protein (tapasin)                                                               |
| 1,136029265 | 0,72688 | 1,572434584 | 0,00021 | TAPBP   | TAP binding protein (tapasin)                                                               |
| 1,034547582 | 0,72991 | 0,863938187 | 0,01409 | TAPT1   | transmembrane anterior posterior transformation 1                                           |
| 0,890075733 | 0,40274 | 0,8962667   | 0,04671 | TARBP1  | TAR (HIV-1) RNA binding protein 1                                                           |
| 1,038139271 | 0,53821 | 1,085981856 | 0,03803 | TAS1R1  | taste receptor, type 1, member 1                                                            |
| 1,100378609 | 0,3118  | 1,163120042 | 0,00763 | TAS1R1  | taste receptor, type 1, member 1                                                            |
| 1,069547088 | 0,42866 | 1,128182137 | 0,02067 | TAS1R2  | taste receptor, type 1, member 2                                                            |
| 1,095052471 | 0,18634 | 1,10343374  | 0,03392 | TAS2R14 | taste receptor, type 2, member 14                                                           |
| 1,087488391 | 0,43019 | 1,151089491 | 0,01572 | TAS2R38 | taste receptor, type 2, member 38                                                           |
| 1,068805991 | 0,69126 | 0,76950361  | 0,00081 | TASP1   | taspace, threonine aspartase, 1                                                             |
| 0,733058379 | 0,07343 | 0,778624691 | 0,00158 | TAX1BP1 | Tax1 (human T-cell leukemia virus type I) binding protein 1                                 |
| 0,844400887 | 0,48758 | 0,758909626 | 0,01564 | TAX1BP1 | Tax1 (human T-cell leukemia virus type I) binding protein 1                                 |
| 1,025978145 | 0,86927 | 1,25353302  | 0,01237 | TAZ     | tafazzin                                                                                    |
| 1,133669413 | 0,23615 | 1,284315809 | 0,00031 | TAZ     | tafazzin                                                                                    |
| 1,190856849 | 0,11605 | 1,188383105 | 0,02255 | TBC1D13 | TBC1 domain family, member 13                                                               |
| 1,080725402 | 0,43254 | 1,25092908  | 0,00028 | TBC1D16 | TBC1 domain family, member 16                                                               |
| 0,802181166 | 0,28657 | 0,757333158 | 0,00257 | TBC1D23 | TBC1 domain family, member 23                                                               |
| 1,112650121 | 0,46986 | 1,29056249  | 0,00217 | TBC1D25 | TBC1 domain family, member 25                                                               |
| 1,190856849 | 0,10376 | 1,146312186 | 0,0049  | TBC1D25 | TBC1 domain family, member 25                                                               |
| 1,20664392  | 0,07805 | 1,190856849 | 0,00861 | TBC1D27 | TBC1 domain family, member 27                                                               |
| 0,904379378 | 0,63062 | 1,183451022 | 0,01044 | TBC1D28 | TBC1 domain family, member 28                                                               |
| 1,091263877 | 0,20328 | 1,121943481 | 0,01988 | TBC1D28 | TBC1 domain family, member 28                                                               |
| 1,193335743 | 0,0931  | 1,155886707 | 0,02525 | TBC1D28 | TBC1 domain family, member 28                                                               |
| 1,122721422 | 0,08427 | 1,121943481 | 0,0227  | TBC1D30 | TBC1 domain family, member 30                                                               |
| 1,121943481 | 0,18595 | 1,087488391 | 0,0432  | TBC1D30 | TBC1 domain family, member 30                                                               |
| 1,082224645 | 0,30032 | 1,110338834 | 0,0385  | TBC1D7  | TBC1 domain family, member 7                                                                |
| 0,912565489 | 0,56286 | 0,852634892 | 0,04216 | TBC1D8  | TBC1 domain family, member 8 (with GRAM domain)                                             |
| 1,156688184 | 0,06127 | 1,151089491 | 0,02211 | TBC1D8B | TBC1 domain family, member 8B (with GRAM domain)                                            |
| 0,832775771 | 0,05388 | 0,774319028 | 0,00004 | TBCA    | tubulin folding cofactor A                                                                  |
| 1,035264924 | 0,81505 | 1,184271612 | 0,01384 | TBCD    | tubulin folding cofactor D                                                                  |
| 0,950659101 | 0,72608 | 0,86154616  | 0,02033 | TBK1    | TANK-binding kinase 1                                                                       |
| 1,088997015 | 0,25857 | 1,116512962 | 0,03076 | TBL1X   | transducin (beta)-like 1X-linked                                                            |
| 0,669891801 | 0,06513 | 0,864537231 | 0,01081 | TBL1X   | transducin (beta)-like 1X-linked                                                            |
| 1,062895674 | 0,7761  | 0,782954296 | 0,00873 | TBL1XR1 | transducin (beta)-like 1 X-linked receptor 1                                                |
| 1,127400412 | 0,29932 | 1,113421618 | 0,01579 | TBL2    | transducin (beta)-like 2                                                                    |
| 0,993781093 | 0,96183 | 1,157490217 | 0,00069 | TBRG1   | transforming growth factor beta regulator 1                                                 |
| 0,943438251 | 0,46292 | 1,29056249  | 0,00054 | TBX18   | T-box 18                                                                                    |
| 1,143138335 | 0,19776 | 1,127400412 | 0,02337 | TBX5    | T-box 5                                                                                     |
| 1,096571589 | 0,24077 | 1,117287138 | 0,0262  | TBX5    | T-box 5                                                                                     |
| 1,412254404 | 0,0571  | 1,456999114 | 0,00008 | TBXAS1  | thromboxane A synthase 1 (platelet)                                                         |
| 0,910669834 | 0,70713 | 0,822450069 | 0,00933 | TCCN2   | tandem C2 domains, nuclear                                                                  |
| 0,936921447 | 0,62948 | 0,890692901 | 0,00785 | TCEA1   | transcription elongation factor A (SII), 1                                                  |
| 1,032398535 | 0,70919 | 1,155085785 | 0,00632 | TCEA3   | transcription elongation factor A (SII), 3                                                  |
| 1,180174343 | 0,11723 | 1,244874235 | 0,00095 | TCEAL3  | transcription elongation factor A (SII)-like 3                                              |
| 1,046810282 | 0,59986 | 1,104198847 | 0,04121 | TCEANC  | transcription elongation factor A (SII) N-terminal and central domain containing            |
| 1,086734863 | 0,44284 | 1,340712592 | 0,00003 | TCEANC2 | transcription elongation factor A (SII) N-terminal and central domain containing 2          |
| 1,058484395 | 0,73622 | 0,794985251 | 0,01948 | TCEB1   | transcription elongation factor B (SIII), polypeptide 1 (15kDa, elongin C)                  |
| 1,00765376  | 0,93282 | 1,106497353 | 0,01977 | TCEB3   | transcription elongation factor B (SIII), polypeptide 3 (110kDa, elongin A)                 |
| 1,121166078 | 0,23968 | 1,121166078 | 0,04489 | TCEB3   | transcription elongation factor B (SIII), polypeptide 3 (110kDa, elongin A)                 |
| 0,778624691 | 0,10015 | 0,884540435 | 0,01174 | TCEB3   | transcription elongation factor B (SIII), polypeptide 3 (110kDa, elongin A)                 |
| 0,839149637 | 0,34988 | 0,787853886 | 0,01927 | TCERG1  | transcription elongation regulator 1                                                        |
| 0,878430468 | 0,37037 | 0,815072332 | 0,02397 | TCF12   | transcription factor 12                                                                     |
| 0,875998315 | 0,28535 | 0,863938187 | 0,01036 | TCF19   | transcription factor 19                                                                     |
| 0,868140228 | 0,11647 | 0,827023368 | 0,01448 | TCF20   | transcription factor 20 (AR1)                                                               |
| 1,034547582 | 0,69331 | 1,115739322 | 0,02    | TCF20   | transcription factor 20 (AR1)                                                               |
| 1,087488391 | 0,49488 | 1,134455485 | 0,01599 | TCF20   | transcription factor 20 (AR1)                                                               |
| 1,091263877 | 0,2316  | 1,158292806 | 0,0062  | TCF25   | transcription factor 25 (basic helix-loop-helix)                                            |
| 1,20163605  | 0,05506 | 1,277213759 | 0,00986 | TCF3    | transcription factor 3 (E2A immunoglobulin enhancer binding factors E12/E47)                |
| 1,657489809 | 0,08128 | 1,254402205 | 0,02384 | TCF4    | transcription factor 4                                                                      |
| 1,726679117 | 0,06449 | 1,340712592 | 0,00322 | TCF4    | transcription factor 4                                                                      |
| 1,289668251 | 0,42363 | 1,494849249 | 0,00026 | TCF4    | transcription factor 4                                                                      |
| 1,071773463 | 0,55911 | 1,161508732 | 0,00719 | TCF7    | transcription factor 7 (T-cell specific, HMG-box)                                           |
| 0,994470169 | 0,97341 | 0,733058379 | 0,0004  | TCFL5   | transcription factor-like 5 (basic helix-loop-helix)                                        |
| 0,782411782 | 0,11884 | 0,849684999 | 0,00392 | TCHP    | trichoplein, keratin filament binding                                                       |
| 1,409320755 | 0,1257  | 1,574615953 | 0,00007 | TCIRG1  | T-cell, immune regulator 1, ATPase, H+ transporting, lysosomal V0 subunit A3                |
| 1,261377409 | 0,05946 | 1,265756594 | 0,0039  | TCL1A   | T-cell leukemia/lymphoma 1A                                                                 |
| 1,00695555  | 0,94708 | 1,119612889 | 0,04105 | TCL1B   | T-cell leukemia/lymphoma 1B                                                                 |
| 0,976031761 | 0,76988 | 1,151887642 | 0,03918 | TCL6    | T-cell leukemia/lymphoma 6 (non-protein coding)                                             |
| 1,085229372 | 0,32781 | 1,154285418 | 0,01603 | TCL6    | T-cell leukemia/lymphoma 6 (non-protein coding)                                             |
| 0,660211421 | 0,05692 | 0,798298386 | 0,00036 | TCP1    | t-complex 1                                                                                 |
| 1,059218335 | 0,63415 | 1,149494848 | 0,006   | TCP11L1 | t-complex 11 (mouse)-like 1                                                                 |
| 0,870550563 | 0,16427 | 0,742261785 | 0,0052  | TCP11L2 | t-complex 11 (mouse)-like 2                                                                 |
| 0,968618189 | 0,8051  | 1,142346247 | 0,04038 | TCTA    | T-cell leukemia translocation altered gene                                                  |
| 0,957271458 | 0,54991 | 1,134455485 | 0,04123 | TCTE1   | t-complex-associated-testis-expressed 1                                                     |
| 1,230291345 | 0,22127 | 1,207480591 | 0,02466 | TCTE3   | t-complex-associated-testis-expressed 3                                                     |
| 1,170398641 | 0,09999 | 1,129747215 | 0,01834 | TCTE3   | t-complex-associated-testis-expressed 3                                                     |
| 0,836826243 | 0,15098 | 0,745872013 | 0,00202 | TCTE3   | t-complex-associated-testis-expressed 3                                                     |
| 1,050444544 | 0,52977 | 1,074004472 | 0,04131 | TCTE3   | t-complex-associated-testis-expressed 3                                                     |
| 1,131314463 | 0,19552 | 1,227735684 | 0,00042 | TCTN1   | tectonic family member 1                                                                    |
| 1,105730653 | 0,17204 | 1,173648178 | 0,00036 | TCTN1   | tectonic family member 1                                                                    |

|             |         |             |         |         |                                                                                                    |
|-------------|---------|-------------|---------|---------|----------------------------------------------------------------------------------------------------|
| 1,062895674 | 0,54708 | 1,083725967 | 0,02829 | TCTN2   | tectonic family member 2                                                                           |
| 1,202469249 | 0,32884 | 1,224336392 | 0,00196 | TCTN3   | tectonic family member 3                                                                           |
| 0,705637922 | 0,06108 | 0,776468875 | 0,00304 | TDG     | thymine-DNA glycosylase                                                                            |
| 0,741747467 | 0,06296 | 0,777546036 | 0,00036 | TDG     | thymine-DNA glycosylase                                                                            |
| 1,130530567 | 0,13345 | 1,096571589 | 0,03721 | TD02    | tryptophan 2,3-dioxygenase                                                                         |
| 0,71946679  | 0,1157  | 0,701735863 | 0,00033 | TDP2    | tyrosyl-DNA phosphodiesterase 2                                                                    |
| 1,192508872 | 0,06281 | 1,168777249 | 0,00227 | TDRG1   | testis development related protein 1                                                               |
| 1,289668251 | 0,08578 | 1,43097652  | 0,00003 | TEAD2   | TEA domain family member 2                                                                         |
| 1,033830736 | 0,74662 | 1,192508872 | 0,02525 | TEAD2   | TEA domain family member 2                                                                         |
| 1,117287138 | 0,47354 | 1,32408891  | 0,00074 | TEAD2   | TEA domain family member 2                                                                         |
| 1,080725402 | 0,58669 | 1,247465572 | 0,0096  | TECPR1  | tectonin beta-propeller repeat containing 1                                                        |
| 1,07549439  | 0,41916 | 1,174461971 | 0,03204 | TECPR1  | tectonin beta-propeller repeat containing 1                                                        |
| 1,022428531 | 0,82145 | 0,934327347 | 0,04224 | TECRL   | trans-2,3-enoyl-CoA reductase-like                                                                 |
| 1,086734863 | 0,47761 | 1,097331938 | 0,03136 | TECTB   | tectorin beta                                                                                      |
| 1,246601194 | 0,33543 | 1,350037985 | 0,00647 | TENC1   | tensin like C1 domain containing phosphatase (tensin 2)                                            |
| 1,070288698 | 0,59617 | 1,217566019 | 0,00093 | TEPP    | testis, prostate and placenta expressed                                                            |
| 0,804966138 | 0,06571 | 0,81056512  | 0,02202 | TERF1   | telomeric repeat binding factor (NIMA-interacting) 1                                               |
| 0,877213549 | 0,39533 | 0,827023368 | 0,00047 | TERF1   | telomeric repeat binding factor (NIMA-interacting) 1                                               |
| 1,059218335 | 0,62897 | 1,328685814 | 0,00092 | TESC    | tescalcin                                                                                          |
| 0,655651007 | 0,07924 | 0,689680461 | 0,00014 | TET2    | tet oncogene family member 2                                                                       |
| 1,062159186 | 0,52693 | 1,142346247 | 0,01479 | TET3    | tet oncogene family member 3                                                                       |
| 1,016070143 | 0,82524 | 1,139973273 | 0,0447  | TEX15   | testis expressed 15                                                                                |
| 1,113421618 | 0,35508 | 1,204972315 | 0,00082 | TEX28   | testis expressed 28                                                                                |
| 0,751580739 | 0,21755 | 0,741747467 | 0,00134 | TFAM    | transcription factor A, mitochondrial                                                              |
| 1,004167543 | 0,98298 | 0,793883931 | 0,01214 | TFAM    | transcription factor A, mitochondrial                                                              |
| 1,087488391 | 0,25901 | 1,158292806 | 0,02617 | TFAP2B  | transcription factor AP-2 beta (activating enhancer binding protein 2 beta)                        |
| 0,816768991 | 0,07699 | 0,868140228 | 0,00558 | TFB1M   | transcription factor B1, mitochondrial                                                             |
| 0,85797053  | 0,31719 | 0,77271055  | 0,00023 | TFB2M   | transcription factor B2, mitochondrial                                                             |
| 0,891310496 | 0,27377 | 0,760489377 | 0,00224 | TFCP2L1 | transcription factor CP2-like 1                                                                    |
| 0,767905135 | 0,15278 | 0,820172911 | 0,03862 | TFDP1   | transcription factor Dp-1                                                                          |
| 1,095811766 | 0,5245  | 0,792784137 | 0,01129 | TFDP1   | transcription factor Dp-1                                                                          |
| 1,104198847 | 0,38582 | 0,821310701 | 0,00489 | TFDP1   | transcription factor Dp-1                                                                          |
| 1,195819797 | 0,09788 | 1,20163605  | 0,0126  | TFEB    | transcription factor EB                                                                            |
| 1,04068494  | 0,55593 | 1,175276328 | 0,03614 | TFE3    | trefoil factor 3 (intestinal)                                                                      |
| 0,906890329 | 0,71517 | 0,692554734 | 0,00074 | TFG     | TRK-fused gene                                                                                     |
| 0,950659101 | 0,83331 | 0,752623374 | 0,00383 | TFG     | TRK-fused gene                                                                                     |
| 1,296839555 | 0,2019  | 1,312211255 | 0,01572 | TFPI    | tissue factor pathway inhibitor (lipoprotein-associated coagulation inhibitor)                     |
| 1,070288698 | 0,45504 | 1,162314108 | 0,02467 | TFPT    | TCF3 (E2A) fusion partner (in childhood Leukemia)                                                  |
| 0,928516852 | 0,39836 | 0,878430468 | 0,01226 | TFR2    | transferrin receptor 2                                                                             |
| 1,126619228 | 0,35838 | 1,2397077   | 0,0026  | TG      | thyroglobulin                                                                                      |
| 1,387030969 | 0,36602 | 1,433955248 | 0,00449 | TGFB1   | transforming growth factor, beta 1                                                                 |
| 1,122721422 | 0,27947 | 1,210833084 | 0,03079 | TGFB2   | transforming growth factor, beta 2                                                                 |
| 1,162314108 | 0,17703 | 1,306765254 | 0,04157 | TGFBR1  | transforming growth factor, beta receptor 1                                                        |
| 0,730522189 | 0,11028 | 0,780786493 | 0,01401 | TGFBR1  | transforming growth factor, beta receptor 1                                                        |
| 1,043911927 | 0,74401 | 1,312211255 | 0,04926 | TGFBR2  | transforming growth factor, beta receptor II (70/80kDa)                                            |
| 1,192508872 | 0,07236 | 1,147107024 | 0,04022 | TGIF2   | TGFB-induced factor homeobox 2                                                                     |
| 1,193335743 | 1,14008 | 1,204972315 | 0,00054 | TGM2    | transglutaminase 2 (C polypeptide, protein-glutamine-gamma-glutamyltransferase)                    |
| 1,2397077   | 0,06807 | 1,189207115 | 0,02604 | TGM2    | transglutaminase 2 (C polypeptide, protein-glutamine-gamma-glutamyltransferase)                    |
| 1,258757174 | 0,09533 | 1,255271991 | 0,00228 | TGOLN2  | trans-golgi network protein 2                                                                      |
| 0,662503509 | 0,1057  | 0,874784765 | 0,01637 | TH1L    | TH1-like (Drosophila)                                                                              |
| 0,7031966   | 0,14202 | 0,889458994 | 0,04176 | TH1L    | TH1-like (Drosophila)                                                                              |
| 0,998614666 | 0,99407 | 0,85797053  | 0,01696 | THADA   | thyroid adenoma associated                                                                         |
| 0,963929808 | 0,68551 | 0,817335328 | 0,00088 | THAP11  | THAP domain containing 11                                                                          |
| 0,635515845 | 0,0536  | 0,579949827 | 0,00011 | THAP2   | THAP domain containing, apoptosis associated protein 2                                             |
| 0,7031966   | 0,05947 | 0,745872013 | 0,01318 | THBD    | thrombospondin                                                                                     |
| 1,142346247 | 0,23478 | 1,349102534 | 0,01296 | THBS1   | thrombospondin 1                                                                                   |
| 1,00486382  | 0,95782 | 1,180992661 | 0,00357 | THBS3   | thrombospondin 3                                                                                   |
| 1,108032348 | 0,33868 | 1,131314463 | 0,04452 | THNSL2  | threonine synthase-like 2 (S. cerevisiae)                                                          |
| 0,645728675 | 0,07549 | 0,751059963 | 0,00007 | THOC2   | THO complex 2                                                                                      |
| 0,650220073 | 0,21617 | 0,781869643 | 0,00181 | THOC2   | THO complex 2                                                                                      |
| 0,712025098 | 0,22712 | 0,81056512  | 0,00092 | THOC2   | THO complex 2                                                                                      |
| 0,919550046 | 0,62155 | 0,816203046 | 0,01152 | THOC2   | THO complex 2                                                                                      |
| 0,706616822 | 0,45274 | 0,710546022 | 0,03893 | THOC4   | THO complex 4                                                                                      |
| 0,699308041 | 0,14146 | 0,723467443 | 0,00722 | THOC4   | THO complex 4                                                                                      |
| 0,751580739 | 0,06911 | 0,804408371 | 0,00159 | THOC7   | THO complex 7 homolog (Drosophila)                                                                 |
| 0,868742185 | 0,37834 | 0,786762445 | 0,03829 | THOC7   | THO complex 7 homolog (Drosophila)                                                                 |
| 1,017479692 | 0,8701  | 1,194163187 | 0,0252  | THRA    | thyroid hormone receptor, alpha                                                                    |
| 0,661127303 | 0,17454 | 0,786762445 | 0,00139 | THRAP3  | thyroid hormone receptor associated protein 3                                                      |
| 0,756808396 | 0,24381 | 0,733058379 | 0,00069 | THRB    | thyroid hormone receptor, beta (erythroblastic leukemia viral (v-erb-a) oncogene homolog 2, avian) |
| 0,87175824  | 0,56429 | 0,848507902 | 0,02698 | THRR    | thyroid hormone receptor, beta (erythroblastic leukemia viral (v-erb-a) oncogene homolog 2, avian) |
| 0,961927455 | 0,73397 | 1,108032348 | 0,02232 | THRSP   | thyroid hormone responsive                                                                         |
| 1,297738767 | 0,23066 | 1,344434994 | 0,0049  | THSD7A  | thrombospondin, type I, domain containing 7A                                                       |
| 0,875998315 | 0,52356 | 0,839149637 | 0,01057 | THSD7B  | thrombospondin, type I, domain containing 7B                                                       |
| 1,066585781 | 0,55155 | 1,25092908  | 0,0039  | THTPA   | thiamine triphosphatase                                                                            |
| 0,947370071 | 0,85395 | 0,791137301 | 0,0006  | THUMPD1 | THUMP domain containing 1                                                                          |
| 0,863938187 | 0,56281 | 0,823591017 | 0,00862 | THUMPD1 | THUMP domain containing 1                                                                          |
| 0,810003474 | 0,0948  | 0,817902059 | 0,00075 | THUMPD2 | THUMP domain containing 2                                                                          |
| 0,803850991 | 0,22013 | 0,739693755 | 0,00017 | THUMPD3 | THUMP domain containing 3                                                                          |
| 1,223488041 | 0,50061 | 1,623379162 | 0,00032 | THY1    | Thy-1 cell surface antigen                                                                         |
| 1,114193651 | 0,59326 | 1,566994374 | 0,00139 | THY1    | Thy-1 cell surface antigen                                                                         |
| 1,295940965 | 0,0851  | 1,461044379 | 0,00065 | THY1    | Thy-1 cell surface antigen                                                                         |
| 0,771105413 | 0,05477 | 0,837987135 | 0,00863 | TIA1    | TIA1 cytotoxic granule-associated RNA binding protein                                              |
| 1,043911927 | 0,61552 | 1,082224645 | 0,04671 | TIAF1   | TGFB1-induced anti-apoptotic factor 1                                                              |
| 1,340712592 | 0,20786 | 1,817556233 | 0,00106 | TIE1    | tyrosine kinase with immunoglobulin-like and EGF-like domains 1                                    |
| 1,188383105 | 0,06815 | 1,125058485 | 0,03802 | TIFAB   | TRAF-interacting protein with forkhead-associated domain, family member B                          |
| 0,844400887 | 0,07282 | 0,729510172 | 0,00103 | TIGD1   | tigger transposable element derived 1                                                              |
| 0,921464186 | 0,73044 | 0,737645729 | 0,00288 | TIGD2   | tigger transposable element derived 2                                                              |
| 1,071030823 | 0,45702 | 1,156688184 | 0,01759 | TIGD7   | tigger transposable element derived 7                                                              |
| 0,655651007 | 0,08565 | 0,816768991 | 0,01612 | TIMM17A | translocase of inner mitochondrial membrane 17 homolog A (yeast)                                   |
| 0,883315051 | 0,37005 | 0,862741345 | 0,0023  | TIMM17A | translocase of inner mitochondrial membrane 17 homolog A (yeast)                                   |
| 0,966606097 | 0,73419 | 1,182631    | 0,00468 | TIMM17B | translocase of inner mitochondrial membrane 17 homolog B (yeast)                                   |
| 1,194991205 | 0,25837 | 1,265756594 | 0,00699 | TIMM17B | translocase of inner mitochondrial membrane 17 homolog B (yeast)                                   |
| 0,992404375 | 0,92425 | 1,126619228 | 0,04242 | TIMM22  | translocase of inner mitochondrial membrane 22 homolog (yeast)                                     |
| 0,862143545 | 0,18801 | 0,86934456  | 0,00983 | TIMM23  | translocase of inner mitochondrial membrane 23 homolog (yeast)                                     |
| 0,937571096 | 0,53553 | 0,79940583  | 0,00031 | TIMM8A  | translocase of inner mitochondrial membrane 8 homolog A (yeast)                                    |
| 0,78132788  | 0,06898 | 0,851453708 | 0,02185 | TIMM8B  | translocase of inner mitochondrial membrane 8 homolog B (yeast)                                    |
| 0,789493887 | 0,11847 | 0,899378312 | 0,01579 | TIMMDC1 | translocase of inner mitochondrial membrane domain containing 1                                    |
| 1,062895674 | 0,8424  | 1,682958965 | 0,00005 | TIMP1   | TIMP metalloproteinase inhibitor 1                                                                 |
| 1,473247686 | 0,05618 | 1,509425969 | 0,00003 | TIMP2   | TIMP metalloproteinase inhibitor 2                                                                 |
| 1,125058485 | 0,45368 | 1,227735684 | 0,03475 | TIMP2   | TIMP metalloproteinase inhibitor 2                                                                 |
| 0,757858283 | 0,23058 | 0,647072827 | 0,00421 | TIPARP  | TCDD-inducible poly(ADP-ribose) polymerase                                                         |
| 0,847332435 | 0,41294 | 0,708578698 | 0,01147 | TIPRL   | TIP41, TOR signaling pathway regulator-like (S. cerevisiae)                                        |
| 0,837987135 | 0,50152 | 0,745355193 | 0,03035 | TIPRL   | TIP41, TOR signaling pathway regulator-like (S. cerevisiae)                                        |
| 0,815072332 | 0,36873 | 0,716480825 | 0,00368 | TIPRL   | TIP41, TOR signaling pathway regulator-like (S. cerevisiae)                                        |

|             |         |             |         |          |                                                                     |
|-------------|---------|-------------|---------|----------|---------------------------------------------------------------------|
| 0,934327347 | 0,44426 | 1,135242102 | 0,01809 | TIRAP    | toil-interleukin 1 receptor (TIR) domain containing adaptor protein |
| 1,199971382 | 0,0915  | 1,330529041 | 0,00072 | TIRAP    | toil-interleukin 1 receptor (TIR) domain containing adaptor protein |
| 1,115739322 | 0,36241 | 1,171210181 | 0,01042 | TJAP1    | tight junction associated protein 1 (peripheral)                    |
| 0,690637224 | 0,13566 | 0,742261785 | 0,00024 | TJP1     | tight junction protein 1 (zona occludens 1)                         |
| 1,176906737 | 0,14191 | 1,267512522 | 0,00159 | TJP3     | tight junction protein 3 (zona occludens 3)                         |
| 1,082224645 | 0,47466 | 1,143930973 | 0,02022 | TK2      | thymidine kinase 2, mitochondrial                                   |
| 1,168777249 | 0,21641 | 1,379360922 | 0,00024 | TK2      | thymidine kinase 2, mitochondrial                                   |
| 0,585605091 | 0,07077 | 0,815072332 | 0,02135 | TKT      | transketolase                                                       |
| 1,106497353 | 0,31075 | 1,142346247 | 0,01713 | TKTL1    | transketolase-like 1                                                |
| 0,849684999 | 0,18293 | 0,778624691 | 0,01468 | TLE1     | transducin-like enhancer of split 1 (E(sp1) homolog, Drosophila)    |
| 0,76630998  | 0,05006 | 0,763658749 | 0,01907 | TLE1     | transducin-like enhancer of split 1 (E(sp1) homolog, Drosophila)    |
| 0,948026965 | 0,79124 | 0,851453708 | 0,00642 | TLE4     | transducin-like enhancer of split 4 (E(sp1) homolog, Drosophila)    |
| 1,065108203 | 0,61807 | 0,901875378 | 0,02119 | TLE4     | transducin-like enhancer of split 4 (E(sp1) homolog, Drosophila)    |
| 0,859756486 | 0,2829  | 0,778085177 | 0,00603 | TLE4     | transducin-like enhancer of split 4 (E(sp1) homolog, Drosophila)    |
| 1,172834949 | 0,06699 | 1,114193651 | 0,02211 | TLE6     | transducin-like enhancer of split 6 (E(sp1) homolog, Drosophila)    |
| 0,85086373  | 0,43646 | 0,833931044 | 0,00479 | TLK1     | tousled-like kinase 1                                               |
| 0,955282936 | 0,5342  | 0,8962667   | 0,00944 | TLK1     | tousled-like kinase 1                                               |
| 1,22010051  | 0,12203 | 1,17609125  | 0,02303 | TLL2     | tolloid-like 2                                                      |
| 0,917639882 | 0,66437 | 0,802737389 | 0,03567 | TLR3     | toil-like receptor 3                                                |
| 1,172834949 | 0,05199 | 1,237132479 | 0,00064 | TLR6     | toil-like receptor 6                                                |
| 1,000693387 | 0,99715 | 1,240567298 | 0,02434 | TLR6     | toil-like receptor 6                                                |
| 1,071773463 | 0,49212 | 1,132883885 | 0,01932 | TLR7     | toil-like receptor 7                                                |
| 1,192508872 | 0,124   | 1,197478705 | 0,00393 | TLR8     | toil-like receptor 8                                                |
| 0,862741345 | 0,08496 | 0,879039561 | 0,00535 | TM2D2    | TM2 domain containing 2                                             |
| 0,803850991 | 0,14955 | 0,71946679  | 0,00052 | TM2D3    | TM2 domain containing 3                                             |
| 0,793883931 | 0,05856 | 0,845572287 | 0,00171 | TM2D3    | TM2 domain containing 3                                             |
| 1,341642225 | 0,2495  | 1,31494276  | 0,02173 | TM4SF18  | transmembrane 4 L six family member 18                              |
| 1,142346247 | 0,16176 | 1,135242102 | 0,04661 | TM4SF4   | transmembrane 4 L six family member 4                               |
| 1,092777739 | 0,30343 | 1,271031689 | 0,00106 | TM4SF5   | transmembrane 4 L six family member 5                               |
| 1,180992661 | 0,14316 | 1,153485605 | 0,00688 | TM6SF2   | transmembrane 6 superfamily member 2                                |
| 0,711038705 | 0,10197 | 0,754190038 | 0,00105 | TM7SF3   | transmembrane 7 superfamily member 3                                |
| 1,234562607 | 0,1893  | 1,193335743 | 0,00682 | TM9SF1   | transmembrane 9 superfamily member 1                                |
| 0,748980467 | 0,05442 | 0,813943185 | 0,00022 | TM9SF3   | transmembrane 9 superfamily member 3                                |
| 0,804408371 | 0,20426 | 0,836826243 | 0,00992 | TM9SF3   | transmembrane 9 superfamily member 3                                |
| 1,160703914 | 0,0864  | 1,210833084 | 0,00169 | TM9SF3   | transmembrane 9 superfamily member 3                                |
| 1,209994089 | 0,27036 | 1,263127262 | 0,00432 | TM9SF4   | transmembrane 9 superfamily member 4                                |
| 0,774855931 | 0,21203 | 0,830470024 | 0,00358 | TMBIM4   | transmembrane BAX inhibitor motif containing 4                      |
| 1,009051634 | 0,96026 | 1,274560627 | 0,00093 | TMBIM6   | transmembrane BAX inhibitor motif containing 6                      |
| 1,095811766 | 0,41221 | 1,151089491 | 0,01038 | TMC2     | transmembrane channel-like 2                                        |
| 1,081474763 | 0,71481 | 1,240567298 | 0,00797 | TMC6     | transmembrane channel-like 6                                        |
| 1,478362431 | 0,09327 | 1,541142217 | 0,00318 | TMC8     | transmembrane channel-like 8                                        |
| 0,954621014 | 0,66607 | 0,834509281 | 0,02544 | TMCC1    | transmembrane and coiled-coil domain family 1                       |
| 0,745872013 | 0,06027 | 0,799960128 | 0,00424 | TMCC1    | transmembrane and coiled-coil domain family 1                       |
| 0,817902059 | 0,4551  | 0,756808396 | 0,00731 | TMCC1    | transmembrane and coiled-coil domain family 1                       |
| 0,869947353 | 0,57982 | 0,772175133 | 0,01812 | TMCC3    | transmembrane and coiled-coil domain family 3                       |
| 1,090507733 | 0,30364 | 1,119612889 | 0,00723 | TMCO2    | transmembrane and coiled-coil domains 2                             |
| 1,235418637 | 0,06813 | 1,268391399 | 0,0014  | TMCO4    | transmembrane and coiled-coil domains 4                             |
| 1,151089491 | 0,25303 | 1,271031689 | 0,00115 | TMCO4    | transmembrane and coiled-coil domains 4                             |
| 1,065846736 | 0,43156 | 1,136816973 | 0,0087  | TMCO5B   | transmembrane and coiled-coil domains 5B, pseudogene                |
| 1,137605228 | 0,18047 | 1,114193651 | 0,03121 | TMCO7    | transmembrane and coiled-coil domains 7                             |
| 1,064370182 | 0,50224 | 1,104198847 | 0,04954 | TMED4    | transmembrane emp24 protein transport domain containing 4           |
| 0,898755127 | 0,27055 | 0,800514811 | 0,00126 | TMED4    | transmembrane emp24 protein transport domain containing 4           |
| 0,822450069 | 0,34822 | 0,856188285 | 0,02875 | TMED8    | transmembrane emp24 protein transport domain containing 8           |
| 1,185914499 | 0,43817 | 1,305859787 | 0,00044 | TMED9    | transmembrane emp24 protein transport domain containing 9           |
| 1,068805991 | 0,49586 | 1,222640278 | 0,02445 | TMED9    | transmembrane emp24 protein transport domain containing 9           |
| 1,024556823 | 0,77725 | 1,135242102 | 0,0478  | TMEM102  | transmembrane protein 102                                           |
| 1,108032348 | 0,35242 | 1,181811547 | 0,02229 | TMEM104  | transmembrane protein 104                                           |
| 0,874784765 | 0,5384  | 0,720464874 | 0,00683 | TMEM106B | transmembrane protein 106B                                          |
| 1,056285625 | 0,89641 | 0,708578698 | 0,00135 | TMEM106B | transmembrane protein 106B                                          |
| 0,959264119 | 0,84467 | 0,832198735 | 0,02524 | TMEM106B | transmembrane protein 106B                                          |
| 1,059952783 | 0,64709 | 1,134455485 | 0,01913 | TMEM107  | transmembrane protein 107                                           |
| 0,821310701 | 0,12265 | 0,773246337 | 0,00008 | TMEM111  | transmembrane protein 111                                           |
| 1,278099363 | 0,20674 | 1,460032011 | 0,01499 | TMEM119  | transmembrane protein 119                                           |
| 1,01395948  | 0,91301 | 1,204137381 | 0,00013 | TMEM120B | transmembrane protein 120B                                          |
| 1,187559666 | 0,07697 | 1,175276328 | 0,04872 | TMEM121  | transmembrane protein 121                                           |
| 0,835666959 | 0,40753 | 0,774855931 | 0,03277 | TMEM123  | transmembrane protein 123                                           |
| 0,996540263 | 0,98513 | 0,817902059 | 0,01688 | TMEM128  | transmembrane protein 128                                           |
| 0,985549337 | 0,80334 | 1,143930973 | 0,00484 | TMEM130  | transmembrane protein 130                                           |
| 1,506290467 | 0,05743 | 1,453972517 | 0,00054 | TMEM132A | transmembrane protein 132A                                          |
| 1,056285625 | 0,80243 | 0,893165852 | 0,03837 | TMEM132B | transmembrane protein 132B                                          |
| 1,110338834 | 0,29938 | 1,158292806 | 0,0076  | TMEM136  | transmembrane protein 136                                           |
| 1,163120042 | 0,17242 | 1,246601194 | 0,00254 | TMEM143  | transmembrane protein 143                                           |
| 0,953298545 | 0,80404 | 0,819036698 | 0,01657 | TMEM144  | transmembrane protein 144                                           |
| 1,009751298 | 0,91777 | 1,164733586 | 0,0042  | TMEM145  | transmembrane protein 145                                           |
| 0,91383145  | 0,27797 | 0,852044095 | 0,00167 | TMEM14B  | transmembrane protein 14B                                           |
| 1,035982764 | 0,7885  | 1,142346247 | 0,02356 | TMEM151B | transmembrane protein 151B                                          |
| 1,0132569   | 0,8985  | 1,170398641 | 0,00232 | TMEM161A | transmembrane protein 161A                                          |
| 1,00486382  | 0,97926 | 0,836826243 | 0,03259 | TMEM161B | transmembrane protein 161B                                          |
| 1           | 0,99891 | 0,878430468 | 0,03074 | TMEM161B | transmembrane protein 161B                                          |
| 0,858565436 | 0,36961 | 0,746906729 | 0,00169 | TMEM165  | transmembrane protein 165                                           |
| 0,770037174 | 0,07977 | 0,77916458  | 0,00698 | TMEM167A | transmembrane protein 167A                                          |
| 0,760489377 | 0,13822 | 0,822450069 | 0,00165 | TMEM168  | transmembrane protein 168                                           |
| 1,143930973 | 0,08786 | 1,231144413 | 0,00156 | TMEM169  | transmembrane protein 169                                           |
| 1,220946513 | 0,35408 | 1,244011653 | 0,0039  | TMEM173  | transmembrane protein 173                                           |
| 1,083725967 | 0,74739 | 1,216722359 | 0,00786 | TMEM173  | transmembrane protein 173                                           |
| 1,118061851 | 0,12946 | 1,147902414 | 0,0072  | TMEM174  | transmembrane protein 174                                           |
| 1,204972315 | 0,14238 | 1,159095952 | 0,00808 | TMEM175  | transmembrane protein 175                                           |
| 1,07997656  | 0,43079 | 1,180174343 | 0,01617 | TMEM177  | transmembrane protein 177                                           |
| 0,975355462 | 0,85994 | 1,204972315 | 0,00443 | TMEM179B | transmembrane protein 179B                                          |
| 0,839731493 | 0,54411 | 0,779704843 | 0,00057 | TMEM181  | transmembrane protein 181                                           |
| 0,898755127 | 0,377   | 0,825305409 | 0,00368 | TMEM184C | transmembrane protein 184C                                          |
| 1,019597683 | 0,84566 | 0,803850991 | 0,00665 | TMEM185B | transmembrane protein 185B                                          |
| 0,827596816 | 0,07844 | 0,863339559 | 0,00534 | TMEM186  | transmembrane protein 186                                           |
| 0,86934456  | 0,21236 | 0,79940583  | 0,01922 | TMEM188  | transmembrane protein 188                                           |
| 0,849684999 | 0,14124 | 0,829894586 | 0,00601 | TMEM191A | transmembrane protein 191A                                          |
| 0,96727633  | 0,73071 | 1,188383105 | 0,03601 | TMEM194A | transmembrane protein 194A                                          |
| 1,224336392 | 0,05098 | 1,21167266  | 0,00137 | TMEM201  | transmembrane protein 201                                           |
| 1,214194884 | 0,51208 | 1,330529041 | 0,00001 | TMEM205  | transmembrane protein 205                                           |
| 1,197478705 | 0,24977 | 1,179356592 | 0,00074 | TMEM208  | transmembrane protein 208                                           |
| 1,32592576  | 0,218   | 1,31494276  | 0,00487 | TMEM214  | transmembrane protein 214                                           |
| 0,997231251 | 0,97105 | 1,144724161 | 0,03906 | TMEM219  | transmembrane protein 219                                           |
| 1,051172909 | 0,63473 | 1,100378609 | 0,04871 | TMEM221  | transmembrane protein 221                                           |
| 1,025267238 | 0,79477 | 1,255271991 | 0,00235 | TMEM223  | transmembrane protein 223                                           |
| 0,992404375 | 0,92862 | 1,118061851 | 0,02231 | TMEM229B | transmembrane protein 229B                                          |

|             |         |             |         |           |                                                                            |
|-------------|---------|-------------|---------|-----------|----------------------------------------------------------------------------|
| 1,21335356  | 0,15532 | 1,271913007 | 0,0057  | TMEM229B  | transmembrane protein 229B                                                 |
| 0,987600861 | 0,87843 | 0,87539133  | 0,044   | TMEM231   | transmembrane protein 231                                                  |
| 1,027401439 | 0,76515 | 1,143930973 | 0,03463 | TMEM234   | transmembrane protein 234                                                  |
| 1,107264584 | 0,38922 | 1,161508732 | 0,03877 | TMEM234   | transmembrane protein 234                                                  |
| 1,090507733 | 0,41905 | 1,142346247 | 0,03344 | TMEM235   | transmembrane protein 235                                                  |
| 0,725476104 | 0,08246 | 0,675955417 | 0,00124 | TMEM30B   | transmembrane protein 30B                                                  |
| 0,951318276 | 0,81621 | 0,744838732 | 0,00995 | TMEM33    | transmembrane protein 33                                                   |
| 0,71548826  | 0,09088 | 0,714992493 | 0,00001 | TMEM33    | transmembrane protein 33                                                   |
| 1,043188594 | 0,84968 | 0,903752727 | 0,04626 | TMEM33    | transmembrane protein 33                                                   |
| 0,985549337 | 0,95379 | 0,734075318 | 0,00433 | TMEM33    | transmembrane protein 33                                                   |
| 0,963261894 | 0,76967 | 0,877821798 | 0,01678 | TMEM35    | transmembrane protein 35                                                   |
| 1,136816973 | 0,32973 | 1,350037985 | 0,00224 | TMEM37    | transmembrane protein 37                                                   |
| 1,215036792 | 0,3564  | 0,818469182 | 0,00626 | TMEM38B   | transmembrane protein 38B                                                  |
| 1,022428531 | 0,78364 | 1,209155676 | 0,01472 | TMEM39A   | transmembrane protein 39A                                                  |
| 1,034547582 | 0,87271 | 1,271913007 | 0,00428 | TMEM39B   | transmembrane protein 39B                                                  |
| 0,631126016 | 0,05631 | 0,823591017 | 0,0056  | TMEM43    | transmembrane protein 43                                                   |
| 1,024556823 | 0,82072 | 1,270150983 | 0,00363 | TMEM44    | transmembrane protein 44                                                   |
| 0,717474767 | 0,12693 | 0,683020128 | 0,00035 | TMEM45B   | transmembrane protein 45B                                                  |
| 0,999307093 | 0,99523 | 0,882702996 | 0,03372 | TMEM48    | transmembrane protein 48                                                   |
| 1,002776436 | 0,98825 | 0,72597914  | 0,00354 | TMEM5     | transmembrane protein 5                                                    |
| 0,843815796 | 0,11789 | 0,816768991 | 0,01504 | TMEM57    | transmembrane protein 57                                                   |
| 1,143138335 | 0,24847 | 1,220946513 | 0,00289 | TMEM59    | transmembrane protein 59                                                   |
| 1,067325338 | 0,55842 | 1,155886707 | 0,02445 | TMEM63A   | transmembrane protein 63A                                                  |
| 0,752623374 | 0,26973 | 0,739693755 | 0,00093 | TMEM65    | transmembrane protein 65                                                   |
| 0,974004269 | 0,71759 | 0,906890329 | 0,01078 | TMEM67    | transmembrane protein 67                                                   |
| 0,79940583  | 0,16849 | 0,808320869 | 0,01429 | TMEM68    | transmembrane protein 68                                                   |
| 0,933679945 | 0,75927 | 0,643940815 | 0,00082 | TMEM68    | transmembrane protein 68                                                   |
| 0,863339559 | 0,39852 | 0,811127156 | 0,00697 | TMEM69    | transmembrane protein 69                                                   |
| 1,064370182 | 0,49012 | 1,250062303 | 0,00335 | TMEM72    | transmembrane protein 72                                                   |
| 0,989656656 | 0,94849 | 0,837406488 | 0,00195 | TMEM80    | transmembrane protein 80                                                   |
| 0,790589117 | 0,15263 | 0,844986384 | 0,00022 | TMEM87A   | transmembrane protein 87A                                                  |
| 1,011152081 | 0,90946 | 0,8962667   | 0,03156 | TMEM87A   | transmembrane protein 87A                                                  |
| 0,946713631 | 0,79503 | 1,182631    | 0,0112  | TMEM9     | transmembrane protein 9                                                    |
| 1,036701101 | 0,76428 | 1,119612889 | 0,02792 | TMEM9     | transmembrane protein 9                                                    |
| 0,860949188 | 0,16739 | 1,143930973 | 0,01343 | TMEM92    | transmembrane protein 92                                                   |
| 1,090507733 | 0,39999 | 1,143930973 | 0,00914 | TMEM92    | transmembrane protein 92                                                   |
| 1,161508732 | 0,13912 | 1,305859787 | 0,00017 | TMEM95    | transmembrane protein 95                                                   |
| 0,806641759 | 0,10926 | 0,890692901 | 0,03161 | TMEM97    | transmembrane protein 97                                                   |
| 0,78024548  | 0,15055 | 0,860352631 | 0,02251 | TMEM97    | transmembrane protein 97                                                   |
| 0,751059963 | 0,28044 | 0,746906729 | 0,01579 | TMOD2     | tropomodulin 2 (neuronal)                                                  |
| 0,654742712 | 0,07024 | 0,67689314  | 0,0007  | TMOD3     | tropomodulin 3 (ubiquitous)                                                |
| 0,668500248 | 0,06542 | 0,76684133  | 0,03014 | TMPRSS11B | transmembrane protease, serine 11B                                         |
| 1,207480591 | 0,15497 | 1,25962998  | 0,00143 | TMPRSS2   | transmembrane protease, serine 2                                           |
| 1,301341855 | 0,19223 | 1,335148303 | 0,00647 | TMPRSS4   | transmembrane protease, serine 4                                           |
| 1,220946513 | 0,06268 | 1,351910833 | 0,00004 | TMPRSS6   | transmembrane protease, serine 6                                           |
| 0,708578698 | 0,35725 | 1,120389214 | 0,03299 | TMSB10    | thymosin beta 10                                                           |
| 1,132883885 | 0,32801 | 1,07997656  | 0,03291 | TMSB15B   | thymosin beta 15B                                                          |
| 1,679462986 | 0,09561 | 1,464085696 | 0,00731 | TMTC1     | transmembrane and tetratricopeptide repeat containing 1                    |
| 1,107264584 | 0,33244 | 1,118837101 | 0,04273 | TMTC1     | transmembrane and tetratricopeptide repeat containing 1                    |
| 1,017479692 | 0,96134 | 0,695923196 | 0,01716 | TMTC2     | transmembrane and tetratricopeptide repeat containing 2                    |
| 0,898132373 | 0,20764 | 0,807760778 | 0,00116 | TMTC3     | transmembrane and tetratricopeptide repeat containing 3                    |
| 0,701735863 | 0,16121 | 0,713507253 | 0,0023  | TMTC3     | transmembrane and tetratricopeptide repeat containing 3                    |
| 0,746389192 | 0,28269 | 0,732550437 | 0,00049 | TMTC3     | transmembrane and tetratricopeptide repeat containing 3                    |
| 1,16634937  | 0,24113 | 1,187559666 | 0,0095  | TMUB1     | transmembrane and ubiquitin-like domain containing 1                       |
| 0,878430468 | 0,43574 | 0,852634892 | 0,00959 | TMX1      | thioredoxin-related transmembrane protein 1                                |
| 0,815637493 | 0,26011 | 0,863938187 | 0,02006 | TMX3      | thioredoxin-related transmembrane protein 3                                |
| 1,142346247 | 0,25741 | 1,32408891  | 0,00145 | TNFAIP2   | tumor necrosis factor, alpha-induced protein 2                             |
| 1,269270886 | 0,27601 | 1,255271991 | 0,00311 | TNFAIP2   | tumor necrosis factor, alpha-induced protein 2                             |
| 1,057750964 | 0,5472  | 1,167906737 | 0,03371 | TNFAIP8L1 | tumor necrosis factor, alpha-induced protein 8-like 1                      |
| 0,71449707  | 0,07049 | 0,811127156 | 0,03766 | TNFRSF10A | tumor necrosis factor receptor superfamily, member 10a                     |
| 0,814507563 | 0,38827 | 0,691595315 | 0,00018 | TNFRSF10A | tumor necrosis factor receptor superfamily, member 10a                     |
| 0,76950361  | 0,26248 | 0,717474767 | 0,01104 | TNFRSF11A | tumor necrosis factor receptor superfamily, member 11a, NFKB activator     |
| 1,235418637 | 0,06337 | 1,277213759 | 0,00819 | TNFRSF13B | tumor necrosis factor receptor superfamily, member 13B                     |
| 1,20664392  | 0,09416 | 1,172834949 | 0,02829 | TNFRSF13C | tumor necrosis factor receptor superfamily, member 13C                     |
| 0,992404375 | 0,97418 | 1,245737416 | 0,0099  | TNFRSF21  | tumor necrosis factor receptor superfamily, member 21                      |
| 1,255271991 | 0,11911 | 1,375541818 | 0,00011 | TNFRSF4   | tumor necrosis factor receptor superfamily, member 4                       |
| 0,834509281 | 0,51733 | 1,22010051  | 0,04284 | TNFSF10   | tumor necrosis factor (ligand) superfamily, member 10                      |
| 0,775393206 | 0,45707 | 1,384149716 | 0,00024 | TNFSF10   | tumor necrosis factor (ligand) superfamily, member 10                      |
| 1,135242102 | 0,65809 | 1,284315809 | 0,03475 | TNFSF10   | tumor necrosis factor (ligand) superfamily, member 10                      |
| 1,685293659 | 0,05359 | 1,278099363 | 0,02745 | TNFSF13B  | tumor necrosis factor (ligand) superfamily, member 13b                     |
| 1,139973273 | 0,11462 | 1,145517898 | 0,02596 | TNFSF8    | tumor necrosis factor (ligand) superfamily, member 8                       |
| 0,995849753 | 0,97941 | 1,20163605  | 0,02882 | TNK1      | tyrosine kinase, non-receptor, 1                                           |
| 1,120389214 | 0,19863 | 0,915733686 | 0,01975 | TNKS      | tankyrase, TRF1-interacting ankyrin-related ADP-ribose polymerase          |
| 0,971307496 | 0,71336 | 0,925304428 | 0,0202  | TNKS2     | tankyrase, TRF1-interacting ankyrin-related ADP-ribose polymerase 2        |
| 1,188383105 | 0,0518  | 1,254402205 | 0,00251 | TNNT2     | troponin T type 2 (cardiac)                                                |
| 1,016070143 | 0,82966 | 1,129747215 | 0,0104  | TNNT3     | troponin T type 3 (skeletal, fast)                                         |
| 1,070288698 | 0,54231 | 1,190856849 | 0,02431 | TNPO1     | transportin 1                                                              |
| 0,796640096 | 0,11593 | 0,739693755 | 0,0007  | TNPO1     | transportin 1                                                              |
| 0,78132788  | 0,29586 | 0,827023368 | 0,00644 | TNPO1     | transportin 1                                                              |
| 0,878430468 | 0,39504 | 0,864537231 | 0,00713 | TNPO1     | transportin 1                                                              |
| 0,727490342 | 0,37395 | 0,820741609 | 0,00131 | TNPO1     | transportin 1                                                              |
| 1,095811766 | 0,55465 | 0,819604608 | 0,00714 | TNPO1     | transportin 1                                                              |
| 0,887611337 | 0,61625 | 0,789493887 | 0,01326 | TNPO1     | transportin 1                                                              |
| 0,995159722 | 0,98387 | 0,847332435 | 0,00876 | TNPO1     | transportin 1                                                              |
| 1,167158102 | 0,14843 | 0,908148418 | 0,03855 | TNPO1     | transportin 1                                                              |
| 1,07997656  | 0,29119 | 1,17609125  | 0,00021 | TNR       | tenascin R (restrictin, janusin)                                           |
| 1,155886707 | 0,15769 | 1,266634254 | 0,00063 | TNRC18    | trinucleotide repeat containing 18                                         |
| 1,009751298 | 0,90732 | 1,164733586 | 0,02468 | TNRC18    | trinucleotide repeat containing 18                                         |
| 0,879649076 | 0,66639 | 0,765778999 | 0,00739 | TNRC6B    | trinucleotide repeat containing 6B                                         |
| 1,163120042 | 0,1802  | 1,191682575 | 0,02158 | TNRC6C    | trinucleotide repeat containing 6C                                         |
| 1,119612889 | 0,28956 | 0,798298386 | 0,00877 | TNS1      | tensin 1                                                                   |
| 0,933679945 | 0,75856 | 0,794985251 | 0,03124 | TOB1      | transducer of ERBB2, 1                                                     |
| 0,948026965 | 0,57432 | 1,094293701 | 0,02298 | TOLLIP    | toll interacting protein                                                   |
| 0,995849753 | 0,95945 | 0,821880187 | 0,02682 | TOMM22    | translocase of outer mitochondrial membrane 22 homolog (yeast)             |
| 0,957271458 | 0,6569  | 0,872362706 | 0,00846 | TOMM5     | translocase of outer mitochondrial membrane 5 homolog (yeast)              |
| 0,736113431 | 0,07671 | 0,868742185 | 0,03324 | TOMM5     | translocase of outer mitochondrial membrane 5 homolog (yeast)              |
| 0,85086373  | 0,37822 | 0,816768991 | 0,00008 | TOMM70A   | translocase of outer mitochondrial membrane 70 homolog A (S. cerevisiae)   |
| 0,997922719 | 0,98    | 0,925946023 | 0,02806 | TOP1MT    | topoisomerase (DNA) I, mitochondrial                                       |
| 0,740206649 | 0,10912 | 0,830470024 | 0,01259 | TOP2B     | topoisomerase (DNA) II beta 180kDa                                         |
| 0,689680461 | 0,14575 | 0,763129604 | 0,00067 | TOPBP1    | topoisomerase (DNA) II binding protein 1                                   |
| 0,777007269 | 0,31108 | 0,70270935  | 0,01171 | TOPORS    | topoisomerase I binding, arginine/serine-rich, E3 ubiquitin protein ligase |
| 0,851453708 | 0,42221 | 0,77271055  | 0,00368 | TOR1AIP1  | torsin A interacting protein 1                                             |
| 0,87175824  | 0,24525 | 0,854409741 | 0,04824 | TOR1AIP1  | torsin A interacting protein 1                                             |
| 0,834509281 | 0,30996 | 0,785128119 | 0,0065  | TOR1AIP2  | torsin A interacting protein 2                                             |

|             |         |             |         |              |                                                                                |
|-------------|---------|-------------|---------|--------------|--------------------------------------------------------------------------------|
| 1,020304659 | 0,79924 | 1,130530567 | 0,04269 | TOR1AIP2     | torsin A interacting protein 2                                                 |
| 1,038859103 | 0,71744 | 0,872362706 | 0,00333 | TOR1B        | torsin family 1, member B (torsin B)                                           |
| 1,559409685 | 0,06053 | 1,31494276  | 0,01587 | TOX          | thymocyte selection-associated high mobility group box                         |
| 0,992404375 | 0,97614 | 0,816768991 | 0,04552 | TOX3         | TOX high mobility group box family member 3                                    |
| 1,00486382  | 0,96753 | 0,833353207 | 0,02546 | TOX3         | TOX high mobility group box family member 3                                    |
| 1,006257823 | 0,95184 | 0,833931044 | 0,01884 | TOX4         | TOX high mobility group box family member 4                                    |
| 0,96727633  | 0,75181 | 1,142346247 | 0,00589 | TP53BP1      | tumor protein p53 binding protein 1                                            |
| 1,016070143 | 0,90317 | 1,312211255 | 0,0042  | TP53I1       | tumor protein p53 inducible protein 11                                         |
| 0,844986384 | 0,40038 | 1,184271612 | 0,0254  | TP53I3       | tumor protein p53 inducible protein 3                                          |
| 0,882702996 | 0,18503 | 0,810003474 | 0,00038 | TP53RK       | TP53 regulating kinase                                                         |
| 0,759435845 | 0,05705 | 0,823591017 | 0,00965 | TP63         | tumor protein p63                                                              |
| 1,014662547 | 0,90684 | 1,154285418 | 0,01884 | TP73-AS1     | TP73 antisense RNA 1 (non-protein coding)                                      |
| 0,677362489 | 0,06969 | 0,740206649 | 0,00195 | TPBG         | trophoblast glycoprotein                                                       |
| 1,009751298 | 0,94975 | 0,903752727 | 0,03766 | TPCN2        | two pore segment channel 2                                                     |
| 0,910669834 | 0,53095 | 0,723969086 | 0,01319 | TPD52        | tumor protein D52                                                              |
| 0,903752727 | 0,43466 | 0,813943185 | 0,00452 | TPD52        | tumor protein D52                                                              |
| 0,794985251 | 0,15836 | 0,79940583  | 0,0116  | TPD52        | tumor protein D52                                                              |
| 0,60583633  | 0,20397 | 0,716480825 | 0,01005 | TPD52L1      | tumor protein D52-like 1                                                       |
| 1,160703914 | 0,16778 | 1,25353302  | 0,00607 | TPD52L3      | tumor protein D52-like 3                                                       |
| 1,551861709 | 0,07031 | 1,41519416  | 0,00408 | TPM1         | tropomyosin 1 (alpha)                                                          |
| 1,308578071 | 0,21206 | 1,442928687 | 0,00109 | TPM1         | tropomyosin 1 (alpha)                                                          |
| 1,121166078 | 0,3707  | 1,346300069 | 0,00061 | TPM1         | tropomyosin 1 (alpha)                                                          |
| 1,106497353 | 0,19041 | 1,322254605 | 0,00013 | TPM2         | tropomyosin 2 (beta)                                                           |
| 1,035264924 | 0,67487 | 1,114193651 | 0,0484  | TPM3         | tropomyosin 3                                                                  |
| 0,70027816  | 0,13504 | 0,749499801 | 0,00734 | TPM4         | tropomyosin 4                                                                  |
| 0,807201075 | 0,07375 | 0,826450318 | 0,00028 | TPMT         | thiopurine S-methyltransferase                                                 |
| 0,982820599 | 0,93604 | 1,172834949 | 0,01473 | TPP1         | tripeptidyl peptidase I                                                        |
| 0,992404375 | 0,96328 | 1,188383105 | 0,00173 | TPP1         | tripeptidyl peptidase I                                                        |
| 1,074749173 | 0,59354 | 1,257013375 | 0,00087 | TPP1         | tripeptidyl peptidase I                                                        |
| 0,885153765 | 0,34849 | 0,774855931 | 0,00327 | TPPP         | tubulin polymerization promoting protein                                       |
| 1,057570964 | 0,39188 | 1,160703914 | 0,01709 | TPPP2        | tubulin polymerization-promoting protein family member 2                       |
| 0,886996305 | 0,76634 | 0,701735863 | 0,00024 | TPR          | translocated promoter region (to activated MET oncogene)                       |
| 0,808320869 | 0,1727  | 0,874784765 | 0,01584 | TPRG1L       | tumor protein p63 regulated 1-like                                             |
| 0,868140228 | 0,64047 | 1,402499251 | 0,01893 | TPSAB1       | tryptase alpha/beta 1                                                          |
| 0,892546971 | 0,63284 | 1,394743666 | 0,00334 | TPSAB1       | tryptase alpha/beta 1                                                          |
| 0,940174203 | 0,8028  | 1,337927555 | 0,04522 | TPSAB1       | tryptase alpha/beta 1                                                          |
| 0,888842681 | 0,64463 | 1,337000495 | 0,03333 | TPSAB1       | tryptase alpha/beta 1                                                          |
| 0,869947353 | 0,60013 | 1,403471726 | 0,02688 | TPSB2        | tryptase beta 2 (gene/pseudogene)                                              |
| 1,086734863 | 0,50553 | 1,222640278 | 0,0462  | TPST1        | tyrosylprotein sulfotransferase 1                                              |
| 1,002081605 | 0,98498 | 1,196648963 | 0,00157 | TPTE2P1      | transmembrane phosphoinositide 3-phosphatase and tensin homolog 2 pseudogene 1 |
| 1,231998073 | 0,10664 | 1,093535457 | 0,03444 | TPTE2P6      | transmembrane phosphoinositide 3-phosphatase and tensin homolog 2 pseudogene 6 |
| 0,805524291 | 0,62941 | 0,690158677 | 0,00012 | TRA2A        | transformer 2 alpha homolog (Drosophila)                                       |
| 0,917639882 | 0,5187  | 0,722966147 | 0,00188 | TRA2A        | transformer 2 alpha homolog (Drosophila)                                       |
| 0,942131274 | 0,42537 | 0,8962667   | 0,02418 | TRA2B        | transformer 2 beta homolog (Drosophila)                                        |
| 1,350037985 | 0,13391 | 1,450952208 | 0,0034  | TRAC         | T cell receptor alpha constant                                                 |
| 1,091263877 | 0,41382 | 1,149494848 | 0,00764 | TRADD        | TNFRSF1A-associated via death domain                                           |
| 0,898132373 | 0,63806 | 0,808320869 | 0,00137 | TRAF3IP1     | TNF receptor-associated factor 3 interacting protein 1                         |
| 0,974004269 | 0,72737 | 0,854409741 | 0,00615 | TRAF3IP2     | TRAF3 interacting protein 2                                                    |
| 1,234562607 | 0,08888 | 1,145517898 | 0,01551 | TRAF3IP2-AS1 | TRAF3IP2 antisense RNA 1 (non-protein coding)                                  |
| 1,205807828 | 0,227   | 1,22603486  | 0,0033  | TRAF4        | TNF receptor-associated factor 4                                               |
| 1,454980684 | 0,12465 | 1,382232207 | 0,02245 | TRAF5        | TNF receptor-associated factor 5                                               |
| 1,057750964 | 0,69271 | 0,908778116 | 0,03159 | TRAF7        | TNF receptor-associated factor 7                                               |
| 1,077733145 | 0,39454 | 1,144724161 | 0,00441 | TRAU17       | T cell receptor alpha joining 17                                               |
| 0,734584317 | 0,14283 | 1,262252032 | 0,00341 | TRAK1        | trafficking protein, kinesin binding 1                                         |
| 0,866937564 | 0,33775 | 0,882702996 | 0,02163 | TRAK1        | trafficking protein, kinesin binding 1                                         |
| 1,471206746 | 0,24611 | 1,622254311 | 0,00008 | TRAM2        | translocation associated membrane protein 2                                    |
| 1,420107359 | 0,17794 | 1,549711862 | 0,00022 | TRAM2        | translocation associated membrane protein 2                                    |
| 1,16634937  | 0,38526 | 0,759435845 | 0,00526 | TRAPPC10     | trafficking protein particle complex 10                                        |
| 1,058484395 | 0,58447 | 0,90062598  | 0,03713 | TRAPPC10     | trafficking protein particle complex 10                                        |
| 0,912565489 | 0,53612 | 0,755236293 | 0,0004  | TRAPPC10     | trafficking protein particle complex 10                                        |
| 1,025978145 | 0,84992 | 1,095052471 | 0,03592 | TRAPPC6A     | trafficking protein particle complex 6A                                        |
| 0,795536484 | 0,22376 | 0,789493887 | 0,00019 | TRAPPC8      | trafficking protein particle complex 8                                         |
| 1,088242442 | 0,23802 | 1,092777739 | 0,03989 | TRBV25-1     | T cell receptor beta variable 25-1                                             |
| 1,085981856 | 0,35744 | 1,108800644 | 0,04762 | TRBV7-3      | T cell receptor beta variable 7-3                                              |
| 1,043911927 | 0,54021 | 1,096571589 | 0,03079 | TRDV2        | T cell receptor delta variable 2                                               |
| 1,210833084 | 0,20378 | 1,419123356 | 0,00011 | TREM1        | triggering receptor expressed on myeloid cells 1                               |
| 1,158292806 | 0,23524 | 1,25092908  | 0,00465 | TREM2        | triggering receptor expressed on myeloid cells 2                               |
| 1,025267238 | 0,8051  | 1,161508732 | 0,01834 | TREML2       | triggering receptor expressed on myeloid cells-like 2                          |
| 1,159095952 | 0,20239 | 1,186736798 | 0,0024  | TRERF1       | transcriptional regulating factor 1                                            |
| 0,806641759 | 0,34205 | 0,641268301 | 0,00119 | TRERF1       | transcriptional regulating factor 1                                            |
| 1,088242442 | 0,38608 | 1,140763716 | 0,03107 | TRGV5        | T cell receptor gamma variable 5                                               |
| 1,151089491 | 0,20102 | 1,179356592 | 0,00114 | TRH          | thyrotropin-releasing hormone                                                  |
| 1,009751298 | 0,95887 | 1,178539408 | 0,03619 | TRIB2        | tribbles homolog 2 (Drosophila)                                                |
| 1,002776436 | 0,97903 | 1,109569472 | 0,04887 | TRIB3        | tribbles homolog 3 (Drosophila)                                                |
| 0,525222272 | 0,07341 | 0,55632506  | 0,00003 | TRIM13       | tripartite motif containing 13                                                 |
| 0,820741609 | 0,14395 | 0,791137301 | 0,00549 | TRIM13       | tripartite motif containing 13                                                 |
| 0,637722196 | 0,21266 | 0,602068691 | 0,00006 | TRIM13       | tripartite motif containing 13                                                 |
| 0,647521499 | 0,10968 | 0,726482525 | 0,00003 | TRIM13       | tripartite motif containing 13                                                 |
| 0,832775771 | 0,14992 | 0,811689581 | 0,01413 | TRIM14       | tripartite motif containing 14                                                 |
| 0,870550563 | 0,4373  | 0,756283999 | 0,00015 | TRIM14       | tripartite motif containing 14                                                 |
| 1,149494848 | 0,11681 | 1,205807828 | 0,00565 | TRIM14       | tripartite motif containing 14                                                 |
| 1,072516617 | 0,44245 | 1,091263877 | 0,03328 | TRIM15       | tripartite motif containing 15                                                 |
| 1,119612889 | 0,71679 | 0,786762445 | 0,00688 | TRIM23       | tripartite motif containing 23                                                 |
| 0,863339559 | 0,35498 | 0,849096246 | 0,04462 | TRIM24       | tripartite motif containing 24                                                 |
| 0,805524291 | 0,23435 | 0,793883931 | 0,01475 | TRIM24       | tripartite motif containing 24                                                 |
| 1,10343374  | 0,4213  | 1,154285418 | 0,00605 | TRIM26       | tripartite motif containing 26                                                 |
| 1,517819253 | 0,16085 | 1,252664439 | 0,00256 | TRIM27       | tripartite motif containing 27                                                 |
| 0,505225723 | 0,1025  | 0,73153561  | 0,004   | TRIM29       | tripartite motif containing 29                                                 |
| 0,771105413 | 0,21568 | 0,764718139 | 0,00018 | TRIM33       | tripartite motif containing 33                                                 |
| 0,744322628 | 0,09742 | 0,691595315 | 0,00016 | TRIM33       | tripartite motif containing 33                                                 |
| 1,167967395 | 0,19481 | 1,144724161 | 0,00648 | TRIM36       | tripartite motif containing 36                                                 |
| 1,00486382  | 0,9696  | 0,876605721 | 0,01479 | TRIM36       | tripartite motif containing 36                                                 |
| 1,271913007 | 0,11823 | 1,341642225 | 0,03013 | TRIM4        | tripartite motif containing 4                                                  |
| 1,125838586 | 0,12565 | 1,084477409 | 0,03774 | TRIM42       | tripartite motif containing 42                                                 |
| 0,639936207 | 0,13911 | 0,531447837 | 0,00006 | TRIM59       | tripartite motif containing 59                                                 |
| 0,941478465 | 0,5941  | 1,122721422 | 0,03008 | TRIM62       | tripartite motif containing 62                                                 |
| 1,016774673 | 0,78575 | 1,17772279  | 0,04318 | TRIM65       | tripartite motif containing 65                                                 |
| 0,806082831 | 0,29198 | 0,827023368 | 0,01305 | TRIM66       | tripartite motif containing 66                                                 |
| 0,892546971 | 0,40465 | 0,846158597 | 0,03759 | TRIM69       | tripartite motif containing 69                                                 |
| 1,070288698 | 0,6573  | 0,757858283 | 0,03469 | TRIM73       | tripartite motif containing 73                                                 |
| 1,199139914 | 0,22842 | 1,143138335 | 0,04075 | TRIM78P      | tripartite motif containing 78, pseudogene                                     |
| 1,182631    | 0,0904  | 1,135242102 | 0,02965 | TRIM8        | tripartite motif containing 8                                                  |
| 1,113421618 | 0,26488 | 1,144724161 | 0,01337 | TRIO         | triple functional domain (PTPRF interacting)                                   |
| 1,009051634 | 0,95398 | 1,163120042 | 0,04834 | TRIO         | triple functional domain (PTPRF interacting)                                   |

|             |         |             |         |          |                                                                    |
|-------------|---------|-------------|---------|----------|--------------------------------------------------------------------|
| 1,122721422 | 0,24392 | 1,143930973 | 0,02909 | TRIO     | triple functional domain (PTPRF interacting)                       |
| 0,877213549 | 0,10095 | 0,734075318 | 0,00006 | TRIOBP   | TRIO and F-actin binding protein                                   |
| 0,977385766 | 0,90967 | 0,77916458  | 0,001   | TRIP13   | thyroid hormone receptor interactor 13                             |
| 0,918276162 | 0,61107 | 0,776468875 | 0,02571 | TRMT11   | tRNA methyltransferase 11 homolog (S. cerevisiae)                  |
| 1,085229372 | 0,24094 | 1,143930973 | 0,04561 | TRMT2A   | TRM2 tRNA methyltransferase 2 homolog A (S. cerevisiae)            |
| 0,874784765 | 0,58403 | 0,716977624 | 0,00021 | TRMT6    | tRNA methyltransferase 6 homolog (S. cerevisiae)                   |
| 0,984184022 | 0,9312  | 0,854409741 | 0,01477 | TRMT61B  | tRNA methyltransferase 61 homolog B (S. cerevisiae)                |
| 0,815072332 | 0,26095 | 0,805524291 | 0,01011 | TRNT1    | tRNA nucleotidyl transferase, CCA-adding, 1                        |
| 0,915733686 | 0,44441 | 1,248330549 | 0,00225 | TRO      | trophinin                                                          |
| 0,924022572 | 0,37887 | 1,298638603 | 0,00099 | TROAP    | trophinin associated protein (tastin)                              |
| 1,006257823 | 0,98055 | 0,868140228 | 0,03938 | TROVE2   | TROVE domain family, member 2                                      |
| 1,027401439 | 0,90494 | 0,853226098 | 0,02594 | TROVE2   | TROVE domain family, member 2                                      |
| 0,829319546 | 0,26134 | 0,829319546 | 0,00273 | TROVE2   | TROVE domain family, member 2                                      |
| 1,101141598 | 0,13878 | 1,071773463 | 0,04263 | TRPC3    | transient receptor potential cation channel, subfamily C, member 3 |
| 1,237990291 | 0,08641 | 1,278985581 | 0,00017 | TRPM2    | transient receptor potential cation channel, subfamily M, member 2 |
| 1,102669163 | 0,28279 | 1,230291345 | 0,00131 | TRPM3    | transient receptor potential cation channel, subfamily M, member 3 |
| 1,108800644 | 0,33265 | 1,133669413 | 0,03048 | TRPM3    | transient receptor potential cation channel, subfamily M, member 3 |
| 1,188383105 | 0,51574 | 0,794985251 | 0,03146 | TRPM7    | transient receptor potential cation channel, subfamily M, member 7 |
| 1,203303026 | 0,06152 | 1,173648178 | 0,00292 | TRPM8    | transient receptor potential cation channel, subfamily M, member 8 |
| 1,152686347 | 0,1951  | 1,142346247 | 0,0456  | TRPV1    | transient receptor potential cation channel, subfamily V, member 1 |
| 1,21167266  | 0,06574 | 1,151887642 | 0,00819 | TRPV2    | transient receptor potential cation channel, subfamily V, member 2 |
| 1,130530567 | 0,23204 | 1,148698355 | 0,01711 | TRPV3    | transient receptor potential cation channel, subfamily V, member 3 |
| 1,032398535 | 0,8919  | 0,84323111  | 0,02733 | TRUB1    | TruB pseudouridine (psi) synthase homolog 1 (E. coli)              |
| 0,822450069 | 0,19098 | 0,874784765 | 0,01673 | TSC1     | tuberous sclerosis 1                                               |
| 0,872967591 | 0,14947 | 0,86154616  | 0,04932 | TSC2     | tuberous sclerosis 2                                               |
| 1,402499251 | 0,15745 | 1,16634937  | 0,03126 | TSC2D1   | TSC2 domain family, member 1                                       |
| 0,936921447 | 0,69598 | 0,79940583  | 0,0359  | TSC2D2   | TSC2 domain family, member 2                                       |
| 1,015366101 | 0,8791  | 0,866937564 | 0,0066  | TSC2D2   | TSC2 domain family, member 2                                       |
| 1,189207115 | 0,36873 | 1,307671349 | 0,0059  | TSC2D3   | TSC2 domain family, member 3                                       |
| 1,088997015 | 0,36143 | 1,106497353 | 0,04182 | TSC2D3   | TSC2 domain family, member 3                                       |
| 1,120389214 | 0,44081 | 1,17609125  | 0,02765 | TSC2D4   | TSC2 domain family, member 4                                       |
| 0,771640088 | 0,05714 | 0,771105413 | 0,00112 | TSEN15   | tRNA splicing endonuclease 15 homolog (S. cerevisiae)              |
| 0,87175824  | 0,2011  | 0,889458994 | 0,02621 | TSEN34   | tRNA splicing endonuclease 34 homolog (S. cerevisiae)              |
| 1,009751298 | 0,91598 | 0,873572896 | 0,04978 | TSEN54   | tRNA splicing endonuclease 54 homolog (S. cerevisiae)              |
| 0,961927455 | 0,84923 | 0,770037174 | 0,00051 | TSFM     | Ts translation elongation factor, mitochondrial                    |
| 0,816768991 | 0,11362 | 0,817335328 | 0,01056 | TSG101   | tumor susceptibility gene 101                                      |
| 1,095052471 | 0,35966 | 1,199139914 | 0,00062 | TSHB     | thyroid stimulating hormone, beta                                  |
| 1,182631    | 0,0661  | 1,180174343 | 0,01238 | TSHR     | thyroid stimulating hormone receptor                               |
| 0,71548826  | 0,11299 | 0,707106781 | 0,00037 | TSH2     | teashirt zinc finger homeobox 1                                    |
| 0,747942879 | 0,06622 | 0,70759708  | 0,00609 | TSH2     | teashirt zinc finger homeobox 2                                    |
| 1,062159186 | 0,70133 | 0,834509281 | 0,00498 | TSLP     | thymic stromal lymphopoietin                                       |
| 0,7031966   | 0,15757 | 0,717972255 | 0,00005 | TSN      | translin                                                           |
| 0,917004043 | 0,55863 | 0,872967591 | 0,00559 | TSN      | translin                                                           |
| 1,084477409 | 0,3888  | 1,193335743 | 0,00804 | TSNAXIP1 | translin-associated factor X interacting protein 1                 |
| 1,151887642 | 0,22253 | 1,179356592 | 0,03764 | TSPAN12  | tetraspanin 12                                                     |
| 1,061423209 | 0,56429 | 1,284315809 | 0,00212 | TSPAN12  | tetraspanin 12                                                     |
| 1,182631    | 0,19879 | 1,327765158 | 0,00045 | TSPAN15  | tetraspanin 15                                                     |
| 1,407368375 | 0,08127 | 1,455989549 | 0,00044 | TSPAN18  | tetraspanin 18                                                     |
| 1,248330549 | 0,09181 | 1,293248932 | 0,00032 | TSPAN33  | tetraspanin 33                                                     |
| 1,284315809 | 0,12803 | 1,481439798 | 0,00001 | TSPAN4   | tetraspanin 4                                                      |
| 1,127400412 | 0,67571 | 1,416175438 | 0,00123 | TSPAN4   | tetraspanin 4                                                      |
| 1,028113827 | 0,87775 | 0,757333158 | 0,02774 | TSPAN6   | tetraspanin 6                                                      |
| 1,10343374  | 0,39081 | 1,156688184 | 0,02986 | TSPPEAR  | thrombospondin-type laminin G domain and EAR repeats               |
| 1,150291893 | 0,2142  | 1,218410264 | 0,00279 | TSPQ2    | translocator protein 2                                             |
| 0,925304428 | 0,69526 | 0,865136691 | 0,01632 | TSPYL1   | TSPY-like 1                                                        |
| 0,922742493 | 0,57474 | 0,84264683  | 0,01022 | TSPYL1   | TSPY-like 1                                                        |
| 1,070288698 | 0,57728 | 1,307671349 | 0,00046 | TSPYL2   | TSPY-like 2                                                        |
| 1,068065408 | 0,69524 | 0,807201075 | 0,00106 | TSPYL4   | TSPY-like 4                                                        |
| 0,922742493 | 0,35853 | 1,095052471 | 0,04541 | TSSK1B   | testis-specific serine kinase 1B                                   |
| 1,144724161 | 0,19807 | 1,123499903 | 0,04359 | TSSK6    | testis-specific serine kinase 6                                    |
| 1,194991205 | 0,06818 | 1,207480591 | 0,04986 | TTBK1    | tau tubulin kinase 1                                               |
| 1,159899655 | 0,20489 | 1,185092771 | 0,00845 | TTBK1    | tau tubulin kinase 1                                               |
| 0,871154192 | 0,45415 | 1,129747215 | 0,04557 | TTBK2    | tau tubulin kinase 2                                               |
| 1,147902414 | 0,51874 | 0,815072332 | 0,02666 | TTBK2    | tau tubulin kinase 2                                               |
| 1,047536127 | 0,63824 | 1,145517898 | 0,04827 | TTC16    | tetratricopeptide repeat domain 16                                 |
| 1,033830736 | 0,86204 | 1,191682575 | 0,00344 | TTC17    | tetratricopeptide repeat domain 17                                 |
| 0,841479482 | 0,30297 | 1,283425898 | 0,02321 | TTC17    | tetratricopeptide repeat domain 17                                 |
| 0,976708529 | 0,76597 | 1,082975046 | 0,03413 | TTC23    | tetratricopeptide repeat domain 23                                 |
| 0,893165852 | 0,17824 | 1,147902414 | 0,00275 | TTC23    | tetratricopeptide repeat domain 23                                 |
| 1,126619228 | 0,08586 | 0,844986384 | 0,0074  | TTC25    | tetratricopeptide repeat domain 25                                 |
| 1,009751298 | 0,94388 | 0,890692901 | 0,02578 | TTC26    | tetratricopeptide repeat domain 26                                 |
| 1,252664439 | 0,20861 | 0,87539133  | 0,02537 | TTC26    | tetratricopeptide repeat domain 26                                 |
| 0,771105413 | 0,12865 | 0,770571108 | 0,00008 | TTC27    | tetratricopeptide repeat domain 27                                 |
| 0,715984371 | 0,20722 | 0,694477568 | 0,01437 | TTC3     | tetratricopeptide repeat domain 3                                  |
| 0,838568184 | 0,2472  | 1,163120042 | 0,00485 | TTC3     | tetratricopeptide repeat domain 3                                  |
| 0,822450069 | 0,65299 | 0,883315051 | 0,03391 | TTC3     | tetratricopeptide repeat domain 3                                  |
| 0,938221197 | 0,85826 | 0,87175824  | 0,0124  | TTC3     | tetratricopeptide repeat domain 3                                  |
| 0,545253866 | 0,19176 | 0,822450069 | 0,00219 | TTC3     | tetratricopeptide repeat domain 3                                  |
| 1,048262476 | 0,80499 | 0,749499801 | 0,00369 | TTC30B   | tetratricopeptide repeat domain 30B                                |
| 1,064370182 | 0,52162 | 0,792784137 | 0,00045 | TTC32    | tetratricopeptide repeat domain 32                                 |
| 0,713012859 | 0,20541 | 0,788946841 | 0,00075 | TTC37    | tetratricopeptide repeat domain 37                                 |
| 0,685391402 | 0,11765 | 0,774319028 | 0,00934 | TTC37    | tetratricopeptide repeat domain 37                                 |
| 0,962594443 | 0,77844 | 1,190031696 | 0,01783 | TTC38    | tetratricopeptide repeat domain 38                                 |
| 1,125838586 | 0,41356 | 1,25353302  | 0,01132 | TTC38    | tetratricopeptide repeat domain 38                                 |
| 0,646176415 | 0,13627 | 0,630251696 | 0,00027 | TTC39B   | tetratricopeptide repeat domain 39B                                |
| 0,752101876 | 0,09424 | 0,76418826  | 0,01005 | TTC39B   | tetratricopeptide repeat domain 39B                                |
| 0,915733686 | 0,65514 | 0,697371833 | 0,00062 | TTC39B   | tetratricopeptide repeat domain 39B                                |
| 0,86154616  | 0,32735 | 0,871154192 | 0,035   | TTC39C   | tetratricopeptide repeat domain 39C                                |
| 0,697855382 | 0,18594 | 0,800514811 | 0,00836 | TTC39C   | tetratricopeptide repeat domain 39C                                |
| 0,90312651  | 0,32982 | 0,886996305 | 0,02123 | TTC4     | tetratricopeptide repeat domain 4                                  |
| 1,396678532 | 0,08279 | 1,155085785 | 0,0048  | TTC5     | tetratricopeptide repeat domain 5                                  |
| 0,706127202 | 0,08649 | 0,806082831 | 0,01677 | TTC8     | tetratricopeptide repeat domain 8                                  |
| 0,901875378 | 0,66092 | 0,668500248 | 0,00008 | TTC9     | tetratricopeptide repeat domain 9                                  |
| 0,882702996 | 0,30076 | 0,760489377 | 0,00502 | TTC9     | tetratricopeptide repeat domain 9                                  |
| 0,793333843 | 0,06295 | 0,755759964 | 0,0097  | TTC9C    | tetratricopeptide repeat domain 9C                                 |
| 1,151089491 | 0,07795 | 1,194991205 | 0,00424 | TTC9C    | tetratricopeptide repeat domain 9C                                 |
| 0,921464186 | 0,70693 | 0,812252396 | 0,01326 | TTF1     | transcription termination factor, RNA polymerase I                 |
| 0,870550563 | 0,59208 | 0,823591017 | 0,024   | TTK      | TTK protein kinase                                                 |
| 0,786217292 | 0,16885 | 0,77271055  | 0,00027 | TTL      | tubulin tyrosine ligase                                            |
| 1,053361036 | 0,63883 | 1,116512962 | 0,01926 | TTL1     | tubulin tyrosine ligase-like family, member 1                      |
| 1,193335743 | 0,09123 | 1,168777249 | 0,01568 | TTL10    | tubulin tyrosine ligase-like family, member 10                     |
| 1,063632673 | 0,52191 | 0,903752727 | 0,03958 | TTL11    | tubulin tyrosine ligase-like family, member 11                     |
| 1,086734863 | 0,50007 | 1,23370717  | 0,00075 | TTL11    | tubulin tyrosine ligase-like family, member 11                     |
| 0,813943185 | 0,2728  | 1,193335743 | 0,01723 | TTL3     | tubulin tyrosine ligase-like family, member 3                      |

|             |         |             |         |         |                                                                |
|-------------|---------|-------------|---------|---------|----------------------------------------------------------------|
| 0,960594864 | 0,6299  | 0,883927531 | 0,01566 | TLL5    | tubulin tyrosine ligase-like family, member 5                  |
| 0,992404375 | 0,94144 | 0,887611337 | 0,03586 | TLL5    | tubulin tyrosine ligase-like family, member 5                  |
| 0,735603373 | 0,07059 | 0,891928519 | 0,00944 | TLL5    | tubulin tyrosine ligase-like family, member 5                  |
| 0,954621014 | 0,86354 | 0,76630998  | 0,01562 | TLL5    | tubulin tyrosine ligase-like family, member 5                  |
| 1,041021598 | 0,69085 | 1,199139914 | 0,0025  | TLL6    | tubulin tyrosine ligase-like family, member 6                  |
| 1,163926534 | 0,10224 | 1,143930973 | 0,01381 | TLL9    | tubulin tyrosine ligase-like family, member 9                  |
| 1,190856849 | 0,17087 | 1,117287138 | 0,0047  | TTN     | titin                                                          |
| 0,815637493 | 0,10355 | 0,79940583  | 0,00215 | TPPAL   | tocopherol (alpha) transfer protein-like                       |
| 1,042465761 | 0,58409 | 1,148698355 | 0,00496 | TTY13   | testis-specific transcript, Y-linked 13 (non-protein coding)   |
| 1,171210181 | 0,1323  | 1,244874235 | 0,00155 | TTY5    | testis-specific transcript, Y-linked 5 (non-protein coding)    |
| 1,277213759 | 0,06044 | 1,158292806 | 0,03326 | TTYH2   | tweety homolog 2 (Drosophila)                                  |
| 1,266634254 | 0,09281 | 1,238848698 | 0,00158 | TTYH3   | tweety homolog 3 (Drosophila)                                  |
| 1,128182137 | 0,16175 | 1,144724161 | 0,01125 | TUB     | tubby homolog (mouse)                                          |
| 1,225185332 | 0,06795 | 1,159899655 | 0,03901 | TUB     | tubby homolog (mouse)                                          |
| 0,733058379 | 0,05159 | 0,753667455 | 0,00058 | TUBA1A  | tubulin, alpha 1a                                              |
| 0,725476104 | 0,08918 | 0,897510051 | 0,04039 | TUBA1C  | tubulin, alpha 1c                                              |
| 1,052631155 | 0,50197 | 1,158292806 | 0,00073 | TUBB1   | tubulin, beta 1                                                |
| 1,402499251 | 0,05197 | 1,234562607 | 0,0018  | TUBB1   | tubulin, beta 1                                                |
| 0,573553512 | 0,05657 | 0,792234811 | 0,01534 | TUBB2C  | tubulin, beta 2C                                               |
| 0,659296807 | 0,05083 | 0,793883931 | 0,00944 | TUBB2C  | tubulin, beta 2C                                               |
| 0,514770042 | 0,05382 | 0,765248385 | 0,01167 | TUBB3   | tubulin, beta 3                                                |
| 0,839731493 | 0,2574  | 0,800514811 | 0,01286 | TUBB6   | tubulin, beta 6                                                |
| 0,994470169 | 0,98224 | 0,767905135 | 0,02342 | TUBE1   | tubulin, epsilon 1                                             |
| 1,043188594 | 0,73484 | 1,132883885 | 0,03745 | TUBG2   | tubulin, gamma 2                                               |
| 1,056285625 | 0,58169 | 0,87175824  | 0,0258  | TUBGCP2 | tubulin, gamma complex associated protein 2                    |
| 0,799960128 | 0,21559 | 0,77916458  | 0,00144 | TUBGCP3 | tubulin, gamma complex associated protein 3                    |
| 0,700763725 | 0,13763 | 0,833353207 | 0,00963 | TUBGCP4 | tubulin, gamma complex associated protein 4                    |
| 0,925946023 | 0,56167 | 0,831045862 | 0,00505 | TUBGCP5 | tubulin, gamma complex associated protein 5                    |
| 1,139183377 | 0,47319 | 1,278985581 | 0,0108  | TUBGCP6 | tubulin, gamma complex associated protein 6                    |
| 0,933032992 | 0,50606 | 0,883315051 | 0,04258 | TUFM    | Tu translation elongation factor, mitochondrial                |
| 0,980779004 | 0,93323 | 0,758909626 | 0,00372 | TUG1    | taurine upregulated 1 (non-protein coding)                     |
| 1,074749173 | 0,5927  | 1,101141598 | 0,02382 | TUG1    | taurine upregulated 1 (non-protein coding)                     |
| 1,202469249 | 0,14307 | 1,200803427 | 0,00745 | TULP2   | tubby like protein 2                                           |
| 0,763129604 | 0,25769 | 0,839731493 | 0,00208 | TULP4   | tubby like protein 4                                           |
| 0,953959551 | 0,69074 | 0,813379198 | 0,00278 | TULP4   | tubby like protein 4                                           |
| 0,796640096 | 0,4868  | 0,504525817 | 0,00034 | TULP4   | tubby like protein 4                                           |
| 0,987600861 | 0,89737 | 0,843815796 | 0,00283 | TUSC1   | tumor suppressor candidate 1                                   |
| 1,344434994 | 0,0822  | 1,374588696 | 0,00205 | TUSC3   | tumor suppressor candidate 3                                   |
| 0,757333158 | 0,18162 | 0,68491649  | 0,00057 | TWF1    | twinfilin, actin-binding protein, homolog 1 (Drosophila)       |
| 0,467163673 | 0,15004 | 0,674551267 | 0,02683 | TWF1    | twinfilin, actin-binding protein, homolog 1 (Drosophila)       |
| 0,988970916 | 0,93316 | 0,837406488 | 0,00543 | TWF1    | twinfilin, actin-binding protein, homolog 1 (Drosophila)       |
| 0,988970916 | 0,90678 | 0,908778116 | 0,03665 | TWISTNB | TWIST neighbor                                                 |
| 0,97063447  | 0,86065 | 0,835087919 | 0,03314 | TWSG1   | twisted gastrulation homolog 1 (Drosophila)                    |
| 0,774855931 | 0,26068 | 0,76101669  | 0,00034 | TXLNG   | taxilin gamma                                                  |
| 1,085981856 | 0,54234 | 0,866937564 | 0,01983 | TXLNG2P | taxilin gamma 2, pseudogene                                    |
| 1,082224645 | 0,38427 | 1,147902414 | 0,00201 | TXNDC12 | thioredoxin domain containing 12 (endoplasmic reticulum)       |
| 0,792234811 | 0,27268 | 0,792234811 | 0,01168 | TXNDC16 | thioredoxin domain containing 16                               |
| 0,948026965 | 0,60642 | 1,257884972 | 0,00017 | TXNDC2  | thioredoxin domain containing 2 (spermatzoa)                   |
| 0,806641759 | 0,22786 | 0,719965659 | 0,00047 | TXNDC9  | thioredoxin domain containing 9                                |
| 0,773782497 | 0,16904 | 0,738669032 | 0,00005 | TXNDC9  | thioredoxin domain containing 9                                |
| 1,210833084 | 0,73532 | 1,374588696 | 0,00556 | TXNIP   | thioredoxin interacting protein                                |
| 1,56049096  | 0,25749 | 1,443929196 | 0,00048 | TXNIP   | thioredoxin interacting protein                                |
| 1,20664392  | 0,36173 | 1,473247686 | 0,0003  | TXNIP   | thioredoxin interacting protein                                |
| 0,963929808 | 0,75837 | 0,866336856 | 0,00112 | TXNL1   | thioredoxin-like 1                                             |
| 1,106497353 | 0,66706 | 0,736623843 | 0,00387 | TXNL1   | thioredoxin-like 1                                             |
| 0,929160674 | 0,4953  | 0,801069878 | 0,00033 | TXNL4A  | thioredoxin-like 4A                                            |
| 0,713012859 | 0,06858 | 0,875998315 | 0,00201 | TXNL4A  | thioredoxin-like 4A                                            |
| 1,186736798 | 0,09651 | 1,181811547 | 0,01482 | TXNL4B  | thioredoxin-like 4B                                            |
| 1,138394029 | 0,42023 | 1,28877463  | 0,0019  | TYK2    | tyrosine kinase 2                                              |
| 0,837406488 | 0,15413 | 0,759435845 | 0,00027 | TYMS    | thymidylate synthetase                                         |
| 1,215792823 | 0,15861 | 1,466116757 | 0,00093 | TYROBP  | TYRO protein tyrosine kinase binding protein                   |
| 0,934975198 | 0,5061  | 0,819604608 | 0,00195 | TYW5    | tRNA-yW synthesizing protein 5                                 |
| 0,954621014 | 0,65738 | 0,847919965 | 0,00326 | TYW5    | tRNA-yW synthesizing protein 5                                 |
| 0,708087719 | 0,08762 | 0,810003474 | 0,02884 | U2AF1   | U2 small nuclear RNA auxiliary factor 1                        |
| 1,059952783 | 0,66715 | 1,210833084 | 0,00279 | U2AF1L4 | U2 small nuclear RNA auxiliary factor 1-like 4                 |
| 0,798851916 | 0,20332 | 0,802181166 | 0,0187  | U2SURP  | U2 snRNP-associated SURP domain containing                     |
| 0,951977908 | 0,83639 | 0,70027816  | 0,00661 | U2SURP  | U2 snRNP-associated SURP domain containing                     |
| 0,725476104 | 0,09337 | 0,855002178 | 0,01502 | UACA    | uveal autoantigen with coiled-coil domains and ankyrin repeats |
| 1,074004472 | 0,70598 | 0,831622098 | 0,03628 | UACA    | uveal autoantigen with coiled-coil domains and ankyrin repeats |
| 0,832775771 | 0,26192 | 0,723969086 | 0,00102 | UBA2    | ubiquitin-like modifier activating enzyme 2                    |
| 0,902500727 | 0,59305 | 0,844986384 | 0,00769 | UBA3    | ubiquitin-like modifier activating enzyme 3                    |
| 0,8962667   | 0,41708 | 0,885153765 | 0,01916 | UBA5    | ubiquitin-like modifier activating enzyme 5                    |
| 1,197478705 | 0,14546 | 0,882091365 | 0,04642 | UBA6    | ubiquitin-like modifier activating enzyme 6                    |
| 1,161508732 | 0,0985  | 1,165541198 | 0,02274 | UBA6    | ubiquitin-like modifier activating enzyme 6                    |
| 0,966606097 | 0,92248 | 0,847332435 | 0,03902 | UBA6    | ubiquitin-like modifier activating enzyme 6                    |
| 0,886381699 | 0,44019 | 0,841479482 | 0,01323 | UBA6    | ubiquitin-like modifier activating enzyme 6                    |
| 0,787853886 | 0,29972 | 0,792234811 | 0,01029 | UBA6    | ubiquitin-like modifier activating enzyme 6                    |
| 1,257884972 | 0,16983 | 1,309485423 | 0,00023 | UBA7    | ubiquitin-like modifier activating enzyme 7                    |
| 0,977385766 | 0,93611 | 1,195819797 | 0,03357 | UBA7    | ubiquitin-like modifier activating enzyme 7                    |
| 0,877821798 | 0,23211 | 0,867538687 | 0,02269 | UBAP1   | ubiquitin associated protein 1                                 |
| 1,108800644 | 0,26677 | 1,112650121 | 0,03879 | UBAP1L  | ubiquitin associated protein 1-like                            |
| 0,865736566 | 0,34838 | 0,854409741 | 0,01298 | UBAP2L  | ubiquitin associated protein 2-like                            |
| 0,857376037 | 0,32033 | 0,841479482 | 0,00042 | UBE2A   | ubiquitin-conjugating enzyme E2A                               |
| 0,807201075 | 0,2916  | 0,805524291 | 0,00081 | UBE2B   | ubiquitin-conjugating enzyme E2B                               |
| 0,846158597 | 0,13069 | 0,863938187 | 0,02275 | UBE2B   | ubiquitin-conjugating enzyme E2B                               |
| 0,85027416  | 0,41435 | 0,78024548  | 0,00702 | UBE2B   | ubiquitin-conjugating enzyme E2B                               |
| 1,056285625 | 0,46286 | 1,107264584 | 0,00423 | UBE2B   | ubiquitin-conjugating enzyme E2B                               |
| 0,832198735 | 0,52368 | 0,657927263 | 0,0029  | UBE2B   | ubiquitin-conjugating enzyme E2B                               |
| 0,884540435 | 0,31977 | 0,868140228 | 0,00423 | UBE2D2  | ubiquitin-conjugating enzyme E2D 2                             |
| 0,925304428 | 0,75393 | 0,758909626 | 0,00103 | UBE2D2  | ubiquitin-conjugating enzyme E2D 2                             |
| 0,77916458  | 0,13395 | 0,833353207 | 0,01251 | UBE2D3  | ubiquitin-conjugating enzyme E2D 3                             |
| 1,128964405 | 0,24575 | 1,171210181 | 0,01175 | UBE2D4  | ubiquitin-conjugating enzyme E2D 4 (putative)                  |
| 1,091263877 | 0,31226 | 1,142346247 | 0,02701 | UBE2D4  | ubiquitin-conjugating enzyme E2D 4 (putative)                  |
| 0,937571096 | 0,65913 | 0,840313752 | 0,01661 | UBE2E1  | ubiquitin-conjugating enzyme E2E 1                             |
| 0,792234811 | 0,17565 | 0,720464874 | 0,00012 | UBE2E2  | ubiquitin-conjugating enzyme E2E 2                             |
| 0,851453708 | 0,19048 | 0,77916458  | 0,00681 | UBE2G1  | ubiquitin-conjugating enzyme E2G 1                             |
| 0,837987135 | 0,11441 | 0,777546036 | 0,01184 | UBE2G1  | ubiquitin-conjugating enzyme E2G 1                             |
| 0,69495911  | 0,06281 | 0,855595026 | 0,04096 | UBE2G1  | ubiquitin-conjugating enzyme E2G 1                             |
| 0,959264119 | 0,71015 | 1,136029265 | 0,04344 | UBE2G2  | ubiquitin-conjugating enzyme E2G 2                             |
| 0,931740429 | 0,76031 | 0,776468875 | 0,02935 | UBE2H   | ubiquitin-conjugating enzyme E2H                               |
| 0,632439771 | 0,14904 | 1,108032348 | 0,01034 | UBE2H   | ubiquitin-conjugating enzyme E2H                               |
| 0,835666959 | 0,24798 | 0,856188285 | 0,03953 | UBE2I   | ubiquitin-conjugating enzyme E2I                               |
| 0,97329374  | 0,86276 | 0,81056512  | 0,0274  | UBE2K   | ubiquitin-conjugating enzyme E2K                               |
| 0,670821112 | 0,15312 | 0,851453708 | 0,00951 | UBE2L3  | ubiquitin-conjugating enzyme E2L 3                             |



|             |         |             |         |           |                                                                   |
|-------------|---------|-------------|---------|-----------|-------------------------------------------------------------------|
| 1,153485605 | 0,28402 | 1,147107024 | 0,04894 | UBE2L6    | ubiquitin-conjugating enzyme E2L 6                                |
| 0,851453708 | 0,17128 | 0,845572287 | 0,01028 | UBE2N     | ubiquitin-conjugating enzyme E2N                                  |
| 0,85797053  | 0,50864 | 0,751059963 | 0,01434 | UBE2N     | ubiquitin-conjugating enzyme E2N                                  |
| 1,183451022 | 0,07797 | 1,178539408 | 0,00181 | UBE2O     | ubiquitin-conjugating enzyme E2O                                  |
| 1,135242102 | 0,40324 | 1,199139914 | 0,04221 | UBE2O     | ubiquitin-conjugating enzyme E2O                                  |
| 0,870550563 | 0,22353 | 0,790041312 | 0,00098 | UBE2Q1    | ubiquitin-conjugating enzyme E2Q family member 1                  |
| 0,891928519 | 0,61585 | 0,825305409 | 0,00143 | UBE2Q2    | ubiquitin-conjugating enzyme E2Q family member 2                  |
| 1,031683179 | 0,76898 | 1,142346247 | 0,00958 | UBE2Z     | ubiquitin-conjugating enzyme E2Z                                  |
| 0,893785162 | 0,45595 | 0,729004689 | 0,00073 | UBE2Z     | ubiquitin-conjugating enzyme E2Z                                  |
| 1,086734863 | 0,80857 | 0,829894586 | 0,00099 | UBE3A     | ubiquitin protein ligase E3A                                      |
| 0,934327347 | 0,61667 | 0,802737389 | 0,00302 | UBE3A     | ubiquitin protein ligase E3A                                      |
| 0,757858283 | 0,19444 | 0,758383773 | 0,00045 | UBE3A     | ubiquitin protein ligase E3A                                      |
| 0,934975198 | 0,73994 | 0,835087919 | 0,03559 | UBE3A     | ubiquitin protein ligase E3A                                      |
| 0,829319546 | 0,26111 | 0,826450318 | 0,00069 | UBE3B     | ubiquitin protein ligase E3B                                      |
| 1,00765376  | 0,97149 | 0,762072415 | 0,00128 | UBE3B     | ubiquitin protein ligase E3B                                      |
| 0,864537231 | 0,22439 | 0,777007269 | 0,00098 | UBE3B     | ubiquitin protein ligase E3B                                      |
| 0,984866443 | 0,84978 | 0,908778116 | 0,04059 | UBE3C     | ubiquitin protein ligase E3C                                      |
| 0,921464186 | 0,32643 | 0,848507902 | 0,00966 | UBE3C     | ubiquitin protein ligase E3C                                      |
| 1,125838586 | 0,26944 | 1,159095952 | 0,01434 | UBIAD1    | UbiA prenyltransferase domain containing 1                        |
| 0,85086373  | 0,33988 | 0,828744904 | 0,03818 | UBL3      | ubiquitin-like 3                                                  |
| 0,817335328 | 0,31413 | 0,79774524  | 0,01181 | UBL3      | ubiquitin-like 3                                                  |
| 0,965936329 | 0,70594 | 1,127834949 | 0,0056  | UBL4B     | ubiquitin-like 4B                                                 |
| 0,949342121 | 0,79803 | 1,175276328 | 0,00728 | UBL7      | ubiquitin-like 7 (bone marrow stromal cell-derived)               |
| 0,744322628 | 0,08216 | 0,733566672 | 0,00003 | UBN1      | ubiquitin 1                                                       |
| 0,919550046 | 0,63894 | 0,860352631 | 0,0126  | UBN2      | ubiquitin 2                                                       |
| 0,724471077 | 0,16057 | 0,680657058 | 0       | UBN2      | ubiquitin 2                                                       |
| 1,051172909 | 0,49992 | 1,155886707 | 0,00924 | UBOX5     | U-box domain containing 5                                         |
| 0,854409741 | 0,48647 | 0,819604608 | 0,00508 | UBP1      | upstream binding protein 1 (LBP-19)                               |
| 0,816768991 | 0,12073 | 0,785128119 | 0,00524 | UBQLN1    | ubiquilin 1                                                       |
| 0,821310701 | 0,32153 | 0,87417862  | 0,01266 | UBQLN1    | ubiquilin 1                                                       |
| 0,946057647 | 0,74658 | 0,825305409 | 0,00041 | UBQLN1    | ubiquilin 1                                                       |
| 1,018891197 | 0,91268 | 0,853817714 | 0,00431 | UBQLN2    | ubiquilin 2                                                       |
| 1,172022284 | 0,0919  | 1,114193651 | 0,02124 | UBQLN3    | ubiquilin 3                                                       |
| 1,000693387 | 0,99848 | 0,854409741 | 0,02169 | UBR1      | ubiquitin protein ligase E3 component n-recognin 1                |
| 0,966606097 | 0,75992 | 1,22603486  | 0,01421 | UBR1      | ubiquitin protein ligase E3 component n-recognin 1                |
| 0,898132373 | 0,50539 | 0,868140228 | 0,02741 | UBR2      | ubiquitin protein ligase E3 component n-recognin 2                |
| 0,738157203 | 0,26544 | 0,671286251 | 0,00002 | UBR3      | ubiquitin protein ligase E3 component n-recognin 3 (putative)     |
| 0,69399636  | 0,06996 | 0,676424116 | 0,00166 | UBR3      | ubiquitin protein ligase E3 component n-recognin 3 (putative)     |
| 0,96996191  | 0,75744 | 0,905633983 | 0,02214 | UBR3      | ubiquitin protein ligase E3 component n-recognin 3 (putative)     |
| 0,882091365 | 0,09754 | 0,862741345 | 0,01279 | UBR4      | ubiquitin protein ligase E3 component n-recognin 4                |
| 1,067325338 | 0,57415 | 1,178539408 | 0,03791 | UBR4      | ubiquitin protein ligase E3 component n-recognin 4                |
| 0,778624691 | 0,2513  | 0,862741345 | 0,04383 | UBR5      | ubiquitin protein ligase E3 component n-recognin 5                |
| 0,878430468 | 0,54937 | 0,765778999 | 0,01594 | UBR5      | ubiquitin protein ligase E3 component n-recognin 5                |
| 0,993781093 | 0,95412 | 0,846745312 | 0,0077  | UBR7      | ubiquitin protein ligase E3 component n-recognin 7 (putative)     |
| 0,891928519 | 0,58135 | 0,843815796 | 0,03067 | UBTD2     | ubiquitin domain containing 2                                     |
| 1,132883885 | 0,35894 | 1,30224419  | 0,02162 | UBXN11    | UBX domain protein 11                                             |
| 0,882702996 | 0,30698 | 0,834509281 | 0,01067 | UBXN2A    | UBX domain protein 2A                                             |
| 0,665264521 | 0,27165 | 0,76950361  | 0,00023 | UBXN4     | UBX domain protein 4                                              |
| 0,764718139 | 0,29489 | 0,757858283 | 0,04402 | UBXN6     | UBX domain protein 6                                              |
| 0,78132788  | 0,44114 | 0,752623374 | 0,00172 | UBXN7     | UBX domain protein 7                                              |
| 0,992404375 | 0,96738 | 0,84264683  | 0,0117  | UBXN8     | UBX domain protein 8                                              |
| 1,158292806 | 0,33465 | 1,151887642 | 0,02916 | UCA1      | urothelial cancer associated 1 (non-protein coding)               |
| 1,035982764 | 0,58662 | 1,251796459 | 0,00039 | UCHL1     | ubiquitin carboxyl-terminal esterase L1 (ubiquitin thiolesterase) |
| 1,071773463 | 0,58005 | 1,275444392 | 0,0007  | UCHL1     | ubiquitin carboxyl-terminal esterase L1 (ubiquitin thiolesterase) |
| 1,058484395 | 0,44198 | 1,178539408 | 0,00163 | UCHL5     | ubiquitin carboxyl-terminal hydrolase L5                          |
| 0,912565489 | 0,52271 | 0,762600827 | 0,01664 | UCHL5     | ubiquitin carboxyl-terminal hydrolase L5                          |
| 0,697371833 | 0,05335 | 0,735603373 | 0,00151 | UCHL5     | ubiquitin carboxyl-terminal hydrolase L5                          |
| 1,04608494  | 0,64736 | 1,121166078 | 0,01088 | UCP1      | uncoupling protein 1 (mitochondrial, proton carrier)              |
| 1,143930973 | 0,30231 | 1,178539408 | 0,0279  | UEVLD     | UEV and lactate/malate dehydrogenase domains                      |
| 0,71449707  | 0,11168 | 0,722465199 | 0,03317 | UEVLD     | UEV and lactate/malate dehydrogenase domains                      |
| 0,789493887 | 0,45555 | 0,725476104 | 0,00077 | UFL1      | UFM1-specific ligase 1                                            |
| 0,972654947 | 0,92664 | 0,798851916 | 0,01276 | UGCG      | UDP-glucose ceramide glucosyltransferase                          |
| 0,890075733 | 0,72752 | 0,727994774 | 0,02053 | UGCG      | UDP-glucose ceramide glucosyltransferase                          |
| 0,972654947 | 0,90687 | 0,852634892 | 0,00838 | UGDH      | UDP-glucose 6-dehydrogenase                                       |
| 1,066585781 | 0,48829 | 1,175276328 | 0,01389 | UGGT1     | UDP-glucose glycoprotein glucosyltransferase 1                    |
| 0,681601304 | 0,14832 | 0,808320869 | 0,00976 | UGP2      | UDP-glucose pyrophosphorylase 2                                   |
| 1,248330549 | 0,11934 | 1,223488041 | 0,02057 | UGT8      | UDP glycosyltransferase 8                                         |
| 0,950659101 | 0,88572 | 0,577943353 | 0,00006 | UHMK1     | U2AF homology motif (UHM) kinase 1                                |
| 0,752101876 | 0,37034 | 0,564873607 | 0,00097 | UHMK1     | U2AF homology motif (UHM) kinase 1                                |
| 0,995849753 | 0,98498 | 0,777007269 | 0,00279 | UHRF1     | ubiquitin-like with PHD and ring finger domains 1                 |
| 1,003471749 | 0,98291 | 0,877821798 | 0,0096  | UHRF1BP1  | UHRF1 binding protein 1                                           |
| 0,719965659 | 0,13967 | 0,688725023 | 0,00109 | UHRF1BP1L | UHRF1 binding protein 1-like                                      |
| 0,677832163 | 0,0529  | 0,723969086 | 0,00049 | ULBP2     | UL16 binding protein 2                                            |
| 0,898132373 | 0,44979 | 0,8962667   | 0,03819 | ULBP3     | UL16 binding protein 3                                            |
| 0,897510051 | 0,30859 | 0,881480158 | 0,04807 | UMPS      | uridine monophosphate synthetase                                  |
| 0,749499801 | 0,09377 | 0,81735328  | 0,00504 | UNC5B     | unc-5 homolog B (C. elegans)                                      |
| 0,866336856 | 0,43766 | 0,750539549 | 0,00004 | UNC5B     | unc-5 homolog B (C. elegans)                                      |
| 1,154285418 | 0,16852 | 1,144724161 | 0,00696 | UNC5C     | unc-5 homolog C (C. elegans)                                      |
| 1,146312186 | 0,09504 | 1,243149669 | 0,00096 | UNC79     | unc-79 homolog (C. elegans)                                       |
| 0,935623498 | 0,441   | 0,87175824  | 0,0013  | UNC93A    | unc-93 homolog A (C. elegans)                                     |
| 1,309485423 | 0,05619 | 1,20163605  | 0,04021 | UNC93B1   | unc-93 homolog B1 (C. elegans)                                    |
| 1,28877463  | 0,1896  | 1,370782805 | 0,00049 | UNC93B1   | unc-93 homolog B1 (C. elegans)                                    |
| 0,915733686 | 0,60098 | 0,754190038 | 0,01662 | UNK       | unkempt homolog (Drosophila)                                      |
| 0,868742185 | 0,43718 | 0,844400887 | 0,01736 | UPF2      | UPF2 regulator of nonsense transcripts homolog (yeast)            |
| 0,750019495 | 0,07627 | 0,810003474 | 0,02382 | UPF3A     | UPF3 regulator of nonsense transcripts homolog A (yeast)          |
| 0,748980467 | 0,13272 | 0,768437591 | 0,00004 | UPF3A     | UPF3 regulator of nonsense transcripts homolog A (yeast)          |
| 0,654742712 | 0,10505 | 0,812815602 | 0,00324 | UPF3B     | UPF3 regulator of nonsense transcripts homolog B (yeast)          |
| 1,026689546 | 0,79054 | 1,149494848 | 0,00822 | UQCR11    | ubiquinol-cytochrome c reductase, complex III subunit XI          |
| 0,682546859 | 0,05818 | 0,898755127 | 0,00667 | UQCRB     | ubiquinol-cytochrome c reductase binding protein                  |
| 0,90000193  | 0,60644 | 0,811689581 | 0,04355 | UQCRB     | ubiquinol-cytochrome c reductase binding protein                  |
| 0,765778999 | 0,31753 | 0,688247801 | 0,0062  | UQCRC2    | ubiquinol-cytochrome c reductase core protein II                  |
| 1,082975046 | 0,63011 | 1,227735684 | 0,00067 | URM1      | ubiquitin related modifier 1                                      |
| 0,944747041 | 0,7293  | 1,160703914 | 0,03061 | UROS      | uroporphyrinogen III synthase                                     |
| 0,833931044 | 0,15977 | 0,839149637 | 0,02681 | USE1      | unconventional SNARE in the ER 1 homolog (S. cerevisiae)          |
| 1,161508732 | 0,24289 | 1,195819797 | 0,01442 | USF2      | upstream transcription factor 2, c-fos interacting                |
| 1,148698355 | 0,14203 | 1,216722359 | 0,00133 | USH1C     | Usher syndrome 1C (autosomal recessive, severe)                   |
| 0,930449658 | 0,52166 | 0,886381699 | 0,00428 | USMG5     | up-regulated during skeletal muscle growth 5 homolog (mouse)      |
| 0,8962667   | 0,44434 | 0,842062954 | 0,02704 | USO1      | USO1 vesicle docking protein homolog (yeast)                      |
| 0,678302164 | 0,21249 | 0,660669203 | 0,0003  | USP1      | ubiquitin specific peptidase 1                                    |
| 0,724973416 | 0,10407 | 0,706127202 | 0,00026 | USP1      | ubiquitin specific peptidase 1                                    |
| 0,858565436 | 0,35762 | 0,832198735 | 0,00006 | USP10     | ubiquitin specific peptidase 10                                   |
| 1,021720083 | 0,92344 | 1,191682575 | 0,01305 | USP11     | ubiquitin specific peptidase 11                                   |
| 1,151887642 | 0,40114 | 1,179356592 | 0,01932 | USP13     | ubiquitin specific peptidase 13 (isopeptidase T-3)                |
| 1,198309021 | 0,05867 | 1,215036792 | 0,00705 | USP13     | ubiquitin specific peptidase 13 (isopeptidase T-3)                |

|             |         |             |         |        |                                                                         |
|-------------|---------|-------------|---------|--------|-------------------------------------------------------------------------|
| 0,790041312 | 0,34844 | 0,847332435 | 0,01281 | USP14  | ubiquitin specific peptidase 14 (tRNA-guanine transglycosylase)         |
| 0,839731493 | 0,17352 | 0,819036698 | 0,00253 | USP14  | ubiquitin specific peptidase 14 (tRNA-guanine transglycosylase)         |
| 0,740206649 | 0,0698  | 0,786762445 | 0       | USP14  | ubiquitin specific peptidase 14 (tRNA-guanine transglycosylase)         |
| 0,691595315 | 0,08402 | 0,804966138 | 0,01151 | USP15  | ubiquitin specific peptidase 15                                         |
| 0,847919965 | 0,25451 | 0,813379198 | 0,03795 | USP15  | ubiquitin specific peptidase 15                                         |
| 0,782954296 | 0,15404 | 0,781869643 | 0,00002 | USP16  | ubiquitin specific peptidase 16                                         |
| 0,76950361  | 0,44902 | 0,788946841 | 0,00003 | USP16  | ubiquitin specific peptidase 16                                         |
| 0,811689581 | 0,22409 | 0,791685866 | 0,00001 | USP16  | ubiquitin specific peptidase 16                                         |
| 0,942784536 | 0,52152 | 0,890692901 | 0,04254 | USP2   | ubiquitin specific peptidase 2                                          |
| 1,077733145 | 0,27559 | 1,118061851 | 0,02439 | USP24  | ubiquitin specific peptidase 24                                         |
| 0,8962667   | 0,64871 | 0,758383773 | 0,02752 | USP25  | ubiquitin specific peptidase 25                                         |
| 0,704172113 | 0,07842 | 0,727994774 | 0,00087 | USP25  | ubiquitin specific peptidase 25                                         |
| 0,922742493 | 0,66323 | 0,780786493 | 0,02135 | USP30  | ubiquitin specific peptidase 30                                         |
| 0,827023368 | 0,19942 | 0,837987135 | 0,02851 | USP31  | ubiquitin specific peptidase 31                                         |
| 0,779704843 | 0,05246 | 0,747424624 | 0,00105 | USP31  | ubiquitin specific peptidase 31                                         |
| 0,73153561  | 0,36696 | 0,709070018 | 0,0006  | USP31  | ubiquitin specific peptidase 31                                         |
| 0,683493726 | 0,15546 | 0,755759964 | 0,0074  | USP31  | ubiquitin specific peptidase 31                                         |
| 0,784040454 | 0,06376 | 0,856781955 | 0,02195 | USP32  | ubiquitin specific peptidase 32                                         |
| 0,798851916 | 0,10879 | 0,883315051 | 0,02848 | USP33  | ubiquitin specific peptidase 33                                         |
| 0,945402117 | 0,79613 | 0,835666959 | 0,02338 | USP33  | ubiquitin specific peptidase 33                                         |
| 0,69640574  | 0,05064 | 0,813943185 | 0,00279 | USP34  | ubiquitin specific peptidase 34                                         |
| 0,747424624 | 0,05449 | 0,824733549 | 0,00839 | USP34  | ubiquitin specific peptidase 34                                         |
| 0,710053679 | 0,31245 | 0,76101669  | 0,00097 | USP34  | ubiquitin specific peptidase 34                                         |
| 0,872362706 | 0,30921 | 0,808881348 | 0,01358 | USP36  | ubiquitin specific peptidase 36                                         |
| 0,76684133  | 0,11181 | 0,813943185 | 0,04444 | USP37  | ubiquitin specific peptidase 37                                         |
| 0,724973416 | 0,2151  | 0,684441907 | 0,00061 | USP38  | ubiquitin specific peptidase 38                                         |
| 0,799960128 | 0,208   | 0,76101669  | 0,01777 | USP38  | ubiquitin specific peptidase 38                                         |
| 1,064370182 | 0,36777 | 1,163926534 | 0,012   | USP4   | ubiquitin specific peptidase 4 (proto-oncogene)                         |
| 0,924663278 | 0,51544 | 1,157490217 | 0,03118 | USP40  | ubiquitin specific peptidase 40                                         |
| 0,833931044 | 0,26118 | 0,759435845 | 0,00724 | USP42  | ubiquitin specific peptidase 42                                         |
| 0,907519155 | 0,57521 | 0,672683604 | 0,00013 | USP43  | ubiquitin specific peptidase 43                                         |
| 0,853226098 | 0,46292 | 0,688247801 | 0,00926 | USP46  | ubiquitin specific peptidase 46                                         |
| 0,809442217 | 0,41692 | 0,729510172 | 0,02647 | USP46  | ubiquitin specific peptidase 46                                         |
| 1,123499903 | 0,27264 | 1,127400412 | 0,04673 | USP46  | ubiquitin specific peptidase 46                                         |
| 0,927873476 | 0,50642 | 0,784584098 | 0,0004  | USP46  | ubiquitin specific peptidase 46                                         |
| 0,715984371 | 0,12882 | 0,784040454 | 0,00012 | USP47  | ubiquitin specific peptidase 47                                         |
| 0,907519155 | 0,60926 | 0,839149637 | 0,00506 | USP47  | ubiquitin specific peptidase 47                                         |
| 0,630251696 | 0,13304 | 0,735603373 | 0,00218 | USP47  | ubiquitin specific peptidase 47                                         |
| 1,181811547 | 0,22811 | 1,153485605 | 0,02259 | USP48  | ubiquitin specific peptidase 48                                         |
| 0,648869383 | 0,17418 | 0,575943821 | 0,00011 | USP53  | ubiquitin specific peptidase 53                                         |
| 0,681129017 | 0,13094 | 0,619424349 | 0,00026 | USP53  | ubiquitin specific peptidase 53                                         |
| 1,059952783 | 0,49805 | 1,423063461 | 0,00023 | USP6   | ubiquitin specific peptidase 6 (Tre-2 oncogene)                         |
| 0,901250463 | 0,57111 | 0,754190038 | 0,02143 | USP6NL | USP6 N-terminal like                                                    |
| 0,748980467 | 0,09495 | 0,76101669  | 0,0004  | USP7   | ubiquitin specific peptidase 7 (herpes virus-associated)                |
| 1,083725967 | 0,50903 | 0,794985251 | 0,03426 | USP7   | ubiquitin specific peptidase 7 (herpes virus-associated)                |
| 0,846745312 | 0,35903 | 0,872362706 | 0,00812 | USP8   | ubiquitin specific peptidase 8                                          |
| 0,764718139 | 0,22805 | 0,823020345 | 0,01528 | USP9X  | ubiquitin specific peptidase 9, X-linked                                |
| 0,989656656 | 0,95512 | 0,853226098 | 0,02174 | USP9X  | ubiquitin specific peptidase 9, X-linked                                |
| 1,118837101 | 0,61733 | 0,690158677 | 0,04515 | USP9Y  | ubiquitin specific peptidase 9, Y-linked                                |
| 0,946713631 | 0,73869 | 0,788946841 | 0,02053 | USP9Y  | ubiquitin specific peptidase 9, Y-linked                                |
| 0,978063473 | 0,79649 | 0,862143545 | 0,00653 | USP11  | ubiquitin specific peptidase like 1                                     |
| 0,894404902 | 0,60566 | 0,821880187 | 0,02754 | UST    | uronyl-2-sulfotransferase                                               |
| 0,992404375 | 0,90599 | 1,094293701 | 0,0396  | UTP11L | UTP11-like, U3 small nucleolar ribonucleoprotein, (yeast)               |
| 0,765248385 | 0,09382 | 0,685391402 | 0,00004 | UTP15  | UTP15, U3 small nucleolar ribonucleoprotein, homolog (S. cerevisiae)    |
| 0,820741609 | 0,26528 | 0,821310701 | 0,00099 | UTP23  | UTP23, small subunit (SSU) processome component, homolog (yeast)        |
| 0,815072332 | 0,22155 | 0,729004689 | 0,00136 | UTP23  | UTP23, small subunit (SSU) processome component, homolog (yeast)        |
| 0,783497187 | 0,12956 | 0,813379198 | 0,04864 | UTP23  | UTP23, small subunit (SSU) processome component, homolog (yeast)        |
| 0,727994774 | 0,05586 | 0,771105413 | 0,00001 | UTP3   | UTP3, small subunit (SSU) processome component, homolog (S. cerevisiae) |
| 0,753145233 | 0,05959 | 0,910669834 | 0,01529 | UTP6   | UTP6, small subunit (SSU) processome component, homolog (yeast)         |
| 0,841479482 | 0,28822 | 0,869947353 | 0,0315  | UTRN   | utrophin                                                                |
| 1,034547582 | 0,74867 | 1,151887642 | 0,01    | UTS2R  | utrotensin 2 receptor                                                   |
| 0,827023368 | 0,13333 | 0,788946841 | 0,00185 | UTY    | ubiquitously transcribed tetratricopeptide repeat gene, Y-linked        |
| 0,957271458 | 0,76428 | 0,875998315 | 0,0226  | UXS1   | UDP-glucuronate decarboxylase 1                                         |
| 1,187559666 | 0,07614 | 1,119612889 | 0,01939 | VAMP1  | vesicle-associated membrane protein 1 (synaptobrevin 1)                 |
| 0,892546971 | 0,50225 | 0,880869374 | 0,04142 | VAMP4  | vesicle-associated membrane protein 4                                   |
| 1,123499903 | 0,60234 | 1,236275261 | 0,00106 | VAMP5  | vesicle-associated membrane protein 5 (myobrevin)                       |
| 0,829319546 | 0,17776 | 0,829894586 | 0,01692 | VANGL1 | vang-like 1 (van gogh, Drosophila)                                      |
| 0,785128119 | 0,24373 | 0,783497187 | 0,00017 | VANGL1 | vang-like 1 (van gogh, Drosophila)                                      |
| 0,954621014 | 0,8411  | 0,751580739 | 0,00075 | VANGL1 | vang-like 1 (van gogh, Drosophila)                                      |
| 0,793883931 | 0,10835 | 0,747424624 | 0,00368 | VAPA   | VAMP (vesicle-associated membrane protein)-associated protein A, 33kDa  |
| 0,84552287  | 0,3881  | 0,837406488 | 0,0169  | VAPA   | VAMP (vesicle-associated membrane protein)-associated protein A, 33kDa  |
| 0,781869643 | 0,1473  | 0,875998315 | 0,01453 | VAPB   | VAMP (vesicle-associated membrane protein)-associated protein B and C   |
| 0,802737389 | 0,23881 | 0,825305409 | 0,00071 | VAPB   | VAMP (vesicle-associated membrane protein)-associated protein B and C   |
| 1,258757174 | 0,07484 | 1,224336392 | 0,0159  | VASH1  | vasohibin 1                                                             |
| 1,17609125  | 0,19467 | 1,115739322 | 0,03555 | VASH1  | vasohibin 1                                                             |
| 1,101141598 | 0,30782 | 1,109569472 | 0,03275 | VASH2  | vasohibin 2                                                             |
| 1,301341855 | 0,05051 | 1,16634937  | 0,03149 | VAT1L  | vesicle amine transport protein 1 homolog (T. californica)-like         |
| 1,263127262 | 0,0656  | 1,194163187 | 0,01169 | VAV2   | vav 2 guanine nucleotide exchange factor                                |
| 1,426025717 | 0,12832 | 1,418140036 | 0,0091  | VCAM1  | vascular cell adhesion molecule 1                                       |
| 1,715941061 | 0,05298 | 1,860899315 | 0,0033  | VCAN   | versican                                                                |
| 1,256142381 | 0,18025 | 1,823866331 | 0,00339 | VCAN   | versican                                                                |
| 1,320422841 | 0,53988 | 1,917198877 | 0,01709 | VCAN   | versican                                                                |
| 1,732673713 | 0,30693 | 1,991699506 | 0,0102  | VCAN   | versican                                                                |
| 1,235418637 | 0,17871 | 1,777685362 | 0,0051  | VCAN   | versican                                                                |
| 0,804408371 | 0,09413 | 0,883927531 | 0,03691 | VCL    | vinculin                                                                |
| 1,02313747  | 0,7844  | 1,141554707 | 0,00887 | VCPIP1 | valosin containing protein (p97)/p47 complex interacting protein 1      |
| 1,20664392  | 0,33468 | 0,855595026 | 0,02893 | VCPIP1 | valosin containing protein (p97)/p47 complex interacting protein 1      |
| 1,087488391 | 0,47563 | 1,131314463 | 0,00665 | VX2    | variable charge, X-linked 2                                             |
| 0,739693755 | 0,17417 | 0,806082831 | 0,00037 | VDAC1  | voltage-dependent anion channel 1                                       |
| 0,797192477 | 0,58029 | 0,792234811 | 0,04677 | VDAC1  | voltage-dependent anion channel 1                                       |
| 0,857376037 | 0,30562 | 0,857376037 | 0,00396 | VDAC3  | voltage-dependent anion channel 3                                       |
| 0,579146403 | 0,11688 | 0,823020345 | 0,00872 | VDAC3  | voltage-dependent anion channel 3                                       |
| 0,991716731 | 0,96272 | 1,331451613 | 0,00023 | VEGFA  | vascular endothelial growth factor A                                    |
| 1,125058485 | 0,20213 | 1,133669413 | 0,02027 | VENTX  | VENT homeobox                                                           |
| 0,783497187 | 0,12619 | 0,869947353 | 0,00928 | VEZF1  | vascular endothelial zinc finger 1                                      |
| 0,797192477 | 0,43798 | 0,741233505 | 0,0053  | VEZT   | vezatin, adherens junctions transmembrane protein                       |
| 0,840313752 | 0,41873 | 0,78024548  | 0,00015 | VEZT   | vezatin, adherens junctions transmembrane protein                       |
| 0,729510172 | 0,13216 | 0,7944344   | 0,00042 | VEZT   | vezatin, adherens junctions transmembrane protein                       |
| 0,996540263 | 0,97612 | 1,159095952 | 0,02772 | VGLL1  | vestigial like 1 (Drosophila)                                           |
| 0,945402117 | 0,58493 | 1,178539408 | 0,00213 | VILL1  | villin 1                                                                |
| 1,163926534 | 0,18201 | 1,243149669 | 0,00117 | VILL   | villin-like                                                             |
| 1,07997656  | 0,86172 | 1,300440147 | 0,03196 | VIM    | vimentin                                                                |
| 1,167967395 | 0,34293 | 1,337927555 | 0,00021 | VKORC1 | vitamin K epoxide reductase complex, subunit 1                          |
| 1,256142381 | 0,11333 | 1,391846392 | 0,00033 | VMO1   | vitelline membrane outer layer 1 homolog (chicken)                      |

|             |         |             |         |         |                                                                        |
|-------------|---------|-------------|---------|---------|------------------------------------------------------------------------|
| 0,917639882 | 0,70605 | 0,814507563 | 0,04496 | VPS13A  | vacuolar protein sorting 13 homolog A (S. cerevisiae)                  |
| 0,986232704 | 0,88009 | 0,816768991 | 0,0006  | VPS13A  | vacuolar protein sorting 13 homolog A (S. cerevisiae)                  |
| 0,771640088 | 0,25082 | 0,849684999 | 0,00304 | VPS13A  | vacuolar protein sorting 13 homolog A (S. cerevisiae)                  |
| 0,936921447 | 0,37942 | 0,825305409 | 0,00768 | VPS13A  | vacuolar protein sorting 13 homolog A (S. cerevisiae)                  |
| 0,791685866 | 0,2499  | 0,730522189 | 0,00047 | VPS13B  | vacuolar protein sorting 13 homolog B (yeast)                          |
| 0,763658749 | 0,19679 | 0,701735863 | 0,00023 | VPS13B  | vacuolar protein sorting 13 homolog B (yeast)                          |
| 0,728499557 | 0,09047 | 0,740719899 | 0,01368 | VPS13D  | vacuolar protein sorting 13 homolog D (S. cerevisiae)                  |
| 1,155886707 | 0,25814 | 1,151089491 | 0,02416 | VPS18   | vacuolar protein sorting 18 homolog (S. cerevisiae)                    |
| 1,340712592 | 0,05682 | 1,375541818 | 0,00061 | VPS18   | vacuolar protein sorting 18 homolog (S. cerevisiae)                    |
| 0,976708529 | 0,84006 | 0,898755127 | 0,03379 | VPS26A  | vacuolar protein sorting 26 homolog A (S. pombe)                       |
| 1,048989328 | 0,6417  | 0,857376037 | 0,00807 | VPS33A  | vacuolar protein sorting 33 homolog A (S. cerevisiae)                  |
| 0,959929261 | 0,77925 | 0,884540435 | 0,01182 | VPS33B  | vacuolar protein sorting 33 homolog B (yeast)                          |
| 0,706127202 | 0,08817 | 0,768970416 | 0,00253 | VPS35   | vacuolar protein sorting 35 homolog (S. cerevisiae)                    |
| 0,807201075 | 0,2895  | 0,888226796 | 0,03809 | VPS36   | vacuolar protein sorting 36 homolog (S. cerevisiae)                    |
| 0,819604608 | 0,16773 | 0,779704843 | 0,01991 | VPS37A  | vacuolar protein sorting 37 homolog A (S. cerevisiae)                  |
| 0,775930854 | 0,2577  | 0,667111585 | 0,00063 | VPS37A  | vacuolar protein sorting 37 homolog A (S. cerevisiae)                  |
| 0,940826108 | 0,79121 | 1,234562607 | 0,00236 | VPS39   | vacuolar protein sorting 39 homolog (S. cerevisiae)                    |
| 0,681129017 | 0,1     | 0,605416542 | 0,00004 | VPS41   | vacuolar protein sorting 41 homolog (S. cerevisiae)                    |
| 1,041743429 | 0,57886 | 1,191682575 | 0,01579 | VPS45   | vacuolar protein sorting 45 homolog (S. cerevisiae)                    |
| 0,827596816 | 0,22466 | 0,751059963 | 0,00039 | VPS53   | vacuolar protein sorting 53 homolog (S. cerevisiae)                    |
| 0,734075318 | 0,08699 | 0,727490342 | 0,00023 | VPS54   | vacuolar protein sorting 54 homolog (S. cerevisiae)                    |
| 0,849096246 | 0,49754 | 0,771105413 | 0,00158 | VPS54   | vacuolar protein sorting 54 homolog (S. cerevisiae)                    |
| 0,52850902  | 0,08164 | 0,612592666 | 0,00021 | VPS8    | vacuolar protein sorting 8 homolog (S. cerevisiae)                     |
| 0,87539133  | 0,12551 | 0,816203046 | 0,02075 | VPS8    | vacuolar protein sorting 8 homolog (S. cerevisiae)                     |
| 0,855002178 | 0,39541 | 0,792784137 | 0,0002  | VRK1    | vaccinia related kinase 1                                              |
| 0,744322628 | 0,08064 | 0,764718139 | 0,00137 | VRK2    | vaccinia related kinase 2                                              |
| 0,888226796 | 0,47689 | 0,752623374 | 0,00825 | VRK2    | vaccinia related kinase 2                                              |
| 1,120389214 | 0,39332 | 1,294145654 | 0,00047 | VRK3    | vaccinia related kinase 3                                              |
| 1,026689546 | 0,73253 | 1,108800644 | 0,02343 | VSIG1   | V-set and immunoglobulin domain containing 1                           |
| 0,993092495 | 0,94888 | 0,832198735 | 0,03563 | VSIG10  | V-set and immunoglobulin domain containing 10                          |
| 0,853226098 | 0,3418  | 0,753145233 | 0,01546 | VSIG10  | V-set and immunoglobulin domain containing 10                          |
| 0,744838732 | 0,05623 | 0,798298386 | 0,02823 | VSIG10L | V-set and immunoglobulin domain containing 10 like                     |
| 1,21167266  | 0,28322 | 1,229438867 | 0,00687 | VSIG4   | V-set and immunoglobulin domain containing 4                           |
| 1,02313747  | 0,80239 | 1,095811766 | 0,03276 | VSTM4   | V-set and transmembrane domain containing 4                            |
| 1,051172909 | 0,63022 | 1,106497353 | 0,03439 | VSTM4   | V-set and transmembrane domain containing 4                            |
| 0,735093668 | 0,11455 | 0,69399636  | 0,01535 | VTA1    | Vps20-associated 1 homolog (S. cerevisiae)                             |
| 0,671751713 | 0,07291 | 0,696888619 | 0,00002 | VTA1    | Vps20-associated 1 homolog (S. cerevisiae)                             |
| 0,924022572 | 0,58975 | 0,835087919 | 0,03076 | VT11A   | vesicle transport through interaction with t-SNAREs homolog 1A (yeast) |
| 0,834509281 | 0,22786 | 0,775930854 | 0,00232 | VT11B   | vesicle transport through interaction with t-SNAREs homolog 1B (yeast) |
| 0,865736566 | 0,39586 | 0,755236293 | 0,01259 | VT11B   | vesicle transport through interaction with t-SNAREs homolog 1B (yeast) |
| 1,299539062 | 0,18265 | 0,378405153 | 0,01348 | VWA1    | von Willebrand factor A domain containing 1                            |
| 1,232852325 | 0,06202 | 1,244011653 | 0,003   | VWA1    | von Willebrand factor A domain containing 1                            |
| 0,999307093 | 0,99068 | 1,245737416 | 0,00087 | VWA3A   | von Willebrand factor A domain containing 3A                           |
| 0,920187651 | 0,43981 | 1,129747215 | 0,01981 | WVCE    | von Willebrand factor C and EGF domains                                |
| 1,638073396 | 0,06829 | 1,868654694 | 0       | WVF     | von Willebrand factor                                                  |
| 0,754712984 | 0,16617 | 0,858565436 | 0,02824 | WAC     | WW domain containing adaptor with coiled-coil                          |
| 1,000693387 | 0,9981  | 1,736113431 | 0,00076 | WAC     | WW domain containing adaptor with coiled-coil                          |
| 0,797192477 | 0,25879 | 0,805524291 | 0,00014 | WAPAL   | wings apart-like homolog (Drosophila)                                  |
| 1,512567997 | 0,09459 | 1,202469249 | 0,02231 | WARS    | tryptophanyl-tRNA synthetase                                           |
| 1,615521555 | 0,0796  | 1,270150983 | 0,00166 | WARS    | tryptophanyl-tRNA synthetase                                           |
| 0,783497187 | 0,10962 | 0,825305409 | 0,02232 | WARS2   | tryptophanyl tRNA synthetase 2, mitochondrial                          |
| 0,819604608 | 0,46693 | 0,755759964 | 0,00016 | WASF2   | WAS protein family, member 2                                           |
| 0,923382311 | 0,68353 | 0,805524291 | 0,0154  | WASF3   | WAS protein family, member 3                                           |
| 0,585199321 | 0,06477 | 0,50278029  | 0,00001 | WASL    | Wiskott-Aldrich syndrome-like                                          |
| 1,043911927 | 0,68665 | 0,873572896 | 0,01776 | WBP11   | WW domain binding protein 11                                           |
| 0,742261785 | 0,13666 | 0,62676651  | 0,00001 | WBP4    | WW domain binding protein 4 (formin binding protein 21)                |
| 0,867538687 | 0,4992  | 0,784040454 | 0,00252 | WBP4    | WW domain binding protein 4 (formin binding protein 21)                |
| 0,727490342 | 0,1144  | 0,774319028 | 0,01719 | WBP5    | WW domain binding protein 5                                            |
| 1,187559666 | 0,21238 | 1,246601194 | 0,0021  | WBSCR16 | Williams-Beuren syndrome chromosome region 16                          |
| 1,011853201 | 0,92549 | 0,832757771 | 0,00689 | WBSCR16 | Williams-Beuren syndrome chromosome region 16                          |
| 1,01395948  | 0,86663 | 1,099616149 | 0,04103 | WBSCR27 | Williams Beuren syndrome chromosome region 27                          |
| 0,927873476 | 0,69838 | 0,815637493 | 0,01186 | WDFY3   | WD repeat and FYVE domain containing 3                                 |
| 1,044635763 | 0,83473 | 0,872967591 | 0,01782 | WDHD1   | WD repeat and HMG-box DNA binding protein 1                            |
| 0,993781093 | 0,96575 | 0,844400887 | 0,00373 | WDHD1   | WD repeat and HMG-box DNA binding protein 1                            |
| 0,749499801 | 0,25607 | 0,812815602 | 0,01627 | WDR11   | WD repeat domain 11                                                    |
| 1,056285625 | 0,87134 | 0,780786493 | 0,01906 | WDR11   | WD repeat domain 11                                                    |
| 0,848507902 | 0,28058 | 0,910669834 | 0,04703 | WDR12   | WD repeat domain 12                                                    |
| 1,035982764 | 0,86154 | 0,832198735 | 0,02736 | WDR20   | WD repeat domain 20                                                    |
| 0,855595026 | 0,28454 | 0,748461493 | 0,0029  | WDR20   | WD repeat domain 20                                                    |
| 0,695923196 | 0,10724 | 0,77271055  | 0,00076 | WDR20   | WD repeat domain 20                                                    |
| 1,067325338 | 0,52968 | 1,124278924 | 0,01719 | WDR25   | WD repeat domain 25                                                    |
| 0,729004689 | 0,11224 | 0,79940583  | 0,02892 | WDR26   | WD repeat domain 26                                                    |
| 1,255271991 | 0,07203 | 1,151887642 | 0,00722 | WDR27   | WD repeat domain 27                                                    |
| 1,209940089 | 0,11899 | 1,139973273 | 0,02016 | WDR27   | WD repeat domain 27                                                    |
| 1,009751298 | 0,90464 | 1,181811547 | 0,00984 | WDR27   | WD repeat domain 27                                                    |
| 0,782954296 | 0,2273  | 0,767905135 | 0,00001 | WDR3    | WD repeat domain 3                                                     |
| 0,748980467 | 0,27828 | 0,767905135 | 0,01343 | WDR33   | WD repeat domain 33                                                    |
| 0,883315051 | 0,27432 | 0,838568184 | 0,00514 | WDR35   | WD repeat domain 35                                                    |
| 0,802181166 | 0,2175  | 0,758909626 | 0,00491 | WDR36   | WD repeat domain 36                                                    |
| 0,862143545 | 0,25716 | 0,829894586 | 0,00051 | WDR37   | WD repeat domain 37                                                    |
| 1,036701101 | 0,86624 | 0,824162085 | 0,00631 | WDR4    | WD repeat domain 4                                                     |
| 0,713507253 | 0,18713 | 0,749499801 | 0,00012 | WDR43   | WD repeat domain 43                                                    |
| 0,852044095 | 0,51373 | 0,744838732 | 0,00331 | WDR44   | WD repeat domain 44                                                    |
| 1,200803427 | 0,12641 | 1,171210181 | 0,0065  | WDR45   | WD repeat domain 45                                                    |
| 1,090507733 | 0,64399 | 1,209155676 | 0,00169 | WDR45   | WD repeat domain 45                                                    |
| 0,565657231 | 0,06859 | 0,602068691 | 0,00073 | WDR47   | WD repeat domain 47                                                    |
| 1,180174343 | 0,13332 | 1,162314108 | 0,01432 | WDR54   | WD repeat domain 54                                                    |
| 1,064370182 | 0,46857 | 1,136816973 | 0,02744 | WDR55   | WD repeat domain 55                                                    |
| 0,805524291 | 0,09251 | 0,899378312 | 0,01426 | WDR59   | WD repeat domain 59                                                    |
| 0,698339266 | 0,06092 | 0,790041312 | 0,03735 | WDR59   | WD repeat domain 59                                                    |
| 1,122721422 | 0,38033 | 1,185914499 | 0,02213 | WDR58   | WD repeat domain 58                                                    |
| 1,097331938 | 0,65245 | 1,237132479 | 0,02931 | WDR6    | WD repeat domain 6                                                     |
| 0,987600861 | 0,90732 | 0,888842681 | 0,04829 | WDR60   | WD repeat domain 60                                                    |
| 0,865136691 | 0,4132  | 0,820741609 | 0,00087 | WDR60   | WD repeat domain 60                                                    |
| 0,84323111  | 0,17395 | 0,841479482 | 0,0022  | WDR61   | WD repeat domain 61                                                    |
| 0,703684188 | 0,06312 | 0,654742712 | 0,00004 | WDR61   | WD repeat domain 61                                                    |
| 1,071773463 | 0,31486 | 1,111879158 | 0,03923 | WDR66   | WD repeat domain 66                                                    |
| 0,76630998  | 0,16598 | 0,617709319 | 0,00174 | WDR66   | WD repeat domain 66                                                    |
| 1,039579435 | 0,55549 | 1,105730653 | 0,03896 | WDR7    | WD repeat domain 7                                                     |
| 0,796088099 | 0,09087 | 0,860949188 | 0,01962 | WDR70   | WD repeat domain 70                                                    |
| 1,100378609 | 0,41203 | 1,119612889 | 0,02318 | WDR72   | WD repeat domain 72                                                    |
| 0,815072332 | 0,07459 | 0,894404902 | 0,02268 | WDR73   | WD repeat domain 73                                                    |
| 1,230291345 | 0,07862 | 1,231144413 | 0,00317 | WDR85   | WD repeat domain 85                                                    |
| 0,939522749 | 0,5838  | 0,831045862 | 0,01621 | WDR89   | WD repeat domain 89                                                    |

|             |         |             |         |          |                                                                                             |
|-------------|---------|-------------|---------|----------|---------------------------------------------------------------------------------------------|
| 1,056285625 | 0,4489  | 1,212512819 | 0,01712 | WDR89    | WD repeat domain 89                                                                         |
| 0,800514811 | 0,29306 | 0,742261785 | 0,00068 | WDSUB1   | WD repeat, sterile alpha motif and U-box domain containing 1                                |
| 1,00695555  | 0,93247 | 0,898132373 | 0,01405 | WDYHV1   | WDYHV motif containing 1                                                                    |
| 0,679243142 | 0,14179 | 0,598739352 | 0,00111 | WEE1     | WEE1 homolog (S. pombe)                                                                     |
| 1,301341855 | 0,12991 | 1,723092319 | 0,00005 | WFDC1    | WAP four-disulfide core domain 1                                                            |
| 1,106497353 | 0,48911 | 1,180174343 | 0,0043  | WFDC10B  | WAP four-disulfide core domain 10B                                                          |
| 1,168777249 | 0,13255 | 1,186736798 | 0,00104 | WFDC2    | WAP four-disulfide core domain 2                                                            |
| 0,995159722 | 0,93853 | 1,119612889 | 0,03947 | WFDC8    | WAP four-disulfide core domain 8                                                            |
| 0,995849753 | 0,96805 | 1,156688184 | 0,00337 | WFIKKN1  | WAP, follistatin/kazal, immunoglobulin, kunitz and netrin domain containing 1               |
| 0,873572896 | 0,07291 | 1,109569472 | 0,01997 | WFIKKN2  | WAP, follistatin/kazal, immunoglobulin, kunitz and netrin domain containing 2               |
| 0,791685866 | 0,17533 | 0,876605721 | 0,00348 | WHAMM    | WAS protein homolog associated with actin, golgi membranes and microtubules                 |
| 1,242288282 | 0,12548 | 1,235418637 | 0,00326 | WHAMMP2  | WAS protein homolog associated with actin, golgi membranes and microtubules pseudogene 2    |
| 0,862143545 | 0,69523 | 0,834509281 | 0,03269 | WHSC1L1  | Wolf-Hirschhorn syndrome candidate 1-like 1                                                 |
| 0,96996191  | 0,70908 | 1,109569472 | 0,04871 | WHSC1L1  | Wolf-Hirschhorn syndrome candidate 1-like 1                                                 |
| 0,915733686 | 0,28382 | 0,799960128 | 0,00094 | WHSC2    | Wolf-Hirschhorn syndrome candidate 2                                                        |
| 0,868742185 | 0,29171 | 0,791137301 | 0,00185 | WIBG     | within bgcn homolog (Drosophila)                                                            |
| 0,787307977 | 0,17199 | 0,868742185 | 0,03471 | WIPF2    | WAS/WASL interacting protein family, member 2                                               |
| 1,018891197 | 0,80651 | 1,188383105 | 0,00519 | WIPF3    | WAS/WASL interacting protein family, member 3                                               |
| 0,823020345 | 0,11709 | 0,855002178 | 0,00325 | WIPI2    | WD repeat domain, phosphoinositide interacting 2                                            |
| 1,278985581 | 0,05601 | 1,268391399 | 0,02521 | WISP1    | WNT1 inducible signaling pathway protein 1                                                  |
| 1,098092814 | 0,37471 | 1,187559666 | 0,03318 | WISP1    | WNT1 inducible signaling pathway protein 1                                                  |
| 1,062895674 | 0,52035 | 1,167158102 | 0,0054  | WNK2     | WNK lysine deficient protein kinase 2                                                       |
| 1,093535457 | 0,3756  | 1,278985581 | 0,00123 | WNK2     | WNK lysine deficient protein kinase 2                                                       |
| 1,106497353 | 0,47966 | 1,266634254 | 0,00044 | WNK2     | WNK lysine deficient protein kinase 2                                                       |
| 1,033114388 | 0,73826 | 1,105730653 | 0,04291 | WNK3     | WNK lysine deficient protein kinase 3                                                       |
| 1,136816973 | 0,36199 | 1,230291345 | 0,00689 | WNK3     | WNK lysine deficient protein kinase 3                                                       |
| 1,080725402 | 0,45926 | 1,308578071 | 0,00176 | WNT10B   | wingless-type MMTV integration site family, member 10B                                      |
| 0,78132788  | 0,17921 | 0,823591017 | 0,04315 | WNT2B    | wingless-type MMTV integration site family, member 2B                                       |
| 0,79608099  | 0,18729 | 0,808069374 | 0,04848 | WNT5A    | wingless-type MMTV integration site family, member 5A                                       |
| 0,757333158 | 0,07299 | 0,719466679 | 0,02271 | WNT5A    | wingless-type MMTV integration site family, member 5A                                       |
| 1,416175438 | 0,08053 | 1,435944511 | 0,0001  | WNT5B    | wingless-type MMTV integration site family, member 5B                                       |
| 1,167158102 | 0,33035 | 1,190856849 | 0,00473 | WNT6     | wingless-type MMTV integration site family, member 6                                        |
| 0,898132373 | 0,25972 | 0,732550437 | 0,00006 | WNT7B    | wingless-type MMTV integration site family, member 7B                                       |
| 1,136816973 | 0,31691 | 0,823020345 | 0,03256 | WNT9A    | wingless-type MMTV integration site family, member 9A                                       |
| 1,110338834 | 0,6411  | 1,125058485 | 0,03006 | WRAP73   | WD repeat containing, antisense to TP73                                                     |
| 1,043188594 | 0,66985 | 1,126619228 | 0,03906 | WRAP73   | WD repeat containing, antisense to TP73                                                     |
| 0,842062954 | 0,37044 | 0,821310701 | 0,00425 | WRN      | Werner syndrome, RecQ helicase-like                                                         |
| 0,85086373  | 0,2084  | 0,821310701 | 0,00349 | WRNIP1   | Werner helicase interacting protein 1                                                       |
| 0,863339559 | 0,62977 | 0,822450069 | 0,01849 | WSB1     | WD repeat and SOCS box containing 1                                                         |
| 0,793883931 | 0,08673 | 0,748461493 | 0,00002 | WSB2     | WD repeat and SOCS box containing 2                                                         |
| 1,151089491 | 0,21337 | 1,139973273 | 0,03711 | WSCD1    | WSC domain containing 1                                                                     |
| 0,915733686 | 0,43047 | 0,846158597 | 0,02088 | WTAP     | Wilms tumor 1 associated protein                                                            |
| 0,89075733  | 0,55035 | 0,787307977 | 0,0054  | WTAP     | Wilms tumor 1 associated protein                                                            |
| 0,911301281 | 0,52445 | 0,842062954 | 0,01459 | WWC2     | WW and C2 domain containing 2                                                               |
| 1,022428531 | 0,87597 | 1,199139914 | 0,00823 | WWOX     | WW domain containing oxidoreductase                                                         |
| 0,793333843 | 0,38998 | 0,677832163 | 0,00145 | WWP1     | WW domain containing E3 ubiquitin protein ligase 1                                          |
| 0,785672517 | 0,1952  | 0,812252396 | 0,00023 | WWP1     | WW domain containing E3 ubiquitin protein ligase 1                                          |
| 1,042465761 | 0,73654 | 1,139183377 | 0,03122 | WWP2     | WW domain containing E3 ubiquitin protein ligase 2                                          |
| 0,843815796 | 0,13924 | 0,801625329 | 0,0101  | WWP2     | WW domain containing E3 ubiquitin protein ligase 2                                          |
| 0,719965659 | 0,12367 | 0,717972255 | 0,00001 | WWTR1    | WW domain containing transcription regulator 1                                              |
| 0,649319301 | 0,07106 | 0,722465199 | 0,01053 | XAF1     | XIAP associated factor 1                                                                    |
| 1,261377409 | 0,24334 | 1,5888688   | 0,00036 | XDH      | xanthine dehydrogenase                                                                      |
| 1,101141598 | 0,60945 | 0,840313752 | 0,0147  | XIAP     | X-linked inhibitor of apoptosis                                                             |
| 1,054822317 | 0,75619 | 0,847332435 | 0,04513 | XIAP     | X-linked inhibitor of apoptosis                                                             |
| 1,127400412 | 0,15606 | 1,159899655 | 0,01672 | XIRP1    | xin actin-binding repeat containing 1                                                       |
| 1,009051634 | 0,94407 | 1,227735684 | 0,00458 | XIST     | X (inactive)-specific transcript (non-protein coding)                                       |
| 0,659753955 | 0,17376 | 0,552865327 | 0,00002 | XK       | X-linked Kx blood group (McLeod syndrome)                                                   |
| 1,086065408 | 0,49584 | 1,192508872 | 0,00507 | XKR8     | XK, Kell blood group complex subunit-related family, member 8                               |
| 1,099616149 | 0,2592  | 1,17609125  | 0,02537 | XPNPEP2  | X-prolyl aminopeptidase (aminopeptidase P) 2, membrane-bound                                |
| 0,880869374 | 0,5746  | 0,792784137 | 0,00247 | XPNPEP3  | X-prolyl aminopeptidase (aminopeptidase P) 3, putative                                      |
| 0,90062598  | 0,27647 | 0,868140228 | 0,02608 | XPNPEP3  | X-prolyl aminopeptidase (aminopeptidase P) 3, putative                                      |
| 0,882702996 | 0,52913 | 0,871154192 | 0,02368 | XPO1     | exportin 1 (CRM1 homolog, yeast)                                                            |
| 0,673616788 | 0,05826 | 0,677362489 | 0,00014 | XPO7     | exportin 7                                                                                  |
| 1,270150983 | 0,15792 | 1,247465572 | 0,00926 | XPR1     | xenotropic and polytropic retrovirus receptor 1                                             |
| 0,510860041 | 0,09412 | 0,827596816 | 0,00123 | XRCC6    | X-ray repair complementing defective repair in Chinese hamster cells 6                      |
| 0,866937564 | 0,25529 | 0,728499557 | 0,00079 | XRCC6BP1 | XRCC6 binding protein 1                                                                     |
| 1,054822317 | 0,53136 | 1,121943481 | 0,02579 | XRRA1    | X-ray radiation resistance associated 1                                                     |
| 1,163120042 | 0,12486 | 1,118837101 | 0,00821 | XRRA1    | X-ray radiation resistance associated 1                                                     |
| 0,993092495 | 0,92206 | 0,906890329 | 0,0209  | XYLB     | xylokinase homolog (H. influenzae)                                                          |
| 0,801069878 | 0,35012 | 0,825305409 | 0,02649 | XYLT1    | xylosyltransferase 1                                                                        |
| 1,121943481 | 0,43679 | 0,884540435 | 0,01006 | YAF2     | YY1 associated factor 2                                                                     |
| 0,763129604 | 0,23171 | 0,774319028 | 0,00798 | YAP1     | Yes-associated protein 1                                                                    |
| 0,879649076 | 0,24937 | 0,835666959 | 0,00182 | YARS2    | tyrosyl-tRNA synthetase 2, mitochondrial                                                    |
| 0,87175824  | 0,42548 | 0,851453708 | 0,03435 | YBEY     | ybeY metalloproteinase (putative)                                                           |
| 1,244874235 | 0,06261 | 1,182631    | 0,0071  | YBX2     | Y box binding protein 2                                                                     |
| 0,806082831 | 0,09646 | 0,744322628 | 0,00031 | YEATS4   | YEATS domain containing 4                                                                   |
| 0,697371833 | 0,1275  | 0,737134609 | 0       | YES1     | v-yes-1 Yamaguchi sarcoma viral oncogene homolog 1                                          |
| 1,025267238 | 0,92782 | 1,332374825 | 0,00316 | YIF1B    | Yip1 interacting factor homolog B (S. cerevisiae)                                           |
| 1,111108729 | 0,37405 | 1,230291345 | 0,02502 | YIF1B    | Yip1 interacting factor homolog B (S. cerevisiae)                                           |
| 1,214194884 | 0,05966 | 1,119612889 | 0,02292 | YIPF1    | Yip1 domain family, member 1                                                                |
| 1,065108203 | 0,51686 | 1,152686347 | 0,02903 | YIPF2    | Yip1 domain family, member 2                                                                |
| 1,133669413 | 0,28    | 1,236275261 | 0,00019 | YIPF2    | Yip1 domain family, member 2                                                                |
| 0,90062598  | 0,29447 | 0,877821798 | 0,03071 | YIPF5    | Yip1 domain family, member 5                                                                |
| 0,872967591 | 0,40714 | 0,833931044 | 0,03326 | YLPM1    | YLP motif containing 1                                                                      |
| 1,107264584 | 0,37227 | 1,145517898 | 0,04602 | YLPM1    | YLP motif containing 1                                                                      |
| 0,750539549 | 0,06825 | 0,840313752 | 0,00408 | YME1L1   | YME1-like 1 (S. cerevisiae)                                                                 |
| 1,237132479 | 0,46841 | 0,61985385  | 0,00032 | YME1L1   | YME1-like 1 (S. cerevisiae)                                                                 |
| 0,575544746 | 0,09389 | 0,538493188 | 0,01974 | YOD1     | YOD1 OTU deubiquitinating enzyme 1 homolog (S. cerevisiae)                                  |
| 0,933679945 | 0,4122  | 0,806082831 | 0,00288 | YRDC     | yrnC domain containing (E. coli)                                                            |
| 1,112650121 | 0,30895 | 1,157490217 | 0,0355  | YSK4     | YSK4 Sps1/Ste20-related kinase homolog (S. cerevisiae)                                      |
| 0,920825697 | 0,6339  | 0,796088099 | 0,012   | YTHDC1   | YTH domain containing 1                                                                     |
| 0,715984371 | 0,26432 | 0,729510172 | 0,00702 | YTHDC2   | YTH domain containing 2                                                                     |
| 0,767905135 | 0,14371 | 0,903752727 | 0,03557 | YTHDF1   | YTH domain family, member 1                                                                 |
| 0,858565436 | 0,27735 | 0,844986384 | 0,00028 | YTHDF2   | YTH domain family, member 2                                                                 |
| 0,836826243 | 0,43011 | 0,886381699 | 0,01711 | YTHDF2   | YTH domain family, member 2                                                                 |
| 0,560194607 | 0,05026 | 0,847919965 | 0,02611 | YWHAH    | tyrosine 3-monooxygenase/tryptophan 5-monooxygenase activation protein, beta polypeptide    |
| 0,782954296 | 0,32371 | 0,845572287 | 0,04235 | YWHAH    | tyrosine 3-monooxygenase/tryptophan 5-monooxygenase activation protein, beta polypeptide    |
| 0,571173123 | 0,27243 | 0,726986259 | 0,00576 | YWHAH    | tyrosine 3-monooxygenase/tryptophan 5-monooxygenase activation protein, epsilon polypeptide |
| 0,898755127 | 0,46959 | 0,888226796 | 0,00531 | YWHAH    | tyrosine 3-monooxygenase/tryptophan 5-monooxygenase activation protein, gamma polypeptide   |
| 0,910669834 | 0,41052 | 0,86934456  | 0,04844 | YWHAH    | tyrosine 3-monooxygenase/tryptophan 5-monooxygenase activation protein, eta polypeptide     |
| 0,932386486 | 0,78756 | 0,852044095 | 0,02325 | YY1      | YY1 transcription factor                                                                    |
| 1,012554807 | 0,86351 | 1,216722359 | 0,00001 | YY2      | YY2 transcription factor                                                                    |
| 0,790589117 | 0,0591  | 0,780786493 | 0,00122 | ZADH2    | zinc binding alcohol dehydrogenase domain containing 2                                      |
| 0,90312651  | 0,49384 | 0,806082831 | 0,00055 | ZAK      | sterile alpha motif and leucine zipper containing kinase AZK                                |

|             |         |             |         |          |                                                                  |
|-------------|---------|-------------|---------|----------|------------------------------------------------------------------|
| 1,055553718 | 0,59691 | 1,227735684 | 0,00035 | ZAN      | zonadhesin                                                       |
| 0,936921447 | 0,47474 | 1,104198847 | 0,04733 | ZAR1     | zygote arrest 1                                                  |
| 0,69640574  | 0,10903 | 0,759435845 | 0,00131 | ZBED1    | zinc finger, BED-type containing 1                               |
| 0,825877665 | 0,29655 | 0,819604608 | 0,00871 | ZBED2    | zinc finger, BED-type containing 2                               |
| 0,890692901 | 0,26847 | 0,813943185 | 0,00481 | ZBED4    | zinc finger, BED-type containing 4                               |
| 0,704172113 | 0,10595 | 0,645281245 | 0,00045 | ZBED6    | zinc finger, BED-type containing 6                               |
| 0,928516852 | 0,75554 | 0,777546036 | 0,0301  | ZBTB1    | zinc finger and BTB domain containing 1                          |
| 1,440929749 | 0,1097  | 1,157490217 | 0,02759 | ZBTB10   | zinc finger and BTB domain containing 10                         |
| 0,770037174 | 0,22756 | 0,782954296 | 0,00263 | ZBTB11   | zinc finger and BTB domain containing 11                         |
| 1,758383773 | 0,10418 | 0,696888619 | 0,002   | ZBTB11   | zinc finger and BTB domain containing 11                         |
| 0,100378609 | 0,25189 | 1,138394029 | 0,04363 | ZBTB12   | zinc finger and BTB domain containing 12                         |
| 1,04608494  | 0,78958 | 0,886996305 | 0,02016 | ZBTB2    | zinc finger and BTB domain containing 2                          |
| 1,810012926 | 0,06364 | 1,223488041 | 0,04374 | ZBTB20   | zinc finger and BTB domain containing 20                         |
| 1,453972517 | 0,10601 | 1,22858698  | 0,04456 | ZBTB20   | zinc finger and BTB domain containing 20                         |
| 1,065108203 | 0,6455  | 0,86154616  | 0,03172 | ZBTB24   | zinc finger and BTB domain containing 24                         |
| 1,236275261 | 0,07892 | 1,145517898 | 0,0219  | ZBTB25   | zinc finger and BTB domain containing 25                         |
| 1,115739322 | 0,34411 | 1,122721422 | 0,027   | ZBTB32   | zinc finger and BTB domain containing 32                         |
| 0,69640574  | 0,13307 | 0,770037174 | 0,00003 | ZBTB33   | zinc finger and BTB domain containing 33                         |
| 0,968618189 | 0,88909 | 0,819036698 | 0,02805 | ZBTB34   | zinc finger and BTB domain containing 34                         |
| 1,425037614 | 0,07082 | 1,413233644 | 0,00282 | ZBTB38   | zinc finger and BTB domain containing 38                         |
| 1,0238469   | 0,92378 | 0,806641759 | 0,03226 | ZBTB41   | zinc finger and BTB domain containing 41                         |
| 0,689202576 | 0,1962  | 0,691116103 | 0,00007 | ZBTB43   | zinc finger and BTB domain containing 43                         |
| 0,811127156 | 0,1692  | 0,798298386 | 0,00635 | ZBTB43   | zinc finger and BTB domain containing 43                         |
| 0,751580739 | 0,07676 | 0,650670928 | 0       | ZBTB43   | zinc finger and BTB domain containing 43                         |
| 0,835087919 | 0,35419 | 0,876605721 | 0,01536 | ZBTB44   | zinc finger and BTB domain containing 44                         |
| 0,719965659 | 0,10457 | 0,846158597 | 0,0425  | ZBTB44   | zinc finger and BTB domain containing 44                         |
| 1,298638603 | 0,08923 | 1,227735684 | 0,00664 | ZBTB46   | zinc finger and BTB domain containing 46                         |
| 0,856188285 | 0,18648 | 0,773246337 | 0,02133 | ZBTB7A   | zinc finger and BTB domain containing 7A                         |
| 1,188383105 | 0,34818 | 1,407368375 | 0,00523 | ZC3H12A  | zinc finger CCCH-type containing 12A                             |
| 0,832198735 | 0,53444 | 0,79940583  | 0,03665 | ZC3H12C  | zinc finger CCCH-type containing 12C                             |
| 1,050444544 | 0,57276 | 1,183451022 | 0,00222 | ZC3H13   | zinc finger CCCH-type containing 13                              |
| 0,793333843 | 0,20015 | 0,76950361  | 0,00605 | ZC3H13   | zinc finger CCCH-type containing 13                              |
| 0,954621014 | 0,78226 | 0,838568184 | 0,00979 | ZC3H13   | zinc finger CCCH-type containing 13                              |
| 0,717474767 | 0,07981 | 0,765778999 | 0,00041 | ZC3H14   | zinc finger CCCH-type containing 14                              |
| 0,678302164 | 0,3735  | 0,76418826  | 0,00053 | ZC3H15   | zinc finger CCCH-type containing 15                              |
| 0,803293997 | 0,25204 | 0,722465199 | 0,00013 | ZC3H15   | zinc finger CCCH-type containing 15                              |
| 1,098092814 | 0,42564 | 1,125838586 | 0,02466 | ZC3H7B   | zinc finger CCCH-type containing 7B                              |
| 0,790041312 | 0,13361 | 0,840313752 | 0,02861 | ZC3H7B   | zinc finger CCCH-type containing 7B                              |
| 0,879649076 | 0,56625 | 0,763129604 | 0,00685 | ZC3HAV1L | zinc finger CCCH-type, antiviral 1-like                          |
| 0,962594443 | 0,70821 | 1,127400412 | 0,01026 | ZC4H2    | zinc finger, C4H2 domain containing                              |
| 0,852634892 | 0,53134 | 0,72597914  | 0,00412 | ZCCHC10  | zinc finger, CCHC domain containing 10                           |
| 0,883927531 | 0,55875 | 0,718470088 | 0,00449 | ZCCHC10  | zinc finger, CCHC domain containing 10                           |
| 1,111879158 | 0,22652 | 1,244011653 | 0,00044 | ZCCHC12  | zinc finger, CCHC domain containing 12                           |
| 0,730522189 | 0,11852 | 0,779704843 | 0,00633 | ZCCHC14  | zinc finger, CCHC domain containing 14                           |
| 0,777007269 | 0,31924 | 0,772175133 | 0,00038 | ZCCHC2   | zinc finger, CCHC domain containing 2                            |
| 0,924022572 | 0,80287 | 0,73153561  | 0,00184 | ZCCHC2   | zinc finger, CCHC domain containing 2                            |
| 1,42899414  | 0,12477 | 1,22603486  | 0,02922 | ZCCHC24  | zinc finger, CCHC domain containing 24                           |
| 0,753667455 | 0,14108 | 0,750019495 | 0,00018 | ZCCHC6   | zinc finger, CCHC domain containing 6                            |
| 0,911933166 | 0,70499 | 0,813943185 | 0,00593 | ZCCHC7   | zinc finger, CCHC domain containing 7                            |
| 0,884504035 | 0,60966 | 0,815072332 | 0,04181 | ZCCHC8   | zinc finger, CCHC domain containing 8                            |
| 0,827596816 | 0,17879 | 0,886996305 | 0,03159 | ZCRB1    | zinc finger CCHC-type and RNA binding motif 1                    |
| 0,720964436 | 0,09078 | 0,598739352 | 0,00012 | ZDHHC11  | zinc finger, DHHC-type containing 11                             |
| 0,910669834 | 0,46194 | 0,831045862 | 0,00652 | ZDHHC11  | zinc finger, DHHC-type containing 11                             |
| 1,152686347 | 0,16636 | 1,159095952 | 0,04665 | ZDHHC14  | zinc finger, DHHC-type containing 14                             |
| 1,073260286 | 0,5454  | 1,121943481 | 0,03301 | ZDHHC14  | zinc finger, DHHC-type containing 14                             |
| 1,028113827 | 0,75551 | 0,898132373 | 0,03145 | ZDHHC19  | zinc finger, DHHC-type containing 19                             |
| 0,865136691 | 0,58546 | 0,717972255 | 0,005   | ZDHHC21  | zinc finger, DHHC-type containing 21                             |
| 1,082224645 | 0,45676 | 1,117287138 | 0,04544 | ZDHHC21  | zinc finger, DHHC-type containing 21                             |
| 0,672683604 | 0,16914 | 0,7031966   | 0,00164 | ZDHHC21  | zinc finger, DHHC-type containing 21                             |
| 0,722465199 | 0,062   | 0,71400199  | 0,02131 | ZDHHC21  | zinc finger, DHHC-type containing 21                             |
| 0,771105413 | 0,28678 | 0,648869383 | 0,01138 | ZDHHC21  | zinc finger, DHHC-type containing 21                             |
| 1,10343374  | 0,26616 | 1,161508732 | 0,00452 | ZDHHC22  | zinc finger, DHHC-type containing 22                             |
| 1,077733145 | 0,70672 | 1,144724161 | 0,0329  | ZDHHC4   | zinc finger, DHHC-type containing 4                              |
| 0,791137301 | 0,32344 | 0,828170661 | 0,00337 | ZDHHC9   | zinc finger, DHHC-type containing 9                              |
| 1,028113827 | 0,81874 | 0,87539133  | 0,02287 | ZDHHC9   | zinc finger, DHHC-type containing 9                              |
| 1,041021598 | 0,76091 | 1,186736798 | 0,01766 | ZER1     | zer-1 homolog (C. elegans)                                       |
| 0,759962428 | 0,12292 | 0,825305409 | 0,03586 | ZFAND1   | zinc finger, AN1-type domain 1                                   |
| 0,833353207 | 0,0728  | 0,898132373 | 0,04936 | ZFAND2A  | zinc finger, AN1-type domain 2A                                  |
| 1,054091423 | 0,67349 | 1,10343374  | 0,03269 | ZFAND3   | zinc finger, AN1-type domain 3                                   |
| 1,110338834 | 0,73685 | 0,683493726 | 0,00054 | ZFAND6   | zinc finger, AN1-type domain 6                                   |
| 1,035264924 | 0,66925 | 0,909408252 | 0,04688 | ZFHX3    | zinc finger homeobox 3                                           |
| 0,888842681 | 0,56913 | 0,787307977 | 0,00464 | ZFP1     | zinc finger protein 1 homolog (mouse)                            |
| 0,828170661 | 0,38099 | 0,735603373 | 0,00575 | ZFP112   | zinc finger protein 112 homolog (mouse)                          |
| 0,963261894 | 0,66523 | 0,833353207 | 0,02758 | ZFP161   | zinc finger protein 161 homolog (mouse)                          |
| 0,882702996 | 0,18123 | 0,875998315 | 0,03386 | ZFP161   | zinc finger protein 161 homolog (mouse)                          |
| 1,167967395 | 0,20909 | 0,852634892 | 0,01116 | ZFP28    | zinc finger protein 28 homolog (mouse)                           |
| 0,966606097 | 0,65711 | 1,092020546 | 0,02685 | ZFP36L1  | zinc finger protein 36, C3H type-like 1                          |
| 1,127400412 | 1,4024  | 1,235418637 | 0,00147 | ZFP57    | zinc finger protein 57 homolog (mouse)                           |
| 0,864537231 | 0,34713 | 1,883315051 | 0,03521 | ZFP62    | zinc finger protein 62 homolog (mouse)                           |
| 1,0132569   | 0,92929 | 0,845572287 | 0,01277 | ZFP64    | zinc finger protein 64 homolog (mouse)                           |
| 0,96996191  | 0,77659 | 1,16634937  | 0,00508 | ZFP64    | zinc finger protein 64 homolog (mouse)                           |
| 1,083725967 | 0,35245 | 1,155085785 | 0,04881 | ZFP82    | zinc finger protein 82 homolog (mouse)                           |
| 0,564482202 | 0,09978 | 0,811127156 | 0,02013 | ZFP90    | zinc finger protein 90 homolog (mouse)                           |
| 1           | 0,9999  | 1,160703914 | 0,01037 | ZFPL1    | zinc finger protein-like 1                                       |
| 0,817335328 | 0,15922 | 0,820741609 | 0,01678 | ZFR      | zinc finger RNA binding protein                                  |
| 0,774319028 | 0,1125  | 0,889458994 | 0,01028 | ZFX      | zinc finger protein, X-linked                                    |
| 1,021012126 | 0,89669 | 0,821310701 | 0,04898 | ZFY      | zinc finger protein, Y-linked                                    |
| 0,941478465 | 0,69259 | 0,746389192 | 0,00467 | ZFY      | zinc finger protein, Y-linked                                    |
| 0,965936329 | 0,85959 | 0,857376037 | 0,0401  | ZFYVE16  | zinc finger, FYVE domain containing 16                           |
| 0,815637493 | 0,14075 | 0,832198735 | 0,00008 | ZFYVE20  | zinc finger, FYVE domain containing 20                           |
| 0,579146403 | 0,06848 | 0,69640574  | 0,02436 | ZFYVE21  | zinc finger, FYVE domain containing 21                           |
| 0,819604608 | 0,11058 | 0,808320869 | 0,00205 | ZFYVE26  | zinc finger, FYVE domain containing 26                           |
| 0,841479482 | 0,08207 | 0,883927531 | 0,01938 | ZFYVE26  | zinc finger, FYVE domain containing 26                           |
| 1,015366101 | 0,89127 | 0,832198735 | 0,02886 | ZFYVE28  | zinc finger, FYVE domain containing 28                           |
| 1,065846736 | 0,62841 | 1,204137381 | 0,01202 | ZGLP1    | zinc finger, GATA-like protein 1                                 |
| 0,632439771 | 0,08206 | 0,618995145 | 0,00005 | ZHX1     | zinc fingers and homeoboxes 1                                    |
| 1,04608494  | 0,52404 | 0,915099168 | 0,04302 | ZIC2     | Zic family member 2                                              |
| 1,128182137 | 0,16771 | 1,136029265 | 0,00938 | ZIC3     | Zic family member 3                                              |
| 1,221793102 | 0,1314  | 1,128964405 | 0,01655 | ZIK1     | zinc finger protein interacting with K protein 1 homolog (mouse) |
| 1,183451022 | 0,10388 | 1,150291893 | 0,00548 | ZIM2     | zinc finger, imprinted 2                                         |
| 0,530711604 | 0,07404 | 0,718968266 | 0,00009 | ZKSCAN1  | zinc finger with KRAB and SCAN domains 1                         |
| 0,461051559 | 0,09606 | 0,795536484 | 0,023   | ZKSCAN1  | zinc finger with KRAB and SCAN domains 1                         |
| 1,182631    | 0,05281 | 1,21167266  | 0,0007  | ZKSCAN3  | zinc finger with KRAB and SCAN domains 3                         |
| 0,839149637 | 0,17142 | 0,816203046 | 0,00141 | ZMI21    | zinc finger, MIZ-type containing 1                               |

|             |         |             |         |          |                                                               |
|-------------|---------|-------------|---------|----------|---------------------------------------------------------------|
| 1,051901779 | 0,65911 | 1,142346247 | 0,01934 | ZMIZ2    | zinc finger, MIZ-type containing 2                            |
| 0,878430468 | 0,43236 | 0,84264683  | 0,00039 | ZMPSTE24 | zinc metalloproteinase (STE24 homolog, <i>S. cerevisiae</i> ) |
| 0,802181166 | 0,28931 | 0,639049682 | 0,00177 | ZMYM2    | zinc finger, MYM-type 2                                       |
| 0,902500727 | 0,75283 | 0,632001549 | 0,00493 | ZMYM2    | zinc finger, MYM-type 2                                       |
| 0,915099168 | 0,68784 | 0,825877665 | 0,02075 | ZMYM4    | zinc finger, MYM-type 4                                       |
| 0,784040454 | 0,06404 | 0,738669032 | 0,00941 | ZMYM6    | zinc finger, MYM-type 6                                       |
| 0,879649076 | 0,52994 | 0,732550437 | 0,00869 | ZMYM6    | zinc finger, MYM-type 6                                       |
| 0,833353207 | 0,27995 | 0,768437591 | 0,01063 | ZMYM6    | zinc finger, MYM-type 6                                       |
| 0,966606097 | 0,69011 | 0,90062598  | 0,01664 | ZMYND11  | zinc finger, MYND-type containing 11                          |
| 1,050444544 | 0,57603 | 1,187559666 | 0,00528 | ZMYND12  | zinc finger, MYND-type containing 12                          |
| 1,109569472 | 0,5482  | 1,261377409 | 0,0075  | ZMYND8   | zinc finger, MYND-type containing 8                           |
| 1,136816973 | 0,31484 | 1,276328769 | 0,00083 | ZMYND8   | zinc finger, MYND-type containing 8                           |
| 1,169587664 | 0,05408 | 1,150291893 | 0,00348 | ZMYND8   | zinc finger, MYND-type containing 8                           |
| 0,728499557 | 0,2997  | 0,660211421 | 0,00442 | ZNF107   | zinc finger protein 107                                       |
| 0,963929808 | 0,73183 | 1,225185332 | 0,00344 | ZNF107   | zinc finger protein 107                                       |
| 1,180992661 | 0,12923 | 1,096571589 | 0,0475  | ZNF114   | zinc finger protein 114                                       |
| 1,176906737 | 0,56802 | 0,823591017 | 0,00091 | ZNF12    | zinc finger protein 12                                        |
| 1,030968319 | 0,91863 | 0,856781955 | 0,00202 | ZNF12    | zinc finger protein 12                                        |
| 0,882702996 | 0,59008 | 0,636838738 | 0,00031 | ZNF124   | zinc finger protein 124                                       |
| 0,76684133  | 0,07713 | 0,71946679  | 0,00003 | ZNF131   | zinc finger protein 131                                       |
| 0,757333158 | 0,19172 | 0,699792933 | 0,00073 | ZNF131   | zinc finger protein 131                                       |
| 0,917639882 | 0,72301 | 0,751580739 | 0,00014 | ZNF131   | zinc finger protein 131                                       |
| 0,791685866 | 0,38302 | 0,715984371 | 0,00046 | ZNF131   | zinc finger protein 131                                       |
| 1,094293701 | 0,27907 | 1,109569472 | 0,02857 | ZNF131   | zinc finger protein 131                                       |
| 1,051172909 | 0,68361 | 1,104964485 | 0,01495 | ZNF135   | zinc finger protein 135                                       |
| 0,723969086 | 0,12215 | 0,771105413 | 0,00752 | ZNF138   | zinc finger protein 138                                       |
| 0,790589117 | 0,07139 | 0,814507563 | 0,00442 | ZNF140   | zinc finger protein 140                                       |
| 1,157490217 | 0,16935 | 1,121166078 | 0,02638 | ZNF142   | zinc finger protein 142                                       |
| 0,712025098 | 0,0767  | 0,825877665 | 0,00094 | ZNF146   | zinc finger protein 146                                       |
| 0,72597914  | 0,36703 | 0,827596816 | 0,02742 | ZNF148   | zinc finger protein 148                                       |
| 0,918912883 | 0,23932 | 0,866336856 | 0,00146 | ZNF148   | zinc finger protein 148                                       |
| 1,118837101 | 0,60063 | 1,308578071 | 0,0004  | ZNF169   | zinc finger protein 169                                       |
| 1,056285625 | 0,45319 | 0,912565489 | 0,02535 | ZNF17    | zinc finger protein 17                                        |
| 0,952637998 | 0,73184 | 0,802737389 | 0,00321 | ZNF17    | zinc finger protein 17                                        |
| 1,035264924 | 0,75314 | 1,113421618 | 0,01371 | ZNF175   | zinc finger protein 175                                       |
| 1,202469249 | 0,29419 | 1,150291893 | 0,01116 | ZNF177   | zinc finger protein 177                                       |
| 0,800514811 | 0,19542 | 0,734075318 | 0,00078 | ZNF180   | zinc finger protein 180                                       |
| 0,860352631 | 0,20436 | 0,793333843 | 0,02378 | ZNF182   | zinc finger protein 182                                       |
| 0,907519155 | 0,67686 | 0,758383773 | 0,02347 | ZNF184   | zinc finger protein 184                                       |
| 0,91319825  | 0,5485  | 0,84323111  | 0,00799 | ZNF207   | zinc finger protein 207                                       |
| 0,651122095 | 0,09637 | 0,77916458  | 0,02074 | ZNF207   | zinc finger protein 207                                       |
| 0,942784536 | 0,87427 | 0,621144141 | 0,00002 | ZNF207   | zinc finger protein 207                                       |
| 0,667111585 | 0,22948 | 0,755759964 | 0,01072 | ZNF207   | zinc finger protein 207                                       |
| 0,899378312 | 0,46074 | 0,802737389 | 0,00643 | ZNF207   | zinc finger protein 207                                       |
| 1,033114388 | 0,77163 | 1,167967395 | 0,03224 | ZNF211   | zinc finger protein 211                                       |
| 0,876605721 | 0,39375 | 0,883927531 | 0,02343 | ZNF212   | zinc finger protein 212                                       |
| 0,809442217 | 0,3389  | 0,855002178 | 0,03088 | ZNF224   | zinc finger protein 224                                       |
| 1,028113827 | 0,77688 | 1,123499903 | 0,01454 | ZNF224   | zinc finger protein 224                                       |
| 1,002776436 | 0,98525 | 0,779704843 | 0,0043  | ZNF226   | zinc finger protein 226                                       |
| 1,018891197 | 0,77683 | 1,088242442 | 0,02458 | ZNF226   | zinc finger protein 226                                       |
| 0,76154437  | 0,07261 | 0,816203046 | 0,03602 | ZNF227   | zinc finger protein 227                                       |
| 0,733058379 | 0,11346 | 0,814507563 | 0,00941 | ZNF23    | zinc finger protein 23 (KOX 16)                               |
| 0,940826108 | 0,45769 | 0,904379378 | 0,03854 | ZNF235   | zinc finger protein 235                                       |
| 1,028113827 | 0,89941 | 0,888842681 | 0,04802 | ZNF236   | zinc finger protein 236                                       |
| 1,044635763 | 0,83025 | 0,824733549 | 0,00661 | ZNF238   | zinc finger protein 238                                       |
| 1,179356592 | 0,11542 | 1,215036792 | 0,00927 | ZNF239   | zinc finger protein 239                                       |
| 0,821880187 | 0,49203 | 0,841479482 | 0,00044 | ZNF24    | zinc finger protein 24                                        |
| 0,819604608 | 0,17176 | 0,839731493 | 0,00548 | ZNF250   | zinc finger protein 250                                       |
| 0,918912883 | 0,51302 | 0,817335328 | 0,01925 | ZNF256   | zinc finger protein 256                                       |
| 0,744322628 | 0,27191 | 0,726482525 | 0,00229 | ZNF260   | zinc finger protein 260                                       |
| 0,765248385 | 0,12531 | 0,775393206 | 0,0036  | ZNF264   | zinc finger protein 264                                       |
| 0,832775771 | 0,37819 | 0,717474767 | 0,00109 | ZNF267   | zinc finger protein 267                                       |
| 0,906890329 | 0,63105 | 0,745872013 | 0,0003  | ZNF268   | zinc finger protein 268                                       |
| 1,054822317 | 0,8075  | 0,863339559 | 0,02659 | ZNF271   | zinc finger protein 271                                       |
| 0,872967591 | 0,46063 | 0,760489377 | 0,00095 | ZNF273   | zinc finger protein 273                                       |
| 0,844400887 | 0,19809 | 0,866937564 | 0,04504 | ZNF274   | zinc finger protein 274                                       |
| 1,021012126 | 0,88943 | 0,877821798 | 0,03532 | ZNF277   | zinc finger protein 277                                       |
| 0,773782497 | 0,20838 | 0,699792933 | 0,0242  | ZNF277   | zinc finger protein 277                                       |
| 0,717474767 | 0,06045 | 0,764718139 | 0,02164 | ZNF277   | zinc finger protein 277                                       |
| 1,223488041 | 0,07274 | 1,242288282 | 0,00244 | ZNF280B  | zinc finger protein 280B                                      |
| 1,065108203 | 0,73233 | 0,856781955 | 0,01643 | ZNF280C  | zinc finger protein 280C                                      |
| 1,019597683 | 0,90236 | 0,852044095 | 0,0227  | ZNF283   | zinc finger protein 283                                       |
| 1,024556823 | 0,88608 | 0,8362464   | 0,02055 | ZNF292   | zinc finger protein 292                                       |
| 1,077733145 | 0,84782 | 0,763129604 | 0,00013 | ZNF292   | zinc finger protein 292                                       |
| 0,798298386 | 0,37827 | 0,70759708  | 0,00012 | ZNF295   | zinc finger protein 295                                       |
| 0,859756486 | 0,49029 | 0,745872013 | 0,00051 | ZNF295   | zinc finger protein 295                                       |
| 1,065108203 | 0,43822 | 0,865136691 | 0,03628 | ZNF3     | zinc finger protein 3                                         |
| 0,874784765 | 0,39248 | 0,87417862  | 0,02781 | ZNF30    | zinc finger protein 30                                        |
| 0,772175133 | 0,12939 | 0,804408371 | 0,00039 | ZNF304   | zinc finger protein 304                                       |
| 1,200803427 | 0,11193 | 1,150291893 | 0,02546 | ZNF319   | zinc finger protein 319                                       |
| 0,771640088 | 0,33457 | 0,709561678 | 0,00047 | ZNF326   | zinc finger protein 326                                       |
| 1,243149669 | 0,30025 | 1,210833084 | 0,04397 | ZNF331   | zinc finger protein 331                                       |
| 1,068805991 | 0,46346 | 0,877213549 | 0,03391 | ZNF333   | zinc finger protein 333                                       |
| 0,950000383 | 0,73973 | 1,159899655 | 0,02704 | ZNF335   | zinc finger protein 335                                       |
| 1,059952783 | 0,66556 | 1,131314463 | 0,01151 | ZNF335   | zinc finger protein 335                                       |
| 0,61813763  | 0,06044 | 0,840313752 | 0,01639 | ZNF33A   | zinc finger protein 33A                                       |
| 1,198309021 | 0,33651 | 1,113421618 | 0,0456  | ZNF347   | zinc finger protein 347                                       |
| 0,917004043 | 0,40478 | 0,829894586 | 0,00798 | ZNF350   | zinc finger protein 350                                       |
| 1,074749173 | 0,3599  | 1,121943481 | 0,01138 | ZNF365   | zinc finger protein 365                                       |
| 0,860949188 | 0,60347 | 0,726986259 | 0,0005  | ZNF367   | zinc finger protein 367                                       |
| 1,229438867 | 0,19429 | 1,120389214 | 0,0095  | ZNF382   | zinc finger protein 382                                       |
| 0,964598185 | 0,79572 | 0,876605721 | 0,04622 | ZNF383   | zinc finger protein 383                                       |
| 1,179356592 | 0,11575 | 1,295940965 | 0,00021 | ZNF384   | zinc finger protein 384                                       |
| 0,97063447  | 0,75794 | 1,110338834 | 0,02953 | ZNF384   | zinc finger protein 384                                       |
| 1,072516617 | 0,49935 | 0,855002178 | 0,02325 | ZNF385B  | zinc finger protein 385B                                      |
| 0,936272247 | 0,35533 | 0,839149637 | 0,02304 | ZNF385B  | zinc finger protein 385B                                      |
| 1,043911927 | 0,84969 | 0,859160755 | 0,04468 | ZNF385B  | zinc finger protein 385B                                      |
| 1,046810282 | 0,57571 | 1,173648178 | 0,02968 | ZNF385C  | zinc finger protein 385C                                      |
| 0,78132788  | 0,14966 | 0,752623374 | 0,00008 | ZNF394   | zinc finger protein 394                                       |
| 0,890075733 | 0,3941  | 0,772175133 | 0,02412 | ZNF395   | zinc finger protein 395                                       |
| 0,853817714 | 0,17952 | 0,833931044 | 0,02396 | ZNF395   | zinc finger protein 395                                       |
| 0,792784137 | 0,28162 | 0,752623374 | 0,00277 | ZNF397   | zinc finger protein 397                                       |
| 1,099616149 | 0,21071 | 1,120389214 | 0,03585 | ZNF397   | zinc finger protein 397                                       |
| 0,610050255 | 0,11555 | 0,782411782 | 0,00101 | ZNF398   | zinc finger protein 398                                       |

|             |         |             |         |         |                               |
|-------------|---------|-------------|---------|---------|-------------------------------|
| 0,961927455 | 0,69152 | 0,859160755 | 0,03128 | ZNF407  | zinc finger protein 407       |
| 0,868140228 | 0,22198 | 0,890075733 | 0,01989 | ZNF410  | zinc finger protein 410       |
| 0,862143545 | 0,42859 | 0,867538687 | 0,03197 | ZNF410  | zinc finger protein 410       |
| 0,946057647 | 0,61777 | 0,860949188 | 0,0163  | ZNF416  | zinc finger protein 416       |
| 0,825877665 | 0,10321 | 0,777007269 | 0,00086 | ZNF416  | zinc finger protein 416       |
| 1,0132569   | 0,89651 | 1,145517898 | 0,00709 | ZNF419  | zinc finger protein 419       |
| 0,966606097 | 0,83734 | 0,840896415 | 0,02798 | ZNF420  | zinc finger protein 420       |
| 0,73153561  | 0,19679 | 0,808881348 | 0,03241 | ZNF426  | zinc finger protein 426       |
| 1,100378609 | 0,51849 | 1,237990291 | 0,00333 | ZNF428  | zinc finger protein 428       |
| 0,508739846 | 0,05073 | 0,630688704 | 0       | ZNF430  | zinc finger protein 430       |
| 0,69399636  | 0,11036 | 0,584793832 | 0,00017 | ZNF430  | zinc finger protein 430       |
| 0,825305409 | 0,37659 | 0,735093668 | 0,00097 | ZNF432  | zinc finger protein 432       |
| 1,061423209 | 0,58611 | 1,151089491 | 0,00889 | ZNF434  | zinc finger protein 434       |
| 0,671751713 | 0,16268 | 0,85027416  | 0,02545 | ZNF44   | zinc finger protein 44        |
| 0,956608158 | 0,76641 | 0,839731493 | 0,00836 | ZNF44   | zinc finger protein 44        |
| 0,841479482 | 0,438   | 0,680185426 | 0,0001  | ZNF440  | zinc finger protein 440       |
| 1,054822317 | 0,70987 | 0,886996305 | 0,04796 | ZNF441  | zinc finger protein 441       |
| 0,886381699 | 0,55434 | 0,806082831 | 0,0014  | ZNF443  | zinc finger protein 443       |
| 1,068065408 | 0,5246  | 1,199139914 | 0,02958 | ZNF444  | zinc finger protein 444       |
| 0,926588062 | 0,6798  | 0,799960128 | 0,02761 | ZNF45   | zinc finger protein 45        |
| 1,136816973 | 0,7066  | 0,866336856 | 0,03881 | ZNF451  | zinc finger protein 451       |
| 0,956608158 | 0,52561 | 1,114193651 | 0,01539 | ZNF461  | zinc finger protein 461       |
| 0,81056512  | 0,25209 | 0,741233505 | 0,00156 | ZNF462  | zinc finger protein 462       |
| 1,021720083 | 0,8718  | 1,343503426 | 0,00111 | ZNF467  | zinc finger protein 467       |
| 1,125058485 | 0,18769 | 1,256142381 | 0,00265 | ZNF479  | zinc finger protein 479       |
| 1,137605228 | 0,19401 | 1,136816973 | 0,02492 | ZNF48   | zinc finger protein 48        |
| 1,167967395 | 0,19807 | 1,272794935 | 0,00154 | ZNF488  | zinc finger protein 488       |
| 1,098092814 | 0,37024 | 1,167158102 | 0,01873 | ZNF491  | zinc finger protein 491       |
| 1,095052471 | 0,40042 | 1,139973273 | 0,03448 | ZNF496  | zinc finger protein 496       |
| 0,997231251 | 0,96934 | 1,153485605 | 0,03528 | ZNF496  | zinc finger protein 496       |
| 0,755759964 | 0,05128 | 0,824162085 | 0,01533 | ZNF502  | zinc finger protein 502       |
| 0,846158597 | 0,4682  | 0,755759964 | 0,00061 | ZNF507  | zinc finger protein 507       |
| 0,943438251 | 0,62579 | 0,822450069 | 0,01949 | ZNF511  | zinc finger protein 511       |
| 1,10343374  | 0,41098 | 1,172022284 | 0,02146 | ZNF512  | zinc finger protein 512       |
| 0,71400199  | 0,20878 | 0,816768991 | 0,012   | ZNF512B | zinc finger protein 512B      |
| 0,643048742 | 0,11243 | 0,823020345 | 0,01017 | ZNF514  | zinc finger protein 514       |
| 0,706127202 | 0,05223 | 0,763129604 | 0,00018 | ZNF516  | zinc finger protein 516       |
| 0,980779004 | 0,84176 | 1,154285418 | 0,0107  | ZNF517  | zinc finger protein 517       |
| 1,29056249  | 0,08277 | 1,132883885 | 0,02365 | ZNF518B | zinc finger protein 518B      |
| 1,23370717  | 0,13186 | 1,185092771 | 0,00428 | ZNF527  | zinc finger protein 527       |
| 1,000693387 | 0,99868 | 0,846158597 | 0,03898 | ZNF529  | zinc finger protein 529       |
| 1,052631155 | 0,54971 | 0,870550563 | 0,01543 | ZNF536  | zinc finger protein 536       |
| 1,142346247 | 0,20673 | 1,125838586 | 0,03    | ZNF541  | zinc finger protein 541       |
| 0,808881348 | 0,08978 | 0,898755127 | 0,04155 | ZNF544  | zinc finger protein 544       |
| 1,121166078 | 0,49706 | 0,823591017 | 0,00213 | ZNF547  | zinc finger protein 547       |
| 1,180992661 | 0,08775 | 1,355664327 | 0,00002 | ZNF548  | zinc finger protein 548       |
| 1,371733289 | 0,09352 | 1,223488041 | 0,00882 | ZNF550  | zinc finger protein 550       |
| 0,737645729 | 0,26086 | 0,751059963 | 0,00011 | ZNF551  | zinc finger protein 551       |
| 1,107264584 | 0,26627 | 0,87417862  | 0,01921 | ZNF555  | zinc finger protein 555       |
| 1,039579435 | 0,66567 | 0,873572896 | 0,00673 | ZNF556  | zinc finger protein 556       |
| 0,804966138 | 0,1014  | 0,781869643 | 0,00337 | ZNF557  | zinc finger protein 557       |
| 1,128964405 | 0,19157 | 1,220946513 | 0,00063 | ZNF557  | zinc finger protein 557       |
| 0,787853886 | 0,29614 | 0,76418826  | 0,00041 | ZNF561  | zinc finger protein 561       |
| 1,030968319 | 0,90823 | 0,728499557 | 0,00626 | ZNF567  | zinc finger protein 567       |
| 0,67877249  | 0,0647  | 0,655651007 | 0,00084 | ZNF567  | zinc finger protein 567       |
| 1,059952783 | 0,57973 | 0,872967591 | 0,04724 | ZNF568  | zinc finger protein 568       |
| 1,100378609 | 0,65963 | 0,768437591 | 0,00142 | ZNF571  | zinc finger protein 571       |
| 1,127400412 | 0,23741 | 1,153485605 | 0,0044  | ZNF572  | zinc finger protein 572       |
| 1,118837101 | 0,15209 | 1,108032348 | 0,01097 | ZNF573  | zinc finger protein 573       |
| 1,254402205 | 0,07399 | 1,139973273 | 0,03779 | ZNF583  | zinc finger protein 583       |
| 0,865736566 | 0,10177 | 0,842062954 | 0,00151 | ZNF584  | zinc finger protein 584       |
| 0,953959551 | 0,82324 | 0,803850991 | 0,0095  | ZNF585A | zinc finger protein 585A      |
| 1,128964405 | 0,34861 | 1,318593614 | 0       | ZNF598  | zinc finger protein 598       |
| 0,846745312 | 0,28421 | 0,846745312 | 0,02345 | ZNF600  | zinc finger protein 600       |
| 1,134455485 | 0,31274 | 1,204972315 | 0,02845 | ZNF608  | zinc finger protein 608       |
| 1,131314463 | 0,54966 | 0,868742185 | 0,03332 | ZNF614  | zinc finger protein 614       |
| 0,879039561 | 0,40342 | 0,881480158 | 0,0304  | ZNF621  | zinc finger protein 621       |
| 0,880259014 | 0,47595 | 0,759435845 | 0,00325 | ZNF621  | zinc finger protein 621       |
| 0,927230546 | 0,47221 | 0,837987135 | 0,00571 | ZNF624  | zinc finger protein 624       |
| 1,231144413 | 0,10483 | 1,115739322 | 0,02439 | ZNF638  | zinc finger protein 638       |
| 1,009751298 | 0,93329 | 0,85027416  | 0,00109 | ZNF639  | zinc finger protein 639       |
| 0,859160755 | 0,41404 | 0,776468875 | 0,00153 | ZNF639  | zinc finger protein 639       |
| 0,885153765 | 0,62151 | 0,693515485 | 0,0001  | ZNF639  | zinc finger protein 639       |
| 0,84264683  | 0,36375 | 0,750539549 | 0,00151 | ZNF644  | zinc finger protein 644       |
| 1,044635763 | 0,81294 | 0,820741609 | 0,03833 | ZNF644  | zinc finger protein 644       |
| 1,130530567 | 0,09951 | 1,121166078 | 0,01659 | ZNF645  | zinc finger protein 645       |
| 0,876605721 | 0,51226 | 0,782954296 | 0,00166 | ZNF654  | zinc finger protein 654       |
| 0,886381699 | 0,6268  | 0,762072415 | 0,00625 | ZNF654  | zinc finger protein 654       |
| 0,723969086 | 0,07007 | 0,76950361  | 0,0086  | ZNF655  | zinc finger protein 655       |
| 0,739693755 | 0,154   | 0,66158572  | 0,00046 | ZNF658  | zinc finger protein 658       |
| 1,058484395 | 0,76653 | 0,791685866 | 0,00087 | ZNF664  | zinc finger protein 664       |
| 0,990342872 | 0,90299 | 1,104198847 | 0,04541 | ZNF664  | zinc finger protein 664       |
| 1,033830736 | 0,76476 | 1,194163187 | 0,01097 | ZNF667  | zinc finger protein 667       |
| 0,984866443 | 0,81999 | 0,901875378 | 0,03022 | ZNF668  | zinc finger protein 668       |
| 1,219255094 | 0,0636  | 1,227735684 | 0,00061 | ZNF671  | zinc finger protein 671       |
| 1,051172909 | 0,74182 | 1,152686347 | 0,02389 | ZNF673  | zinc finger family member 673 |
| 1,004167543 | 0,97874 | 0,852044095 | 0,02412 | ZNF680  | zinc finger protein 680       |
| 0,718968266 | 0,0841  | 0,658383461 | 0,00021 | ZNF681  | zinc finger protein 681       |
| 0,879039561 | 0,15176 | 0,862143545 | 0,01652 | ZNF682  | zinc finger protein 682       |
| 0,939522749 | 0,79061 | 0,744838732 | 0,01738 | ZNF682  | zinc finger protein 682       |
| 1,249196126 | 0,06976 | 1,21335356  | 0,0254  | ZNF687  | zinc finger protein 687       |
| 1,310393404 | 0,14145 | 1,156688184 | 0,03468 | ZNF697  | zinc finger protein 697       |
| 0,764718139 | 0,19299 | 0,753145233 | 0,00267 | ZNF700  | zinc finger protein 700       |
| 1,205807828 | 0,06478 | 1,17772279  | 0,00101 | ZNF701  | zinc finger protein 701       |
| 1,036701101 | 0,69452 | 1,109569472 | 0,03963 | ZNF704  | zinc finger protein 704       |
| 0,942784536 | 0,55361 | 1,185092771 | 0,00256 | ZNF704  | zinc finger protein 704       |
| 1,054822317 | 0,54364 | 1,135242102 | 0,01836 | ZNF705G | zinc finger protein 705G      |
| 0,784040454 | 0,36847 | 0,773782497 | 0,0081  | ZNF706  | zinc finger protein 706       |
| 0,979420298 | 0,82512 | 1,125838586 | 0,03884 | ZNF710  | zinc finger protein 710       |
| 1,017479692 | 0,80751 | 0,830470024 | 0,00892 | ZNF710  | zinc finger protein 710       |
| 0,851453708 | 0,11892 | 0,862143545 | 0,00909 | ZNF710  | zinc finger protein 710       |
| 0,68491649  | 0,2051  | 0,645281245 | 0,00188 | ZNF711  | zinc finger protein 711       |
| 1,138394029 | 0,1539  | 1,135242102 | 0,01067 | ZNF718  | zinc finger protein 718       |
| 0,892546971 | 0,54393 | 0,806641759 | 0,00848 | ZNF720  | zinc finger protein 720       |

|             |         |             |         |           |                                                                       |
|-------------|---------|-------------|---------|-----------|-----------------------------------------------------------------------|
| 1,052631155 | 0,59649 | 1,147107024 | 0,00263 | ZNF736    | zinc finger protein 736                                               |
| 0,927230546 | 0,49965 | 1,148698355 | 0,00515 | ZNF740    | zinc finger protein 740                                               |
| 1,127400412 | 0,11156 | 1,237990291 | 0,00368 | ZNF747    | zinc finger protein 747                                               |
| 1,301341855 | 0,10384 | 1,125838586 | 0,03995 | ZNF747    | zinc finger protein 747                                               |
| 1,121166078 | 0,47787 | 0,820741609 | 0,00172 | ZNF765    | zinc finger protein 765                                               |
| 0,917639882 | 0,61731 | 0,816203046 | 0,03301 | ZNF765    | zinc finger protein 765                                               |
| 0,855595026 | 0,31714 | 0,875998315 | 0,01397 | ZNF766    | zinc finger protein 766                                               |
| 0,991716731 | 0,95191 | 0,727994774 | 0,00006 | ZNF77     | zinc finger protein 77                                                |
| 0,654742712 | 0,093   | 0,636838738 | 0,00402 | ZNF770    | zinc finger protein 770                                               |
| 1,160703914 | 0,2412  | 1,138394029 | 0,01958 | ZNF775    | zinc finger protein 775                                               |
| 1,099616149 | 0,36841 | 1,154285418 | 0,01966 | ZNF775    | zinc finger protein 775                                               |
| 1,114193651 | 0,36126 | 1,135242102 | 0,0328  | ZNF780B   | zinc finger protein 780B                                              |
| 0,906261938 | 0,44976 | 0,787307977 | 0,03528 | ZNF782    | zinc finger protein 782                                               |
| 0,701735863 | 0,05234 | 0,770037174 | 0,00916 | ZNF785    | zinc finger protein 785                                               |
| 0,992404375 | 0,95516 | 1,153485605 | 0,00462 | ZNF787    | zinc finger protein 787                                               |
| 1,224336392 | 0,06533 | 1,129747215 | 0,00138 | ZNF80     | zinc finger protein 80                                                |
| 0,86154616  | 0,37452 | 0,743806881 | 0,00003 | ZNF805    | zinc finger protein 805                                               |
| 0,872967591 | 0,09025 | 0,838568184 | 0,00357 | ZNF805    | zinc finger protein 805                                               |
| 0,648419777 | 0,09816 | 0,714992493 | 0,0029  | ZNF814    | zinc finger protein 814                                               |
| 1,055553718 | 0,54514 | 1,168777249 | 0,00181 | ZNF814    | zinc finger protein 814                                               |
| 0,892546971 | 0,57702 | 0,688247801 | 0,00484 | ZNF814    | zinc finger protein 814                                               |
| 0,940826108 | 0,60561 | 1,379360922 | 0,00208 | ZNF827    | zinc finger protein 827                                               |
| 0,582770599 | 0,07965 | 0,586824089 | 0,00064 | ZNF83     | zinc finger protein 83                                                |
| 0,783497187 | 0,11315 | 0,777007269 | 0,0002  | ZNF830    | zinc finger protein 830                                               |
| 1,214194884 | 0,07548 | 1,181811547 | 0,00102 | ZNF835    | zinc finger protein 835                                               |
| 1,101905116 | 0,37818 | 1,158292806 | 0,02976 | ZNF837    | zinc finger protein 837                                               |
| 1,055553718 | 0,60263 | 1,199971382 | 0,0107  | ZNF839    | zinc finger protein 839                                               |
| 1,139973273 | 0,23726 | 1,175276328 | 0,00422 | ZNF843    | zinc finger protein 843                                               |
| 0,898755127 | 0,46606 | 0,821310701 | 0,00245 | ZNF85     | zinc finger protein 85                                                |
| 1,021720083 | 0,9163  | 0,906261938 | 0,03714 | ZNF850    | zinc finger protein 850                                               |
| 0,977385766 | 0,85843 | 1,112650121 | 0,0146  | ZNF853    | zinc finger protein 853                                               |
| 1,164733586 | 0,20072 | 1,128182137 | 0,04974 | ZNF861P   | zinc finger protein 861, pseudogene                                   |
| 1,038139271 | 0,65846 | 1,120389214 | 0,02576 | ZNF862    | zinc finger protein 862                                               |
| 0,951977908 | 0,83286 | 0,797192477 | 0,00941 | ZNF91     | zinc finger protein 91                                                |
| 1,132098902 | 0,51135 | 0,815072332 | 0,01615 | ZNF92     | zinc finger protein 92                                                |
| 1,025978145 | 0,78795 | 1,172022284 | 0,00191 | ZNF93     | zinc finger protein 93                                                |
| 1,002081605 | 0,98783 | 1,128964405 | 0,02662 | ZNF91     | zinc finger, NFX1-type containing 1                                   |
| 0,804408371 | 0,1011  | 0,854409741 | 0,01725 | ZNHIT3    | zinc finger, HIT-type containing 3                                    |
| 0,706127202 | 0,07348 | 0,77916458  | 0,00103 | ZNHIT6    | zinc finger, HIT-type containing 6                                    |
| 0,975355462 | 0,78982 | 0,843815796 | 0,01733 | ZNHIT6    | zinc finger, HIT-type containing 6                                    |
| 0,968618189 | 0,64519 | 0,93109482  | 0,04463 | ZNRD1-AS1 | ZNRD1 antisense RNA 1 (non-protein coding)                            |
| 0,895025071 | 0,3712  | 0,685391402 | 0,00003 | ZNRF1     | zinc and ring finger 1                                                |
| 0,973329374 | 0,87596 | 0,735093668 | 0,00018 | ZNRF2     | zinc and ring finger 2                                                |
| 1,001387256 | 0,98976 | 1,224336392 | 0,00034 | ZNRF4     | zinc and ring finger 4                                                |
| 0,994470169 | 0,94126 | 1,219255094 | 0,00034 | ZP4       | zona pellucida glycoprotein 4                                         |
| 0,746389192 | 0,10733 | 0,762072415 | 0,00093 | ZRANB1    | zinc finger, RAN-binding domain containing 1                          |
| 0,950659101 | 0,76877 | 1,115739322 | 0,03341 | ZRSR2     | zinc finger (CCCH type), RNA-binding motif and serine/arginine rich 2 |
| 0,987600861 | 0,93761 | 1,147902412 | 0,04901 | ZRSR2     | zinc finger (CCCH type), RNA-binding motif and serine/arginine rich 2 |
| 1,154285418 | 0,14012 | 1,161508732 | 0,01164 | ZSCAN1    | zinc finger and SCAN domain containing 1                              |
| 0,920187651 | 0,30739 | 1,155085785 | 0,01188 | ZSCAN10   | zinc finger and SCAN domain containing 10                             |
| 1,011853201 | 0,8748  | 1,260503392 | 0,00064 | ZSCAN10   | zinc finger and SCAN domain containing 10                             |
| 1,111108729 | 0,37662 | 1,321338406 | 0,00011 | ZSCAN12P1 | zinc finger and SCAN domain containing 12 pseudogene 1                |
| 1,104964485 | 0,19708 | 1,139973273 | 0,01282 | ZSCAN20   | zinc finger and SCAN domain containing 20                             |
| 1,115739322 | 0,21314 | 1,135242102 | 0,01505 | ZSWIM1    | zinc finger, SWIM-type containing 1                                   |
| 0,851453708 | 0,40269 | 0,872362706 | 0,01641 | ZSWIM6    | zinc finger, SWIM-type containing 6                                   |
| 0,797192477 | 0,28685 | 0,763658749 | 0,00265 | ZUFSP     | zinc finger with UFM1-specific peptidase domain                       |
| 0,645728675 | 0,15731 | 0,731028724 | 0,00056 | ZWILCH    | Zwilch, kinetochore associated, homolog (Drosophila)                  |
| 0,97063447  | 0,89577 | 0,81056512  | 0,01927 | ZXDB      | zinc finger, X-linked, duplicated B                                   |
| 0,859756486 | 0,22    | 0,871154192 | 0,00421 | ZXDC      | ZXD family zinc finger C                                              |
| 0,770571108 | 0,07485 | 0,729004689 | 0,00054 | ZXDC      | ZXD family zinc finger C                                              |
| 0,948684315 | 0,8436  | 0,829319546 | 0,0356  | ZYG11B    | zyg-11 homolog B (C. elegans)                                         |
| 0,718968266 | 0,28198 | 0,59790898  | 0,00025 | ZYG11B    | zyg-11 homolog B (C. elegans)                                         |
| 1,080725402 | 0,78683 | 1,366987452 | 0,02853 | ZYX       | zyxin                                                                 |
| 1,047536127 | 0,63034 | 1,102669163 | 0,03176 | ZZEF1     | zinc finger, ZZ-type with EF-hand domain 1                            |
| 0,795536484 | 0,33449 | 0,795536484 | 0,00789 | ZZZ3      | zinc finger, ZZ-type containing 3                                     |
