# Supplementary material
Source: PubMed Central journal article supplement (PMC3620697)
Supplement: NIHMS432523-supplement-4.pdf [file NIHMS432523-supplement-4.pdf]

**Panel 1: Genes differentially regulated (fold-change > 2; FDR (false discovery rate) < 0.05) in murine DCs infected with *Porphyromonas gingivalis* versus untreated controls.**

| Name                                                                               | FC          | P.Value  | adj.P.Val | B           |
|------------------------------------------------------------------------------------|-------------|----------|-----------|-------------|
| chemokine (C-X-C motif) ligand 1                                                   | 36,49360867 | 1,21E-15 | 2,48E-11  | 24,28412569 |
| chemokine (C-X-C motif) ligand 2                                                   | 40,94660632 | 5,62E-15 | 5,77E-11  | 23,25377754 |
| lipocalin 2                                                                        | 135,1477935 | 1,15E-14 | 7,84E-11  | 22,74738129 |
| serum amyloid A 3                                                                  | 12,69866812 | 5,96E-14 | 3,06E-10  | 21,50895641 |
| chemokine (C-X-C motif) ligand 2                                                   | 40,15035306 | 8,75E-14 | 3,60E-10  | 21,20849533 |
| formyl peptide receptor 2                                                          | 13,28609139 | 3,73E-13 | 1,28E-09  | 20,03331566 |
| interleukin 1 beta                                                                 | 9,577598018 | 6,10E-13 | 1,79E-09  | 19,62140532 |
| caveolin 1, caveolae protein                                                       | 8,784056721 | 1,03E-12 | 2,63E-09  | 19,18006008 |
| S100 calcium binding protein A8 (calgranulin A)                                    | 8,260045702 | 3,68E-12 | 8,00E-09  | 18,0648812  |
| secretory leukocyte peptidase inhibitor                                            | 10,28186615 | 4,04E-12 | 8,00E-09  | 17,98306196 |
| G protein-coupled receptor 84                                                      | 9,462765364 | 4,34E-12 | 8,00E-09  | 17,91850737 |
| vanin 3                                                                            | 9,873770458 | 5,03E-12 | 8,00E-09  | 17,78643644 |
| acid phosphatase, prostate                                                         | 14,52879426 | 5,23E-12 | 8,00E-09  | 17,75252268 |
| chemokine (C-X-C motif) ligand 5                                                   | 42,6651476  | 5,45E-12 | 8,00E-09  | 17,71481309 |
| orosomucoid 1                                                                      | 8,567674194 | 6,50E-12 | 8,63E-09  | 17,55650728 |
| solute carrier family 7 (cationic amino acid transporter, y+ system), member 2     | 8,66276061  | 6,96E-12 | 8,63E-09  | 17,49555432 |
| pentraxin related gene                                                             | 6,135368339 | 7,14E-12 | 8,63E-09  | 17,47266686 |
| complement component 1, q subcomponent, C chain                                    | 0,13653181  | 7,73E-12 | 8,82E-09  | 17,40063567 |
| interleukin 12a                                                                    | 11,57431483 | 8,18E-12 | 8,84E-09  | 17,34975414 |
| interleukin 1 alpha                                                                | 9,40419512  | 1,01E-11 | 1,02E-08  | 17,15770222 |
| pro-platelet basic protein                                                         | 8,98669363  | 1,08E-11 | 1,02E-08  | 17,10151129 |
| immunosuppressive gene 1                                                           | 6,120023011 | 1,15E-11 | 1,02E-08  | 17,04082211 |
| tumor necrosis factor                                                              | 7,897380501 | 1,22E-11 | 1,02E-08  | 16,98479883 |
| chemokine (C-C motif) ligand 6                                                     | 0,119961267 | 1,23E-11 | 1,02E-08  | 16,9810357  |
| immunosuppressive gene 1                                                           | 8,036136987 | 1,24E-11 | 1,02E-08  | 16,97027768 |
| tumor necrosis factor                                                              | 8,060259039 | 1,68E-11 | 1,29E-08  | 16,69623228 |
| macrophage receptor with collagenous structure                                     | 16,04715478 | 1,70E-11 | 1,29E-08  | 16,68317457 |
| C-type lectin domain family 4, member e                                            | 9,330254823 | 1,81E-11 | 1,32E-08  | 16,62761067 |
| lymphocyte antigen 6 complex, locus C1                                             | 7,480602541 | 2,02E-11 | 1,43E-08  | 16,52587084 |
| interleukin 1 alpha                                                                | 9,805280995 | 2,09E-11 | 1,43E-08  | 16,49318607 |
| nuclear factor of kappa light polypeptide gene enhancer in B-cells inhibitor, zeta | 6,190158544 | 2,29E-11 | 1,52E-08  | 16,40718895 |
| pro-platelet basic protein                                                         | 11,40469849 | 2,78E-11 | 1,78E-08  | 16,22888569 |
| membrane-spanning 4-domains, subfamily A, member 6D                                | 7,032013285 | 3,03E-11 | 1,88E-08  | 16,14986476 |
| complement component 1, q subcomponent, beta polypeptide                           | 0,169274428 | 3,16E-11 | 1,89E-08  | 16,10848465 |
| potassium channel tetramerisation domain containing 1                              | 9,251708115 | 3,22E-11 | 1,89E-08  | 16,09198939 |
| hydroxysteroid 11-beta dehydrogenase 1                                             | 5,074226866 | 3,77E-11 | 2,15E-08  | 15,94507844 |
| complement factor B                                                                | 5,926791593 | 3,94E-11 | 2,16E-08  | 15,90486357 |
| interleukin 6                                                                      | 10,80995476 | 4,08E-11 | 2,16E-08  | 15,87214559 |
| suppressor of cytokine signaling 3                                                 | 7,60480038  | 4,19E-11 | 2,16E-08  | 15,84706115 |
| T cell-interacting, activating receptor on myeloid cells 1                         | 7,596514139 | 4,25E-11 | 2,16E-08  | 15,83250021 |
| growth arrest specific 6                                                           | 0,190094767 | 4,31E-11 | 2,16E-08  | 15,82059975 |
| DNA (cytosine-5-)-methyltransferase 3-like                                         | 5,77054562  | 4,52E-11 | 2,18E-08  | 15,7754381  |
| vanin 3                                                                            | 10,89475027 | 4,55E-11 | 2,18E-08  | 15,76886917 |
| acid phosphatase, prostate                                                         | 9,395135867 | 4,68E-11 | 2,19E-08  | 15,74274847 |
| signal transducing adaptor family member 1                                         | 4,97167757  | 5,46E-11 | 2,49E-08  | 15,59824718 |
| chemokine (C-C motif) receptor 5                                                   | 0,185472894 | 6,78E-11 | 3,03E-08  | 15,39545518 |
| phospholipase A2, group IVF                                                        | 5,095641502 | 7,59E-11 | 3,32E-08  | 15,28874486 |
| sphingomyelin phosphodiesterase, acid-like 3B                                      | 4,407203779 | 1,07E-10 | 4,56E-08  | 14,96695083 |
| alanyl (membrane) aminopeptidase                                                   | 0,191999295 | 1,60E-10 | 6,64E-08  | 14,58112726 |
| haptoglobin                                                                        | 5,54670691  | 1,62E-10 | 6,64E-08  | 14,57008954 |
| phosphatidic acid phosphatase type 2A                                              | 6,128241238 | 2,07E-10 | 8,18E-08  | 14,33437902 |
| apolipoprotein E                                                                   | 0,153260954 | 2,07E-10 | 8,18E-08  | 14,33232983 |
| pentraxin related gene                                                             | 7,205773948 | 2,12E-10 | 8,20E-08  | 14,30863794 |
| formyl peptide receptor 1                                                          | 7,923736502 | 2,16E-10 | 8,20E-08  | 14,29413623 |
| leucine rich repeat containing 14B                                                 | 0,132236441 | 2,47E-10 | 9,22E-08  | 14,16363791 |
| wingless-related MMTV integration site 6                                           | 5,020831366 | 2,59E-10 | 9,49E-08  | 14,1193312  |
| EGF-like module containing, mucin-like, hormone receptor-like sequence 1           | 5,111809001 | 2,80E-10 | 9,99E-08  | 14,0436671  |
| DNA (cytosine-5-)-methyltransferase 3-like                                         | 5,245216189 | 2,82E-10 | 9,99E-08  | 14,03566382 |
| haptoglobin                                                                        | 6,116319924 | 2,93E-10 | 1,02E-07  | 13,99765059 |
| receptor (calcitonin) activity modifying protein 1                                 | 0,194725095 | 3,18E-10 | 1,09E-07  | 13,92108831 |
| chemokine (C-C motif) ligand 3                                                     | 5,393205518 | 3,51E-10 | 1,18E-07  | 13,8236818  |
| G protein-coupled receptor 84                                                      | 5,738654836 | 3,55E-10 | 1,18E-07  | 13,81246416 |
| tissue inhibitor of metalloproteinase 2                                            | 0,223710058 | 4,48E-10 | 1,46E-07  | 13,58751741 |
| EGF-like module containing, mucin-like, hormone receptor-like sequence 1           | 4,308122837 | 5,08E-10 | 1,61E-07  | 13,46598563 |
| haptoglobin                                                                        | 6,562694353 | 5,08E-10 | 1,61E-07  | 13,46566972 |
| paired immunoglobulin-like type 2 receptor alpha                                   | 5,45147915  | 5,22E-10 | 1,61E-07  | 13,4391553  |
| solute carrier family 46, member 3                                                 | 0,26243123  | 5,26E-10 | 1,61E-07  | 13,43178273 |
| C-type lectin domain family 4, member e                                            | 8,872305771 | 5,40E-10 | 1,63E-07  | 13,40656338 |
| solute carrier family 6 (neurotransmitter transporter, glycine), member 9          | 4,995540096 | 5,75E-10 | 1,71E-07  | 13,34528632 |
| endothelin receptor type B                                                         | 5,883503163 | 6,18E-10 | 1,81E-07  | 13,27594238 |
| acyl-CoA synthetase long-chain family member 1                                     | 5,697433405 | 7,24E-10 | 2,09E-07  | 13,12162114 |
| diacylglycerol lipase, beta                                                        | 0,211162708 | 7,86E-10 | 2,24E-07  | 13,04060935 |
| insulin-like growth factor 1                                                       | 0,256291507 | 8,54E-10 | 2,40E-07  | 12,96007146 |
| Mediterranean fever                                                                | 3,610141837 | 9,00E-10 | 2,50E-07  | 12,90818897 |
| mannose receptor, C type 1                                                         | 0,123130803 | 9,37E-10 | 2,57E-07  | 12,86944108 |
| phospholipase D family, member 4                                                   | 0,266430179 | 9,80E-10 | 2,65E-07  | 12,82571912 |
| angiotensin-like 4                                                                 | 0,159976957 | 1,12E-09 | 3,00E-07  | 12,69039304 |
| interleukin-1 receptor-associated kinase 3                                         | 3,561288137 | 1,16E-09 | 3,05E-07  | 12,66214919 |

|                                                                                |             |          |          |             |
|--------------------------------------------------------------------------------|-------------|----------|----------|-------------|
| CD93 antigen                                                                   | 0,200873389 | 1,21E-09 | 3,13E-07 | 12,61566479 |
| chemokine (C-C motif) receptor 5                                               | 0,209020948 | 1,22E-09 | 3,13E-07 | 12,61164394 |
| CD28 antigen                                                                   | 0,269532991 | 1,24E-09 | 3,14E-07 | 12,59508465 |
| peroxisome proliferator activated receptor gamma                               | 0,18228124  | 1,62E-09 | 4,04E-07 | 12,32976064 |
| chemokine (C-C motif) ligand 17                                                | 4,167212606 | 1,63E-09 | 4,04E-07 | 12,32375886 |
| insulin-like growth factor 1                                                   | 0,212404526 | 1,73E-09 | 4,23E-07 | 12,26798626 |
| microfibrillar-associated protein 3-like                                       | 4,181446767 | 1,96E-09 | 4,74E-07 | 12,14271031 |
| Epstein-Barr virus induced gene 3                                              | 3,066595952 | 2,33E-09 | 5,58E-07 | 11,97111859 |
| G protein-coupled receptor 18                                                  | 3,908985447 | 2,72E-09 | 6,42E-07 | 11,82034307 |
| family with sequence similarity 198, member B                                  | 0,162332618 | 2,78E-09 | 6,42E-07 | 11,80000783 |
| cyclin-dependent kinase inhibitor 1C (P57)                                     | 0,218459148 | 2,80E-09 | 6,42E-07 | 11,79057144 |
| solute carrier family 7 (cationic amino acid transporter, y+ system), member 2 | 4,40639652  | 2,81E-09 | 6,42E-07 | 11,78720682 |
| membrane-spanning 4-domains, subfamily A, member 6D                            | 4,568742993 | 2,86E-09 | 6,46E-07 | 11,76942388 |
| linker for activation of T cells family, member 2                              | 0,294566239 | 3,08E-09 | 6,87E-07 | 11,69818775 |
| insulin-like growth factor 1                                                   | 0,29009444  | 3,17E-09 | 7,00E-07 | 11,66835582 |
| CD14 antigen                                                                   | 3,748252202 | 3,42E-09 | 7,47E-07 | 11,59341093 |
| glutathione S-transferase, alpha 3                                             | 3,653904219 | 3,51E-09 | 7,60E-07 | 11,56593982 |
| chemokine (C-C motif) receptor 5                                               | 0,219549213 | 3,56E-09 | 7,62E-07 | 11,55253771 |
| paired immunoglobulin-like type 2 receptor beta 1                              | 4,147703911 | 3,63E-09 | 7,70E-07 | 11,53295533 |
| synaptogyrin 1                                                                 | 0,2402496   | 3,77E-09 | 7,91E-07 | 11,49603581 |
| thymidylate synthase                                                           | 3,315081074 | 4,17E-09 | 8,66E-07 | 11,39509025 |
| EGF-like module containing, mucin-like, hormone receptor-like sequence 1       | 5,036422633 | 4,68E-09 | 9,52E-07 | 11,28130006 |
| myosin, light polypeptide kinase                                               | 3,319374096 | 4,68E-09 | 9,52E-07 | 11,28127693 |
| hydroxysteroid 11-beta dehydrogenase 1                                         | 5,809569362 | 5,22E-09 | 1,05E-06 | 11,17271189 |
| alcohol dehydrogenase 7 (class IV), mu or sigma polypeptide                    | 7,719916031 | 5,31E-09 | 1,05E-06 | 11,15616209 |
| RIKEN cDNA 1810033B17 gene                                                     | 3,121866975 | 5,32E-09 | 1,05E-06 | 11,15284487 |
| interleukin 1 receptor, type II                                                | 3,443160655 | 5,38E-09 | 1,05E-06 | 11,14316575 |
| synaptogyrin 1                                                                 | 0,206101569 | 5,41E-09 | 1,05E-06 | 11,13687785 |
| zinc finger CCHC type containing 12A                                           | 3,462737158 | 5,52E-09 | 1,06E-06 | 11,11670023 |
| spermatogenesis associated 13                                                  | 3,092339285 | 5,60E-09 | 1,06E-06 | 11,10311118 |
| transmembrane protein 154                                                      | 0,264468389 | 6,85E-09 | 1,29E-06 | 10,90138392 |
| cannabinoid receptor 2 (macrophage)                                            | 0,280428531 | 7,77E-09 | 1,45E-06 | 10,7758889  |
| ankyrin repeat domain 37                                                       | 9,514330679 | 7,94E-09 | 1,47E-06 | 10,75367321 |
| hydroxysteroid 11-beta dehydrogenase 1                                         | 4,582997538 | 8,37E-09 | 1,54E-06 | 10,70082967 |
| cannabinoid receptor 2 (macrophage)                                            | 0,334738867 | 8,96E-09 | 1,63E-06 | 10,63361412 |
| linker for activation of T cells family, member 2                              | 0,337688468 | 9,29E-09 | 1,67E-06 | 10,59743998 |
| agrin                                                                          | 3,06977191  | 9,46E-09 | 1,69E-06 | 10,57892949 |
| sushi domain containing 2                                                      | 3,336198686 | 9,60E-09 | 1,70E-06 | 10,56380522 |
| guanylate binding protein 2                                                    | 3,140905556 | 1,05E-08 | 1,82E-06 | 10,47782426 |
| spinster homolog 3 (Drosophila)                                                | 3,935513526 | 1,05E-08 | 1,82E-06 | 10,47536913 |
| src-like adaptor                                                               | 3,475691724 | 1,05E-08 | 1,82E-06 | 10,47067587 |
| wingless-related MMTV integration site 6                                       | 5,387753175 | 1,12E-08 | 1,92E-06 | 10,40967316 |
| adenosine monophosphate deaminase 3                                            | 3,533092393 | 1,15E-08 | 1,94E-06 | 10,38622906 |
| serine (or cysteine) peptidase inhibitor, clade E, member 2                    | 3,370968262 | 1,15E-08 | 1,94E-06 | 10,3801593  |
| chemokine (C-C motif) ligand 9                                                 | 0,339980368 | 1,20E-08 | 1,99E-06 | 10,34317803 |
| Fc receptor, IgG, low affinity IV                                              | 0,345331088 | 1,20E-08 | 1,99E-06 | 10,33998145 |
| microsomal glutathione S-transferase 2                                         | 3,743883751 | 1,24E-08 | 2,03E-06 | 10,30915011 |
| HOP homeobox                                                                   | 3,066161847 | 1,30E-08 | 2,13E-06 | 10,25644295 |
| cytochrome P450, family 1, subfamily b, polypeptide 1                          | 3,662577508 | 1,36E-08 | 2,20E-06 | 10,21447921 |
| dual specificity phosphatase 4                                                 | 3,57753916  | 1,43E-08 | 2,30E-06 | 10,1613217  |
| C-type lectin domain family 4, member a1                                       | 3,197732054 | 1,54E-08 | 2,45E-06 | 10,09022557 |
| cyclin D2                                                                      | 4,214370438 | 1,56E-08 | 2,47E-06 | 10,07570836 |
| uridine phosphorylase 1                                                        | 4,016053306 | 1,63E-08 | 2,55E-06 | 10,03170433 |
| RIKEN cDNA 1810011H11 gene                                                     | 0,307365086 | 1,65E-08 | 2,55E-06 | 10,0192663  |
| RIKEN cDNA 1810011H11 gene                                                     | 0,234336279 | 1,65E-08 | 2,55E-06 | 10,01827943 |
| selenoprotein P, plasma, 1                                                     | 0,283031408 | 1,70E-08 | 2,58E-06 | 9,993101465 |
| triggering receptor expressed on myeloid cells 3                               | 7,566934897 | 1,70E-08 | 2,58E-06 | 9,992812052 |
| solute carrier family 39 (zinc transporter), member 4                          | 3,421386434 | 1,76E-08 | 2,65E-06 | 9,95756618  |
| histidine ammonia lyase                                                        | 0,351925742 | 1,83E-08 | 2,75E-06 | 9,914227976 |
| phospholipase A2, group XV                                                     | 0,359861446 | 1,86E-08 | 2,78E-06 | 9,897384591 |
| CD70 antigen                                                                   | 2,821837191 | 1,93E-08 | 2,86E-06 | 9,861104249 |
| pyridoxal (pyridoxine, vitamin B6) kinase                                      | 0,33415639  | 2,08E-08 | 3,06E-06 | 9,785297228 |
| ISG15 ubiquitin-like modifier                                                  | 3,832217275 | 2,11E-08 | 3,07E-06 | 9,772453296 |
| Rho GTPase activating protein 25                                               | 0,393436348 | 2,12E-08 | 3,07E-06 | 9,76809879  |
| glycoprotein (transmembrane) nmb                                               | 0,318690586 | 2,16E-08 | 3,11E-06 | 9,748058924 |
| guanylate binding protein 2                                                    | 3,46479355  | 2,19E-08 | 3,13E-06 | 9,734577318 |
| kallikrein 1-related peptidase b11                                             | 0,176806998 | 2,34E-08 | 3,31E-06 | 9,669835714 |
| superoxide dismutase 2, mitochondrial                                          | 2,948286821 | 2,37E-08 | 3,33E-06 | 9,656536371 |
| vesicle amine transport protein 1 homolog (T californica)                      | 0,379562594 | 2,40E-08 | 3,35E-06 | 9,644070388 |
| ryanodine receptor 1, skeletal muscle                                          | 0,315094692 | 2,42E-08 | 3,35E-06 | 9,636131515 |
| RIKEN cDNA 2010005H15 gene                                                     | 3,217955525 | 2,46E-08 | 3,39E-06 | 9,617402526 |
| glutathione S-transferase, mu 2                                                | 2,61224589  | 2,59E-08 | 3,54E-06 | 9,567240733 |
| lymphoid-restricted membrane protein                                           | 0,3563108   | 2,75E-08 | 3,75E-06 | 9,504340545 |
| zinc finger, DHHC domain containing 14                                         | 0,250807184 | 2,82E-08 | 3,82E-06 | 9,479382787 |
| kallikrein 1-related peptidase b11                                             | 0,378451811 | 2,96E-08 | 3,98E-06 | 9,431230765 |
| plasminogen activator, tissue                                                  | 4,376808302 | 3,08E-08 | 4,10E-06 | 9,392665138 |
| paired immunoglobulin-like type 2 receptor alpha                               | 4,037641914 | 3,27E-08 | 4,33E-06 | 9,330909064 |
| guanylate binding protein 3                                                    | 2,716946827 | 3,45E-08 | 4,52E-06 | 9,276043932 |
| sulfide quinone reductase-like (yeast)                                         | 3,241665539 | 3,46E-08 | 4,52E-06 | 9,275255036 |
| prostaglandin E synthase                                                       | 2,699580503 | 3,99E-08 | 5,19E-06 | 9,130032863 |
| phosphatidic acid phosphatase type 2A                                          | 4,331222471 | 4,21E-08 | 5,44E-06 | 9,075573179 |

|                                                                                 |             |          |          |             |
|---------------------------------------------------------------------------------|-------------|----------|----------|-------------|
| ATP-binding cassette, sub-family B (MDR/TAP), member 4                          | 5,598390245 | 4,29E-08 | 5,48E-06 | 9,056954338 |
| small EDRK-rich factor 1                                                        | 2,777832603 | 4,29E-08 | 5,48E-06 | 9,056290505 |
| hematopoietic cell specific Lyn substrate 1                                     | 2,565026923 | 4,48E-08 | 5,68E-06 | 9,012636899 |
| phospholipase C, beta 2                                                         | 0,340594713 | 4,65E-08 | 5,86E-06 | 8,974468436 |
| phosphotyrosine interaction domain containing 1                                 | 2,964889604 | 4,69E-08 | 5,87E-06 | 8,966550912 |
| secreted phosphoprotein 1                                                       | 0,312237375 | 4,79E-08 | 5,97E-06 | 8,944200962 |
| LIM domain only 4                                                               | 2,386601262 | 4,83E-08 | 5,97E-06 | 8,937463161 |
| Ena-vasodilator stimulated phosphoprotein                                       | 0,323913044 | 5,00E-08 | 6,06E-06 | 8,901691166 |
| monoglyceride lipase                                                            | 0,298059944 | 5,02E-08 | 6,06E-06 | 8,896915859 |
| troponin I, skeletal, fast 2                                                    | 0,372992856 | 5,04E-08 | 6,06E-06 | 8,893789983 |
| glutathione S-transferase, mu 2                                                 | 2,337655465 | 5,04E-08 | 6,06E-06 | 8,892926647 |
| acyl-CoA thioesterase 1                                                         | 0,279469466 | 5,04E-08 | 6,06E-06 | 8,892772052 |
| complement component 1, q subcomponent, alpha polypeptide                       | 0,321473979 | 5,34E-08 | 6,36E-06 | 8,835181335 |
| artemin                                                                         | 3,782320105 | 5,35E-08 | 6,36E-06 | 8,831912297 |
| integrin beta 7                                                                 | 0,311229093 | 5,65E-08 | 6,67E-06 | 8,777789365 |
| epithelial membrane protein 1                                                   | 0,320889859 | 5,77E-08 | 6,78E-06 | 8,75559649  |
| ADP-ribosylation factor-like 11                                                 | 0,404495015 | 5,91E-08 | 6,90E-06 | 8,731661498 |
| basic leucine zipper transcription factor, ATF-like                             | 2,770738719 | 6,00E-08 | 6,97E-06 | 8,716095691 |
| mannosidase 2, alpha B1                                                         | 0,395272499 | 6,04E-08 | 6,97E-06 | 8,710645503 |
| arylacetamide deacetylase-like 1                                                | 0,328887299 | 6,14E-08 | 7,05E-06 | 8,69271062  |
| ATP-binding cassette, sub-family C (CFTR/MRP), member 4                         | 2,485710126 | 6,91E-08 | 7,89E-06 | 8,573081124 |
| sterol O-acyltransferase 1                                                      | 0,406313967 | 6,96E-08 | 7,90E-06 | 8,566082047 |
| toll-like receptor 2                                                            | 2,957922306 | 7,08E-08 | 7,99E-06 | 8,548677836 |
| pyrimidinergic receptor P2Y, G-protein coupled, 6                               | 0,377107566 | 7,31E-08 | 8,18E-06 | 8,516667256 |
| IQ motif containing GTPase activating protein 2                                 | 0,333250536 | 7,33E-08 | 8,18E-06 | 8,513453959 |
| calreticulin 3                                                                  | 2,270838778 | 7,58E-08 | 8,41E-06 | 8,479797958 |
| CD97 antigen                                                                    | 0,255616103 | 7,75E-08 | 8,56E-06 | 8,457275966 |
| chemokine (C-C motif) ligand 7                                                  | 0,378036066 | 7,84E-08 | 8,61E-06 | 8,445401489 |
| serine (or cysteine) peptidase inhibitor, clade B, member 6a                    | 0,413759725 | 8,53E-08 | 9,32E-06 | 8,359815083 |
| solute carrier family 6 (neurotransmitter transporter, GABA), member 13         | 2,951710562 | 9,38E-08 | 9,38E-06 | 8,263171445 |
| ras homolog gene family, member f                                               | 3,037965579 | 9,40E-08 | 1,02E-05 | 8,261113134 |
| TBC1 domain family, member 2                                                    | 0,345809933 | 9,61E-08 | 1,03E-05 | 8,238758893 |
| Von Willebrand factor homolog                                                   | 0,402115158 | 9,78E-08 | 1,05E-05 | 8,220764001 |
| solute carrier family 4 (anion exchanger), member 8                             | 0,392057138 | 9,99E-08 | 1,06E-05 | 8,199190053 |
| deafness, autosomal dominant 5 (human)                                          | 3,026014732 | 1,05E-07 | 1,12E-05 | 8,144225735 |
| RAS guanyl releasing protein 1                                                  | 2,289588283 | 1,10E-07 | 1,16E-05 | 8,097983639 |
| megakaryocyte-associated tyrosine kinase                                        | 0,333705979 | 1,14E-07 | 1,20E-05 | 8,063574122 |
| platelet factor 4                                                               | 2,542664064 | 1,21E-07 | 1,26E-05 | 8,006447442 |
| lamin A                                                                         | 0,396198882 | 1,27E-07 | 1,32E-05 | 7,953940116 |
| RIKEN cDNA 5730528L13 gene                                                      | 2,540212466 | 1,32E-07 | 1,36E-05 | 7,919079715 |
| CD40 antigen                                                                    | 2,292073122 | 1,33E-07 | 1,36E-05 | 7,909133226 |
| solute carrier family 7 (cationic amino acid transporter, y+ system), member 11 | 2,646790864 | 1,39E-07 | 1,42E-05 | 7,862101655 |
| cell division cycle associated 7 like                                           | 0,394745044 | 1,40E-07 | 1,43E-05 | 7,852744442 |
| cytohesin 4                                                                     | 0,436302401 | 1,47E-07 | 1,49E-05 | 7,803570117 |
| hexokinase 3                                                                    | 0,350081334 | 1,58E-07 | 1,59E-05 | 7,729904178 |
| cyclin-dependent kinase 20                                                      | 0,418994518 | 1,61E-07 | 1,61E-05 | 7,712760497 |
| endothelin receptor type B                                                      | 3,00109201  | 1,70E-07 | 1,70E-05 | 7,656048376 |
| cyclin-dependent kinase 20                                                      | 0,449955652 | 1,79E-07 | 1,78E-05 | 7,602696073 |
| CD86 antigen                                                                    | 2,290769364 | 1,98E-07 | 1,96E-05 | 7,502208701 |
| protein tyrosine phosphatase, non-receptor type 1                               | 3,209342414 | 2,03E-07 | 1,99E-05 | 7,477414104 |
| glutathione S-transferase, mu 2                                                 | 2,472083941 | 2,07E-07 | 2,02E-05 | 7,458401254 |
| NAD(P)H dehydrogenase, quinone 1                                                | 2,896923987 | 2,32E-07 | 2,25E-05 | 7,342021324 |
| glutathione S-transferase, mu 1                                                 | 2,239739187 | 2,34E-07 | 2,27E-05 | 7,332620482 |
| predicted gene 5483                                                             | 2,785454002 | 2,36E-07 | 2,27E-05 | 7,323299978 |
| artemin                                                                         | 3,198896709 | 2,36E-07 | 2,27E-05 | 7,320977185 |
| CD86 antigen                                                                    | 2,392952706 | 2,42E-07 | 2,31E-05 | 7,299066566 |
| solute carrier organic anion transporter family, member 3a1                     | 2,636755461 | 2,43E-07 | 2,31E-05 | 7,293282439 |
| growth arrest and DNA-damage-inducible 45 alpha                                 | 0,428429811 | 2,43E-07 | 2,31E-05 | 7,290856005 |
| ectonucleotide pyrophosphatase/phosphodiesterase 2                              | 2,681289618 | 2,52E-07 | 2,37E-05 | 7,2564558   |
| family with sequence similarity 102, member B                                   | 3,319802933 | 2,60E-07 | 2,44E-05 | 7,224119794 |
| paired immunoglobulin-like type 2 receptor alpha                                | 4,771195873 | 2,65E-07 | 2,48E-05 | 7,203739472 |
| aldo-keto reductase family 1, member B8                                         | 2,939497082 | 2,83E-07 | 2,63E-05 | 7,138784574 |
| solute carrier family 29 (nucleoside transporters), member 3                    | 0,426769186 | 2,98E-07 | 2,75E-05 | 7,08449139  |
| two pore segment channel 2                                                      | 0,397091529 | 2,99E-07 | 2,75E-05 | 7,082176315 |
| DNA segment, Chr 16, ERATO Doi 472, expressed                                   | 2,458869422 | 3,03E-07 | 2,78E-05 | 7,066566727 |
| membrane-spanning 4-domains, subfamily A, member 7                              | 2,195561158 | 3,32E-07 | 3,03E-05 | 6,975341322 |
| microfibrillar-associated protein 3-like                                        | 3,348990364 | 3,37E-07 | 3,07E-05 | 6,957455913 |
| matrix metalloproteinase 2                                                      | 4,231997504 | 3,39E-07 | 3,07E-05 | 6,951875218 |
| monoglyceride lipase                                                            | 0,317854596 | 3,48E-07 | 3,13E-05 | 6,925163186 |
| CD40 antigen                                                                    | 2,289080766 | 3,50E-07 | 3,13E-05 | 6,921112656 |
| kallikrein 1-related peptidase b27                                              | 0,349119775 | 3,51E-07 | 3,13E-05 | 6,917782466 |
| killer cell lectin-like receptor, subfamily A, member 3                         | 0,475826203 | 3,63E-07 | 3,23E-05 | 6,883618305 |
| RAB11 family interacting protein 5 (class I)                                    | 0,4232841   | 3,72E-07 | 3,29E-05 | 6,85836     |
| glutaredoxin                                                                    | 2,110331482 | 3,81E-07 | 3,36E-05 | 6,833245568 |
| glutathione peroxidase 3                                                        | 0,351359384 | 3,91E-07 | 3,43E-05 | 6,807820644 |
| RIKEN cDNA 5730469M10 gene                                                      | 0,461375278 | 4,05E-07 | 3,54E-05 | 6,771552029 |
| mannosidase 2, alpha B1                                                         | 0,465353935 | 4,11E-07 | 3,58E-05 | 6,755594196 |
| pleckstrin homology-like domain, family A, member 1                             | 3,489669362 | 4,17E-07 | 3,62E-05 | 6,74009304  |
| legumain                                                                        | 0,452514301 | 4,30E-07 | 3,71E-05 | 6,708873922 |
| low density lipoprotein-related protein 12                                      | 0,478378698 | 4,35E-07 | 3,74E-05 | 6,698746475 |
| transforming growth factor, beta receptor II                                    | 0,445273517 | 4,46E-07 | 3,81E-05 | 6,671587588 |

|                                                                                                           |             |          |             |             |
|-----------------------------------------------------------------------------------------------------------|-------------|----------|-------------|-------------|
| fibrinogen-like protein 2                                                                                 | 3,393487464 | 4,47E-07 | 3,81E-05    | 6,670271234 |
| adrenergic receptor, alpha 2a                                                                             | 2,678989543 | 4,54E-07 | 3,85E-05    | 6,653763684 |
| CD97 antigen                                                                                              | 0,255717431 | 4,65E-07 | 3,93E-05    | 6,630266543 |
| annexin A1                                                                                                | 0,353684924 | 4,71E-07 | 3,96E-05    | 6,616751172 |
| protein tyrosine phosphatase-like A domain containing 1                                                   | 2,101997477 | 4,86E-07 | 4,07E-05    | 6,584709898 |
| interferon induced transmembrane protein 1                                                                | 2,107276072 | 4,91E-07 | 4,10E-05    | 6,574453043 |
| neuropeptide Y                                                                                            | 0,421778498 | 5,47E-07 | 4,53E-05    | 6,462808312 |
| triggering receptor expressed on myeloid cells 2                                                          | 0,298130433 | 5,47E-07 | 4,53E-05    | 6,462196314 |
| protein kinase, cAMP dependent regulatory, type II beta                                                   | 2,409021235 | 5,50E-07 | 4,53E-05    | 6,458139884 |
| predicted gene 7120                                                                                       | 0,434355702 | 5,52E-07 | 4,54E-05    | 6,454005622 |
| MICAL-like 2                                                                                              | 2,553907729 | 5,74E-07 | 4,70E-05    | 6,413033698 |
| Rho GTPase activating protein 24                                                                          | 0,451863469 | 6,05E-07 | 4,93E-05    | 6,35961335  |
| Fc receptor, IgG, low affinity III                                                                        | 0,337147735 | 6,10E-07 | 4,93E-05    | 6,351532429 |
| guanylate binding protein 3                                                                               | 2,731051855 | 6,13E-07 | 4,93E-05    | 6,346532276 |
| epidermal growth factor receptor pathway substrate 8                                                      | 0,493940536 | 6,13E-07 | 4,93E-05    | 6,346078036 |
| expressed sequence C77080                                                                                 | 0,400478141 | 6,15E-07 | 4,93E-05    | 6,343493939 |
| keratin 17                                                                                                | 3,217626602 | 6,19E-07 | 4,95E-05    | 6,335837975 |
| thymidylate synthase, pseudogene                                                                          | 2,61966928  | 6,23E-07 | 4,96E-05    | 6,329406964 |
| coagulation factor V                                                                                      | 2,163050358 | 6,26E-07 | 4,96E-05    | 6,32528218  |
| creatine kinase, brain                                                                                    | 0,406554126 | 6,40E-07 | 5,06E-05    | 6,302575243 |
| CD40 antigen                                                                                              | 2,100873966 | 6,60E-07 | 5,20E-05    | 6,270014046 |
| receptor (TNFRSF)-interacting serine-threonine kinase 2                                                   | 2,16354368  | 6,71E-07 | 5,27E-05    | 6,253034911 |
| EF-hand calcium binding domain 4A                                                                         | 0,415668804 | 6,74E-07 | 5,27E-05    | 6,249062106 |
| CD93 antigen                                                                                              | 0,312835701 | 6,89E-07 | 5,36E-05    | 6,226805052 |
| filamin binding LIM protein 1                                                                             | 0,401187024 | 6,95E-07 | 5,39E-05    | 6,217556313 |
| expressed sequence AI607873                                                                               | 0,427461603 | 7,08E-07 | 5,46E-05    | 6,198167096 |
| B and T lymphocyte associated                                                                             | 3,137698392 | 7,09E-07 | 5,46E-05    | 6,196577554 |
| AXL receptor tyrosine kinase                                                                              | 0,469568626 | 7,20E-07 | 5,52E-05    | 6,180852433 |
| RIKEN cDNA A130040M12 gene                                                                                | 2,952804038 | 7,27E-07 | 5,55E-05    | 6,171184638 |
| myosin, light polypeptide 9, regulatory                                                                   | 0,456757202 | 7,38E-07 | 5,61E-05    | 6,15650196  |
| tetraspanin 14                                                                                            | 0,450007079 | 7,54E-07 | 5,72E-05    | 6,13376222  |
| ubiquitin carboxy-terminal hydrolase L1                                                                   | 2,326893285 | 7,60E-07 | 5,74E-05    | 6,126082759 |
| CD200 antigen                                                                                             | 2,186934131 | 7,74E-07 | 5,82E-05    | 6,107623209 |
| FXYD domain-containing ion transport regulator 5                                                          | 0,477958376 | 7,93E-07 | 5,94E-05    | 6,082769881 |
| phospholipid transfer protein                                                                             | 0,42596035  | 8,15E-07 | 6,09E-05    | 6,054625497 |
| elastin microfibril interfacier 2                                                                         | 0,456017237 | 8,30E-07 | 6,18E-05    | 6,036050686 |
| RAS p21 protein activator 3                                                                               | 0,47450563  | 8,66E-07 | 6,42E-05    | 5,992643646 |
| FK506 binding protein 11                                                                                  | 0,463115669 | 8,68E-07 | 6,42E-05    | 5,989322094 |
| interleukin 11 receptor, alpha chain 1                                                                    | 0,463281147 | 8,77E-07 | 6,45E-05    | 5,979705008 |
| protein tyrosine phosphatase, receptor type, f polypeptide (PTPRF), interacting protein (liprin), alpha 1 | 3,750769216 | 1,01E-06 | 7,38E-05    | 5,837228057 |
| actin, gamma 2, smooth muscle, enteric                                                                    | 0,393274034 | 1,01E-06 | 7,38E-05    | 5,835564351 |
| glycoprotein 6 (platelet)                                                                                 | 2,986779491 | 1,04E-06 | 7,55E-05    | 5,808505208 |
| diacylglycerol O-acyltransferase 2                                                                        | 2,313533788 | 1,07E-06 | 7,77E-05    | 5,775059333 |
| phospholipase D family, member 3                                                                          | 0,466205808 | 1,10E-06 | 7,97E-05    | 5,744045302 |
| megakaryocyte-associated tyrosine kinase                                                                  | 0,333746094 | 1,11E-06 | 7,97E-05    | 5,74097435  |
| ankyrin repeat and SOCS box-containing 2                                                                  | 0,422316303 | 1,15E-06 | 8,26E-05    | 5,700782126 |
| solute carrier family 40 (iron-regulated transporter), member 1                                           | 0,494217384 | 1,20E-06 | 8,60E-05    | 5,656508936 |
| G protein-coupled receptor 155                                                                            | 2,809227796 | 1,28E-06 | 9,16E-05    | 5,588327141 |
| triggering receptor expressed on myeloid cells-like 4                                                     | 2,431451571 | 1,31E-06 | 9,28E-05    | 5,57085655  |
| heme oxygenase (decycling) 1                                                                              | 2,365814388 | 1,31E-06 | 9,29E-05    | 5,566275948 |
| potassium channel tetramerisation domain containing 14                                                    | 2,120028536 | 1,32E-06 | 9,30E-05    | 5,561548415 |
| triggering receptor expressed on myeloid cells-like 4                                                     | 2,627816489 | 1,33E-06 | 9,35E-05    | 5,553009169 |
| CD69 antigen                                                                                              | 2,311423927 | 1,35E-06 | 9,45E-05    | 5,534654013 |
| RAB10, member RAS oncogene family                                                                         | 2,466785166 | 1,38E-06 | 9,57E-05    | 5,514404272 |
| lamin A                                                                                                   | 0,454528075 | 1,40E-06 | 9,67E-05    | 5,500307557 |
| cytochrome P450, family 27, subfamily a, polypeptide 1                                                    | 0,479070986 | 1,40E-06 | 9,68E-05    | 5,496643836 |
| Ras association (RalGDS/AF-6) domain family member 4                                                      | 2,540881183 | 1,44E-06 | 9,83E-05    | 5,473325425 |
| solute carrier family 7 (cationic amino acid transporter, y+ system), member 11                           | 2,438232307 | 1,48E-06 | 0,000100757 | 5,444764371 |
| Ras association (RalGDS/AF-6) domain family member 4                                                      | 2,338727834 | 1,50E-06 | 0,000101675 | 5,428825758 |
| solute carrier family 31, member 2                                                                        | 2,221313667 | 1,50E-06 | 0,000101675 | 5,42864754  |
| cyclin D2                                                                                                 | 3,625199817 | 1,51E-06 | 0,000101821 | 5,423789129 |
| putative transposase element L1Md-A101/L1Md-A102/L1Md-A2-like                                             | 0,40891018  | 1,53E-06 | 0,000103221 | 5,406393037 |
| solute carrier family 32 (GABA vesicular transporter), member 1                                           | 2,726177969 | 1,58E-06 | 0,000106392 | 5,371945917 |
| potassium channel tetramerisation domain containing 12                                                    | 0,495716196 | 1,63E-06 | 0,000109339 | 5,340533562 |
| matrix metalloproteinase 9                                                                                | 2,328395527 | 1,69E-06 | 0,000112191 | 5,307410231 |
| RAB11 family interacting protein 5 (class I)                                                              | 0,471125351 | 1,73E-06 | 0,000114486 | 5,28328061  |
| testis expressed gene 14                                                                                  | 2,084478393 | 1,75E-06 | 0,000115832 | 5,267964949 |
| tumor necrosis factor receptor superfamily, member 12a                                                    | 0,497978856 | 1,81E-06 | 0,000119201 | 5,235215509 |
| major facilitator superfamily domain containing 7A                                                        | 2,4047834   | 1,85E-06 | 0,000120936 | 5,215327106 |
| solute carrier family 9 (sodium/hydrogen exchanger), member 3 regulator 2                                 | 0,432412451 | 1,85E-06 | 0,000120936 | 5,213799883 |
| sphingomyelin phosphodiesterase, acid-like 3A                                                             | 0,448706429 | 1,92E-06 | 0,000124885 | 5,174777429 |
| RIKEN cDNA 5430435G22 gene                                                                                | 0,425922386 | 1,92E-06 | 0,000124885 | 5,174258918 |
| hypothetical LOC100503337                                                                                 | 2,053728729 | 1,93E-06 | 0,000125331 | 5,167523268 |
| RIKEN cDNA D330045A20 gene                                                                                | 2,165513429 | 1,96E-06 | 0,000125793 | 5,154466869 |
| cathepsin L                                                                                               | 0,446535116 | 1,96E-06 | 0,000125793 | 5,153470829 |
| toll-like receptor 1                                                                                      | 2,312315962 | 1,96E-06 | 0,000125793 | 5,152412567 |
| toll-like receptor 4                                                                                      | 0,45848201  | 1,97E-06 | 0,000125793 | 5,150683623 |
| syndecan 3                                                                                                | 0,468336162 | 2,01E-06 | 0,000128347 | 5,126831469 |
| low density lipoprotein-related protein 12                                                                | 0,469653742 | 2,06E-06 | 0,000130343 | 5,104878318 |
| biglycan                                                                                                  | 0,430165617 | 2,06E-06 | 0,000130343 | 5,104608421 |
| killer cell lectin-like receptor, subfamily A, member 17                                                  | 0,421342462 | 2,14E-06 | 0,000134202 | 5,065149614 |

|                                                                                                         |             |          |             |             |
|---------------------------------------------------------------------------------------------------------|-------------|----------|-------------|-------------|
| CD97 antigen                                                                                            | 0,306825691 | 2,15E-06 | 0,00013436  | 5,060801241 |
| solute carrier family 37 (glycerol-3-phosphate transporter), member 2                                   | 0,47980744  | 2,16E-06 | 0,000134843 | 5,053979483 |
| serine (or cysteine) peptidase inhibitor, clade B (ovalbumin), member 12                                | 2,110924437 | 2,18E-06 | 0,000135491 | 5,042949209 |
| C2 calcium-dependent domain containing 4B                                                               | 2,252658067 | 2,18E-06 | 0,000135491 | 5,042828144 |
| lamin A                                                                                                 | 0,479744829 | 2,22E-06 | 0,000137575 | 5,024037568 |
| guanylate binding protein 5                                                                             | 3,294651452 | 2,33E-06 | 0,000143568 | 4,976697935 |
| tumor necrosis factor, alpha-induced protein 8-like 2                                                   | 0,490105244 | 2,33E-06 | 0,000143568 | 4,974034454 |
| RAD54 like ( <i>S. cerevisiae</i> )                                                                     | 0,436151032 | 2,36E-06 | 0,000144701 | 4,96168982  |
| RIKEN cDNA 1100001G20 gene                                                                              | 2,505530981 | 2,39E-06 | 0,000145921 | 4,94812956  |
| UDP-N-acetyl-alpha-D-galactosamine:polypeptide N-acetylgalactosaminyltransferase 9                      | 0,449364986 | 2,57E-06 | 0,000156043 | 4,876134674 |
| acid phosphatase, prostate                                                                              | 2,207913554 | 2,60E-06 | 0,000157655 | 4,862529298 |
| matrix metalloproteinase 14 (membrane-inserted)                                                         | 2,240519914 | 2,65E-06 | 0,000160049 | 4,844009167 |
| low density lipoprotein receptor-related protein 8, apolipoprotein e receptor                           | 2,211922827 | 2,74E-06 | 0,000164191 | 4,80798186  |
| synuclein, alpha                                                                                        | 3,192500254 | 2,75E-06 | 0,000164191 | 4,805713386 |
| solute carrier family 45, member 4                                                                      | 0,396761937 | 2,81E-06 | 0,000167486 | 4,782297696 |
| uridine phosphorylase 1                                                                                 | 2,183344948 | 2,82E-06 | 0,000167667 | 4,778206622 |
| complement component 3                                                                                  | 2,125127161 | 2,87E-06 | 0,00016972  | 4,762730249 |
| leupaxin                                                                                                | 0,458973315 | 2,90E-06 | 0,000170856 | 4,749959622 |
| SAM and SH3 domain containing 3                                                                         | 0,484569303 | 2,94E-06 | 0,0001725   | 4,737169355 |
| E2F transcription factor 2                                                                              | 0,458842239 | 3,06E-06 | 0,000178953 | 4,696465176 |
| GM2 ganglioside activator protein                                                                       | 0,436747286 | 3,21E-06 | 0,00018686  | 4,646156883 |
| inhibin beta-A                                                                                          | 2,234099847 | 3,34E-06 | 0,000196394 | 4,60497765  |
| RAS protein activator like 3                                                                            | 0,48620405  | 3,41E-06 | 0,000196215 | 4,584575167 |
| suppression of tumorigenicity 7                                                                         | 2,239109399 | 3,41E-06 | 0,000196215 | 4,58364141  |
| fibronectin 1                                                                                           | 0,494988454 | 3,42E-06 | 0,000196215 | 4,581448578 |
| RIKEN cDNA D330045A20 gene                                                                              | 2,467953511 | 3,43E-06 | 0,000196439 | 4,577407231 |
| thioredoxin interacting protein                                                                         | 0,438906642 | 3,55E-06 | 0,000202392 | 4,543836847 |
| heat-responsive protein 12                                                                              | 2,276155866 | 3,57E-06 | 0,000203251 | 4,536629459 |
| integrin beta 5                                                                                         | 0,482652899 | 3,61E-06 | 0,000205064 | 4,524649226 |
| archaelysin family metalloproteinase 1                                                                  | 0,439888595 | 3,65E-06 | 0,000206662 | 4,513823842 |
| HtrA serine peptidase 1                                                                                 | 2,162980115 | 3,81E-06 | 0,000214312 | 4,469567499 |
| killer cell lectin-like receptor subfamily B member 1B                                                  | 2,065239944 | 3,82E-06 | 0,000214312 | 4,467968467 |
| RIKEN cDNA 9030425E11 gene                                                                              | 2,87442676  | 3,83E-06 | 0,000214591 | 4,463823626 |
| interleukin 10                                                                                          | 3,266769    | 3,90E-06 | 0,000216444 | 4,446603328 |
| membrane bound O-acyltransferase domain containing 1                                                    | 0,388492694 | 4,14E-06 | 0,0002285   | 4,385294086 |
| glutathione S-transferase, mu 1                                                                         | 2,210986846 | 4,24E-06 | 0,000233385 | 4,360769746 |
| filamin, beta                                                                                           | 2,365414411 | 4,28E-06 | 0,000234503 | 4,350106506 |
| CD1d1 antigen                                                                                           | 2,183144698 | 4,29E-06 | 0,000234503 | 4,34860452  |
| mucolipin 2                                                                                             | 2,24179648  | 4,29E-06 | 0,000234503 | 4,34761241  |
| SLAM family member 8                                                                                    | 0,443836795 | 4,33E-06 | 0,00023584  | 4,339030572 |
| heat-responsive protein 12                                                                              | 2,019280738 | 4,57E-06 | 0,000248344 | 4,282266478 |
| RIKEN cDNA 1190002H23 gene                                                                              | 2,169837874 | 4,58E-06 | 0,000248344 | 4,280435344 |
| dipeptidase 2                                                                                           | 0,44303095  | 4,79E-06 | 0,00025817  | 4,235091097 |
| lectin, galactose binding, soluble 1                                                                    | 0,499817074 | 4,82E-06 | 0,000259156 | 4,228473505 |
| family with sequence similarity 181, member B                                                           | 2,08996213  | 4,91E-06 | 0,000263476 | 4,208771302 |
| orosomucoid 2                                                                                           | 2,228613883 | 5,02E-06 | 0,000268098 | 4,185521021 |
| poliovirus receptor                                                                                     | 2,324524307 | 5,44E-06 | 0,000289399 | 4,104178763 |
| RIKEN cDNA 5031439G07 gene                                                                              | 0,463144555 | 5,70E-06 | 0,000302743 | 4,055127057 |
| glycoprotein (transmembrane) nmb                                                                        | 0,379627798 | 5,76E-06 | 0,000305113 | 4,04446472  |
| serine (or cysteine) peptidase inhibitor, clade B (ovalbumin), member 12                                | 2,502688069 | 5,85E-06 | 0,000308695 | 4,029163973 |
| interferon induced transmembrane protein 1                                                              | 2,893886537 | 5,86E-06 | 0,000308695 | 4,027144925 |
| galanin                                                                                                 | 2,394803226 | 5,90E-06 | 0,000310056 | 4,019981719 |
| perilipin 2                                                                                             | 0,38913624  | 6,01E-06 | 0,000314725 | 4,001971399 |
| MAM domain containing 2                                                                                 | 0,445946652 | 6,15E-06 | 0,000321414 | 3,977704468 |
| thromboxane A synthase 1, platelet                                                                      | 0,476176695 | 6,34E-06 | 0,000330343 | 3,946889264 |
| glycoprotein (transmembrane) nmb                                                                        | 0,442265016 | 6,47E-06 | 0,000336033 | 3,925435935 |
| growth arrest and DNA-damage-inducible 45 alpha                                                         | 0,413227852 | 6,48E-06 | 0,000336033 | 3,924101172 |
| Fc receptor-like 5, scavenger receptor                                                                  | 0,499130871 | 6,50E-06 | 0,000336404 | 3,920369902 |
| LIM domain only 2                                                                                       | 0,44983858  | 6,63E-06 | 0,000342063 | 3,900611608 |
| CD84 antigen                                                                                            | 0,439009988 | 6,86E-06 | 0,00035148  | 3,865238521 |
| protein tyrosine phosphatase, receptor type, f polypeptide (PTPRF), interacting protein (liprin), alpha | 2,150905154 | 7,02E-06 | 0,000358615 | 3,841684752 |
| leukemia inhibitory factor                                                                              | 2,273689862 | 7,76E-06 | 0,000386978 | 3,738050717 |
| heme binding protein 1                                                                                  | 0,45293244  | 7,80E-06 | 0,000387127 | 3,732669271 |
| ADAMTS-like 5                                                                                           | 0,454667588 | 7,94E-06 | 0,000392613 | 3,71485419  |
| peroxiredoxin 5                                                                                         | 2,138797857 | 7,98E-06 | 0,000392613 | 3,709262902 |
| thrombospondin 1                                                                                        | 2,270482106 | 8,27E-06 | 0,00040558  | 3,672384436 |
| 2'-5' oligoadenylate synthetase-like 1                                                                  | 2,552219824 | 8,32E-06 | 0,000407089 | 3,666108001 |
| cytochrome P450, family 4, subfamily f, polypeptide 38                                                  | 0,369916167 | 8,35E-06 | 0,000407239 | 3,663280457 |
| cyclin D1                                                                                               | 0,408377313 | 8,72E-06 | 0,000422184 | 3,618489637 |
| malic enzyme 1, NADP(+)-dependent, cytosolic                                                            | 2,167761139 | 8,83E-06 | 0,000425591 | 3,605412726 |
| peroxiredoxin 1                                                                                         | 2,557104969 | 8,85E-06 | 0,000425591 | 3,603344166 |
| t-complex protein 1                                                                                     | 2,474576159 | 9,24E-06 | 0,00044359  | 3,558299996 |
| pleckstrin                                                                                              | 2,330003184 | 9,30E-06 | 0,00044541  | 3,551681351 |
| potassium channel tetramerisation domain containing 14                                                  | 3,037473854 | 9,34E-06 | 0,000446133 | 3,547615769 |
| syndecan binding protein (syntenin) 2                                                                   | 2,230045667 | 9,44E-06 | 0,000449783 | 3,536838728 |
| nebulin-related anchoring protein                                                                       | 0,462694898 | 9,76E-06 | 0,000457923 | 3,502194045 |
| MICAL-like 2                                                                                            | 2,08250068  | 9,79E-06 | 0,000457923 | 3,49944615  |
| plexin B2                                                                                               | 0,469767445 | 1,05E-05 | 0,000486169 | 3,428496987 |
| connective tissue growth factor                                                                         | 0,471949008 | 1,07E-05 | 0,000495726 | 3,403821773 |
| CD300 molecule-like family member d                                                                     | 0,447975127 | 1,09E-05 | 0,000499934 | 3,392810045 |
| cytochrome P450, family 4, subfamily f, polypeptide 18                                                  | 0,402347214 | 1,12E-05 | 0,000511982 | 3,357881233 |

|                                                                                   |             |             |             |             |
|-----------------------------------------------------------------------------------|-------------|-------------|-------------|-------------|
| insulin-like growth factor 2 receptor                                             | 0,463522598 | 1,13E-05    | 0,000511982 | 3,354543613 |
| mcf.2 transforming sequence-like monoglyceride lipase                             | 0,497669449 | 1,14E-05    | 0,000517106 | 3,342017111 |
| chemokine (C-C motif) ligand 7                                                    | 0,393293822 | 1,15E-05    | 0,000518174 | 3,3358294   |
| thioredoxin interacting protein                                                   | 0,463930856 | 1,15E-05    | 0,000518174 | 3,333100513 |
| bone marrow stromal cell antigen 1                                                | 0,449642424 | 1,15E-05    | 0,000519139 | 3,328929764 |
| RIKEN cDNA 9130230L23 gene                                                        | 2,592235755 | 1,17E-05    | 0,000523591 | 3,315645608 |
| solute carrier family 15, member 3                                                | 2,031223706 | 1,19E-05    | 0,000529836 | 3,295388419 |
| G protein-coupled receptor 137B                                                   | 2,121038084 | 1,19E-05    | 0,000529836 | 3,294030443 |
| G protein-coupled receptor 120                                                    | 0,478961641 | 1,20E-05    | 0,000529836 | 3,292288466 |
| leukotriene B4 receptor 1                                                         | 0,481541784 | 1,22E-05    | 0,000539268 | 3,269697395 |
| ATPase, H+ transporting, lysosomal V0 subunit A1                                  | 2,27145437  | 1,24E-05    | 0,000542745 | 3,258673943 |
| RIKEN cDNA 5730469M10 gene                                                        | 0,485387875 | 1,25E-05    | 0,000545172 | 3,250174276 |
| family with sequence similarity 102, member B                                     | 0,479415928 | 1,27E-05    | 0,000551918 | 3,234845777 |
| heat-responsive protein 12                                                        | 2,42420049  | 1,36E-05    | 0,000591603 | 3,156837577 |
| Wolfram syndrome 1 homolog (human)                                                | 2,141322537 | 1,40E-05    | 0,000603583 | 3,134032041 |
| ladinin                                                                           | 0,498518019 | 1,41E-05    | 0,000610694 | 3,119812424 |
| cytochrome P450, family 27, subfamily a, polypeptide 1                            | 2,068521055 | 1,44E-05    | 0,000620489 | 3,101273474 |
| adenylate kinase 8                                                                | 0,485023993 | 1,46E-05    | 0,000627559 | 3,087457049 |
| elastin microfibril interfacier 2                                                 | 0,48319487  | 1,49E-05    | 0,000634891 | 3,069060567 |
| cyclin-dependent kinase inhibitor 2C (p18, inhibits CDK4)                         | 0,47516322  | 1,50E-05    | 0,000638907 | 3,05829907  |
| chemokine (C-C motif) ligand 4                                                    | 0,486790047 | 1,52E-05    | 0,000643171 | 3,047200098 |
| zinc finger, RAN-binding domain containing 3                                      | 2,007054917 | 1,59E-05    | 0,000667202 | 3,007181841 |
| myosin, light polypeptide kinase                                                  | 0,453665537 | 1,86E-05    | 0,000756377 | 2,841097074 |
| FBJ osteosarcoma oncogene                                                         | 2,05682497  | 2,35E-05    | 0,000931707 | 2,598460924 |
| phospholipase D family, member 3                                                  | 0,488641889 | 2,36E-05    | 0,000933092 | 2,594531316 |
| Sp140 nuclear body protein                                                        | 0,461071875 | 2,49E-05    | 0,000978591 | 2,539613004 |
| collagen, type VI, alpha 3                                                        | 2,031909666 | 2,52E-05    | 0,00098664  | 2,525507542 |
| acetyl-Coenzyme A acyltransferase 2 (mitochondrial 3-oxoacyl-Coenzyme A thiolase) | 0,444582937 | 2,52E-05    | 0,00098664  | 2,525287699 |
| cytochrome P450, family 27, subfamily a, polypeptide 1                            | 0,459937077 | 2,56E-05    | 0,000998927 | 2,510596259 |
| solute carrier family 25, member 37                                               | 0,420779616 | 2,57E-05    | 0,00100064  | 2,506878846 |
| lipoma HMGIC fusion partner-like 2                                                | 2,23404511  | 2,60E-05    | 0,00101009  | 2,491887726 |
| poliovirus receptor                                                               | 0,496855026 | 2,61E-05    | 0,00101009  | 2,489988476 |
| dipeptidase 2                                                                     | 2,155431557 | 2,68E-05    | 0,001030502 | 2,461686565 |
| calreticulin 3                                                                    | 0,456618067 | 2,70E-05    | 0,001033541 | 2,455958494 |
| proteasome (prosome, macropain) 26S subunit, non-ATPase, 11                       | 2,11673416  | 2,70E-05    | 0,001033541 | 2,45425493  |
| protein kinase domain containing, cytoplasmic                                     | 2,057529155 | 3,01E-05    | 0,001131748 | 2,34377287  |
| CD180 antigen                                                                     | 0,499987224 | 3,14E-05    | 0,001172249 | 2,300095716 |
| protein C receptor, endothelial                                                   | 0,473580739 | 3,24E-05    | 0,001202169 | 2,26857526  |
| two pore channel 1                                                                | 2,412244287 | 3,32E-05    | 0,001222414 | 2,243396152 |
| POU domain, class 2, transcription factor 2                                       | 0,467617242 | 3,35E-05    | 0,001229759 | 2,232298287 |
| DTW domain containing 1                                                           | 2,07918981  | 3,47E-05    | 0,001263193 | 2,19738889  |
| progressive ankylosis                                                             | 2,071175331 | 3,56E-05    | 0,00128911  | 2,171044742 |
| lymphocyte cytosolic protein 2                                                    | 0,494986059 | 3,62E-05    | 0,00130644  | 2,153690048 |
| latent transforming growth factor beta binding protein 3                          | 2,116795018 | 3,63E-05    | 0,001309911 | 2,149155941 |
| purine-nucleoside phosphorylase 2                                                 | 0,489660272 | 3,68E-05    | 0,001325034 | 2,135548239 |
| glutathione S-transferase, mu 6                                                   | 2,393273665 | 3,80E-05    | 0,001356533 | 2,10242192  |
| glutathione synthetase                                                            | 2,177325173 | 3,84E-05    | 0,001362685 | 2,092426413 |
| dystonin                                                                          | 2,183956344 | 3,86E-05    | 0,001367687 | 2,086884    |
| eosinophil-associated, ribonuclease A family, member 2                            | 2,189644653 | 3,94E-05    | 0,001387781 | 2,06658108  |
| ras homolog gene family, member D                                                 | 0,452832289 | 4,08E-05    | 0,001429897 | 2,030562825 |
| isopentenyl-diphosphate delta isomerase                                           | 2,095387379 | 4,25E-05    | 0,001477342 | 1,988264713 |
| family with sequence similarity 117, memberA                                      | 2,328118925 | 4,29E-05    | 0,001478628 | 1,979797098 |
| myosin VIIA                                                                       | 0,473223213 | 4,34E-05    | 0,001490848 | 1,966802102 |
| alanine-glyoxylate aminotransferase 2-like 2                                      | 0,470616882 | 4,46E-05    | 0,001519503 | 1,938669195 |
| chemokine (C-C motif) ligand 4                                                    | 2,138936665 | 4,91E-05    | 0,001645871 | 1,839640884 |
| Fanconi anemia, complementation group D2                                          | 2,024683082 | 5,69E-05    | 0,00185061  | 1,68777518  |
| connective tissue growth factor                                                   | 0,491514518 | 5,86E-05    | 0,001891284 | 1,657339237 |
| C-type lectin domain family 7, member a                                           | 0,491278882 | 5,97E-05    | 0,001920685 | 1,638268322 |
| membrane-spanning 4-domains, subfamily A, member 7                                | 0,437471916 | 6,55E-05    | 0,002079502 | 1,543868577 |
| ras homolog gene family, member J                                                 | 2,502606629 | 6,77E-05    | 0,002131432 | 1,509050888 |
| proline-serine-threonine phosphatase-interacting protein 2                        | 0,471555475 | 7,82E-05    | 0,002437071 | 1,362043647 |
| poliovirus receptor                                                               | 2,303054104 | 7,84E-05    | 0,0024406   | 1,359001131 |
| SKI-like                                                                          | 2,107168745 | 8,07E-05    | 0,002502784 | 1,328854054 |
| nicotinamide phosphoribosyltransferase                                            | 2,239000853 | 8,42E-05    | 0,002582907 | 1,285380888 |
| eosinophil-associated, ribonuclease A family, member 2                            | 2,29221156  | 8,59E-05    | 0,002618304 | 1,265298598 |
| RIKEN cDNA 6330409N04 gene                                                        | 0,455420718 | 9,16E-05    | 0,002750383 | 1,199669727 |
| calcium/calmodulin-dependent protein kinase I                                     | 2,050401108 | 0,000106954 | 0,003138936 | 1,040358464 |
| RIKEN cDNA 2400003C14 gene                                                        | 0,495594363 | 0,000141873 | 0,003875841 | 0,75067286  |
| cyclin D1                                                                         | 2,267948756 | 0,000153593 | 0,004119336 | 0,669341972 |
| low density lipoprotein receptor adaptor protein 1                                | 0,495627255 | 0,000155036 | 0,004147218 | 0,659759748 |
| c-mer proto-oncogene tyrosine kinase                                              | 0,490999903 | 0,000162019 | 0,004278288 | 0,614634805 |
| heparanase                                                                        | 0,471337705 | 0,000171391 | 0,004474017 | 0,557041186 |
| potassium channel tetramerisation domain containing 14                            | 0,490040295 | 0,000221358 | 0,005420245 | 0,295198945 |
| family with sequence similarity 83, member F                                      | 2,353577137 | 0,000244745 | 0,005826227 | 0,192491514 |
| fibronectin leucine rich transmembrane protein 2                                  | 0,466487758 | 0,000264819 | 0,006219324 | 0,111911561 |
| serglycin                                                                         | 0,483226123 | 0,000381822 | 0,008213779 | -0,26169032 |
| phosphatidic acid phosphatase type 2A                                             | 2,156239146 | 0,000386873 | 0,008305028 | -0,27509243 |
| leucine rich repeat containing 59                                                 | 2,452023691 | 0,000530208 | 0,01062693  | -0,59622602 |
| vacuolar protein sorting 26 homolog B (yeast)                                     | 2,056727291 | 0,000751448 | 0,013907883 | -0,95075327 |
| versican                                                                          | 2,045477668 | 0,001043545 | 0,017615928 | -1,28371232 |
|                                                                                   | 2,004574782 | 0,001086934 | 0,018213688 | -1,32495379 |

**Panel 2: C1783Genes differentially regulated (fold-change > 2; FDR (false discovery rate) < 0.05) in murine DCs infected with *Aggregatibacter actinomycetemcomitans* versus untreated controls.**

| Name                                                                                         | FC          | P.Value  | adj.P.Val | B            |
|----------------------------------------------------------------------------------------------|-------------|----------|-----------|--------------|
| chemokine (C-X-C motif) ligand 1                                                             | 54,99041988 | 1,92E-16 | 3,94E-12  | 27,16464982  |
| ectonucleotide pyrophosphatase/phosphodiesterase 2                                           | 80,87383854 | 5,90E-16 | 5,74E-12  | 26,28115643  |
| chemokine (C-X-C motif) ligand 2                                                             | 63,82209088 | 8,38E-16 | 5,74E-12  | 25,99730148  |
| serum amyloid A 3                                                                            | 16,17195373 | 1,21E-14 | 4,37E-11  | 23,73097484  |
| interleukin 1 beta                                                                           | 18,1587914  | 1,48E-14 | 4,37E-11  | 23,55244281  |
| inhibin beta-A                                                                               | 32,32379524 | 1,81E-14 | 4,37E-11  | 23,37087001  |
| ISG15 ubiquitin-like modifier                                                                | 43,84935291 | 1,87E-14 | 4,37E-11  | 23,34186195  |
| interleukin 1 alpha                                                                          | 32,4471597  | 1,94E-14 | 4,37E-11  | 23,30970028  |
| chemokine (C-X-C motif) ligand 2                                                             | 54,4747682  | 2,07E-14 | 4,37E-11  | 23,25136958  |
| cholesterol 25-hydroxylase                                                                   | 0,066992667 | 2,13E-14 | 4,37E-11  | 23,22632447  |
| solute carrier family 46, member 3                                                           | 0,06280569  | 2,36E-14 | 4,41E-11  | 23,13429425  |
| lipocalin 2                                                                                  | 87,70463759 | 2,73E-14 | 4,68E-11  | 23,00231167  |
| interferon activated gene 205                                                                | 27,46788659 | 3,94E-14 | 6,23E-11  | 22,67139468  |
| Epstein-Barr virus induced gene 3                                                            | 11,98629784 | 4,44E-14 | 6,51E-11  | 22,56260943  |
| HOP homeobox                                                                                 | 16,2224076  | 5,88E-14 | 7,50E-11  | 22,30551416  |
| interleukin 1 alpha                                                                          | 31,31125632 | 5,98E-14 | 7,50E-11  | 22,29029257  |
| tumor necrosis factor                                                                        | 19,63026656 | 6,45E-14 | 7,50E-11  | 22,22178828  |
| interferon activated gene 205                                                                | 15,11005919 | 6,57E-14 | 7,50E-11  | 22,226379821 |
| phospholipase D family, member 4                                                             | 0,07065966  | 6,95E-14 | 7,51E-11  | 22,1525515   |
| suppressor of cytokine signaling 3                                                           | 23,85967372 | 7,52E-14 | 7,72E-11  | 22,08046198  |
| nuclear factor of kappa light polypeptide gene enhancer in B-cells inhibitor, zeta cyclin D2 | 14,97898451 | 8,15E-14 | 7,97E-11  | 22,00621202  |
| interleukin 1 receptor, type II                                                              | 33,38187483 | 9,29E-14 | 8,67E-11  | 21,88506802  |
| tumor necrosis factor                                                                        | 15,44252419 | 1,09E-13 | 9,59E-11  | 21,73650347  |
| complement component 1, q subcomponent, beta polypeptide                                     | 19,20140675 | 1,12E-13 | 9,59E-11  | 21,71162899  |
| interleukin 23, alpha subunit p19                                                            | 0,072817326 | 1,24E-13 | 1,02E-10  | 21,61936294  |
| complement component 1, q subcomponent, C chain                                              | 18,75027799 | 1,33E-13 | 1,05E-10  | 21,55297939  |
| solute carrier family 7 (cationic amino acid transporter, y+ system), member 2               | 0,074712868 | 1,56E-13 | 1,19E-10  | 21,4008465   |
| epoxide hydrolase 1, microsomal                                                              | 15,92518481 | 1,74E-13 | 1,28E-10  | 21,29869418  |
| tumor necrosis factor (ligand) superfamily, member 15                                        | 0,098777017 | 2,01E-13 | 1,43E-10  | 21,16435726  |
| chemokine (C-C motif) ligand 6                                                               | 9,620017138 | 2,11E-13 | 1,45E-10  | 21,1184631   |
| interleukin 6                                                                                | 0,062176554 | 2,32E-13 | 1,46E-10  | 21,03049175  |
| FK506 binding protein 11                                                                     | 30,39723147 | 2,33E-13 | 1,46E-10  | 21,02712346  |
| C2 calcium-dependent domain containing 4B                                                    | 0,086841821 | 2,35E-13 | 1,46E-10  | 21,0205091   |
| phospholipase A1 member A                                                                    | 15,50323831 | 3,04E-13 | 1,83E-10  | 20,77702094  |
| interleukin 12a                                                                              | 11,83153107 | 3,54E-13 | 2,03E-10  | 20,63108422  |
| myosin, light polypeptide kinase                                                             | 20,34421857 | 3,57E-13 | 2,03E-10  | 20,62506492  |
| CD70 antigen                                                                                 | 10,97237404 | 3,76E-13 | 2,09E-10  | 20,57390756  |
| agrin                                                                                        | 9,879396388 | 4,43E-13 | 2,36E-10  | 20,41854256  |
| histidine decarboxylase                                                                      | 10,33561921 | 4,52E-13 | 2,36E-10  | 20,4005717   |
| prostaglandin E synthase                                                                     | 27,15001176 | 4,59E-13 | 2,36E-10  | 20,38606952  |
| orosomuroid 1                                                                                | 9,708777858 | 5,99E-13 | 3,00E-10  | 20,13195698  |
| chemokine (C-C motif) ligand 4                                                               | 11,82398018 | 6,99E-13 | 3,42E-10  | 19,98408597  |
| phospholipase A1 member A                                                                    | 13,97286513 | 7,46E-13 | 3,56E-10  | 19,92139498  |
| complement factor B                                                                          | 8,934841467 | 1,00E-12 | 4,62E-10  | 19,63870919  |
| lysosomal acid lipase A                                                                      | 9,785982742 | 1,01E-12 | 4,62E-10  | 19,62790281  |
| RIKEN cDNA 2010005H15 gene                                                                   | 0,116731139 | 1,04E-12 | 4,64E-10  | 19,6028027   |
| ectonucleotide pyrophosphatase/phosphodiesterase 2                                           | 11,42397886 | 1,24E-12 | 5,27E-10  | 19,42910414  |
| docking protein 2                                                                            | 12,17497568 | 1,25E-12 | 5,27E-10  | 19,42460102  |
| XIAP associated factor 1                                                                     | 0,122179135 | 1,26E-12 | 5,27E-10  | 19,41911594  |
| sterol O-acyltransferase 1                                                                   | 9,317350091 | 1,29E-12 | 5,30E-10  | 19,39296969  |
| interleukin 10                                                                               | 0,130918749 | 1,32E-12 | 5,31E-10  | 19,37221446  |
| CD86 antigen                                                                                 | 42,53344936 | 1,42E-12 | 5,51E-10  | 19,30312195  |
| vanin 3                                                                                      | 7,604556019 | 1,42E-12 | 5,51E-10  | 19,30038477  |
| testis expressed gene 14                                                                     | 11,51604223 | 1,46E-12 | 5,57E-10  | 19,27136724  |
| CD86 antigen                                                                                 | 8,603506895 | 1,55E-12 | 5,80E-10  | 19,21348903  |
| CD69 antigen                                                                                 | 8,615786346 | 1,59E-12 | 5,82E-10  | 19,19396068  |
| CD80 antigen                                                                                 | 10,73251087 | 1,80E-12 | 6,49E-10  | 19,07008174  |
| early growth response 2                                                                      | 7,436670443 | 1,85E-12 | 6,56E-10  | 19,04231809  |
| pentraxin related gene                                                                       | 0,13070955  | 1,92E-12 | 6,67E-10  | 19,00976768  |
| solute carrier family 4 (anion exchanger), member 8                                          | 6,978897302 | 1,98E-12 | 6,79E-10  | 18,9768377   |
| insulin-like growth factor 1                                                                 | 0,12329718  | 2,23E-12 | 7,50E-10  | 18,86130188  |
| chemokine (C-C motif) ligand 4                                                               | 0,123061355 | 2,26E-12 | 7,50E-10  | 18,84841584  |
| chemokine (C-C motif) receptor 5                                                             | 16,08021483 | 2,34E-12 | 7,62E-10  | 18,81619288  |
| G protein-coupled receptor 84                                                                | 0,122626111 | 2,57E-12 | 8,26E-10  | 18,72269175  |
| C-type lectin domain family 4, member e                                                      | 9,411723261 | 3,10E-12 | 9,69E-10  | 18,54118224  |
| linker for activation of T cells family, member 2                                            | 11,94272233 | 3,11E-12 | 9,69E-10  | 18,53699165  |
| niacin receptor 1                                                                            | 0,13490913  | 3,38E-12 | 1,03E-09  | 18,4575317   |
| ADP-ribosylation factor-like 11                                                              | 7,888472989 | 3,93E-12 | 1,19E-09  | 18,30729814  |
| N-myc downstream regulated gene 1                                                            | 0,157258241 | 4,15E-12 | 1,24E-09  | 18,25444213  |
| cyclin D2                                                                                    | 6,623836024 | 4,47E-12 | 1,31E-09  | 18,18272754  |
| CD97 antigen                                                                                 | 30,94130465 | 4,60E-12 | 1,33E-09  | 18,15361593  |
| serine (or cysteine) peptidase inhibitor, clade E, member 2                                  | 0,06110347  | 5,38E-12 | 1,52E-09  | 17,99958306  |
| secretory leukocyte peptidase inhibitor                                                      | 8,453550887 | 5,39E-12 | 1,52E-09  | 17,99784019  |
| CD93 antigen                                                                                 | 9,083502132 | 5,77E-12 | 1,60E-09  | 17,9307675   |
| diacylglycerol lipase, beta                                                                  | 0,095695162 | 5,86E-12 | 1,61E-09  | 17,91525704  |
| cytokine inducible SH2-containing protein                                                    | 0,111608937 | 6,06E-12 | 1,63E-09  | 17,88292334  |
|                                                                                              | 6,79023816  | 6,13E-12 | 1,63E-09  | 17,87151624  |

|                                                                                     |             |          |          |             |
|-------------------------------------------------------------------------------------|-------------|----------|----------|-------------|
| insulin-like growth factor 1                                                        | 0,145612373 | 6,28E-12 | 1,65E-09 | 17,84793027 |
| zinc finger protein 819                                                             | 6,7785913   | 6,54E-12 | 1,68E-09 | 17,80692738 |
| lymphoid-restricted membrane protein                                                | 0,147299994 | 6,56E-12 | 1,68E-09 | 17,80466929 |
| solute carrier family 1 (glial high affinity glutamate transporter), member 2       | 8,360304582 | 6,67E-12 | 1,68E-09 | 17,7879925  |
| signal transducing adaptor family member 1                                          | 6,226034341 | 6,69E-12 | 1,68E-09 | 17,78452799 |
| interferon induced transmembrane protein 1                                          | 5,718105077 | 7,18E-12 | 1,77E-09 | 17,71550862 |
| arachidonate 5-lipoxygenase activating protein                                      | 0,160846099 | 7,22E-12 | 1,77E-09 | 17,70974015 |
| C-type lectin domain family 4, member b1                                            | 0,119174937 | 7,39E-12 | 1,79E-09 | 17,68695114 |
| chemokine (C-C motif) ligand 9                                                      | 0,157231554 | 7,71E-12 | 1,84E-09 | 17,64418894 |
| tissue inhibitor of metalloproteinase 2                                             | 0,137793968 | 7,87E-12 | 1,86E-09 | 17,62414431 |
| RIKEN cDNA 1810011H11 gene                                                          | 0,126329562 | 8,06E-12 | 1,88E-09 | 17,60024482 |
| receptor (TNFRSF)-interacting serine-threonine kinase 2                             | 6,235767521 | 8,53E-12 | 1,97E-09 | 17,54452605 |
| solute carrier family 7 (cationic amino acid transporter, y+ system), member 2      | 9,39133129  | 9,10E-12 | 2,08E-09 | 17,48068378 |
| immunoresponse gene 1                                                               | 7,897802352 | 9,61E-12 | 2,17E-09 | 17,42666055 |
| linker for activation of T cells family, member 2                                   | 0,166657295 | 9,79E-12 | 2,19E-09 | 17,40779922 |
| allograft inflammatory factor 1                                                     | 0,17006141  | 1,00E-11 | 2,21E-09 | 17,38709571 |
| RIKEN cDNA 6430548M08 gene                                                          | 0,163385758 | 1,02E-11 | 2,23E-09 | 17,36494183 |
| arachidonate 5-lipoxygenase activating protein                                      | 0,149670944 | 1,06E-11 | 2,28E-09 | 17,33306117 |
| immunoresponse gene 1                                                               | 5,844118551 | 1,12E-11 | 2,40E-09 | 17,27455611 |
| radical S-adenosyl methionine domain containing 2                                   | 10,16140855 | 1,15E-11 | 2,43E-09 | 17,25074064 |
| cyclin-dependent kinase inhibitor 1C (P57)                                          | 0,105646338 | 1,21E-11 | 2,50E-09 | 17,19708399 |
| chemokine (C-C motif) receptor 5                                                    | 0,114576962 | 1,22E-11 | 2,50E-09 | 17,1927825  |
| growth arrest specific 6                                                            | 0,169141961 | 1,22E-11 | 2,50E-09 | 17,19076679 |
| matrix metalloproteinase 23                                                         | 0,149572147 | 1,29E-11 | 2,61E-09 | 17,13377796 |
| UDP-N-acetyl-alpha-D-galactosamine:polypeptide N-acetylgalactosaminyltransferase 9  | 0,12663328  | 1,30E-11 | 2,61E-09 | 17,1296039  |
| ras homolog gene family, member f                                                   | 8,702216254 | 1,31E-11 | 2,61E-09 | 17,12152129 |
| potassium channel tetramerisation domain containing 1                               | 10,0810911  | 1,35E-11 | 2,68E-09 | 17,08546185 |
| monoglyceride lipase                                                                | 0,108507884 | 1,45E-11 | 2,85E-09 | 17,01461685 |
| fos-like antigen 2                                                                  | 5,541809542 | 1,48E-11 | 2,87E-09 | 16,99610106 |
| acid phosphatase, prostate                                                          | 10,99369105 | 1,55E-11 | 2,98E-09 | 16,94857093 |
| peroxisome proliferator activated receptor gamma                                    | 0,094770573 | 1,63E-11 | 3,10E-09 | 16,90062149 |
| zinc finger and BTB domain containing 32                                            | 7,616883456 | 1,67E-11 | 3,16E-09 | 16,8745368  |
| CD200 antigen                                                                       | 5,8787832   | 1,86E-11 | 3,44E-09 | 16,77184708 |
| CD200 antigen                                                                       | 5,284121348 | 1,86E-11 | 3,44E-09 | 16,77147622 |
| signaling lymphocytic activation molecule family member 1                           | 5,314253671 | 1,90E-11 | 3,49E-09 | 16,74699285 |
| interferon gamma inducible protein 47                                               | 7,059030422 | 1,95E-11 | 3,55E-09 | 16,72242142 |
| pyridoxal (pyridoxine, vitamin B6) kinase                                           | 0,160343935 | 1,97E-11 | 3,55E-09 | 16,71107815 |
| family with sequence similarity 198, member B                                       | 0,076445318 | 2,14E-11 | 3,79E-09 | 16,62954561 |
| cytochrome P450, family 1, subfamily b, polypeptide 1                               | 8,019682862 | 2,14E-11 | 3,79E-09 | 16,62894186 |
| chemokine (C-C motif) ligand 17                                                     | 6,893310628 | 2,23E-11 | 3,90E-09 | 16,58980529 |
| vanin 3                                                                             | 11,60804563 | 2,24E-11 | 3,90E-09 | 16,58531096 |
| insulin-like growth factor 1                                                        | 0,123369047 | 2,41E-11 | 4,15E-09 | 16,51248633 |
| phospholipase A1 member A                                                           | 10,45473286 | 2,45E-11 | 4,20E-09 | 16,49379565 |
| predicted gene 5483                                                                 | 7,773996893 | 2,48E-11 | 4,22E-09 | 16,48079683 |
| N-myc downstream regulated gene 1                                                   | 6,932207682 | 2,61E-11 | 4,39E-09 | 16,43051191 |
| RIKEN cDNA 5430435G22 gene                                                          | 0,13043291  | 2,63E-11 | 4,39E-09 | 16,42409158 |
| arylacetamide deacetylase-like 1                                                    | 0,138468967 | 2,74E-11 | 4,54E-09 | 16,38298548 |
| guanylate binding protein 3                                                         | 5,342876659 | 3,20E-11 | 5,26E-09 | 16,22681043 |
| B and T lymphocyte associated                                                       | 11,59813382 | 3,46E-11 | 5,64E-09 | 16,14907463 |
| dynein, axonemal, heavy chain 2                                                     | 0,187460644 | 3,52E-11 | 5,70E-09 | 16,13097875 |
| alanyl (membrane) aminopeptidase                                                    | 0,165586391 | 3,60E-11 | 5,78E-09 | 16,10810671 |
| predicted gene 14207                                                                | 7,28979354  | 4,19E-11 | 6,66E-09 | 15,95688687 |
| guanylate binding protein 5                                                         | 16,31329916 | 4,22E-11 | 6,66E-09 | 15,94881459 |
| RIKEN cDNA 1700023F06 gene                                                          | 0,201275066 | 4,24E-11 | 6,66E-09 | 15,94347399 |
| vitamin D receptor                                                                  | 4,623222436 | 4,63E-11 | 7,20E-09 | 15,85619275 |
| 2'-5' oligoadenylate synthetase-like 1                                              | 6,277221158 | 4,77E-11 | 7,36E-09 | 15,82690807 |
| TSC22 domain family, member 1                                                       | 7,11325928  | 5,00E-11 | 7,58E-09 | 15,77788513 |
| cannabinoid receptor 2 (macrophage)                                                 | 0,160702012 | 5,01E-11 | 7,58E-09 | 15,77661999 |
| G protein-coupled receptor 183                                                      | 5,216756276 | 5,02E-11 | 7,58E-09 | 15,77442504 |
| syndecan binding protein (syntenin) 2                                               | 8,174473894 | 5,14E-11 | 7,70E-09 | 15,75152547 |
| DNA-damage-inducible transcript 4                                                   | 5,667727879 | 5,50E-11 | 8,20E-09 | 15,68161792 |
| formyl peptide receptor 2                                                           | 5,583053456 | 5,83E-11 | 8,62E-09 | 15,62373569 |
| CD97 antigen                                                                        | 0,067113833 | 6,06E-11 | 8,81E-09 | 15,58561867 |
| guanylate binding protein 2                                                         | 5,26406998  | 6,06E-11 | 8,81E-09 | 15,58509331 |
| plasminogen activator, tissue                                                       | 10,33089086 | 6,09E-11 | 8,81E-09 | 15,58014237 |
| chemokine (C-C motif) ligand 3                                                      | 6,508685666 | 6,15E-11 | 8,83E-09 | 15,57030352 |
| src-like adaptor                                                                    | 6,017132022 | 6,72E-11 | 9,59E-09 | 15,48002868 |
| angiopoietin-like 4                                                                 | 0,110448171 | 7,17E-11 | 1,01E-08 | 15,41499759 |
| myosin I F                                                                          | 0,218065333 | 7,20E-11 | 1,01E-08 | 15,41076793 |
| interleukin 11 receptor, alpha chain 1                                              | 0,204378223 | 7,23E-11 | 1,01E-08 | 15,40694297 |
| interferon, alpha-inducible protein 27 like 2A                                      | 6,137351242 | 7,70E-11 | 1,07E-08 | 15,34351337 |
| RIKEN cDNA 5430435G22 gene                                                          | 0,160665169 | 8,15E-11 | 1,12E-08 | 15,2862071  |
| 2'-5' oligoadenylate synthetase-like 1                                              | 10,38175558 | 8,25E-11 | 1,13E-08 | 15,27377112 |
| solute carrier family 4 (anion exchanger), member 8                                 | 0,162440169 | 8,45E-11 | 1,15E-08 | 15,24880968 |
| interferon induced transmembrane protein 1                                          | 6,658706968 | 8,98E-11 | 1,21E-08 | 15,18797636 |
| solute carrier organic anion transporter family, member 3a1                         | 5,77498327  | 9,74E-11 | 1,31E-08 | 15,10520913 |
| nuclear factor of kappa light polypeptide gene enhancer in B-cells inhibitor, alpha | 4,645773354 | 9,94E-11 | 1,33E-08 | 15,0848087  |
| G protein-coupled receptor 84                                                       | 6,5019041   | 1,01E-10 | 1,33E-08 | 15,07198198 |
| receptor (calcitonin) activity modifying protein 1                                  | 0,176975361 | 1,06E-10 | 1,39E-08 | 15,02435617 |
| filamin, beta                                                                       | 7,273481082 | 1,06E-10 | 1,39E-08 | 15,01559076 |
| dynein, axonemal, heavy chain 2                                                     | 0,21679903  | 1,07E-10 | 1,39E-08 | 15,01198084 |



|                                                                                     |             |          |          |             |
|-------------------------------------------------------------------------------------|-------------|----------|----------|-------------|
| megakaryocyte-associated tyrosine kinase                                            | 0,158516464 | 1,14E-10 | 1,47E-08 | 14,94706239 |
| dipeptidylpeptidase 4                                                               | 0,239412326 | 1,17E-10 | 1,50E-08 | 14,92379445 |
| cellular repressor of E1A-stimulated genes 1                                        | 0,228517606 | 1,23E-10 | 1,58E-08 | 14,86528934 |
| cannabinoid receptor 2 (macrophage)                                                 | 0,226669357 | 1,25E-10 | 1,59E-08 | 14,85267512 |
| cytohesin 4                                                                         | 0,244870581 | 1,30E-10 | 1,64E-08 | 14,80929519 |
| spinstar homolog 3 (Drosophila)                                                     | 6,488272945 | 1,36E-10 | 1,70E-08 | 14,77072423 |
| carbonyl reductase 3                                                                | 0,239119305 | 1,43E-10 | 1,77E-08 | 14,71953747 |
| RAS p21 protein activator 3                                                         | 0,232819037 | 1,44E-10 | 1,79E-08 | 14,70582664 |
| tumor necrosis factor, alpha-induced protein 3                                      | 5,153924305 | 1,52E-10 | 1,86E-08 | 14,65594032 |
| pentraxin related gene                                                              | 7,174953035 | 1,52E-10 | 1,86E-08 | 14,65343828 |
| cyclin-dependent kinase inhibitor 2C (p18, inhibits CDK4)                           | 0,16374558  | 1,59E-10 | 1,93E-08 | 14,61085138 |
| cyclin-dependent kinase 20                                                          | 0,259051908 | 1,68E-10 | 2,03E-08 | 14,55271055 |
| pro-platelet basic protein                                                          | 0,177543486 | 1,73E-10 | 2,08E-08 | 14,52040135 |
| vesicle amine transport protein 1 homolog (T californica)                           | 0,250758598 | 1,78E-10 | 2,13E-08 | 14,49106188 |
| CD14 antigen                                                                        | 5,022733587 | 1,81E-10 | 2,15E-08 | 14,47498136 |
| zinc finger, DHHC domain containing 14                                              | 0,135766997 | 1,83E-10 | 2,16E-08 | 14,46291855 |
| tumor necrosis factor (ligand) superfamily, member 9                                | 5,936954641 | 1,84E-10 | 2,16E-08 | 14,46107031 |
| G protein-coupled receptor 120                                                      | 0,169323427 | 1,88E-10 | 2,19E-08 | 14,43584754 |
| isocitrate dehydrogenase 1 (NADP+), soluble                                         | 0,230117046 | 1,89E-10 | 2,19E-08 | 14,43454919 |
| C-type lectin domain family 4, member e                                             | 9,831518706 | 2,07E-10 | 2,39E-08 | 14,33795871 |
| sphingomyelin phosphodiesterase, acid-like 3B                                       | 3,937242569 | 2,08E-10 | 2,39E-08 | 14,33426091 |
| caspase 4, apoptosis-related cysteine peptidase                                     | 3,876238097 | 2,15E-10 | 2,44E-08 | 14,30387375 |
| RAB11 family interacting protein 5 (class I)                                        | 0,219365229 | 2,15E-10 | 2,44E-08 | 14,3036844  |
| CD40 antigen                                                                        | 4,264182306 | 2,21E-10 | 2,49E-08 | 14,27159571 |
| zinc finger CCHC type containing 12A                                                | 4,714163322 | 2,23E-10 | 2,49E-08 | 14,26261936 |
| solute carrier family 40 (iron-regulated transporter), member 1                     | 0,253860316 | 2,23E-10 | 2,49E-08 | 14,26250082 |
| G protein-coupled receptor 171                                                      | 5,962646906 | 2,25E-10 | 2,50E-08 | 14,25413509 |
| U6 small nuclear RNA                                                                | 0,218409602 | 2,32E-10 | 2,56E-08 | 14,22422435 |
| killer cell lectin-like receptor, subfamily A, member 17                            | 0,171688929 | 2,34E-10 | 2,57E-08 | 14,21476651 |
| RAB11 family interacting protein 5 (class I)                                        | 0,222063338 | 2,36E-10 | 2,58E-08 | 14,20480135 |
| Fas (TNF receptor superfamily member 6)                                             | 0,250433576 | 2,40E-10 | 2,61E-08 | 14,18819665 |
| serine (or cysteine) peptidase inhibitor, clade B, member 2                         | 7,368360864 | 2,44E-10 | 2,63E-08 | 14,17254716 |
| C-type lectin domain family 7, member a                                             | 0,134475554 | 2,45E-10 | 2,63E-08 | 14,16692992 |
| neuropilin 1                                                                        | 0,178612668 | 2,46E-10 | 2,63E-08 | 14,16506778 |
| troponin I, skeletal, fast 2                                                        | 0,232815113 | 2,49E-10 | 2,64E-08 | 14,1506329  |
| chemokine (C-C motif) receptor 5                                                    | 0,163153635 | 2,50E-10 | 2,64E-08 | 14,15018713 |
| CD200 antigen                                                                       | 4,142462234 | 2,53E-10 | 2,67E-08 | 14,13534081 |
| transcription factor 4                                                              | 3,811897072 | 2,55E-10 | 2,68E-08 | 14,12643042 |
| a disintegrin and metallopeptidase domain 23                                        | 0,238893777 | 2,64E-10 | 2,76E-08 | 14,09086224 |
| transmembrane protein 154                                                           | 0,189021785 | 2,67E-10 | 2,77E-08 | 14,08006522 |
| tripartite motif-containing 30A                                                     | 8,062383415 | 2,83E-10 | 2,92E-08 | 14,02074089 |
| thromboxane A synthase 1, platelet                                                  | 0,141661413 | 2,89E-10 | 2,97E-08 | 13,99903109 |
| DEXH (Asp-Glu-X-His) box polypeptide 58                                             | 4,858769735 | 2,92E-10 | 2,99E-08 | 13,98948414 |
| mannose receptor, C type 1                                                          | 0,10785917  | 2,96E-10 | 3,01E-08 | 13,9759509  |
| protein tyrosine phosphatase-like A domain containing 1                             | 3,693871284 | 3,01E-10 | 3,04E-08 | 13,96049214 |
| leucine-rich repeats and immunoglobulin-like domains 1                              | 4,365040978 | 3,09E-10 | 3,11E-08 | 13,93261883 |
| trophoblast glycoprotein                                                            | 5,319846639 | 3,18E-10 | 3,19E-08 | 13,90199239 |
| dual specificity phosphatase 4                                                      | 5,305005926 | 3,23E-10 | 3,22E-08 | 13,88609074 |
| tumor necrosis factor receptor superfamily, member 9                                | 4,67768832  | 3,43E-10 | 3,41E-08 | 13,82480902 |
| nuclear factor of kappa light polypeptide gene enhancer in B-cells inhibitor, alpha | 3,958555164 | 3,46E-10 | 3,41E-08 | 13,81791348 |
| apoptosis-associated tyrosine kinase                                                | 0,205084572 | 3,50E-10 | 3,44E-08 | 13,80545612 |
| deoxyribonuclease II alpha                                                          | 0,230348141 | 3,51E-10 | 3,44E-08 | 13,80151957 |
| Meis homeobox 1                                                                     | 4,608390768 | 3,55E-10 | 3,45E-08 | 13,79189258 |
| Fas (TNF receptor superfamily member 6)                                             | 0,262019864 | 3,57E-10 | 3,46E-08 | 13,78406071 |
| selenoprotein P, plasma, 1                                                          | 0,190213387 | 3,63E-10 | 3,50E-08 | 13,76693683 |
| lysophosphatidic acid receptor 6                                                    | 0,237973497 | 3,79E-10 | 3,64E-08 | 13,72254682 |
| epithelial stromal interaction 1 (breast)                                           | 0,285244464 | 4,03E-10 | 3,85E-08 | 13,66090345 |
| phospholipase A2, group IVF                                                         | 4,022902892 | 4,08E-10 | 3,88E-08 | 13,64738458 |
| benzodiazepine receptor associated protein 1                                        | 0,203834613 | 4,13E-10 | 3,91E-08 | 13,63489118 |
| poliovirus receptor                                                                 | 5,984330644 | 4,16E-10 | 3,92E-08 | 13,62748821 |
| three prime repair exonuclease 1                                                    | 3,597886081 | 4,19E-10 | 3,92E-08 | 13,62032595 |
| basic leucine zipper transcription factor, ATF-like                                 | 4,339733481 | 4,20E-10 | 3,92E-08 | 13,61947255 |
| leucine rich repeat containing 14B                                                  | 0,151383608 | 4,23E-10 | 3,93E-08 | 13,61188175 |
| histidine ammonia lyase                                                             | 0,255408032 | 4,26E-10 | 3,93E-08 | 13,60375652 |
| lysosomal acid lipase A                                                             | 0,151354675 | 4,27E-10 | 3,93E-08 | 13,6020146  |
| interferon induced transmembrane protein 1                                          | 3,554229549 | 4,28E-10 | 3,93E-08 | 13,59886331 |
| 3'-phosphoadenosine 5'-phosphosulfate synthase 2                                    | 0,29882538  | 4,57E-10 | 4,17E-08 | 13,53196979 |
| two pore segment channel 2                                                          | 0,221209122 | 4,60E-10 | 4,18E-08 | 13,52548264 |
| C-type lectin domain family 7, member a                                             | 0,109925963 | 4,66E-10 | 4,22E-08 | 13,51251809 |
| tissue inhibitor of metalloproteinase 1                                             | 4,377852818 | 4,73E-10 | 4,26E-08 | 13,49686971 |
| Jun dimerization protein 2                                                          | 4,815147889 | 4,77E-10 | 4,26E-08 | 13,48964531 |
| guanylate binding protein 2                                                         | 5,119929661 | 4,77E-10 | 4,26E-08 | 13,48761944 |
| potassium channel tetramerisation domain containing 14                              | 4,004256446 | 4,89E-10 | 4,35E-08 | 13,46391402 |
| myosin, light polypeptide kinase                                                    | 5,620013585 | 5,14E-10 | 4,54E-08 | 13,41133395 |
| three prime repair exonuclease 1                                                    | 3,639871289 | 5,15E-10 | 4,54E-08 | 13,41064727 |
| v-myc myelocytomatosis viral oncogene homolog 1, lung carcinoma derived (avian)     | 0,205434392 | 5,31E-10 | 4,66E-08 | 13,37898416 |
| guanylate binding protein 3                                                         | 5,587296703 | 5,50E-10 | 4,79E-08 | 13,34318081 |
| CD40 antigen                                                                        | 3,593923878 | 5,51E-10 | 4,79E-08 | 13,34142677 |
| interleukin 2 receptor, alpha chain                                                 | 4,165498066 | 5,53E-10 | 4,80E-08 | 13,33690946 |
| immediate early response 3                                                          | 5,055724442 | 5,57E-10 | 4,81E-08 | 13,33008628 |
| thromboxane A synthase 1, platelet                                                  | 0,210927427 | 5,77E-10 | 4,92E-08 | 13,29417445 |

|                                                                               |             |          |          |             |
|-------------------------------------------------------------------------------|-------------|----------|----------|-------------|
| thymidylate synthase                                                          | 3,897238262 | 5,77E-10 | 4,92E-08 | 13,29343287 |
| E2F transcription factor 2                                                    | 0,216643153 | 5,78E-10 | 4,92E-08 | 13,29273756 |
| tissue inhibitor of metalloproteinase 1                                       | 4,040382426 | 5,83E-10 | 4,95E-08 | 13,28390257 |
| histidine decarboxylase                                                       | 4,049323454 | 5,89E-10 | 4,98E-08 | 13,27228311 |
| solute carrier family 1 (glial high affinity glutamate transporter), member 2 | 3,88472251  | 6,05E-10 | 5,09E-08 | 13,24566747 |
| phospholipase C, beta 2                                                       | 0,22838119  | 6,07E-10 | 5,09E-08 | 13,24261215 |
| suppression of tumorigenicity 7                                               | 4,901336423 | 6,20E-10 | 5,18E-08 | 13,22047239 |
| CD28 antigen                                                                  | 0,260530095 | 6,23E-10 | 5,19E-08 | 13,21459212 |
| epithelial membrane protein 1                                                 | 0,206198127 | 6,43E-10 | 5,31E-08 | 13,18238601 |
| apolipoprotein E                                                              | 0,187931596 | 6,43E-10 | 5,31E-08 | 13,18232115 |
| Fc receptor, IgG, low affinity IV                                             | 0,272717762 | 6,56E-10 | 5,39E-08 | 13,162986   |
| protein kinase C, beta                                                        | 0,246893946 | 6,61E-10 | 5,39E-08 | 13,15527671 |
| eukaryotic translation initiation factor 2-alpha kinase 2                     | 4,402477337 | 6,61E-10 | 5,39E-08 | 13,1543329  |
| RIKEN cDNA 1700029F09 gene                                                    | 3,505890273 | 7,12E-10 | 5,78E-08 | 13,07836276 |
| RIKEN cDNA 2310016C08 gene                                                    | 6,766134058 | 7,19E-10 | 5,81E-08 | 13,06853844 |
| schlafen 1                                                                    | 4,62217647  | 7,25E-10 | 5,84E-08 | 13,05936196 |
| CD40 antigen                                                                  | 3,39083772  | 7,36E-10 | 5,90E-08 | 13,04474462 |
| transglutaminase 2, C polypeptide                                             | 3,648878396 | 7,61E-10 | 6,08E-08 | 13,01049331 |
| caspase 4, apoptosis-related cysteine peptidase                               | 4,938110397 | 8,15E-10 | 6,48E-08 | 12,94017994 |
| collagen, type IV, alpha 1                                                    | 5,282450092 | 8,21E-10 | 6,48E-08 | 12,9318162  |
| triggering receptor expressed on myeloid cells 2                              | 0,136752229 | 8,22E-10 | 6,48E-08 | 12,93075964 |
| E2F transcription factor 2                                                    | 0,227809328 | 8,24E-10 | 6,48E-08 | 12,9283562  |
| ryanodine receptor 1, skeletal muscle                                         | 0,230790641 | 8,26E-10 | 6,48E-08 | 12,92634189 |
| interferon activated gene 205                                                 | 4,358779689 | 8,54E-10 | 6,67E-08 | 12,89192032 |
| myosin, light polypeptide kinase                                              | 5,002070051 | 8,61E-10 | 6,70E-08 | 12,88362013 |
| monoglyceride lipase                                                          | 0,164906692 | 8,89E-10 | 6,89E-08 | 12,85102711 |
| RAD54 like ( <i>S. cerevisiae</i> )                                           | 0,214618345 | 8,95E-10 | 6,89E-08 | 12,8434438  |
| interferon induced transmembrane protein 1                                    | 8,488196769 | 8,96E-10 | 6,89E-08 | 12,84285597 |
| IQ motif containing GTPase activating protein 2                               | 0,219582091 | 9,04E-10 | 6,93E-08 | 12,83390689 |
| Ena-vasodilator stimulated phosphoprotein                                     | 0,222834721 | 9,52E-10 | 7,27E-08 | 12,78087559 |
| killer cell lectin-like receptor, subfamily A, member 3                       | 0,31245894  | 9,78E-10 | 7,44E-08 | 12,75300813 |
| predicted gene 4980                                                           | 0,242864065 | 9,99E-10 | 7,57E-08 | 12,73083705 |
| cyclin-dependent kinase 20                                                    | 0,281603707 | 1,03E-09 | 7,82E-08 | 12,69466352 |
| RIKEN cDNA A130040M12 gene                                                    | 5,961110404 | 1,08E-09 | 8,15E-08 | 12,64805589 |
| phospholipase A2, group XV                                                    | 0,289343478 | 1,13E-09 | 8,48E-08 | 12,60341986 |
| heme binding protein 1                                                        | 0,200919014 | 1,15E-09 | 8,61E-08 | 12,58429594 |
| secretory carrier membrane protein 5                                          | 0,212750282 | 1,16E-09 | 8,61E-08 | 12,58084693 |
| glycoprotein (transmembrane) nmb                                              | 0,24798079  | 1,24E-09 | 9,18E-08 | 12,51101949 |
| solute carrier family 24 (sodium/potassium/calcium exchanger), member 6       | 0,285826604 | 1,28E-09 | 9,40E-08 | 12,47542106 |
| amiloride binding protein 1 (amine oxidase, copper-containing)                | 0,255484494 | 1,28E-09 | 9,40E-08 | 12,47494951 |
| sphingomyelin phosphodiesterase, acid-like 3A                                 | 0,241931516 | 1,28E-09 | 9,40E-08 | 12,47490539 |
| acid phosphatase, prostate                                                    | 5,409836577 | 1,29E-09 | 9,45E-08 | 12,4664644  |
| poliovirus receptor                                                           | 5,638424896 | 1,33E-09 | 9,72E-08 | 12,43382364 |
| synaptogyrin 1                                                                | 0,180591234 | 1,36E-09 | 9,90E-08 | 12,41095966 |
| chemokine (C-X-C motif) receptor 5                                            | 5,253956386 | 1,38E-09 | 9,97E-08 | 12,39998164 |
| adenosine kinase                                                              | 0,265761343 | 1,50E-09 | 1,08E-07 | 12,31404681 |
| CDK5 regulatory subunit associated protein 1-like 1                           | 0,31630364  | 1,51E-09 | 1,09E-07 | 12,30452079 |
| CD82 antigen                                                                  | 3,70607831  | 1,54E-09 | 1,10E-07 | 12,28571803 |
| Rho-related BTB domain containing 1                                           | 3,26361739  | 1,56E-09 | 1,11E-07 | 12,27312239 |
| allograft inflammatory factor 1                                               | 0,218031441 | 1,59E-09 | 1,13E-07 | 12,25077663 |
| tripartite motif-containing 30D                                               | 3,976733143 | 1,62E-09 | 1,15E-07 | 12,23601449 |
| toll-like receptor 13                                                         | 0,20206853  | 1,63E-09 | 1,15E-07 | 12,22935086 |
| vascular endothelial growth factor A                                          | 4,010758897 | 1,63E-09 | 1,15E-07 | 12,22623845 |
| caveolin 1, caveolae protein                                                  | 3,3358333   | 1,64E-09 | 1,15E-07 | 12,21914185 |
| integrin beta 7                                                               | 0,222261568 | 1,65E-09 | 1,15E-07 | 12,21211676 |
| leupaxin                                                                      | 0,24606688  | 1,66E-09 | 1,15E-07 | 12,21013291 |
| transmembrane protein 8 (five membrane-spanning domains)                      | 0,26000127  | 1,66E-09 | 1,15E-07 | 12,2077486  |
| Rho GTPase activating protein 25                                              | 0,329676269 | 1,67E-09 | 1,15E-07 | 12,20512585 |
| acidic (leucine-rich) nuclear phosphoprotein 32 family, member A              | 3,879396821 | 1,72E-09 | 1,18E-07 | 12,17239656 |
| tumor necrosis factor receptor superfamily, member 21                         | 0,227361638 | 1,72E-09 | 1,18E-07 | 12,17028783 |
| acyl-CoA thioesterase 1                                                       | 0,197507687 | 1,73E-09 | 1,18E-07 | 12,16760108 |
| interferon regulatory factor 7                                                | 5,478922896 | 1,73E-09 | 1,18E-07 | 12,16434997 |
| tumor necrosis factor receptor superfamily, member 9                          | 4,514101872 | 1,74E-09 | 1,19E-07 | 12,15788293 |
| single-stranded DNA binding protein 3                                         | 3,240140434 | 1,82E-09 | 1,23E-07 | 12,11472974 |
| syndecan binding protein (syntenin) 2                                         | 4,167591462 | 1,91E-09 | 1,28E-07 | 12,06430877 |
| BCL2-like 14 (apoptosis facilitator)                                          | 0,233852451 | 1,91E-09 | 1,28E-07 | 12,0627545  |
| solute carrier family 9 (sodium/hydrogen exchanger), member 3 regulator 2     | 0,238383949 | 1,92E-09 | 1,28E-07 | 12,06043306 |
| tubulin, beta 2B                                                              | 0,29105782  | 1,92E-09 | 1,28E-07 | 12,05941682 |
| phosphatidic acid phosphatase type 2A                                         | 4,406596601 | 1,93E-09 | 1,29E-07 | 12,05260587 |
| RAB26, member RAS oncogene family                                             | 3,653448341 | 1,96E-09 | 1,30E-07 | 12,03984309 |
| histocompatibility 2, class II, locus Mb2                                     | 4,047095415 | 2,00E-09 | 1,33E-07 | 12,01517554 |
| dual specificity phosphatase 14                                               | 4,965327919 | 2,05E-09 | 1,35E-07 | 11,99155168 |
| cytochrome P450, family 27, subfamily a, polypeptide 1                        | 0,294829772 | 2,07E-09 | 1,36E-07 | 11,98288805 |
| RIKEN cDNA 1810011H11 gene                                                    | 0,19006117  | 2,12E-09 | 1,39E-07 | 11,95724667 |
| a disintegrin and metallopeptidase domain 11                                  | 0,195397294 | 2,12E-09 | 1,39E-07 | 11,9568403  |
| mannosidase 2, alpha B1                                                       | 0,308062963 | 2,16E-09 | 1,41E-07 | 11,93591575 |
| histocompatibility 2, Q region locus 8                                        | 3,369051889 | 2,27E-09 | 1,47E-07 | 11,88749512 |
| FXFD domain-containing ion transport regulator 2                              | 0,204483401 | 2,29E-09 | 1,48E-07 | 11,87793595 |
| F-box protein 32                                                              | 3,342679793 | 2,31E-09 | 1,49E-07 | 11,86844804 |
| dual specificity phosphatase 16                                               | 3,073812429 | 2,32E-09 | 1,49E-07 | 11,86465254 |
| Fc receptor, IgG, low affinity III                                            | 0,189674722 | 2,35E-09 | 1,51E-07 | 11,85251596 |

|                                                                                   |             |          |          |             |
|-----------------------------------------------------------------------------------|-------------|----------|----------|-------------|
| amylase-1,6-galactosidase, 4-alpha-galactanotransferase                           | 0,307027089 | 2,35E-09 | 1,51E-07 | 11,84899291 |
| sema domain, immunoglobulin domain (Ig), and GPI membrane anchor, (semaphorin) 7A | 3,198979335 | 2,36E-09 | 1,51E-07 | 11,84461298 |
| sema domain, immunoglobulin domain (Ig), and GPI membrane anchor, (semaphorin) 7A | 3,916152746 | 2,53E-09 | 1,61E-07 | 11,77653504 |
| TYRO protein tyrosine kinase binding protein                                      | 0,304662965 | 2,56E-09 | 1,62E-07 | 11,76249095 |
| pleckstrin 2                                                                      | 3,951618685 | 2,57E-09 | 1,63E-07 | 11,75709287 |
| CD300 antigen like family member B                                                | 0,313082688 | 2,61E-09 | 1,64E-07 | 11,74372927 |
| aldehyde dehydrogenase 2, mitochondrial                                           | 0,32925105  | 2,63E-09 | 1,65E-07 | 11,73645759 |
| phospholipase D family, member 3                                                  | 0,29637518  | 2,66E-09 | 1,66E-07 | 11,72468836 |
| tetratricopeptide repeat domain 39A                                               | 0,322634645 | 2,69E-09 | 1,68E-07 | 11,70990241 |
| interleukin 18 receptor 1                                                         | 0,287360222 | 2,75E-09 | 1,71E-07 | 11,68937521 |
| vascular endothelial growth factor A                                              | 3,651606732 | 2,77E-09 | 1,72E-07 | 11,68032164 |
| serine/threonine kinase 39, STE20/SPS1 homolog (yeast)                            | 3,29140387  | 2,86E-09 | 1,77E-07 | 11,64883086 |
| LIM domain only 2                                                                 | 0,226887966 | 2,91E-09 | 1,79E-07 | 11,63071084 |
| xanthine dehydrogenase                                                            | 0,336364404 | 2,93E-09 | 1,80E-07 | 11,62282714 |
| EF-hand calcium binding domain 4A                                                 | 0,264882198 | 2,99E-09 | 1,83E-07 | 11,60347127 |
| RIKEN cDNA 1500031L02 gene                                                        | 3,38076767  | 2,99E-09 | 1,83E-07 | 11,60124263 |
| vascular cell adhesion molecule 1                                                 | 2,980552056 | 3,01E-09 | 1,83E-07 | 11,59650174 |
| serine (or cysteine) peptidase inhibitor, clade B, member 1a                      | 0,304116713 | 3,03E-09 | 1,84E-07 | 11,58992949 |
| protein kinase C, beta                                                            | 0,297373336 | 3,14E-09 | 1,90E-07 | 11,5505333  |
| serine (or cysteine) peptidase inhibitor, clade B, member 6a                      | 0,327142695 | 3,18E-09 | 1,92E-07 | 11,53867286 |
| pleckstrin                                                                        | 4,987847642 | 3,24E-09 | 1,95E-07 | 11,5201323  |
| growth arrest and DNA-damage-inducible 45 alpha                                   | 0,310979853 | 3,28E-09 | 1,97E-07 | 11,50686267 |
| Kruppel-like factor 7 (ubiquitous)                                                | 3,572501382 | 3,32E-09 | 1,99E-07 | 11,49363451 |
| expressed sequence AA467197                                                       | 2,941986713 | 3,35E-09 | 2,00E-07 | 11,48537111 |
| DDHD domain containing 1                                                          | 0,337555769 | 3,55E-09 | 2,11E-07 | 11,42472451 |
| T cell-interacting, activating receptor on myeloid cells 1                        | 4,059424379 | 3,57E-09 | 2,12E-07 | 11,41943452 |
| phosphoinositide-3-kinase, catalytic, gamma polypeptide                           | 3,067617084 | 3,58E-09 | 2,12E-07 | 11,41631054 |
| vitamin D receptor                                                                | 3,152134474 | 3,62E-09 | 2,13E-07 | 11,40578232 |
| synaptogyrin 1                                                                    | 0,248978422 | 3,66E-09 | 2,15E-07 | 11,39415089 |
| family with sequence similarity 63, member A                                      | 0,338449377 | 3,73E-09 | 2,19E-07 | 11,3743968  |
| peroxisome proliferative activated receptor, gamma, coactivator 1 beta            | 0,30228751  | 3,81E-09 | 2,23E-07 | 11,35134422 |
| protein kinase C and casein kinase substrate in neurons 1                         | 0,291828602 | 3,82E-09 | 2,23E-07 | 11,3481112  |
| reticulon 1                                                                       | 3,849938008 | 3,83E-09 | 2,23E-07 | 11,34603029 |
| vasohibin 1                                                                       | 3,558231665 | 3,86E-09 | 2,24E-07 | 11,33888821 |
| lipoprotein lipase                                                                | 0,271518783 | 3,98E-09 | 2,30E-07 | 11,30725    |
| progressive ankylosis                                                             | 0,224231928 | 4,05E-09 | 2,34E-07 | 11,28874993 |
| BCL2-like 11 (apoptosis facilitator)                                              | 3,218889637 | 4,15E-09 | 2,39E-07 | 11,26235646 |
| TRAF3 interacting protein 2                                                       | 3,795901901 | 4,30E-09 | 2,46E-07 | 11,22676351 |
| apolipoprotein L 7c pseudogene                                                    | 0,214640227 | 4,31E-09 | 2,46E-07 | 11,22527436 |
| RIKEN cDNA 2310014L17 gene                                                        | 0,203868374 | 4,32E-09 | 2,47E-07 | 11,22177339 |
| glutaminase 2 (liver, mitochondrial)                                              | 3,309326504 | 4,52E-09 | 2,57E-07 | 11,17532762 |
| chemokine (C-C motif) receptor-like 2                                             | 2,746128107 | 4,60E-09 | 2,61E-07 | 11,15819478 |
| RIKEN cDNA 1190002H23 gene                                                        | 3,82069454  | 4,64E-09 | 2,63E-07 | 11,14744268 |
| myoferlin                                                                         | 0,301608988 | 4,75E-09 | 2,68E-07 | 11,12368099 |
| interleukin 1 receptor antagonist                                                 | 3,370057897 | 4,91E-09 | 2,77E-07 | 11,08879763 |
| RIKEN cDNA 5031439G07 gene                                                        | 0,25879283  | 4,96E-09 | 2,78E-07 | 11,07997633 |
| RIKEN cDNA 2310016C08 gene                                                        | 4,667870841 | 4,98E-09 | 2,78E-07 | 11,07418024 |
| matrix metalloproteinase 13                                                       | 5,985787712 | 4,99E-09 | 2,78E-07 | 11,07395129 |
| protein kinase C, beta                                                            | 0,293886436 | 5,10E-09 | 2,84E-07 | 11,04981999 |
| YdjC homolog (bacterial)                                                          | 0,295431798 | 5,13E-09 | 2,85E-07 | 11,0442745  |
| zinc finger, RAN-binding domain containing 3                                      | 0,213463029 | 5,19E-09 | 2,87E-07 | 11,03310113 |
| killer cell lectin-like receptor subfamily B member 1B                            | 3,390718977 | 5,33E-09 | 2,94E-07 | 11,00456952 |
| vitamin D receptor                                                                | 4,387827567 | 5,35E-09 | 2,95E-07 | 10,99994614 |
| hypothetical LOC100503337                                                         | 3,126065516 | 5,36E-09 | 2,95E-07 | 10,99837939 |
| filamin binding LIM protein 1                                                     | 0,266962371 | 5,50E-09 | 3,01E-07 | 10,97180886 |
| F-box protein 32                                                                  | 3,219656139 | 5,71E-09 | 3,12E-07 | 10,93381874 |
| interleukin 1 receptor antagonist                                                 | 4,003127526 | 5,79E-09 | 3,15E-07 | 10,91975987 |
| tight junction protein 2                                                          | 4,316277646 | 5,83E-09 | 3,17E-07 | 10,91225061 |
| coiled-coil-helix-coiled-coil-helix domain containing 10                          | 0,345239975 | 5,85E-09 | 3,17E-07 | 10,90908197 |
| purine-nucleoside phosphorylase 2                                                 | 6,102212475 | 5,95E-09 | 3,22E-07 | 10,89046467 |
| pro-platelet basic protein                                                        | 0,209409191 | 5,97E-09 | 3,22E-07 | 10,88676401 |
| leukemia inhibitory factor                                                        | 4,299455505 | 6,17E-09 | 3,32E-07 | 10,85366849 |
| poliovirus receptor                                                               | 5,263699229 | 6,23E-09 | 3,34E-07 | 10,84303965 |
| dipeptidylpeptidase 7                                                             | 0,347494806 | 6,40E-09 | 3,42E-07 | 10,81521114 |
| CD93 antigen                                                                      | 0,19035478  | 6,41E-09 | 3,42E-07 | 10,81370523 |
| apolipoprotein C-II                                                               | 0,314349706 | 6,60E-09 | 3,51E-07 | 10,78338472 |
| ras homolog gene family, member D                                                 | 4,652324523 | 6,61E-09 | 3,51E-07 | 10,78210271 |
| interferon induced transmembrane protein 1                                        | 2,883893758 | 6,65E-09 | 3,52E-07 | 10,77653431 |
| CD86 antigen                                                                      | 4,047217467 | 6,71E-09 | 3,54E-07 | 10,76688513 |
| RIKEN cDNA 5730469M10 gene                                                        | 0,349767044 | 6,79E-09 | 3,58E-07 | 10,75436969 |
| cytochrome P450, family 27, subfamily a, polypeptide 1                            | 0,258661149 | 6,82E-09 | 3,58E-07 | 10,74981047 |
| indoleamine 2,3-dioxygenase 1                                                     | 3,587303069 | 6,84E-09 | 3,58E-07 | 10,74621869 |
| calcium channel, voltage-dependent, alpha 2/delta subunit 2                       | 0,270150039 | 6,85E-09 | 3,58E-07 | 10,74543218 |
| integrin beta 5                                                                   | 0,302892339 | 7,00E-09 | 3,64E-07 | 10,72286121 |
| poly (ADP-ribose) polymerase family, member 12                                    | 3,100915351 | 7,00E-09 | 3,64E-07 | 10,7228128  |
| interferon-induced protein with tetratricopeptide repeats 3                       | 3,850552144 | 7,07E-09 | 3,67E-07 | 10,71245979 |
| SEC14 and spectrin domains 1                                                      | 2,853339344 | 7,10E-09 | 3,67E-07 | 10,70790787 |
| tumor necrosis factor (ligand) superfamily, member 4                              | 3,834398384 | 7,25E-09 | 3,73E-07 | 10,68565117 |
| enolase 3, beta muscle                                                            | 0,298383855 | 7,26E-09 | 3,73E-07 | 10,68489847 |
| uridine phosphorylase 1                                                           | 4,23035514  | 7,27E-09 | 3,73E-07 | 10,68400411 |
| BTB (POZ) domain containing 11                                                    | 0,330786639 | 7,36E-09 | 3,77E-07 | 10,67062683 |

|                                                                               |             |          |          |             |
|-------------------------------------------------------------------------------|-------------|----------|----------|-------------|
| kallikrein 1-related peptidase b1                                             | 0,336187613 | 7,50E-09 | 3,83E-07 | 10,65062543 |
| cDNA sequence BC046404                                                        | 2,85054103  | 7,51E-09 | 3,83E-07 | 10,65010317 |
| docking protein 3                                                             | 0,367247471 | 7,53E-09 | 3,83E-07 | 10,6466395  |
| filamin, beta                                                                 | 5,303949071 | 7,64E-09 | 3,87E-07 | 10,63223869 |
| receptor accessory protein 1                                                  | 0,302647336 | 7,71E-09 | 3,90E-07 | 10,62222868 |
| actin, gamma 2, smooth muscle, enteric                                        | 0,257669336 | 7,76E-09 | 3,92E-07 | 10,61586919 |
| C-type lectin domain family 4, member a3                                      | 0,267692737 | 7,78E-09 | 3,92E-07 | 10,6129633  |
| lysosomal-associated membrane protein 1                                       | 0,379207584 | 7,87E-09 | 3,95E-07 | 10,60137527 |
| LAG1 homolog, ceramide synthase 5                                             | 0,357309739 | 7,94E-09 | 3,98E-07 | 10,59200539 |
| serglycin                                                                     | 3,892362821 | 8,04E-09 | 4,02E-07 | 10,57869215 |
| interferon-induced protein with tetratricopeptide repeats 3                   | 6,21057933  | 8,19E-09 | 4,09E-07 | 10,55952363 |
| Sp140 nuclear body protein                                                    | 3,957125883 | 8,23E-09 | 4,09E-07 | 10,55469871 |
| claudin 10                                                                    | 0,360929919 | 8,34E-09 | 4,14E-07 | 10,54080529 |
| KiSS-1 metastasis-suppressor                                                  | 2,725369309 | 8,40E-09 | 4,16E-07 | 10,53413757 |
| reticulon 1                                                                   | 3,128258227 | 8,44E-09 | 4,17E-07 | 10,52861989 |
| low density lipoprotein-related protein 12                                    | 0,371686339 | 8,49E-09 | 4,18E-07 | 10,52295554 |
| Von Willebrand factor homolog                                                 | 0,340581325 | 8,73E-09 | 4,26E-07 | 10,49391799 |
| glutaminase 2 (liver, mitochondrial)                                          | 3,42917598  | 8,73E-09 | 4,26E-07 | 10,49381132 |
| SLAM family member 8                                                          | 0,264447096 | 8,73E-09 | 4,26E-07 | 10,49334069 |
| serine/threonine kinase 17b (apoptosis-inducing)                              | 2,696701445 | 8,74E-09 | 4,26E-07 | 10,49304419 |
| signal-induced proliferation-associated 1 like 1                              | 2,969003269 | 8,74E-09 | 4,26E-07 | 10,49247999 |
| carbonic anhydrase 13                                                         | 3,077998752 | 9,12E-09 | 4,42E-07 | 10,44842792 |
| branched chain aminotransferase 2, mitochondrial                              | 0,373751059 | 9,32E-09 | 4,51E-07 | 10,42636829 |
| CD84 antigen                                                                  | 0,247113137 | 9,38E-09 | 4,53E-07 | 10,41945066 |
| phosphoinositide-3-kinase, catalytic, gamma polypeptide                       | 3,243829532 | 9,44E-09 | 4,55E-07 | 10,41297662 |
| TNF receptor associated factor 4                                              | 3,146009255 | 9,85E-09 | 4,74E-07 | 10,36901884 |
| Rho GTPase activating protein 24                                              | 0,339110866 | 1,01E-08 | 4,86E-07 | 10,33943183 |
| spermatogenesis associated 13                                                 | 2,844258065 | 1,04E-08 | 4,98E-07 | 10,31169062 |
| thymidylate synthase, pseudogene                                              | 3,700874661 | 1,07E-08 | 5,12E-07 | 10,28189518 |
| RIKEN cDNA A530032D15Rik gene                                                 | 2,966456963 | 1,09E-08 | 5,20E-07 | 10,2627082  |
| Ras and Rab interactor 3                                                      | 2,636462344 | 1,10E-08 | 5,23E-07 | 10,25421266 |
| F-box protein 32                                                              | 3,646796889 | 1,10E-08 | 5,24E-07 | 10,25103242 |
| cell division cycle associated 7 like                                         | 0,329697952 | 1,13E-08 | 5,33E-07 | 10,22980157 |
| H2.0-like homeobox                                                            | 0,261824709 | 1,18E-08 | 5,57E-07 | 10,18272851 |
| DEXH (Asp-Glu-X-His) box polypeptide 58                                       | 4,402993069 | 1,19E-08 | 5,60E-07 | 10,17477469 |
| leprecan-like 1                                                               | 0,314136371 | 1,21E-08 | 5,70E-07 | 10,15315125 |
| CKLF-like MARVEL transmembrane domain containing 3                            | 0,372583946 | 1,23E-08 | 5,79E-07 | 10,13447035 |
| RAS-like, estrogen-regulated, growth-inhibitor                                | 0,304613542 | 1,25E-08 | 5,82E-07 | 10,12350795 |
| CD81 antigen                                                                  | 3,098405165 | 1,25E-08 | 5,82E-07 | 10,12181054 |
| solute carrier family 1 (glial high affinity glutamate transporter), member 2 | 5,250070635 | 1,25E-08 | 5,82E-07 | 10,12134087 |
| chemokine (C-X-C motif) receptor 5                                            | 3,215705754 | 1,27E-08 | 5,90E-07 | 10,10549624 |
| sterol O-acyltransferase 1                                                    | 0,35569032  | 1,28E-08 | 5,92E-07 | 10,09954446 |
| potassium channel, subfamily K, member 13                                     | 0,331433512 | 1,30E-08 | 6,03E-07 | 10,0784922  |
| cytochrome P450, family 4, subfamily f, polypeptide 18                        | 0,187537911 | 1,32E-08 | 6,08E-07 | 10,06818261 |
| interferon gamma inducible protein 30                                         | 0,332129169 | 1,34E-08 | 6,15E-07 | 10,05323067 |
| FXRD domain-containing ion transport regulator 2                              | 0,335692183 | 1,44E-08 | 6,63E-07 | 9,973338594 |
| membrane-spanning 4-domains, subfamily A, member 6D                           | 3,232337368 | 1,48E-08 | 6,79E-07 | 9,946462848 |
| ChaC, cation transport regulator-like 1 (E. coli)                             | 2,9394604   | 1,49E-08 | 6,80E-07 | 9,942001234 |
| cDNA sequence BC006779                                                        | 2,768482559 | 1,51E-08 | 6,86E-07 | 9,92779808  |
| cytosolic thiouridylase subunit 1 homolog (S. pombe)                          | 3,119742158 | 1,51E-08 | 6,86E-07 | 9,927573607 |
| fibroblast growth factor receptor 2                                           | 3,600720432 | 1,52E-08 | 6,89E-07 | 9,921317864 |
| schlafen 2                                                                    | 3,52304977  | 1,53E-08 | 6,94E-07 | 9,91104816  |
| neural precursor cell expressed, developmentally down-regulated gene 9        | 2,805110009 | 1,56E-08 | 7,06E-07 | 9,89147053  |
| MAD homolog 3 (Drosophila)                                                    | 0,25756731  | 1,56E-08 | 7,06E-07 | 9,889808827 |
| mannosidase 2, alpha B1                                                       | 0,37797602  | 1,57E-08 | 7,07E-07 | 9,883702136 |
| interleukin-1 receptor-associated kinase 3                                    | 2,733756017 | 1,57E-08 | 7,07E-07 | 9,883620415 |
| microfibrillar-associated protein 3-like                                      | 3,252652875 | 1,59E-08 | 7,12E-07 | 9,873417801 |
| low density lipoprotein receptor-related protein 8, apolipoprotein e receptor | 3,278605479 | 1,63E-08 | 7,28E-07 | 9,848742753 |
| claudin 1                                                                     | 0,310649943 | 1,63E-08 | 7,29E-07 | 9,844794335 |
| apolipoprotein B mRNA editing enzyme, catalytic polypeptide 1                 | 0,361119931 | 1,67E-08 | 7,46E-07 | 9,818617484 |
| grancalcin                                                                    | 0,302813243 | 1,68E-08 | 7,47E-07 | 9,815056733 |
| synovial sarcoma, X breakpoint 2 interacting protein                          | 3,294035102 | 1,70E-08 | 7,54E-07 | 9,803216726 |
| colony stimulating factor 1 receptor                                          | 0,304247436 | 1,77E-08 | 7,83E-07 | 9,761226652 |
| topoisomerase (DNA) I                                                         | 3,008583896 | 1,80E-08 | 7,97E-07 | 9,740657304 |
| oncostatin M                                                                  | 3,399841724 | 1,82E-08 | 8,01E-07 | 9,733765828 |
| transmembrane protein 8 (five membrane-spanning domains)                      | 0,314356479 | 1,85E-08 | 8,13E-07 | 9,716201278 |
| fucosyltransferase 4                                                          | 0,375528893 | 1,88E-08 | 8,24E-07 | 9,699201707 |
| UDP-GlcNAc:betaGal beta-1,3-N-acetylglucosaminyltransferase 8                 | 0,333035374 | 1,88E-08 | 8,24E-07 | 9,695697347 |
| family with sequence similarity 78, member A                                  | 0,377010966 | 1,88E-08 | 8,24E-07 | 9,695219621 |
| orosomuroid 2                                                                 | 3,492048285 | 1,89E-08 | 8,25E-07 | 9,691107828 |
| glutamate-cysteine ligase, modifier subunit                                   | 0,308634087 | 1,90E-08 | 8,25E-07 | 9,689344512 |
| DEXH (Asp-Glu-X-His) box polypeptide 58                                       | 4,5251689   | 1,92E-08 | 8,35E-07 | 9,675269707 |
| transmembrane protein 178                                                     | 3,077883984 | 2,00E-08 | 8,65E-07 | 9,635642327 |
| myelin-associated glycoprotein                                                | 0,295308688 | 2,03E-08 | 8,75E-07 | 9,619982607 |
| macrophage receptor with collagenous structure                                | 4,750445989 | 2,03E-08 | 8,75E-07 | 9,619932096 |
| ADAMTS-like 5                                                                 | 0,279336361 | 2,03E-08 | 8,75E-07 | 9,617715243 |
| selenoprotein P, plasma, 1                                                    | 0,323266891 | 2,10E-08 | 9,03E-07 | 9,582324366 |
| interleukin 11 receptor, alpha chain 1                                        | 0,319496808 | 2,14E-08 | 9,17E-07 | 9,563499117 |
| cytochrome P450, family 27, subfamily a, polypeptide 1                        | 0,210412029 | 2,14E-08 | 9,17E-07 | 9,562282643 |
| gene rich cluster, C10 gene                                                   | 2,715645002 | 2,23E-08 | 9,53E-07 | 9,519758973 |
| CD97 antigen                                                                  | 0,185444045 | 2,24E-08 | 9,55E-07 | 9,515160201 |

|                                                                                                     |             |          |          |             |
|-----------------------------------------------------------------------------------------------------|-------------|----------|----------|-------------|
| nuclear protein 1                                                                                   | 2,775551982 | 2,27E-08 | 9,65E-07 | 9,500732484 |
| 2'-5' oligoadenylate synthetase-like 1<br>expressed sequence C77080                                 | 3,804852493 | 2,27E-08 | 9,65E-07 | 9,500218768 |
| Dnaj (Hsp40) homolog, subfamily C, member 15                                                        | 0,310827237 | 2,29E-08 | 9,71E-07 | 9,49150325  |
| pleckstrin 2                                                                                        | 0,346565464 | 2,32E-08 | 9,80E-07 | 9,480263973 |
| complement factor properdin                                                                         | 3,800675357 | 2,38E-08 | 1,00E-06 | 9,454454494 |
| transmembrane protein 86A                                                                           | 0,364959499 | 2,52E-08 | 1,06E-06 | 9,392733198 |
| cDNA sequence BC046404                                                                              | 0,414275784 | 2,61E-08 | 1,10E-06 | 9,354972352 |
| complement component 1, q subcomponent, alpha polypeptide                                           | 2,652696628 | 2,66E-08 | 1,11E-06 | 9,336617164 |
| G protein-coupled receptor 18                                                                       | 0,311070959 | 2,66E-08 | 1,11E-06 | 9,335500734 |
| haptoglobin                                                                                         | 3,021455126 | 2,67E-08 | 1,12E-06 | 9,332264702 |
| glycogenin                                                                                          | 3,053247892 | 2,68E-08 | 1,12E-06 | 9,327559424 |
| ST6 (alpha-N-acetyl-neuraminyl-2,3-beta-galactosyl-1,3)-N-acetylgalactosaminide alpha-2,6-sialyltrc | 0,399710277 | 2,70E-08 | 1,12E-06 | 9,320245505 |
| RIKEN cDNA 2010106G01 gene                                                                          | 0,374824613 | 2,70E-08 | 1,12E-06 | 9,319886978 |
| Dnaj (Hsp40) homolog, subfamily B, member 6                                                         | 2,829108813 | 2,76E-08 | 1,14E-06 | 9,298177924 |
| solute carrier family 4 (anion exchanger), member 8                                                 | 2,529762908 | 2,77E-08 | 1,15E-06 | 9,294037186 |
| argininosuccinate synthetase 1                                                                      | 0,336600365 | 2,80E-08 | 1,15E-06 | 9,285492895 |
| BCL2-like 11 (apoptosis facilitator)                                                                | 0,39694837  | 2,83E-08 | 1,16E-06 | 9,274190152 |
| cyclin-dependent kinase 5, regulatory subunit 1 (p35)                                               | 3,671938431 | 2,88E-08 | 1,19E-06 | 9,252884575 |
| olfactomedin 1                                                                                      | 2,650389785 | 2,89E-08 | 1,19E-06 | 9,250300988 |
| NAD(P)H dehydrogenase, quinone 2                                                                    | 0,385272989 | 2,94E-08 | 1,20E-06 | 9,233619664 |
| class II transactivator                                                                             | 0,399140898 | 2,94E-08 | 1,20E-06 | 9,231781284 |
| tetraspanin 14                                                                                      | 2,860476807 | 2,98E-08 | 1,22E-06 | 9,217955949 |
| G protein-coupled receptor 137B                                                                     | 0,362132085 | 2,99E-08 | 1,22E-06 | 9,21600715  |
| RAS protein activator like 3                                                                        | 0,301792277 | 3,04E-08 | 1,23E-06 | 9,198439831 |
| kinesin light chain 4                                                                               | 0,351641781 | 3,06E-08 | 1,24E-06 | 9,190230623 |
| interferon-induced protein with tetratricopeptide repeats 2                                         | 0,349182671 | 3,08E-08 | 1,24E-06 | 9,186231883 |
| fatty acid binding protein 3, muscle and heart                                                      | 3,0110904   | 3,08E-08 | 1,24E-06 | 9,185621934 |
| RAS guanyl releasing protein 1                                                                      | 4,111367443 | 3,12E-08 | 1,26E-06 | 9,169663956 |
| glycoprotein (transmembrane) nmb                                                                    | 2,442269067 | 3,13E-08 | 1,26E-06 | 9,167172351 |
| interferon induced transmembrane protein 2                                                          | 0,230179919 | 3,15E-08 | 1,26E-06 | 9,161899441 |
| leukemia inhibitory factor                                                                          | 2,680629354 | 3,16E-08 | 1,27E-06 | 9,156836169 |
| protein C receptor, endothelial                                                                     | 3,017691321 | 3,21E-08 | 1,28E-06 | 9,142126388 |
| pleckstrin homology domain containing, family O member 2                                            | 4,81022709  | 3,28E-08 | 1,31E-06 | 9,118580833 |
| stearoyl-Coenzyme A desaturase 1                                                                    | 0,330931045 | 3,32E-08 | 1,32E-06 | 9,16174525  |
| thrombospondin 1                                                                                    | 0,333065666 | 3,33E-08 | 1,32E-06 | 9,104822246 |
| nicotinamide N-methyltransferase                                                                    | 3,594033568 | 3,35E-08 | 1,33E-06 | 9,098090316 |
| suppression of tumorigenicity 5                                                                     | 0,327520812 | 3,37E-08 | 1,33E-06 | 9,092650684 |
| ornithine decarboxylase antizyme 2, pseudogene                                                      | 2,890421681 | 3,39E-08 | 1,34E-06 | 9,085014904 |
| calcium-binding protein p22-like                                                                    | 0,376810216 | 3,41E-08 | 1,34E-06 | 9,079219893 |
| pleckstrin homology domain containing, family M (with RUN domain) member 1                          | 3,316486481 | 3,44E-08 | 1,35E-06 | 9,068963759 |
| CD63 antigen                                                                                        | 0,404251186 | 3,48E-08 | 1,36E-06 | 9,059143534 |
| RIKEN cDNA 9030625A04 gene                                                                          | 0,413839315 | 3,48E-08 | 1,36E-06 | 9,057586003 |
| haptoglobin                                                                                         | 2,944056748 | 3,49E-08 | 1,37E-06 | 9,05404844  |
| synaptopodin                                                                                        | 3,346148576 | 3,54E-08 | 1,38E-06 | 9,039252288 |
| guanine nucleotide binding protein (G protein), gamma 4                                             | 0,373714856 | 3,55E-08 | 1,38E-06 | 9,036175903 |
| chondroitin sulfate N-acetylgalactosaminyltransferase 1                                             | 2,730080619 | 3,61E-08 | 1,41E-06 | 9,01878104  |
| cDNA sequence BC006779                                                                              | 4,057684385 | 3,66E-08 | 1,42E-06 | 9,004723574 |
| neuropilin 1                                                                                        | 2,646933922 | 3,75E-08 | 1,45E-06 | 8,978696312 |
| signal transducer and activator of transcription 5A                                                 | 0,209013319 | 3,76E-08 | 1,45E-06 | 8,976989663 |
| dual specificity phosphatase 1                                                                      | 3,081812055 | 3,78E-08 | 1,46E-06 | 8,970432059 |
| Wolfram syndrome 1 homolog (human)                                                                  | 2,464904265 | 3,79E-08 | 1,46E-06 | 8,970268127 |
| single-stranded DNA binding protein 3                                                               | 0,322990714 | 3,81E-08 | 1,46E-06 | 8,963998585 |
| acyl-CoA synthetase long-chain family member 1                                                      | 2,924169019 | 3,96E-08 | 1,52E-06 | 8,923398684 |
| solute carrier family 45, member 4                                                                  | 3,424686819 | 4,04E-08 | 1,55E-06 | 8,901395537 |
| legumin                                                                                             | 0,276241607 | 4,09E-08 | 1,56E-06 | 8,889830991 |
| lysozyme 1                                                                                          | 0,392671659 | 4,23E-08 | 1,62E-06 | 8,854740813 |
| transferrin receptor                                                                                | 0,323470945 | 4,45E-08 | 1,69E-06 | 8,802847233 |
| growth arrest and DNA-damage-inducible 45 alpha                                                     | 0,398433937 | 4,50E-08 | 1,71E-06 | 8,790673975 |
| lymphocyte antigen 9                                                                                | 0,268331834 | 4,52E-08 | 1,72E-06 | 8,785169567 |
| UDP-N-acetyl-alpha-D-galactosamine:polypeptide N-acetylgalactosaminyltransferase 10                 | 0,408493293 | 4,57E-08 | 1,73E-06 | 8,773814492 |
| RIKEN cDNA 9430038I01 gene                                                                          | 2,641829142 | 4,69E-08 | 1,77E-06 | 8,748185112 |
| nucleoredoxin                                                                                       | 0,378254339 | 4,69E-08 | 1,77E-06 | 8,747734068 |
| CD151 antigen                                                                                       | 0,37969293  | 4,70E-08 | 1,77E-06 | 8,74595659  |
| cytokine induced apoptosis inhibitor 1                                                              | 0,418648892 | 4,79E-08 | 1,80E-06 | 8,726150236 |
| cerebellin 1 precursor protein                                                                      | 2,750068818 | 4,81E-08 | 1,81E-06 | 8,719970354 |
| monoglyceride lipase                                                                                | 3,802023248 | 4,94E-08 | 1,85E-06 | 8,693111423 |
| low density lipoprotein-related protein 12                                                          | 0,233694396 | 4,96E-08 | 1,86E-06 | 8,688274836 |
| transducin-like enhancer of split 1, homolog of Drosophila E(spl)                                   | 0,365906608 | 5,05E-08 | 1,89E-06 | 8,669151757 |
| interferon-induced protein 35                                                                       | 3,299590393 | 5,06E-08 | 1,89E-06 | 8,66861365  |
| arginase type II                                                                                    | 2,608867062 | 5,09E-08 | 1,90E-06 | 8,661272404 |
| centromere protein A                                                                                | 2,692744099 | 5,11E-08 | 1,90E-06 | 8,65800117  |
| diacylglycerol kinase zeta                                                                          | 2,457204684 | 5,14E-08 | 1,91E-06 | 8,652100446 |
| interferon activated gene 205                                                                       | 0,370447683 | 5,21E-08 | 1,93E-06 | 8,638272736 |
| macrophage scavenger receptor 1                                                                     | 2,314472784 | 5,22E-08 | 1,93E-06 | 8,636255869 |
| 4HAUS augmin-like complex, subunit 8                                                                | 0,390592339 | 5,37E-08 | 1,98E-06 | 8,605927267 |
| chromatin modifying protein 5                                                                       | 0,356832521 | 5,39E-08 | 1,98E-06 | 8,602137111 |
| potassium channel tetramerisation domain containing 14                                              | 2,642343239 | 5,51E-08 | 2,02E-06 | 8,579850192 |
| neural precursor cell expressed, developmentally down-regulated gene 9                              | 5,381664073 | 5,53E-08 | 2,03E-06 | 8,576342525 |
| family with sequence similarity 63, member A                                                        | 3,242871923 | 5,64E-08 | 2,07E-06 | 8,554545764 |
| cDNA sequence BC016495                                                                              | 0,412389322 | 5,68E-08 | 2,08E-06 | 8,547751562 |
|                                                                                                     | 3,149646128 | 5,75E-08 | 2,10E-06 | 8,534501285 |

|                                                                                |             |          |          |             |
|--------------------------------------------------------------------------------|-------------|----------|----------|-------------|
| sortilin 1                                                                     | 0,393323982 | 5,82E-08 | 2,12E-06 | 8,522527273 |
| huntingtin interacting protein 1 related                                       | 2,485381455 | 5,84E-08 | 2,12E-06 | 8,518226123 |
| allograft inflammatory factor 1-like                                           | 0,368742342 | 5,85E-08 | 2,12E-06 | 8,516564241 |
| potassium channel tetramerisation domain containing 12                         | 0,405148665 | 5,89E-08 | 2,13E-06 | 8,509611388 |
| 5'-nucleotidase domain containing 2                                            | 0,380332363 | 5,98E-08 | 2,16E-06 | 8,494158793 |
| haptoglobin                                                                    | 3,503371877 | 6,03E-08 | 2,18E-06 | 8,48582256  |
| tumor necrosis factor receptor superfamily, member 12a                         | 0,404960206 | 6,04E-08 | 2,18E-06 | 8,484236498 |
| signal transducer and activator of transcription 1                             | 2,729751925 | 6,07E-08 | 2,18E-06 | 8,478308173 |
| MICAL-like 2                                                                   | 3,003854596 | 6,08E-08 | 2,18E-06 | 8,476921852 |
| lysozyme 2                                                                     | 0,393489975 | 6,08E-08 | 2,18E-06 | 8,476205948 |
| ubiquitin-conjugating enzyme E2 Q2-like                                        | 0,421946676 | 6,09E-08 | 2,18E-06 | 8,475424835 |
| CD40 antigen                                                                   | 3,653604163 | 6,45E-08 | 2,30E-06 | 8,415901876 |
| RIKEN cDNA 1110012D08 gene                                                     | 3,084881632 | 6,48E-08 | 2,31E-06 | 8,410236227 |
| ladinin                                                                        | 3,09909273  | 6,54E-08 | 2,33E-06 | 8,401038499 |
| ecotropic viral integration site 2a                                            | 0,348390868 | 6,57E-08 | 2,34E-06 | 8,395960198 |
| FBJ osteosarcoma oncogene                                                      | 0,311415059 | 6,65E-08 | 2,36E-06 | 8,383524467 |
| TBC1 domain family, member 2                                                   | 0,345003582 | 6,67E-08 | 2,36E-06 | 8,380593163 |
| non-metastatic cells 3, protein expressed in                                   | 0,397531929 | 6,74E-08 | 2,38E-06 | 8,369601238 |
| CD300 molecule-like family member d                                            | 0,297089478 | 6,74E-08 | 2,38E-06 | 8,368992738 |
| kinesin family member 5C                                                       | 4,231838989 | 6,75E-08 | 2,38E-06 | 8,367629739 |
| formyl peptide receptor 1                                                      | 3,589761236 | 6,82E-08 | 2,40E-06 | 8,356462963 |
| signal transducer and activator of transcription 1                             | 2,627850772 | 6,99E-08 | 2,46E-06 | 8,331023099 |
| reticulon 1                                                                    | 3,581984012 | 7,26E-08 | 2,55E-06 | 8,291910442 |
| tetratricopeptide repeat domain 39C                                            | 2,508029302 | 7,31E-08 | 2,56E-06 | 8,285264959 |
| MICAL-like 2                                                                   | 2,974160951 | 7,38E-08 | 2,58E-06 | 8,274637335 |
| family with sequence similarity 169, member B                                  | 4,2204283   | 7,56E-08 | 2,64E-06 | 8,250127501 |
| asparagine synthetase                                                          | 2,616495758 | 7,59E-08 | 2,64E-06 | 8,245033708 |
| NEDD4 binding protein 2-like 1                                                 | 0,416246351 | 7,63E-08 | 2,65E-06 | 8,240327187 |
| glycine C-acetyltransferase (2-amino-3-ketobutyrate-coenzyme A ligase)         | 0,30249285  | 7,73E-08 | 2,68E-06 | 8,226472463 |
| RIKEN cDNA B930041F14 gene                                                     | 0,384568642 | 7,73E-08 | 2,68E-06 | 8,226399556 |
| G1 to S phase transition 2                                                     | 0,366718603 | 7,88E-08 | 2,73E-06 | 8,206326437 |
| phosphatidylinositol 3 kinase, regulatory subunit, polypeptide 3 (p55)         | 0,408017743 | 8,00E-08 | 2,76E-06 | 8,191021323 |
| collagen, type IV, alpha 2                                                     | 5,792225696 | 8,04E-08 | 2,77E-06 | 8,186057603 |
| prostaglandin E synthase                                                       | 4,149215877 | 8,08E-08 | 2,78E-06 | 8,18088383  |
| solute carrier family 48 (heme transporter), member 1                          | 0,405084799 | 8,15E-08 | 2,80E-06 | 8,171062178 |
| SH3 domain binding glutamic acid-rich protein like 2                           | 2,550208166 | 8,24E-08 | 2,83E-06 | 8,160408029 |
| claudin 10                                                                     | 0,40381738  | 8,33E-08 | 2,85E-06 | 8,149257288 |
| kallikrein 1-related peptidase b11                                             | 0,419589217 | 8,36E-08 | 2,86E-06 | 8,144997809 |
| CD180 antigen                                                                  | 0,291705771 | 8,40E-08 | 2,87E-06 | 8,139997799 |
| interferon gamma inducible protein 30                                          | 0,406215025 | 8,55E-08 | 2,91E-06 | 8,12134743  |
| cDNA sequence BC028528                                                         | 0,417261123 | 8,65E-08 | 2,94E-06 | 8,109831389 |
| FYVE, RhoGEF and PH domain containing 6                                        | 0,410745616 | 9,04E-08 | 3,07E-06 | 8,063801732 |
| mcf.2 transforming sequence-like                                               | 0,356217756 | 9,28E-08 | 3,15E-06 | 8,03627416  |
| growth factor receptor bound protein 2-associated protein 3                    | 0,373295435 | 9,38E-08 | 3,17E-06 | 8,025063518 |
| sortilin 1                                                                     | 0,387079757 | 9,50E-08 | 3,21E-06 | 8,011948147 |
| tensin 3                                                                       | 0,42509213  | 9,63E-08 | 3,25E-06 | 7,998064945 |
| dual specificity phosphatase 16                                                | 2,291898491 | 9,64E-08 | 3,25E-06 | 7,996167495 |
| microfibrillar-associated protein 3-like                                       | 3,683763738 | 9,73E-08 | 3,27E-06 | 7,986699172 |
| solute carrier family 39 (metal ion transporter), member 11                    | 0,422479533 | 9,73E-08 | 3,27E-06 | 7,986628138 |
| superoxide dismutase 2, mitochondrial                                          | 2,55279025  | 9,75E-08 | 3,27E-06 | 7,984147202 |
| solute carrier family 19 (sodium/hydrogen exchanger), member 1                 | 0,407212818 | 9,88E-08 | 3,30E-06 | 7,971318698 |
| toll-like receptor 4                                                           | 0,3761412   | 9,92E-08 | 3,31E-06 | 7,966308458 |
| RIKEN cDNA 9130014G24 gene                                                     | 2,774350716 | 9,96E-08 | 3,32E-06 | 7,962538976 |
| solute carrier organic anion transporter family, member 2b1                    | 0,350268182 | 9,96E-08 | 3,32E-06 | 7,962196987 |
| special AT-rich sequence binding protein 1                                     | 2,971191019 | 9,98E-08 | 3,32E-06 | 7,960514327 |
| G protein-coupled receptor 155                                                 | 0,412841622 | 1,01E-07 | 3,34E-06 | 7,952059207 |
| formin-like 2                                                                  | 0,435808425 | 1,01E-07 | 3,35E-06 | 7,945920916 |
| RIKEN cDNA 1500003O03 gene                                                     | 2,68750847  | 1,02E-07 | 3,38E-06 | 7,9365098   |
| CDC42 effector protein (Rho GTPase binding) 2                                  | 2,405157979 | 1,03E-07 | 3,39E-06 | 7,931135956 |
| 5'-nucleotidase, cytosolic III                                                 | 2,413035758 | 1,04E-07 | 3,42E-06 | 7,921062011 |
| thiosulfate sulfurtransferase, mitochondrial                                   | 0,339930471 | 1,04E-07 | 3,43E-06 | 7,914514652 |
| galactose-3-O-sulfotransferase 1                                               | 2,581739025 | 1,05E-07 | 3,45E-06 | 7,90783439  |
| tropomodulin 2                                                                 | 0,369411628 | 1,06E-07 | 3,47E-06 | 7,900478968 |
| Kruppel-like factor 5                                                          | 2,961684317 | 1,06E-07 | 3,49E-06 | 7,893855096 |
| adenosine A2b receptor                                                         | 2,58205945  | 1,07E-07 | 3,50E-06 | 7,886099468 |
| adenylate kinase 8                                                             | 0,33621133  | 1,07E-07 | 3,50E-06 | 7,885012611 |
| solute carrier family 29 (nucleoside transporters), member 3                   | 0,406209463 | 1,09E-07 | 3,54E-06 | 7,872415117 |
| Rap guanine nucleotide exchange factor (GEF) 5                                 | 2,984349897 | 1,09E-07 | 3,55E-06 | 7,86796343  |
| heat shock protein 90, alpha (cytosolic), class A member 1                     | 2,750809976 | 1,11E-07 | 3,59E-06 | 7,853956302 |
| RIKEN cDNA 1500003O03 gene                                                     | 2,848159262 | 1,13E-07 | 3,66E-06 | 7,832047802 |
| prune homolog 2 (Drosophila)                                                   | 0,368133627 | 1,14E-07 | 3,68E-06 | 7,826173026 |
| immunity-related GTPase family M member 2                                      | 2,665953419 | 1,16E-07 | 3,75E-06 | 7,804319454 |
| amylo-1,6-glucosidase, 4-alpha-glucanotransferase                              | 0,406624157 | 1,16E-07 | 3,75E-06 | 7,801688091 |
| testis derived transcript                                                      | 2,67812087  | 1,17E-07 | 3,76E-06 | 7,798470043 |
| uridine-cytidine kinase 2                                                      | 2,365424775 | 1,17E-07 | 3,76E-06 | 7,795971675 |
| ArfGAP with RhoGAP domain, ankyrin repeat and PH domain 3                      | 0,320362678 | 1,19E-07 | 3,83E-06 | 7,774358143 |
| carnitine acetyltransferase                                                    | 0,418660084 | 1,20E-07 | 3,84E-06 | 7,77180313  |
| solute carrier family 7 (cationic amino acid transporter, y+ system), member 2 | 3,087719209 | 1,22E-07 | 3,92E-06 | 7,747188342 |
| tribbles homolog 3 (Drosophila)                                                | 2,901693052 | 1,23E-07 | 3,94E-06 | 7,741361993 |
| lymphocyte antigen 6 complex, locus A                                          | 3,250769509 | 1,25E-07 | 4,00E-06 | 7,723703676 |
| D site albumin promoter binding protein                                        | 0,297653842 | 1,27E-07 | 4,04E-06 | 7,712283453 |

|                                                                                                         |             |          |          |             |
|---------------------------------------------------------------------------------------------------------|-------------|----------|----------|-------------|
| acetyl-Coenzyme A acyltransferase 2 (mitochondrial 3-oxoacyl-Coenzyme A thiolase)                       | 0,332519683 | 1,29E-07 | 4,11E-06 | 7,691415695 |
| dipeptidase 2                                                                                           | 0,339068877 | 1,29E-07 | 4,11E-06 | 7,690226624 |
| suppression of tumorigenicity 5                                                                         | 2,511850097 | 1,31E-07 | 4,17E-06 | 7,672950663 |
| RIKEN cDNA 9930111J21 gene 1                                                                            | 0,316610383 | 1,32E-07 | 4,20E-06 | 7,665528224 |
| Dnaj (Hsp40) homolog, subfamily B, member 6                                                             | 2,173068307 | 1,33E-07 | 4,22E-06 | 7,657803836 |
| synaptotagmin VII                                                                                       | 3,254218699 | 1,34E-07 | 4,23E-06 | 7,654674318 |
| prosaposin                                                                                              | 0,444812854 | 1,35E-07 | 4,25E-06 | 7,648454787 |
| RIKEN cDNA 2810025M15 gene                                                                              | 0,391464051 | 1,35E-07 | 4,27E-06 | 7,642181048 |
| c-mer proto-oncogene tyrosine kinase                                                                    | 0,243066606 | 1,36E-07 | 4,28E-06 | 7,637776386 |
| granulin                                                                                                | 0,443681569 | 1,37E-07 | 4,30E-06 | 7,63166253  |
| ankyrin repeat and SOCS box-containing 2                                                                | 0,36648829  | 1,38E-07 | 4,32E-06 | 7,625382213 |
| ectonucleotide pyrophosphatase/phosphodiesterase 2                                                      | 3,854335228 | 1,40E-07 | 4,39E-06 | 7,605977309 |
| toll-like receptor 7                                                                                    | 0,238318746 | 1,41E-07 | 4,40E-06 | 7,60266399  |
| dual specificity phosphatase 16                                                                         | 2,866014546 | 1,44E-07 | 4,48E-06 | 7,580344904 |
| nuclear factor of kappa light polypeptide gene enhancer in B-cells inhibitor, epsilon                   | 2,438705117 | 1,44E-07 | 4,48E-06 | 7,580149716 |
| SEC14 and spectrin domains 1                                                                            | 2,183907774 | 1,44E-07 | 4,50E-06 | 7,574394909 |
| uridine-cytidine kinase 2                                                                               | 2,443410504 | 1,46E-07 | 4,53E-06 | 7,565000808 |
| solute carrier family 15, member 3                                                                      | 2,926922978 | 1,49E-07 | 4,64E-06 | 7,539189335 |
| ERO1-like beta (S. cerevisiae)                                                                          | 0,347631488 | 1,50E-07 | 4,66E-06 | 7,53314036  |
| poly(rC) binding protein 4                                                                              | 2,322476942 | 1,51E-07 | 4,66E-06 | 7,529871311 |
| serine incorporator 3                                                                                   | 0,45553358  | 1,51E-07 | 4,66E-06 | 7,529476158 |
| PQ loop repeat containing 1                                                                             | 0,417545962 | 1,52E-07 | 4,68E-06 | 7,522750296 |
| neuritin 1-like                                                                                         | 3,089462594 | 1,53E-07 | 4,70E-06 | 7,516376494 |
| tetratricopeptide repeat domain 3                                                                       | 0,442582775 | 1,54E-07 | 4,74E-06 | 7,506734572 |
| enhancer trap locus 4                                                                                   | 0,392984872 | 1,56E-07 | 4,79E-06 | 7,492534327 |
| GM2 ganglioside activator protein                                                                       | 0,351692608 | 1,56E-07 | 4,79E-06 | 7,492381636 |
| unc-93 homolog B1 (C. elegans)                                                                          | 0,420220622 | 1,57E-07 | 4,80E-06 | 7,489011794 |
| transferrin receptor                                                                                    | 0,414660655 | 1,59E-07 | 4,86E-06 | 7,472916384 |
| RIKEN cDNA 9030425E11 gene                                                                              | 3,861862336 | 1,59E-07 | 4,86E-06 | 7,472293647 |
| zinc finger, MYM-type 3                                                                                 | 2,740041581 | 1,60E-07 | 4,87E-06 | 7,468704144 |
| interferon gamma induced GTPase                                                                         | 3,372499736 | 1,65E-07 | 5,02E-06 | 7,435108285 |
| nudix (nucleoside diphosphate linked moiety X)-type motif 19                                            | 0,424362183 | 1,65E-07 | 5,02E-06 | 7,434796571 |
| patatin-like phospholipase domain containing 7                                                          | 0,379435817 | 1,65E-07 | 5,02E-06 | 7,432839914 |
| kallikrein 1-related peptidase b1                                                                       | 0,379247543 | 1,66E-07 | 5,03E-06 | 7,428707003 |
| PDZ and LIM domain 7                                                                                    | 2,379224109 | 1,66E-07 | 5,03E-06 | 7,427945694 |
| latent transforming growth factor beta binding protein 3                                                | 0,324339923 | 1,68E-07 | 5,06E-06 | 7,420063949 |
| sema domain, immunoglobulin domain (Ig), TM domain, and short cytoplasmic domain                        | 3,500417125 | 1,68E-07 | 5,06E-06 | 7,417210234 |
| Musashi homolog 2 (Drosophila)                                                                          | 2,556529384 | 1,68E-07 | 5,06E-06 | 7,416395922 |
| calcium and integrin binding family member 3                                                            | 0,377579001 | 1,69E-07 | 5,09E-06 | 7,409188066 |
| phosphatidic acid phosphatase type 2C                                                                   | 0,447989594 | 1,72E-07 | 5,17E-06 | 7,391712693 |
| unc-93 homolog B1 (C. elegans)                                                                          | 0,410910772 | 1,72E-07 | 5,17E-06 | 7,390014369 |
| 2'-5' oligoadenylate synthetase-like 2                                                                  | 5,944867229 | 1,76E-07 | 5,26E-06 | 7,369936548 |
| KDM1 lysine (K)-specific demethylase 6B                                                                 | 3,072590577 | 1,76E-07 | 5,26E-06 | 7,368208479 |
| protein kinase, cAMP dependent regulatory, type II beta                                                 | 2,562783825 | 1,76E-07 | 5,27E-06 | 7,365983337 |
| GRIP1 associated protein 1                                                                              | 0,426952269 | 1,79E-07 | 5,34E-06 | 7,350640127 |
| actin, alpha 2, smooth muscle, aorta                                                                    | 0,214264524 | 1,80E-07 | 5,34E-06 | 7,346947907 |
| FYVE, RhoGEF and PH domain containing 6                                                                 | 0,405251091 | 1,80E-07 | 5,34E-06 | 7,346605688 |
| lysine (K)-specific demethylase 4A                                                                      | 2,661342777 | 1,81E-07 | 5,38E-06 | 7,338558086 |
| colony stimulating factor 2 receptor, alpha, low-affinity (granulocyte-macrophage)                      | 0,420728798 | 1,84E-07 | 5,46E-06 | 7,321492507 |
| lysophosphatidic acid receptor 3                                                                        | 0,414262903 | 1,85E-07 | 5,47E-06 | 7,317412786 |
| fibrosin-like 1                                                                                         | 0,455733099 | 1,85E-07 | 5,47E-06 | 7,315713067 |
| opioid growth factor receptor                                                                           | 2,298935091 | 1,86E-07 | 5,48E-06 | 7,313161705 |
| transmembrane protein 41a                                                                               | 0,342716004 | 1,87E-07 | 5,52E-06 | 7,304478965 |
| RIKEN cDNA 4632428N05 gene                                                                              | 0,394808554 | 1,91E-07 | 5,62E-06 | 7,283451693 |
| fatty acid desaturase 1                                                                                 | 0,445443671 | 1,98E-07 | 5,81E-06 | 7,246442332 |
| diacylglycerol kinase zeta                                                                              | 0,388124349 | 1,99E-07 | 5,82E-06 | 7,242065055 |
| small proline-rich protein 2D                                                                           | 3,260298569 | 1,99E-07 | 5,82E-06 | 7,241654114 |
| pyrimidineric receptor P2Y, G-protein coupled, 6                                                        | 0,418194377 | 2,03E-07 | 5,93E-06 | 7,22165374  |
| transmembrane protein 82                                                                                | 0,379194644 | 2,05E-07 | 6,00E-06 | 7,206930243 |
| whirlin                                                                                                 | 2,474309151 | 2,11E-07 | 6,17E-06 | 7,177298163 |
| ankyrin repeat domain 37                                                                                | 5,350765819 | 2,13E-07 | 6,20E-06 | 7,170104219 |
| killer cell lectin-like receptor family I member 1                                                      | 2,958929774 | 2,14E-07 | 6,22E-06 | 7,165205211 |
| NAD(P)H dehydrogenase, quinone 2                                                                        | 0,416594981 | 2,19E-07 | 6,36E-06 | 7,141037318 |
| uridine-cytidine kinase 2                                                                               | 2,456091655 | 2,20E-07 | 6,37E-06 | 7,137650489 |
| transgelin 2                                                                                            | 2,27662896  | 2,20E-07 | 6,38E-06 | 7,134675635 |
| protein tyrosine phosphatase, receptor type, f polypeptide (PTPRF), interacting protein (liprin), alpha | 4,31285625  | 2,23E-07 | 6,46E-06 | 7,120050186 |
| aminolevulinic acid synthase 1                                                                          | 0,471827039 | 2,25E-07 | 6,50E-06 | 7,112805216 |
| solute carrier family 25 (mitochondrial carrier, dicarboxylate transporter), member 10                  | 0,370678567 | 2,25E-07 | 6,50E-06 | 7,110483993 |
| Gem-interacting protein                                                                                 | 0,402740195 | 2,27E-07 | 6,54E-06 | 7,102552315 |
| tensin 1                                                                                                | 0,374918613 | 2,28E-07 | 6,57E-06 | 7,096320951 |
| serglycin                                                                                               | 4,548029947 | 2,29E-07 | 6,59E-06 | 7,092902056 |
| cytidine monophosphate (UMP-CMP) kinase 2, mitochondrial                                                | 2,651005109 | 2,30E-07 | 6,59E-06 | 7,090205518 |
| tubulin, beta 6                                                                                         | 2,13333018  | 2,34E-07 | 6,71E-06 | 7,070473433 |
| sorting nexin 18                                                                                        | 2,224381363 | 2,36E-07 | 6,77E-06 | 7,060335956 |
| mitogen-activated protein kinase kinase 1                                                               | 3,984515075 | 2,38E-07 | 6,80E-06 | 7,052548907 |
| cDNA sequence AB124611                                                                                  | 0,27361553  | 2,39E-07 | 6,80E-06 | 7,050382799 |
| glutathione peroxidase 3                                                                                | 0,346332017 | 2,39E-07 | 6,80E-06 | 7,050059482 |
| predicted gene 7120                                                                                     | 0,419387738 | 2,44E-07 | 6,95E-06 | 7,026702892 |
| acetyl-Coenzyme A carboxylase alpha                                                                     | 0,443851672 | 2,45E-07 | 6,97E-06 | 7,022163167 |
| folistatin-like 1                                                                                       | 2,481360254 | 2,47E-07 | 7,01E-06 | 7,014199991 |
| START domain containing 7                                                                               | 0,463179847 | 2,47E-07 | 7,01E-06 | 7,013592351 |

|                                                                                                         |             |          |          |             |
|---------------------------------------------------------------------------------------------------------|-------------|----------|----------|-------------|
| oligonucleotide/oligosaccharide-binding fold containing 2A                                              | 0,451047704 | 2,48E-07 | 7,01E-06 | 7,011920988 |
| ketohexokinase                                                                                          | 0,426405126 | 2,51E-07 | 7,08E-06 | 6,99951594  |
| lamin A                                                                                                 | 0,411612144 | 2,53E-07 | 7,14E-06 | 6,989164262 |
| a disintegrin and metallopeptidase domain 15 (metargidin)                                               | 0,449446977 | 2,68E-07 | 7,54E-06 | 6,931397508 |
| osteoclast stimulating factor 1                                                                         | 2,115098958 | 2,73E-07 | 7,69E-06 | 6,909459988 |
| tumor necrosis factor, alpha-induced protein 8-like 2                                                   | 0,434387855 | 2,76E-07 | 7,76E-06 | 6,899098909 |
| hemolytic complement                                                                                    | 2,758736534 | 2,77E-07 | 7,78E-06 | 6,894337302 |
| Sad1 and UNC84 domain containing 2                                                                      | 0,441230584 | 2,78E-07 | 7,78E-06 | 6,893033467 |
| family with sequence similarity 98, member C                                                            | 0,4632408   | 2,78E-07 | 7,79E-06 | 6,88967306  |
| RIKEN cDNA 2510009E07 gene                                                                              | 0,334735612 | 2,79E-07 | 7,79E-06 | 6,888376499 |
| Fc receptor-like 5, scavenger receptor                                                                  | 0,410712764 | 2,81E-07 | 7,84E-06 | 6,881228753 |
| acidic (leucine-rich) nuclear phosphoprotein 32 family, member A                                        | 2,374747389 | 2,83E-07 | 7,89E-06 | 6,873182793 |
| HtrA serine peptidase 4                                                                                 | 2,696104081 | 2,85E-07 | 7,93E-06 | 6,866389257 |
| castor homolog 1, zinc finger (Drosophila)                                                              | 3,46847645  | 2,91E-07 | 8,10E-06 | 6,841989187 |
| SH3 and cysteine rich domain 2                                                                          | 0,412142705 | 2,95E-07 | 8,19E-06 | 6,829861288 |
| two pore channel 1                                                                                      | 0,322521443 | 2,98E-07 | 8,27E-06 | 6,818164074 |
| Mediterranean fever                                                                                     | 2,187069837 | 3,01E-07 | 8,34E-06 | 6,807396707 |
| leukocyte-associated Ig-like receptor 1                                                                 | 0,399332081 | 3,04E-07 | 8,40E-06 | 6,78572112  |
| Ras-related GTP binding D                                                                               | 0,365364963 | 3,06E-07 | 8,45E-06 | 6,790740865 |
| interleukin 15 receptor, alpha chain                                                                    | 2,133030681 | 3,12E-07 | 8,61E-06 | 6,770678181 |
| Rap guanine nucleotide exchange factor (GEF) 2                                                          | 2,437236069 | 3,13E-07 | 8,62E-06 | 6,767813851 |
| sorting nexin 24                                                                                        | 0,351545075 | 3,16E-07 | 8,68E-06 | 6,758673639 |
| ADAMTS-like 5                                                                                           | 0,455818729 | 3,17E-07 | 8,72E-06 | 6,752864364 |
| solute carrier family 7 (cationic amino acid transporter, y+ system), member 5                          | 2,577466347 | 3,18E-07 | 8,73E-06 | 6,750575626 |
| acyl-Coenzyme A dehydrogenase, medium chain                                                             | 2,109398912 | 3,21E-07 | 8,79E-06 | 6,741959446 |
| tec protein tyrosine kinase                                                                             | 0,369728418 | 3,26E-07 | 8,91E-06 | 6,724819096 |
| protein phosphatase 1, catalytic subunit, beta isoform                                                  | 2,219237525 | 3,26E-07 | 8,91E-06 | 6,724490937 |
| membrane protein, palmitoylated                                                                         | 0,430002394 | 3,27E-07 | 8,93E-06 | 6,721203289 |
| synaptophysin-like protein                                                                              | 0,441200134 | 3,31E-07 | 9,03E-06 | 6,707964957 |
| xenotropic and polytropic retrovirus receptor 1                                                         | 0,466583916 | 3,38E-07 | 9,18E-06 | 6,688819036 |
| phospholipid scramblase 4                                                                               | 0,375102477 | 3,45E-07 | 9,39E-06 | 6,66478777  |
| colony stimulating factor 1 receptor                                                                    | 0,387610482 | 3,47E-07 | 9,41E-06 | 6,660713278 |
| lipoma HMGIC fusion partner-like 2                                                                      | 0,367124222 | 3,52E-07 | 9,53E-06 | 6,645946054 |
| protein phosphatase 1, regulatory (inhibitor) subunit 1A                                                | 0,249409494 | 3,54E-07 | 9,57E-06 | 6,640249437 |
| G protein-coupled receptor 137B, pseudogene                                                             | 0,452721336 | 3,60E-07 | 9,73E-06 | 6,621920349 |
| phosphoprotein enriched in astrocytes 15A                                                               | 0,460961663 | 3,64E-07 | 9,82E-06 | 6,610907656 |
| myosin VIIA                                                                                             | 0,321462798 | 3,65E-07 | 9,83E-06 | 6,608280685 |
| nuclear receptor subfamily 4, group A, member 2                                                         | 2,451955992 | 3,66E-07 | 9,86E-06 | 6,603684219 |
| claudin 10                                                                                              | 0,386471283 | 3,67E-07 | 9,88E-06 | 6,600499592 |
| prostaglandin I receptor (IP)                                                                           | 0,323821706 | 3,76E-07 | 1,01E-05 | 6,57728207  |
| nitric oxide synthase 2, inducible                                                                      | 2,369779341 | 3,76E-07 | 1,01E-05 | 6,575788107 |
| single stranded DNA binding protein 4                                                                   | 0,416553235 | 3,77E-07 | 1,01E-05 | 6,573148048 |
| a disintegrin and metallopeptidase domain 8                                                             | 0,455924115 | 3,78E-07 | 1,01E-05 | 6,570385781 |
| phosphodiesterase 4D interacting protein (myomegalin)                                                   | 0,417914478 | 3,79E-07 | 1,01E-05 | 6,569118748 |
| glutathione S-transferase, theta 1                                                                      | 2,890544596 | 3,80E-07 | 1,01E-05 | 6,564921309 |
| ceramide kinase                                                                                         | 0,476941262 | 3,80E-07 | 1,01E-05 | 6,563815916 |
| megakaryocyte-associated tyrosine kinase                                                                | 0,31070866  | 3,83E-07 | 1,02E-05 | 6,556602286 |
| H2A histone family, member Y                                                                            | 2,040451425 | 3,87E-07 | 1,03E-05 | 6,545753192 |
| promyelocytic leukemia                                                                                  | 2,702011785 | 3,90E-07 | 1,03E-05 | 6,538731409 |
| glycoprotein (transmembrane) nmb                                                                        | 0,362306694 | 3,92E-07 | 1,04E-05 | 6,532409139 |
| FK506 binding protein 1a                                                                                | 2,114334883 | 3,97E-07 | 1,05E-05 | 6,520335444 |
| solute carrier family 29 (nucleoside transporters), member 1                                            | 0,299420972 | 3,97E-07 | 1,05E-05 | 6,51945939  |
| CD63 antigen                                                                                            | 0,444461694 | 3,98E-07 | 1,05E-05 | 6,517694472 |
| WD repeat domain 86                                                                                     | 0,284929228 | 4,01E-07 | 1,06E-05 | 6,510050874 |
| RIKEN cDNA 5430435G22 gene                                                                              | 0,401868539 | 4,08E-07 | 1,07E-05 | 6,491420066 |
| microsomal glutathione S-transferase 1                                                                  | 0,425034476 | 4,14E-07 | 1,09E-05 | 6,474775556 |
| adrenergic receptor, alpha 2a                                                                           | 2,622988659 | 4,23E-07 | 1,11E-05 | 6,453967195 |
| IKAROS family zinc finger 4                                                                             | 2,819106791 | 4,23E-07 | 1,11E-05 | 6,453372741 |
| prosaposin                                                                                              | 0,431123006 | 4,35E-07 | 1,14E-05 | 6,4243364   |
| splA/ryanodine receptor domain and SOCS box containing 4                                                | 0,411461494 | 4,36E-07 | 1,14E-05 | 6,422013485 |
| neuron navigator 1                                                                                      | 0,486922052 | 4,36E-07 | 1,14E-05 | 6,420364924 |
| cyclin-dependent kinase inhibitor 2C (p18, inhibits CDK4)                                               | 0,391820061 | 4,39E-07 | 1,14E-05 | 6,414714388 |
| immunity-related GTPase family M member 1                                                               | 2,951674557 | 4,39E-07 | 1,14E-05 | 6,41439126  |
| Gem-interacting protein                                                                                 | 0,490834306 | 4,42E-07 | 1,15E-05 | 6,406707448 |
| protein tyrosine phosphatase, receptor type, f polypeptide (PTPRF), interacting protein (liprin), alpha | 2,586111799 | 4,44E-07 | 1,15E-05 | 6,402229474 |
| killer cell lectin-like receptor subfamily B member 1B                                                  | 2,376074507 | 4,52E-07 | 1,17E-05 | 6,383458797 |
| tetratricopeptide repeat domain 3                                                                       | 0,489168151 | 4,58E-07 | 1,19E-05 | 6,370439161 |
| RIKEN cDNA 4833442J19 gene                                                                              | 2,089481143 | 4,59E-07 | 1,19E-05 | 6,368237007 |
| mucosa associated lymphoid tissue lymphoma translocation gene 1                                         | 2,436753955 | 4,66E-07 | 1,20E-05 | 6,353032068 |
| cytochrome P450, family 4, subfamily f, polypeptide 18                                                  | 0,309128735 | 4,71E-07 | 1,22E-05 | 6,340654128 |
| hydroxysteroid (17-beta) dehydrogenase 4                                                                | 0,488372281 | 4,74E-07 | 1,22E-05 | 6,333626611 |
| integrin alpha FG-GAP repeat containing 3                                                               | 0,464711694 | 4,78E-07 | 1,23E-05 | 6,326436986 |
| secreted phosphoprotein 1                                                                               | 0,39253897  | 4,78E-07 | 1,23E-05 | 6,32441733  |
| RIKEN cDNA 2310035K24 gene                                                                              | 0,445729865 | 4,79E-07 | 1,23E-05 | 6,323268742 |
| RIKEN cDNA 2510009E07 gene                                                                              | 0,36924981  | 4,80E-07 | 1,23E-05 | 6,320209119 |
| poly (ADP-ribose) polymerase family, member 14                                                          | 2,201131893 | 4,81E-07 | 1,23E-05 | 6,319353748 |
| carbonyl reductase 3                                                                                    | 0,33052163  | 4,85E-07 | 1,24E-05 | 6,31178843  |
| syndecan binding protein (syntenin) 2                                                                   | 2,33453539  | 4,93E-07 | 1,26E-05 | 6,292224486 |
| cathepsin L                                                                                             | 0,41379279  | 5,02E-07 | 1,28E-05 | 6,274002178 |
| myosin VA                                                                                               | 0,427207408 | 5,05E-07 | 1,29E-05 | 6,268046409 |
| calcium and integrin binding 1 (calmyrin)                                                               | 2,171542679 | 5,08E-07 | 1,30E-05 | 6,261330344 |



|                                                                                                |             |          |          |             |
|------------------------------------------------------------------------------------------------|-------------|----------|----------|-------------|
| phospholipase D family, member 3                                                               | 0,343180169 | 5,11E-07 | 1,30E-05 | 6,255648592 |
| disabled homolog 2 (Drosophila)                                                                | 2,604700188 | 5,11E-07 | 1,30E-05 | 6,255591193 |
| a disintegrin and metalloproteinase domain 23                                                  | 0,281927023 | 5,12E-07 | 1,30E-05 | 6,25353132  |
| signaling lymphocytic activation molecule family member 1                                      | 2,076205366 | 5,17E-07 | 1,31E-05 | 6,244116927 |
| ribosomal protein L3-like                                                                      | 0,399944549 | 5,22E-07 | 1,32E-05 | 6,234000096 |
| histocompatibility 2, T region locus 22                                                        | 2,221496987 | 5,25E-07 | 1,33E-05 | 6,227279082 |
| peptidylprolyl isomerase C                                                                     | 0,389803773 | 5,32E-07 | 1,34E-05 | 6,214348827 |
| spermatid perinuclear RNA binding protein                                                      | 0,453192524 | 5,33E-07 | 1,34E-05 | 6,212132523 |
| small EDRK-rich factor 1                                                                       | 2,236702218 | 5,41E-07 | 1,36E-05 | 6,196756827 |
| a disintegrin-like and metalloproteinase (reprolysin type) with thrombospondin type 1 motif, 9 | 2,536458053 | 5,43E-07 | 1,37E-05 | 6,191812069 |
| ST3 beta-galactoside alpha-2,3-sialyltransferase 1                                             | 2,390609356 | 5,45E-07 | 1,37E-05 | 6,189228294 |
| ADP-ribosylation factor-like 8B                                                                | 0,459782288 | 5,54E-07 | 1,39E-05 | 6,172158615 |
| acetyl-Coenzyme A acyltransferase 2 (mitochondrial 3-oxoacyl-Coenzyme A thiolase)              | 0,44082335  | 5,67E-07 | 1,42E-05 | 6,14757589  |
| hexokinase 3                                                                                   | 0,399790531 | 5,68E-07 | 1,42E-05 | 6,146162909 |
| histocompatibility 2, T region locus 22                                                        | 2,028445552 | 5,70E-07 | 1,42E-05 | 6,140953176 |
| C-type lectin domain family 7, member a                                                        | 0,231493466 | 5,71E-07 | 1,42E-05 | 6,140308973 |
| lysophosphatidylglycerol acyltransferase 1                                                     | 0,401347612 | 5,73E-07 | 1,43E-05 | 6,135420398 |
| lectin, galactose binding, soluble 8                                                           | 0,459927536 | 5,74E-07 | 1,43E-05 | 6,13427655  |
| melanoregulin                                                                                  | 0,475863908 | 5,82E-07 | 1,45E-05 | 6,119869843 |
| deltex 2 homolog (Drosophila)                                                                  | 2,151612375 | 5,90E-07 | 1,46E-05 | 6,106349002 |
| retinol saturase (all trans retinol 13,14 reductase)                                           | 0,448942173 | 5,91E-07 | 1,47E-05 | 6,10296311  |
| WD repeat and SOCS box-containing 2                                                            | 0,465177329 | 5,93E-07 | 1,47E-05 | 6,100300454 |
| tetratricopeptide repeat domain 39C                                                            | 2,230374024 | 5,97E-07 | 1,48E-05 | 6,093886435 |
| estrogen receptor 1 (alpha)                                                                    | 2,281272863 | 5,97E-07 | 1,48E-05 | 6,093453857 |
| adenosine kinase                                                                               | 0,418009336 | 6,08E-07 | 1,50E-05 | 6,073482571 |
| cAMP responsive element binding protein 5                                                      | 2,303713212 | 6,09E-07 | 1,50E-05 | 6,072557819 |
| thioredoxin interacting protein                                                                | 0,393378477 | 6,22E-07 | 1,53E-05 | 6,051201623 |
| RIKEN cDNA 2810474019 gene                                                                     | 2,463428202 | 6,24E-07 | 1,54E-05 | 6,046661671 |
| RIKEN cDNA 1700113122 gene                                                                     | 3,00750085  | 6,26E-07 | 1,54E-05 | 6,043566207 |
| inhibitor of DNA binding 2                                                                     | 2,249306526 | 6,27E-07 | 1,54E-05 | 6,041371867 |
| ubiquitin specific peptidase 53                                                                | 2,212505237 | 6,32E-07 | 1,55E-05 | 6,033750039 |
| phosphatidic acid phosphatase type 2A                                                          | 3,119229343 | 6,34E-07 | 1,55E-05 | 6,030194006 |
| glyceraldehyde-3-phosphate dehydrogenase pseudogene                                            | 2,798748957 | 6,44E-07 | 1,57E-05 | 6,014857583 |
| ketohexokinase                                                                                 | 0,464646603 | 6,45E-07 | 1,58E-05 | 6,012271953 |
| syndecan binding protein                                                                       | 0,475318766 | 6,46E-07 | 1,58E-05 | 6,011180267 |
| thyroglobulin                                                                                  | 2,933296472 | 6,60E-07 | 1,61E-05 | 5,988420323 |
| archaealysin family metalloproteinase 1                                                        | 0,395464732 | 6,63E-07 | 1,61E-05 | 5,983006349 |
| mucopolip 3                                                                                    | 0,359983406 | 6,68E-07 | 1,62E-05 | 5,975551694 |
| peripheral myelin protein 22                                                                   | 2,324455252 | 6,83E-07 | 1,66E-05 | 5,952708776 |
| FtsJ methyltransferase domain containing 2                                                     | 2,062058953 | 6,88E-07 | 1,67E-05 | 5,945079859 |
| huntingtin-associated protein 1                                                                | 0,395509152 | 6,91E-07 | 1,67E-05 | 5,939968303 |
| abhydrolase domain containing 12                                                               | 0,398626598 | 6,97E-07 | 1,69E-05 | 5,931797336 |
| grancalcin                                                                                     | 0,350041022 | 7,09E-07 | 1,71E-05 | 5,914076029 |
| sialic acid binding Ig-like lectin G                                                           | 2,680927199 | 7,11E-07 | 1,72E-05 | 5,910686331 |
| cDNA sequence BC028528                                                                         | 0,449362933 | 7,12E-07 | 1,72E-05 | 5,908712143 |
| Fanconi anemia, complementation group D2                                                       | 0,35453356  | 7,23E-07 | 1,74E-05 | 5,892576998 |
| phosphoinositide-3-kinase, regulatory subunit 6                                                | 2,261872653 | 7,26E-07 | 1,75E-05 | 5,888203335 |
| FXD domain-containing ion transport regulator 5                                                | 0,485319142 | 7,32E-07 | 1,76E-05 | 5,87995293  |
| interleukin 27 receptor, alpha                                                                 | 0,449073175 | 7,37E-07 | 1,77E-05 | 5,872664302 |
| chemokine (C-X-C motif) ligand 5                                                               | 4,203257091 | 7,38E-07 | 1,77E-05 | 5,872429206 |
| phorbol-12-myristate-13-acetate-induced protein 1                                              | 0,440946486 | 7,39E-07 | 1,77E-05 | 5,870292942 |
| biglycan                                                                                       | 0,407809679 | 7,39E-07 | 1,77E-05 | 5,869761196 |
| solute carrier family 25 (mitochondrial carrier, palmitoylcarnitine transporter), member 29    | 0,444451663 | 7,40E-07 | 1,77E-05 | 5,869510859 |
| calcium-binding tyrosine-(Y)-phosphorylation regulated (fibrousheathin 2)                      | 3,125821399 | 7,40E-07 | 1,77E-05 | 5,868337633 |
| purine-nucleoside phosphorylase                                                                | 2,033170218 | 7,41E-07 | 1,77E-05 | 5,866930853 |
| WNK lysine deficient protein kinase 1                                                          | 2,3914993   | 7,56E-07 | 1,80E-05 | 5,846838925 |
| DTW domain containing 1                                                                        | 2,73802506  | 7,57E-07 | 1,80E-05 | 5,844789106 |
| stromal cell-derived factor 2-like 1                                                           | 0,391992568 | 7,58E-07 | 1,80E-05 | 5,843969883 |
| transmembrane 6 superfamily member 1                                                           | 0,452990542 | 7,60E-07 | 1,80E-05 | 5,841140676 |
| Rho guanine nucleotide exchange factor (GEF) 4                                                 | 0,431992679 | 7,61E-07 | 1,80E-05 | 5,839814215 |
| pleckstrin homology domain containing, family G (with RhoGef domain) member 3                  | 2,07766459  | 7,63E-07 | 1,80E-05 | 5,837594699 |
| lamin A                                                                                        | 0,461335708 | 7,70E-07 | 1,82E-05 | 5,827876758 |
| glycerol phosphate dehydrogenase 2, mitochondrial                                              | 2,356293857 | 7,85E-07 | 1,85E-05 | 5,807134805 |
| protein phosphatase 1, catalytic subunit, beta isoform                                         | 2,094203191 | 7,88E-07 | 1,86E-05 | 5,802681101 |
| sorting nexin family member 27                                                                 | 0,472794928 | 7,94E-07 | 1,87E-05 | 5,795250916 |
| H2A histone family, member Y                                                                   | 2,536926544 | 8,08E-07 | 1,90E-05 | 5,776469867 |
| SH3-binding kinase 1                                                                           | 0,465576254 | 8,17E-07 | 1,92E-05 | 5,764892    |
| triggering receptor expressed on myeloid cells 3                                               | 4,169881478 | 8,18E-07 | 1,92E-05 | 5,763614326 |
| lactamase, beta                                                                                | 2,04383235  | 8,31E-07 | 1,95E-05 | 5,74796356  |
| family with sequence similarity 133, member B                                                  | 2,457723616 | 8,34E-07 | 1,95E-05 | 5,743778813 |
| potassium channel tetramerisation domain containing 14                                         | 4,201197035 | 8,38E-07 | 1,96E-05 | 5,739569169 |
| microtubule-associated protein, RP/EB family, member 2                                         | 0,452139635 | 8,49E-07 | 1,98E-05 | 5,725463244 |
| solute carrier organic anion transporter family, member 3a1                                    | 2,759037493 | 8,49E-07 | 1,98E-05 | 5,724965131 |
| MARCKS-like 1                                                                                  | 2,046248128 | 8,85E-07 | 2,06E-05 | 5,824082226 |
| family with sequence similarity 46, member A                                                   | 2,128909524 | 8,89E-07 | 2,07E-05 | 5,677159149 |
| HEAT repeat containing 7A                                                                      | 0,469844496 | 8,90E-07 | 2,07E-05 | 5,675738233 |
| kallikrein 1-related peptidase b27                                                             | 0,388729986 | 8,95E-07 | 2,08E-05 | 5,670528735 |
| transporter 2, ATP-binding cassette, sub-family B (MDR/TAP)                                    | 2,02363041  | 8,96E-07 | 2,08E-05 | 5,669222635 |
| importin 13                                                                                    | 0,490561222 | 9,06E-07 | 2,10E-05 | 5,657927483 |
| WD repeat domain 41                                                                            | 0,471644005 | 9,08E-07 | 2,10E-05 | 5,654964489 |
| actin, alpha 2, smooth muscle, aorta                                                           | 0,288273127 | 9,13E-07 | 2,11E-05 | 5,64981949  |

|                                                                             |             |          |          |             |
|-----------------------------------------------------------------------------|-------------|----------|----------|-------------|
| RIKEN cDNA 2610528A11 gene                                                  | 0,344583096 | 9,21E-07 | 2,12E-05 | 5,640257397 |
| vaccinia related kinase 2                                                   | 0,473179938 | 9,24E-07 | 2,13E-05 | 5,636508699 |
| uridine phosphorylase 1                                                     | 2,310937808 | 9,25E-07 | 2,13E-05 | 5,635451006 |
| RAN binding protein 2                                                       | 2,100344816 | 9,36E-07 | 2,15E-05 | 5,623064986 |
| erythrocyte protein band 4.1-like 1                                         | 0,434586826 | 9,44E-07 | 2,17E-05 | 5,614973178 |
| ubiquitin family domain containing 1                                        | 2,028323281 | 9,46E-07 | 2,17E-05 | 5,611822384 |
| carbonic anhydrase 2                                                        | 2,143647143 | 9,50E-07 | 2,18E-05 | 5,607510725 |
| dolichyl pyrophosphate phosphatase 1                                        | 0,439740391 | 9,52E-07 | 2,18E-05 | 5,606097794 |
| FCH and double SH3 domains 2                                                | 2,197929322 | 9,52E-07 | 2,18E-05 | 5,605288262 |
| carbohydrate (chondroitin 6/keratan) sulfotransferase 3                     | 2,352877474 | 9,59E-07 | 2,19E-05 | 5,597836604 |
| dual specificity phosphatase 23                                             | 0,486455036 | 9,69E-07 | 2,21E-05 | 5,587599112 |
| laminin, gamma 1                                                            | 2,049697459 | 9,84E-07 | 2,24E-05 | 5,570765409 |
| RAB31, member RAS oncogene family                                           | 0,457293547 | 9,87E-07 | 2,24E-05 | 5,568378985 |
| ATPase type 13A2                                                            | 0,410785208 | 1,01E-06 | 2,30E-05 | 5,539704195 |
| ArfGAP with coiled-coil, ankyrin repeat and PH domains 3                    | 0,426682286 | 1,02E-06 | 2,31E-05 | 5,533379119 |
| glucosaminyl (N-acetyl) transferase 1, core 2                               | 0,486828783 | 1,06E-06 | 2,39E-05 | 5,495252134 |
| syndecan binding protein                                                    | 0,485840115 | 1,07E-06 | 2,41E-05 | 5,483762543 |
| killer cell lectin-like receptor family I member 1                          | 2,579266596 | 1,07E-06 | 2,41E-05 | 5,482131347 |
| neuron navigator 1                                                          | 0,485461965 | 1,08E-06 | 2,42E-05 | 5,477634142 |
| zinc finger CCHC type containing 12A                                        | 2,115150031 | 1,08E-06 | 2,43E-05 | 5,47402459  |
| peripheral myelin protein 22                                                | 2,277738468 | 1,09E-06 | 2,44E-05 | 5,464775511 |
| caspase 2                                                                   | 2,057133335 | 1,10E-06 | 2,46E-05 | 5,456723808 |
| connective tissue growth factor                                             | 0,407957189 | 1,10E-06 | 2,46E-05 | 5,45662101  |
| cadherin-related family member 1                                            | 0,310063717 | 1,10E-06 | 2,46E-05 | 5,45427214  |
| RIKEN cDNA 2410002F23 gene                                                  | 0,487907067 | 1,13E-06 | 2,52E-05 | 5,429232886 |
| SAM and SH3 domain containing 3                                             | 0,46475729  | 1,14E-06 | 2,53E-05 | 5,421491063 |
| mannosidase, beta A, lysosomal                                              | 0,498549507 | 1,15E-06 | 2,55E-05 | 5,411767276 |
| hydrogen voltage-gated channel 1                                            | 0,464495001 | 1,18E-06 | 2,63E-05 | 5,378776428 |
| acyl-CoA synthetase short-chain family member 2                             | 0,442171383 | 1,20E-06 | 2,66E-05 | 5,363913731 |
| RIKEN cDNA 2400003C14 gene                                                  | 3,541195109 | 1,21E-06 | 2,67E-05 | 5,357654526 |
| transmembrane 4 superfamily member 5                                        | 0,433633214 | 1,21E-06 | 2,67E-05 | 5,357295603 |
| insulin-like growth factor 2                                                | 2,302207929 | 1,22E-06 | 2,69E-05 | 5,348916098 |
| hepcidin antimicrobial peptide                                              | 4,223205855 | 1,22E-06 | 2,69E-05 | 5,348703867 |
| FYVE, RhoGEF and PH domain containing 2                                     | 0,424652263 | 1,23E-06 | 2,71E-05 | 5,337990092 |
| topoisomerase (DNA) I                                                       | 2,773770193 | 1,23E-06 | 2,71E-05 | 5,335987808 |
| LON peptidase N-terminal domain and ring finger 3                           | 0,436801579 | 1,24E-06 | 2,73E-05 | 5,328151931 |
| interleukin 15 receptor, alpha chain                                        | 2,171239476 | 1,24E-06 | 2,73E-05 | 5,325462534 |
| Bmi1 polycomb ring finger oncogene                                          | 2,045148703 | 1,25E-06 | 2,74E-05 | 5,321480304 |
| brain protein 44                                                            | 0,489151106 | 1,26E-06 | 2,75E-05 | 5,316801911 |
| carbohydrate sulfotransferase 11                                            | 2,330592816 | 1,26E-06 | 2,75E-05 | 5,314061776 |
| serum/glucocorticoid regulated kinase 3                                     | 0,483011133 | 1,27E-06 | 2,76E-05 | 5,308281564 |
| calcium and integrin binding family member 2                                | 0,466242911 | 1,27E-06 | 2,78E-05 | 5,30144164  |
| GATS protein-like 3                                                         | 2,114137083 | 1,28E-06 | 2,79E-05 | 5,295557196 |
| syndecan binding protein                                                    | 0,466731681 | 1,29E-06 | 2,80E-05 | 5,291222995 |
| solute carrier organic anion transporter family, member 3a1                 | 2,730180274 | 1,31E-06 | 2,85E-05 | 5,269819204 |
| cDNA sequence BC024659                                                      | 0,461518791 | 1,32E-06 | 2,86E-05 | 5,263579059 |
| hexosaminidase A                                                            | 0,445858421 | 1,33E-06 | 2,87E-05 | 5,256750527 |
| deltex 2 homolog (Drosophila)                                               | 2,195441741 | 1,33E-06 | 2,87E-05 | 5,256172501 |
| dipeptidase 2                                                               | 0,366045011 | 1,33E-06 | 2,87E-05 | 5,255242655 |
| signal transducer and activator of transcription 3                          | 2,276655884 | 1,33E-06 | 2,87E-05 | 5,25522533  |
| Ras association (RalGDS/AF-6) domain family member 4                        | 0,483431183 | 1,34E-06 | 2,89E-05 | 5,248737997 |
| lipase, family member N                                                     | 0,335408156 | 1,39E-06 | 2,99E-05 | 5,211295126 |
| dual specificity phosphatase 2                                              | 2,781129425 | 1,39E-06 | 3,00E-05 | 5,206926988 |
| fumarylacetoacetate hydrolase                                               | 2,178809396 | 1,41E-06 | 3,02E-05 | 5,197313948 |
| myosin, light polypeptide 9, regulatory                                     | 0,48646297  | 1,41E-06 | 3,02E-05 | 5,196327844 |
| sigma non-opioid intracellular receptor 1                                   | 0,490981664 | 1,43E-06 | 3,05E-05 | 5,183086873 |
| DNA-damage regulated autophagy modulator 1                                  | 0,47235481  | 1,43E-06 | 3,06E-05 | 5,1800118   |
| CUGBP, Elav-like family member 6                                            | 2,647653986 | 1,44E-06 | 3,08E-05 | 5,172092847 |
| DNA segment, Chr 16, ERATO Doi 472, expressed                               | 2,149867016 | 1,44E-06 | 3,08E-05 | 5,169909473 |
| Rho GTPase activating protein 9                                             | 0,472567907 | 1,45E-06 | 3,09E-05 | 5,165812546 |
| interleukin 28 receptor alpha                                               | 0,425634791 | 1,45E-06 | 3,09E-05 | 5,16439996  |
| glucuronidase, beta                                                         | 0,449158139 | 1,46E-06 | 3,10E-05 | 5,161864741 |
| annexin A1                                                                  | 0,400271948 | 1,48E-06 | 3,15E-05 | 5,142328941 |
| matrix metalloproteinase 13                                                 | 5,922580062 | 1,49E-06 | 3,15E-05 | 5,13999366  |
| integrin alpha 5 (fibronectin receptor alpha)                               | 2,186262473 | 1,49E-06 | 3,16E-05 | 5,136648757 |
| Rap guanine nucleotide exchange factor (GEF) 5                              | 2,559405428 | 1,50E-06 | 3,17E-05 | 5,127339776 |
| solute carrier organic anion transporter family, member 4a1                 | 0,450831772 | 1,50E-06 | 3,17E-05 | 5,127332554 |
| jumonji C domain-containing histone demethylase 1 homolog D (S. cerevisiae) | 0,486964771 | 1,51E-06 | 3,19E-05 | 5,122412151 |
| deltex 3-like (Drosophila)                                                  | 2,761896213 | 1,52E-06 | 3,19E-05 | 5,118710258 |
| FK506 binding protein 1b                                                    | 0,463218919 | 1,52E-06 | 3,19E-05 | 5,117511684 |
| 3'-phosphoadenosine 5'-phosphosulfate synthase 2                            | 0,424063806 | 1,53E-06 | 3,20E-05 | 5,112362717 |
| wingless-related MMTV integration site 6                                    | 2,17503244  | 1,53E-06 | 3,20E-05 | 5,111234524 |
| integrin alpha V                                                            | 2,552804651 | 1,53E-06 | 3,21E-05 | 5,107158378 |
| tetraspanin 4                                                               | 0,430890981 | 1,54E-06 | 3,21E-05 | 5,105310195 |
| SAM domain, SH3 domain and nuclear localization signals, 1                  | 2,492165934 | 1,54E-06 | 3,21E-05 | 5,105262044 |
| tumor necrosis factor receptor superfamily, member 4                        | 0,445686689 | 1,54E-06 | 3,22E-05 | 5,102188927 |
| predicted gene 5590                                                         | 0,41947075  | 1,55E-06 | 3,22E-05 | 5,099117276 |
| insulin-like growth factor I receptor                                       | 2,108179968 | 1,57E-06 | 3,27E-05 | 5,080350396 |
| RIKEN cDNA 6030429G01 gene                                                  | 0,478342809 | 1,58E-06 | 3,28E-05 | 5,075214985 |
| adenosine deaminase, RNA-specific                                           | 2,450334934 | 1,58E-06 | 3,28E-05 | 5,074806513 |
| adenosine kinase                                                            | 0,293923567 | 1,59E-06 | 3,29E-05 | 5,072149646 |

|                                                                                         |             |          |          |             |
|-----------------------------------------------------------------------------------------|-------------|----------|----------|-------------|
| poly(A) polymerase gamma                                                                | 0,498488981 | 1,59E-06 | 3,29E-05 | 5,070360449 |
| tumor necrosis factor (ligand) superfamily, member 8                                    | 2,130385641 | 1,61E-06 | 3,31E-05 | 5,058709357 |
| cell division cycle 7 ( <i>S. cerevisiae</i> )                                          | 0,415761448 | 1,61E-06 | 3,32E-05 | 5,055151621 |
| signal transducer and activator of transcription 3                                      | 2,230313303 | 1,62E-06 | 3,33E-05 | 5,05148168  |
| translocator protein                                                                    | 2,030551522 | 1,65E-06 | 3,39E-05 | 5,031039829 |
| spermine oxidase                                                                        | 2,173613094 | 1,67E-06 | 3,42E-05 | 5,018815106 |
| vacuolar protein sorting 26 homolog B (yeast)                                           | 3,820870301 | 1,67E-06 | 3,42E-05 | 5,018449664 |
| chemokine (C-X-C motif) ligand 10                                                       | 3,615620711 | 1,71E-06 | 3,50E-05 | 4,992851597 |
| adaptor protein, phosphotyrosine interaction, PH domain and leucine zipper containing 2 | 0,496167965 | 1,72E-06 | 3,51E-05 | 4,988805428 |
| acyl-CoA synthetase long-chain family member 4                                          | 2,545227478 | 1,73E-06 | 3,54E-05 | 4,97978028  |
| mitogen-activated protein kinase kinase kinase 1                                        | 0,467684334 | 1,75E-06 | 3,57E-05 | 4,96916657  |
| RIKEN cDNA 5730469M10 gene                                                              | 0,424943387 | 1,75E-06 | 3,57E-05 | 4,968355755 |
| proviral integration site 1                                                             | 2,679604997 | 1,77E-06 | 3,59E-05 | 4,958997441 |
| protein kinase inhibitor beta, cAMP dependent, testis specific                          | 2,208929244 | 1,78E-06 | 3,61E-05 | 4,952056845 |
| Kruppel-like factor 2 (lung)                                                            | 0,355425166 | 1,82E-06 | 3,68E-05 | 4,930986126 |
| progesterone and adiponectin receptor family member VII                                 | 0,346177212 | 1,85E-06 | 3,74E-05 | 4,911393423 |
| malectin                                                                                | 0,489426154 | 1,85E-06 | 3,74E-05 | 4,90949633  |
| intermediate filament family orphan 2                                                   | 2,034498642 | 1,86E-06 | 3,74E-05 | 4,905364381 |
| ST3 beta-galactoside alpha-2,3-sialyltransferase 1                                      | 2,146126327 | 1,86E-06 | 3,74E-05 | 4,904466431 |
| abhydrolase domain containing 5                                                         | 0,478889153 | 1,86E-06 | 3,74E-05 | 4,903972605 |
| aldehyde dehydrogenase 16 family, member A1                                             | 0,480026841 | 1,88E-06 | 3,78E-05 | 4,892666208 |
| membrane-spanning 4-domains, subfamily A, member 6D                                     | 2,375905808 | 1,89E-06 | 3,79E-05 | 4,888717039 |
| RIKEN cDNA 5730528L13 gene                                                              | 2,057750162 | 1,91E-06 | 3,82E-05 | 4,876307383 |
| per-pentamer repeat gene                                                                | 0,470741447 | 1,92E-06 | 3,82E-05 | 4,874861317 |
| zinc finger protein 52                                                                  | 2,098402488 | 1,92E-06 | 3,82E-05 | 4,873517538 |
| RAB12, member RAS oncogene family                                                       | 2,060774823 | 1,92E-06 | 3,83E-05 | 4,871568017 |
| Fyn proto-oncogene                                                                      | 2,199188715 | 1,99E-06 | 3,95E-05 | 4,835395538 |
| consortin, connexin sorting protein                                                     | 0,493636329 | 2,00E-06 | 3,96E-05 | 4,830931442 |
| RAB38, member of RAS oncogene family                                                    | 0,377940257 | 2,01E-06 | 3,99E-05 | 4,823242969 |
| transcription factor 7-like 2, T-cell specific, HMG-box                                 | 0,406417811 | 2,02E-06 | 3,99E-05 | 4,820823517 |
| antigen identified by monoclonal antibody Ki 67                                         | 2,20766786  | 2,03E-06 | 4,00E-05 | 4,81632555  |
| toll-like receptor 2                                                                    | 2,209087308 | 2,06E-06 | 4,06E-05 | 4,799747837 |
| metastasis associated in colon cancer 1                                                 | 3,444729625 | 2,06E-06 | 4,06E-05 | 4,799213226 |
| poliovirus receptor-related 2                                                           | 2,147963583 | 2,06E-06 | 4,06E-05 | 4,797362386 |
| WDYHV motif containing 1                                                                | 2,013183509 | 2,07E-06 | 4,07E-05 | 4,793669604 |
| prostaglandin-endoperoxide synthase 2                                                   | 2,205179933 | 2,12E-06 | 4,14E-05 | 4,770565767 |
| interleukin 15 receptor, alpha chain                                                    | 2,201648444 | 2,22E-06 | 4,32E-05 | 4,721956502 |
| myotubularin related protein 14                                                         | 2,075149306 | 2,24E-06 | 4,37E-05 | 4,710576481 |
| hypothetical LOC100504230                                                               | 2,248125553 | 2,26E-06 | 4,39E-05 | 4,703059216 |
| fibrinogen-like protein 2                                                               | 2,802632696 | 2,31E-06 | 4,48E-05 | 4,679229436 |
| myo-inositol 1-phosphate synthase A1                                                    | 0,374937174 | 2,32E-06 | 4,49E-05 | 4,677403234 |
| calcium/calmodulin-dependent protein kinase I                                           | 0,362625345 | 2,33E-06 | 4,51E-05 | 4,669859734 |
| ATP-binding cassette, sub-family B (MDR/TAP), member 6                                  | 0,457436137 | 2,34E-06 | 4,51E-05 | 4,667913593 |
| leucine-rich repeat kinase 2                                                            | 2,240596201 | 2,35E-06 | 4,53E-05 | 4,663348535 |
| RIKEN cDNA 1700113I22 gene                                                              | 2,527280151 | 2,35E-06 | 4,53E-05 | 4,659809229 |
| FXD domain-containing ion transport regulator 2                                         | 0,407676519 | 2,37E-06 | 4,56E-05 | 4,651265567 |
| protein tyrosine phosphatase, non-receptor type 1                                       | 2,503476328 | 2,38E-06 | 4,57E-05 | 4,646626954 |
| solute carrier family 38, member 2                                                      | 0,440963721 | 2,39E-06 | 4,58E-05 | 4,644156948 |
| cell division cycle associated 8                                                        | 0,441136659 | 2,40E-06 | 4,60E-05 | 4,638883493 |
| MARCKS-like 1                                                                           | 2,143379246 | 2,43E-06 | 4,65E-05 | 4,625076072 |
| tumor suppressor candidate 1                                                            | 0,467493669 | 2,44E-06 | 4,66E-05 | 4,621231816 |
| t-complex protein 1                                                                     | 2,703169107 | 2,44E-06 | 4,66E-05 | 4,620477382 |
| BCL2-like 14 (apoptosis facilitator)                                                    | 0,343914748 | 2,46E-06 | 4,67E-05 | 4,615555284 |
| heparan sulfate (glucosamine) 3-O-sulfotransferase 1                                    | 2,453232667 | 2,49E-06 | 4,71E-05 | 4,602135754 |
| zinc finger protein 296                                                                 | 0,454302096 | 2,49E-06 | 4,71E-05 | 4,601368425 |
| predicted gene 11818                                                                    | 0,473356121 | 2,50E-06 | 4,73E-05 | 4,597614667 |
| liver glycogen phosphorylase                                                            | 0,470506935 | 2,50E-06 | 4,73E-05 | 4,596410257 |
| brain-specific angiogenesis inhibitor 1-associated protein 2                            | 0,488590659 | 2,52E-06 | 4,76E-05 | 4,586805937 |
| TatD DNase domain containing 2                                                          | 0,496735325 | 2,55E-06 | 4,80E-05 | 4,577477792 |
| SFFV proviral integration 1                                                             | 0,493761093 | 2,55E-06 | 4,80E-05 | 4,575617321 |
| furry homolog ( <i>Drosophila</i> )                                                     | 0,486000913 | 2,58E-06 | 4,84E-05 | 4,566032357 |
| uridine phosphorylase 1                                                                 | 2,034894289 | 2,60E-06 | 4,89E-05 | 4,555407397 |
| endothelin 1                                                                            | 2,044698521 | 2,61E-06 | 4,90E-05 | 4,551451434 |
| arrestin domain containing 3                                                            | 2,233273185 | 2,62E-06 | 4,91E-05 | 4,547067265 |
| interleukin 17 receptor D                                                               | 2,299324935 | 2,64E-06 | 4,94E-05 | 4,540209762 |
| Fas (TNF receptor superfamily member 6)                                                 | 0,448884338 | 2,64E-06 | 4,94E-05 | 4,54011078  |
| integrin alpha 1                                                                        | 0,494012005 | 2,70E-06 | 5,04E-05 | 4,517049532 |
| matrix metalloproteinase 14 (membrane-inserted)                                         | 2,18764104  | 2,72E-06 | 5,07E-05 | 4,509854468 |
| family with sequence similarity 102, member A                                           | 0,417656822 | 2,74E-06 | 5,11E-05 | 4,500343    |
| oncostatin M                                                                            | 3,280773018 | 2,77E-06 | 5,15E-05 | 4,491520493 |
| cDNA sequence X99384                                                                    | 0,489616258 | 2,78E-06 | 5,18E-05 | 4,484428831 |
| ring finger protein 128                                                                 | 0,334335565 | 2,80E-06 | 5,20E-05 | 4,479422417 |
| cystinosis, nephropathic                                                                | 0,485848599 | 2,84E-06 | 5,28E-05 | 4,462551845 |
| endothelin converting enzyme 2                                                          | 0,430112406 | 2,89E-06 | 5,35E-05 | 4,447155117 |
| family with sequence similarity 117, member A                                           | 0,391152424 | 2,89E-06 | 5,35E-05 | 4,444609725 |
| AF4/FMR2 family, member 1                                                               | 2,141356006 | 2,92E-06 | 5,39E-05 | 4,436528384 |
| open reading frame 19                                                                   | 2,091782463 | 2,94E-06 | 5,43E-05 | 4,42829011  |
| MOB1, Mps One Binder kinase activator-like 2B (yeast)                                   | 2,300226138 | 2,94E-06 | 5,43E-05 | 4,426781717 |
| cytochrome c oxidase, subunit XVII assembly protein homolog (yeast)                     | 2,091315647 | 2,95E-06 | 5,44E-05 | 4,424549681 |
| embryonic ectoderm development                                                          | 2,093569518 | 3,02E-06 | 5,55E-05 | 4,398413786 |
| RIKEN cDNA 1500003O03 gene                                                              | 2,240412625 | 3,03E-06 | 5,55E-05 | 4,396061047 |

|                                                                                     |             |          |             |             |
|-------------------------------------------------------------------------------------|-------------|----------|-------------|-------------|
| fermitin family homolog 3 (Drosophila)                                              | 0,487813888 | 3,05E-06 | 5,57E-05    | 4,390941899 |
| RIKEN cDNA 2010002N04 gene                                                          | 4,10638844  | 3,05E-06 | 5,57E-05    | 4,387962867 |
| isovaleryl coenzyme A dehydrogenase                                                 | 0,495144355 | 3,06E-06 | 5,57E-05    | 4,387097554 |
| glycerophosphodiester phosphodiesterase domain containing 5                         | 0,473962806 | 3,06E-06 | 5,57E-05    | 4,386956914 |
| myxovirus (influenza virus) resistance 2                                            | 2,25304215  | 3,09E-06 | 5,63E-05    | 4,375432459 |
| acetyl-Coenzyme A acyltransferase 2 (mitochondrial 3-oxoacyl-Coenzyme A thiolase)   | 0,39933132  | 3,15E-06 | 5,72E-05    | 4,355640129 |
| phosphodiesterase 1B, Ca2+-calmodulin dependent                                     | 0,461732693 | 3,16E-06 | 5,73E-05    | 4,353798343 |
| endonuclease/exonuclease/phosphatase family domain containing 1                     | 0,362324504 | 3,16E-06 | 5,73E-05    | 4,353321538 |
| solute carrier family 22 (organic cation transporter), member 5                     | 2,022963931 | 3,17E-06 | 5,75E-05    | 4,348562629 |
| Max interacting protein 1                                                           | 3,954852846 | 3,19E-06 | 5,77E-05    | 4,34179218  |
| leucine zipper transcription factor-like 1                                          | 2,039319274 | 3,19E-06 | 5,77E-05    | 4,341715315 |
| centromere protein V                                                                | 0,428783793 | 3,21E-06 | 5,80E-05    | 4,334717848 |
| predicted gene 6377                                                                 | 2,36777033  | 3,27E-06 | 5,91E-05    | 4,315326695 |
| gap junction protein, alpha 1                                                       | 2,000128484 | 3,32E-06 | 5,98E-05    | 4,300603829 |
| family with sequence similarity 98, member C                                        | 0,469504147 | 3,33E-06 | 6,00E-05    | 4,296877731 |
| single immunoglobulin and toll-interleukin 1 receptor (TIR) domain                  | 0,477383559 | 3,35E-06 | 6,03E-05    | 4,290734641 |
| prenylcysteine oxidase 1                                                            | 0,499151189 | 3,36E-06 | 6,03E-05    | 4,28934667  |
| tet oncogene family member 2                                                        | 2,612995822 | 3,44E-06 | 6,13E-05    | 4,264004576 |
| ral guanine nucleotide dissociation stimulator-like 2                               | 0,479959987 | 3,46E-06 | 6,18E-05    | 4,258106032 |
| zinc finger, MIZ-type containing 2                                                  | 0,462095496 | 3,47E-06 | 6,20E-05    | 4,254504667 |
| alanine-glyoxylate aminotransferase 2-like 2                                        | 2,582785578 | 3,52E-06 | 6,28E-05    | 4,239204365 |
| kallikrein 1-related peptidase b11                                                  | 0,331969075 | 3,54E-06 | 6,30E-05    | 4,232904574 |
| major facilitator superfamily domain containing 7A                                  | 2,235061221 | 3,59E-06 | 6,39E-05    | 4,217852537 |
| calcium/calmodulin-dependent serine protein kinase (MAGUK family)                   | 0,499490136 | 3,60E-06 | 6,39E-05    | 4,216614638 |
| nicotinamide N-methyltransferase                                                    | 0,413680221 | 3,66E-06 | 6,48E-05    | 4,198031673 |
| claudin domain containing 1                                                         | 2,048991918 | 3,72E-06 | 6,56E-05    | 4,18338915  |
| tetratricopeptide repeat domain 39A                                                 | 0,396118697 | 3,79E-06 | 6,67E-05    | 4,163993423 |
| pleckstrin homology-like domain, family A, member 1                                 | 2,724903483 | 3,80E-06 | 6,70E-05    | 4,159428433 |
| microsomal glutathione S-transferase 1                                              | 0,464457343 | 3,81E-06 | 6,71E-05    | 4,156157641 |
| TLC domain containing 1                                                             | 2,743136731 | 4,06E-06 | 7,13E-05    | 4,09108422  |
| lymphocyte cytosolic protein 2                                                      | 2,450026363 | 4,09E-06 | 7,17E-05    | 4,083223713 |
| vesicle-associated membrane protein, associated protein A                           | 2,749387551 | 4,10E-06 | 7,17E-05    | 4,081662788 |
| tumor necrosis factor, alpha-induced protein 8-like 2                               | 0,496975863 | 4,13E-06 | 7,22E-05    | 4,073631028 |
| dual specificity phosphatase 8                                                      | 2,121648389 | 4,17E-06 | 7,28E-05    | 4,062166574 |
| selenoprotein X 1                                                                   | 0,481178444 | 4,19E-06 | 7,29E-05    | 4,058855449 |
| sushi domain containing 2                                                           | 2,020510272 | 4,19E-06 | 7,29E-05    | 4,057444546 |
| guanidinoacetate methyltransferase                                                  | 0,449698332 | 4,22E-06 | 7,33E-05    | 4,050251346 |
| signal transducer and activator of transcription 2                                  | 3,161634423 | 4,22E-06 | 7,33E-05    | 4,049443365 |
| PDZK1 interacting protein 1                                                         | 2,819104211 | 4,23E-06 | 7,33E-05    | 4,049044295 |
| ring finger protein 213                                                             | 2,001749291 | 4,27E-06 | 7,39E-05    | 4,038406705 |
| phosphodiesterase 1B, Ca2+-calmodulin dependent                                     | 0,486512233 | 4,30E-06 | 7,43E-05    | 4,031288925 |
| DnaJ (Hsp40) homolog, subfamily B, member 4                                         | 2,220316216 | 4,32E-06 | 7,46E-05    | 4,025280516 |
| diacylglycerol O-acyltransferase 2                                                  | 2,053614522 | 4,41E-06 | 7,60E-05    | 4,004002131 |
| a disintegrin and metallopeptidase domain 8                                         | 0,495933587 | 4,46E-06 | 7,69E-05    | 3,991941927 |
| endothelin receptor type B                                                          | 2,292038608 | 4,47E-06 | 7,70E-05    | 3,989616116 |
| acyl-CoA synthetase long-chain family member 4                                      | 2,228107188 | 4,55E-06 | 7,82E-05    | 3,971599368 |
| UDP-GlcNAc:betaGal beta-1,3-N-acetylglucosaminyltransferase 5                       | 0,495154782 | 4,56E-06 | 7,82E-05    | 3,970268562 |
| D-dopachrome tautomerase                                                            | 2,159794186 | 4,56E-06 | 7,82E-05    | 3,969531127 |
| galactose mutarotase                                                                | 0,497638333 | 4,57E-06 | 7,83E-05    | 3,967644598 |
| family with sequence similarity 55, member D                                        | 0,418124517 | 4,60E-06 | 7,87E-05    | 3,959794641 |
| RCS domain containing 1                                                             | 2,029003158 | 4,61E-06 | 7,89E-05    | 3,957250953 |
| 4lysine (K)-specific demethylase 6A                                                 | 0,476293631 | 4,64E-06 | 7,92E-05    | 3,950722045 |
| asparagine synthetase                                                               | 2,412862016 | 4,75E-06 | 8,09E-05    | 3,927790841 |
| myosin VA                                                                           | 0,488730106 | 4,83E-06 | 8,23E-05    | 3,908605805 |
| interleukin 6 receptor, alpha                                                       | 0,499252995 | 4,91E-06 | 8,33E-05    | 3,892854962 |
| phosphofurin acidic cluster sorting protein 1                                       | 2,086960206 | 5,00E-06 | 8,46E-05    | 3,874063651 |
| DENN/MADD domain containing 3                                                       | 2,233653428 | 5,03E-06 | 8,51E-05    | 3,867218235 |
| mitogen-activated protein kinase kinase 8                                           | 2,142984605 | 5,09E-06 | 8,61E-05    | 3,853983817 |
| EGL nine homolog 3 (C. elegans)                                                     | 4,186831617 | 5,17E-06 | 8,72E-05    | 3,8391435   |
| zinc finger homeobox 3                                                              | 2,035640781 | 5,24E-06 | 8,83E-05    | 3,825123821 |
| plexin B2                                                                           | 0,457298141 | 5,31E-06 | 8,94E-05    | 3,81019639  |
| G protein-coupled receptor 85                                                       | 2,10307584  | 5,43E-06 | 9,13E-05    | 3,786405572 |
| triosephosphate isomerase 1                                                         | 2,590683653 | 5,45E-06 | 9,15E-05    | 3,783409741 |
| T-cell, immune regulator 1, ATPase, H+ transporting, lysosomal V0 protein A3        | 0,464468324 | 5,53E-06 | 9,27E-05    | 3,767768523 |
| nurim (nuclear envelope membrane protein)                                           | 0,462087521 | 5,53E-06 | 9,27E-05    | 3,767644201 |
| pseudouridylate synthase-like 1                                                     | 0,479922283 | 5,55E-06 | 9,29E-05    | 3,764516986 |
| glutathione S-transferase, theta 3                                                  | 2,253003943 | 5,58E-06 | 9,33E-05    | 3,758859206 |
| NEDD4 binding protein 1                                                             | 2,004294848 | 5,61E-06 | 9,37E-05    | 3,753084316 |
| acidic (leucine-rich) nuclear phosphoprotein 32 family, member A                    | 3,545244188 | 5,67E-06 | 9,45E-05    | 3,742387832 |
| protein tyrosine phosphatase-like (proline instead of catalytic arginine), member a | 2,007339329 | 5,70E-06 | 9,50E-05    | 3,736653374 |
| calmodulin 5                                                                        | 2,179017711 | 5,91E-06 | 9,82E-05    | 3,698483287 |
| PHD finger protein 11                                                               | 2,235049645 | 5,93E-06 | 9,84E-05    | 3,694895546 |
| ryanodine receptor 1, skeletal muscle                                               | 0,357710878 | 5,95E-06 | 9,85E-05    | 3,692577452 |
| ras homolog gene family, member J                                                   | 0,391606372 | 5,98E-06 | 9,89E-05    | 3,687360921 |
| cyclin-dependent kinase 20                                                          | 0,413413391 | 5,98E-06 | 9,89E-05    | 3,686554743 |
| ribonuclease, RNase A family, 6                                                     | 0,488954725 | 6,15E-06 | 0,000101404 | 3,657284925 |
| kinesin family member 22                                                            | 0,484890307 | 6,18E-06 | 0,00010158  | 3,652901826 |
| F11 receptor                                                                        | 2,04603508  | 6,18E-06 | 0,00010158  | 3,652126592 |
| insulin-like growth factor 2 receptor                                               | 0,453648182 | 6,20E-06 | 0,000101779 | 3,649252048 |
| TNF receptor associated factor 4                                                    | 2,447696009 | 6,32E-06 | 0,000103298 | 3,629634951 |
| a disintegrin and metallopeptidase domain 11                                        | 0,484177267 | 6,41E-06 | 0,000104616 | 3,613911544 |

|                                                                            |             |          |             |             |
|----------------------------------------------------------------------------|-------------|----------|-------------|-------------|
| sphingosine phosphate lyase 1                                              | 0,475855941 | 6,50E-06 | 0,000105824 | 3,599447746 |
| transducin (beta)-like 1 X-linked                                          | 2,112143317 | 6,57E-06 | 0,00010676  | 3,587778031 |
| EH-domain containing 1                                                     | 2,158893317 | 6,77E-06 | 0,000109627 | 3,556917618 |
| thioredoxin-related transmembrane protein 4                                | 0,48174739  | 6,80E-06 | 0,000109924 | 3,552367067 |
| glutamyl-peptide cyclotransferase (glutamyl cyclase)                       | 0,487365577 | 7,04E-06 | 0,000113257 | 3,516284831 |
| proteasome (prosome, macropain) 26S subunit, non-ATPase, 11                | 2,237346639 | 7,05E-06 | 0,000113291 | 3,515153335 |
| amphiregulin                                                               | 2,181354964 | 7,07E-06 | 0,000113473 | 3,511454694 |
| lysozyme 1                                                                 | 0,487341262 | 7,25E-06 | 0,000116169 | 3,484906457 |
| hexokinase 2                                                               | 2,201695811 | 7,46E-06 | 0,000119094 | 3,455714159 |
| RELT-like 1                                                                | 0,443287679 | 7,56E-06 | 0,000120474 | 3,442078985 |
| transmembrane and coiled-coil domains 6                                    | 2,003993925 | 7,65E-06 | 0,000121746 | 3,429499168 |
| feline sarcoma oncogene                                                    | 0,495556352 | 7,67E-06 | 0,000121909 | 3,426486455 |
| mitogen-activated protein kinase associated protein 1                      | 0,455238196 | 7,73E-06 | 0,000122659 | 3,419284506 |
| doublesex and mab-3 related transcription factor like family A2            | 0,49705831  | 7,74E-06 | 0,000122769 | 3,417542697 |
| SRY-box containing gene 4                                                  | 0,367098277 | 7,79E-06 | 0,00012352  | 3,410375869 |
| thymopoietin                                                               | 2,076966741 | 7,82E-06 | 0,000123895 | 3,406407551 |
| ecotropic viral integration site 2a                                        | 0,379426945 | 7,90E-06 | 0,000124908 | 3,396305536 |
| toll-like receptor 4                                                       | 0,47256442  | 8,01E-06 | 0,000126523 | 3,382106126 |
| solute carrier family 22 (organic cation transporter), member 5            | 2,04323947  | 8,06E-06 | 0,000127226 | 3,375522022 |
| hematopoietic prostaglandin D synthase                                     | 0,480201344 | 8,23E-06 | 0,000129721 | 3,352856929 |
| RIKEN cDNA 2400003C14 gene                                                 | 2,152957368 | 8,25E-06 | 0,000129803 | 3,351401999 |
| glucosaminyl (N-acetyl) transferase 1, core 2                              | 0,477687457 | 8,27E-06 | 0,000130108 | 3,348150614 |
| toll-like receptor 8                                                       | 0,381810153 | 8,42E-06 | 0,000132173 | 3,329335988 |
| retinoblastoma 1                                                           | 0,481355668 | 8,58E-06 | 0,000134496 | 3,310360933 |
| 2'-5' oligoadenylate synthetase 1G                                         | 2,141364947 | 8,66E-06 | 0,000135525 | 3,300028344 |
| inhibitor of DNA binding 2                                                 | 2,887300555 | 8,71E-06 | 0,000136136 | 3,294541802 |
| solute carrier family 6 (neurotransmitter transporter, creatine), member 8 | 0,497558887 | 8,89E-06 | 0,00013859  | 3,272737457 |
| WNK lysine deficient protein kinase 1                                      | 2,21242538  | 8,92E-06 | 0,000138981 | 3,269003903 |
| signal transducer and activator of transcription 3                         | 2,036248984 | 9,12E-06 | 0,000141715 | 3,246319686 |
| CD37 antigen                                                               | 0,435819463 | 9,26E-06 | 0,000143517 | 3,230778338 |
| RAB10, member RAS oncogene family                                          | 2,095098517 | 9,29E-06 | 0,000144002 | 3,226471094 |
| DNA segment, Chr 14, ERATO Doi 668, expressed                              | 2,773289868 | 9,36E-06 | 0,000144623 | 3,219623288 |
| adenylate cyclase 7                                                        | 0,457823471 | 9,44E-06 | 0,000145744 | 3,21079017  |
| family with sequence similarity 89, member B                               | 0,48342881  | 9,49E-06 | 0,000146617 | 3,205060127 |
| fibronectin leucine rich transmembrane protein 2                           | 0,356409019 | 9,54E-06 | 0,000146921 | 3,199266859 |
| Rab interacting lysosomal protein                                          | 0,473848529 | 9,57E-06 | 0,000147053 | 3,195810508 |
| topoisomerase (DNA) I                                                      | 2,171449899 | 9,70E-06 | 0,00014885  | 3,181530924 |
| ATP-binding cassette, sub-family D (ALD), member 1                         | 0,46531068  | 1,08E-05 | 0,000162438 | 3,075376787 |
| zinc finger protein 524                                                    | 0,496384239 | 1,08E-05 | 0,000162438 | 3,070452754 |
| eukaryotic translation initiation factor 3, subunit C                      | 2,268690429 | 1,08E-05 | 0,000162837 | 3,066529733 |
| like-glycosyltransferase                                                   | 0,463734632 | 1,10E-05 | 0,000164128 | 3,055351519 |
| 5'-nucleotidase domain containing 2                                        | 0,385319488 | 1,11E-05 | 0,000166657 | 3,07026367  |
| DNA segment, Chr 6, Wayne State University 163, expressed                  | 0,475066492 | 1,13E-05 | 0,000168986 | 3,021041432 |
| RNA binding motif protein 11                                               | 2,161180072 | 1,14E-05 | 0,000169372 | 3,017147924 |
| integrin alpha L                                                           | 2,625844844 | 1,16E-05 | 0,000172714 | 2,992246227 |
| NAD(P)H dehydrogenase, quinone 1                                           | 0,48195257  | 1,21E-05 | 0,000178561 | 2,953029166 |
| thioredoxin interacting protein                                            | 0,461134786 | 1,21E-05 | 0,000178599 | 2,952057039 |
| carbohydrate (chondroitin 6/keratan) sulfotransferase 3                    | 2,007105968 | 1,21E-05 | 0,000178937 | 2,949338448 |
| casein kinase 1, delta                                                     | 2,167777832 | 1,23E-05 | 0,000180568 | 2,937635983 |
| calcium/calmodulin-dependent protein kinase I                              | 0,447374424 | 1,24E-05 | 0,000181975 | 2,925788287 |
| 2'-5' oligoadenylate synthetase 1G                                         | 2,242924263 | 1,25E-05 | 0,000183245 | 2,915861011 |
| myotubularin related protein 14                                            | 2,025908635 | 1,26E-05 | 0,000183974 | 2,909967407 |
| predicted gene 12250                                                       | 2,242670076 | 1,29E-05 | 0,000186748 | 2,888452461 |
| phosphodiesterase 4A, cAMP specific                                        | 2,405425135 | 1,31E-05 | 0,000189682 | 2,869262802 |
| lectin, galactoside-binding, soluble, 3 binding protein                    | 2,073482269 | 1,31E-05 | 0,000190175 | 2,865819097 |
| bicaudal D homolog 2 (Drosophila)                                          | 2,341124258 | 1,32E-05 | 0,000190475 | 2,861977583 |
| microtubule associated serine/threonine kinase family member 4             | 2,530783671 | 1,32E-05 | 0,000190685 | 2,860096623 |
| neurallized-like 2 (Drosophila)                                            | 0,480086997 | 1,36E-05 | 0,000196025 | 2,826196637 |
| kelch-like 25 (Drosophila)                                                 | 2,105104772 | 1,38E-05 | 0,000197386 | 2,817530359 |
| histocompatibility 2, O region beta locus                                  | 2,651645544 | 1,38E-05 | 0,000197527 | 2,816057295 |
| inositol (myo)-1(or 4)-monophosphatase 2                                   | 2,506939453 | 1,38E-05 | 0,000197983 | 2,812923813 |
| RIKEN cDNA 1110002B05 gene                                                 | 0,480974677 | 1,40E-05 | 0,000200267 | 2,799519621 |
| guanine nucleotide binding protein (G protein), gamma 11                   | 0,496619455 | 1,40E-05 | 0,00020046  | 2,79751053  |
| proline-serine-threonine phosphatase-interacting protein 1                 | 0,495264659 | 1,41E-05 | 0,000200697 | 2,794383626 |
| transmembrane protein 63a                                                  | 0,480780708 | 1,43E-05 | 0,000202748 | 2,780899263 |
| connective tissue growth factor                                            | 0,452616376 | 1,48E-05 | 0,00020917  | 2,744083868 |
| solute carrier family 5 (sodium-dependent vitamin transporter), member 6   | 0,49528875  | 1,64E-05 | 0,000228835 | 2,637608282 |
| syndecan 2                                                                 | 0,492734537 | 1,64E-05 | 0,000229589 | 2,632053429 |
| MAM domain containing 2                                                    | 0,488486922 | 1,65E-05 | 0,000229749 | 2,630617569 |
| stromal membrane-associated GTPase-activating protein 2                    | 2,010393855 | 1,71E-05 | 0,000237473 | 2,591228286 |
| 2'-5' oligoadenylate synthetase-like 2                                     | 2,310914994 | 1,74E-05 | 0,000240701 | 2,574353    |
| RNA binding protein gene with multiple splicing                            | 2,00640203  | 1,87E-05 | 0,000255771 | 2,499227755 |
| FERM domain containing 6                                                   | 2,62178155  | 1,88E-05 | 0,000257428 | 2,491808891 |
| acid phosphatase 5, tartrate resistant                                     | 2,33810155  | 1,88E-05 | 0,000257465 | 2,490963544 |
| plasminogen activator, urokinase receptor                                  | 0,495422764 | 1,91E-05 | 0,0002606   | 2,477668469 |
| RIKEN cDNA 2010106G01 gene                                                 | 2,183939141 | 1,91E-05 | 0,000260627 | 2,47686485  |
| colony stimulating factor 3 (granulocyte)                                  | 2,015437932 | 1,91E-05 | 0,000261193 | 2,473915281 |
| phosphatidylinositol glycan anchor biosynthesis, class Z                   | 0,455838533 | 1,99E-05 | 0,000269329 | 2,434387272 |
| alcohol dehydrogenase 4 (class II), pi polypeptide                         | 2,001808521 | 2,01E-05 | 0,000272448 | 2,421025775 |
| sushi-repeat-containing protein, X-linked 2                                | 0,450183998 | 2,03E-05 | 0,000274717 | 2,411016553 |
| ATP synthase, H+ transporting, mitochondrial F1 complex, epsilon subunit   | 2,143577652 | 2,09E-05 | 0,000281479 | 2,381595702 |

|                                                                                                 |             |             |             |             |
|-------------------------------------------------------------------------------------------------|-------------|-------------|-------------|-------------|
| DNA segment, Chr 6, Miriam Meisler 5, expressed                                                 | 2,485752718 | 2,11E-05    | 0,000283108 | 2,374222647 |
| phosphoglucosyltransferase 2                                                                    | 2,476837663 | 2,11E-05    | 0,000283209 | 2,373173273 |
| glutamate oxaloacetate transaminase 1, soluble                                                  | 2,016131094 | 2,12E-05    | 0,000284771 | 2,366083861 |
| EF-hand calcium binding domain 4A                                                               | 0,490036855 | 2,14E-05    | 0,000286143 | 2,359718832 |
| dystonin                                                                                        | 2,245211943 | 2,15E-05    | 0,000287395 | 2,353137594 |
| ATPase type 13A4                                                                                | 2,328827534 | 2,15E-05    | 0,000287687 | 2,351404128 |
| triosephosphate isomerase 1                                                                     | 2,00954129  | 2,16E-05    | 0,000288307 | 2,348484434 |
| tetraspanin 32                                                                                  | 0,415396613 | 2,17E-05    | 0,00028933  | 2,342769309 |
| acyl-CoA synthetase long-chain family member 4                                                  | 2,10984499  | 2,19E-05    | 0,000292235 | 2,331692083 |
| latent transforming growth factor beta binding protein 1                                        | 2,125730689 | 2,20E-05    | 0,000293268 | 2,327346182 |
| La ribonucleoprotein domain family, member 1B                                                   | 2,145177385 | 2,28E-05    | 0,000301435 | 2,292026248 |
| thymidylate synthase                                                                            | 2,868845489 | 2,29E-05    | 0,00030208  | 2,288459736 |
| proteasome (prosome, macropain) 28 subunit, beta                                                | 2,116148603 | 2,34E-05    | 0,000307149 | 2,265797463 |
| membrane bound O-acyltransferase domain containing 1                                            | 0,457928373 | 2,38E-05    | 0,000311725 | 2,247743574 |
| ryanodine receptor 1, skeletal muscle                                                           | 0,495384443 | 2,40E-05    | 0,000313957 | 2,238988661 |
| family with sequence similarity 102, member B                                                   | 2,178067599 | 2,41E-05    | 0,000314809 | 2,234180667 |
| NAD(P)H dehydrogenase, quinone 2                                                                | 0,496796179 | 2,45E-05    | 0,000318701 | 2,216766921 |
| ral guanine nucleotide dissociation stimulator-like 2                                           | 0,466425911 | 2,55E-05    | 0,000329046 | 2,176259468 |
| putative transposase element L1Md-A101/L1Md-A102/L1Md-A2-like                                   | 0,436676866 | 2,56E-05    | 0,000330277 | 2,171753916 |
| NIMA (never in mitosis gene a)-related expressed kinase 8                                       | 2,196306904 | 2,58E-05    | 0,000332616 | 2,161144731 |
| DEAD (Asp-Glu-Ala-Asp) box polypeptide 19b                                                      | 2,009315961 | 2,63E-05    | 0,000336885 | 2,1446211   |
| eukaryotic translation elongation factor 1 alpha 2                                              | 0,445333725 | 2,64E-05    | 0,000338951 | 2,137606882 |
| tumor-associated calcium signal transducer 2                                                    | 2,076054074 | 2,70E-05    | 0,000345962 | 2,113710321 |
| sine oculis-binding protein homolog (Drosophila)                                                | 0,453779009 | 2,85E-05    | 0,00036177  | 2,060765871 |
| cytohesin 4                                                                                     | 0,464725338 | 2,86E-05    | 0,000362699 | 2,056810173 |
| vestigial like 4 (Drosophila)                                                                   | 2,068956521 | 3,00E-05    | 0,000377416 | 2,005196518 |
| adhesion molecule, interacts with CXADR antigen 1                                               | 0,435879785 | 3,40E-05    | 0,000420771 | 1,87631096  |
| ninjurin 1                                                                                      | 0,485602227 | 3,50E-05    | 0,000431645 | 1,846028591 |
| RIKEN cDNA 4930539E08 gene                                                                      | 2,498165191 | 3,54E-05    | 0,000435356 | 1,834009014 |
| eukaryotic translation elongation factor 1 alpha 2                                              | 0,455022324 | 3,72E-05    | 0,000454354 | 1,782159865 |
| collagen, type VI, alpha 3                                                                      | 0,469519421 | 3,87E-05    | 0,000470023 | 1,741984587 |
| DNA segment, Chr 3, Brigham & Women's Genetics 0562 expressed                                   | 2,079202296 | 3,94E-05    | 0,000477295 | 1,723569238 |
| PRELI domain containing 2                                                                       | 2,310654754 | 3,99E-05    | 0,000483009 | 1,709974002 |
| trimethylguanosine synthase homolog (S. cerevisiae)                                             | 2,023379876 | 4,05E-05    | 0,000490311 | 1,692544394 |
| SKI-like                                                                                        | 2,323004382 | 4,12E-05    | 0,000497628 | 1,675316242 |
| thioredoxin 1                                                                                   | 2,240876758 | 4,37E-05    | 0,000521722 | 1,615856542 |
| macrophage migration inhibitory factor                                                          | 2,244692687 | 4,39E-05    | 0,000523204 | 1,611097637 |
| casein kinase 2, alpha 1 polypeptide                                                            | 2,33204827  | 4,62E-05    | 0,000545496 | 1,57078586  |
| squalene epoxidase                                                                              | 2,060318672 | 5,20E-05    | 0,000603021 | 1,433974145 |
| transcobalamin 2                                                                                | 2,382108963 | 5,26E-05    | 0,000608181 | 1,422119836 |
| RIKEN cDNA 2510003E04 gene                                                                      | 2,0218127   | 5,29E-05    | 0,000611387 | 1,415492568 |
| phosphate cytidyltransferase 1, choline, alpha isoform                                          | 2,133957236 | 5,42E-05    | 0,000622759 | 1,392032426 |
| polyadenylate-binding protein-interacting protein 2                                             | 2,014939996 | 5,59E-05    | 0,000638945 | 1,359844021 |
| ArfGAP with RhoGAP domain, ankyrin repeat and PH domain 2                                       | 2,166901806 | 5,64E-05    | 0,000644599 | 1,349543848 |
| BCL2-like 11 (apoptosis facilitator)                                                            | 2,061141199 | 5,91E-05    | 0,000669515 | 1,30155403  |
| zinc finger, DHHC domain containing 3                                                           | 0,425743393 | 5,94E-05    | 0,000672029 | 1,296518993 |
| eosinophil-associated, ribonuclease A family, member 11                                         | 0,469618037 | 6,22E-05    | 0,000699554 | 1,248588775 |
| ring finger protein 34                                                                          | 2,132289322 | 6,38E-05    | 0,000713183 | 1,221769725 |
| arginase, liver                                                                                 | 3,616368225 | 6,47E-05    | 0,000721445 | 1,20733709  |
| wingless-related MMTV integration site 6                                                        | 2,139134955 | 6,98E-05    | 0,000770597 | 1,129272134 |
| cyclin D1                                                                                       | 0,491697851 | 7,15E-05    | 0,000784657 | 1,104229534 |
| phosphodiesterase 4B, cAMP specific                                                             | 2,005897686 | 7,16E-05    | 0,00078576  | 1,102218881 |
| RIKEN cDNA 0610010O12 gene                                                                      | 2,104796769 | 7,43E-05    | 0,000810322 | 1,06422053  |
| heparanase                                                                                      | 0,459303227 | 7,52E-05    | 0,000818942 | 1,05104712  |
| Mid1 interacting protein 1 (gastrulation specific G12-like (zebrafish))                         | 0,495506106 | 7,80E-05    | 0,000841771 | 1,013444528 |
| cell division cycle 20 homolog (S. cerevisiae)                                                  | 0,475640878 | 8,37E-05    | 0,000892311 | 0,940348025 |
| kinectin 1                                                                                      | 2,224403308 | 8,44E-05    | 0,000896966 | 0,932233952 |
| torsin A interacting protein 2                                                                  | 2,04773142  | 8,44E-05    | 0,000896966 | 0,931732593 |
| histocompatibility 2, D region locus 1                                                          | 2,008253748 | 8,68E-05    | 0,000918043 | 0,902997674 |
| predicted pseudogene 16379                                                                      | 2,557602522 | 9,08E-05    | 0,000952056 | 0,855827936 |
| procollagen-proline, 2-oxoglutarate 4-dioxygenase (proline 4-hydroxylase), alpha II polypeptide | 2,412176818 | 9,32E-05    | 0,00097246  | 0,829463275 |
| cyclin-dependent kinase-like 2 (CDC2-related kinase)                                            | 0,468812406 | 0,000102329 | 0,00105165  | 0,732118277 |
| ADP-ribosylation factor-like 5C                                                                 | 2,080861805 | 0,000103618 | 0,00106171  | 0,719155536 |
| dual specificity phosphatase 2                                                                  | 2,160697928 | 0,00010698  | 0,00109398  | 0,686088093 |
| tetraspanin 2                                                                                   | 2,060030739 | 0,000110216 | 0,001120372 | 0,655242738 |
| zinc ribbon domain containing, 1                                                                | 2,104655099 | 0,000112409 | 0,001138159 | 0,634847036 |
| cadherin-like 26                                                                                | 2,190312873 | 0,000123222 | 0,00123186  | 0,53979215  |
| FYVE, RhoGEF and PH domain containing 4                                                         | 0,491826023 | 0,000137464 | 0,00134543  | 0,426652038 |
| integrin alpha M                                                                                | 0,464538733 | 0,000138659 | 0,001355187 | 0,417702501 |
| activated leukocyte cell adhesion molecule                                                      | 2,147231812 | 0,00014729  | 0,001424682 | 0,355261992 |
| non-POU-domain-containing, octamer binding protein                                              | 2,260203429 | 0,000158538 | 0,001511368 | 0,279201637 |
| ubiquitin protein ligase E3A                                                                    | 2,180587143 | 0,000163876 | 0,001557197 | 0,24498261  |
| SH3 domain binding glutamic acid-rich protein like 2                                            | 2,541630384 | 0,000164587 | 0,001561786 | 0,240509469 |
| TWIST neighbor                                                                                  | 2,085369969 | 0,000193395 | 0,00179254  | 0,073925513 |
| lectin, galactose binding, soluble 9                                                            | 2,087302624 | 0,000200527 | 0,001849029 | 0,036543767 |
| zinc finger CCCH type, antiviral 1                                                              | 2,123660863 | 0,000201937 | 0,001858687 | 0,029315544 |
| solute carrier family 16 (monocarboxylic acid transporters), member 10                          | 0,488710121 | 0,000250437 | 0,002208143 | -0,19269986 |
| toll-like receptor 13                                                                           | 0,429477471 | 0,00025568  | 0,002239955 | -0,21405691 |
| succinate dehydrogenase complex, subunit D, integral membrane protein                           | 2,088049872 | 0,000260543 | 0,00227383  | -0,23347362 |
| tripartite motif-containing 35                                                                  | 2,025067513 | 0,000264311 | 0,002302803 | -0,24827056 |
| karyopherin (importin) alpha 3                                                                  | 2,167914705 | 0,000283526 | 0,002444294 | -0,32056575 |

|                                                                 |             |             |             |             |
|-----------------------------------------------------------------|-------------|-------------|-------------|-------------|
| general transcription factor II E, polypeptide 2 (beta subunit) | 2,507152555 | 0,000297707 | 0,002549431 | -0,37082663 |
| synuclein, alpha                                                | 2,033645218 | 0,000302101 | 0,002581681 | -0,3859128  |
| WNK lysine deficient protein kinase 1                           | 2,246842144 | 0,000331657 | 0,002790158 | -0,4819835  |
| glyoxylate reductase/hydroxypyruvate reductase                  | 2,220778039 | 0,000347218 | 0,002897336 | -0,52915314 |
| V-set and immunoglobulin domain containing 8                    | 0,489673944 | 0,00044225  | 0,003512015 | -0,77779065 |
| small nuclear RNA activating complex, polypeptide 1             | 2,002178993 | 0,000477999 | 0,003720045 | -0,85759057 |
| KDM1 lysine (K)-specific demethylase 6B                         | 2,061085824 | 0,000479051 | 0,003722248 | -0,85984578 |
| RIKEN cDNA 4930583H14 gene                                      | 5,623925182 | 0,000558355 | 0,004211873 | -1,01696525 |
| Ngfi-A binding protein 1                                        | 2,281163279 | 0,000663204 | 0,004859151 | -1,19324006 |
| heterogeneous nuclear ribonucleoprotein D-like                  | 2,002009616 | 0,00068889  | 0,005011526 | -1,23213041 |
| actin, beta                                                     | 0,408303556 | 0,000738645 | 0,005305847 | -1,30346939 |
| eukaryotic translation initiation factor 2C, 3                  | 2,070366958 | 0,000944707 | 0,00645644  | -1,55482907 |
| Treacher Collins Franceschetti syndrome 1, homolog              | 2,115805084 | 0,001066456 | 0,007122649 | -1,67845063 |
| serum amyloid A 1                                               | 2,43651091  | 0,003019045 | 0,016460525 | -2,73287466 |

**Panel 3: Genes significantly up-regulated in *Porphyromonas gingivalis* treated DCs (FDR < 0.05), regulated in response to *Aggregatibacter actinomycetemcomitans* challenge.**

| Name                                                                                | FC Pg       | AveExpr     | F           | P.Value  | adj.P.Val   |
|-------------------------------------------------------------------------------------|-------------|-------------|-------------|----------|-------------|
| DNA (cytosine-5-)-methyltransferase 3-like                                          | 5,768516159 | 7,847368332 | 268,1919869 | 1,13E-11 | 1,90E-09    |
| hydroxysteroid 11-beta dehydrogenase 1                                              | 5,075092117 | 5,476428415 | 246,9239308 | 1,96E-11 | 1,90E-09    |
| lymphocyte antigen 6 complex, locus C1                                              | 7,480830062 | 8,695608966 | 232,2896102 | 2,94E-11 | 1,90E-09    |
| solute carrier family 6 (neurotransmitter transporter, glycine), member 9           | 4,993567629 | 6,683270371 | 181,6602073 | 1,49E-10 | 7,23E-09    |
| EGF-like module containing, mucin-like, hormone receptor-like sequence 1            | 4,306348074 | 6,850985198 | 137,6972703 | 9,11E-10 | 3,53E-08    |
| microsomal glutathione S-transferase 2                                              | 3,743812957 | 8,480569512 | 124,0719644 | 1,79E-09 | 5,79E-08    |
| C-type lectin domain family 4, member a1                                            | 3,197796843 | 7,426596244 | 116,4773046 | 2,69E-09 | 7,45E-08    |
| solute carrier family 39 (zinc transporter), member 4                               | 3,418824034 | 7,581196166 | 101,6957104 | 6,42E-09 | 1,53E-07    |
| hydroxysteroid 11-beta dehydrogenase 1                                              | 5,805384884 | 5,842653483 | 99,0234844  | 7,61E-09 | 1,53E-07    |
| hydroxysteroid 11-beta dehydrogenase 1                                              | 4,580437061 | 5,458520803 | 98,4861086  | 7,88E-09 | 1,53E-07    |
| RIKEN cDNA 1810033B17 gene                                                          | 3,121604722 | 8,890256605 | 96,60987965 | 8,91E-09 | 1,57E-07    |
| platelet factor 4                                                                   | 2,543837694 | 10,08192974 | 93,4561894  | 1,10E-08 | 1,78E-07    |
| artemin                                                                             | 3,783304907 | 5,861698783 | 89,20981894 | 1,48E-08 | 2,20E-07    |
| calreticulin 3                                                                      | 2,271128599 | 4,861731297 | 74,15585984 | 4,72E-08 | 6,54E-07    |
| deafness, autosomal dominant 5 (human)                                              | 3,027731494 | 6,309689363 | 71,53069411 | 5,91E-08 | 7,56E-07    |
| ATP-binding cassette, sub-family B (MDR/TAP), member 4                              | 5,593744739 | 5,757069273 | 70,92260455 | 6,24E-08 | 7,56E-07    |
| sulfide quinone reductase-like (yeast)                                              | 3,242484538 | 7,258735144 | 69,72687112 | 6,93E-08 | 7,91E-07    |
| G protein-coupled receptor 155                                                      | 2,810832901 | 5,28095978  | 62,92769856 | 1,31E-07 | 1,41E-06    |
| heat-responsive protein 12                                                          | 2,27425396  | 7,559279908 | 58,48257578 | 2,05E-07 | 1,99E-06    |
| artemin                                                                             | 3,197962262 | 5,345585751 | 58,47539703 | 2,05E-07 | 1,99E-06    |
| mucolipin 2                                                                         | 2,241606914 | 7,550277902 | 55,21225539 | 2,90E-07 | 2,68E-06    |
| solute carrier family 7 (cationic amino acid transporter, y+ system), member 11     | 2,645295643 | 9,735697712 | 54,31216998 | 3,21E-07 | 2,83E-06    |
| matrix metalloproteinase 9                                                          | 2,328640786 | 7,084150434 | 52,65973031 | 3,87E-07 | 3,26E-06    |
| heat-responsive protein 12                                                          | 2,142088304 | 7,161801997 | 48,36197454 | 6,45E-07 | 5,21E-06    |
| keratin 17                                                                          | 3,215876287 | 5,441473635 | 47,65531753 | 7,04E-07 | 5,46E-06    |
| solute carrier family 11 (proton-coupled divalent metal ion transporters), member 1 | 1,851804832 | 9,30353673  | 46,698433   | 7,95E-07 | 5,93E-06    |
| RIKEN cDNA D330045A20 gene                                                          | 2,165022265 | 4,951786556 | 46,19991497 | 8,47E-07 | 6,09E-06    |
| bone marrow stromal cell antigen 1                                                  | 2,593719366 | 6,731233388 | 45,48140926 | 9,29E-07 | 6,32E-06    |
| matrix metalloproteinase 2                                                          | 4,232992691 | 7,044452427 | 45,32498375 | 9,49E-07 | 6,32E-06    |
| malic enzyme 1, NADP(+)-dependent, cytosolic                                        | 2,168150095 | 6,226301596 | 45,09719273 | 9,77E-07 | 6,32E-06    |
| serine (or cysteine) peptidase inhibitor, clade B (ovalbumin), member 12            | 2,110092113 | 4,901913509 | 44,73231354 | 1,03E-06 | 6,42E-06    |
| sodium channel, voltage-gated, type XI, alpha                                       | 1,926966339 | 4,803847365 | 43,41878091 | 1,22E-06 | 7,41E-06    |
| leukotriene B4 receptor 1                                                           | 2,271612557 | 6,056444573 | 42,5226005  | 1,38E-06 | 8,13E-06    |
| RIKEN cDNA 1100001G20 gene                                                          | 2,507491909 | 4,908997911 | 42,15199165 | 1,46E-06 | 8,30E-06    |
| G protein-coupled receptor 176                                                      | 1,909534541 | 7,170081706 | 41,73632283 | 1,54E-06 | 8,55E-06    |
| toll-like receptor 1                                                                | 2,313549038 | 6,718655348 | 38,3790955  | 2,51E-06 | 1,35E-05    |
| family with sequence similarity 181, member B                                       | 2,089782016 | 4,764071005 | 38,18511857 | 2,59E-06 | 1,36E-05    |
| triggering receptor expressed on myeloid cells-like 4                               | 2,432878628 | 5,579159631 | 36,96791625 | 3,12E-06 | 1,58E-05    |
| CD1d1 antigen                                                                       | 2,182436307 | 8,650470428 | 36,85923564 | 3,17E-06 | 1,58E-05    |
| solute carrier family 39 (zinc transporter), member 4                               | 1,8082835   | 4,874598206 | 36,52653573 | 3,34E-06 | 1,62E-05    |
| Ras association (RalGDS/AF-6) domain family member 4                                | 2,539751755 | 7,734316971 | 34,60807094 | 4,55E-06 | 2,15E-05    |
| transforming growth factor, beta induced                                            | 1,684246947 | 7,195993855 | 33,79017671 | 5,21E-06 | 2,41E-05    |
| serine (or cysteine) peptidase inhibitor, clade B (ovalbumin), member 12            | 2,502615248 | 5,013096449 | 33,58526908 | 5,40E-06 | 2,44E-05    |
| RIKEN cDNA D330045A20 gene                                                          | 1,692387511 | 4,946570183 | 32,18405746 | 6,87E-06 | 3,03E-05    |
| pannexin 1                                                                          | 1,790957419 | 7,063596604 | 31,95899503 | 7,14E-06 | 3,08E-05    |
| transforming growth factor, beta induced                                            | 1,578317333 | 10,34751198 | 29,96425157 | 1,02E-05 | 4,25E-05    |
| guanylate binding protein 1                                                         | 1,854524155 | 5,084307792 | 29,93241025 | 1,03E-05 | 4,25E-05    |
| esterase D/formylglutathione hydrolase                                              | 1,578877656 | 7,870393519 | 29,19550351 | 1,18E-05 | 4,75E-05    |
| dual specificity phosphatase 6                                                      | 1,638854997 | 7,637455573 | 29,11524073 | 1,20E-05 | 4,75E-05    |
| solute carrier family 11 (proton-coupled divalent metal ion transporters), member 1 | 1,678468006 | 13,41239181 | 28,87742955 | 1,26E-05 | 4,87E-05    |
| galanin                                                                             | 2,394515448 | 5,093415468 | 28,34692838 | 1,39E-05 | 5,29E-05    |
| glutathione S-transferase, mu 1                                                     | 2,210919748 | 9,402422656 | 28,02657153 | 1,48E-05 | 5,52E-05    |
| teashirt zinc finger family member 1                                                | 1,820262029 | 7,682542206 | 27,83625194 | 1,54E-05 | 5,62E-05    |
| caveolin 2                                                                          | 1,961954088 | 7,065466388 | 27,18556646 | 1,75E-05 | 6,28E-05    |
| predicted gene 885                                                                  | 1,730880083 | 7,543535158 | 25,74724385 | 2,35E-05 | 8,28E-05    |
| PTPRF interacting protein, binding protein 2 (liprin beta 2)                        | 1,770917239 | 9,081370159 | 24,22260523 | 3,26E-05 | 0,000112769 |
| glutathione reductase                                                               | 1,459142913 | 8,576557877 | 23,82738663 | 3,55E-05 | 0,000120903 |
| RIKEN cDNA 9130230L23 gene                                                          | 2,032577917 | 6,020575372 | 22,89356259 | 4,39E-05 | 0,000146721 |
| calreticulin 3                                                                      | 2,115255173 | 5,011159272 | 21,40355706 | 6,23E-05 | 0,000204822 |
| cytochrome b-5                                                                      | 1,762345927 | 10,05381774 | 20,88883116 | 7,06E-05 | 0,000228333 |
| glutathione synthetase                                                              | 2,185428037 | 5,891257076 | 20,79310174 | 7,23E-05 | 0,000229951 |
| solute carrier family 7 (cationic amino acid transporter, y+ system), member 11     | 1,623999128 | 10,58387047 | 20,42269618 | 7,93E-05 | 0,000248059 |
| ubiquitin-conjugating enzyme E2E 2 (UBC4/5 homolog, yeast)                          | 1,73639876  | 8,377976611 | 20,04125846 | 8,73E-05 | 0,000268752 |

|                                                                                     |             |             |             |             |             |
|-------------------------------------------------------------------------------------|-------------|-------------|-------------|-------------|-------------|
| FYN binding protein                                                                 | 1,441494941 | 8,663466395 | 19,87011032 | 9,12E-05    | 0,000275129 |
| UDP glucuronosyltransferase 1 family, polypeptide A7C                               | 1,56346208  | 7,981413424 | 19,82656686 | 9,22E-05    | 0,000275129 |
| LY6/PLAUR domain containing 6B                                                      | 1,613443534 | 4,778577264 | 19,35666318 | 0,000104069 | 0,000303059 |
| RIKEN cDNA 9130230L23 gene                                                          | 1,88502401  | 5,874014534 | 19,07120081 | 0,000112146 | 0,000323893 |
| integrin beta 2-like                                                                | 1,824927703 | 5,948259087 | 18,98093771 | 0,000114848 | 0,000323893 |
| transmembrane protein 119                                                           | 1,707882489 | 5,104199085 | 18,95870167 | 0,000115525 | 0,000323893 |
| layilin                                                                             | 1,673661443 | 4,78329671  | 18,89476349 | 0,000117498 | 0,000323893 |
| POU domain, class 2, transcription factor 2                                         | 2,079982272 | 5,144287653 | 18,8615265  | 0,000118538 | 0,000323893 |
| glutathione synthetase                                                              | 1,680279964 | 5,503512471 | 18,31101871 | 0,000137408 | 0,000370237 |
| free fatty acid receptor 2                                                          | 1,57661373  | 4,737759115 | 17,87823722 | 0,000154682 | 0,000408238 |
| peroxisomal membrane protein 2                                                      | 1,860097374 | 6,019752423 | 17,8540179  | 0,00015572  | 0,000408238 |
| acyloxyacyl hydrolase                                                               | 1,810117263 | 7,803623966 | 17,55003315 | 0,000169451 | 0,000438314 |
| NADPH oxidase organizer 1                                                           | 1,564125413 | 6,135490235 | 17,34296101 | 0,000179601 | 0,000458455 |
| polo-like kinase 3 (Drosophila)                                                     | 1,487880761 | 6,88009145  | 17,20624633 | 0,000186684 | 0,000470347 |
| RAS protein-specific guanine nucleotide-releasing factor 1                          | 1,851488567 | 4,89312195  | 17,02729803 | 0,000196445 | 0,000488593 |
| solute carrier family 25, member 37                                                 | 1,938672064 | 7,026787841 | 16,95470927 | 0,00020057  | 0,000492539 |
| RIKEN cDNA 2210408F21 gene                                                          | 1,874377293 | 7,581194638 | 16,87003708 | 0,000205508 | 0,000498357 |
| glutathione synthetase                                                              | 1,587185397 | 6,011384751 | 16,71065697 | 0,000215186 | 0,000515384 |
| N-acyl phosphatidylethanolamine phospholipase D                                     | 1,739999688 | 5,617160695 | 16,66475181 | 0,00021807  | 0,000515921 |
| membrane-spanning 4-domains, subfamily A, member 7                                  | 2,502246152 | 6,174202193 | 16,43349649 | 0,000233289 | 0,000545277 |
| PTPRF interacting protein, binding protein 2 (liprin beta 2)                        | 1,689128078 | 7,570152423 | 16,34627506 | 0,000239342 | 0,000552767 |
| UDP glucuronosyltransferase 1 family, polypeptide A6A                               | 1,915785069 | 5,015135603 | 15,5546092  | 0,000303363 | 0,000684436 |
| proline-serine-threonine phosphatase-interacting protein 2                          | 2,306094157 | 5,568175239 | 15,54024031 | 0,000304694 | 0,000684436 |
| RNA binding protein, fox-1 homolog (C. elegans) 2                                   | 1,464929025 | 4,969328399 | 15,51619294 | 0,000306938 | 0,000684436 |
| oxidative stress induced growth inhibitor 1                                         | 1,53193918  | 5,381728512 | 15,44747039 | 0,000313454 | 0,000691023 |
| arachidonate 12-lipoxygenase                                                        | 1,642845479 | 4,95127836  | 15,38878743 | 0,000319144 | 0,000695661 |
| coagulation factor IX                                                               | 1,702312561 | 5,250796159 | 15,31957252 | 0,000326007 | 0,000702727 |
| oxysterol binding protein-like 3                                                    | 1,4550472   | 8,978512591 | 15,245952   | 0,000333495 | 0,000710967 |
| UFM1-specific peptidase 2                                                           | 1,525560107 | 9,110996225 | 15,18203003 | 0,000340156 | 0,000717285 |
| nicotinamide phosphoribosyltransferase                                              | 2,290008836 | 6,19026544  | 15,13122189 | 0,000345559 | 0,000720844 |
| UFM1-specific peptidase 2                                                           | 1,604908595 | 6,645919121 | 15,06682677 | 0,00035255  | 0,000727603 |
| RIKEN cDNA 2610034B18 gene                                                          | 1,618914905 | 5,248519221 | 14,57176139 | 0,000412058 | 0,000834169 |
| alpha fetoprotein                                                                   | 1,62645546  | 4,690563997 | 14,56623148 | 0,000412784 | 0,000834169 |
| tubulin folding cofactor E-like                                                     | 1,477836582 | 8,943495759 | 14,49880702 | 0,000421767 | 0,000843533 |
| transmembrane anterior posterior transformation 1                                   | 1,660020909 | 9,340500624 | 14,45879599 | 0,000427203 | 0,000845687 |
| UFM1-specific peptidase 2                                                           | 1,55791811  | 8,438313832 | 13,72212028 | 0,000543187 | 0,001064427 |
| centrosomal protein 55                                                              | 1,410178118 | 4,744586998 | 13,65643285 | 0,000555178 | 0,001071533 |
| muscle and microspikes RAS                                                          | 1,641003334 | 7,486656341 | 13,61984709 | 0,000561988 | 0,001071533 |
| monoamine oxidase B                                                                 | 1,943977276 | 5,161981414 | 13,60885014 | 0,000564053 | 0,001071533 |
| toll-like receptor adaptor molecule 2                                               | 1,517735659 | 7,209777882 | 13,56547036 | 0,000572287 | 0,001071533 |
| ATP-binding cassette, sub-family C (CFTR/MRP), member 5                             | 1,484348168 | 8,849403694 | 13,55429502 | 0,00057443  | 0,001071533 |
| membrane-spanning 4-domains, subfamily A, member 6C                                 | 1,770924867 | 4,780944164 | 13,31630113 | 0,000622336 | 0,001149884 |
| olfactory receptor 360                                                              | 1,554396254 | 4,74662551  | 13,10988313 | 0,000667624 | 0,001221877 |
| artemin                                                                             | 1,458057206 | 4,703679049 | 12,9488209  | 0,000705596 | 0,001277709 |
| post-GPI attachment to proteins 2                                                   | 1,481919511 | 8,446974988 | 12,92547812 | 0,000711302 | 0,001277709 |
| family with sequence similarity 114, member A1                                      | 1,657731706 | 5,573550021 | 12,87511835 | 0,000723793 | 0,001288219 |
| zinc finger, DHHC domain containing 6                                               | 1,511789095 | 10,51629581 | 12,84849823 | 0,000730498 | 0,001288333 |
| SUB1 homolog (S. cerevisiae)                                                        | 1,580057849 | 6,011690708 | 12,46153201 | 0,00083647  | 0,001456749 |
| Fc receptor, IgE, high affinity I, gamma polypeptide                                | 1,477810474 | 13,58621433 | 12,44622935 | 0,000841009 | 0,001456749 |
| growth arrest specific 7                                                            | 1,592968191 | 7,865539323 | 12,41035383 | 0,000851764 | 0,00146232  |
| NIMA (never in mitosis gene a)-related expressed kinase 3                           | 1,375511488 | 4,990551088 | 12,37576304 | 0,000862283 | 0,001467393 |
| synuclein, alpha                                                                    | 1,659312203 | 4,77511329  | 12,13420699 | 0,000940034 | 0,001585796 |
| WD repeat domain, phosphoinositide interacting 1                                    | 1,623190674 | 6,348469711 | 12,03884505 | 0,00097292  | 0,001621448 |
| Notch gene homolog 1 (Drosophila)                                                   | 1,683459576 | 6,296664588 | 12,0247724  | 0,000977884 | 0,001621448 |
| RIKEN cDNA 1110008P14 gene                                                          | 1,562952112 | 9,772110256 | 11,91675008 | 0,001016969 | 0,001671965 |
| kynureninase (L-kynurenine hydrolase)                                               | 1,33866907  | 9,789568407 | 11,84177136 | 0,001045152 | 0,001703861 |
| pseudouridylate synthase 10                                                         | 1,478544808 | 6,913826631 | 11,6084574  | 0,001138751 | 0,001840981 |
| heterogeneous nuclear ribonucleoprotein L-like                                      | 1,60480465  | 7,087930506 | 11,44946883 | 0,001208045 | 0,001933855 |
| DIRAS family, GTP-binding RAS-like 2                                                | 1,479522394 | 8,783548006 | 11,43158939 | 0,001216136 | 0,001933855 |
| angiotensin II, type I receptor-associated protein                                  | 1,475132178 | 9,033511175 | 11,12449706 | 0,001365282 | 0,002153371 |
| malic enzyme 1, NADP(+)-dependent, cytosolic                                        | 1,701646771 | 5,452960911 | 11,03595972 | 0,001412104 | 0,00220926  |
| hephaestin                                                                          | 1,384526646 | 4,71028741  | 11,01429275 | 0,001423842 | 0,002209802 |
| acyl-CoA synthetase long-chain family member 5                                      | 1,497956922 | 12,09455231 | 10,90830087 | 0,001482896 | 0,002283188 |
| glutathione S-transferase, mu 6                                                     | 1,409241417 | 4,706540504 | 10,69436659 | 0,001610856 | 0,002460678 |
| predicted gene 885                                                                  | 1,539381283 | 6,421899847 | 10,60542953 | 0,001667746 | 0,002527678 |
| RIKEN cDNA 2700094K13 gene                                                          | 1,406274418 | 7,82973832  | 10,50759625 | 0,001733005 | 0,002606225 |
| RIKEN cDNA A730020E08 gene                                                          | 1,494484308 | 4,974178069 | 10,44393274 | 0,001777044 | 0,002650762 |
| RIKEN cDNA 9930023K05 gene                                                          | 1,488069593 | 9,984557968 | 10,42562162 | 0,001789947 | 0,002650762 |
| demethyl-Q 7                                                                        | 1,493565626 | 6,989312768 | 10,269077   | 0,001904756 | 0,002793243 |
| phosphatidic acid phosphatase type 2A                                               | 2,45318236  | 5,081178271 | 10,25569547 | 0,001914955 | 0,002793243 |
| intraflagellar transport 172 homolog (Chlamydomonas)                                | 1,540193628 | 6,615587102 | 9,991439649 | 0,002129792 | 0,00308343  |
| golgi integral membrane protein 4                                                   | 1,617897977 | 6,025076215 | 9,91441742  | 0,002197523 | 0,003157922 |
| solute carrier family 11 (proton-coupled divalent metal ion transporters), member 2 | 1,748348997 | 6,179040828 | 9,813935801 | 0,00228963  | 0,003266089 |
| tumor necrosis factor receptor superfamily, member 1b                               | 1,464545872 | 8,481729537 | 9,714224167 | 0,002385433 | 0,003377913 |
| cathelicidin antimicrobial peptide                                                  | 1,78052245  | 4,824600764 | 9,574534252 | 0,002527483 | 0,003553128 |
| progesterone receptor membrane component 1                                          | 1,62281102  | 6,709410699 | 9,524409282 | 0,002580802 | 0,003601982 |
| leucine rich repeat containing 59                                                   | 2,058249188 | 6,671312538 | 9,493312237 | 0,002614528 | 0,003611954 |
| sequestosome 1                                                                      | 1,41668512  | 12,37732369 | 9,4835837   | 0,002625183 | 0,003611954 |
| nuclear factor of kappa light polypeptide gene enhancer in B-cells inhibitor, beta  | 1,499868996 | 7,735094358 | 9,439595204 | 0,002673985 | 0,003653191 |
| molybdenum cofactor synthesis 1                                                     | 1,484246344 | 9,418232806 | 9,316330333 | 0,002816377 | 0,00382082  |
| signal peptidase complex subunit 3 homolog (S. cerevisiae)                          | 1,449949705 | 7,763916287 | 9,126050948 | 0,003053604 | 0,004113883 |



|                                                                       |             |             |             |             |             |
|-----------------------------------------------------------------------|-------------|-------------|-------------|-------------|-------------|
| neurofilament, medium polypeptide                                     | 1,553643606 | 4,836476289 | 8,96912625  | 0,003266591 | 0,004369833 |
| cleavage stimulation factor, 3' pre-RNA, subunit 3                    | 1,56590033  | 7,786600306 | 8,95356797  | 0,003288637 | 0,004369833 |
| versican                                                              | 2,00459778  | 5,385944184 | 8,722431235 | 0,00363682  | 0,004799613 |
| interleukin 20 receptor beta                                          | 1,514871427 | 5,590792674 | 8,493896198 | 0,004023294 | 0,005273777 |
| RAB GTPase activating protein 1-like                                  | 1,447571875 | 5,764280627 | 8,357752127 | 0,00427585  | 0,005567215 |
| proteasome (prosome, macropain) 26S subunit, non-ATPase, 3            | 1,423852959 | 6,969293367 | 8,27743021  | 0,004432738 | 0,005733008 |
| family with sequence similarity 36, member A                          | 1,389240754 | 8,021495918 | 8,171362708 | 0,004651669 | 0,005965731 |
| phosphorylase kinase beta                                             | 1,535392471 | 4,667955036 | 8,160750737 | 0,004674181 | 0,005965731 |
| carbonic anhydrase 9                                                  | 1,440520668 | 5,209268791 | 8,112262867 | 0,004778643 | 0,006041337 |
| JNK1/MAPK8-associated membrane protein                                | 1,407739049 | 7,66512284  | 8,097353712 | 0,004811299 | 0,006041337 |
| tRNA aspartic acid methyltransferase 1                                | 1,631914297 | 4,896977103 | 8,090298848 | 0,004826841 | 0,006041337 |
| COX assembly mitochondrial protein homolog (S. cerevisiae)            | 1,353870584 | 7,508886229 | 8,041877585 | 0,00493508  | 0,006137215 |
| WAP four-disulfide core domain 13                                     | 1,357022804 | 4,772649062 | 7,986688172 | 0,005061859 | 0,006254781 |
| BMP and activin membrane-bound inhibitor, pseudogene (Xenopus laevis) | 1,623018803 | 6,142724598 | 7,961851827 | 0,005120128 | 0,006286739 |
| paraoxonase 3                                                         | 1,527033221 | 6,186484405 | 7,934988076 | 0,00518402  | 0,006317931 |
| zinc finger, DHHC domain containing 6                                 | 1,445324349 | 9,13656934  | 7,923897263 | 0,005210665 | 0,006317931 |
| RIKEN cDNA A430084P05 gene                                            | 1,518105607 | 6,63898508  | 7,654890061 | 0,005907656 | 0,007118542 |
| coatamer protein complex, subunit epsilon                             | 1,414523801 | 8,636026125 | 7,549195126 | 0,006510337 | 0,007433707 |
| fibronectin type III domain containing 7                              | 1,549931636 | 5,144946908 | 7,48687965  | 0,006397112 | 0,007613741 |
| solute carrier family 4, sodium bicarbonate cotransporter, member 7   | 1,690958173 | 7,295525535 | 7,451985525 | 0,006504508 | 0,007684552 |
| lysophosphatidic acid receptor 1                                      | 1,426250911 | 4,93019095  | 7,441932988 | 0,00653583  | 0,007684552 |
| baculoviral IAP repeat-containing 3                                   | 1,654060131 | 6,055031789 | 7,427390929 | 0,006580981 | 0,007691026 |
| ZW10 interactor                                                       | 1,536262898 | 7,147442968 | 7,387258508 | 0,006709245 | 0,007757701 |
| predicted gene, 20217                                                 | 1,554591827 | 5,230791823 | 7,384538456 | 0,006718009 | 0,007757701 |
| CD6 antigen                                                           | 1,431621203 | 5,74897908  | 7,345941576 | 0,006843797 | 0,007856193 |
| coiled-coil domain containing 75                                      | 1,370009459 | 9,928587219 | 7,209586467 | 0,007310315 | 0,008342359 |
| tumor necrosis factor (ligand) superfamily, member 13b                | 1,496186175 | 6,444203342 | 7,167413161 | 0,007461914 | 0,008465563 |
| WD repeat domain, phosphoinositide interacting 1                      | 1,508174373 | 4,782788006 | 7,136754661 | 0,007574385 | 0,008543202 |
| gamma-glutamyl cyclotransferase                                       | 1,488922448 | 6,133985324 | 7,107068215 | 0,007685147 | 0,008618026 |
| paraoxonase 3                                                         | 1,54964841  | 7,520624602 | 7,060267217 | 0,007863558 | 0,008767415 |
| versican                                                              | 1,596667214 | 5,097413487 | 6,96669415  | 0,008234703 | 0,00908862  |
| NFU1 iron-sulfur cluster scaffold homolog (S. cerevisiae)             | 1,595847855 | 5,455888068 | 6,954594427 | 0,008284146 | 0,00908862  |
| proline-rich coiled-coil 2C                                           | 1,500756452 | 5,703683076 | 6,952632801 | 0,008292194 | 0,00908862  |
| WD repeat domain 41                                                   | 1,588289679 | 4,837939341 | 6,893452733 | 0,008539256 | 0,009306829 |
| protein tyrosine phosphatase, non-receptor type 14                    | 1,632792861 | 4,857617378 | 6,832823861 | 0,00880116  | 0,009523312 |
| interferon (alpha and beta) receptor 2                                | 1,585908501 | 5,50335417  | 6,824900625 | 0,008836063 | 0,009523312 |
| B-cell receptor-associated protein 31                                 | 1,420835162 | 6,563163762 | 6,734361335 | 0,009246378 | 0,009910482 |
| spermatogenesis associated 5-like 1                                   | 1,413109616 | 5,42660915  | 6,592647331 | 0,009933277 | 0,010588219 |
| tRNA-yW synthesizing protein 3 homolog (S. cerevisiae)                | 1,362596299 | 4,58230338  | 6,57390677  | 0,010028423 | 0,010631225 |
| predicted gene 4368                                                   | 1,537147883 | 5,371023004 | 6,491394237 | 0,010459965 | 0,010971939 |
| methyltransferase like 9                                              | 1,373484422 | 7,930755297 | 6,490840632 | 0,010462932 | 0,010971939 |
| Yip1 domain family, member 1                                          | 1,384272237 | 7,72608738  | 6,393070794 | 0,011002258 | 0,011436167 |
| leucine zipper protein 1                                              | 1,48755152  | 4,913720225 | 6,389333279 | 0,011023522 | 0,011436167 |
| RIKEN cDNA 9930023K05 gene                                            | 1,536156375 | 7,327681151 | 6,226416567 | 0,011996847 | 0,012379725 |
| sno, strawberry notch homolog 1 (Drosophila)                          | 1,487831781 | 5,099360816 | 6,209357105 | 0,012104351 | 0,012386205 |
| kelch domain containing 1                                             | 1,495565808 | 5,141247947 | 6,20518348  | 0,01213082  | 0,012386205 |
| NHP2 ribonucleoprotein homolog (yeast)                                | 1,375362341 | 4,736207155 | 6,122249483 | 0,012670797 | 0,012869815 |
| transcription elongation factor A (SII)-like 1                        | 1,552962919 | 5,738078467 | 5,968292871 | 0,013747974 | 0,013891182 |
| FK506 binding protein-like                                            | 1,394169987 | 5,113847817 | 5,919224512 | 0,014113087 | 0,014148266 |
| cold shock domain containing E1, RNA binding                          | 1,48489512  | 6,852825414 | 5,914573753 | 0,014148266 | 0,014148266 |

**Panel 4: Genes significantly down-regulated in *Porphyromonas gingivalis* treated DCs (FDR < 0.05), not regulated in response to *Aggregatibacter actinomycetemcomitans* challenge.**

| Name                                                                         | FC Pg       | AveExpr     | F           | P.Value     | adj.P.Val   |
|------------------------------------------------------------------------------|-------------|-------------|-------------|-------------|-------------|
| phospholipid transfer protein                                                | 0,426233093 | 8,453045542 | 53,61259546 | 3,47E-07    | 2,87E-05    |
| histocompatibility 2, class II, locus DMA                                    | 0,538300835 | 9,848877707 | 47,53455786 | 7,15E-07    | 2,87E-05    |
| AXL receptor tyrosine kinase                                                 | 0,469516967 | 10,75481151 | 46,94530181 | 7,70E-07    | 2,87E-05    |
| expressed sequence AI607873                                                  | 0,427472878 | 8,317828766 | 41,80218401 | 1,53E-06    | 3,65E-05    |
| histocompatibility 2, class II, locus DMA                                    | 0,613616704 | 10,40177139 | 41,35413196 | 1,63E-06    | 3,65E-05    |
| nuclear receptor coactivator 1                                               | 0,550284133 | 6,143727405 | 25,1142408  | 2,68E-05    | 0,000498146 |
| nebulin-related anchoring protein                                            | 0,462685723 | 6,466071326 | 24,42604679 | 3,11E-05    | 0,000498146 |
| CDC42 effector protein (Rho GTPase binding) 4                                | 0,695469221 | 7,098565298 | 23,49373643 | 3,83E-05    | 0,000535851 |
| RIKEN cDNA 5430427O19 gene                                                   | 0,580954279 | 6,230464189 | 19,9327209  | 8,97E-05    | 0,001116484 |
| cytochrome P450, family 4, subfamily f, polypeptide 18                       | 0,653231446 | 5,006314424 | 18,41625644 | 0,000133548 | 0,001495743 |
| eosinophil-associated, ribonuclease A family, member 2                       | 0,45292672  | 6,575552717 | 17,94706129 | 0,000151775 | 0,001545346 |
| placenta-specific 8                                                          | 0,549626225 | 5,149262382 | 16,96529181 | 0,000199962 | 0,001865824 |
| proteolipid protein 2                                                        | 0,70414167  | 9,520123138 | 16,68855752 | 0,000216569 | 0,001865824 |
| N-deacetylase/N-sulfotransferase (heparan glucosaminyl) 1                    | 0,591909706 | 5,549949835 | 15,99807971 | 0,000265373 | 0,002022599 |
| THO complex 3                                                                | 0,623218276 | 5,572776147 | 15,9293827  | 0,000270884 | 0,002022599 |
| eosinophil-associated, ribonuclease A family, member 2                       | 0,455513671 | 8,250654205 | 14,9642949  | 0,000364018 | 0,00251489  |
| tenascin C                                                                   | 0,595610769 | 5,432968559 | 14,81305137 | 0,000381724 | 0,00251489  |
| DCN1, defective in cullin neddylation 1, domain containing 4 (S. cerevisiae) | 0,504207065 | 5,544644568 | 14,0897371  | 0,00048132  | 0,002987127 |
| RAS p21 protein activator 4                                                  | 0,618949367 | 6,475274906 | 13,77829268 | 0,000533169 | 0,002987127 |
| frequently rearranged in advanced T-cell lymphomas 2                         | 0,564051066 | 5,211306505 | 13,77689351 | 0,000533416 | 0,002987127 |
| MARVEL (membrane-associating) domain containing 1                            | 0,624801266 | 7,215544225 | 13,46791286 | 0,000591312 | 0,003069966 |
| low density lipoprotein receptor adaptor protein 1                           | 0,49085116  | 5,282214637 | 13,28172804 | 0,000629669 | 0,003069966 |
| nonhomologous end-joining factor 1                                           | 0,685888605 | 5,573107319 | 13,24126631 | 0,000638378 | 0,003069966 |
| Kruppel-like factor 4 (gut)                                                  | 0,558444493 | 5,101703051 | 12,97413197 | 0,000699467 | 0,003069966 |
| family with sequence similarity 46, member C                                 | 0,724500832 | 7,002481256 | 12,91757794 | 0,000713245 | 0,003069966 |
| mediator complex subunit 15                                                  | 0,631134215 | 8,249849389 | 12,84965969 | 0,000730204 | 0,003069966 |
| DNA-damage inducible transcript 3                                            | 0,692833904 | 7,799115308 | 12,75450222 | 0,000754749 | 0,003069966 |

|                                                                            |             |             |             |             |             |
|----------------------------------------------------------------------------|-------------|-------------|-------------|-------------|-------------|
| microtubule associated monooxygenase, calponin and LIM domain containing 1 | 0,65231889  | 6,108772374 | 12,70648748 | 0,000767492 | 0,003069966 |
| mannosidase, alpha, class 1C, member 1                                     | 0,511159184 | 5,063836332 | 12,19235854 | 0,000920606 | 0,00344027  |
| zinc finger, X-linked, duplicated A                                        | 0,572841884 | 8,051295266 | 12,18964898 | 0,000921501 | 0,00344027  |
| microsomal glutathione S-transferase 3                                     | 0,547299803 | 6,660906038 | 12,0769904  | 0,000959609 | 0,003466975 |
| plexin domain containing 1                                                 | 0,566646691 | 6,016778491 | 11,91370666 | 0,001018096 | 0,003549085 |
| transmembrane protein 184b                                                 | 0,742041586 | 11,5322807  | 11,84030278 | 0,001045713 | 0,003549085 |
| AHNAK nucleoprotein (desmoyokin)                                           | 0,647501764 | 9,307967213 | 11,07025279 | 0,001393754 | 0,004591188 |
| zinc finger CCCH type containing 3                                         | 0,69184724  | 7,634129583 | 10,945464   | 0,001461876 | 0,004678003 |
| synapsin I                                                                 | 0,632542985 | 6,609250726 | 10,62313773 | 0,001656237 | 0,005152739 |
| CAP-GLY domain containing linker protein 1                                 | 0,707295033 | 7,65054877  | 10,42116582 | 0,001793103 | 0,005427772 |
| eosinophil-associated, ribonuclease A family, member 4                     | 0,524718229 | 6,299890559 | 10,05371649 | 0,002076774 | 0,006121018 |
| RIKEN cDNA A230050P20 gene                                                 | 0,646257241 | 7,109738133 | 9,919612011 | 0,002192878 | 0,006185945 |
| unc-13 homolog B (C. elegans)                                              | 0,56387452  | 5,315515735 | 9,901340298 | 0,002209266 | 0,006185945 |
| poly(A) binding protein, cytoplasmic 1                                     | 0,714185733 | 6,083015205 | 9,663537133 | 0,002435891 | 0,006654142 |
| eukaryotic translation initiation factor 4B                                | 0,646140203 | 6,254375915 | 9,542930636 | 0,002560951 | 0,006829204 |
| AHNAK nucleoprotein (desmoyokin)                                           | 0,669638819 | 5,845524202 | 9,425108053 | 0,002690285 | 0,006849828 |
| selenocysteine lyase                                                       | 0,656115497 | 7,148314535 | 9,407184087 | 0,002710609 | 0,006849828 |
| zinc finger and BTB domain containing 9                                    | 0,645439138 | 5,448849995 | 9,34937627  | 0,002777413 | 0,006849828 |
| GDP-mannose pyrophosphorylase B                                            | 0,664913657 | 5,0710508   | 9,307244681 | 0,002827212 | 0,006849828 |
| fermitin family homolog 2 (Drosophila)                                     | 0,540367035 | 5,816816134 | 9,233787304 | 0,002916591 | 0,006849828 |
| galactosidase, beta 1                                                      | 0,694336432 | 9,460579392 | 9,158042312 | 0,003012163 | 0,006849828 |
| CCR4 carbon catabolite repression 4-like (S. cerevisiae)                   | 0,657865311 | 6,983633517 | 9,132905155 | 0,00304467  | 0,006849828 |
| WW domain containing E3 ubiquitin protein ligase 2                         | 0,604439843 | 4,88717371  | 9,05542401  | 0,003147428 | 0,006849828 |
| kelch-like 22 (Drosophila)                                                 | 0,680436299 | 6,367919607 | 9,036973299 | 0,003172481 | 0,006849828 |
| ADP-ribosylation factor-like 6 interacting protein 5                       | 0,699114271 | 9,763805067 | 8,997235369 | 0,003227218 | 0,006849828 |
| palmitoyl-protein thioesterase 1                                           | 0,691741854 | 7,594253097 | 8,969241047 | 0,00326643  | 0,006849828 |
| phosphatidylinositol 4-kinase type 2 alpha                                 | 0,684549951 | 10,4700564  | 8,943760394 | 0,003302596 | 0,006849828 |
| E74-like factor 2                                                          | 0,670236007 | 5,31595082  | 8,888411644 | 0,003382749 | 0,006881077 |
| toll-interleukin 1 receptor (TIR) domain-containing adaptor protein        | 0,664962007 | 6,658597964 | 8,849430446 | 0,003440538 | 0,006881077 |
| zinc finger protein 715                                                    | 0,650028696 | 6,347875509 | 8,756695685 | 0,003582626 | 0,007039546 |
| SAM domain and HD domain, 1                                                | 0,726756121 | 8,328500037 | 8,714990539 | 0,003648712 | 0,007045789 |
| coactosin-like 1 (Dictyostelium)                                           | 0,709215739 | 12,30005411 | 8,670074869 | 0,003721454 | 0,007063006 |
| numb gene homolog (Drosophila)                                             | 0,653056523 | 4,793195232 | 8,632400574 | 0,003783755 | 0,007063006 |
| cytochrome c oxidase subunit VIIa polypeptide 2-like                       | 0,703564006 | 10,04871148 | 8,562261923 | 0,003902949 | 0,007166071 |
| N-acetylated alpha-linked acidic dipeptidase-like 2                        | 0,61269885  | 4,760535551 | 8,500218279 | 0,004011988 | 0,007217405 |
| RIKEN cDNA 1300018I17 gene                                                 | 0,714425719 | 5,90182878  | 8,472554823 | 0,004061729 | 0,007217405 |
| plexin A2                                                                  | 0,608189183 | 5,437471169 | 8,403728956 | 0,00418858  | 0,007217405 |
| protein phosphatase 2, regulatory subunit B (B56), delta isoform           | 0,711110727 | 7,520906971 | 8,403679686 | 0,004188673 | 0,007217405 |
| protein kinase C and casein kinase substrate in neurons 1                  | 0,66274854  | 5,111299277 | 8,246571868 | 0,00449564  | 0,007628966 |
| protease, serine, 46                                                       | 0,625818453 | 5,101006238 | 8,086245403 | 0,004835797 | 0,00808372  |
| actinin alpha 4                                                            | 0,707118201 | 7,265488351 | 8,04306873  | 0,004932385 | 0,008123928 |
| mitogen-activated protein kinase-activated protein kinase 3                | 0,683244688 | 7,883232451 | 8,006729545 | 0,005015394 | 0,008140929 |
| death inducer-oblierator 1                                                 | 0,690073159 | 5,629400591 | 7,90401404  | 0,005258827 | 0,008414123 |
| zinc finger, FYVE domain containing 1                                      | 0,603514877 | 5,707283747 | 7,856283547 | 0,005376539 | 0,008481301 |
| laminin, alpha 5                                                           | 0,653195614 | 5,00330622  | 7,739660487 | 0,005677085 | 0,008831022 |
| DiGeorge syndrome critical region gene 14                                  | 0,702209708 | 7,290712282 | 7,63681905  | 0,005958186 | 0,009141327 |
| ankyrin repeat domain 11                                                   | 0,731048691 | 5,918297861 | 7,590478918 | 0,006090043 | 0,009217362 |
| DNA-damage inducible transcript 3                                          | 0,679721139 | 6,765433835 | 7,458939383 | 0,006482942 | 0,009518892 |
| RAB11 family interacting protein 3 (class II)                              | 0,698742839 | 5,334160118 | 7,433569197 | 0,006562022 | 0,009518892 |
| methyltransferase like 17                                                  | 0,681120125 | 7,156949492 | 7,42758891  | 0,006580824 | 0,009518892 |
| lysophosphatidylcholine acyltransferase 4                                  | 0,654691648 | 5,13932276  | 7,390591989 | 0,006698522 | 0,009518892 |
| histone cluster 1, H2bj                                                    | 0,670413366 | 8,875692154 | 7,385714494 | 0,006714219 | 0,009518892 |
| signal-induced proliferation-associated 1 like 2                           | 0,728314064 | 4,862129779 | 7,330943565 | 0,006893403 | 0,009563754 |
| transmembrane protein 129                                                  | 0,683471389 | 7,003214554 | 7,323959476 | 0,006916643 | 0,009563754 |
| DOT1-like, histone H3 methyltransferase (S. cerevisiae)                    | 0,719644716 | 5,532602813 | 7,288343567 | 0,007036566 | 0,009598325 |
| transmembrane protein 214                                                  | 0,722552094 | 6,755288142 | 7,265991795 | 0,007113045 | 0,009598325 |
| predicted pseudogene 9265                                                  | 0,683509771 | 6,380954787 | 7,190778193 | 0,007377484 | 0,00975197  |
| solute carrier family 4 (anion exchanger), member 2                        | 0,71678214  | 8,995822065 | 7,184226133 | 0,007401049 | 0,00975197  |
| family with sequence similarity 168, member B                              | 0,716681352 | 7,506031473 | 7,114949257 | 0,007655563 | 0,009951253 |
| protein phosphatase 1A, magnesium dependent, alpha isoform                 | 0,737871547 | 9,990434163 | 7,095188387 | 0,007729991 | 0,009951253 |
| zinc finger protein 161                                                    | 0,690427449 | 5,455210109 | 7,032350317 | 0,007972241 | 0,010146488 |
| cDNA sequence BC030476                                                     | 0,666432256 | 9,956113936 | 6,981558829 | 0,008174424 | 0,010286916 |
| thymocyte selection-associated high mobility group box                     | 0,697105493 | 4,722512522 | 6,902460842 | 0,00850111  | 0,010480103 |
| COX4 neighbor                                                              | 0,746955952 | 8,880639992 | 6,885026942 | 0,008575113 | 0,010480103 |
| exostos (multiple)-like 1                                                  | 0,721493032 | 7,428906179 | 6,855165875 | 0,00870359  | 0,010480103 |
| platelet derived growth factor, B polypeptide                              | 0,736374529 | 8,897202543 | 6,844735686 | 0,008748985 | 0,010480103 |
| microtubule-associated protein 15                                          | 0,733902365 | 7,511453173 | 6,834043766 | 0,008795801 | 0,010480103 |
| general transcription factor II I                                          | 0,731352659 | 9,867766472 | 6,810416977 | 0,008900276 | 0,010492957 |
| homeobox A7                                                                | 0,729553297 | 5,091147354 | 6,781630297 | 0,009029497 | 0,010534413 |
| dipeptidylpeptidase 3                                                      | 0,747318066 | 8,388234    | 6,748958967 | 0,009178769 | 0,010598167 |
| pyridoxal (pyridoxine, vitamin B6) phosphatase                             | 0,510293436 | 5,343295705 | 6,617160431 | 0,009810382 | 0,011103833 |
| Nedd4 family interacting protein 2                                         | 0,728724858 | 6,615123656 | 6,614252352 | 0,00982477  | 0,011103833 |
| midline 1                                                                  | 0,690069064 | 4,801010709 | 6,596442323 | 0,009914136 | 0,011103833 |
| RIKEN cDNA 0610031J06 gene                                                 | 0,731157917 | 9,031396224 | 6,536998345 | 0,01021888  | 0,011331828 |
| interferon gamma receptor 2                                                | 0,741439198 | 9,190425129 | 6,412739576 | 0,010891263 | 0,011873084 |
| cell division cycle associated 4                                           | 0,729308894 | 7,041507217 | 6,404027632 | 0,010940277 | 0,011873084 |
| nuclear receptor co-repressor 1                                            | 0,719546403 | 7,425565639 | 6,382238368 | 0,011063976 | 0,011873084 |
| sine oculis-binding protein homolog (Drosophila)                           | 0,71528388  | 4,766032962 | 6,370545663 | 0,011131017 | 0,011873084 |
| CASK-interacting protein 2                                                 | 0,670898479 | 6,459990078 | 6,314062693 | 0,011461498 | 0,012110262 |
| zinc finger, MYND-type containing 15                                       | 0,642135212 | 5,523107702 | 6,253605297 | 0,011827767 | 0,012253893 |
| multiple endocrine neoplasia 1                                             | 0,72316018  | 6,845326069 | 6,24921756  | 0,011854867 | 0,012253893 |

|                                      |             |             |             |             |             |
|--------------------------------------|-------------|-------------|-------------|-------------|-------------|
| vacuolar protein sorting 33B (yeast) | 0,666902987 | 6,156617596 | 6,237809243 | 0,011925664 | 0,012253893 |
| coiled-coil domain containing 65     | 0,706822687 | 6,513562127 | 6,008200905 | 0,013458995 | 0,013703704 |
| histone cluster 1, H2bn              | 0,730427718 | 7,025137501 | 5,976053982 | 0,013691222 | 0,013814566 |
| peptidyl arginine deiminase, type II | 0,641001813 | 4,816446243 | 5,89602518  | 0,014289575 | 0,014289575 |

**Panel 5: Genes significantly up-regulated in *Aggregatibacter actinomycetemcomitans* treated DCs (FDR < 0.05), but not regulated in response to *Porphyromonas gingivalis* challenge.**

| Name                                                                              | FC Pg       | AveExpr     | F           | P.Value  | adj.P.Val |
|-----------------------------------------------------------------------------------|-------------|-------------|-------------|----------|-----------|
| interleukin 23, alpha subunit p19                                                 | 1,068128511 | 6,202275212 | 554,3903777 | 8,78E-14 | 1,52E-10  |
| phospholipase A1 member A                                                         | 1,155703751 | 6,200798708 | 462,4826844 | 2,97E-13 | 2,18E-10  |
| histidine decarboxylase                                                           | 1,204994898 | 6,363517551 | 446,3637262 | 3,77E-13 | 2,18E-10  |
| phospholipase A1 member A                                                         | 1,187117576 | 7,69005837  | 388,6239503 | 9,55E-13 | 4,02E-10  |
| ectonucleotide pyrophosphatase/phosphodiesterase 2                                | 1,202861569 | 5,744005057 | 377,4440673 | 1,16E-12 | 4,02E-10  |
| niacin receptor 1                                                                 | 1,164970906 | 5,595976022 | 317,5579803 | 3,68E-12 | 1,06E-09  |
| signaling lymphocytic activation molecule family member 1                         | 1,073136254 | 5,342792771 | 258,1785373 | 1,46E-11 | 3,61E-09  |
| phospholipase A1 member A                                                         | 1,125158776 | 6,788752911 | 246,7441568 | 1,97E-11 | 4,27E-09  |
| G protein-coupled receptor 183                                                    | 1,105230703 | 7,408120187 | 218,6984823 | 4,39E-11 | 7,61E-09  |
| predicted gene 14207                                                              | 1,197965511 | 5,523323169 | 218,6323757 | 4,40E-11 | 7,61E-09  |
| serine (or cysteine) peptidase inhibitor, clade B, member 2                       | 0,901186743 | 6,544759598 | 192,6993293 | 1,01E-10 | 1,59E-08  |
| tumor necrosis factor (ligand) superfamily, member 9                              | 1,340794092 | 5,64489171  | 163,6188375 | 2,96E-10 | 3,74E-08  |
| leucine-rich repeats and immunoglobulin-like domains 1                            | 1,119556213 | 6,53676943  | 163,373676  | 2,99E-10 | 3,74E-08  |
| schlafen 1                                                                        | 0,919487171 | 5,565904386 | 163,0896453 | 3,02E-10 | 3,74E-08  |
| histidine decarboxylase                                                           | 1,041569118 | 5,233667545 | 154,8296581 | 4,25E-10 | 4,90E-08  |
| RAB26, member RAS oncogene family                                                 | 0,843826429 | 7,618814198 | 151,7302722 | 4,84E-10 | 5,24E-08  |
| three prime repair exonuclease 1                                                  | 1,195766878 | 8,821403161 | 147,2607973 | 5,89E-10 | 5,69E-08  |
| RIKEN cDNA 2310016C08 gene                                                        | 1,098866927 | 9,076090585 | 147,1579717 | 5,91E-10 | 5,69E-08  |
| F-box protein 32                                                                  | 0,76077284  | 7,672811979 | 143,866093  | 6,85E-10 | 6,24E-08  |
| interferon activated gene 205                                                     | 1,10379663  | 5,343228551 | 140,5956967 | 7,96E-10 | 6,89E-08  |
| interferon induced transmembrane protein 1                                        | 1,300717033 | 12,44578827 | 139,0461654 | 8,55E-10 | 7,05E-08  |
| three prime repair exonuclease 1                                                  | 1,273936841 | 9,790331342 | 137,3375249 | 9,27E-10 | 7,29E-08  |
| solute carrier family 1 (glial high affinity glutamate transporter), member 2     | 1,274328156 | 5,37312577  | 134,7999538 | 1,05E-09 | 7,87E-08  |
| matrix metalloproteinase 13                                                       | 0,773213785 | 10,15848465 | 132,8575275 | 1,15E-09 | 8,29E-08  |
| eukaryotic translation initiation factor 2-alpha kinase 2                         | 1,336951686 | 9,684956207 | 131,1852099 | 1,25E-09 | 8,64E-08  |
| Rho-related BTB domain containing 1                                               | 1,168216385 | 7,042669672 | 120,8648757 | 2,12E-09 | 1,41E-07  |
| ChaC, cation transport regulator-like 1 (E. coli)                                 | 0,805308367 | 6,299887548 | 118,8694027 | 2,36E-09 | 1,47E-07  |
| syndecan binding protein (syntenin) 2                                             | 1,178760613 | 5,812032412 | 118,7678233 | 2,37E-09 | 1,47E-07  |
| sema domain, immunoglobulin domain (Ig), and GPI membrane anchor, (semaphorin) 7A | 1,109293002 | 5,959551094 | 117,7361636 | 2,51E-09 | 1,50E-07  |
| tumor necrosis factor receptor superfamily, member 9                              | 1,260752612 | 8,778964574 | 116,5318816 | 2,68E-09 | 1,53E-07  |
| interferon-induced protein with tetratricopeptide repeats 3                       | 0,909563964 | 5,297674393 | 116,1170942 | 2,74E-09 | 1,53E-07  |
| interferon regulatory factor 7                                                    | 1,343579979 | 5,543592216 | 114,9446334 | 2,93E-09 | 1,58E-07  |
| RIKEN cDNA 2310016C08 gene                                                        | 0,998691555 | 7,440180867 | 114,2383785 | 3,05E-09 | 1,60E-07  |
| sema domain, immunoglobulin domain (Ig), and GPI membrane anchor, (semaphorin) 7A | 1,180251766 | 10,56655789 | 113,0411362 | 3,26E-09 | 1,66E-07  |
| single-stranded DNA binding protein 3                                             | 1,266082321 | 7,800927634 | 111,6146922 | 3,54E-09 | 1,75E-07  |
| dual specificity phosphatase 14                                                   | 1,345262961 | 5,489843426 | 110,9317256 | 3,68E-09 | 1,77E-07  |
| vascular endothelial growth factor A                                              | 1,395462555 | 7,27346204  | 110,3014058 | 3,82E-09 | 1,79E-07  |
| histocompatibility 2, class II, locus Mb2                                         | 1,382153837 | 7,717053884 | 107,4616231 | 4,51E-09 | 2,06E-07  |
| RIKEN cDNA 1500031L02 gene                                                        | 1,229655895 | 8,721490073 | 105,7038165 | 5,01E-09 | 2,18E-07  |
| reticulum 1                                                                       | 1,185635613 | 5,982476456 | 105,6327789 | 5,04E-09 | 2,18E-07  |
| interferon induced transmembrane protein 1                                        | 1,07989488  | 5,366147544 | 101,4976084 | 6,50E-09 | 2,75E-07  |
| vitamin D receptor                                                                | 1,246912528 | 5,280181803 | 101,0270966 | 6,70E-09 | 2,76E-07  |
| KiSS-1 metastasis-suppressor                                                      | 1,044344736 | 4,927051591 | 100,5967119 | 6,88E-09 | 2,77E-07  |
| interleukin 1 receptor antagonist                                                 | 1,18636943  | 8,955886403 | 100,1838262 | 7,07E-09 | 2,78E-07  |
| glutaminase 2 (liver, mitochondrial)                                              | 1,224106099 | 8,020144737 | 99,16757032 | 7,54E-09 | 2,90E-07  |
| vasohibin 1                                                                       | 1,313338378 | 6,81693868  | 98,20749304 | 8,02E-09 | 3,02E-07  |
| vitamin D receptor                                                                | 1,264970948 | 7,137559636 | 97,25738166 | 8,54E-09 | 3,14E-07  |
| TNF receptor associated factor 4                                                  | 1,065835082 | 5,207240797 | 96,92190843 | 8,73E-09 | 3,15E-07  |
| fibroblast growth factor receptor 2                                               | 1,020222392 | 5,331587103 | 94,08422135 | 1,05E-08 | 3,69E-07  |
| SEC14 and spectrin domains 1                                                      | 1,171751311 | 6,212688631 | 93,69156674 | 1,08E-08 | 3,69E-07  |
| TRAF3 interacting protein 2                                                       | 1,41566043  | 5,293755266 | 93,46915588 | 1,10E-08 | 3,69E-07  |
| poly (ADP-ribose) polymerase family, member 12                                    | 1,196184588 | 6,940100702 | 93,33711368 | 1,11E-08 | 3,69E-07  |
| reticulum 1                                                                       | 1,209024523 | 5,308300188 | 90,22420301 | 1,38E-08 | 4,49E-07  |
| chemokine (C-X-C motif) receptor 5                                                | 1,145399908 | 5,670786837 | 88,18014106 | 1,59E-08 | 5,10E-07  |
| CD86 antigen                                                                      | 1,450942605 | 7,830608938 | 86,77391404 | 1,76E-08 | 5,42E-07  |
| F-box protein 32                                                                  | 1,229500782 | 5,397952189 | 86,68623464 | 1,77E-08 | 5,42E-07  |
| glutaminase 2 (liver, mitochondrial)                                              | 1,292705787 | 7,808407061 | 86,58415825 | 1,78E-08 | 5,42E-07  |
| huntingtin interacting protein 1 related                                          | 0,924384157 | 4,93272434  | 84,09900024 | 2,14E-08 | 6,40E-07  |
| solute carrier family 1 (glial high affinity glutamate transporter), member 2     | 1,359216468 | 5,808912106 | 83,48317647 | 2,25E-08 | 6,55E-07  |
| SH3 domain binding glutamic acid-rich protein like 2                              | 0,88557932  | 6,447968197 | 83,33571298 | 2,27E-08 | 6,55E-07  |
| interferon-induced protein with tetratricopeptide repeats 2                       | 1,040915808 | 5,18844882  | 82,41095248 | 2,44E-08 | 6,92E-07  |
| DEXH (Asp-Glu-X-His) box polypeptide 58                                           | 1,44221566  | 6,599379047 | 80,49679358 | 2,83E-08 | 7,89E-07  |
| neural precursor cell expressed, developmentally down-regulated gene 9            | 1,228818414 | 7,484461087 | 79,55936296 | 3,04E-08 | 8,36E-07  |
| CD81 antigen                                                                      | 1,389309184 | 11,9432622  | 77,45675648 | 3,60E-08 | 9,73E-07  |
| 2'-5' oligoadenylate synthetase-like 1                                            | 1,259274333 | 5,191565466 | 76,35500263 | 3,93E-08 | 1,05E-06  |
| interferon-induced protein 35                                                     | 1,043877006 | 8,916539992 | 75,23858918 | 4,31E-08 | 1,13E-06  |
| ectonucleotide pyrophosphatase/phosphodiesterase 2                                | 0,865367173 | 5,405851498 | 74,47186764 | 4,60E-08 | 1,19E-06  |
| DEXH (Asp-Glu-X-His) box polypeptide 58                                           | 1,467155543 | 7,238091525 | 74,13480602 | 4,73E-08 | 1,20E-06  |
| asparagine synthetase                                                             | 1,028339511 | 8,424675795 | 71,52307548 | 5,92E-08 | 1,48E-06  |
| gene rich cluster, C10 gene                                                       | 1,33391491  | 9,637366524 | 70,75882385 | 6,33E-08 | 1,56E-06  |
| nuclear protein 1                                                                 | 1,353547275 | 8,257943048 | 70,20013504 | 6,64E-08 | 1,62E-06  |
| class II transactivator                                                           | 1,274008901 | 8,93984959  | 70,04894398 | 6,73E-08 | 1,62E-06  |
| guanine nucleotide binding protein (G protein), gamma 4                           | 1,216274077 | 5,271054633 | 69,72715374 | 6,93E-08 | 1,64E-06  |

|                                                                                               |             |             |             |          |          |
|-----------------------------------------------------------------------------------------------|-------------|-------------|-------------|----------|----------|
| adenosine A2b receptor                                                                        | 1,00609876  | 6,949836124 | 69,2305788  | 7,24E-08 | 1,69E-06 |
| immunity-related GTPase family M member 2                                                     | 0,997246631 | 7,465725483 | 68,83328212 | 7,51E-08 | 1,72E-06 |
| predicted gene, 20056                                                                         | 1,30834466  | 7,106612215 | 68,7447907  | 7,57E-08 | 1,72E-06 |
| signal transducer and activator of transcription 5A                                           | 1,280390106 | 8,37466206  | 68,11172059 | 8,01E-08 | 1,78E-06 |
| neural precursor cell expressed, developmentally down-regulated gene 9                        | 1,173918918 | 7,230217421 | 68,08534737 | 8,03E-08 | 1,78E-06 |
| BCL2-like 11 (apoptosis facilitator)                                                          | 1,44730564  | 6,863263563 | 67,94151913 | 8,14E-08 | 1,78E-06 |
| interferon activated gene 205                                                                 | 1,145088302 | 4,868284622 | 67,46233354 | 8,50E-08 | 1,84E-06 |
| chondroitin sulfate N-acetylgalactosaminyltransferase 1                                       | 1,402409999 | 5,288705323 | 67,3289432  | 8,61E-08 | 1,84E-06 |
| family with sequence similarity 46, member A                                                  | 0,801981974 | 7,764713275 | 66,98588291 | 8,89E-08 | 1,87E-06 |
| RIKEN cDNA 1500003003 gene                                                                    | 1,050201231 | 7,064793579 | 66,79749486 | 9,04E-08 | 1,87E-06 |
| reticulon 1                                                                                   | 1,152265661 | 5,875184376 | 66,77797837 | 9,06E-08 | 1,87E-06 |
| castor homolog 1, zinc finger (Drosophila)                                                    | 0,862747125 | 6,674794272 | 66,56526842 | 9,24E-08 | 1,88E-06 |
| RIKEN cDNA 9130014G24 gene                                                                    | 1,079280615 | 4,928454041 | 65,40123192 | 1,03E-07 | 2,07E-06 |
| sema domain, immunoglobulin domain (Ig), TM domain, and short cytoplasmic domain              | 0,989546446 | 5,180336617 | 65,10879828 | 1,06E-07 | 2,11E-06 |
| cerebellin 1 precursor protein                                                                | 1,34697823  | 6,049517444 | 64,86120468 | 1,08E-07 | 2,13E-06 |
| pleckstrin homology domain containing, family G (with RhoGef domain) member 3                 | 0,841184068 | 7,912608923 | 64,6304917  | 1,11E-07 | 2,15E-06 |
| cytidine monophosphate (UMP-CMP) kinase 2, mitochondrial                                      | 0,954856635 | 5,724257073 | 64,53892293 | 1,12E-07 | 2,15E-06 |
| transducin-like enhancer of split 1, homolog of Drosophila E(spl)                             | 1,340938576 | 6,341464646 | 63,64529969 | 1,22E-07 | 2,32E-06 |
| family with sequence similarity 169, member B                                                 | 1,264748713 | 5,820629185 | 63,39661886 | 1,25E-07 | 2,33E-06 |
| signal transducer and activator of transcription 1                                            | 1,232644583 | 8,154692642 | 63,38306802 | 1,25E-07 | 2,33E-06 |
| UDP-N-acetyl-alpha-D-galactosamine:polypeptide N-acetylgalactosaminyltransferase 10           | 1,305629143 | 8,792782827 | 63,23431721 | 1,27E-07 | 2,33E-06 |
| kinesin family member 5C                                                                      | 1,346553368 | 5,889878285 | 62,3612488  | 1,38E-07 | 2,51E-06 |
| Kruppel-like factor 5                                                                         | 1,134561873 | 6,3706796   | 62,28026814 | 1,39E-07 | 2,51E-06 |
| signal transducer and activator of transcription 1                                            | 1,233917214 | 9,584862368 | 61,5327042  | 1,50E-07 | 2,68E-06 |
| killer cell lectin-like receptor family I member 1                                            | 1,01838194  | 5,760826084 | 61,10090243 | 1,57E-07 | 2,75E-06 |
| RIKEN cDNA 1110012D08 gene                                                                    | 1,321892808 | 8,340240457 | 61,0389768  | 1,58E-07 | 2,75E-06 |
| 5'-nucleotidase, cytosolic III                                                                | 1,140949546 | 8,584716598 | 60,81820162 | 1,61E-07 | 2,78E-06 |
| small proline-rich protein 2D                                                                 | 1,037496371 | 5,343640369 | 60,75579715 | 1,62E-07 | 2,78E-06 |
| tribbles homolog 3 (Drosophila)                                                               | 1,143130552 | 5,657198231 | 60,32497339 | 1,69E-07 | 2,87E-06 |
| synaptotagmin VII                                                                             | 1,153325791 | 7,832313211 | 59,75466482 | 1,79E-07 | 3,02E-06 |
| interferon gamma induced GTPase                                                               | 1,132330309 | 6,972788586 | 58,78060286 | 1,98E-07 | 3,30E-06 |
| Musashi homolog 2 (Drosophila)                                                                | 1,100307918 | 6,388044608 | 58,46314915 | 2,05E-07 | 3,38E-06 |
| nitric oxide synthase 2, inducible                                                            | 0,97274798  | 4,982973775 | 58,38015589 | 2,07E-07 | 3,38E-06 |
| prostaglandin E synthase                                                                      | 1,508801465 | 5,61386313  | 57,53443511 | 2,26E-07 | 3,66E-06 |
| whirlin                                                                                       | 1,092760112 | 7,47658333  | 56,54216599 | 2,51E-07 | 4,01E-06 |
| ring finger protein 213                                                                       | 0,765015224 | 9,701420689 | 56,47863546 | 2,53E-07 | 4,01E-06 |
| collagen, type IV, alpha 2                                                                    | 1,757919279 | 6,435185076 | 56,42168838 | 2,55E-07 | 4,01E-06 |
| SEC14 and spectrin domains 1                                                                  | 1,157275568 | 9,440749371 | 55,90749395 | 2,69E-07 | 4,20E-06 |
| galactose-3-O-sulfotransferase 1                                                              | 1,299085967 | 5,194571858 | 55,43292363 | 2,84E-07 | 4,33E-06 |
| 2'-5' oligoadenylate synthetase-like 2                                                        | 1,332329876 | 8,407172424 | 55,40938504 | 2,84E-07 | 4,33E-06 |
| Rap guanine nucleotide exchange factor (GEF) 5                                                | 1,336077001 | 6,117925934 | 55,38150148 | 2,85E-07 | 4,33E-06 |
| zinc finger, MYM-type 3                                                                       | 1,250485185 | 8,390013443 | 53,49986567 | 3,52E-07 | 5,29E-06 |
| poly (ADP-ribose) polymerase family, member 14                                                | 1,018017864 | 9,490746229 | 52,88057088 | 3,77E-07 | 5,61E-06 |
| immunity-related GTPase family M member 1                                                     | 1,04689381  | 7,367367895 | 52,83209979 | 3,79E-07 | 5,61E-06 |
| lymphocyte antigen 6 complex, locus A                                                         | 1,471465733 | 7,152990843 | 52,30190145 | 4,03E-07 | 5,91E-06 |
| interleukin 15 receptor, alpha chain                                                          | 1,097906653 | 7,025403776 | 51,76632773 | 4,29E-07 | 6,24E-06 |
| hepcidin antimicrobial peptide                                                                | 0,859563081 | 5,371596823 | 51,52141826 | 4,41E-07 | 6,36E-06 |
| opioid growth factor receptor                                                                 | 1,224310875 | 10,04248094 | 51,43107199 | 4,46E-07 | 6,36E-06 |
| interferon regulatory factor 4                                                                | 0,904275924 | 9,367244567 | 51,38581867 | 4,48E-07 | 6,36E-06 |
| interferon induced transmembrane protein 3                                                    | 0,737944181 | 12,01734693 | 51,12345948 | 4,62E-07 | 6,51E-06 |
| nuclear factor of kappa light polypeptide gene enhancer in B-cells inhibitor, epsilon         | 1,368147377 | 8,573482495 | 50,54006558 | 4,95E-07 | 6,92E-06 |
| ubiquitin specific peptidase 18                                                               | 0,841409963 | 8,378833363 | 50,42973224 | 5,02E-07 | 6,95E-06 |
| syndecan binding protein (syntenin) 2                                                         | 1,064473035 | 4,77818473  | 50,155006   | 5,19E-07 | 7,13E-06 |
| signaling lymphocytic activation molecule family member 1                                     | 1,052542574 | 4,865636128 | 49,95615179 | 5,31E-07 | 7,21E-06 |
| killer cell lectin-like receptor family I member 1                                            | 0,948625844 | 5,596701611 | 49,92036316 | 5,33E-07 | 7,21E-06 |
| HtrA serine peptidase 4                                                                       | 1,209816081 | 5,815036563 | 49,74982068 | 5,45E-07 | 7,28E-06 |
| RIKEN cDNA 2610019E17 gene                                                                    | 0,910477445 | 8,620024682 | 49,72042171 | 5,46E-07 | 7,28E-06 |
| a disintegrin-like and metallopeptidase (reprolysin type) with thrombospondin type 1 motif, 9 | 1,067638943 | 5,067932245 | 49,50843279 | 5,61E-07 | 7,41E-06 |
| promyelocytic leukemia                                                                        | 1,143609761 | 7,793898664 | 49,38806639 | 5,69E-07 | 7,46E-06 |
| insulin-like growth factor 2                                                                  | 0,960890113 | 5,041023508 | 48,54048799 | 6,31E-07 | 8,21E-06 |
| RIKEN cDNA 4833442J19 gene                                                                    | 1,100923957 | 6,278852469 | 48,21480844 | 6,57E-07 | 8,48E-06 |
| carbonic anhydrase 2                                                                          | 1,004567054 | 7,06945074  | 47,82909575 | 6,89E-07 | 8,84E-06 |
| tubulin, beta 6                                                                               | 1,260340898 | 11,27433302 | 47,67603299 | 7,02E-07 | 8,94E-06 |
| FK506 binding protein 1a                                                                      | 1,141356742 | 10,88308242 | 47,57177992 | 7,12E-07 | 8,99E-06 |
| solute carrier family 7 (cationic amino acid transporter, y+ system), member 5                | 1,270171329 | 7,470304939 | 46,82641194 | 7,82E-07 | 9,81E-06 |
| thyroglobulin                                                                                 | 1,114797072 | 5,080479537 | 46,50379739 | 8,15E-07 | 1,01E-05 |
| follicle-stimulating-like 1                                                                   | 1,368527808 | 5,942920908 | 46,29334019 | 8,37E-07 | 1,03E-05 |
| RIKEN cDNA 1700113I22 gene                                                                    | 1,142374654 | 5,731466242 | 46,01030769 | 8,68E-07 | 1,07E-05 |
| disabled homolog 2 (Drosophila)                                                               | 0,88216972  | 7,310611873 | 45,72174996 | 9,01E-07 | 1,10E-05 |
| TNF receptor associated factor 4                                                              | 0,792488159 | 5,066395376 | 45,59596846 | 9,16E-07 | 1,11E-05 |
| disabled homolog 2 (Drosophila)                                                               | 1,188646474 | 8,237515489 | 45,44492181 | 9,34E-07 | 1,12E-05 |
| mucosa associated lymphoid tissue lymphoma translocation gene 1                               | 1,210121089 | 8,55148934  | 45,08043017 | 9,80E-07 | 1,17E-05 |
| hypothetical LOC100504230                                                                     | 0,938024844 | 8,082307383 | 44,93832296 | 9,98E-07 | 1,18E-05 |
| hemolytic complement                                                                          | 1,45313421  | 5,192081678 | 44,89310435 | 1,00E-06 | 1,18E-05 |
| acyl-Coenzyme A dehydrogenase, medium chain                                                   | 1,302496908 | 8,565491338 | 44,14314494 | 1,11E-06 | 1,30E-05 |
| kelch-like 25 (Drosophila)                                                                    | 0,768657609 | 7,035544375 | 43,85513894 | 1,15E-06 | 1,34E-05 |
| Rap guanine nucleotide exchange factor (GEF) 5                                                | 1,020660513 | 5,406613075 | 43,47179845 | 1,21E-06 | 1,40E-05 |
| insulin-like growth factor I receptor                                                         | 1,010786447 | 6,039833127 | 43,42479843 | 1,22E-06 | 1,40E-05 |
| laminin, gamma 1                                                                              | 1,087939802 | 6,352036439 | 42,78314086 | 1,33E-06 | 1,52E-05 |
| matrix metallopeptidase 13                                                                    | 1,091964165 | 6,221666315 | 42,40793302 | 1,40E-06 | 1,59E-05 |
| transporter 2, ATP-binding cassette, sub-family B (MDR/TAP)                                   | 1,115926084 | 10,6006879  | 42,08301913 | 1,47E-06 | 1,65E-05 |

|                                                                                         |             |             |              |          |          |
|-----------------------------------------------------------------------------------------|-------------|-------------|--------------|----------|----------|
| torsin family 3, member A                                                               | 0,999524248 | 8,619649869 | 42,03338332  | 1,48E-06 | 1,65E-05 |
| integrin alpha V                                                                        | 1,053689859 | 5,251979705 | 41,96899477  | 1,49E-06 | 1,66E-05 |
| ubiquitin specific peptidase 53                                                         | 1,218396167 | 5,846647275 | 41,66272232  | 1,56E-06 | 1,72E-05 |
| FtsJ methyltransferase domain containing 2                                              | 1,187878597 | 11,18977427 | 41,38328298  | 1,62E-06 | 1,78E-05 |
| ST3 beta-galactoside alpha-2,3-sialyltransferase 1                                      | 1,325561617 | 7,992844102 | 40,87377104  | 1,74E-06 | 1,90E-05 |
| calcium and integrin binding 1 (calmyrin)                                               | 1,340943584 | 10,84024462 | 40,39920672  | 1,87E-06 | 2,02E-05 |
| adenosine deaminase, RNA-specific                                                       | 1,088489734 | 7,820296615 | 40,21588456  | 1,92E-06 | 2,06E-05 |
| carbohydrate sulfotransferase 11                                                        | 1,127976927 | 6,661397276 | 40,14512878  | 1,94E-06 | 2,07E-05 |
| castor homolog 1, zinc finger (Drosophila)                                              | 0,880230531 | 7,424599326 | 40,04021096  | 1,97E-06 | 2,09E-05 |
| transducin-like enhancer of split 1, homolog of Drosophila E(spl)                       | 1,043607988 | 5,634191442 | 39,93154658  | 2,00E-06 | 2,11E-05 |
| H2A histone family, member Y                                                            | 1,272665745 | 10,05267434 | 39,75134252  | 2,05E-06 | 2,15E-05 |
| calcium-binding tyrosine-(Y)-phosphorylation regulated (fibrousheathin 2)               | 1,393680302 | 7,469466396 | 39,4522088   | 2,14E-06 | 2,23E-05 |
| dual specificity phosphatase 8                                                          | 1,122585859 | 4,726560801 | 39,27538045  | 2,20E-06 | 2,28E-05 |
| methionyl aminopeptidase 1                                                              | 1,065173906 | 9,466756143 | 39,12186353  | 2,25E-06 | 2,30E-05 |
| inhibitor of DNA binding 2                                                              | 1,349999013 | 10,37578721 | 39,09643141  | 2,26E-06 | 2,30E-05 |
| WNK lysine deficient protein kinase 1                                                   | 1,30523309  | 10,05945803 | 39,0818337   | 2,26E-06 | 2,30E-05 |
| 2'-5' oligoadenylate synthetase 1G                                                      | 0,827588426 | 8,35100329  | 39,03018279  | 2,28E-06 | 2,31E-05 |
| solute carrier organic anion transporter family, member 3a1                             | 1,372081398 | 5,132632004 | 38,931545321 | 2,61E-06 | 2,62E-05 |
| chemokine (C-X-C motif) ligand 10                                                       | 1,20561396  | 5,463632042 | 37,92204672  | 2,69E-06 | 2,70E-05 |
| MARCKS-like 1                                                                           | 1,254491353 | 7,973987103 | 37,7811298   | 2,75E-06 | 2,74E-05 |
| deltex 2 homolog (Drosophila)                                                           | 1,177461835 | 7,415024493 | 37,73428818  | 2,77E-06 | 2,74E-05 |
| asparagine synthetase                                                                   | 0,974739142 | 6,112033544 | 37,38886576  | 2,92E-06 | 2,88E-05 |
| RIKEN cDNA 1700113I22 gene                                                              | 1,101379033 | 5,762155237 | 37,27643195  | 2,97E-06 | 2,91E-05 |
| tumor necrosis factor (ligand) superfamily, member 8                                    | 1,157233885 | 4,802543277 | 36,88479839  | 3,16E-06 | 3,07E-05 |
| arrestin domain containing 3                                                            | 1,076309955 | 5,922398555 | 36,85043269  | 3,18E-06 | 3,07E-05 |
| signal transducer and activator of transcription 3                                      | 1,227513778 | 9,967491897 | 36,70326583  | 3,25E-06 | 3,12E-05 |
| endothelin 1                                                                            | 1,074343176 | 4,851203637 | 36,6855701   | 3,26E-06 | 3,12E-05 |
| peripheral myelin protein 22                                                            | 1,288469426 | 7,447923154 | 36,59983681  | 3,31E-06 | 3,14E-05 |
| Z-DNA binding protein 1                                                                 | 1,041017977 | 5,111467927 | 36,58131837  | 3,31E-06 | 3,14E-05 |
| intermediate filament family orphan 2                                                   | 1,133526088 | 7,703310617 | 36,44754849  | 3,39E-06 | 3,18E-05 |
| RAB5A, member RAS oncogene family                                                       | 1,073586976 | 8,315740392 | 36,40564031  | 3,41E-06 | 3,19E-05 |
| solute carrier family 2 (facilitated glucose transporter), member 3                     | 0,791733625 | 5,519344105 | 36,37356097  | 3,42E-06 | 3,19E-05 |
| TLC domain containing 1                                                                 | 1,036466698 | 5,800566309 | 35,90251035  | 3,69E-06 | 3,41E-05 |
| thymoma viral proto-oncogene 3                                                          | 1,059712218 | 8,583332385 | 35,87937027  | 3,71E-06 | 3,41E-05 |
| prostaglandin-endoperoxide synthase 2                                                   | 1,140620116 | 5,081831438 | 35,85369647  | 3,72E-06 | 3,41E-05 |
| caspase 2                                                                               | 1,287374839 | 9,202737999 | 35,80880794  | 3,75E-06 | 3,41E-05 |
| topoisomerase (DNA) I                                                                   | 1,378842433 | 7,801252887 | 35,70147839  | 3,81E-06 | 3,45E-05 |
| metastasis associated in colon cancer 1                                                 | 1,258125897 | 5,251981686 | 35,59481228  | 3,88E-06 | 3,50E-05 |
| interleukin 15 receptor, alpha chain                                                    | 1,282614216 | 8,009815392 | 35,48126688  | 3,95E-06 | 3,53E-05 |
| ArfGAP with RhoGAP domain, ankyrin repeat and PH domain 2                               | 1,19590997  | 11,05788005 | 35,46518059  | 3,96E-06 | 3,53E-05 |
| RUN and SH3 domain containing 2                                                         | 0,911144636 | 8,920910043 | 35,39708397  | 4,00E-06 | 3,55E-05 |
| ubiquitin specific peptidase 18                                                         | 0,705585767 | 10,55898093 | 35,27927551  | 4,08E-06 | 3,60E-05 |
| solute carrier organic anion transporter family, member 3a1                             | 1,378890183 | 5,329690324 | 35,14942811  | 4,17E-06 | 3,63E-05 |
| deltex 3-like (Drosophila)                                                              | 1,329034191 | 8,163656961 | 35,12739699  | 4,18E-06 | 3,63E-05 |
| glutathione S-transferase omega 1                                                       | 1,195555838 | 13,04382365 | 35,10911929  | 4,19E-06 | 3,63E-05 |
| ubiquitin specific peptidase 18                                                         | 0,867524426 | 9,796427512 | 35,10351814  | 4,20E-06 | 3,63E-05 |
| CUGBP, Elav-like family member 6                                                        | 1,342204446 | 5,399219099 | 35,05942686  | 4,23E-06 | 3,64E-05 |
| integrin alpha 5 (fibronectin receptor alpha)                                           | 1,261052282 | 7,076798969 | 34,93300363  | 4,32E-06 | 3,68E-05 |
| phosphatidylinositol 3-kinase catalytic delta polypeptide                               | 0,984701144 | 6,638352617 | 34,91421317  | 4,33E-06 | 3,68E-05 |
| GLI-Kruppel family member GLI3                                                          | 1,173662095 | 8,064848737 | 34,89694029  | 4,34E-06 | 3,68E-05 |
| dual specificity phosphatase 8                                                          | 1,053886845 | 4,931462243 | 34,62984952  | 4,54E-06 | 3,83E-05 |
| phosphatidylinositol glycan anchor biosynthesis, class X                                | 1,026270834 | 10,61179456 | 34,59817818  | 4,56E-06 | 3,83E-05 |
| spermine oxidase                                                                        | 1,244274031 | 7,105375815 | 34,51029813  | 4,63E-06 | 3,86E-05 |
| adaptor protein, phosphotyrosine interaction, PH domain and leucine zipper containing 1 | 1,270532942 | 9,955562908 | 34,48689098  | 4,64E-06 | 3,86E-05 |
| UDP-N-acetyl-alpha-D-galactosamine:polypeptide N-acetylglactosaminyltransferase 10      | 1,011742473 | 5,978017405 | 34,32291666  | 4,77E-06 | 3,95E-05 |
| 2'-5' oligoadenylate synthetase 1G                                                      | 0,960939226 | 9,241592326 | 34,24440062  | 4,83E-06 | 3,98E-05 |
| poliovirus receptor-related 2                                                           | 1,207435375 | 7,076151514 | 34,01885827  | 5,02E-06 | 4,12E-05 |
| acyl-CoA synthetase long-chain family member 4                                          | 1,327249582 | 6,293696842 | 33,88901162  | 5,13E-06 | 4,19E-05 |
| signal transducer and activator of transcription 2                                      | 1,109297298 | 7,134583981 | 33,83931052  | 5,17E-06 | 4,20E-05 |
| myxovirus (influenza virus) resistance 2                                                | 1,134852681 | 6,703728672 | 33,81104151  | 5,20E-06 | 4,20E-05 |
| protein tyrosine phosphatase-like (proline instead of catalytic arginine), member a     | 1,031028171 | 7,832608781 | 33,56925221  | 5,41E-06 | 4,36E-05 |
| interleukin 15 receptor, alpha chain                                                    | 1,214610519 | 7,298998734 | 33,54020877  | 5,44E-06 | 4,36E-05 |
| ST3 beta-galactoside alpha-2,3-sialyltransferase 1                                      | 1,261913881 | 5,685387931 | 33,36946165  | 5,60E-06 | 4,46E-05 |
| leucine-rich repeats and calponin homology (CH) domain containing 1                     | 1,041408439 | 6,47211009  | 33,3435602   | 5,62E-06 | 4,46E-05 |
| antigen identified by monoclonal antibody Ki 67                                         | 1,253451574 | 5,318588263 | 33,27296387  | 5,69E-06 | 4,50E-05 |
| signal transducer and activator of transcription 3                                      | 1,362133456 | 10,4868321  | 32,96349051  | 6,00E-06 | 4,70E-05 |
| SAM domain, SH3 domain and nuclear localization signals, 1                              | 1,464570824 | 8,884903154 | 32,95973786  | 6,00E-06 | 4,70E-05 |
| gap junction protein, alpha 1                                                           | 1,13151828  | 8,238652591 | 32,79798464  | 6,17E-06 | 4,81E-05 |
| TNFAIP3 interacting protein 1                                                           | 0,785411788 | 9,963680135 | 32,58374658  | 6,40E-06 | 4,97E-05 |
| Vpr (HIV-1) binding protein                                                             | 1,102829063 | 6,583432444 | 32,41892467  | 6,59E-06 | 5,09E-05 |
| proviral integration site 1                                                             | 1,49532633  | 5,671622843 | 32,15207298  | 6,90E-06 | 5,31E-05 |
| phosphatidylinositol 3-kinase, regulatory subunit, polypeptide 1 (p85 alpha)            | 1,242160689 | 10,52055265 | 32,10259816  | 6,96E-06 | 5,33E-05 |
| TSC2 domain family, member 3                                                            | 0,930777858 | 8,757637201 | 31,95925774  | 7,14E-06 | 5,45E-05 |
| 2'-5' oligoadenylate synthetase-like 2                                                  | 0,91217967  | 5,039539372 | 31,88937788  | 7,23E-06 | 5,49E-05 |
| RAB12, member RAS oncogene family                                                       | 1,337724123 | 7,696550431 | 31,75520084  | 7,40E-06 | 5,58E-05 |
| F11 receptor                                                                            | 1,062162721 | 6,377023716 | 31,74827053  | 7,41E-06 | 5,58E-05 |
| myotubularin related protein 14                                                         | 1,291734542 | 7,154876568 | 31,60354782  | 7,60E-06 | 5,70E-05 |
| histocompatibility 2, O region beta locus                                               | 0,942935438 | 5,190162471 | 31,58219078  | 7,63E-06 | 5,70E-05 |
| decorin                                                                                 | 0,690879607 | 5,414210783 | 31,0732896   | 8,36E-06 | 6,21E-05 |
| cytochrome c oxidase, subunit XVII assembly protein homolog (yeast)                     | 1,239879165 | 12,47337066 | 31,04355845  | 8,41E-06 | 6,22E-05 |
| stromal membrane-associated GTPase-activating protein 2                                 | 1,174715707 | 11,79795675 | 30,93830756  | 8,57E-06 | 6,31E-05 |

|                                                                                          |             |             |             |          |             |
|------------------------------------------------------------------------------------------|-------------|-------------|-------------|----------|-------------|
| interferon regulatory factor 9                                                           | 1,226989664 | 9,204252757 | 30,77409396 | 8,82E-06 | 6,47E-05    |
| interferon regulatory factor 9                                                           | 1,037126031 | 7,494401661 | 30,75433637 | 8,86E-06 | 6,47E-05    |
| phosphatidylinositol-5-phosphate 4-kinase, type II, alpha MARCKS-like 1                  | 1,161150497 | 12,21697894 | 30,72117885 | 8,91E-06 | 6,48E-05    |
| proviral integration site 3                                                              | 1,348946806 | 7,125069416 | 30,60741337 | 9,10E-06 | 6,59E-05    |
| ubiquitin-conjugating enzyme E2L 6                                                       | 1,21647407  | 8,813844346 | 30,25454038 | 9,70E-06 | 7,00E-05    |
| ubiquitin-conjugating enzyme E2L 6                                                       | 1,216790275 | 7,747499357 | 30,23248526 | 9,74E-06 | 7,00E-05    |
| interleukin 17 receptor D                                                                | 1,385922713 | 5,005194816 | 30,21049506 | 9,78E-06 | 7,00E-05    |
| oncostatin M                                                                             | 1,57568306  | 5,700025655 | 30,03243872 | 1,01E-05 | 7,20E-05    |
| solute carrier family 22 (organic cation transporter), member 5                          | 1,259482575 | 7,446086029 | 29,98269792 | 1,02E-05 | 7,24E-05    |
| leucine zipper transcription factor-like 1                                               | 1,269455413 | 7,656884292 | 29,92170784 | 1,03E-05 | 7,29E-05    |
| RIKEN cDNA 1500003003 gene                                                               | 1,328963194 | 5,816077045 | 29,85120398 | 1,05E-05 | 7,34E-05    |
| transporter 1, ATP-binding cassette, sub-family B (MDR/TAP)                              | 0,957899231 | 7,005785611 | 29,84310065 | 1,05E-05 | 7,34E-05    |
| adenosine deaminase, RNA-specific                                                        | 1,047544397 | 7,295340377 | 29,63454032 | 1,09E-05 | 7,60E-05    |
| zinc finger homeobox 3                                                                   | 1,161933168 | 8,747776484 | 29,48295023 | 1,12E-05 | 7,78E-05    |
| predicted gene 6377                                                                      | 1,359320932 | 5,08042088  | 29,43498448 | 1,13E-05 | 7,82E-05    |
| acyl-CoA synthetase long-chain family member 4                                           | 1,224290219 | 7,11341777  | 29,34916905 | 1,15E-05 | 7,92E-05    |
| RIKEN cDNA 2310014L17 gene                                                               | 1,038028888 | 4,967111967 | 29,19099348 | 1,18E-05 | 8,13E-05    |
| claudin domain containing 1                                                              | 1,271301679 | 7,58468095  | 29,0405916  | 1,22E-05 | 8,33E-05    |
| RIKEN cDNA 2010002N04 gene                                                               | 1,907201199 | 6,114949955 | 28,89892358 | 1,25E-05 | 8,52E-05    |
| colony stimulating factor 3 (granulocyte)                                                | 0,979263938 | 4,916125708 | 28,76370269 | 1,28E-05 | 8,71E-05    |
| Max interacting protein 1                                                                | 1,82845187  | 6,860518174 | 28,72932003 | 1,29E-05 | 8,74E-05    |
| chemokine (C-X-C motif) ligand 16                                                        | 1,213820565 | 9,731606372 | 28,60228274 | 1,32E-05 | 8,92E-05    |
| basic leucine zipper transcription factor, ATF-like 3                                    | 0,772417396 | 7,931579506 | 28,38440326 | 1,38E-05 | 9,26E-05    |
| protein kinase inhibitor beta, cAMP dependent, testis specific density-regulated protein | 1,296436693 | 11,565316   | 28,35065383 | 1,39E-05 | 9,29E-05    |
| PDZK1 interacting protein 1                                                              | 1,179073483 | 5,377864814 | 28,32095672 | 1,40E-05 | 9,31E-05    |
| chemokine (C-X-C motif) receptor 5                                                       | 1,435335894 | 5,777833036 | 28,17870973 | 1,44E-05 | 9,53E-05    |
| RUN and SH3 domain containing 2                                                          | 0,977190988 | 4,898692412 | 28,11616637 | 1,45E-05 | 9,61E-05    |
| triosephosphate isomerase 1                                                              | 0,938705451 | 9,374205478 | 28,08468944 | 1,46E-05 | 9,63E-05    |
| zinc finger homeobox 3                                                                   | 1,297165926 | 10,77686616 | 28,06093091 | 1,47E-05 | 9,64E-05    |
| torsin A interacting protein 1                                                           | 1,068176955 | 6,848090968 | 27,97339614 | 1,50E-05 | 9,74E-05    |
| predicted gene 12250                                                                     | 1,077742457 | 8,733196246 | 27,97153997 | 1,50E-05 | 9,74E-05    |
| erythrocyte protein band 4.1-like 2                                                      | 1,073818697 | 5,12073885  | 27,73550296 | 1,57E-05 | 0,00010162  |
| ornithine decarboxylase, structural 1                                                    | 1,281428453 | 8,727690655 | 27,59046503 | 1,61E-05 | 0,000104186 |
| malate dehydrogenase 1, NAD (soluble)                                                    | 1,034131799 | 10,07464134 | 27,31626379 | 1,70E-05 | 0,000109617 |
| EGL nine homolog 3 (C. elegans)                                                          | 1,27969108  | 6,911642109 | 26,96993788 | 1,83E-05 | 0,000117072 |
| adaptor protein, phosphotyrosine interaction, PH domain and leucine zipper containing 1  | 1,710077907 | 6,125775351 | 26,88845714 | 1,86E-05 | 0,000118576 |
| TNFAIP3 interacting protein 1                                                            | 1,331211342 | 10,33030241 | 26,86959709 | 1,86E-05 | 0,000118591 |
| solute carrier family 35, member E1                                                      | 0,954414408 | 8,385136278 | 26,73420916 | 1,92E-05 | 0,000121445 |
| ubiquitin-conjugating enzyme E2L 6                                                       | 0,974817277 | 8,804268098 | 26,50834787 | 2,01E-05 | 0,000126703 |
| RIKEN cDNA 2400003C14 gene                                                               | 1,18657886  | 8,639806109 | 26,40201635 | 2,05E-05 | 0,000128713 |
| caspase 6                                                                                | 1,20900608  | 6,76841622  | 26,39602553 | 2,05E-05 | 0,000128713 |
| DENN/MADD domain containing 3                                                            | 1,006314677 | 8,594904451 | 26,36359418 | 2,07E-05 | 0,000129105 |
| amphiregulin                                                                             | 1,44405157  | 9,200357197 | 26,32409853 | 2,08E-05 | 0,000129689 |
| RNA binding motif protein 11                                                             | 1,279810396 | 5,332473679 | 26,06664664 | 2,20E-05 | 0,00013628  |
| signal transducer and activator of transcription 3                                       | 1,155673001 | 5,228177283 | 26,04044339 | 2,21E-05 | 0,000136533 |
| topoisomerase (DNA) I                                                                    | 1,18826984  | 8,302902992 | 26,01786012 | 2,22E-05 | 0,000136686 |
| PHD finger protein 11                                                                    | 1,195041314 | 5,003604103 | 25,97065323 | 2,24E-05 | 0,000137543 |
| Nedd4 family interacting protein 1                                                       | 1,387668739 | 7,366855966 | 25,85949971 | 2,29E-05 | 0,000140267 |
| TNF receptor-associated factor 3                                                         | 1,146540892 | 9,273338237 | 25,83485838 | 2,31E-05 | 0,000140295 |
| acidic (leucine-rich) nuclear phosphoprotein 32 family, member A                         | 0,890132749 | 9,072248725 | 25,82479471 | 2,31E-05 | 0,000140295 |
| Shwachman-Bodian-Diamond syndrome homolog (human)                                        | 1,784571576 | 6,977979039 | 25,80237817 | 2,32E-05 | 0,000140461 |
| folliculin-like 1                                                                        | 1,273111777 | 11,65726912 | 25,74813374 | 2,35E-05 | 0,000141568 |
| DNA segment, Chr 14, ERATO Doi 668, expressed                                            | 1,280936545 | 5,058198385 | 25,59867923 | 2,42E-05 | 0,00014557  |
| Nedd4 family interacting protein 1                                                       | 1,305345261 | 6,492762365 | 25,56879393 | 2,44E-05 | 0,000145981 |
| transducin (beta)-like 1 X-linked                                                        | 1,14043659  | 11,23163747 | 25,44279475 | 2,50E-05 | 0,000149395 |
| HOP homeobox                                                                             | 1,385468842 | 8,122426735 | 25,23887447 | 2,61E-05 | 0,000155412 |
| stromal membrane-associated GTPase-activating protein 2                                  | 1,015685116 | 5,075497827 | 25,22413897 | 2,62E-05 | 0,000155412 |
| hexokinase 2                                                                             | 1,100207868 | 7,901255558 | 25,12042046 | 2,68E-05 | 0,000158342 |
| inositol (myo)-1(or 4)-monophosphatase 2                                                 | 1,362312713 | 9,858194316 | 24,98774776 | 2,76E-05 | 0,000162345 |
| cytohesin 1                                                                              | 1,199773461 | 5,822175157 | 24,78458088 | 2,88E-05 | 0,000169019 |
| ring finger protein 114                                                                  | 1,001366011 | 7,982323232 | 24,75844252 | 2,90E-05 | 0,000169401 |
| lon peptidase 1, mitochondrial                                                           | 1,276007369 | 7,754684976 | 24,56951969 | 3,02E-05 | 0,000175336 |
| engulfment and cell motility 1, ced-12 homolog (C. elegans)                              | 0,964622875 | 6,692046032 | 24,5682795  | 3,02E-05 | 0,000175336 |
| transmembrane and coiled-coil domains 6                                                  | 0,925816766 | 9,90158136  | 24,48574533 | 3,07E-05 | 0,000177915 |
| family with sequence similarity 160, member B1                                           | 1,379382555 | 6,270138264 | 24,39353081 | 3,14E-05 | 0,000180924 |
| receptor (calcitonin) activity modifying protein 3                                       | 0,989292223 | 8,926151201 | 24,28823039 | 3,21E-05 | 0,000184525 |
| solute carrier family 22 (organic cation transporter), member 5                          | 1,18949376  | 11,95822454 | 24,16479482 | 3,30E-05 | 0,000188966 |
| notum pectinacetyltransferase homolog (Drosophila)                                       | 1,401009242 | 6,410287166 | 24,11504313 | 3,33E-05 | 0,000189814 |
| alpha-kinase 2                                                                           | 0,911384466 | 4,852849708 | 24,11449308 | 3,33E-05 | 0,000189814 |
| ZXD family zinc finger C                                                                 | 0,873427242 | 5,470971533 | 24,00907948 | 3,41E-05 | 0,000193645 |
| phosphofructokinase, platelet                                                            | 0,970267604 | 6,407625076 | 23,97979752 | 3,43E-05 | 0,000194232 |
| microtubule associated serine/threonine kinase family member 4                           | 1,220604867 | 7,386856943 | 23,96587197 | 3,44E-05 | 0,000194232 |
| peroxiredoxin 4                                                                          | 1,275754972 | 5,771308214 | 23,94120962 | 3,46E-05 | 0,000194662 |
| phosphoinositide-3-kinase, regulatory subunit 6                                          | 1,052918476 | 11,37638027 | 23,91805738 | 3,48E-05 | 0,00019503  |
| RIKEN cDNA 2400003C14 gene                                                               | 1,283346809 | 6,927676058 | 23,83595018 | 3,55E-05 | 0,000197531 |
| receptor (calcitonin) activity modifying protein 3                                       | 1,322988384 | 11,20191066 | 23,81907211 | 3,56E-05 | 0,000197531 |
| solute carrier family 9 (sodium/hydrogen exchanger), member 3 regulator 1                | 1,16564042  | 11,29553685 | 23,8172063  | 3,56E-05 | 0,000197531 |
| ADP-ribosylarginine hydrolase                                                            | 1,223846861 | 10,52801772 | 23,72554122 | 3,63E-05 | 0,000200928 |
| actinin, alpha 1                                                                         | 1,343631084 | 11,48173006 | 23,69572278 | 3,66E-05 | 0,000200928 |
| RAB26, member RAS oncogene family                                                        | 1,30184378  | 12,63523806 | 23,69454953 | 3,66E-05 | 0,000200928 |
|                                                                                          | 1,101733294 | 5,170200678 | 23,68361061 | 3,67E-05 | 0,000200928 |

|                                                                                                 |             |             |             |             |             |
|-------------------------------------------------------------------------------------------------|-------------|-------------|-------------|-------------|-------------|
| expressed sequence AU022252                                                                     | 1,367112682 | 6,769177611 | 23,56843343 | 3,76E-05    | 0,000205526 |
| WNK lysine deficient protein kinase 1                                                           | 1,49743935  | 5,691748232 | 23,54543469 | 3,78E-05    | 0,00020594  |
| FERM domain containing 6                                                                        | 1,207608248 | 5,930104578 | 23,4998724  | 3,82E-05    | 0,000206985 |
| WW domain containing transcription regulator 1                                                  | 0,819520019 | 5,024574752 | 23,49499863 | 3,83E-05    | 0,000206985 |
| gap junction protein, beta 2                                                                    | 1,098479153 | 4,757225901 | 23,46454104 | 3,85E-05    | 0,000207759 |
| phosphatidylinositol 3-kinase, regulatory subunit, polypeptide 1 (p85 alpha)                    | 1,118795791 | 10,50449226 | 23,30834311 | 3,99E-05    | 0,000214545 |
| RAB34, member of RAS oncogene family                                                            | 0,823486048 | 6,454603791 | 23,27662252 | 4,02E-05    | 0,000215422 |
| acyl-CoA synthetase long-chain family member 4                                                  | 1,138591672 | 5,094679778 | 23,16872605 | 4,12E-05    | 0,00022008  |
| ATPase type 13A4                                                                                | 1,177815496 | 5,047949534 | 22,99933358 | 4,28E-05    | 0,00022804  |
| zinc fingers and homeoboxes 2                                                                   | 1,263638442 | 5,898610263 | 22,98089764 | 4,30E-05    | 0,000228301 |
| basic helix-loop-helix family, member e40                                                       | 1,218654657 | 12,39923241 | 22,9450007  | 4,34E-05    | 0,000229275 |
| DEAD (Asp-Glu-Ala-Asp) box polypeptide 24                                                       | 1,190959836 | 7,368070314 | 22,93558706 | 4,34E-05    | 0,000229275 |
| non imprinted in Prader-Willi/Angelman syndrome 1 homolog (human)                               | 1,243634704 | 8,333915658 | 22,91514831 | 4,36E-05    | 0,000229651 |
| proteasome (prosome, macropain) subunit, beta type 8 (large multifunctional peptidase 7)        | 1,216125789 | 9,434567813 | 22,89485744 | 4,39E-05    | 0,000230023 |
| integrin alpha L                                                                                | 1,482220443 | 5,660942892 | 22,83915106 | 4,44E-05    | 0,000231869 |
| predicted gene 4951                                                                             | 1,002193674 | 4,766526857 | 22,83374307 | 4,45E-05    | 0,000231869 |
| myeloid nuclear differentiation antigen like                                                    | 1,16930228  | 5,208510358 | 22,71888261 | 4,57E-05    | 0,000236697 |
| RIKEN cDNA 2010106G01 gene                                                                      | 1,101815558 | 4,885818719 | 22,70034165 | 4,59E-05    | 0,000236697 |
| G-protein coupled receptor 65                                                                   | 1,320114624 | 10,16404431 | 22,69985044 | 4,59E-05    | 0,000236697 |
| RalBP1 associated Eps domain containing protein                                                 | 1,262499205 | 9,763870788 | 22,69234514 | 4,59E-05    | 0,000236697 |
| zinc finger E-box binding homeobox 1                                                            | 1,215373713 | 9,223342262 | 22,66856891 | 4,62E-05    | 0,000237294 |
| lectin, galactoside-binding, soluble, 3 binding protein                                         | 1,330379457 | 10,79694552 | 22,59004158 | 4,77E-05    | 0,00024431  |
| activating transcription factor 4                                                               | 1,034370766 | 9,36862426  | 22,44390653 | 4,87E-05    | 0,000248317 |
| casein kinase 1, delta                                                                          | 1,401368769 | 6,657916118 | 22,43475593 | 4,88E-05    | 0,000248317 |
| histocompatibility 2, M region locus 3                                                          | 1,238440655 | 9,894675555 | 22,38881007 | 4,93E-05    | 0,000250256 |
| density-regulated protein                                                                       | 1,062950286 | 6,315423288 | 22,34000699 | 4,99E-05    | 0,000253284 |
| AT-hook transcription factor                                                                    | 1,191419353 | 8,483508463 | 22,107664   | 5,27E-05    | 0,000265753 |
| interferon regulatory factor 8                                                                  | 1,285696513 | 11,24636995 | 22,03053588 | 5,36E-05    | 0,000269847 |
| S100 calcium binding protein A10 (calpactin)                                                    | 1,150177065 | 10,4460738  | 21,87679501 | 5,56E-05    | 0,000279046 |
| PTC7 protein phosphatase homolog (S. cerevisiae)                                                | 1,083823306 | 10,49896826 | 21,74710625 | 5,74E-05    | 0,000286799 |
| RIKEN cDNA 6330416G13 gene                                                                      | 0,926132688 | 8,031545332 | 21,73743836 | 5,75E-05    | 0,000286799 |
| glutamate dehydrogenase 1                                                                       | 1,147126379 | 9,12570985  | 21,71153793 | 5,78E-05    | 0,000287749 |
| NIMA (never in mitosis gene a)-related expressed kinase 8                                       | 1,194962226 | 5,906471453 | 21,56190699 | 6,00E-05    | 0,000297395 |
| pleckstrin and Sec7 domain containing 3                                                         | 1,035660511 | 4,756582181 | 21,53230448 | 6,04E-05    | 0,000298663 |
| cyclin-dependent kinase inhibitor 1A (P21)                                                      | 0,880813773 | 9,343394384 | 21,44979209 | 6,16E-05    | 0,000303788 |
| spermatogenesis associated 2-like                                                               | 1,085369046 | 6,254463177 | 21,41742116 | 6,21E-05    | 0,0003035   |
| TNF receptor-associated factor 3                                                                | 0,937085345 | 8,775043669 | 21,34446262 | 6,32E-05    | 0,000309852 |
| RIKEN cDNA 4930539E08 gene                                                                      | 1,16373651  | 5,033097602 | 21,27136739 | 6,43E-05    | 0,00031386  |
| cyclin-dependent kinase 1                                                                       | 0,829450758 | 6,925122147 | 21,26812082 | 6,44E-05    | 0,00031386  |
| glutathione S-transferase, theta 4                                                              | 0,987957058 | 4,905418488 | 21,21288928 | 6,52E-05    | 0,000316939 |
| RNA binding protein gene with multiple splicing                                                 | 1,302091549 | 6,502524003 | 21,20482105 | 6,54E-05    | 0,000316939 |
| procollagen-proline, 2-oxoglutarate 4-dioxygenase (proline 4-hydroxylase), alpha II polypeptide | 0,966439274 | 7,595137612 | 21,1565423  | 6,61E-05    | 0,00031979  |
| ERBB receptor feedback inhibitor 1                                                              | 0,811256287 | 8,133766286 | 21,0618755  | 6,77E-05    | 0,000326354 |
| Bardet-Biedl syndrome 4 (human)                                                                 | 1,011799289 | 6,863067881 | 20,88259154 | 7,07E-05    | 0,000339589 |
| rearranged L-myc fusion sequence                                                                | 1,075640411 | 5,639600351 | 20,87716584 | 7,08E-05    | 0,000339589 |
| WAS/WASL interacting protein family, member 1                                                   | 1,143614023 | 10,30694503 | 20,839808   | 7,15E-05    | 0,000341781 |
| alanyl-tRNA synthetase                                                                          | 0,947424476 | 9,779554038 | 20,74278744 | 7,32E-05    | 0,000349103 |
| transcriptional regulator, SIN3B (yeast)                                                        | 1,155286214 | 8,571494652 | 20,62941522 | 7,53E-05    | 0,000358064 |
| RAB guanine nucleotide exchange factor (GEF) 1                                                  | 1,085545057 | 10,45255268 | 20,5970802  | 7,59E-05    | 0,000358622 |
| RAB34, member of RAS oncogene family                                                            | 1,125166696 | 4,909066296 | 20,59182395 | 7,60E-05    | 0,000358622 |
| N(alpha)-acetyltransferase 25, NatB auxiliary subunit                                           | 1,22896966  | 7,171080482 | 20,57983132 | 7,62E-05    | 0,000358622 |
| HECT domain containing 2                                                                        | 0,942539918 | 4,842868095 | 20,5791806  | 7,62E-05    | 0,000358622 |
| neuroligin 2                                                                                    | 1,025676702 | 6,000461801 | 20,52745258 | 7,72E-05    | 0,000361998 |
| alcohol dehydrogenase 4 (class II), pi polypeptide                                              | 1,337718022 | 5,147028895 | 20,51980025 | 7,74E-05    | 0,000361998 |
| WD repeat domain 33                                                                             | 1,162019777 | 5,21416608  | 20,43353385 | 7,91E-05    | 0,000368885 |
| ADP-ribosylation factor-like 5A                                                                 | 1,36014173  | 9,309080088 | 20,40987367 | 7,95E-05    | 0,000370078 |
| ADP-ribosylation factor-like 4C                                                                 | 1,001798426 | 9,814069509 | 20,37444131 | 8,02E-05    | 0,000372376 |
| DEAD (Asp-Glu-Ala-Asp) box polypeptide 19b                                                      | 1,257822105 | 5,717420424 | 20,25747748 | 8,26E-05    | 0,000381906 |
| family with sequence similarity 46, member A                                                    | 0,9597788   | 5,138488471 | 20,25257606 | 8,27E-05    | 0,000381906 |
| DNA segment, Chr 6, Miriam Meisler 5, expressed                                                 | 1,504055796 | 5,133985322 | 20,17635159 | 8,43E-05    | 0,000388282 |
| N-acetylglucosamine-1-phosphate transferase, alpha and beta subunits                            | 1,076375356 | 6,957925739 | 20,10054181 | 8,60E-05    | 0,000394583 |
| transmembrane protein 218                                                                       | 0,977208002 | 6,11904505  | 20,09172272 | 8,62E-05    | 0,000394583 |
| PAN2 polyA specific ribonuclease subunit homolog (S. cerevisiae)                                | 1,047080203 | 6,87259366  | 20,07309196 | 8,66E-05    | 0,000395404 |
| histone cluster 2, H2ac                                                                         | 1,103467363 | 7,296103446 | 20,00896854 | 8,80E-05    | 0,000400834 |
| latent transforming growth factor beta binding protein 1                                        | 1,440950435 | 5,181322405 | 19,9053457  | 9,03E-05    | 0,000410469 |
| sterol carrier protein 2, liver                                                                 | 0,943122318 | 6,613169506 | 19,84493428 | 9,18E-05    | 0,000415759 |
| RAP1 GTPase activating protein 2                                                                | 0,994919632 | 5,193026613 | 19,81819842 | 9,24E-05    | 0,000417519 |
| basic helix-loop-helix family, member e40                                                       | 1,180779615 | 12,06808351 | 19,77170582 | 9,35E-05    | 0,00042142  |
| torsin family 3, member A                                                                       | 0,885515524 | 6,402763349 | 19,7366889  | 9,43E-05    | 0,00042118  |
| thymidylate synthase                                                                            | 1,677117371 | 5,804166494 | 19,72296226 | 9,47E-05    | 0,000424513 |
| thioredoxin domain containing 12 (endoplasmic reticulum)                                        | 1,288667757 | 8,244074828 | 19,69261906 | 9,54E-05    | 0,00042673  |
| spermine oxidase                                                                                | 1,122160877 | 6,872429395 | 19,61114506 | 9,74E-05    | 0,000434655 |
| inositol 1,4,5-trisphosphate 3-kinase C                                                         | 0,885546116 | 7,500526099 | 19,58783716 | 9,80E-05    | 0,000436153 |
| neuregulin 4                                                                                    | 0,898766978 | 4,858954627 | 19,56444952 | 9,86E-05    | 0,00043767  |
| suppressor of cytokine signaling 2                                                              | 1,32731258  | 12,1944278  | 19,52940309 | 9,95E-05    | 0,000439679 |
| transmembrane protein 65                                                                        | 0,842886258 | 8,266037855 | 19,52695083 | 9,96E-05    | 0,000439679 |
| SET domain containing 3                                                                         | 1,357493162 | 7,797088939 | 19,50689947 | 0,000100087 | 0,000440842 |
| RIKEN cDNA 1500011B03 gene                                                                      | 1,030391353 | 7,027254463 | 19,42150547 | 0,000102329 | 0,000449571 |
| transmembrane protein 110                                                                       | 1,356356548 | 7,319377129 | 19,39675149 | 0,000102989 | 0,000451327 |
| N(alpha)-acetyltransferase 25, NatB auxiliary subunit                                           | 1,120095965 | 7,541128374 | 19,24206771 | 0,000107229 | 0,000467863 |
| vestigial like 4 (Drosophila)                                                                   | 1,318742126 | 6,196907668 | 19,23941309 | 0,000107303 | 0,000467863 |



|                                                                    |             |             |             |             |             |
|--------------------------------------------------------------------|-------------|-------------|-------------|-------------|-------------|
| tetratricopeptide repeat domain 39B                                | 1,089271502 | 6,74548944  | 19,22204958 | 0,000107792 | 0,000468813 |
| spermine oxidase                                                   | 1,11401597  | 10,15863799 | 19,11032279 | 0,000110998 | 0,000481547 |
| phosphodiesterase 4B, cAMP specific                                | 1,095883579 | 5,504206165 | 19,01654785 | 0,000113773 | 0,000492354 |
| growth differentiation factor 15                                   | 1,017609084 | 7,605994377 | 18,97513611 | 0,000115024 | 0,000493619 |
| acyl-Coenzyme A binding domain containing 4                        | 1,146103822 | 5,40988529  | 18,96793023 | 0,000115244 | 0,000493619 |
| N(alpha)-acetyltransferase 25, NatB auxiliary subunit              | 1,075674487 | 8,032256059 | 18,96447993 | 0,000124215 | 0,000493619 |
| tumor protein D52-like 2                                           | 1,069419735 | 7,17683573  | 18,95542642 | 0,000115625 | 0,000493619 |
| PDZ and LIM domain 5                                               | 1,27065051  | 7,076230268 | 18,95343085 | 0,000115686 | 0,000493619 |
| Trk-fused gene                                                     | 1,319993734 | 10,17099172 | 18,95048218 | 0,000115777 | 0,000493619 |
| nuclear distribution gene C homolog (Aspergillus)                  | 0,72702208  | 6,483765171 | 18,91081724 | 0,000116999 | 0,000497604 |
| signal-induced proliferation-associated 1 like 3                   | 1,081416995 | 6,35728116  | 18,88230567 | 0,000117886 | 0,00050015  |
| poliovirus receptor-related 2                                      | 1,181016484 | 6,384516033 | 18,79809538 | 0,000120553 | 0,000510215 |
| serine/threonine kinase 40                                         | 1,250813805 | 9,692106011 | 18,71687044 | 0,000123192 | 0,000520109 |
| AF4/FMR2 family, member 1                                          | 0,947518354 | 8,425716295 | 18,68589842 | 0,000124215 | 0,000523153 |
| RIKEN cDNA 4833439L19 gene                                         | 1,31878866  | 9,337315048 | 18,66925558 | 0,000124769 | 0,000524211 |
| arginase, liver                                                    | 1,255001636 | 5,08665013  | 18,65519724 | 0,000125239 | 0,000524223 |
| zinc ribbon domain containing, 1                                   | 1,290667054 | 7,781977314 | 18,65102051 | 0,000125379 | 0,000524223 |
| HemK methyltransferase family member 1                             | 1,055054586 | 6,518801507 | 18,61147972 | 0,000126714 | 0,000527626 |
| spermatogenesis associated 6                                       | 1,13743356  | 7,249829344 | 18,6089197  | 0,000126801 | 0,000527626 |
| cathepsin C                                                        | 0,967908811 | 9,35620085  | 18,56109653 | 0,000128439 | 0,000533159 |
| twisted gastrulation homolog 1 (Drosophila)                        | 1,245721808 | 9,944903637 | 18,53948221 | 0,000129187 | 0,000534982 |
| hypothetical LOC641240                                             | 1,066239854 | 14,03394009 | 18,4353537  | 0,000132862 | 0,000548886 |
| phosphoglycerate mutase 2                                          | 1,292273164 | 5,080506725 | 18,3785202  | 0,000134918 | 0,000556054 |
| zinc finger, MYND-type containing 8                                | 1,151564672 | 5,947671983 | 18,3178786  | 0,000137152 | 0,00056392  |
| PAN2 polyA specific ribonuclease subunit homolog (S. cerevisiae)   | 0,950696226 | 5,982737281 | 18,30454663 | 0,000137649 | 0,000564622 |
| tripartite motif-containing 36                                     | 1,221691156 | 6,767305576 | 18,27355549 | 0,000138778 | 0,000567908 |
| TBC1 domain family, member 7                                       | 1,317475763 | 7,723859264 | 18,25791822 | 0,000139403 | 0,00056912  |
| ring finger protein 34                                             | 1,181226108 | 5,91613941  | 18,20255843 | 0,000141519 | 0,000576334 |
| transcobalamin 2                                                   | 1,270353576 | 6,5793248   | 18,18592063 | 0,000142162 | 0,000576334 |
| aprataxin                                                          | 0,815411561 | 5,581716407 | 18,18513856 | 0,000142193 | 0,000576334 |
| PRELI domain containing 2                                          | 1,382038925 | 5,116597828 | 18,15913885 | 0,000143205 | 0,000576334 |
| Hermansky-Pudlak syndrome 6                                        | 1,11368756  | 8,6270726   | 18,15841569 | 0,000143233 | 0,000576334 |
| macrophage erythroblast attacher                                   | 1,097102361 | 7,556128169 | 18,1568902  | 0,000143293 | 0,000576334 |
| predicted gene, 20107                                              | 1,097525464 | 4,858556225 | 18,14931211 | 0,000143589 | 0,000576334 |
| CD274 antigen                                                      | 1,133934158 | 12,21336839 | 18,13662936 | 0,000144088 | 0,000576334 |
| tudor domain containing 7                                          | 1,191734909 | 10,2966782  | 18,13461567 | 0,000144167 | 0,000576334 |
| RIKEN cDNA B230312A22 gene                                         | 0,847094966 | 6,711816156 | 18,09984768 | 0,000145544 | 0,000580185 |
| RIKEN cDNA 4632411B12 gene                                         | 1,195228517 | 9,134504594 | 18,09340414 | 0,00014558  | 0,000580185 |
| DNA segment, Chr 3, Brigham & Women's Genetics 0562 expressed      | 1,346278644 | 5,946475796 | 18,04885456 | 0,00014759  | 0,00058596  |
| peroxisomal biogenesis factor 5                                    | 0,843668111 | 6,094242402 | 17,98404335 | 0,000150239 | 0,000594806 |
| AE binding protein 2                                               | 0,796252901 | 4,833424859 | 17,97759691 | 0,000150506 | 0,000594806 |
| h-2 class I histocompatibility antigen, K-W28 alpha chain-like     | 1,297775201 | 7,932615315 | 17,95979189 | 0,000151244 | 0,000596364 |
| RIKEN cDNA 2810474O19 gene                                         | 1,292972097 | 6,63283554  | 17,94661072 | 0,000151794 | 0,000597171 |
| B-cell leukemia/lymphoma 3                                         | 1,108420588 | 7,118746197 | 17,7775318  | 0,000159051 | 0,000624301 |
| guanylate binding protein 7                                        | 0,954997444 | 4,652186381 | 17,75385069 | 0,000160098 | 0,000625631 |
| activated leukocyte cell adhesion molecule                         | 1,033993113 | 7,671001634 | 17,74747759 | 0,000160382 | 0,000625631 |
| RIKEN cDNA 4933407C03 gene                                         | 1,244943611 | 9,074799134 | 17,74540682 | 0,000160474 | 0,000625631 |
| myotubularin related protein 14                                    | 1,032103674 | 9,515732648 | 17,65416845 | 0,000164597 | 0,000640034 |
| guanine nucleotide binding protein, alpha q polypeptide            | 0,860783616 | 5,580183556 | 17,64219996 | 0,000165146 | 0,000640034 |
| mesoderm induction early response 1 homolog (Xenopus laevis)       | 1,160840759 | 8,447944729 | 17,63935203 | 0,000165277 | 0,000640034 |
| trimethylguanosine synthase homolog (S. cerevisiae)                | 1,432893302 | 6,24127523  | 17,62552687 | 0,000165916 | 0,000641072 |
| BCL2-like 11 (apoptosis facilitator)                               | 1,23913177  | 5,112661531 | 17,60915681 | 0,000166675 | 0,000642572 |
| triple functional domain (PTPRF interacting)                       | 0,955108813 | 9,977048381 | 17,57304593 | 0,000168364 | 0,000647642 |
| cystatin F (leukocystatin)                                         | 1,350374893 | 5,372630179 | 17,52565718 | 0,000170611 | 0,000654829 |
| macrophage migration inhibitory factor                             | 1,433039729 | 13,44463852 | 17,50156137 | 0,000171767 | 0,000657806 |
| ZXD family zinc finger C                                           | 1,011550138 | 7,032637244 | 17,47364222 | 0,000173117 | 0,000661513 |
| symplekin                                                          | 0,802024418 | 6,747317494 | 17,46361963 | 0,000173605 | 0,000661916 |
| receptor (calcitonin) activity modifying protein 3                 | 1,196046063 | 9,273087103 | 17,4326749  | 0,00017512  | 0,000666227 |
| membrane magnesium transporter 2                                   | 1,221544144 | 7,801219099 | 17,38438951 | 0,000177516 | 0,000673859 |
| calcium regulated heat stable protein 1                            | 0,834401059 | 7,635653342 | 17,33861798 | 0,000179821 | 0,000681117 |
| serine (or cysteine) peptidase inhibitor, clade A, member 3G       | 0,961442281 | 7,484698723 | 17,30373198 | 0,000181601 | 0,000686358 |
| leucine rich repeat containing 33                                  | 0,906112215 | 11,05859208 | 17,14159787 | 0,000190145 | 0,000717081 |
| phosphoglycerate kinase 1                                          | 1,359875341 | 5,417994539 | 17,07721134 | 0,000193665 | 0,000728768 |
| uridine-cytidine kinase 1                                          | 1,315835689 | 7,363155124 | 17,03616937 | 0,000195947 | 0,000732862 |
| proteasome (prosome, macropain) 26S subunit, non-ATPase, 11        | 1,375959494 | 7,280518809 | 17,02436135 | 0,000196661 | 0,000732862 |
| RNA binding protein gene with multiple splicing                    | 0,996680482 | 7,542215812 | 17,02309232 | 0,000196681 | 0,000732862 |
| GLIS family zinc finger 3                                          | 1,006117234 | 4,861841031 | 17,0213677  | 0,000196778 | 0,000732862 |
| TSC22 domain family, member 3                                      | 0,910208864 | 6,472094487 | 17,01974604 | 0,000196869 | 0,000732862 |
| eukaryotic translation initiation factor 3, subunit C              | 1,401049685 | 8,853179774 | 17,01117859 | 0,000197352 | 0,000733083 |
| actin, beta                                                        | 1,277697069 | 13,37954843 | 16,95872333 | 0,000200339 | 0,000742585 |
| nudix (nucleoside diphosphate linked moiety X)-type motif 4        | 1,140479476 | 8,037304895 | 16,90114515 | 0,000203678 | 0,000753347 |
| inositol 1,4,5-triphosphate receptor interacting protein           | 0,971702786 | 7,031662847 | 16,89100875 | 0,000204272 | 0,000753934 |
| RAB5A, member RAS oncogene family                                  | 1,257882944 | 9,679116383 | 16,88255685 | 0,000204769 | 0,00075416  |
| transient receptor potential cation channel, subfamily V, member 4 | 0,935731635 | 5,981383828 | 16,85695179 | 0,000206284 | 0,000756799 |
| ArfGAP with RhoGAP domain, ankyrin repeat and PH domain 2          | 1,373837461 | 5,431763253 | 16,85566654 | 0,00020636  | 0,000756799 |
| RIKEN cDNA 5031414D18 gene                                         | 0,874137092 | 5,863115266 | 16,8097952  | 0,000209106 | 0,000763906 |
| dual specificity phosphatase 2                                     | 1,147520519 | 5,926347217 | 16,80856216 | 0,000209181 | 0,000763906 |
| squalene epoxidase                                                 | 1,464131538 | 7,180657139 | 16,76356112 | 0,000211917 | 0,000772269 |
| spermine oxidase                                                   | 1,06943043  | 10,44039358 | 16,70967599 | 0,000215247 | 0,000780184 |
| tripartite motif-containing 21                                     | 1,199216458 | 7,542133986 | 16,69720757 | 0,000216026 | 0,000780184 |
| phosphate cytidyltransferase 1, choline, alpha isoform             | 1,573949357 | 8,318589131 | 16,69002482 | 0,000216477 | 0,000780184 |



|                                                                                             |             |             |             |             |             |
|---------------------------------------------------------------------------------------------|-------------|-------------|-------------|-------------|-------------|
| ST8 alpha-N-acetyl-neuraminidase alpha-2,8-sialyltransferase 4                              | 1,270940405 | 10,75479635 | 16,68927026 | 0,000216524 | 0,000780184 |
| sema domain, immunoglobulin domain (Ig), transmembrane domain (TM) and short cytoplasmic dc | 1,180048283 | 9,649179327 | 16,6859585  | 0,000216732 | 0,000780184 |
| triosephosphate isomerase 1                                                                 | 1,227120723 | 12,55516216 | 16,6849927  | 0,000216793 | 0,000780184 |
| coenzyme Q10 homolog B ( <i>S. cerevisiae</i> )                                             | 1,323582317 | 8,916823878 | 16,64344007 | 0,000219424 | 0,000788013 |
| expressed sequence AU022252                                                                 | 1,297355239 | 5,945644521 | 16,57244297 | 0,000224004 | 0,000802796 |
| pre-B-cell leukemia transcription factor interacting protein 1                              | 1,359845236 | 9,784159714 | 16,55950618 | 0,00022485  | 0,000804165 |
| ER degradation enhancer, mannosidase alpha-like 1                                           | 1,292070657 | 7,158003029 | 16,53447108 | 0,000226498 | 0,000808389 |
| fucosyltransferase 8                                                                        | 1,279014823 | 6,577013589 | 16,52113857 | 0,000227382 | 0,000809873 |
| histocompatibility 2, class II antigen A, beta 1                                            | 0,971328085 | 13,40564416 | 16,48908873 | 0,000229522 | 0,000815816 |
| Smg-7 homolog, nonsense mediated mRNA decay factor ( <i>C. elegans</i> )                    | 1,140060539 | 8,222333659 | 16,4780534  | 0,000230264 | 0,000816641 |
| activating transcription factor 4                                                           | 1,033279513 | 10,99424349 | 16,47162372 | 0,000230698 | 0,000816641 |
| ras homolog gene family, member U                                                           | 0,935714291 | 4,683184393 | 16,39402601 | 0,000236006 | 0,000833727 |
| phosphatidylglycerophosphate synthase 1                                                     | 1,002209679 | 10,76588735 | 16,38447542 | 0,000236669 | 0,000834367 |
| proteasome (prosome, macropain) subunit, beta type 8 (large multifunctional peptidase 7)    | 1,235152969 | 13,34034999 | 16,37237588 | 0,000237512 | 0,000835637 |
| insulin-like growth factor binding protein 4                                                | 1,172549243 | 8,616177567 | 16,35131609 | 0,000238987 | 0,000839122 |
| Bardet-Biedl syndrome 2 (human)                                                             | 1,147229409 | 5,556661431 | 16,28832035 | 0,000243464 | 0,00085311  |
| coiled-coil domain containing 51                                                            | 0,879123682 | 5,103820817 | 16,27225158 | 0,000244621 | 0,000855434 |
| zinc finger protein 945                                                                     | 1,020387587 | 8,248330854 | 16,16891454 | 0,000252216 | 0,000880214 |
| phosphoglycerate kinase 1                                                                   | 1,304012618 | 11,4708328  | 16,14533935 | 0,000253987 | 0,000884609 |
| KRIT1, ankyrin repeat containing                                                            | 1,228924811 | 6,134438812 | 16,11859378 | 0,000256012 | 0,000889874 |
| annexin A13                                                                                 | 0,952663402 | 4,755781529 | 16,10021029 | 0,000257415 | 0,000892958 |
| family with sequence similarity 129, member A                                               | 1,291015779 | 8,237880415 | 16,09250296 | 0,000258006 | 0,000893217 |
| small nuclear ribonucleoprotein 27 (U4/U6.U5)                                               | 1,307224724 | 6,788459354 | 16,06981684 | 0,000259754 | 0,000897475 |
| PTPRF interacting protein, binding protein 1 (liprin beta 1)                                | 0,849388675 | 7,125488364 | 16,04072787 | 0,000262016 | 0,000903485 |
| chemokine (C-X-C motif) ligand 16                                                           | 1,134912092 | 13,01405318 | 15,918748   | 0,000271749 | 0,000935182 |
| myeloid/lymphoid or mixed-lineage leukemia 1                                                | 1,362189043 | 7,017194119 | 15,8236771  | 0,000272719 | 0,000952115 |
| neuregulin 4                                                                                | 0,894573967 | 4,724303086 | 15,79067478 | 0,000282416 | 0,000968045 |
| MARCKS-like 1                                                                               | 1,170511149 | 10,2937444  | 15,76777719 | 0,000284374 | 0,000972828 |
| TRAF family member-associated Nf-kappa B activator                                          | 1,432261182 | 8,282201514 | 15,75452325 | 0,000285514 | 0,000974802 |
| RPTOR independent companion of MTOR, complex 2                                              | 1,205505917 | 8,591897772 | 15,72787263 | 0,000287822 | 0,000980749 |
| chromodomain helicase DNA binding protein 7                                                 | 1,2851026   | 6,779026011 | 15,71270905 | 0,000289145 | 0,000983321 |
| inositol hexaphosphate kinase 3                                                             | 0,896149977 | 5,078984471 | 15,6912834  | 0,000291027 | 0,000987779 |
| thioredoxin-like 4A                                                                         | 1,151382876 | 8,73925086  | 15,67994283 | 0,000292028 | 0,000989238 |
| TAP binding protein                                                                         | 1,245224334 | 6,643095259 | 15,6711787  | 0,000292805 | 0,000989932 |
| LSM1 homolog, U6 small nuclear RNA associated ( <i>S. cerevisiae</i> )                      | 1,236742598 | 8,010440757 | 15,66130413 | 0,000293683 | 0,00099022  |
| dual specificity phosphatase 19                                                             | 1,192591554 | 8,23740067  | 15,65609751 | 0,000294147 | 0,00099022  |
| ATPase, class V, type 10A                                                                   | 1,297720286 | 6,092817967 | 15,64486092 | 0,000295151 | 0,00099022  |
| spindlin 1                                                                                  | 0,889286143 | 4,809077805 | 15,63802019 | 0,000295765 | 0,00099022  |
| MOB1, Mps One Binder kinase activator-like 2A (yeast)                                       | 1,184244429 | 7,970563449 | 15,63510172 | 0,000296027 | 0,00099022  |
| TNF receptor-associated factor 1                                                            | 1,148900228 | 11,37733528 | 15,63181484 | 0,000296322 | 0,00099022  |
| coiled-coil domain containing 59                                                            | 1,198901965 | 6,9229546   | 15,61682262 | 0,000297675 | 0,000992823 |
| RIKEN cDNA 0610010012 gene                                                                  | 1,551034263 | 5,921325812 | 15,60513672 | 0,000298734 | 0,000994439 |
| serine/arginine-rich splicing factor 11                                                     | 1,249621633 | 7,623099304 | 15,58298494 | 0,000300753 | 0,00099798  |
| hypothetical LOC100505088                                                                   | 0,928335371 | 5,255342391 | 15,57759311 | 0,000301247 | 0,00099798  |
| tousled-like kinase 2 ( <i>Arabidopsis</i> )                                                | 0,986004012 | 7,651051544 | 15,57335081 | 0,000301636 | 0,00099798  |
| regulator of G-protein signaling 1                                                          | 1,056604653 | 11,57564867 | 15,56673616 | 0,000302245 | 0,00099798  |
| nuclear factor, interleukin 3, regulated                                                    | 1,107350253 | 12,2385876  | 15,56200555 | 0,00030268  | 0,00099798  |
| ER degradation enhancer, mannosidase alpha-like 2                                           | 1,11907674  | 5,748109159 | 15,50926499 | 0,000307588 | 0,01012232  |
| predicted pseudogene 16379                                                                  | 1,406822296 | 9,486644097 | 15,48818641 | 0,000309574 | 0,01016837  |
| Morf4 family associated protein 1                                                           | 1,359352383 | 8,023874219 | 15,45604804 | 0,000312632 | 0,01023066  |
| kinectin 1                                                                                  | 1,402525695 | 5,662548519 | 15,45543097 | 0,000312691 | 0,01023066  |
| torsin A interacting protein 2                                                              | 1,352136135 | 6,450316945 | 15,44966051 | 0,000313244 | 0,01023066  |
| emerin                                                                                      | 1,269162583 | 10,03839612 | 15,42821503 | 0,000315308 | 0,01027868  |
| zinc ribbon domain containing, 1                                                            | 1,243654725 | 6,780038219 | 15,41143191 | 0,000316934 | 0,01029399  |
| destrin                                                                                     | 1,070907758 | 12,27786736 | 15,41049701 | 0,000317025 | 0,01029399  |
| RIKEN cDNA E130012A19 gene                                                                  | 1,171785897 | 8,039669071 | 15,40498446 | 0,000317561 | 0,01029399  |
| sema domain, immunoglobulin domain (Ig), TM domain, and short cytoplasmic domain            | 0,99841946  | 4,85425031  | 15,38305919 | 0,000319705 | 0,01034411  |
| lectin, galactose binding, soluble 9                                                        | 1,103818765 | 7,189494523 | 15,3411872  | 0,000323846 | 0,01044378  |
| emerin                                                                                      | 1,253772508 | 9,117643245 | 15,33580018 | 0,000324383 | 0,01044378  |
| Ngfi-A binding protein 1                                                                    | 1,283183392 | 5,712192785 | 15,33367084 | 0,000324596 | 0,01044378  |
| histocompatibility 2, O region alpha locus                                                  | 0,849286864 | 7,753903707 | 15,25811358 | 0,000332244 | 0,01067004  |
| histone deacetylase 1                                                                       | 1,00742789  | 8,469226405 | 15,20337248 | 0,000337915 | 0,01083205  |
| histocompatibility 2, D region locus 1                                                      | 1,50555557  | 9,313418007 | 15,18987508 | 0,00033933  | 0,01085731  |
| gephyrin                                                                                    | 1,193878605 | 6,703308289 | 15,17375733 | 0,000341029 | 0,01089154  |
| Rous sarcoma oncogene                                                                       | 1,348986664 | 6,544296788 | 15,15613614 | 0,000342898 | 0,01093104  |
| holocytochrome c synthetase                                                                 | 1,403369954 | 5,989810386 | 15,14491954 | 0,000344093 | 0,01094899  |
| colony stimulating factor 2 receptor, beta 2, low-affinity (granulocyte-macrophage)         | 0,853773882 | 10,5636847  | 15,03752557 | 0,000355785 | 0,01130024  |
| latexin                                                                                     | 1,272023386 | 10,08783936 | 15,02328256 | 0,000357369 | 0,01132978  |
| family with sequence similarity 126, member A                                               | 1,142511025 | 8,169785767 | 14,996337   | 0,000360389 | 0,01140463  |
| RIKEN cDNA 7530420F21 gene                                                                  | 1,435268439 | 5,11175277  | 14,95982739 | 0,000364527 | 0,01151454  |
| granzyme M (lymphocyte met-ase 1)                                                           | 0,813271012 | 5,437562933 | 14,91218869 | 0,00037001  | 0,01166643  |
| death-associated protein kinase 2                                                           | 1,488708293 | 5,475546551 | 14,84330799 | 0,000378105 | 0,01189998  |
| zinc finger, DHHC domain containing 24                                                      | 1,39598461  | 5,156081127 | 14,83451429 | 0,000379153 | 0,01191131  |
| ribosomal protein S27-like                                                                  | 1,308775123 | 14,39565161 | 14,81897685 | 0,000381012 | 0,01192752  |
| Cbp/p300-interacting transactivator, with Glu/Asp-rich carboxy-terminal domain, 2           | 1,02088782  | 5,441129631 | 14,8186912  | 0,000381047 | 0,01192752  |
| tetraspanin 2                                                                               | 1,307614474 | 5,474615722 | 14,81290745 | 0,000381742 | 0,0119277   |
| RIKEN cDNA 1810022K09 gene                                                                  | 1,331135391 | 11,10738051 | 14,75952803 | 0,000388225 | 0,01210844  |
| cathepsin C                                                                                 | 1,074319904 | 8,399339687 | 14,73374808 | 0,000391402 | 0,01218556  |
| programmed cell death 10                                                                    | 1,293308785 | 8,306516114 | 14,66142449 | 0,000400474 | 0,0124213   |
| SH3 domain binding glutamic acid-rich protein like 2                                        | 1,262154651 | 5,542161628 | 14,6575697  | 0,000400964 | 0,0124213   |
| testis derived transcript                                                                   | 1,188645769 | 12,98250658 | 14,65629157 | 0,000401127 | 0,0124213   |

|                                                                         |             |             |             |             |             |
|-------------------------------------------------------------------------|-------------|-------------|-------------|-------------|-------------|
| cancer susceptibility candidate 1                                       | 0,892631193 | 4,910200042 | 14,6294504  | 0,000404561 | 0,001250528 |
| ubiquitin-like 7 (bone marrow stromal cell-derived)                     | 0,926590321 | 9,589517237 | 14,61444886 | 0,000406496 | 0,001254267 |
| B-cell CLL/lymphoma 9-like                                              | 1,222473126 | 6,068592159 | 14,60294344 | 0,000407986 | 0,001256626 |
| tRNA phosphotransferase 1                                               | 1,160207452 | 4,701868916 | 14,5856074  | 0,000410244 | 0,001261336 |
| glucosaminyl (N-acetyl) transferase 2, I-branching enzyme               | 1,163987389 | 9,07136929  | 14,5749635  | 0,000411637 | 0,001261583 |
| ER degradation enhancer, mannosidase alpha-like 2                       | 1,376855175 | 8,191363446 | 14,57386245 | 0,000411782 | 0,001261583 |
| ADP-ribosylation factor-like 5C                                         | 1,484433122 | 7,72058258  | 14,56205227 | 0,000413335 | 0,001263093 |
| SH3-binding domain glutamic acid-rich protein like whirlin              | 1,465243177 | 9,344537131 | 14,5590243  | 0,000413734 | 0,001263093 |
| NCK-associated protein 1                                                | 1,267497467 | 5,128404289 | 14,53113794 | 0,000417432 | 0,001272138 |
| RIKEN cDNA 4930503L19 gene                                              | 1,277813815 | 6,95563517  | 14,52295693 | 0,000418524 | 0,001273225 |
| splicing factor 3a, subunit 3                                           | 1,345337213 | 5,388492363 | 14,48254009 | 0,000423967 | 0,001287521 |
| serine protease inhibitor, Kunitz type 1                                | 1,228313263 | 10,62052306 | 14,44556857 | 0,000429017 | 0,001300245 |
| interferon-induced protein with tetratricopeptide repeats 2             | 0,819972127 | 5,894455363 | 14,44090743 | 0,000429659 | 0,001300245 |
| B-cell leukemia/lymphoma 2 related protein A1c                          | 1,08424798  | 5,161895668 | 14,43424635 | 0,000430578 | 0,001300751 |
| ubiquitin-conjugating enzyme E2 variant 1                               | 1,286131765 | 10,5444273  | 14,41486002 | 0,000433265 | 0,001306588 |
| GATA binding protein 2                                                  | 1,223947372 | 7,199664392 | 14,40714108 | 0,00043434  | 0,001307552 |
| Ras suppressor protein 1                                                | 1,090571835 | 5,763942379 | 14,40015524 | 0,000435316 | 0,001308214 |
| nucleoporin 62                                                          | 1,37116601  | 7,407624946 | 14,39106474 | 0,000436589 | 0,001309767 |
| polymerase (DNA directed), mu                                           | 1,214123167 | 11,03650724 | 14,38504876 | 0,000437434 | 0,001310032 |
| ring finger protein 34                                                  | 1,089508498 | 4,952741787 | 14,36591125 | 0,000440135 | 0,001315075 |
| cadherin 1                                                              | 1,117079854 | 9,989637346 | 14,36236616 | 0,000440637 | 0,001315075 |
| tRNA phosphotransferase 1                                               | 1,196146007 | 5,151662897 | 14,32261093 | 0,000446317 | 0,001329732 |
| DEAD (Asp-Glu-Ala-Asp) box polypeptide 24                               | 1,22831348  | 6,586007173 | 14,30739667 | 0,000448513 | 0,001333978 |
| Jun-B oncogene                                                          | 0,954359546 | 7,424580964 | 14,2857867  | 0,000451652 | 0,001338517 |
| inhibitor of Bruton agammaglobulinemia tyrosine kinase                  | 1,222066903 | 10,1237662  | 14,27990243 | 0,000452512 | 0,001338517 |
| ADP-ribosylation factor-like 4C                                         | 1,288412446 | 7,680086321 | 14,27951111 | 0,000452569 | 0,001338517 |
| calcium homeostasis endoplasmic reticulum protein                       | 0,822822693 | 9,499774504 | 14,27566598 | 0,000453132 | 0,001338517 |
| breast carcinoma amplified sequence 1                                   | 0,97219555  | 8,402509788 | 14,21437324 | 0,00046221  | 0,001363007 |
| nuclear factor of activated T-cells 5                                   | 1,393931635 | 6,933924618 | 14,18317476 | 0,000466911 | 0,001374527 |
| phosphatidylinositol-4-phosphate 5-kinase, type 1 alpha                 | 1,196114452 | 9,64302165  | 14,15125414 | 0,000471777 | 0,001386496 |
| translocase of inner mitochondrial membrane 8 homolog b (yeast)         | 1,046849189 | 9,016447875 | 14,14286241 | 0,000473066 | 0,001387927 |
| zinc finger CCHC type, antiviral 1                                      | 1,222973781 | 11,02457122 | 14,13525192 | 0,000474238 | 0,001389013 |
| lactate dehydrogenase A                                                 | 1,185219807 | 5,425469664 | 14,11805531 | 0,0004769   | 0,001394449 |
| predicted gene 5918                                                     | 0,929713883 | 12,09020795 | 14,10813521 | 0,000478443 | 0,001396603 |
| deleted in liver cancer 1                                               | 1,074153018 | 6,490078938 | 14,09210135 | 0,00048095  | 0,001398519 |
| purinergic receptor P2Y, G-protein coupled, 14                          | 1,023442462 | 4,68599572  | 14,08749331 | 0,000481673 | 0,001398519 |
| membrane-associated ring finger (C3HC4) 5                               | 1,379128362 | 5,201659361 | 14,08047006 | 0,000482777 | 0,001398519 |
| nuclear antigen Sp100                                                   | 1,214706935 | 7,304784377 | 14,07913255 | 0,000482988 | 0,001398519 |
| protein phosphatase 2 (formerly 2A), catalytic subunit, alpha isoform   | 1,146292201 | 4,901961904 | 14,07817048 | 0,00048314  | 0,001398519 |
| myotubularin related protein 14                                         | 1,202863048 | 12,57479535 | 14,06218116 | 0,000485667 | 0,001403196 |
| Dnaj (Hsp40) homolog, subfamily C, member 24                            | 1,195971051 | 11,14877895 | 14,05520835 | 0,000486774 | 0,001403196 |
| calcium/calmodulin-dependent protein kinase II, delta                   | 1,303788467 | 7,958799368 | 14,04367844 | 0,000488611 | 0,001403196 |
| complement component (3b/4b) receptor 1-like                            | 0,85815967  | 5,889602612 | 14,04090502 | 0,000489054 | 0,001403196 |
| caspase 6                                                               | 1,390348168 | 8,225777397 | 14,04008593 | 0,000489185 | 0,001403196 |
| chemokine (C-C motif) ligand 5                                          | 0,958219048 | 7,097921427 | 14,037373   | 0,000489619 | 0,001403196 |
| cadherin-like 26                                                        | 1,314760238 | 14,04736377 | 14,01699408 | 0,000492893 | 0,001408553 |
| polymerase I and transcript release factor                              | 1,503583324 | 5,622557191 | 14,0156103  | 0,000493116 | 0,001408553 |
| regulator of G-protein signaling 1                                      | 1,176171728 | 5,091003801 | 14,00529309 | 0,000494784 | 0,001410989 |
| lysosomal-associated protein transmembrane 4B                           | 1,180141682 | 11,5348927  | 13,97633369 | 0,0004995   | 0,001422095 |
| killer cell lectin-like receptor subfamily K, member 1                  | 1,552949492 | 5,338789979 | 13,97079304 | 0,000500408 | 0,001422342 |
| protein phosphatase 1, regulatory (inhibitor) subunit 3G                | 1,34500479  | 5,3798343   | 13,9616869  | 0,000501905 | 0,001424257 |
| glyceraldehyde-3-phosphate dehydrogenase                                | 1,09137759  | 4,684736853 | 13,94844426 | 0,00050409  | 0,001428118 |
| signal transducer and activator of transcription 5A                     | 1,107939239 | 12,87988441 | 13,9410958  | 0,000505308 | 0,001429229 |
| phytanoyl-CoA dioxygenase domain containing 1                           | 0,96267963  | 5,914493627 | 13,90336117 | 0,000511614 | 0,001444704 |
| ADP-ribosylation factor-like 5A                                         | 1,162120786 | 5,072323281 | 13,8732088  | 0,000516718 | 0,001454597 |
| CCAAT/enhancer binding protein (C/EBP), gamma                           | 1,253323496 | 9,572335905 | 13,87273656 | 0,000516798 | 0,001454597 |
| myelin basic protein expression factor 2, repressor                     | 1,029253054 | 9,98941523  | 13,85354279 | 0,000520078 | 0,001461452 |
| leucine rich repeat (in FLII) interacting protein 1                     | 1,15719811  | 5,608373788 | 13,8241982  | 0,000525138 | 0,001473281 |
| bromodomain PHD finger transcription factor                             | 1,021734957 | 7,000887192 | 13,8028211  | 0,00052886  | 0,001481323 |
| immunity-related GTPase family, Q                                       | 1,434836515 | 5,598752047 | 13,77105895 | 0,000534447 | 0,001494552 |
| plakophilin 3                                                           | 0,966047596 | 7,034397793 | 13,72914926 | 0,000541922 | 0,001513011 |
| cyclin-dependent kinase 10                                              | 1,199912084 | 6,684816001 | 13,70726647 | 0,000545872 | 0,001521586 |
| Rho GTPase activating protein 26                                        | 1,340011339 | 5,726912636 | 13,67315593 | 0,000552097 | 0,001535823 |
| HECT domain containing 2                                                | 1,374349195 | 7,586415857 | 13,66957624 | 0,000552754 | 0,001535823 |
| myosin, light chain 12B, regulatory                                     | 1,161844778 | 6,787176397 | 13,650251   | 0,000556322 | 0,001543258 |
| thymopoietin                                                            | 1,032946106 | 9,630870926 | 13,59768643 | 0,000566159 | 0,001568034 |
| matrix metalloproteinase 3                                              | 0,908031414 | 6,502391437 | 13,52163554 | 0,000580747 | 0,001605867 |
| PDGFA associated protein 1                                              | 0,725856207 | 5,172307855 | 13,45718652 | 0,000593447 | 0,001638369 |
| non-POU-domain-containing, octamer binding protein                      | 1,330515159 | 9,153541679 | 13,41840833 | 0,000601243 | 0,001657247 |
| SAM domain, SH3 domain and nuclear localization signals, 1              | 1,651244971 | 5,245102855 | 13,4070412  | 0,00060355  | 0,001660961 |
| EVIS-like protein-like                                                  | 1,223631277 | 13,9239485  | 13,37395527 | 0,000610323 | 0,001676936 |
| zinc finger and BTB domain containing 26                                | 1,093809696 | 5,601629577 | 13,36141173 | 0,000612914 | 0,001681385 |
| protein phosphatase 1M                                                  | 1,319929531 | 4,889894951 | 13,34827813 | 0,00061564  | 0,001685016 |
| ER degradation enhancer, mannosidase alpha-like 2                       | 1,278568992 | 12,12170256 | 13,34449034 | 0,000616429 | 0,001685016 |
| UDP-glucose ceramide glucosyltransferase                                | 1,145515749 | 6,167304215 | 13,33752864 | 0,000617882 | 0,001685016 |
| RAB34, member of RAS oncogene family                                    | 0,864649094 | 9,418357971 | 13,33402383 | 0,000618615 | 0,001685016 |
| ubiquitin protein ligase E3A                                            | 0,910825425 | 6,875956274 | 13,33168342 | 0,000619105 | 0,001685016 |
| fragile X mental retardation, autosomal homolog 2                       | 1,421416602 | 5,113767198 | 13,29582835 | 0,000626667 | 0,00170292  |
| ubiquitin domain containing 2                                           | 1,041169324 | 7,60898579  | 13,20578462 | 0,000646129 | 0,001753055 |
| mediator of RNA polymerase II transcription, subunit 19 homolog (yeast) | 1,319146746 | 6,626783039 | 13,15389254 | 0,00065766  | 0,001781547 |
|                                                                         | 1,278294063 | 5,645042581 | 13,13412159 | 0,000662115 | 0,001790813 |

|                                                                          |             |             |             |             |             |
|--------------------------------------------------------------------------|-------------|-------------|-------------|-------------|-------------|
| activating transcription factor 5                                        | 1,247318061 | 9,940227966 | 12,97570653 | 0,000699088 | 0,001887865 |
| trans-golgi network protein                                              | 1,126294397 | 7,974279086 | 12,96162868 | 0,000702487 | 0,001894089 |
| carbohydrate sulfotransferase 11                                         | 1,107569507 | 6,523302683 | 12,91878392 | 0,000712948 | 0,00191679  |
| ubiquitin specific peptidase 40                                          | 1,193160406 | 4,914394856 | 12,91751673 | 0,00071326  | 0,00191679  |
| sulfite oxidase                                                          | 1,316069167 | 7,276416211 | 12,9135885  | 0,000714228 | 0,00191679  |
| B-cell linker                                                            | 1,100894044 | 7,936800695 | 12,90883146 | 0,000715403 | 0,001916971 |
| coiled-coil-helix-coiled-coil-helix domain containing 7                  | 1,21911827  | 8,28457363  | 12,89721298 | 0,000718282 | 0,00192171  |
| ras homolog gene family, member C                                        | 0,908596322 | 5,753346066 | 12,8771006  | 0,000723297 | 0,001932141 |
| tropomyosin 4                                                            | 1,194799542 | 8,758514016 | 12,84655524 | 0,00073099  | 0,001949683 |
| ubiquitin domain containing 2                                            | 1,374387015 | 5,106517856 | 12,8313087  | 0,000734865 | 0,001957003 |
| killer cell lectin-like receptor subfamily G, member 2                   | 1,433188135 | 5,132519266 | 12,80611803 | 0,00074132  | 0,001971159 |
| TWIST neighbor                                                           | 1,551095408 | 6,580112571 | 12,79442831 | 0,000744337 | 0,001976146 |
| cleavage and polyadenylation specific factor 2                           | 0,897490111 | 5,046104973 | 12,76877502 | 0,000751007 | 0,001989842 |
| protein inhibitor of activated STAT 4                                    | 0,958539179 | 6,513921611 | 12,76576439 | 0,000751795 | 0,001989842 |
| AE binding protein 2                                                     | 1,232537965 | 7,980480049 | 12,74179503 | 0,000758097 | 0,00200346  |
| WD repeat domain containing 82                                           | 0,853529759 | 5,127469131 | 12,72249951 | 0,000763215 | 0,002010958 |
| v-maf musculoaponeurotic fibrosarcoma oncogene family, protein F (avian) | 1,065884272 | 4,892841365 | 12,72233703 | 0,000763258 | 0,002010958 |
| RIKEN cDNA 4930420K17 gene                                               | 1,071412562 | 5,217591361 | 12,70751888 | 0,000767215 | 0,002015385 |
| glycoprotein galactosyltransferase alpha 1, 3                            | 1,113554603 | 9,137565521 | 12,70353244 | 0,000768284 | 0,002015385 |
| Tax1 (human T-cell leukemia virus type I) binding protein 1              | 1,023894827 | 11,1985803  | 12,70298398 | 0,000768431 | 0,002015385 |
| family with sequence similarity 177, member A                            | 1,372240244 | 11,43241371 | 12,68117084 | 0,00077431  | 0,002027731 |
| pellino 1                                                                | 1,071412562 | 7,377855898 | 12,66862179 | 0,000777715 | 0,002033573 |
| myc induced nuclear antigen                                              | 1,214528555 | 5,927423337 | 12,64421888 | 0,000784387 | 0,002047924 |
| G protein-coupled receptor kinase-interactor 2                           | 0,961879914 | 5,503606031 | 12,6299465  | 0,000788319 | 0,002055091 |
| actin related protein 2/3 complex, subunit 5                             | 1,059390599 | 10,00716316 | 12,62492023 | 0,000789709 | 0,002055619 |
| macrophage migration inhibitory factor                                   | 1,284371386 | 10,59824759 | 12,61385748 | 0,000792779 | 0,002060511 |
| family with sequence similarity 3, member C                              | 1,080728053 | 9,428415293 | 12,60448004 | 0,000795392 | 0,002064203 |
| WD repeat domain 92                                                      | 1,258134199 | 7,454801093 | 12,58616398 | 0,000800524 | 0,002074411 |
| zinc finger protein 451                                                  | 1,00319109  | 6,925452301 | 12,56153734 | 0,000807484 | 0,002084703 |
| tumor suppressing subtransferable candidate 1                            | 1,164901542 | 7,496675269 | 12,56061092 | 0,000807747 | 0,002084703 |
| family with sequence similarity 134, member B                            | 1,36630101  | 8,326427697 | 12,5593396  | 0,000808108 | 0,002084703 |
| S100 calcium binding protein A3                                          | 1,144592493 | 5,408150071 | 12,53290598 | 0,000815663 | 0,002101061 |
| methionine adenosyltransferase II, beta                                  | 0,995969423 | 8,79013682  | 12,47944686 | 0,000831191 | 0,00213435  |
| eukaryotic translation initiation factor 2B, subunit 1 (alpha)           | 1,353174455 | 7,098595535 | 12,47778734 | 0,000831678 | 0,00213435  |
| tousled-like kinase 2 (Arabidopsis)                                      | 0,854805869 | 8,70112733  | 12,47572056 | 0,000832285 | 0,00213435  |
| TBC1 domain family, member 9                                             | 0,984103591 | 7,732856707 | 12,46630537 | 0,000835059 | 0,002136514 |
| syndecan 4                                                               | 1,401223547 | 8,22867438  | 12,46448123 | 0,000835598 | 0,002136514 |
| cyclin-dependent kinase inhibitor 1A (P21)                               | 1,058224829 | 11,73053413 | 12,44153538 | 0,000842408 | 0,002148069 |
| intercellular adhesion molecule 1                                        | 1,19871319  | 11,2413341  | 12,44089388 | 0,000842599 | 0,002148069 |
| tripartite motif-containing 21                                           | 1,130349101 | 4,787907512 | 12,4275901  | 0,000846577 | 0,002155037 |
| PRP38 pre-mRNA processing factor 38 (yeast) domain containing A          | 1,264313301 | 8,921861563 | 12,41352616 | 0,000850806 | 0,002161059 |
| coiled-coil domain containing 59                                         | 1,002856553 | 7,672443396 | 12,40862674 | 0,000852285 | 0,002161059 |
| family with sequence similarity 40, member A                             | 1,137536322 | 9,713432409 | 12,40729437 | 0,000852688 | 0,002161059 |
| WNK lysine deficient protein kinase 1                                    | 1,239991346 | 5,583513391 | 12,39512918 | 0,000856375 | 0,002167223 |
| protein tyrosine phosphatase, non-receptor type 6                        | 1,449113225 | 7,743745365 | 12,38971786 | 0,000858021 | 0,002168226 |
| hypothetical LOC100504309                                                | 1,419973318 | 5,669185408 | 12,37010529 | 0,000864017 | 0,002180195 |
| solute carrier family 15, member 3                                       | 1,340294124 | 12,39671872 | 12,30441056 | 0,000884454 | 0,002228516 |
| signal transducer and activator of transcription 4                       | 1,243698356 | 11,73789983 | 12,29300024 | 0,00088806  | 0,002234349 |
| family with sequence similarity 49, member B                             | 1,434596317 | 6,238330413 | 12,26893407 | 0,000895721 | 0,002250353 |
| predicted gene 8909                                                      | 1,076890103 | 9,856221783 | 12,2601545  | 0,000898535 | 0,00225415  |
| complement component (3b/4b) receptor 1-like                             | 1,16281652  | 7,264917068 | 12,24590154 | 0,000903124 | 0,00226071  |
| SYF2 homolog, RNA splicing factor (S. cerevisiae)                        | 1,023179439 | 10,27921484 | 12,24392775 | 0,000903762 | 0,00226071  |
| peptidase (mitochondrial processing) beta                                | 1,510781044 | 6,956264542 | 12,23234118 | 0,000907515 | 0,002266824 |
| microfibrillar-associated protein 3-like                                 | 1,086611193 | 4,850735615 | 12,18905752 | 0,000921696 | 0,002298928 |
| killer cell lectin-like receptor subfamily K, member 1                   | 1,482588398 | 5,331455554 | 12,17585116 | 0,000926074 | 0,002306523 |
| mediator complex subunit 7                                               | 1,184102727 | 8,437193885 | 12,1444486  | 0,000936578 | 0,002329334 |
| RIKEN cDNA 2310004I24 gene                                               | 1,145427134 | 7,240051221 | 12,08200884 | 0,000957874 | 0,00237888  |
| centrosomal protein 120                                                  | 1,217086996 | 6,726317037 | 12,04834455 | 0,000969585 | 0,002404516 |
| succinate dehydrogenase complex, subunit D, integral membrane protein    | 1,578193373 | 7,107325485 | 12,03874616 | 0,000972954 | 0,00240926  |
| ArfGAP with coiled-coil, ankyrin repeat and PH domains 1                 | 0,892863674 | 6,256928497 | 12,03497442 | 0,000974282 | 0,00240926  |
| myeloid/lymphoid or mixed-lineage leukemia 5                             | 1,222045564 | 8,098740135 | 12,02272812 | 0,000978607 | 0,002416503 |
| leukocyte receptor cluster (LRC) member 1                                | 1,129276526 | 5,866370937 | 12,01242636 | 0,000982262 | 0,002422074 |
| integrator complex subunit 4                                             | 1,165453311 | 9,223477565 | 11,97383859 | 0,000996094 | 0,002452686 |
| metastasis suppressor 1                                                  | 1,343863276 | 7,251957659 | 11,96612085 | 0,000998887 | 0,00245607  |
| family with sequence similarity 89, member A                             | 1,212990544 | 7,546787336 | 11,94908353 | 0,001005085 | 0,002467804 |
| chromodomain helicase DNA binding protein 9                              | 1,016983087 | 7,320837452 | 11,88391664 | 0,001029201 | 0,002523439 |
| tripartite motif-containing 35                                           | 1,4795369   | 5,862878281 | 11,87420024 | 0,001032854 | 0,002528812 |
| membrane-associated ring finger (C3HC4) 7                                | 1,017757177 | 7,004862921 | 11,86057183 | 0,001038002 | 0,00253444  |
| karyopherin (importin) alpha 3                                           | 1,632962917 | 7,33497944  | 11,86036267 | 0,001038081 | 0,00253444  |
| glucosamine-6-phosphate deaminase 1                                      | 1,178752412 | 7,95958254  | 11,85342295 | 0,001040714 | 0,00253729  |
| CCR4-NOT transcription complex, subunit 6                                | 1,246348088 | 6,46116029  | 11,83853354 | 0,001046389 | 0,002546071 |
| hypothetical LOC100503029                                                | 1,142223621 | 5,602423545 | 11,83391855 | 0,001048155 | 0,002546071 |
| nitric oxide synthase interacting protein                                | 0,916274781 | 6,6368045   | 11,83242206 | 0,001048728 | 0,002546071 |
| RAP1, GTP-GDP dissociation stimulator 1                                  | 0,936990041 | 10,02919343 | 11,78700637 | 0,001066303 | 0,002585114 |
| centromere protein Q                                                     | 1,097905455 | 5,004911436 | 11,77064183 | 0,001072719 | 0,002597029 |
| ribosomal protein S6 kinase, polypeptide 2                               | 0,913969262 | 6,373469007 | 11,75116929 | 0,00108041  | 0,002610205 |
| basic leucine zipper transcription factor, ATF-like 3                    | 0,886150099 | 9,401728158 | 11,74923756 | 0,001081177 | 0,002610205 |
| solute carrier family 38, member 1                                       | 1,036601038 | 4,710550748 | 11,7265657  | 0,001090219 | 0,002628369 |
| FIP1 like 1 (S. cerevisiae)                                              | 0,981071085 | 6,394994991 | 11,71271418 | 0,001095786 | 0,002637206 |
| protein phosphatase 1K (PP2C domain containing)                          | 1,038608424 | 5,774850998 | 11,70987426 | 0,001096932 | 0,002637206 |
| polymerase (DNA directed), mu                                            | 0,950142539 | 5,373416917 | 11,69436628 | 0,001103211 | 0,002646323 |

|                                                                                       |             |             |             |             |             |
|---------------------------------------------------------------------------------------|-------------|-------------|-------------|-------------|-------------|
| chemokine (C-C motif) ligand 2                                                        | 0,860779413 | 5,074521642 | 11,69296241 | 0,001103781 | 0,002646323 |
| sorting nexin 11                                                                      | 1,300198222 | 10,43845272 | 11,68350942 | 0,001107631 | 0,002651881 |
| small nuclear RNA activating complex, polypeptide 1                                   | 1,167764902 | 5,090149942 | 11,67285411 | 0,001111989 | 0,002658638 |
| phosphofructokinase, platelet                                                         | 0,935069493 | 9,096700139 | 11,66813926 | 0,001113924 | 0,002659559 |
| forkhead box O1                                                                       | 1,145584212 | 6,607099206 | 11,66054306 | 0,001117049 | 0,002660468 |
| coiled-coil domain containing 97                                                      | 1,181941814 | 5,434290382 | 11,65977521 | 0,001117366 | 0,002660468 |
| serine protease inhibitor, Kunitz type 1                                              | 1,099786428 | 11,82422836 | 11,6534117  | 0,001119992 | 0,002661949 |
| zinc finger, SWIM domain containing 4                                                 | 1,027182009 | 7,440303109 | 11,64838803 | 0,001122071 | 0,002661949 |
| TNFAIP3 interacting protein 1                                                         | 1,09640915  | 5,419214815 | 11,6471078  | 0,001122601 | 0,002661949 |
| protein phosphatase 1, regulatory (inhibitor) subunit 15b                             | 1,324452286 | 6,469033903 | 11,60152212 | 0,001141677 | 0,002703478 |
| proteasome (prosome, macropain) subunit, alpha type 2                                 | 1,509479584 | 5,806872978 | 11,58937681 | 0,001146822 | 0,002705747 |
| inverted formin, FH2 and WH2 domain containing                                        | 0,967612048 | 7,446898344 | 11,58921951 | 0,001146888 | 0,002705747 |
| methionine-tRNA synthetase                                                            | 0,914524677 | 8,11870344  | 11,58704501 | 0,001147812 | 0,002705747 |
| peptidylprolyl isomerase (cyclophilin)-like 3                                         | 1,235176996 | 9,345397843 | 11,58392343 | 0,00114914  | 0,002705747 |
| PRP40 pre-mRNA processing factor 40 homolog A (yeast)                                 | 1,478452694 | 5,566175467 | 11,58011403 | 0,001150763 | 0,002705747 |
| RIKEN cDNA O610007L01 gene                                                            | 1,116647891 | 9,117445481 | 11,57718319 | 0,001152014 | 0,002705747 |
| RIKEN cDNA O610009B22 gene                                                            | 1,301249674 | 7,946752433 | 11,56626236 | 0,001156686 | 0,002713041 |
| zinc finger with KRAB and SCAN domains 3                                              | 1,265301075 | 6,176403449 | 11,55575403 | 0,001161203 | 0,00271995  |
| transmembrane and tetratricopeptide repeat containing 2                               | 1,175431912 | 8,191668507 | 11,54480521 | 0,001165931 | 0,002725588 |
| predicted gene 13363                                                                  | 1,077010786 | 5,782021029 | 11,54289228 | 0,00116676  | 0,002725588 |
| RIKEN cDNA 9830001H06 gene                                                            | 1,076225397 | 5,915011993 | 11,53546552 | 0,001169982 | 0,002729432 |
| TBC1 domain family, member 1                                                          | 1,037262423 | 8,389475416 | 11,52641364 | 0,001173923 | 0,00273494  |
| zinc finger protein 191                                                               | 1,080430201 | 5,051829267 | 11,5094733  | 0,001181339 | 0,002748519 |
| interleukin 23, alpha subunit p19                                                     | 0,981137444 | 4,517548232 | 11,45199044 | 0,001206909 | 0,00280424  |
| excision repair cross-complementing rodent repair deficiency, complementation group 5 | 0,922387196 | 7,450002965 | 11,44478553 | 0,001210158 | 0,0028063   |
| signal recognition particle 72                                                        | 1,109389295 | 6,468223856 | 11,44044156 | 0,001212122 | 0,0028063   |
| protein kinase inhibitor beta, cAMP dependent, testis specific                        | 1,32878793  | 6,765270808 | 11,43859104 | 0,00121296  | 0,0028063   |
| transcriptional adaptor 3                                                             | 1,0655521   | 6,223948297 | 11,43567803 | 0,00121428  | 0,0028063   |
| protein arginine N-methyltransferase 5                                                | 1,236806969 | 6,831205446 | 11,41308655 | 0,001224574 | 0,002823523 |
| ring finger protein 114                                                               | 1,315867428 | 8,622012963 | 11,41205393 | 0,001225047 | 0,002823523 |
| splicing factor 3a, subunit 1                                                         | 1,122609212 | 8,75535743  | 11,40512765 | 0,001228224 | 0,002823523 |
| proteasome (prosome, macropain) 26S subunit, ATPase, 4                                | 1,280933285 | 6,365003921 | 11,40505709 | 0,001228257 | 0,002823523 |
| AE binding protein 2                                                                  | 1,00956582  | 8,252582308 | 11,39766551 | 0,001231658 | 0,002827587 |
| glyoxylate reductase/hydroxypyruvate reductase                                        | 1,3772156   | 6,709115881 | 11,39170981 | 0,001234407 | 0,002830042 |
| polymerase (RNA) I polypeptide C                                                      | 1,377518361 | 8,819421509 | 11,38826957 | 0,001235998 | 0,002830042 |
| TNF receptor-associated factor 3                                                      | 1,066526357 | 4,869887649 | 11,36997981 | 0,001244495 | 0,002845734 |
| SAC1 (suppressor of actin mutations 1, homolog)-like (S. cerevisiae)                  | 1,304478548 | 10,05253938 | 11,36011691 | 0,001249105 | 0,002852508 |
| cytochrome b5 reductase 3                                                             | 1,049627651 | 10,54155317 | 11,3448614  | 0,001256274 | 0,002864966 |
| methionine-tRNA synthetase                                                            | 1,301252773 | 5,852704263 | 11,34147791 | 0,001257871 | 0,002864966 |
| PDZ domain containing 11                                                              | 1,387615141 | 7,351494506 | 11,27425748 | 0,001290075 | 0,002934455 |
| HSPA (heat shock 70kDa) binding protein, cytoplasmic cochaperone 1                    | 0,812989598 | 7,144569003 | 11,26368906 | 0,001295224 | 0,002938809 |
| nucleoporin 50                                                                        | 1,191710254 | 5,218369735 | 11,26335881 | 0,001295385 | 0,002938809 |
| cysteine and glycine-rich protein 2                                                   | 1,071035811 | 10,49752028 | 11,2428487  | 0,001305446 | 0,002957758 |
| Harvey rat sarcoma oncogene, subgroup R                                               | 1,145750027 | 9,635996636 | 11,23772894 | 0,001307971 | 0,002959605 |
| KDM1 lysine (K)-specific demethylase 2B                                               | 1,225192602 | 5,511154008 | 11,22318627 | 0,001315175 | 0,002972021 |
| integrator complex subunit 8                                                          | 1,241245463 | 5,364400713 | 11,18474662 | 0,001334437 | 0,003011617 |
| golgi autoantigen, golgin subfamily a, 3                                              | 1,073664705 | 7,243744922 | 11,16723053 | 0,001343321 | 0,00302772  |
| high mobility group box 1                                                             | 1,588259373 | 5,887852096 | 11,16047506 | 0,001346766 | 0,003031536 |
| A kinase (PRKA) anchor protein 13                                                     | 1,130720687 | 5,357442503 | 11,14307283 | 0,001355686 | 0,003045745 |
| myotubularin related protein 14                                                       | 1,245374845 | 7,740551272 | 11,14130172 | 0,001356597 | 0,003045745 |
| erythrocyte protein band 4.1-like 3                                                   | 1,188421249 | 7,995180513 | 11,1270455  | 0,001363961 | 0,003058311 |
| pleiomorphic adenoma gene-like 2                                                      | 1,00233791  | 9,434250383 | 11,1180246  | 0,001368644 | 0,003063143 |
| protein phosphatase 1B, magnesium dependent, beta isoform                             | 1,199794665 | 8,227907585 | 11,11608119 | 0,001369655 | 0,003063143 |
| RIKEN cDNA 4930583H14 gene                                                            | 1,512653169 | 5,498589709 | 11,11101166 | 0,001372297 | 0,003065092 |
| ubiquitin-conjugating enzyme E2Z (putative)                                           | 1,100938261 | 6,692346759 | 11,10065889 | 0,001377711 | 0,003073219 |
| kinesin light chain 1                                                                 | 0,969524269 | 6,654473628 | 11,09354062 | 0,001381448 | 0,003077588 |
| spermine oxidase                                                                      | 1,072711951 | 6,452152234 | 11,08868165 | 0,001384005 | 0,003079322 |
| RIB43A domain with coiled-coils 1                                                     | 1,210176486 | 4,858278155 | 11,0826761  | 0,001387173 | 0,003081732 |
| interleukin 15                                                                        | 0,961288625 | 8,116930548 | 11,07205327 | 0,001392798 | 0,003081732 |
| glucosidase, alpha; neutral C                                                         | 1,143975049 | 7,951289287 | 11,07076603 | 0,001393481 | 0,003081732 |
| signal recognition particle receptor ('docking protein')                              | 1,304588818 | 8,676983176 | 11,06987422 | 0,001393955 | 0,003081732 |
| methyl-CpG binding domain protein 5                                                   | 1,139839268 | 5,033801647 | 11,06980786 | 0,001393999 | 0,003081732 |
| RIKEN cDNA C130026I21 gene                                                            | 1,23465782  | 5,040142471 | 11,06073989 | 0,001398816 | 0,003088458 |
| histocompatibility 2, Q region locus 5                                                | 0,914584264 | 12,8186149  | 11,01728731 | 0,001422213 | 0,003136115 |
| chromatin modifying protein 2A                                                        | 1,284174597 | 10,63619728 | 11,01169896 | 0,001425254 | 0,003138823 |
| ubiquitin-like 7 (bone marrow stromal cell-derived)                                   | 0,859868509 | 7,746849716 | 11,00324868 | 0,001429867 | 0,003144981 |
| zinc finger protein 292                                                               | 1,299829066 | 6,59420259  | 10,98538416 | 0,001439676 | 0,003162538 |
| zinc finger protein (C2H2 type) 276                                                   | 0,958511414 | 6,977507721 | 10,95943143 | 0,001454064 | 0,003190095 |
| methionine adenosyltransferase II, beta                                               | 1,032889331 | 7,042421836 | 10,92180853 | 0,001475216 | 0,003232403 |
| DEAD (Asp-Glu-Ala-Asp) box polypeptide 19a                                            | 1,414487328 | 5,329244421 | 10,9135051  | 0,001479931 | 0,003233018 |
| pleckstrin homology domain containing, family G (with RhoGef domain) member 3         | 0,851201948 | 4,831175786 | 10,91192948 | 0,001480828 | 0,003233018 |
| collagen, type XXVII, alpha 1                                                         | 1,178338172 | 5,088770439 | 10,91145292 | 0,001481099 | 0,003233018 |
| testis derived transcript                                                             | 1,253366682 | 13,02859238 | 10,88229277 | 0,001497812 | 0,003265381 |
| stromal interaction molecule 2                                                        | 1,464716725 | 5,989277486 | 10,87408431 | 0,001502556 | 0,003271602 |
| trans-acting transcription factor 6                                                   | 1,196309769 | 4,886563062 | 10,86794296 | 0,001506116 | 0,003275234 |
| interleukin 15                                                                        | 1,02999711  | 9,321103306 | 10,86162375 | 0,001509789 | 0,003279103 |
| neuroepithelial cell transforming gene 1                                              | 1,170892395 | 10,90422447 | 10,85518782 | 0,001513541 | 0,003283132 |
| RIKEN cDNA 1700034H14 gene                                                            | 0,972664059 | 5,00325042  | 10,84599523 | 0,001518919 | 0,003289252 |
| apoptotic peptidase activating factor 1                                               | 1,193088412 | 9,98191602  | 10,84324655 | 0,001520531 | 0,003289252 |
| intermediate filament family orphan 2                                                 | 0,879906455 | 5,750455458 | 10,8387052  | 0,001523199 | 0,003289252 |
| centromere protein L                                                                  | 1,247651917 | 9,004191779 | 10,83740554 | 0,001523963 | 0,003289252 |

|                                                                                                 |             |             |             |              |             |
|-------------------------------------------------------------------------------------------------|-------------|-------------|-------------|--------------|-------------|
| G patch domain containing 8                                                                     | 0,927086948 | 9,320550035 | 10,80255265 | 0,00154463   | 0,003329706 |
| fucosyltransferase 8                                                                            | 1,369630934 | 5,704336968 | 10,79896327 | 0,001546776  | 0,003330186 |
| protein phosphatase 1, regulatory (inhibitor) subunit 11                                        | 1,025669914 | 8,605840936 | 10,78978408 | 0,001552281  | 0,003337886 |
| GIPC PDZ domain containing family, member 1                                                     | 1,311213569 | 6,982259829 | 10,78375699 | 0,001555908  | 0,003341534 |
| kinesin family member 1B                                                                        | 1,373064601 | 5,744411646 | 10,77143502 | 0,001563353  | 0,003353363 |
| laminin, gamma 1                                                                                | 0,837170633 | 5,483783908 | 10,76712409 | 0,001565967  | 0,003354814 |
| protein-L-isoaspartate (D-aspartate) O-methyltransferase domain containing 2                    | 1,510619151 | 5,767013666 | 10,7612156  | 0,001569559  | 0,003358351 |
| brain and reproductive organ-expressed protein                                                  | 1,230924711 | 6,994887186 | 10,74433433 | 0,001579872  | 0,003376245 |
| interleukin 15                                                                                  | 0,864128452 | 10,52574211 | 10,73507922 | 0,001585559  | 0,00338422  |
| polymerase (DNA directed), alpha 2                                                              | 1,176180515 | 6,695797422 | 10,73149195 | 0,00158777   | 0,003384765 |
| phosphatidylinositol-4-phosphate 5-kinase, type 1 alpha                                         | 1,076693358 | 6,65584099  | 10,7225914  | 0,00159327   | 0,003392312 |
| arginine/serine-rich coiled-coil 2                                                              | 1,160901895 | 8,771618086 | 10,71024604 | 0,001600935  | 0,003404445 |
| acyl-Coenzyme A dehydrogenase, medium chain                                                     | 1,269340993 | 11,27455717 | 10,70131293 | 0,001606508  | 0,003412104 |
| RIKEN cDNA 1110012L19 gene                                                                      | 1,244279197 | 7,664948673 | 10,67588747 | 0,001622491  | 0,003441829 |
| nuclear factor, erythroid derived 2, like 3                                                     | 1,166763409 | 5,34990439  | 10,67173134 | 0,001625121  | 0,003443189 |
| ring finger protein 167                                                                         | 1,323470758 | 6,855715116 | 10,65997859 | 0,001632585  | 0,003454774 |
| RIKEN cDNA 5031414D18 gene                                                                      | 1,144515636 | 5,250479609 | 10,65530394 | 0,001635565  | 0,003456853 |
| engulfment and cell motility 1, ced-12 homolog (C. elegans)                                     | 1,141077058 | 5,592516141 | 10,64045025 | 0,001645074  | 0,003472711 |
| phosphatidylinositol-3,4,5-trisphosphate-dependent Rac exchange factor 1                        | 1,121665665 | 9,040319311 | 10,63700943 | 0,001647286  | 0,003473145 |
| RIKEN cDNA 4933424B01 gene                                                                      | 1,291405789 | 6,520996756 | 10,63098438 | 0,001651167  | 0,003477093 |
| Wolf-Hirschhorn syndrome candidate 1 (human)                                                    | 0,997244308 | 5,12891896  | 10,62355118 | 0,00165597   | 0,003482969 |
| methyltransferase like 11A                                                                      | 1,260225647 | 6,042886484 | 10,6156299  | 0,001661106  | 0,003489531 |
| catenin (cadherin associated protein), delta 1                                                  | 1,046457324 | 6,237043816 | 10,59306985 | 0,001675833  | 0,003510707 |
| SLU7 splicing factor homolog (S. cerevisiae)                                                    | 1,318821335 | 5,017163159 | 10,59035112 | 0,001677618  | 0,003510707 |
| nuclear factor, erythroid derived 2, like 2                                                     | 1,176529954 | 8,460902041 | 10,5857518  | 0,001680642  | 0,003510707 |
| tripartite motif-containing 23                                                                  | 1,045854399 | 6,239856529 | 10,58502671 | 0,00168112   | 0,003510707 |
| ectonucleoside triphosphate diphosphohydrolase 4                                                | 1,203542983 | 8,678762147 | 10,58471248 | 0,001681327  | 0,003510707 |
| UDP-Gal:betaGlcNAc beta 1,4-galactosyltransferase, polypeptide 3                                | 1,16738475  | 7,868807094 | 10,57936136 | 0,001684855  | 0,003513836 |
| EBNA1 binding protein 2                                                                         | 1,260199825 | 8,720331876 | 10,57498622 | 0,001687746  | 0,00351563  |
| zinc finger and BTB domain containing 43                                                        | 1,300269319 | 4,799366882 | 10,57186319 | 0,001689813  | 0,003515705 |
| rearranged L-myc fusion sequence                                                                | 1,265991911 | 8,126692706 | 10,54849303 | 0,001705375  | 0,003543823 |
| solute carrier family 22 (organic cation transporter), member 21                                | 0,960302164 | 5,220908278 | 10,5343127  | 0,001714898  | 0,003559338 |
| Rho GTPase activating protein 12                                                                | 1,278075424 | 4,771740341 | 10,52642101 | 0,001720224  | 0,003566117 |
| acyl-Coenzyme A binding domain containing 4                                                     | 0,93362227  | 6,462792482 | 10,5023271  | 0,001736602  | 0,003595763 |
| chromodomain helicase DNA binding protein 2                                                     | 1,03293948  | 9,436974284 | 10,48848732 | 0,001746091  | 0,003607381 |
| ArfGAP with RhoGAP domain, ankyrin repeat and PH domain 2                                       | 0,985068284 | 5,709131307 | 10,48774696 | 0,00174666   | 0,003607381 |
| proteasome (prosome, macropain) subunit, alpha type 3                                           | 1,425214714 | 6,986591452 | 10,48503784 | 0,001748465  | 0,003607381 |
| zinc finger homeobox 2                                                                          | 1,140510247 | 8,545261034 | 10,47081246 | 0,001758295  | 0,003622871 |
| macrophage migration inhibitory factor                                                          | 1,215992828 | 10,31010622 | 10,46812675 | 0,001760158  | 0,003622871 |
| nuclear factor of activated T-cells 5                                                           | 1,05635968  | 6,403972315 | 10,46105501 | 0,001765075  | 0,003628675 |
| leucine rich repeat containing 1                                                                | 1,132844056 | 5,759976403 | 10,44199699 | 0,001778403  | 0,003649621 |
| chromodomain helicase DNA binding protein 4                                                     | 1,343782533 | 5,797563307 | 10,44046377 | 0,00177948   | 0,003649621 |
| calponin 3, acidic                                                                              | 0,9853846   | 5,481382706 | 10,42030581 | 0,001793713  | 0,00367332  |
| retinoblastoma binding protein 9                                                                | 1,263135757 | 7,699773235 | 10,41809898 | 0,001795279  | 0,00367332  |
| myosin, light chain 12B, regulatory                                                             | 1,213515289 | 8,72408927  | 10,40796364 | 0,001802492  | 0,003683724 |
| inositol 1,4,5-triphosphate receptor interacting protein-like 2                                 | 1,164673333 | 8,234915922 | 10,38850183 | 0,001816436  | 0,003707842 |
| NADH dehydrogenase (ubiquinone) Fe-S protein 4                                                  | 1,370821612 | 9,767699883 | 10,38128239 | 0,001821639  | 0,003714084 |
| MOB1, Mps One Binder kinase activator-like 3 (yeast)                                            | 1,17191993  | 6,463905724 | 10,37314192 | 0,001827528  | 0,003721706 |
| heterogeneous nuclear ribonucleoprotein D-like                                                  | 1,735057509 | 8,420016773 | 10,3626737  | 0,001835131  | 0,003728642 |
| calponin 2                                                                                      | 0,899876303 | 8,286652677 | 10,36252236 | 0,001835242  | 0,003728642 |
| stromal membrane-associated protein 1                                                           | 1,302133454 | 8,567208914 | 10,35781746 | 0,001838671  | 0,003731231 |
| gephyrin                                                                                        | 1,154765838 | 7,031527311 | 10,32343727 | 0,001863957  | 0,003776666 |
| RIKEN cDNA 4933424B01 gene                                                                      | 1,270069864 | 5,407682025 | 10,32145896 | 0,001865424  | 0,003776666 |
| zinc finger homeobox 2                                                                          | 1,106449448 | 8,862685449 | 10,29737013 | 0,001883395  | 0,003808593 |
| AHA1, activator of heat shock protein ATPase homolog 1 (yeast)                                  | 1,382473865 | 8,414490491 | 10,28542152 | 0,001892382  | 0,003822302 |
| vacuolar protein sorting 36 (yeast)                                                             | 1,270419914 | 9,479401034 | 10,27372723 | 0,001901226  | 0,00383569  |
| mannosidase 1, alpha                                                                            | 1,227364142 | 5,669451063 | 10,27070157 | 0,001903522  | 0,003835851 |
| Ral GEF with PH domain and SH3 binding motif 1                                                  | 1,272665807 | 5,080735824 | 10,23672666 | 0,001929521  | 0,003883722 |
| immunity-related GTPase family M member 1                                                       | 1,003520137 | 11,71558697 | 10,22933698 | 0,00193523   | 0,003890688 |
| cleavage and polyadenylation factor subunit homolog (S. cerevisiae)                             | 1,214575799 | 6,530431828 | 10,20443412 | 0,001954611  | 0,003925095 |
| membrane-associated ring finger (C3HC4) 5                                                       | 1,207698879 | 9,15626539  | 10,1895424  | 0,001966307  | 0,00394078  |
| RIKEN cDNA D030056L22 gene                                                                      | 0,879030503 | 9,202701066 | 10,18693268 | 0,001968365  | 0,00394078  |
| bifunctional apoptosis regulator                                                                | 1,178901916 | 7,080419748 | 10,18580969 | 0,001969252  | 0,00394078  |
| WD repeat domain 37                                                                             | 1,377413724 | 5,539620432 | 10,18254743 | 0,001971829  | 0,003941381 |
| RIKEN cDNA 1700123O20 gene                                                                      | 0,952647228 | 7,767304326 | 10,16111893 | 0,001988855  | 0,00396761  |
| RAB, member of RAS oncogene family-like 3                                                       | 1,46345392  | 5,53404676  | 10,15883835 | 0,001990677  | 0,00396761  |
| adducin 1 (alpha)                                                                               | 1,184165614 | 9,658984024 | 10,15739942 | 0,001991828  | 0,00396761  |
| polymerase (RNA) II (DNA directed) polypeptide D                                                | 1,181272616 | 7,676053275 | 10,15157243 | 0,001996494  | 0,003972336 |
| procollagen-proline, 2-oxoglutarate 4-dioxygenase (proline 4-hydroxylase), alpha II polypeptide | 0,939278032 | 5,980450304 | 10,14586884 | 0,002001075  | 0,003976878 |
| histocompatibility 2, T region locus 23                                                         | 0,993679236 | 11,38814523 | 10,1070794  | 0,0020232546 | 0,004034791 |
| stromal antigen 2                                                                               | 0,923213241 | 5,627701094 | 10,08950547 | 0,002046991  | 0,004058811 |
| pumilio 2 (Drosophila)                                                                          | 1,102613541 | 9,099358086 | 10,06748082 | 0,002065261  | 0,004090351 |
| male enhanced antigen 1                                                                         | 1,137589718 | 6,325256839 | 10,06291402 | 0,002069073  | 0,004093167 |
| polymerase (DNA directed), gamma 2, accessory subunit                                           | 1,076148384 | 5,857703112 | 10,06011615 | 0,002071412  | 0,004093167 |
| histone deacetylase 1                                                                           | 1,394625178 | 6,49574223  | 10,03340897 | 0,002093894  | 0,004132874 |
| zinc finger protein 523                                                                         | 1,196877067 | 9,069034442 | 10,02630938 | 0,002099917  | 0,004133431 |
| Ngfi-A binding protein 1                                                                        | 1,814141431 | 6,857692802 | 10,02529394 | 0,002100781  | 0,004133431 |
| activin A receptor, type 1B                                                                     | 1,373697796 | 6,062907718 | 10,02463659 | 0,00210134   | 0,004133431 |
| predicted gene, ENSMUSG00000068790                                                              | 0,838289368 | 6,078040237 | 10,01574734 | 0,002108915  | 0,004143624 |
| deoxycytidine kinase                                                                            | 1,027292712 | 4,97653911  | 10,00714848 | 0,002116273  | 0,004153366 |
| procollagen-proline, 2-oxoglutarate 4-dioxygenase (proline 4-hydroxylase), alpha 1 polypeptide  | 1,100234896 | 5,24456022  | 10,00120096 | 0,00212138   | 0,004158673 |

|                                                                         |             |             |             |             |             |
|-------------------------------------------------------------------------|-------------|-------------|-------------|-------------|-------------|
| Fc receptor, IgG, low affinity IIb                                      | 1,158501738 | 7,119648931 | 9,997519992 | 0,002124547 | 0,004160172 |
| attractin like 1                                                        | 1,234605717 | 5,063755594 | 9,947688082 | 0,002167967 | 0,004240396 |
| syntaxin 6                                                              | 1,223002498 | 5,267200606 | 9,937515377 | 0,002176955 | 0,004253171 |
| proteasome (prosome, macropain) subunit, beta type 5                    | 1,087476252 | 9,378692644 | 9,926547811 | 0,002186694 | 0,004267381 |
| TAP binding protein                                                     | 1,225540148 | 8,490257623 | 9,905349868 | 0,002205658 | 0,004299543 |
| SWI5 dependent recombination repair 1                                   | 1,349472009 | 6,405267535 | 9,878389529 | 0,00223005  | 0,004342202 |
| chemokine (C-X3-C motif) ligand 1                                       | 1,191034691 | 9,490534854 | 9,867770119 | 0,002239743 | 0,004356175 |
| 5-hydroxytryptamine (serotonin) receptor 2B                             | 1,371242781 | 5,170592859 | 9,846700471 | 0,002259118 | 0,004388926 |
| resistance to inhibitors of cholinesterase 8 homolog B (C. elegans)     | 1,396739454 | 5,812336597 | 9,832629905 | 0,002272163 | 0,004409322 |
| SRV-box containing gene 12                                              | 0,967896731 | 4,942139811 | 9,820896434 | 0,002283108 | 0,004425599 |
| ST3 beta-galactoside alpha-2,3-sialyltransferase 3                      | 1,138085223 | 10,38236328 | 9,795028096 | 0,002307452 | 0,004467785 |
| CCR4-NOT transcription complex, subunit 2                               | 1,232346718 | 8,604908019 | 9,787425346 | 0,002314663 | 0,004476774 |
| Eph receptor A8                                                         | 1,056868606 | 4,795547345 | 9,783118729 | 0,00231876  | 0,004479657 |
| EGL nine homolog 1 (C. elegans)                                         | 0,892383889 | 4,832661622 | 9,776088836 | 0,002325464 | 0,004487601 |
| ankyrin repeat domain 58                                                | 1,196032206 | 4,758140602 | 9,772333259 | 0,002329055 | 0,004489526 |
| coiled-coil domain containing 53                                        | 1,229455749 | 7,847642182 | 9,76358158  | 0,002337447 | 0,004500691 |
| RIKEN cDNA 1110038D17 gene                                              | 1,330163889 | 11,02857135 | 9,756691578 | 0,002344079 | 0,004508445 |
| protease (prosome, macropain) 26S subunit, ATPase 1                     | 1,234595486 | 9,513134539 | 9,750896001 | 0,0023497   | 0,00451424  |
| peptidyl-prolyl isomerase G (cyclophilin G)                             | 1,364220608 | 7,996751793 | 9,739008793 | 0,002361198 | 0,0045313   |
| cardiotrophin-like cytokine factor 1                                    | 0,8953667   | 5,399395399 | 9,732277363 | 0,002367752 | 0,004534668 |
| histocompatibility 2, T region locus 23                                 | 0,96578472  | 12,77280774 | 9,731826569 | 0,002368191 | 0,004534668 |
| CCR4-NOT transcription complex, subunit 2                               | 1,178178326 | 6,489014349 | 9,71855962  | 0,002386779 | 0,00456521  |
| PAN2 polyA specific ribonuclease subunit homolog (S. cerevisiae)        | 0,903051256 | 5,422257879 | 9,698739635 | 0,002400719 | 0,004586805 |
| family with sequence similarity 82, member A2                           | 0,898193218 | 5,317061592 | 9,683201324 | 0,002416172 | 0,004611239 |
| protein phosphatase 1B, magnesium dependent, beta isoform               | 0,978478155 | 5,872924791 | 9,680357058 | 0,002419013 | 0,004611576 |
| mediator of RNA polymerase II transcription, subunit 19 homolog (yeast) | 1,077797654 | 6,256562993 | 9,675850623 | 0,002423522 | 0,004615089 |
| cDNA sequence BC017647                                                  | 1,01437634  | 7,702931403 | 9,648591075 | 0,002451003 | 0,004662292 |
| PTPRF interacting protein, binding protein 1 (liprin beta 1)            | 1,276242264 | 5,619556223 | 9,644579925 | 0,002455076 | 0,004664915 |
| hypoxanthine guanine phosphoribosyl transferase                         | 1,427273732 | 7,890116761 | 9,639554645 | 0,002460191 | 0,004669507 |
| Ras and Rab interactor 2                                                | 0,995643146 | 6,655406741 | 9,601785255 | 0,002499026 | 0,004738022 |
| lectin, galactose binding, soluble 9                                    | 0,963949963 | 6,694989636 | 9,577791422 | 0,002524062 | 0,004780253 |
| phosphomannomutase 2                                                    | 1,223739095 | 7,255935615 | 9,572059102 | 0,002530086 | 0,004786425 |
| kelch-like 25 (Drosophila)                                              | 0,933791511 | 5,426973077 | 9,563120891 | 0,002539512 | 0,004799011 |
| IQ motif containing E                                                   | 1,34908361  | 5,879696886 | 9,556013224 | 0,002547036 | 0,004807981 |
| chromatin modifying protein 2A                                          | 1,454449965 | 7,511970529 | 9,551930322 | 0,002551369 | 0,004810915 |
| CREB regulated transcription coactivator 2                              | 1,07975598  | 5,437964084 | 9,519463696 | 0,002586132 | 0,004871158 |
| mitochondrial methionyl-tRNA formyltransferase                          | 1,310515934 | 5,034226146 | 9,511385329 | 0,002594866 | 0,004882296 |
| MyoD family inhibitor domain containing                                 | 1,48195757  | 8,52098167  | 9,492508833 | 0,002605078 | 0,004914491 |
| centromere protein L                                                    | 1,253827805 | 9,165746493 | 9,490452803 | 0,002617655 | 0,004914491 |
| synaptopodin 2                                                          | 1,318171313 | 4,830381987 | 9,470065425 | 0,002640071 | 0,004950916 |
| BCL2-associated transcription factor 1                                  | 1,140308753 | 5,167013534 | 9,467617975 | 0,002642777 | 0,004950916 |
| ADP-ribosylation factor-like 5A                                         | 1,193709373 | 9,572776288 | 9,449257978 | 0,002673176 | 0,004981582 |
| SH3-domain kinase binding protein 1                                     | 1,149065918 | 5,854142247 | 9,44771262  | 0,002664902 | 0,004981582 |
| low density lipoprotein receptor-related protein associated protein 1   | 1,242930657 | 12,39837003 | 9,438157777 | 0,002675597 | 0,00499618  |
| histocompatibility 2, class II antigen A, beta 1                        | 1,151085678 | 14,0077026  | 9,43124024  | 0,002683371 | 0,005005297 |
| stromal antigen 1                                                       | 1,269269236 | 6,826403882 | 9,409615076 | 0,002707842 | 0,005045506 |
| proteasome (prosome, macropain) 26S subunit, ATPase, 4                  | 1,133108588 | 11,58749815 | 9,403048314 | 0,002715324 | 0,005054006 |
| sideroflexin 4                                                          | 1,017713582 | 4,74469456  | 9,394316832 | 0,002725308 | 0,005067141 |
| interleukin 15 receptor, alpha chain                                    | 1,263571968 | 5,141842761 | 9,386895602 | 0,002733827 | 0,005077527 |
| corepressor interacting with RBPJ, 1                                    | 1,451346614 | 5,280771629 | 9,382400269 | 0,002739    | 0,005081681 |
| WD repeat domain 37                                                     | 1,170196367 | 5,743246911 | 9,373421844 | 0,002749373 | 0,005087618 |
| TWIST neighbor                                                          | 1,438031382 | 6,156690823 | 9,373250296 | 0,002749571 | 0,005087618 |
| glycerol kinase                                                         | 1,218743183 | 6,378159087 | 9,369580477 | 0,002753823 | 0,005087618 |
| zinc finger protein 760                                                 | 1,270832956 | 4,995553879 | 9,369466004 | 0,002753956 | 0,005087618 |
| cathepsin C                                                             | 1,102379909 | 10,94775755 | 9,356449667 | 0,002769099 | 0,005110139 |
| processing of precursor 5, ribonuclease P/MRP family (S. cerevisiae)    | 1,159832131 | 11,17079659 | 9,339630853 | 0,002788807 | 0,005141028 |
| cytochrome b5 reductase 3                                               | 1,200712033 | 7,573116146 | 9,330024555 | 0,002800136 | 0,005151709 |
| ataxin 10                                                               | 0,90791091  | 7,011992764 | 9,329401135 | 0,002800873 | 0,005151709 |
| trans-acting transcription factor 6                                     | 1,313876443 | 5,228913744 | 9,327155913 | 0,00280353  | 0,005151709 |
| Ras association (RalGDS/AF-6) domain family member 5                    | 1,2486414   | 8,69234442  | 9,313044549 | 0,00282029  | 0,00517431  |
| oral cancer overexpressed 1                                             | 1,122128565 | 8,083498348 | 9,311771849 | 0,002821808 | 0,00517431  |
| histocompatibility 2, T region locus 23                                 | 0,96151486  | 12,82978241 | 9,261076962 | 0,002883014 | 0,005280949 |
| amyloid beta (A4) precursor protein                                     | 1,133697892 | 10,79084623 | 9,256338127 | 0,002888812 | 0,005285977 |
| MAD homolog 1 (Drosophila)                                              | 1,289956342 | 7,669334152 | 9,238492935 | 0,002910769 | 0,00532053  |
| ISY1 splicing factor homolog (S. cerevisiae)                            | 1,255941121 | 10,85016544 | 9,234570346 | 0,002915621 | 0,005323777 |
| tetrapeptide repeat domain 39B                                          | 1,134687572 | 6,07198842  | 9,228601275 | 0,002923023 | 0,005331667 |
| crystallin, zeta                                                        | 1,35223742  | 4,82709996  | 9,22402699  | 0,002928709 | 0,005334604 |
| cytidine monophospho-N-acetylneuraminic acid synthetase                 | 1,013200316 | 9,553584339 | 9,222350273 | 0,002930796 | 0,005334604 |
| coiled-coil domain containing 25                                        | 1,489659249 | 5,700696278 | 9,207199047 | 0,002949737 | 0,005363441 |
| RING1 and YY1 binding protein                                           | 1,194600871 | 7,076435264 | 9,200445076 | 0,002958226 | 0,005368393 |
| family with sequence similarity 82, member A2                           | 1,023574746 | 7,514996721 | 9,200097357 | 0,002958664 | 0,005368393 |
| dephospho-CoA kinase domain containing                                  | 0,999041491 | 9,298687411 | 9,195645045 | 0,002964276 | 0,005372944 |
| DET1 and DDB1 associated 1                                              | 1,056984636 | 6,902696392 | 9,175464029 | 0,002989867 | 0,005413661 |
| MARCKS-like 1                                                           | 0,999608449 | 6,490172303 | 9,168183884 | 0,002999161 | 0,005424815 |
| PHD finger protein 13                                                   | 0,911559691 | 7,964706261 | 9,164997744 | 0,003003239 | 0,005426521 |
| family with sequence similarity 82, member A2                           | 0,953911861 | 6,815383451 | 9,157439323 | 0,003012938 | 0,00543837  |
| CD52 antigen                                                            | 1,113439024 | 10,81004463 | 9,144835207 | 0,003029193 | 0,005461965 |
| RNA binding motif protein 25                                            | 1,33288029  | 5,477598882 | 9,142418152 | 0,003032321 | 0,005461965 |
| polymerase (DNA directed), delta 2, regulatory subunit                  | 0,927752428 | 6,292339314 | 9,137758147 | 0,003038363 | 0,005467159 |
| neuroepithelial cell transforming gene 1                                | 1,200839309 | 10,60695837 | 9,08227878  | 0,003111369 | 0,00559271  |
| bicaudal D homolog 2 (Drosophila)                                       | 1,232412351 | 9,580738118 | 9,077157028 | 0,003118209 | 0,005599191 |

|                                                                                                         |             |             |             |             |             |
|---------------------------------------------------------------------------------------------------------|-------------|-------------|-------------|-------------|-------------|
| transcription factor Dp 2                                                                               | 1,175366955 | 6,100244233 | 9,073395088 | 0,003123245 | 0,005602421 |
| frizzled homolog 1 (Drosophila)                                                                         | 1,158469665 | 4,638140675 | 9,057700669 | 0,003144353 | 0,005632175 |
| PDZ domain containing 11                                                                                | 1,282683228 | 6,973060692 | 9,054056657 | 0,003149277 | 0,005632175 |
| mitochondrial fission factor                                                                            | 1,220911007 | 7,448307963 | 9,050772439 | 0,003153723 | 0,005632175 |
| death effector domain-containing thymopoietin                                                           | 1,169563793 | 7,693619529 | 9,047072228 | 0,00315874  | 0,005632175 |
| F-box protein 33                                                                                        | 0,981292167 | 5,971542994 | 9,047016552 | 0,003158816 | 0,005632175 |
| protein phosphatase 1K (PP2C domain containing)                                                         | 1,128056561 | 8,043159996 | 9,046620036 | 0,003159354 | 0,005632175 |
| ezrin                                                                                                   | 1,08017098  | 8,419316752 | 9,037386001 | 0,003171918 | 0,005648755 |
| dexamethasone-induced transcript                                                                        | 1,21387554  | 8,147028775 | 9,03238452  | 0,003178747 | 0,005653181 |
| PARK2 co-regulated-like                                                                                 | 1,054801288 | 9,282345552 | 9,030784602 | 0,003180935 | 0,005653181 |
| DEAD (Asp-Glu-Ala-Asp) box polypeptide 6                                                                | 1,272635503 | 5,159014772 | 9,022910873 | 0,003191729 | 0,005666546 |
| trimethylguanosine synthase homolog (S. cerevisiae)                                                     | 1,375912498 | 5,641399759 | 9,018881383 | 0,003197269 | 0,005670566 |
| AT rich interactive domain 3B (BRIGHT-like)                                                             | 1,386258145 | 6,329748065 | 9,013142845 | 0,003205177 | 0,005678774 |
| SMEK homolog 2, suppressor of mek1 (Dictyostelium)                                                      | 0,919466086 | 6,387722695 | 8,997747394 | 0,003226506 | 0,005710718 |
| chromodomain helicase DNA binding protein 2                                                             | 1,20395563  | 7,367963384 | 8,992247431 | 0,003234165 | 0,005718427 |
| chloride intracellular channel 4 (mitochondrial)                                                        | 1,166566158 | 6,534583593 | 8,963920981 | 0,003273943 | 0,005782852 |
| cyclin-dependent kinase inhibitor 1A (P21)                                                              | 1,299799476 | 7,926189972 | 8,956794137 | 0,003284039 | 0,005794772 |
| RIKEN cDNA 2310003L22 gene                                                                              | 0,897646058 | 8,967039494 | 8,944858021 | 0,003301028 | 0,005818819 |
| SCO cytochrome oxidase deficient homolog 1 (yeast)                                                      | 1,235263111 | 5,399549517 | 8,922445656 | 0,003333202 | 0,005869555 |
| SCO cytochrome oxidase deficient homolog 1 (yeast)                                                      | 0,97629275  | 7,735405648 | 8,915231725 | 0,003343634 | 0,005881941 |
| signal transducer and activator of transcription 1                                                      | 1,041287519 | 5,0739092   | 8,897679183 | 0,003369174 | 0,005914892 |
| DNA methyltransferase (cytosine-5) 1                                                                    | 0,959999176 | 4,653147419 | 8,897661672 | 0,003369199 | 0,005914892 |
| ADP-ribosylation factor-like 3                                                                          | 1,25986425  | 8,180098278 | 8,890778358 | 0,003379276 | 0,005926572 |
| resistance to inhibitors of cholinesterase 8 homolog B (C. elegans)                                     | 1,060358206 | 7,529909435 | 8,858598535 | 0,003426845 | 0,006003916 |
| protein tyrosine phosphatase, receptor type, f polypeptide (PTPRF), interacting protein (liprin), alpha | 0,998555869 | 6,491716055 | 8,856083908 | 0,003430595 | 0,006004408 |
| TAP binding protein-like                                                                                | 0,919760246 | 6,347731652 | 8,84729857  | 0,003447583 | 0,006018871 |
| RIKEN cDNA 2310003C23 gene                                                                              | 1,375507549 | 5,714814337 | 8,843799953 | 0,003448979 | 0,006018871 |
| calcium-binding tyrosine-(Y)-phosphorylation regulated (fibrousheathin 2)                               | 1,044911798 | 7,00649645  | 8,843593007 | 0,003449289 | 0,006018871 |
| RIKEN cDNA 1110038F14 gene                                                                              | 0,98674414  | 5,178730729 | 8,839991772 | 0,003454701 | 0,006022243 |
| MIT, microtubule interacting and transport, domain containing 1                                         | 1,172816766 | 9,851078074 | 8,838232988 | 0,003463983 | 0,006029555 |
| steroid receptor RNA activator 1                                                                        | 1,052453733 | 7,792306823 | 8,832584613 | 0,003465862 | 0,006029555 |
| Dnaj (Hsp40) homolog, subfamily B, member 2                                                             | 1,170510059 | 8,844103602 | 8,817555752 | 0,003488635 | 0,00606308  |
| COP9 (constitutive photomorphogenic) homolog, subunit 5 (Arabidopsis thaliana)                          | 1,288131697 | 9,370935492 | 8,812272625 | 0,003496681 | 0,006070347 |
| RIKEN cDNA 5830418K08 gene                                                                              | 1,172816766 | 9,851078074 | 8,808415434 | 0,003502569 | 0,006070347 |
| kelch-like ECH-associated protein 1                                                                     | 1,270145468 | 5,184089519 | 8,807912669 | 0,003503337 | 0,006070347 |
| retinoblastoma binding protein 9                                                                        | 1,315210021 | 8,704863243 | 8,798919432 | 0,003517113 | 0,006088122 |
| dual adaptor for phosphotyrosine and 3-phosphoinositides 1                                              | 1,205115404 | 7,9865577   | 8,782408033 | 0,003542567 | 0,006114731 |
| protein phosphatase methylesterase 1                                                                    | 1,304468992 | 5,519959718 | 8,782148254 | 0,003502569 | 0,006114731 |
| tyrosine 3-monooxygenase/tryptophan 5-monooxygenase activation protein, epsilon polypeptide             | 1,179404857 | 10,03789207 | 8,782074982 | 0,003543082 | 0,006114731 |
| pyrophosphatase (inorganic) 2                                                                           | 1,531190165 | 5,72527088  | 8,773028944 | 0,003557119 | 0,006132842 |
| TGFB-induced factor homeobox 1                                                                          | 1,028664573 | 6,464111706 | 8,767547797 | 0,003565656 | 0,006141443 |
| UBX domain protein 7                                                                                    | 1,116904677 | 7,272242925 | 8,752232984 | 0,003589632 | 0,006176593 |
| coiled-coil domain containing 41                                                                        | 1,131831916 | 6,394552382 | 8,736823655 | 0,003613943 | 0,006212249 |
| minichromosome maintenance deficient 6 (MIS5 homolog, S. pombe) (S. cerevisiae)                         | 1,118430135 | 8,073539522 | 8,734025086 | 0,003618378 | 0,006213703 |
| eukaryotic translation initiation factor 4E binding protein 1                                           | 1,340509963 | 8,269137211 | 8,721693599 | 0,003637997 | 0,006241202 |
| RIKEN cDNA 2900064A13 gene                                                                              | 1,316237168 | 9,35277987  | 8,718221732 | 0,003643542 | 0,006244527 |
| erythrocyte protein band 4.1-like 2                                                                     | 1,605543924 | 6,961842598 | 8,710159191 | 0,003656458 | 0,006258518 |
| membrane-associated ring finger (C3HC4) 5                                                               | 1,1261295   | 6,203853713 | 8,708615407 | 0,003658937 | 0,006258518 |
| Rho guanine nucleotide exchange factor (GEF) 5                                                          | 1,238658254 | 7,00769403  | 8,701628076 | 0,003670181 | 0,006271554 |
| general transcription factor IIB                                                                        | 0,946285432 | 4,904814347 | 8,688023485 | 0,003692188 | 0,006302937 |
| SAP domain containing ribonucleoprotein                                                                 | 1,10493647  | 4,799396862 | 8,677224346 | 0,003709765 | 0,006326703 |
| DEAD (Asp-Glu-Ala-Asp) box polypeptide 58                                                               | 1,455719991 | 5,984249809 | 8,666487359 | 0,003727336 | 0,006350412 |
| guanosine monophosphate reductase                                                                       | 0,884000133 | 5,54405995  | 8,654832809 | 0,003746516 | 0,006376813 |
| serine/threonine kinase 40                                                                              | 1,240176942 | 5,811257867 | 8,648515659 | 0,00375696  | 0,006388308 |
| DEAD (Asp-Glu-Ala-Asp) box polypeptide 10                                                               | 1,175600095 | 6,14480108  | 8,642966372 | 0,003766162 | 0,00639767  |
| nuclear pore membrane protein 121                                                                       | 1,200717312 | 5,299555312 | 8,637864716 | 0,003774644 | 0,006405793 |
| GTPase activating protein (SH3 domain) binding protein 2                                                | 1,258777876 | 6,378213329 | 8,60537405  | 0,003829182 | 0,006491982 |
| fascin homolog 1, actin bundling protein (Strongylocentrotus purpuratus)                                | 1,29244569  | 9,88454263  | 8,596993683 | 0,003843395 | 0,006509703 |
| Treacher Collins Franceschetti syndrome 1, homolog                                                      | 1,342854791 | 12,869153   | 8,576432319 | 0,003878524 | 0,006562782 |
| polymerase (DNA-directed), delta 4                                                                      | 1,522378321 | 6,334416988 | 8,554451984 | 0,003916486 | 0,006611753 |
| axin interactor, dorsalization associated                                                               | 0,992690037 | 8,946176464 | 8,553745443 | 0,003917713 | 0,006611753 |
| praja1, RING-H2 motif containing                                                                        | 1,119343803 | 9,34854955  | 8,553048314 | 0,003918925 | 0,006611753 |
| solute carrier family 30 (zinc transporter), member 7                                                   | 1,336723911 | 8,49739326  | 8,542887973 | 0,003936629 | 0,006635155 |
| NADH dehydrogenase (ubiquinone) 1 alpha subcomplex, 5                                                   | 1,275156121 | 8,136774619 | 8,531573044 | 0,003956453 | 0,006662082 |
| staufen (RNA binding protein) homolog 1 (Drosophila)                                                    | 1,457072935 | 5,48261153  | 8,51994409  | 0,003976947 | 0,006690082 |
| mitochondrial translational release factor 1-like                                                       | 1,098496166 | 7,982407742 | 8,502573525 | 0,004007786 | 0,006735415 |
| histocompatibility 2, class II antigen A, beta 1                                                        | 1,286374668 | 6,943486464 | 8,496108846 | 0,004019333 | 0,006740708 |
| structural maintenance of chromosomes 3                                                                 | 1,129530991 | 14,44757054 | 8,495840729 | 0,004019813 | 0,006740708 |
| zinc finger protein 429                                                                                 | 1,231777764 | 6,009480737 | 8,494273828 | 0,004022618 | 0,006740708 |
| myosin, light polypeptide 6, alkali, smooth muscle and non-muscle                                       | 1,045474149 | 7,060059992 | 8,480454415 | 0,004047453 | 0,006775765 |
| glutamate dehydrogenase 1                                                                               | 1,156339384 | 13,41360565 | 8,471958535 | 0,004062809 | 0,0067949   |
| transporthin 3                                                                                          | 0,919061799 | 11,13268291 | 8,450279106 | 0,004102296 | 0,006854319 |
| RIKEN cDNA 8430410A17 gene                                                                              | 1,066248126 | 7,351646177 | 8,443527016 | 0,004114684 | 0,006866674 |
| dynactin 4                                                                                              | 1,42350677  | 5,402972007 | 8,441928081 | 0,004117624 | 0,006866674 |
| family with sequence similarity 3, member C                                                             | 1,240346344 | 9,713487385 | 8,436800012 | 0,004127069 | 0,006875801 |
| Smg-7 homolog, nonsense mediated mRNA decay factor (C. elegans)                                         | 1,102014317 | 9,140863304 | 8,424795737 | 0,004149276 | 0,006906151 |
| preproenkephalin                                                                                        | 1,069374196 | 7,684827094 | 8,416965267 | 0,004163836 | 0,006923727 |
| MYC-associated zinc finger protein (purine-binding transcription factor)                                | 1,140529265 | 4,952241722 | 8,412966742 | 0,004171293 | 0,006926834 |
| phosphatidylinositol 3-kinase, regulatory subunit, polypeptide 1 (p85 alpha)                            | 0,91632731  | 4,624273658 | 8,411442584 | 0,00417414  | 0,006926834 |
| pleckstrin homology domain-containing, family A (phosphoinositide binding specific) member 3            | 1,019807409 | 4,866155448 | 8,407637412 | 0,004181256 | 0,006926834 |
|                                                                                                         | 1,301001297 | 6,607059271 | 8,407394516 | 0,004181711 | 0,006926834 |

|                                                                                                |             |             |             |             |             |
|------------------------------------------------------------------------------------------------|-------------|-------------|-------------|-------------|-------------|
| ring finger protein 25                                                                         | 1,164693912 | 6,783424302 | 8,404013751 | 0,004188046 | 0,006930696 |
| LXR motif containing 2                                                                         | 1,361285485 | 7,839144756 | 8,395048276 | 0,004202049 | 0,00695194  |
| bromodomain containing 2                                                                       | 1,210160736 | 10,07728934 | 8,391515022 | 0,004211563 | 0,006956313 |
| differentially expressed in FDCP 6                                                             | 1,131937973 | 7,043925721 | 8,38105809  | 0,004231355 | 0,00698234  |
| GTP cyclohydrolase 1                                                                           | 1,491822079 | 6,040772358 | 8,359257437 | 0,00427296  | 0,00704428  |
| dynein light chain Ctlex-type 3                                                                | 1,42888779  | 10,17786193 | 8,354051104 | 0,004282966 | 0,007054057 |
| cDNA sequence BC017643                                                                         | 1,220984254 | 8,895688863 | 8,350998613 | 0,004288844 | 0,007057024 |
| S-adenosylhomocysteine hydrolase-like 1                                                        | 1,213134949 | 8,635163863 | 8,347946016 | 0,004294732 | 0,007060002 |
| interferon, alpha-inducible protein 27 like 1                                                  | 1,278224911 | 10,67159599 | 8,342735021 | 0,004304805 | 0,007069846 |
| leucyl-tRNA synthetase                                                                         | 1,141266608 | 6,83511453  | 8,337185605 | 0,004315562 | 0,007076412 |
| ER degradation enhancer, mannosidase alpha-like 2                                              | 1,135916733 | 12,14723177 | 8,336455807 | 0,004316979 | 0,007076412 |
| aldo-keto reductase family 1, member B10 (aldose reductase)                                    | 0,969207651 | 7,140182078 | 8,314405001 | 0,004360044 | 0,007140242 |
| family with sequence similarity 20, member B                                                   | 1,282948452 | 6,345466758 | 8,309437058 | 0,004369814 | 0,00714423  |
| TBC1 domain family, member 7                                                                   | 1,202248598 | 6,917008033 | 8,308969907 | 0,004370734 | 0,00714423  |
| histocompatibility 2, class II antigen E beta                                                  | 1,009391255 | 13,83597518 | 8,277717599 | 0,004432789 | 0,007238829 |
| Ngg1 interacting factor 3-like 1 (S. pombe)                                                    | 1,308521533 | 6,455839487 | 8,268539727 | 0,004451205 | 0,00726205  |
| archaelysin family metallopeptidase 2                                                          | 1,120421297 | 6,414066894 | 8,24112289  | 0,004506741 | 0,007345733 |
| proline-rich coiled-coil 2C                                                                    | 1,316715221 | 6,421590126 | 8,228859712 | 0,004531839 | 0,007379692 |
| purinergic receptor P2Y, G-protein coupled 10                                                  | 1,276385296 | 6,235775427 | 8,214486756 | 0,004561458 | 0,007420944 |
| zinc finger homeobox 3                                                                         | 1,230620989 | 4,858585958 | 8,200330265 | 0,004590849 | 0,007455843 |
| intraflagellar transport 20 homolog (Chlamydomonas)                                            | 1,369541232 | 7,557617848 | 8,200006172 | 0,004591525 | 0,007455843 |
| zinc finger protein 106                                                                        | 1,269047205 | 5,196623418 | 8,192514216 | 0,004607169 | 0,007474236 |
| cancer susceptibility candidate 1                                                              | 0,908160641 | 4,995101359 | 8,182346413 | 0,0046285   | 0,00750181  |
| mitochondrial transcription termination factor                                                 | 1,201834906 | 6,91040475  | 8,179484967 | 0,004634523 | 0,007504546 |
| pyruvate dehydrogenase (lipoamide) beta                                                        | 1,257908272 | 8,328883978 | 8,172190507 | 0,004649918 | 0,007519528 |
| phosphatase and tensin homolog                                                                 | 1,230019608 | 6,214714535 | 8,170598681 | 0,004653286 | 0,007519528 |
| proliferation-associated 2G4                                                                   | 1,101061268 | 7,953998618 | 8,168935093 | 0,004656808 | 0,007519528 |
| mechanistic target of rapamycin (serine/threonine kinase)                                      | 1,018424439 | 8,594464282 | 8,152356527 | 0,004692076 | 0,007569417 |
| sorcin                                                                                         | 1,296754003 | 11,31495146 | 8,147362875 | 0,004702759 | 0,007579587 |
| a disintegrin-like and metallopeptidase (repolysin type) with thrombospondin type 1 motif, 7   | 1,31674507  | 5,1357819   | 8,120583255 | 0,004760529 | 0,007665558 |
| YTH domain containing 1                                                                        | 1,116024112 | 8,226816381 | 8,11474162  | 0,004773238 | 0,007675093 |
| inter-alpha trypsin inhibitor, heavy chain 3                                                   | 1,256670767 | 5,818103669 | 8,113787302 | 0,004775318 | 0,007675093 |
| SAM domain and HD domain, 1                                                                    | 1,564558618 | 5,734675483 | 8,094925787 | 0,004816641 | 0,007734329 |
| promyelocytic leukemia                                                                         | 1,030430302 | 5,617937087 | 8,087956633 | 0,004832014 | 0,007751822 |
| PRP38 pre-mRNA processing factor 38 (yeast) domain containing A                                | 1,27028541  | 5,647275387 | 8,076288617 | 0,004857877 | 0,007781712 |
| PHD finger protein 20                                                                          | 1,308612719 | 8,971383325 | 8,075497178 | 0,004859637 | 0,007781712 |
| zinc finger protein 410                                                                        | 1,074372091 | 5,104499573 | 8,057443633 | 0,004899984 | 0,007839069 |
| E2F transcription factor 3                                                                     | 0,924046046 | 6,418009342 | 8,054977451 | 0,004905525 | 0,007840687 |
| crystallin, gamma N                                                                            | 1,2253077   | 5,123421945 | 8,049964797 | 0,00491681  | 0,007851475 |
| Tctex1 domain containing 2                                                                     | 1,286874199 | 10,98753802 | 8,03880333  | 0,004942046 | 0,007884499 |
| StAR-related lipid transfer (START) domain containing 6                                        | 1,424975041 | 5,082300375 | 8,031286883 | 0,004959124 | 0,0078993   |
| mitochondrial methionyl-tRNA formyltransferase                                                 | 1,067833859 | 5,208009979 | 8,029674186 | 0,004962797 | 0,0078993   |
| protease (prosome, macropain) 26S subunit, ATPase 5                                            | 1,125678762 | 10,333767   | 8,028701731 | 0,004965013 | 0,0078993   |
| proteasome (prosome, macropain) 26S subunit, non-ATPase, 2                                     | 1,124398626 | 4,987356528 | 8,011145749 | 0,005005221 | 0,007959597 |
| mitogen-activated protein kinase binding protein 1                                             | 1,132587632 | 6,22740424  | 7,99542443  | 0,005041544 | 0,008006104 |
| destrin                                                                                        | 1,041435403 | 4,681354678 | 7,993496297 | 0,005046019 | 0,008006104 |
| dexamethasone-induced transcript                                                               | 1,115443972 | 8,54601441  | 7,984598936 | 0,005066731 | 0,008031604 |
| serine/threonine kinase 24 (STE20 homolog, yeast)                                              | 1,129358127 | 10,09798506 | 7,970893764 | 0,005098826 | 0,008075084 |
| zinc finger and BTB domain containing 46                                                       | 1,289100491 | 6,774222947 | 7,965495308 | 0,005111532 | 0,008087807 |
| solute carrier family 25 (mitochondrial carrier, citrate transporter), member 1                | 1,220359491 | 6,356197499 | 7,962831377 | 0,005117815 | 0,008089553 |
| torsin A interacting protein 2                                                                 | 1,084133857 | 6,120486933 | 7,95805792  | 0,005129096 | 0,008089553 |
| homer homolog 1 (Drosophila)                                                                   | 1,317718761 | 7,006901649 | 7,957552262 | 0,005130293 | 0,008089553 |
| mannose-6-phosphate receptor, cation dependent                                                 | 1,467611602 | 8,342306573 | 7,957114791 | 0,005131328 | 0,008089553 |
| eukaryotic translation initiation factor 4A2                                                   | 1,23811791  | 10,96193616 | 7,952475932 | 0,005142324 | 0,008099511 |
| transcription factor Dp 2                                                                      | 0,995266853 | 5,513638609 | 7,936042889 | 0,005181494 | 0,008151482 |
| zinc finger, HIT type 3                                                                        | 1,204137944 | 5,552922073 | 7,931522259 | 0,00519233  | 0,008151482 |
| non-POU-domain-containing, octamer binding protein                                             | 1,258111674 | 5,865294764 | 7,931430673 | 0,00519255  | 0,008151482 |
| mitochondrial ribosomal protein L20                                                            | 1,378554593 | 9,615599125 | 7,930761302 | 0,005194156 | 0,008151482 |
| melanoma associated antigen (mutated) 1                                                        | 1,224238978 | 8,965455495 | 7,918284717 | 0,005224208 | 0,008189604 |
| hect (homologous to the E6-AP (UBE3A) carboxyl terminus) domain and RCC1 (CHC1)-like domain (f | 0,939934543 | 9,883729067 | 7,916753661 | 0,00522791  | 0,008189604 |
| TAF9B RNA polymerase II, TATA box binding protein (TBP)-associated factor                      | 1,371147408 | 7,83355722  | 7,900830074 | 0,005266586 | 0,008247232 |
| transmembrane protein 188                                                                      | 1,151872509 | 8,028323227 | 7,894811288 | 0,005281291 | 0,008258278 |
| serine (or cysteine) peptidase inhibitor, clade B, member 6b                                   | 1,461531076 | 9,943077428 | 7,842450767 | 0,005411216 | 0,008453804 |
| signal recognition particle receptor ('docking protein')                                       | 1,106715262 | 7,172134193 | 7,835398828 | 0,005428993 | 0,008473929 |
| proline rich Gla (G-carboxyglutamic acid) 3 (transmembrane)                                    | 1,139524424 | 4,978063107 | 7,832338617 | 0,005436728 | 0,008478358 |
| rhomoid domain containing 2                                                                    | 1,088415094 | 4,656399418 | 7,824475215 | 0,005456662 | 0,008501785 |
| transmembrane protein 199                                                                      | 1,312827896 | 9,925317433 | 7,820999698 | 0,0054655   | 0,00850502  |
| PRELI domain containing 2                                                                      | 1,123912974 | 8,356702412 | 7,819795325 | 0,005468566 | 0,00850502  |
| poly(A) binding protein, cytoplasmic 1                                                         | 1,244703735 | 9,562457593 | 7,814075377 | 0,005483155 | 0,008520056 |
| golgi SNAP receptor complex member 2                                                           | 1,223060545 | 9,821363395 | 7,786584963 | 0,005553899 | 0,008622241 |
| guanylate binding protein 5                                                                    | 1,078631698 | 4,531084576 | 7,784146008 | 0,005560225 | 0,008624328 |
| SCY1-like 2 (S. cerevisiae)                                                                    | 1,299578915 | 5,048325608 | 7,764408196 | 0,005611731 | 0,008696425 |
| nuclear undecaprenyl pyrophosphate synthase 1 homolog (S. cerevisiae)                          | 1,342795137 | 9,66789778  | 7,75536564  | 0,00563551  | 0,00872116  |
| retinoblastoma binding protein 6                                                               | 1,10679161  | 5,156460584 | 7,754509203 | 0,005637769 | 0,00872116  |
| syntaphilin                                                                                    | 0,926571437 | 5,056333078 | 7,752288961 | 0,005643628 | 0,008722428 |
| F-box and WD-40 domain protein 17                                                              | 0,956153832 | 9,888996221 | 7,731286342 | 0,005699397 | 0,008800764 |
| amyloid beta precursor protein (cytoplasmic tail) binding protein 2                            | 1,147365706 | 9,005193626 | 7,728571469 | 0,005706652 | 0,008804113 |
| gephyrin                                                                                       | 1,240541392 | 7,121586334 | 7,724073911 | 0,005718695 | 0,008814835 |
| sterol-C4-methyl oxidase-like                                                                  | 0,947386118 | 9,474611022 | 7,720863037 | 0,005727309 | 0,008820032 |
| RIKEN cDNA 4933437N03 gene                                                                     | 1,141878633 | 4,891123488 | 7,719021633 | 0,005732257 | 0,008820032 |
| ubiquitin-conjugating enzyme E2H                                                               | 1,156353863 | 9,155530089 | 7,715531977 | 0,005741646 | 0,008826633 |



|                                                                                              |             |             |             |             |             |
|----------------------------------------------------------------------------------------------|-------------|-------------|-------------|-------------|-------------|
| uridine-cytidine kinase 1                                                                    | 1,141432609 | 5,829848531 | 7,706661846 | 0,005765591 | 0,008854127 |
| zinc finger protein 607                                                                      | 0,916324764 | 6,044737582 | 7,705121562 | 0,005769761 | 0,008854127 |
| methionine adenosyltransferase II, alpha                                                     | 1,300253033 | 7,012690702 | 7,702909434 | 0,005775755 | 0,008855476 |
| nuclear antigen Sp100                                                                        | 0,986781578 | 4,641170026 | 7,694069924 | 0,00579978  | 0,008884442 |
| hypermethylated in cancer 1                                                                  | 0,989429987 | 4,695020205 | 7,685949986 | 0,00582195  | 0,008910518 |
| integrator complex subunit 3                                                                 | 1,097344071 | 10,5207332  | 7,669384028 | 0,005867483 | 0,008972273 |
| tumor necrosis factor receptor superfamily, member 13b                                       | 1,227644014 | 4,91459225  | 7,659494952 | 0,005894859 | 0,009004488 |
| jumonji domain containing 7                                                                  | 0,929077042 | 5,800399315 | 7,657136191 | 0,00590141  | 0,009004488 |
| RIKEN cDNA 9930023K05 gene                                                                   | 1,443433665 | 4,939912323 | 7,656148349 | 0,005904156 | 0,009004488 |
| steroid receptor RNA activator 1                                                             | 1,305790907 | 9,170317516 | 7,650886138 | 0,005918809 | 0,00901889  |
| proteasome (prosome, macropain) 26S subunit, non-ATPase, 7                                   | 1,274800636 | 9,157385631 | 7,646109137 | 0,005932148 | 0,009027811 |
| ribosome production factor 1 homolog (S. cerevisiae)                                         | 1,319259726 | 7,053355747 | 7,645055256 | 0,005935095 | 0,009027811 |
| nuclear factor of kappa light polypeptide gene enhancer in B-cells 1, p105                   | 1,118249244 | 10,41279215 | 7,633890781 | 0,005966421 | 0,009061796 |
| inhibitor of growth family, member 1                                                         | 1,30498184  | 7,032276396 | 7,633362761 | 0,005967907 | 0,009061796 |
| low density lipoprotein receptor-related protein 8, apolipoprotein e receptor                | 1,407270034 | 4,89029695  | 7,629319677 | 0,005979301 | 0,00907114  |
| PDZ domain containing 11                                                                     | 1,294550105 | 7,667273821 | 7,624614936 | 0,005992592 | 0,009083342 |
| coiled-coil domain containing 6                                                              | 1,214426868 | 7,749647773 | 7,61536667  | 0,006018816 | 0,00910615  |
| cyclin I1                                                                                    | 1,129515269 | 6,595082994 | 7,614323665 | 0,006021782 | 0,00910615  |
| glutathione S-transferase kappa 1                                                            | 1,006720608 | 6,339319507 | 7,613747242 | 0,006023421 | 0,00910615  |
| protein kinase D3                                                                            | 1,099881024 | 6,684362685 | 7,601033501 | 0,006059719 | 0,009145192 |
| ubiquitin specific peptidase 42                                                              | 1,069136822 | 7,05932124  | 7,601000871 | 0,006059813 | 0,009145192 |
| caseinolytic peptidase X (E.coli)                                                            | 1,281778512 | 7,117994261 | 7,59338666  | 0,006082385 | 0,009171262 |
| histocompatibility 2, T region locus 10                                                      | 1,104808824 | 8,442518526 | 7,59109665  | 0,006088263 | 0,009172136 |
| A kinase (PRKA) anchor protein 2                                                             | 1,278094909 | 5,526996563 | 7,583421829 | 0,006110416 | 0,009197504 |
| nudix (nucleoside diphosphate linked moiety X)-type motif 5                                  | 1,243534868 | 9,018065674 | 7,567181449 | 0,006157596 | 0,009260468 |
| serum response factor                                                                        | 1,299636235 | 8,400514088 | 7,55407962  | 0,006195963 | 0,00931008  |
| retrotransposon gag domain containing 4                                                      | 1,265165006 | 5,27126783  | 7,537216217 | 0,00624575  | 0,009376751 |
| apoptotic peptidase activating factor 1                                                      | 1,253557464 | 9,822297826 | 7,532416224 | 0,006260005 | 0,009390008 |
| interferon activated gene 204                                                                | 0,994131743 | 4,668908069 | 7,528710903 | 0,006271035 | 0,009396651 |
| coiled-coil domain containing 53                                                             | 1,276452134 | 7,475088333 | 7,52728298  | 0,006275291 | 0,009396651 |
| acyl-Coenzyme A dehydrogenase family, member 9                                               | 1,302768277 | 6,645334773 | 7,52509469  | 0,006281821 | 0,009398299 |
| pleckstrin homology domain-containing, family A (phosphoinositide binding specific) member 2 | 1,025656069 | 11,19604915 | 7,520232422 | 0,006296357 | 0,009411911 |
| thioredoxin-like 4A                                                                          | 1,109968757 | 9,195218355 | 7,489383037 | 0,006389486 | 0,009542882 |
| makorin, ring finger protein, 2                                                              | 1,246614493 | 7,707786205 | 7,484306577 | 0,00640771  | 0,00956185  |
| synovial sarcoma translocation gene on chromosome 18-like 1                                  | 1,307169986 | 4,992994927 | 7,477013711 | 0,00642727  | 0,009582777 |
| wings apart-like homolog (Drosophila)                                                        | 1,207579796 | 7,210696145 | 7,472839595 | 0,006440078 | 0,00959361  |
| HMG box domain containing 3                                                                  | 1,128295433 | 9,724893634 | 7,468901943 | 0,006452187 | 0,009603384 |
| neutral sphingomyelinase (N-SMase) activation associated factor                              | 1,007591256 | 8,49800277  | 7,46236515  | 0,006472348 | 0,009625115 |
| RIKEN cDNA 1700003F12 gene                                                                   | 1,110256203 | 4,65475086  | 7,458005303 | 0,006485834 | 0,009636892 |
| IQ motif and Sec7 domain 2                                                                   | 0,965956095 | 5,716168993 | 7,452148933 | 0,006504    | 0,009655596 |
| progesterone receptor membrane component 2                                                   | 1,317176277 | 5,226925972 | 7,446163798 | 0,006522627 | 0,00967495  |
| DCP2 decapping enzyme homolog (S. cerevisiae)                                                | 1,01523771  | 6,035183654 | 7,440773157 | 0,006539455 | 0,009691607 |
| histidine rich calcium binding protein                                                       | 1,121122243 | 4,814099515 | 7,437635126 | 0,006549274 | 0,009697856 |
| serum amyloid A 1                                                                            | 1,187109075 | 5,07588512  | 7,43039337  | 0,006571999 | 0,009723188 |
| dynein light chain roadblock-type 1                                                          | 1,225730578 | 11,33966013 | 7,419271972 | 0,006607074 | 0,009766734 |
| lysine (K)-specific demethylase 5A                                                           | 1,361894991 | 5,727397606 | 7,404189521 | 0,006654986 | 0,009829165 |
| RIKEN cDNA O610007P14 gene                                                                   | 1,257491946 | 8,206167675 | 7,391793562 | 0,006694662 | 0,009879335 |
| armadillo repeat containing 8                                                                | 1,068441531 | 4,757535977 | 7,388937198 | 0,006703843 | 0,009884457 |
| adaptor-related protein complex 3, mu 2 subunit                                              | 1,077010359 | 8,622145431 | 7,384118801 | 0,006719363 | 0,009898908 |
| chromodomain helicase DNA binding protein 1                                                  | 1,246973064 | 6,51866345  | 7,380969377 | 0,006729529 | 0,009905455 |
| protein kinase, DNA activated, catalytic polypeptide                                         | 1,009531342 | 4,883492969 | 7,375358793 | 0,006747684 | 0,009923739 |
| proteasome (prosome, macropain) subunit, beta type 7                                         | 1,082137867 | 10,83551954 | 7,370547372 | 0,006763298 | 0,009938258 |
| thiosulfate sulfurtransferase (rhodanese)-like domain containing 2                           | 1,425514675 | 5,616599083 | 7,367588101 | 0,006772922 | 0,009943959 |
| hypothetical LOC100505101                                                                    | 1,17448282  | 7,137878908 | 7,362726844 | 0,006907424 | 0,01013284  |
| malonyl CoA:ACP acyltransferase (mitochondrial)                                              | 1,342913699 | 5,647286925 | 7,322304159 | 0,006922165 | 0,010145866 |
| zinc finger protein 948                                                                      | 1,211257986 | 4,92980553  | 7,316878315 | 0,006940299 | 0,010163838 |
| cyclin G1                                                                                    | 1,051470529 | 9,02380734  | 7,313469653 | 0,006951719 | 0,010171957 |
| kit oncogene                                                                                 | 1,329220252 | 9,135880695 | 7,309543977 | 0,006964898 | 0,010182633 |
| solute carrier family 25 (mitochondrial carrier, peroxisomal membrane protein), member 17    | 1,204764128 | 8,367530884 | 7,297858743 | 0,007004296 | 0,010226806 |
| protein prenyltransferase alpha subunit repeat containing 1                                  | 1,263873532 | 4,956008375 | 7,297080846 | 0,007006928 | 0,010226806 |
| insulin-like growth factor binding protein 4                                                 | 1,027775392 | 7,076455606 | 7,29516854  | 0,007013402 | 0,010227632 |
| nuclear transcription factor-Y beta                                                          | 1,044818219 | 7,466966765 | 7,288930374 | 0,007034571 | 0,010249868 |
| protein phosphatase 1, regulatory subunit 3D                                                 | 1,080910832 | 6,481231379 | 7,286318566 | 0,007043456 | 0,010250351 |
| zinc finger, AN1-type domain 6                                                               | 1,544890872 | 7,308445227 | 7,285352271 | 0,007046746 | 0,010250351 |
| male-specific lethal 2 homolog (Drosophila)                                                  | 1,229951345 | 5,175381709 | 7,283018834 | 0,007054699 | 0,010253304 |
| zinc finger and BTB domain containing 40                                                     | 1,190457269 | 6,402572711 | 7,264595643 | 0,007117853 | 0,010336413 |
| glucosamine-6-phosphate deaminase 1                                                          | 1,131279083 | 7,325640452 | 7,261900812 | 0,007127145 | 0,010338627 |
| OTU domain, ubiquitin aldehyde binding 2                                                     | 1,302771393 | 4,953896276 | 7,259935981 | 0,007133929 | 0,010338627 |
| protein phosphatase 1F (PP2C domain containing)                                              | 1,308256483 | 9,308084305 | 7,258961567 | 0,007137296 | 0,010338627 |
| Rho-associated coiled-coil containing protein kinase 1                                       | 1,051099238 | 6,909654482 | 7,251203093 | 0,007164166 | 0,010368873 |
| low density lipoprotein receptor-related protein 8, apolipoprotein e receptor                | 1,013303937 | 4,676793293 | 7,219870523 | 0,007273885 | 0,010518876 |
| annexin A2                                                                                   | 1,141144137 | 13,94405599 | 7,197721564 | 0,007352605 | 0,010623884 |
| dual adaptor for phosphotyrosine and 3-phosphoinositides 1                                   | 1,251744577 | 8,215273387 | 7,180482675 | 0,007414551 | 0,010704411 |
| ring finger protein, transmembrane 2                                                         | 1,155248545 | 4,978126026 | 7,174379335 | 0,007436626 | 0,010727333 |
| SR-related CTD-associated factor 8                                                           | 1,329094049 | 5,528851195 | 7,171790942 | 0,007446011 | 0,010731927 |
| ERGIC and golgi 2                                                                            | 1,266531307 | 7,293377424 | 7,162472041 | 0,00747991  | 0,010771818 |
| nudix (nucleoside diphosphate linked moiety X)-type motif 5                                  | 1,270152593 | 8,780644042 | 7,159859018 | 0,007489448 | 0,010776587 |
| lipoic acid synthetase                                                                       | 1,098144586 | 8,760283639 | 7,151770973 | 0,007519057 | 0,010810205 |
| ubiquilin 1                                                                                  | 1,442633092 | 6,639625681 | 7,138856116 | 0,007566614 | 0,010869552 |
| abl-interactor 1                                                                             | 1,01961417  | 6,277617182 | 7,124951476 | 0,007618203 | 0,010934585 |
| bromodomain containing 8                                                                     | 1,193474271 | 5,032516016 | 7,117756747 | 0,007645055 | 0,010958887 |

|                                                                                             |             |             |             |             |             |
|---------------------------------------------------------------------------------------------|-------------|-------------|-------------|-------------|-------------|
| MAD homolog 6 (Drosophila)                                                                  | 1,317336346 | 4,987245043 | 7,117023836 | 0,007647796 | 0,010958887 |
| GIPC PDZ domain containing family, member 1                                                 | 1,063350826 | 6,959527152 | 7,110630345 | 0,007671759 | 0,010984131 |
| phosphoglucomutase 2                                                                        | 1,469024592 | 11,30420027 | 7,107547739 | 0,007683343 | 0,010991626 |
| ring finger protein 125                                                                     | 0,995148848 | 4,806791518 | 7,086391889 | 0,007763389 | 0,011096967 |
| SR-related CTD-associated factor 11                                                         | 1,010649956 | 7,530939247 | 7,083265476 | 0,007775299 | 0,011104821 |
| microtubule-associated protein 6                                                            | 1,191338957 | 4,70372526  | 7,078735901 | 0,007792592 | 0,011120343 |
| protein-L-isospartate (D-aspartate) O-methyltransferase domain containing 1                 | 1,123145097 | 4,708100183 | 7,075998616 | 0,007803063 | 0,011126114 |
| coiled-coil domain containing 55                                                            | 1,15684958  | 8,615819317 | 7,073550655 | 0,007812442 | 0,011130318 |
| myeloid/lymphoid or mixed-lineage leukemia 1                                                | 0,954748742 | 8,778750684 | 7,0680712   | 0,007833481 | 0,011151115 |
| mediator complex subunit 21                                                                 | 1,07866161  | 8,249991027 | 7,042218803 | 0,007933626 | 0,011284394 |
| THUMP domain containing 3                                                                   | 1,267889181 | 7,75217514  | 7,033415608 | 0,007968062 | 0,011324068 |
| CD48 antigen                                                                                | 1,141244305 | 5,352843473 | 7,029030145 | 0,007985281 | 0,011334522 |
| LSM14 homolog B (SCD6, <i>S. cerevisiae</i> )                                               | 1,214974566 | 9,538171651 | 7,028207931 | 0,007988514 | 0,011334522 |
| ubiquitously transcribed tetratricopeptide repeat gene, Y chromosome                        | 1,087992964 | 5,089412025 | 7,019679524 | 0,008022137 | 0,011372906 |
| cytoplasmic FMR1 interacting protein 1                                                      | 1,129961515 | 7,115215623 | 7,012499965 | 0,008050568 | 0,011403873 |
| AT rich interactive domain 5B (MRF1-like)                                                   | 1,202574438 | 6,196535495 | 7,00770651  | 0,008069614 | 0,011413677 |
| ring finger protein 126                                                                     | 1,480313645 | 6,081528556 | 7,007439647 | 0,008070676 | 0,011413677 |
| ring finger protein 113A2                                                                   | 1,156456055 | 9,217132077 | 7,005535235 | 0,008079259 | 0,011415074 |
| stromal interaction molecule 2                                                              | 1,003428355 | 5,083944751 | 6,999395798 | 0,008102759 | 0,01144016  |
| GATA zinc finger domain containing 2B                                                       | 1,134441625 | 5,737948031 | 6,997777871 | 0,00810923  | 0,01144016  |
| choline phosphotransferase 1                                                                | 1,270764461 | 5,921368299 | 6,98900011  | 0,008144439 | 0,011480475 |
| cDNA sequence BC005764                                                                      | 1,01953214  | 4,642450729 | 6,974714424 | 0,008202117 | 0,011552371 |
| Dnaj (Hsp40) homolog, subfamily C, member 12                                                | 1,331242149 | 8,693500625 | 6,971349974 | 0,008215768 | 0,011562191 |
| aspartate-beta-hydroxylase                                                                  | 1,140302122 | 5,029190988 | 6,965724013 | 0,008238655 | 0,011578576 |
| telomeric repeat binding factor 2, interacting protein                                      | 1,048932967 | 8,485658524 | 6,963742932 | 0,008246732 | 0,011578576 |
| cAMP responsive element modulator                                                           | 1,222758454 | 6,29420351  | 6,963560026 | 0,008247478 | 0,011578576 |
| bifunctional apoptosis regulator                                                            | 1,093620196 | 8,038647218 | 6,949487307 | 0,008305118 | 0,011650048 |
| uveal autoantigen with coiled-coil domains and ankyrin repeats                              | 1,263791843 | 7,773212202 | 6,941230393 | 0,008339152 | 0,011688317 |
| COX18 cytochrome c oxidase assembly homolog ( <i>S. cerevisiae</i> )                        | 1,265166569 | 8,42044667  | 6,931466733 | 0,008379603 | 0,011735513 |
| PRP38 pre-mRNA processing factor 38 (yeast) domain containing A                             | 1,12266397  | 5,313002945 | 6,92581115  | 0,008403138 | 0,011758958 |
| sema domain, immunoglobulin domain (Ig), transmembrane domain (TM) and short cytoplasmic dc | 1,339600311 | 12,88028153 | 6,923843268 | 0,008411344 | 0,011760935 |
| integrator complex subunit 5                                                                | 1,166130151 | 7,692587008 | 6,917499904 | 0,008437861 | 0,011788488 |
| golgi membrane protein 1                                                                    | 1,053986688 | 9,23295745  | 6,910320504 | 0,008467987 | 0,011821037 |
| ubiquitin-conjugating enzyme E2Z (putative)                                                 | 1,499561426 | 5,090045974 | 6,893155788 | 0,008540517 | 0,011912679 |
| methionine aminopeptidase 2                                                                 | 1,387496554 | 6,14731817  | 6,889670299 | 0,008555331 | 0,011923735 |
| transportin 1                                                                               | 1,258194521 | 4,734102272 | 6,881520772 | 0,008590085 | 0,011962554 |
| gremlin 2 homolog, cysteine knot superfamily ( <i>Xenopus laevis</i> )                      | 1,19812805  | 4,661567972 | 6,878012418 | 0,008605097 | 0,011973812 |
| RIKEN cDNA 3830406C13 gene                                                                  | 1,304680794 | 5,106283103 | 6,870622154 | 0,008636816 | 0,012008296 |
| TOX high mobility group box family member 3                                                 | 1,319509991 | 6,109406265 | 6,867366964 | 0,00865083  | 0,012018128 |
| phospholipase A2, group XIIA                                                                | 1,241117593 | 8,675292589 | 6,852450932 | 0,00871538  | 0,012098094 |
| N-6 adenine-specific DNA methyltransferase 1 (putative)                                     | 1,403442734 | 4,850827077 | 6,849469303 | 0,008728349 | 0,012106388 |
| 5'-nucleotidase, cytosolic II                                                               | 1,307237087 | 5,952500651 | 6,842897308 | 0,008757014 | 0,012136422 |
| glutathione peroxidase 4                                                                    | 1,024653658 | 10,56011847 | 6,831817893 | 0,008805583 | 0,012193971 |
| kelch-like ECH-associated protein 1                                                         | 1,304458875 | 7,35325223  | 6,826320705 | 0,008829796 | 0,012217727 |
| NSFL1 (p97) cofactor (p47)                                                                  | 1,062350078 | 9,04370853  | 6,822632278 | 0,008846085 | 0,012230489 |
| prohibitin 2                                                                                | 1,118103264 | 9,738708634 | 6,816052332 | 0,008875228 | 0,012253929 |
| RIKEN cDNA 2900073G15 gene                                                                  | 1,366704388 | 7,939729682 | 6,815608951 | 0,008877196 | 0,012253929 |
| tRNA methyltransferase 11-2 homolog ( <i>S. cerevisiae</i> )                                | 1,06036947  | 5,96002168  | 6,812106523 | 0,008892758 | 0,012265629 |
| RIKEN cDNA 3830406C13 gene                                                                  | 1,463696057 | 7,122009322 | 6,808573589 | 0,008908487 | 0,012277541 |
| cold shock domain containing E1, RNA binding                                                | 1,447239235 | 9,630010273 | 6,802247722 | 0,008935704 | 0,012305253 |
| F-box protein 4                                                                             | 1,401107091 | 4,992638666 | 6,7972935   | 0,008958921 | 0,012327419 |
| RAB3A, member RAS oncogene family                                                           | 1,071318601 | 4,87330542  | 6,794906358 | 0,008969636 | 0,012328823 |
| RIKEN cDNA 1110034A24 gene                                                                  | 0,954452843 | 5,502325205 | 6,79389359  | 0,008974187 | 0,012328823 |
| integrin alpha 2b                                                                           | 0,995638914 | 4,60824654  | 6,778790829 | 0,009042359 | 0,012412627 |
| plexin D1                                                                                   | 0,998123251 | 6,843620998 | 6,775863085 | 0,009055643 | 0,012414004 |
| sorting nexin 1                                                                             | 1,346976223 | 7,911570589 | 6,77540909  | 0,009057705 | 0,012414004 |
| protein phosphatase 1M                                                                      | 1,090297739 | 9,374719134 | 6,770904556 | 0,009078193 | 0,01243224  |
| F-box protein 31                                                                            | 1,434825867 | 6,454199692 | 6,752933317 | 0,00916046  | 0,012534986 |
| polymerase (RNA) II (DNA directed) polypeptide D                                            | 1,097411353 | 7,101349252 | 6,750671226 | 0,009170876 | 0,012539326 |
| homeobox B4                                                                                 | 1,331373944 | 5,552288319 | 6,744807882 | 0,009197937 | 0,01256543  |
| zinc finger (CCCH type), RNA binding motif and serine/arginine rich 2                       | 1,237839625 | 6,885893054 | 6,743391925 | 0,009204486 | 0,01256543  |
| suppressor of cytokine signaling 1                                                          | 1,02387043  | 5,202359893 | 6,732254133 | 0,009256184 | 0,012626048 |
| ring finger protein 14                                                                      | 1,112974576 | 10,02692217 | 6,725209792 | 0,009289054 | 0,012660908 |
| mitochondrial ribosomal protein S33                                                         | 1,137945937 | 10,15397227 | 6,723572957 | 0,009296711 | 0,012661374 |
| DNA segment, Chr 14, Abbott 1 expressed                                                     | 1,153013432 | 6,593885004 | 6,718928448 | 0,009318477 | 0,01268104  |
| NADH dehydrogenase (ubiquinone) 1, alpha/beta subcomplex, 1                                 | 1,306147587 | 5,168411055 | 6,712923851 | 0,009346703 | 0,01270946  |
| myotubularin related protein 12                                                             | 1,232855361 | 8,664435284 | 6,707705585 | 0,009371312 | 0,012732921 |
| ATPase, Ca++ transporting, ubiquitous                                                       | 0,977664848 | 6,817659059 | 6,704298777 | 0,009387419 | 0,012744802 |
| inhibitor of kappaB kinase epsilon                                                          | 1,204414078 | 7,325929399 | 6,701748479 | 0,009399497 | 0,012745667 |
| dynammin 1-like                                                                             | 1,343030964 | 7,300262168 | 6,701055316 | 0,009402783 | 0,012745667 |
| histidine triad nucleotide binding protein 3                                                | 1,181618075 | 9,08920756  | 6,695329408 | 0,009429976 | 0,012772526 |
| RIKEN cDNA 2310008H04 gene                                                                  | 1,288796707 | 7,943240286 | 6,688592497 | 0,009462087 | 0,012805998 |
| apoptotic peptidase activating factor 1                                                     | 1,150387012 | 7,215861995 | 6,683513095 | 0,00948638  | 0,012828846 |
| ubiquitin specific peptidase 37                                                             | 1,4882777   | 6,574891988 | 6,680694569 | 0,00949989  | 0,01283284  |
| pseudouridylate synthase 10                                                                 | 1,388668604 | 6,622264497 | 6,679804919 | 0,00950416  | 0,01283284  |
| UDP-Gal:betaGlcNAc beta 1,4- galactosyltransferase, polypeptide 1                           | 1,161139196 | 7,958464607 | 6,675785812 | 0,009523474 | 0,012840275 |
| lymphotoxin A                                                                               | 1,168174339 | 4,831165711 | 6,675572064 | 0,009524502 | 0,012840275 |
| family with sequence similarity 162, member A                                               | 1,369892545 | 8,700212526 | 6,672284153 | 0,009540338 | 0,012851615 |
| N-acetyltransferase 2 (arylamine N-acetyltransferase)                                       | 1,123098076 | 7,034334718 | 6,668769147 | 0,009557301 | 0,012864454 |
| centromere protein W                                                                        | 1,225478946 | 7,42987471  | 6,656888457 | 0,009614892 | 0,012931918 |
| synovial sarcoma translocation, Chromosome 18                                               | 1,234637653 | 7,661834093 | 6,655047257 | 0,009623853 | 0,01293392  |

|                                                                                     |             |             |             |             |             |
|-------------------------------------------------------------------------------------|-------------|-------------|-------------|-------------|-------------|
| cardiotrophin-like cytokine factor 1                                                | 1,069688075 | 4,899549844 | 6,65172172  | 0,009640062 | 0,012941094 |
| histone cluster 2, H2aa1                                                            | 1,089348482 | 8,709451036 | 6,650885337 | 0,009644143 | 0,012941094 |
| Dnaj (Hsp40) homolog, subfamily C, member 21                                        | 1,119657155 | 8,900482907 | 6,645384576 | 0,009671036 | 0,012967129 |
| pre-B-cell leukemia transcription factor interacting protein 1                      | 1,167377258 | 11,9045904  | 6,643441127 | 0,009680558 | 0,01296985  |
| zinc finger protein 281                                                             | 1,004341912 | 6,487087421 | 6,641206716 | 0,009691519 | 0,012974493 |
| phosphatidylinositol 3-kinase, catalytic, alpha polypeptide                         | 1,48876377  | 5,716158577 | 6,639495279 | 0,009699924 | 0,01297571  |
| guanine nucleotide binding protein-like 3 (nucleolar)                               | 1,417299955 | 5,196301428 | 6,633018032 | 0,00973181  | 0,013008311 |
| zinc finger protein 281                                                             | 1,11837891  | 7,207061496 | 6,631017774 | 0,009741681 | 0,013011458 |
| ubiquitin-like, containing PHD and RING finger domains 2                            | 1,156869796 | 6,456862063 | 6,623178685 | 0,009780477 | 0,013053205 |
| CLIP associating protein 1                                                          | 1,240475034 | 4,775562627 | 6,619474089 | 0,009798873 | 0,013067681 |
| adenosine deaminase, RNA-specific, B1                                               | 1,079267315 | 4,965066003 | 6,617523435 | 0,009808576 | 0,01307055  |
| coenzyme Q2 homolog, prenyltransferase (yeast)                                      | 1,050948538 | 5,159136188 | 6,608924464 | 0,009851477 | 0,013110422 |
| sperm antigen with calponin homology and coiled-coil domains 1-like                 | 1,109740557 | 11,3425646  | 6,60849117  | 0,009853645 | 0,013110422 |
| cAMP responsive element modulator                                                   | 1,348545646 | 7,732221666 | 6,59765579  | 0,009908025 | 0,013172651 |
| phosphoglycerate mutase 1                                                           | 1,313441617 | 8,844740076 | 6,595046726 | 0,00992117  | 0,01317747  |
| transforming growth factor beta regulated gene 1                                    | 1,161782354 | 10,01711772 | 6,593915723 | 0,009926875 | 0,01317747  |
| atlastin GTPase 3                                                                   | 1,173777132 | 7,26128224  | 6,579238311 | 0,010001249 | 0,013266025 |
| trimethylguanosine synthase homolog (S. cerevisiae)                                 | 1,040850832 | 4,870341657 | 6,568676284 | 0,010055165 | 0,013327328 |
| kelch-like ECH-associated protein 1                                                 | 1,213683116 | 9,317976383 | 6,5655005   | 0,010071441 | 0,013331556 |
| neuropilin 2                                                                        | 1,76857874  | 6,14451592  | 6,565048978 | 0,010073758 | 0,013331556 |
| RIKEN cDNA B230219D22 gene                                                          | 1,223351207 | 8,443471913 | 6,54575156  | 0,010173339 | 0,013453056 |
| protein O-glucosyltransferase 1                                                     | 1,118706689 | 11,65683097 | 6,541381381 | 0,010196047 | 0,013472792 |
| histocompatibility 2, class II antigen A, alpha                                     | 1,121259324 | 12,28825317 | 6,530511252 | 0,010252782 | 0,013537427 |
| atlastin GTPase 3                                                                   | 1,29365962  | 7,93148343  | 6,516692138 | 0,010325433 | 0,013621091 |
| phosphodiesterase 6D, cGMP-specific, rod, delta                                     | 1,196530238 | 6,281507607 | 6,515470344 | 0,010331884 | 0,013621091 |
| brain and reproductive organ-expressed protein                                      | 1,261150085 | 7,474979117 | 6,505981381 | 0,010382325 | 0,013699302 |
| zinc finger, DHHC domain containing 5                                               | 0,999940707 | 6,333800328 | 6,505586248 | 0,010384247 | 0,013669302 |
| coiled-coil domain containing 91                                                    | 1,364582706 | 6,642093026 | 6,499325981 | 0,010411757 | 0,013693378 |
| Janus kinase 3                                                                      | 1,209919821 | 4,834398707 | 6,499177984 | 0,010418359 | 0,013693378 |
| src homology 2 domain-containing transforming protein D                             | 1,120919876 | 5,117845261 | 6,494687497 | 0,01042339  | 0,013714483 |
| dynamin 1-like                                                                      | 1,207092186 | 10,10413567 | 6,489641961 | 0,010469358 | 0,013739544 |
| peroxisomal biogenesis factor 19                                                    | 1,227259018 | 9,585307604 | 6,485751067 | 0,010490249 | 0,013756531 |
| chromobox homolog 3 (Drosophila HP1 gamma)                                          | 1,13829877  | 6,408623251 | 6,483315833 | 0,010503348 | 0,013763282 |
| transmembrane protein 85                                                            | 1,343494772 | 10,08766903 | 6,480834769 | 0,010516713 | 0,013770371 |
| zinc finger, MYND-type containing 8                                                 | 1,058238977 | 5,863373722 | 6,478112809 | 0,010531399 | 0,01377067  |
| small nuclear ribonucleoprotein D3                                                  | 1,282650135 | 11,10573659 | 6,477843723 | 0,010532852 | 0,01377067  |
| enhancer of polycomb homolog 2 (Drosophila)                                         | 1,123061996 | 8,038857603 | 6,471211456 | 0,010568738 | 0,013801213 |
| non-SMC element 2 homolog (MMS21, S. cerevisiae)                                    | 1,283284685 | 4,846247541 | 6,470580504 | 0,01057216  | 0,013801213 |
| ring finger protein 34                                                              | 1,393596077 | 5,353044921 | 6,464487744 | 0,010605263 | 0,01383371  |
| TBC1D12: TBC1 domain family, member 12                                              | 1,018183641 | 4,621107366 | 6,463059992 | 0,010613037 | 0,01383371  |
| glycerophosphodiester phosphodiesterase 1                                           | 1,194893077 | 9,153306938 | 6,455348508 | 0,010655141 | 0,013876772 |
| inositol monophosphatase domain containing 1                                        | 1,259962277 | 5,845970839 | 6,454076039 | 0,010662107 | 0,013876772 |
| serologically defined colon cancer antigen 3                                        | 1,058752997 | 6,18986473  | 6,448422049 | 0,010693122 | 0,013905681 |
| chloride channel 3                                                                  | 1,473963876 | 5,939746218 | 6,447100629 | 0,010700386 | 0,013905681 |
| Dnaj (Hsp40) homolog, subfamily B, member 6                                         | 1,251124033 | 5,454344304 | 6,444265407 | 0,010715989 | 0,013915512 |
| aldolase 1 A retrogene 2                                                            | 0,975195872 | 4,608320979 | 6,44191438  | 0,010728948 | 0,013921896 |
| cyclin D-type binding-protein 1                                                     | 1,113686213 | 8,077956542 | 6,420454303 | 0,01084807  | 0,014065924 |
| pleckstrin homology-like domain, family B, member 1                                 | 1,376629904 | 6,213182039 | 6,412646514 | 0,010891785 | 0,014110337 |
| toll-interleukin 1 receptor (TIR) domain-containing adaptor protein                 | 1,192717496 | 5,079846482 | 6,411428122 | 0,010898625 | 0,014110337 |
| coenzyme Q2 homolog, prenyltransferase (yeast)                                      | 1,104737193 | 8,198490903 | 6,407240141 | 0,010922174 | 0,014130256 |
| amyloid beta (A4) precursor protein-binding, family B, member 3                     | 1,115861024 | 4,953556619 | 6,404662761 | 0,010936695 | 0,014138476 |
| p21 protein (Cdc42/Rac)-activated kinase 2                                          | 1,272083659 | 7,465764076 | 6,395159821 | 0,010990428 | 0,014197336 |
| suppression of tumorigenicity 7                                                     | 1,102109234 | 4,713423324 | 6,386937479 | 0,011037164 | 0,014247077 |
| CD34 antigen                                                                        | 1,133967859 | 4,762504059 | 6,381863161 | 0,01106612  | 0,01427381  |
| predicted gene 561                                                                  | 1,253524819 | 7,72493792  | 6,379045634 | 0,011082235 | 0,014283953 |
| interleukin 31 receptor A                                                           | 1,2559004   | 4,84720106  | 6,376128031 | 0,011098952 | 0,014290826 |
| PHD finger protein 6                                                                | 1,248024506 | 7,110786529 | 6,375234095 | 0,011104079 | 0,014290826 |
| cDNA sequence BCO16423                                                              | 1,212379194 | 5,302056633 | 6,369000108 | 0,011139913 | 0,014326292 |
| ubiquitin specific peptidase 25                                                     | 1,243669647 | 4,905023255 | 6,366258336 | 0,011155715 | 0,014335963 |
| Cbp/p300-interacting transactivator, with Glu/Asp-rich carboxy-terminal domain, 2   | 1,093324588 | 9,896497957 | 6,357150594 | 0,011208392 | 0,014377774 |
| tetratricopeptide repeat, ankyrin repeat and coiled-coil containing 1               | 1,583881462 | 5,200144588 | 6,3565339   | 0,011211969 | 0,014377774 |
| transmembrane protein 109                                                           | 1,117752627 | 10,75797546 | 6,356327099 | 0,011213168 | 0,014377774 |
| dynein light chain LC8-type 1                                                       | 1,319478655 | 8,459964783 | 6,340003131 | 0,011308343 | 0,014489077 |
| IK cytokine                                                                         | 0,985595944 | 9,910040058 | 6,333056741 | 0,011349124 | 0,014530573 |
| Abelson helper integration site 1                                                   | 1,276833131 | 5,608326385 | 6,327433618 | 0,01138226  | 0,014562226 |
| zinc finger protein 207                                                             | 1,184174825 | 8,846150989 | 6,314599719 | 0,011458304 | 0,014641644 |
| coatamer protein complex, subunit epsilon                                           | 1,345181005 | 9,06595515  | 6,314104057 | 0,011461252 | 0,014641644 |
| guanosine diphosphate (GDP) dissociation inhibitor 1                                | 1,288012477 | 9,359565395 | 6,306622739 | 0,011505863 | 0,014683254 |
| GTP binding protein 4                                                               | 1,272420512 | 11,2004017  | 6,305400256 | 0,011513171 | 0,014683254 |
| syndecan 1                                                                          | 0,987030266 | 6,156824059 | 6,304380508 | 0,011519271 | 0,014683254 |
| thymoma viral proto-oncogene 3                                                      | 1,369896504 | 6,628665418 | 6,299133697 | 0,011550718 | 0,014712504 |
| coiled-coil domain containing 111                                                   | 1,090847666 | 6,892168909 | 6,288732501 | 0,01161335  | 0,014781403 |
| integrin alpha 5 (fibronectin receptor alpha)                                       | 1,303046424 | 5,666961486 | 6,287140617 | 0,01162297  | 0,014782778 |
| ADP-ribosylation factor guanine nucleotide-exchange factor 1(brefeldin A-inhibited) | 1,260623362 | 9,646180152 | 6,266562324 | 0,011748153 | 0,014931023 |
| LSM3 homolog, U6 small nuclear RNA associated (S. cerevisiae)                       | 1,268784354 | 9,353926125 | 6,250951977 | 0,011844147 | 0,01504145  |
| PDZ and LIM domain 5                                                                | 1,275849856 | 6,208686218 | 6,249613503 | 0,011852419 | 0,01504145  |
| TATA box binding protein (Tbp)-associated factor, RNA polymerase I, D               | 1,260917164 | 7,374459024 | 6,238248734 | 0,011922927 | 0,015119844 |
| proteasome (prosome, macropain) subunit, beta type 5                                | 1,108190741 | 9,986681531 | 6,235430435 | 0,011940487 | 0,015131027 |
| lysozyme-like 4                                                                     | 0,977377902 | 5,667606153 | 6,233822623 | 0,011950518 | 0,015132666 |
| RCC1 domain containing 1                                                            | 1,133370066 | 4,716618563 | 6,230720329 | 0,011969899 | 0,015141494 |
| asparagine synthetase                                                               | 1,076562969 | 4,668733107 | 6,229906683 | 0,011974989 | 0,015141494 |

|                                                                                                         |             |             |             |             |             |
|---------------------------------------------------------------------------------------------------------|-------------|-------------|-------------|-------------|-------------|
| solute carrier family 33 (acetyl-CoA transporter), member 1                                             | 1,148260062 | 4,965910326 | 6,223716784 | 0,012013787 | 0,015179464 |
| eukaryotic translation initiation factor 6                                                              | 1,166982496 | 11,52759956 | 6,204232832 | 0,012136858 | 0,015323779 |
| NHL repeat containing 2                                                                                 | 1,27367541  | 7,883484975 | 6,19683695  | 0,012183952 | 0,015368979 |
| cyclin-dependent kinase 5, regulatory subunit 1 (p35)                                                   | 1,398649862 | 5,313018964 | 6,195824568 | 0,012190415 | 0,015368979 |
| RAB GTPase activating protein 1                                                                         | 1,112932375 | 4,993530069 | 6,193531797 | 0,012205066 | 0,015376251 |
| interleukin 1 receptor antagonist                                                                       | 1,012414183 | 4,839645757 | 6,188319124 | 0,01223845  | 0,015407096 |
| dynactin 4                                                                                              | 1,25405583  | 8,345720775 | 6,186650534 | 0,012249159 | 0,01540937  |
| olfactory receptor 458                                                                                  | 1,361001488 | 4,859839366 | 6,181623114 | 0,012281488 | 0,015428796 |
| solute carrier family 1 (glutamate/neutral amino acid transporter), member 4                            | 1,001203    | 5,166897998 | 6,181329201 | 0,012283383 | 0,015428796 |
| protein phosphatase 1B, magnesium dependent, beta isoform                                               | 1,163848945 | 10,21828012 | 6,180094132 | 0,01229134  | 0,015428796 |
| hypothetical LOC100503849                                                                               | 1,28352611  | 5,289346182 | 6,177163398 | 0,012310249 | 0,015441334 |
| carboxypeptidase D                                                                                      | 1,420049078 | 5,079033073 | 6,172435951 | 0,012340821 | 0,015468473 |
| aminoacyl tRNA synthetase complex-interacting multifunctional protein 2                                 | 0,995034314 | 6,539151281 | 6,170724451 | 0,012351911 | 0,01547117  |
| fibronectin type III domain containing 3B                                                               | 1,139918716 | 7,984683889 | 6,166340202 | 0,01238037  | 0,015489755 |
| transmembrane protein 219                                                                               | 1,32029942  | 5,314940997 | 6,165682616 | 0,012384645 | 0,015489755 |
| pyruvate dehydrogenase (lipoamide) beta                                                                 | 1,360191097 | 6,045473707 | 6,163704869 | 0,012397513 | 0,015494654 |
| RIKEN cDNA 1810013L24 gene                                                                              | 1,272402011 | 8,085492981 | 6,161546187 | 0,012411576 | 0,015501037 |
| ubiquitin-conjugating enzyme E2K (UBC1 homolog, yeast)                                                  | 1,241288243 | 4,77550832  | 6,158307639 | 0,012432708 | 0,015526234 |
| CD74 antigen (invariant polypeptide of major histocompatibility complex, class II antigen-associated    | 0,994540504 | 14,56839775 | 6,151994733 | 0,012474018 | 0,015556575 |
| protein arginine N-methyltransferase 2                                                                  | 1,170128376 | 9,781935971 | 6,148668875 | 0,012495845 | 0,015572576 |
| cleavage and polyadenylation specific factor 6                                                          | 1,359083228 | 5,851721568 | 6,147180313 | 0,012505629 | 0,015573557 |
| zinc finger, MYND-type containing 8                                                                     | 1,14665664  | 10,34536582 | 6,140115525 | 0,01252182  | 0,015620292 |
| DNL-type zinc finger                                                                                    | 1,170900333 | 5,690299864 | 6,136876824 | 0,012573589 | 0,015635247 |
| progesterone receptor membrane component 2                                                              | 1,210040888 | 4,895612962 | 6,134218278 | 0,012591193 | 0,015635247 |
| schlafen 10, pseudogene                                                                                 | 1,020141558 | 4,628447381 | 6,132350261 | 0,012603579 | 0,015635247 |
| RWD domain containing 1                                                                                 | 1,190394109 | 6,705940042 | 6,132259107 | 0,012604184 | 0,015635247 |
| R3H domain containing 2                                                                                 | 1,070128696 | 7,028749839 | 6,131478983 | 0,012609361 | 0,015635247 |
| histone aminotransferase 1                                                                              | 1,274363749 | 11,9138962  | 6,121161185 | 0,012678064 | 0,015709183 |
| fucose-1-phosphate guanylyltransferase                                                                  | 1,000020362 | 7,001150905 | 6,113192832 | 0,012731416 | 0,015764007 |
| complement component 2 (within H-2S)                                                                    | 1,207352719 | 4,717292981 | 6,095835953 | 0,012848524 | 0,015897637 |
| heat shock protein 90, alpha (cytosolic), class A member 1                                              | 1,250852897 | 5,32323336  | 6,093432098 | 0,01286484  | 0,015899718 |
| ring finger protein 146                                                                                 | 1,37197141  | 5,337243473 | 6,092882121 | 0,012868576 | 0,015899718 |
| TAF6 RNA polymerase II, TATA box binding protein (TBP)-associated factor                                | 1,205191738 | 6,478054424 | 6,086269108 | 0,012913599 | 0,015943966 |
| ras homolog gene family, member G                                                                       | 1,07595948  | 10,58296217 | 6,079934054 | 0,012956899 | 0,015986025 |
| non-catalytic region of tyrosine kinase adaptor protein 2                                               | 1,149705104 | 9,993365583 | 6,078550108 | 0,012966381 | 0,015986329 |
| family with sequence similarity 129, member A                                                           | 1,282604728 | 8,666516924 | 6,072675932 | 0,013006714 | 0,016024642 |
| nudix (nucleoside diphosphate linked moiety X)-type motif 18                                            | 1,040119017 | 9,627620717 | 6,053813413 | 0,013137202 | 0,016173895 |
| peptidylprolyl isomerase (cyclophilin)-like 2                                                           | 1,110210172 | 6,278301485 | 6,049724635 | 0,013165685 | 0,016197442 |
| nuclear factor of kappa light polypeptide gene enhancer in B-cells inhibitor, epsilon                   | 1,155518806 | 5,921210447 | 6,047864952 | 0,013178664 | 0,016201894 |
| protein tyrosine phosphatase, receptor type, f polypeptide (PTPRF), interacting protein (liprin), alpha | 1,227620485 | 8,72750547  | 6,046382021 | 0,013189023 | 0,016203122 |
| tubulin, alpha 1A                                                                                       | 1,421750281 | 10,30460386 | 6,044682275 | 0,013200909 | 0,016206222 |
| RIKEN cDNA 0610007P14 gene                                                                              | 1,100847605 | 8,522915916 | 6,041649576 | 0,013222146 | 0,01622079  |
| adrenergic receptor, beta 2                                                                             | 1,404798344 | 5,33722708  | 6,035505378 | 0,013265292 | 0,016256281 |
| leucine rich repeat containing 8 family, member C                                                       | 1,205737397 | 6,806958071 | 6,033535129 | 0,013279162 | 0,016256281 |
| 5'-3' exoribonuclease 2                                                                                 | 1,297452135 | 5,64019643  | 6,033522621 | 0,01327925  | 0,016256281 |
| ubiquilin 1                                                                                             | 0,99405636  | 6,022937481 | 6,022501911 | 0,01335714  | 0,01633602  |
| ring finger protein 182                                                                                 | 1,219435936 | 5,107636664 | 6,021638951 | 0,013363261 | 0,01633602  |
| predicted gene 14492                                                                                    | 1,191761279 | 4,635135601 | 6,017450149 | 0,013393018 | 0,016358222 |
| zinc finger protein 598                                                                                 | 1,366373575 | 5,288109986 | 6,016423607 | 0,013400322 | 0,016358222 |
| interferon induced with helicase C domain 1                                                             | 1,204678254 | 4,718445391 | 6,009810319 | 0,013447488 | 0,016404229 |
| histidine triad nucleotide binding protein 2                                                            | 1,009379503 | 9,610260541 | 6,007040085 | 0,013467302 | 0,016412009 |
| RIKEN cDNA 1190005F20 gene                                                                              | 1,035964664 | 9,246758772 | 6,006268334 | 0,013472827 | 0,016412009 |
| transmembrane BAX inhibitor motif containing 4                                                          | 1,246267874 | 12,16205332 | 6,004708582 | 0,013484003 | 0,016414071 |
| TGFB-induced factor homeobox 1                                                                          | 1,21121141  | 5,802303484 | 6,001343121 | 0,013508154 | 0,016425256 |
| tetratricopeptide repeat domain 9C                                                                      | 1,143798406 | 7,393720023 | 6,000784265 | 0,013512169 | 0,016425256 |
| mortality factor 4 like 1                                                                               | 1,114579218 | 11,60607998 | 5,989225346 | 0,013595522 | 0,016504622 |
| inhibitor of kappaB kinase beta                                                                         | 1,18700735  | 8,546559282 | 5,989086226 | 0,013596528 | 0,016504622 |
| kinesin light chain 2                                                                                   | 1,157496604 | 4,840344217 | 5,986847391 | 0,013612742 | 0,016512724 |
| heparan sulfate (glucosamine) 3-O-sulfotransferase 3B1                                                  | 1,012744021 | 6,119650317 | 5,97463089  | 0,013701608 | 0,016608882 |
| CCR4-NOT transcription complex, subunit 6-like                                                          | 1,268621656 | 5,469028633 | 5,969165349 | 0,01374158  | 0,016645679 |
| RIKEN cDNA 1700081L11 gene                                                                              | 1,08732729  | 4,654079761 | 5,966107719 | 0,013764001 | 0,016655918 |
| musculin                                                                                                | 1,362680959 | 4,757617146 | 5,965389047 | 0,013769277 | 0,016655918 |
| enoyl-Coenzyme A delta isomerase 2                                                                      | 1,415237165 | 8,135613547 | 5,959189473 | 0,013814885 | 0,016699418 |
| solute carrier family 25, member 38                                                                     | 1,119879664 | 6,577806155 | 5,956046011 | 0,013838077 | 0,016710732 |
| glutaredoxin 2 (thioltransferase)                                                                       | 1,130518187 | 4,571492104 | 5,95304644  | 0,013843553 | 0,016710732 |
| RIKEN cDNA 1110059E24 gene                                                                              | 1,122014528 | 7,691694395 | 5,950965699 | 0,013875653 | 0,016737808 |
| churchill domain containing 1                                                                           | 1,287284448 | 8,300790547 | 5,946482597 | 0,013908908 | 0,01676624  |
| adrenergic receptor kinase, beta 1                                                                      | 1,130663877 | 5,461838603 | 5,940887934 | 0,013950538 | 0,016804719 |
| RAD23a homolog (S. cerevisiae)                                                                          | 1,321889495 | 6,24575781  | 5,921025764 | 0,014099489 | 0,016972334 |
| syntaxin binding protein 4                                                                              | 1,068365091 | 4,989237409 | 5,917973506 | 0,01412254  | 0,016988268 |
| minichromosome maintenance deficient 6 (MIS5 homolog, S. pombe) (S. cerevisiae)                         | 1,023652263 | 7,443273956 | 5,91171921  | 0,014169908 | 0,017033411 |
| syntaxin 8                                                                                              | 1,094098625 | 10,18229771 | 5,907481205 | 0,014202109 | 0,017060272 |
| chromodomain helicase DNA binding protein 1                                                             | 1,156688023 | 6,964101721 | 5,906306273 | 0,014213107 | 0,017061643 |
| bromodomain containing 3                                                                                | 1,030520885 | 7,873382889 | 5,904518904 | 0,014224667 | 0,017063686 |
| leprecan 1                                                                                              | 1,069850714 | 5,394099799 | 5,90125643  | 0,014249558 | 0,017078798 |
| family with sequence similarity 76, member A                                                            | 1,183491613 | 7,813044064 | 5,90028264  | 0,014256998 | 0,017078798 |
| transmembrane protein 63b                                                                               | 1,284674533 | 7,774029221 | 5,896850929 | 0,01428325  | 0,017098413 |
| THO complex 7 homolog (Drosophila)                                                                      | 1,206527932 | 6,848877615 | 5,893821036 | 0,014306474 | 0,017103715 |
| ATPase, Ca++-sequestering                                                                               | 1,182724153 | 5,884238966 | 5,893334168 | 0,01431021  | 0,017103715 |
| mitochondrial ribosomal protein S11                                                                     | 1,074356936 | 8,123196832 | 5,891439448 | 0,014324759 | 0,017103715 |
| AE binding protein 2                                                                                    | 1,083120225 | 11,34911336 | 5,890939122 | 0,014328604 | 0,017103715 |

|                                                                                                |             |             |             |             |             |
|------------------------------------------------------------------------------------------------|-------------|-------------|-------------|-------------|-------------|
| F-box protein 38                                                                               | 1,17743883  | 8,243204984 | 5,889836363 | 0,014337083 | 0,017103715 |
| cardiolipin synthase 1                                                                         | 1,391492169 | 5,444134262 | 5,882915746 | 0,014390423 | 0,017155524 |
| BCL2-like 1                                                                                    | 1,359187878 | 5,615737391 | 5,876011605 | 0,014443862 | 0,017207382 |
| 5',3'-nucleotidase, cytosolic                                                                  | 1,184672119 | 10,66384056 | 5,866322293 | 0,014519244 | 0,017278522 |
| dihydroipoamide branched chain transacylase E2                                                 | 1,12432777  | 6,918130271 | 5,865771725 | 0,014523541 | 0,017278522 |
| trinucleotide repeat containing 6a                                                             | 1,17738716  | 8,341610895 | 5,862338272 | 0,014550371 | 0,017298552 |
| mitochondrial ribosomal protein L53                                                            | 1,129622359 | 8,972591347 | 5,8602482   | 0,01456673  | 0,017306116 |
| son of sevenless homolog 2 (Drosophila)                                                        | 0,997878815 | 6,459073819 | 5,857790616 | 0,014585994 | 0,017317116 |
| zinc finger and BTB domain containing 8 opposite strand expressed sequence AI427809            | 1,203669831 | 9,443914769 | 5,83685066  | 0,014751319 | 0,017501394 |
| heat shock protein 90 alpha (cytosolic), class B member 1                                      | 1,390519096 | 8,640832802 | 5,820925538 | 0,014878491 | 0,017628109 |
| TRAF family member-associated Nf-kappa B activator                                             | 1,239967161 | 8,030010823 | 5,819044599 | 0,014893594 | 0,017633934 |
| trans-acting transcription factor 1                                                            | 1,160025676 | 5,673315965 | 5,807452581 | 0,014987063 | 0,017732471 |
| amyloid beta (A4) precursor protein-binding, family B, member 2                                | 1,102562711 | 6,629031373 | 5,800438335 | 0,015403946 | 0,017796681 |
| importin 9                                                                                     | 1,061007296 | 7,675082661 | 5,800000488 | 0,015047505 | 0,017779681 |
| casein kinase 1, gamma 3                                                                       | 1,213214007 | 7,663440563 | 5,798228137 | 0,015061922 | 0,017784575 |
| dachshund 1 (Drosophila)                                                                       | 1,079433071 | 4,670392748 | 5,791703181 | 0,015115133 | 0,017835239 |
| cardiotrophin-like cytokine factor 1                                                           | 1,299057237 | 4,969502435 | 5,77737071  | 0,015229753 | 0,017958244 |
| ankyrin repeat and SOCS box-containing 1                                                       | 1,219541311 | 5,574112275 | 5,774385726 | 0,015257405 | 0,017978603 |
| calyculin binding protein                                                                      | 1,313826856 | 5,776898322 | 5,76382033  | 0,01534496  | 0,018069473 |
| glucoside xylosyltransferase 1                                                                 | 1,152291926 | 5,21686114  | 5,756978994 | 0,01540196  | 0,018124265 |
| chromodomain protein, Y chromosome-like                                                        | 1,159263131 | 5,603574933 | 5,751219546 | 0,015450135 | 0,018168604 |
| microtubule-associated protein 1 light chain 3 beta                                            | 1,087622706 | 7,80866239  | 5,74918738  | 0,015467175 | 0,018176293 |
| v-ral simian leukemia viral oncogene homolog B (ras related)                                   | 1,109953545 | 8,761039426 | 5,746880278 | 0,015486546 | 0,01818671  |
| ubiquitin-like domain containing CTD phosphatase 1                                             | 1,218776468 | 7,830896365 | 5,727403893 | 0,015651185 | 0,018359985 |
| Prkr interacting protein 1 (IL11 inducible)                                                    | 1,048723482 | 8,172542023 | 5,800416541 | 0,015621279 | 0,018359985 |
| neutrophil cytosolic factor 4                                                                  | 1,045136281 | 10,98620701 | 5,72567293  | 0,015665914 | 0,018359985 |
| Kruppel-like factor 6                                                                          | 1,210827805 | 6,938926291 | 5,724077382 | 0,015679505 | 0,018363448 |
| engulfment and cell motility 1, ced-12 homolog (C. elegans)                                    | 1,044664266 | 5,227675883 | 5,714732548 | 0,015759378 | 0,018444545 |
| guanine nucleotide binding protein (G protein), gamma 12                                       | 1,31229913  | 11,14261526 | 5,712885416 | 0,01577522  | 0,018450613 |
| Sec61 beta subunit                                                                             | 1,188336025 | 10,5454578  | 5,700944417 | 0,015878081 | 0,018558378 |
| transmembrane and coiled-coil domains 3                                                        | 1,274960918 | 6,459492596 | 5,694886263 | 0,01593056  | 0,018607152 |
| rcd1 (required for cell differentiation) homolog 1 (S. pombe)                                  | 1,264999784 | 6,156435498 | 5,692131122 | 0,015954493 | 0,018615153 |
| host cell factor C2                                                                            | 1,041432411 | 5,008662773 | 5,690416541 | 0,015969407 | 0,018615153 |
| TGFB-induced factor homeobox 1                                                                 | 1,14460531  | 9,094597843 | 5,690386083 | 0,015969672 | 0,018615153 |
| zinc finger protein 292                                                                        | 1,206931444 | 6,037029856 | 5,686862355 | 0,016000374 | 0,018638339 |
| autophagy-related 10 (yeast)                                                                   | 1,267566858 | 5,944329017 | 5,677523256 | 0,016082074 | 0,018719624 |
| jumonji domain containing 6                                                                    | 1,044128305 | 10,65606909 | 5,676421981 | 0,01609174  | 0,018719624 |
| processing of precursor 5, ribonuclease P/MRP family (S. cerevisiae)                           | 1,154022129 | 9,864302851 | 5,673594561 | 0,016116586 | 0,018735937 |
| paired-Ig-like receptor A6                                                                     | 1,053947776 | 5,435512838 | 5,661792534 | 0,016220772 | 0,018844401 |
| alcohol dehydrogenase, iron containing, 1                                                      | 1,321070521 | 4,996028689 | 5,660401914 | 0,016233099 | 0,018846073 |
| MTERF domain containing 2                                                                      | 1,313604047 | 6,75175719  | 5,657179643 | 0,016261704 | 0,018858339 |
| hydroxyacyl-Coenzyme A dehydrogenase/3-ketoacyl-Coenzyme A thiolase/enoyl-Coenzyme A hydratase | 1,169767185 | 8,773416922 | 5,656475362 | 0,016267964 | 0,018858339 |
| mitochondrial ribosomal protein S10                                                            | 1,146785284 | 7,25791804  | 5,65532531  | 0,016276348 | 0,018858339 |
| nuclear receptor-binding SET-domain protein 1                                                  | 1,147428699 | 5,905007159 | 5,643757709 | 0,016381477 | 0,018967449 |
| syntaxin 11                                                                                    | 1,068208446 | 7,71171236  | 5,639127018 | 0,016423034 | 0,018995723 |
| chromatin modifying protein 4B                                                                 | 1,06002055  | 9,253760136 | 5,638591905 | 0,016427844 | 0,018995723 |
| src-like adaptor                                                                               | 1,242382644 | 4,979957759 | 5,635219506 | 0,016458195 | 0,019018115 |
| glucose-fructose oxidoreductase domain containing 2                                            | 1,015860862 | 4,746581902 | 5,632249691 | 0,016484976 | 0,019036354 |
| A kinase (PRKA) anchor protein 17B                                                             | 1,23045535  | 6,232697036 | 5,620167695 | 0,016594446 | 0,019149991 |
| coiled-coil domain containing 92                                                               | 1,044565038 | 4,788954806 | 5,611538827 | 0,016673138 | 0,019227983 |
| translin                                                                                       | 1,363368698 | 7,135716419 | 5,606106224 | 0,016722902 | 0,019272532 |
| small nuclear RNA activating complex, polypeptide 3                                            | 1,130687596 | 6,98770287  | 5,602829898 | 0,016752995 | 0,019294368 |
| cullin associated and neddylation disassociated 1                                              | 1,053174111 | 9,639736394 | 5,59651913  | 0,016811136 | 0,019348456 |
| phosphatidylserine decarboxylase                                                               | 1,157232282 | 5,122292527 | 5,590685952 | 0,016865083 | 0,019397647 |
| interleukin 17 receptor D                                                                      | 1,33645243  | 4,988696609 | 5,587299717 | 0,016896491 | 0,019420867 |
| large tumor suppressor                                                                         | 1,197357641 | 7,608404155 | 5,585494875 | 0,016913259 | 0,01942724  |
| BUD31 homolog (yeast)                                                                          | 1,088005721 | 9,142663521 | 5,575494735 | 0,01700651  | 0,019513676 |
| 2'-5' oligoadenylate synthetase 2                                                              | 1,058828595 | 5,294609381 | 5,575008898 | 0,017011056 | 0,019513676 |
| WD repeat domain containing 82                                                                 | 1,245988025 | 6,298422246 | 5,570424118 | 0,017054019 | 0,019550004 |
| golgi autoantigen, golgin subfamily a, 4                                                       | 1,222697019 | 5,604565259 | 5,564015291 | 0,017114284 | 0,019606105 |
| RIKEN cDNA 1190005F20 gene                                                                     | 1,235966286 | 6,416635674 | 5,562211681 | 0,017131288 | 0,019612605 |
| tetratricopeptide repeat domain 9C                                                             | 1,320091571 | 4,788489606 | 5,559166516 | 0,017160041 | 0,019632538 |
| killer cell lectin-like receptor subfamily B member 1B                                         | 1,432301533 | 5,035076556 | 5,55430518  | 0,017206058 | 0,019672183 |
| tubulin, gamma 2                                                                               | 1,202474491 | 4,815624001 | 5,546830116 | 0,017277092 | 0,01974036  |
| expressed sequence C78339                                                                      | 1,263851933 | 7,263922216 | 5,543039094 | 0,017313246 | 0,019755781 |
| glucocorticoid modulatory element binding protein 2                                            | 1,229678751 | 5,64951512  | 5,54302145  | 0,017313414 | 0,019755781 |
| smu-1 suppressor of mec-8 and unc-52 homolog (C. elegans)                                      | 1,148991229 | 9,284022929 | 5,540868142 | 0,017333989 | 0,019761686 |
| exocyst complex component 6B                                                                   | 1,283781319 | 8,732116726 | 5,54009087  | 0,017341422 | 0,019761686 |
| Bardet-Biedl syndrome 12 (human)                                                               | 1,236968386 | 5,383583957 | 5,535913571 | 0,017381435 | 0,019794252 |
| lysine (K)-specific demethylase 4A                                                             | 1,196310735 | 5,732549425 | 5,52759093  | 0,01746147  | 0,019872324 |
| polybromo 1                                                                                    | 1,349410085 | 4,972402385 | 5,52062277  | 0,017528805 | 0,019935849 |
| cytochrome c oxidase, subunit VI a, polypeptide 2                                              | 1,119355687 | 5,185302708 | 5,508469486 | 0,01764696  | 0,02005705  |
| spindlin 1                                                                                     | 1,2681781   | 4,787241247 | 5,505716657 | 0,017673849 | 0,020074431 |
| kinesin-associated protein 3                                                                   | 1,031514738 | 7,204193808 | 5,494050394 | 0,017788328 | 0,020189937 |
| heat shock protein 1A                                                                          | 1,135861773 | 5,102781274 | 5,492980446 | 0,01779887  | 0,020189937 |
| telomeric repeat binding factor 2, interacting protein                                         | 1,307535963 | 6,740097309 | 5,489548317 | 0,017832734 | 0,020215103 |
| zinc finger protein 322A                                                                       | 1,387613237 | 5,210855891 | 5,48336585  | 0,01789392  | 0,020261987 |
| mannoside acetylglucosaminyltransferase 4, isoenzyme A                                         | 1,437521333 | 5,070942569 | 5,483004596 | 0,017897503 | 0,020261987 |
| PRP3 pre-mRNA processing factor 3 homolog (yeast)                                              | 1,161033387 | 8,572795233 | 5,478530745 | 0,01794194  | 0,020299019 |
| protein-L-isoaspartate (D-aspartate) O-methyltransferase 1                                     | 1,14227226  | 5,755267848 | 5,475116893 | 0,017975934 | 0,020324195 |

|                                                                                    |             |             |             |             |             |
|------------------------------------------------------------------------------------|-------------|-------------|-------------|-------------|-------------|
| transmembrane protein 218                                                          | 1,209453475 | 5,150436856 | 5,470415887 | 0,018022866 | 0,020349911 |
| sodium channel modifier 1                                                          | 1,151860828 | 8,269901629 | 5,469712718 | 0,018029898 | 0,020349911 |
| Dnaj (Hsp40) homolog, subfamily A, member 2                                        | 1,352959868 | 6,144760606 | 5,468746355 | 0,018039567 | 0,020349911 |
| hyaluronan and proteoglycan link protein 4                                         | 1,121358437 | 5,12241579  | 5,468133338 | 0,018045704 | 0,020349911 |
| RIKEN cDNA 1700029G01 gene                                                         | 1,104704204 | 7,868026862 | 5,465524359 | 0,018071849 | 0,020366126 |
| methyltransferase like 21A                                                         | 1,269700063 | 5,281286625 | 5,461234374 | 0,018114934 | 0,020389358 |
| RIKEN cDNA 4933426M11 gene                                                         | 1,115580624 | 7,816718331 | 5,460043268 | 0,018126917 | 0,020389358 |
| homeodomain interacting protein kinase 3                                           | 1,364438725 | 7,190654226 | 5,459955539 | 0,0181278   | 0,020389358 |
| adducin 1 (alpha)                                                                  | 1,119899881 | 6,931708732 | 5,454681551 | 0,018180972 | 0,020429222 |
| LAS1-like (S. cerevisiae)                                                          | 1,118924757 | 4,805324339 | 5,454099979 | 0,018186846 | 0,020429222 |
| mago-nashi homolog, proliferation-associated (Drosophila)                          | 1,040213078 | 7,783556358 | 5,450456436 | 0,018223699 | 0,020457343 |
| chromodomain helicase DNA binding protein 2                                        | 1,11298542  | 4,76806638  | 5,447192124 | 0,018256788 | 0,020481205 |
| family with sequence similarity 69, member C                                       | 1,138515751 | 4,704900304 | 5,4317164   | 0,018414601 | 0,020641409 |
| acidic (leucine-rich) nuclear phosphoprotein 32 family, member E                   | 1,283172883 | 7,613110324 | 5,430853948 | 0,018423441 | 0,020641409 |
| transcription factor EB                                                            | 1,17436391  | 4,667125838 | 5,421091385 | 0,018523854 | 0,020740486 |
| FAT tumor suppressor homolog 2 (Drosophila)                                        | 1,157559974 | 4,659414328 | 5,419402138 | 0,018541293 | 0,020746592 |
| F-box protein 25                                                                   | 1,114760269 | 7,773172843 | 5,402828776 | 0,018713384 | 0,020925626 |
| phosphoglycerate mutase family member 5                                            | 1,202335515 | 8,767730599 | 5,396416089 | 0,018780462 | 0,020987076 |
| PDZ and LIM domain 4                                                               | 1,068615793 | 11,92396366 | 5,388177451 | 0,018867045 | 0,021070229 |
| LUC7-like 3 (S. cerevisiae)                                                        | 1,175136268 | 9,60089921  | 5,382314822 | 0,018928936 | 0,021099263 |
| 40S ribosomal protein S6-like                                                      | 1,197632498 | 6,455769437 | 5,382064066 | 0,018931589 | 0,021099263 |
| HAUS augmin-like complex, subunit 1                                                | 1,205584539 | 6,277715811 | 5,381730658 | 0,018935116 | 0,021099263 |
| sorting nexin 5                                                                    | 1,348511723 | 5,831066745 | 5,381099149 | 0,018941799 | 0,021099263 |
| guanine nucleotide binding protein (G protein), beta polypeptide 1-like            | 1,261044837 | 6,920643369 | 5,374762615 | 0,019090008 | 0,021156532 |
| EGF-like repeats and discoidin I-like domains 3                                    | 1,456891288 | 4,963471778 | 5,373949076 | 0,019017656 | 0,021156532 |
| coatomer protein complex, subunit epsilon                                          | 1,25105677  | 8,457159644 | 5,369650144 | 0,019063433 | 0,021190907 |
| ubiquitin carboxyl-terminal esterase L5                                            | 1,025118981 | 9,494734605 | 5,368749397 | 0,01907304  | 0,021190907 |
| TGF-beta activated kinase 1/MAP3K7 binding protein 2                               | 1,066054712 | 8,961108238 | 5,3497842   | 0,019276619 | 0,021403353 |
| A kinase (PRKA) anchor protein 17B                                                 | 1,209093608 | 6,369057503 | 5,338852802 | 0,019395091 | 0,021521092 |
| protein tyrosine phosphatase, non-receptor type 9                                  | 1,25113212  | 4,674761868 | 5,331678892 | 0,019473294 | 0,021594024 |
| predicted gene 166                                                                 | 1,10154112  | 4,937630411 | 5,329972873 | 0,019491946 | 0,021600869 |
| sodium channel modifier 1                                                          | 1,022831492 | 4,938322237 | 5,322097788 | 0,019578304 | 0,021682669 |
| polymerase (DNA-directed), delta 4                                                 | 1,154347779 | 8,745850793 | 5,317625442 | 0,019627543 | 0,021723323 |
| Rho GTPase activating protein 22                                                   | 1,113529787 | 8,393964508 | 5,306692229 | 0,019748514 | 0,021843244 |
| centrosomal protein 120                                                            | 1,088599546 | 9,587969221 | 5,301826287 | 0,019802628 | 0,021884365 |
| ubiquitin-conjugating enzyme E2K (UBC1 homolog, yeast)                             | 1,172206103 | 10,78240526 | 5,301076931 | 0,019810977 | 0,021884365 |
| tachykinin receptor 1                                                              | 1,147239096 | 4,689761215 | 5,299328306 | 0,019830474 | 0,021891933 |
| centrosomal protein 120                                                            | 1,325464237 | 5,887489287 | 5,294161018 | 0,019888218 | 0,021941686 |
| spastin                                                                            | 1,241849743 | 7,923829468 | 5,287904632 | 0,019958392 | 0,022004401 |
| eukaryotic translation elongation factor 1 epsilon 1                               | 1,319880467 | 8,435711738 | 5,286828775 | 0,019970488 | 0,022004401 |
| RIKEN cDNA 1810063B05 gene                                                         | 1,030084305 | 9,054722615 | 5,281607102 | 0,020029314 | 0,022055179 |
| small nuclear ribonucleoprotein 35 (U11/U12)                                       | 1,302166551 | 8,318923274 | 5,273444616 | 0,020121669 | 0,02214279  |
| tetratricopeptide repeat domain 7                                                  | 1,219968212 | 5,56123427  | 5,269399796 | 0,020167615 | 0,022179251 |
| mediator of RNA polymerase II transcription, subunit 28 homolog (yeast)            | 1,254797071 | 10,39399204 | 5,26263026  | 0,020244782 | 0,022249979 |
| transformation related protein 53 binding protein 1                                | 1,131917888 | 4,918361951 | 5,245812587 | 0,020437958 | 0,022448036 |
| colony stimulating factor 2 receptor, beta, low-affinity (granulocyte-macrophage)  | 1,089487947 | 6,512132972 | 5,240533293 | 0,020499034 | 0,022500842 |
| Wolf-Hirschhorn syndrome candidate 1 (human)                                       | 1,099789834 | 5,581695747 | 5,228191963 | 0,020642628 | 0,022633252 |
| BCL2-interacting killer                                                            | 1,233798733 | 4,961959886 | 5,227919254 | 0,020645814 | 0,022633252 |
| RIKEN cDNA 4930455F23 gene                                                         | 1,148045719 | 7,195204977 | 5,22638722  | 0,020663723 | 0,022638547 |
| CCR4-NOT transcription complex, subunit 4                                          | 1,095905718 | 5,76144275  | 5,223239041 | 0,020700581 | 0,022664583 |
| adenylate kinase 2                                                                 | 1,13505603  | 6,583575579 | 5,221771189 | 0,020717791 | 0,022669088 |
| zinc finger protein 703                                                            | 1,328322903 | 6,537156883 | 5,215939251 | 0,020786334 | 0,02271652  |
| ST3 beta-galactoside alpha-2,3-sialyltransferase 6                                 | 1,291752217 | 4,792282853 | 5,214764538 | 0,020800171 | 0,02271652  |
| ubiquitin B                                                                        | 1,164276808 | 14,80014844 | 5,213424585 | 0,020815969 | 0,02271652  |
| CLK4-associating serine/arginine rich protein                                      | 1,271547694 | 7,272702397 | 5,212522185 | 0,020826615 | 0,02271652  |
| FK506 binding protein-like                                                         | 1,404302706 | 5,860434325 | 5,212510125 | 0,020826757 | 0,02271652  |
| actin related protein 2/3 complex, subunit 2                                       | 1,223798787 | 10,91784545 | 5,198472153 | 0,020993184 | 0,022883628 |
| cysteine conjugate-beta lyase 2                                                    | 1,147167958 | 5,005711399 | 5,196110278 | 0,021021335 | 0,022899893 |
| RAB6, member RAS oncogene family                                                   | 1,135942158 | 8,080467387 | 5,178925314 | 0,021227468 | 0,023109903 |
| coiled-coil domain containing 94                                                   | 1,04904641  | 6,002609931 | 5,175275651 | 0,021271543 | 0,023139087 |
| basic helix-loop-helix domain containing, class B9                                 | 1,105494848 | 5,370249288 | 5,174492913 | 0,021281009 | 0,023139087 |
| melanoma antigen, family B, 3                                                      | 1,036860226 | 4,57551605  | 5,169599347 | 0,021340302 | 0,023188991 |
| MAP7 domain containing 2                                                           | 1,340535462 | 4,846232442 | 5,165448339 | 0,021390746 | 0,023229223 |
| bobby sox homolog (Drosophila)                                                     | 1,256246134 | 5,445890731 | 5,15870219  | 0,021473018 | 0,023291901 |
| eukaryotic translation initiation factor 3, subunit A                              | 1,101892596 | 8,722585041 | 5,157588113 | 0,02148664  | 0,023291901 |
| cytochrome b5 reductase 3                                                          | 1,083733521 | 5,810477012 | 5,157409031 | 0,02148883  | 0,023291901 |
| amyotrophic lateral sclerosis 2 (juvenile) chromosome region, candidate 4          | 1,10881439  | 6,229998864 | 5,151939944 | 0,021555851 | 0,023349924 |
| cytohesin 1 interacting protein                                                    | 1,237991769 | 14,36532597 | 5,148214898 | 0,021601637 | 0,023384887 |
| protein phosphatase 3, regulatory subunit B, alpha isoform (calcineurin B, type I) | 1,041974333 | 11,09343935 | 5,145367526 | 0,02163671  | 0,023408216 |
| family with sequence similarity 164, member A                                      | 1,230692493 | 7,288483844 | 5,141663113 | 0,021682438 | 0,023438185 |
| MAD homolog 1 (Drosophila)                                                         | 1,259709254 | 7,759815262 | 5,140930767 | 0,021691492 | 0,023438185 |
| translocase of outer mitochondrial membrane 7 homolog (yeast)                      | 1,071622024 | 10,16138878 | 5,134254025 | 0,02177423  | 0,023512909 |
| SMT3 suppressor of mif two 3 homolog 1 (yeast)                                     | 1,121259639 | 10,08411472 | 5,125676784 | 0,021881052 | 0,023613529 |
| potassium voltage-gated channel, subfamily Q, member 1                             | 1,090265599 | 4,646570303 | 5,123080999 | 0,021913498 | 0,02363381  |
| proteasome (prosome, macropain) subunit, alpha type 3                              | 1,168023954 | 10,91127815 | 5,118839796 | 0,02196663  | 0,023676362 |
| golgi membrane protein 1                                                           | 1,196312277 | 8,802368734 | 5,108687584 | 0,022094415 | 0,023799273 |
| SAP30-like                                                                         | 1,188303105 | 6,211073532 | 5,105541353 | 0,022134189 | 0,023819017 |
| polynucleotide kinase 3'-phosphatase                                               | 1,275888494 | 10,33458298 | 5,104858766 | 0,022142829 | 0,023819017 |
| ubiquitin-conjugating enzyme E2H                                                   | 1,0998422   | 5,31113701  | 5,103974687 | 0,022154025 | 0,023819017 |
| predicted gene 12693                                                               | 1,163686509 | 8,812270908 | 5,092405417 | 0,022301141 | 0,023934018 |
| RIKEN cDNA 2610002J02 gene                                                         | 1,040244753 | 8,62790854  | 5,091727278 | 0,022309799 | 0,023934018 |

|                                                                                                     |             |             |             |             |             |
|-----------------------------------------------------------------------------------------------------|-------------|-------------|-------------|-------------|-------------|
| RIKEN cDNA 2810001G20 gene                                                                          | 1,13188906  | 5,445336664 | 5,091494926 | 0,022312766 | 0,023934018 |
| eukaryotic translation initiation factor 4E member 3                                                | 1,08204997  | 5,292297498 | 5,091218699 | 0,022316294 | 0,023934018 |
| zinc finger protein 292                                                                             | 1,111316745 | 7,571198827 | 5,089612054 | 0,022336829 | 0,023941208 |
| ADP-ribosylation factor-like 8A                                                                     | 1,144110033 | 11,1945537  | 5,077416819 | 0,022493405 | 0,024080524 |
| syntaxin 11                                                                                         | 1,075760366 | 11,89144719 | 5,07701474  | 0,022498589 | 0,024080524 |
| golgi SNAP receptor complex member 2                                                                | 1,164756271 | 8,131387445 | 5,076242974 | 0,022508543 | 0,024080524 |
| YME1-like 1 ( <i>S. cerevisiae</i> )                                                                | 1,1976526   | 7,378367522 | 5,074332101 | 0,022533209 | 0,024092023 |
| bioorientation of chromosomes in cell division 1-like                                               | 1,161855063 | 5,319645082 | 5,07046567  | 0,022583215 | 0,024130583 |
| APAF1 interacting protein                                                                           | 1,29939233  | 4,971094231 | 5,062685073 | 0,022684229 | 0,024212376 |
| signal transducer and activator of transcription 6                                                  | 1,223238695 | 7,626807962 | 5,051770403 | 0,022687738 | 0,024212376 |
| C-terminal binding protein 2                                                                        | 1,344648431 | 5,989478857 | 5,056788749 | 0,022761126 | 0,024275729 |
| cytochrome c, somatic                                                                               | 1,470582613 | 5,163532979 | 5,055318102 | 0,022780352 | 0,024279119 |
| integrator complex subunit 3                                                                        | 1,064442728 | 6,414554677 | 5,054400593 | 0,022792356 | 0,024279119 |
| RAS, dexamethasone-induced 1                                                                        | 1,103461268 | 4,762068409 | 5,051770403 | 0,022826808 | 0,024300863 |
| expressed sequence AA960436                                                                         | 1,381502427 | 4,984888924 | 5,040085652 | 0,022980585 | 0,024449535 |
| mitochondrial translational release factor 1                                                        | 1,310891535 | 5,949128002 | 5,032073425 | 0,023086718 | 0,024547364 |
| DCN1, defective in cullin neddylation 1, domain containing 1 ( <i>S. cerevisiae</i> )               | 1,235591894 | 6,904662877 | 5,028174027 | 0,023138573 | 0,024586512 |
| RIKEN cDNA 3110003A17 gene                                                                          | 1,101609069 | 4,768002617 | 5,027170202 | 0,023151944 | 0,024586512 |
| RIKEN cDNA 6330503K22 gene                                                                          | 1,207578805 | 5,629676158 | 5,018722274 | 0,023264822 | 0,024691236 |
| DEAD/H (Asp-Glu-Ala-Asp/His) box polypeptide 3, X-linked                                            | 1,37609706  | 6,489042253 | 4,964565895 | 0,024003608 | 0,025459709 |
| forkhead box J3                                                                                     | 1,14581246  | 8,28420868  | 4,953606503 | 0,024156366 | 0,025606043 |
| dynein, axonemal, light chain 1                                                                     | 1,183125764 | 4,789682172 | 4,950942909 | 0,02419366  | 0,025629881 |
| methylcrotonoyl-Coenzyme A carboxylase 1 (alpha)                                                    | 1,328268268 | 5,164759158 | 4,949472919 | 0,024214271 | 0,025636026 |
| TBC1 domain family, member 9B                                                                       | 1,122700278 | 4,729164724 | 4,937198316 | 0,02438716  | 0,025803285 |
| proteasome (prosome, macropain) 26S subunit, non-ATPase, 12                                         | 1,309500164 | 5,953669321 | 4,936142474 | 0,024402098 | 0,025803318 |
| centrosomal protein 350                                                                             | 1,071995237 | 4,8000757   | 4,934744443 | 0,02421893  | 0,025808484 |
| glutathione S-transferase, mu 5                                                                     | 1,179604148 | 6,837964651 | 4,931890914 | 0,024462354 | 0,025834473 |
| EF hand domain family A1                                                                            | 1,208747796 | 9,709079811 | 4,930906155 | 0,024476335 | 0,025834473 |
| alanine-glyoxylate aminotransferase 2-like 2                                                        | 1,273214235 | 5,02392067  | 4,927071219 | 0,024530868 | 0,025876254 |
| aldo-keto reductase family 1, member D1                                                             | 1,061642539 | 4,556381575 | 4,92077695  | 0,024620675 | 0,025935293 |
| platelet-activating factor acetylhydrolase, isoform 1b, subunit 1                                   | 1,062442824 | 9,450944452 | 4,920618711 | 0,024622938 | 0,025935293 |
| tumor protein D52-like 2                                                                            | 1,190446701 | 8,427999729 | 4,920000065 | 0,024631786 | 0,025935293 |
| smu-1 suppressor of mec-8 and unc-52 homolog ( <i>C. elegans</i> )                                  | 1,227941168 | 5,754605733 | 4,915184576 | 0,024700784 | 0,025992132 |
| transcription factor 20                                                                             | 1,189122291 | 4,977198187 | 4,909763037 | 0,024778732 | 0,026058314 |
| brain and reproductive organ-expressed protein                                                      | 1,090393218 | 8,096782199 | 4,90801072  | 0,024803986 | 0,026069034 |
| leucine carboxyl methyltransferase 1                                                                | 1,163329302 | 8,720027677 | 4,903083392 | 0,024875156 | 0,02612797  |
| muscleblind-like 2                                                                                  | 1,142474007 | 8,363662752 | 4,892015826 | 0,02503587  | 0,026280832 |
| AT rich interactive domain 4A (RBP1-like)                                                           | 1,171811561 | 6,514909761 | 4,89716367  | 0,02506941  | 0,026300009 |
| G kinase anchoring protein 1                                                                        | 1,237871462 | 7,921857197 | 4,880528929 | 0,025203934 | 0,026425203 |
| RIKEN cDNA 4631423B10 gene                                                                          | 1,185687925 | 6,160400129 | 4,876353103 | 0,025265351 | 0,026473561 |
| IGF-like family member 3                                                                            | 1,083879324 | 4,646683689 | 4,853862804 | 0,025599096 | 0,026807039 |
| zinc finger, SWIM domain containing 5                                                               | 1,171982691 | 4,733659019 | 4,850658432 | 0,025647058 | 0,026841026 |
| histidine triad nucleotide binding protein 3                                                        | 1,169813444 | 9,253030656 | 4,847288815 | 0,025697604 | 0,026864414 |
| nemo like kinase                                                                                    | 1,15439627  | 7,974907736 | 4,846168894 | 0,025714429 | 0,026864414 |
| chromatin accessibility complex 1                                                                   | 1,115302389 | 9,431586656 | 4,840666763 | 0,025715964 | 0,026864414 |
| HCLS1 associated X-1                                                                                | 1,170213489 | 10,65566355 | 4,842857861 | 0,025764245 | 0,026898618 |
| mitochondrial ribosomal protein L47                                                                 | 1,241466274 | 4,968542785 | 4,840079153 | 0,025806137 | 0,02692369  |
| Scm-like with four mbt domains 1                                                                    | 1,21151474  | 5,493961712 | 4,839202666 | 0,025819368 | 0,02692369  |
| polymerase (RNA) III (DNA directed) polypeptide G                                                   | 1,069163729 | 4,69349766  | 4,830879553 | 0,025945391 | 0,027038815 |
| CD5 antigen                                                                                         | 1,270625456 | 4,681535819 | 4,828430726 | 0,025982603 | 0,027045234 |
| engulfment and cell motility 1, ced-12 homolog ( <i>C. elegans</i> )                                | 1,314825439 | 5,677421388 | 4,828417912 | 0,025982798 | 0,027045234 |
| tetratricopeptide repeat domain 9C                                                                  | 1,145322016 | 9,847418766 | 4,826259358 | 0,026015651 | 0,027063156 |
| RIKEN cDNA 6030458C11 gene                                                                          | 1,344622081 | 4,937274529 | 4,821699673 | 0,026085205 | 0,027119213 |
| RIKEN cDNA A430107P09 gene                                                                          | 1,106496118 | 4,549987492 | 4,818658649 | 0,026131712 | 0,027151257 |
| exocyst complex component 4                                                                         | 1,104192684 | 6,577821427 | 4,810555133 | 0,026256105 | 0,027264138 |
| zinc finger, BED domain containing 4                                                                | 1,23904527  | 6,66810243  | 4,799877845 | 0,026421045 | 0,027406649 |
| PRAME family member 8                                                                               | 1,252081428 | 8,010430258 | 4,79916832  | 0,026432048 | 0,027406649 |
| aminoacyl tRNA synthetase complex-interacting multifunctional protein 2                             | 1,067036984 | 7,36449889  | 4,798601252 | 0,026440845 | 0,027406649 |
| predicted gene 14439                                                                                | 1,27480385  | 6,050427821 | 4,791983142 | 0,026543765 | 0,027496863 |
| nudix (nucleoside diphosphate linked moiety X)-type motif 1                                         | 1,192145203 | 6,375225605 | 4,783930789 | 0,026669609 | 0,027610702 |
| RIKEN cDNA E030030I06 gene                                                                          | 1,090794928 | 5,02615447  | 4,782790393 | 0,026687487 | 0,027612696 |
| aquarius                                                                                            | 1,151710451 | 7,114578124 | 4,775501141 | 0,026802083 | 0,027708024 |
| predicted gene 9897                                                                                 | 1,222908774 | 7,182096812 | 4,774895157 | 0,026811635 | 0,027708024 |
| acyl-CoA thioesterase 8                                                                             | 1,220389458 | 4,784333598 | 4,773362827 | 0,026835807 | 0,027713864 |
| RNA binding protein gene with multiple splicing                                                     | 1,205529294 | 7,717401716 | 4,772057592 | 0,026856416 | 0,027713864 |
| histocompatibility 2, class II antigen E beta2                                                      | 1,215858992 | 6,14206008  | 4,771494278 | 0,026865317 | 0,027713864 |
| Smad nuclear interacting protein 1                                                                  | 1,067743149 | 7,058436037 | 4,753961562 | 0,027144025 | 0,027984697 |
| protein phosphatase 2 (formerly 2A), regulatory subunit B (PR 52), alpha isoform                    | 1,219738697 | 5,002656973 | 4,743054911 | 0,027319074 | 0,028143399 |
| bone marrow stromal cell antigen 2                                                                  | 1,301811148 | 9,626290273 | 4,74231169  | 0,02733105  | 0,028143399 |
| pancreatic progenitor cell differentiation and proliferation factor homolog (zebrafish)RIKEN cDNA 2 | 1,096706449 | 9,317878131 | 4,730894729 | 0,027515771 | 0,02831736  |
| RIKEN cDNA 1200016B10 gene                                                                          | 1,08530918  | 6,803527431 | 4,725224251 | 0,027608049 | 0,028395444 |
| N-myc downstream regulated gene 2                                                                   | 1,343949971 | 5,436015285 | 4,72154321  | 0,027668141 | 0,028440352 |
| YY1 associated factor 2                                                                             | 1,171128821 | 5,468710087 | 4,713870782 | 0,027793876 | 0,02855264  |
| interferon-related developmental regulator 1                                                        | 1,177478933 | 5,130913688 | 4,708670702 | 0,027879467 | 0,02862358  |
| RIKEN cDNA 1810055G02 gene                                                                          | 1,161616534 | 7,86699366  | 4,704774208 | 0,027943799 | 0,028672624 |
| family with sequence similarity 131, member A                                                       | 1,134801964 | 7,64362424  | 4,694542637 | 0,028113538 | 0,0288297   |
| asparagine-linked glycosylation 9 homolog (yeast, alpha 1,2 mannosyltransferase)                    | 1,083570052 | 5,684741764 | 4,69267709  | 0,028144614 | 0,028838476 |
| protein arginine N-methyltransferase 2                                                              | 1,077355529 | 10,31801607 | 4,692029204 | 0,028155415 | 0,028838476 |
| deoxythymidylate kinase                                                                             | 1,104435164 | 6,975250338 | 4,681017541 | 0,028339733 | 0,029010099 |
| forkhead box N3                                                                                     | 1,314363789 | 6,358570851 | 4,664896775 | 0,028612069 | 0,029271567 |
| acyl-Coenzyme A dehydrogenase, short/branched chain                                                 | 1,364444573 | 7,35157977  | 4,658767006 | 0,028716409 | 0,029360959 |

|                                                                                |             |             |             |             |             |
|--------------------------------------------------------------------------------|-------------|-------------|-------------|-------------|-------------|
| glycosyltransferase 8 domain containing 1                                      | 1,248389457 | 6,867833611 | 4,647210052 | 0,028914318 | 0,029545859 |
| AT rich interactive domain 3A (BRIGHT-like)                                    | 1,204271934 | 6,895847097 | 4,627646455 | 0,029252915 | 0,029870753 |
| NEDD4 binding protein 2-like 2                                                 | 1,118110834 | 10,08265322 | 4,626850877 | 0,02926678  | 0,029870753 |
| inositol monophosphatase domain containing 1                                   | 1,155079995 | 6,472588735 | 4,623434967 | 0,029326399 | 0,029913964 |
| casein kinase 1, delta                                                         | 1,13929768  | 10,45064363 | 4,597969586 | 0,029775265 | 0,030342656 |
| kinesin family member 1B                                                       | 1,220154802 | 8,963409314 | 4,597606098 | 0,029781729 | 0,030342656 |
| protein phosphatase 1, regulatory (inhibitor) subunit 11                       | 1,166528654 | 9,995068576 | 4,595831391 | 0,029813311 | 0,030356966 |
| zinc finger with KRAB and SCAN domains 6                                       | 1,145381097 | 7,94120335  | 4,591341815 | 0,029893378 | 0,030410002 |
| methionine sulfoxide reductase B3                                              | 1,164640372 | 4,703134767 | 4,59094127  | 0,029900533 | 0,030410002 |
| neutrophil cytosolic factor 1                                                  | 1,115133507 | 8,48650504  | 4,585677474 | 0,029994748 | 0,03047457  |
| ubiquitin-conjugating enzyme E2Q (putative) 1                                  | 1,156099008 | 10,77284352 | 4,585427544 | 0,02999923  | 0,03047457  |
| serine/arginine-rich splicing factor 11                                        | 1,195244033 | 7,675079356 | 4,581039581 | 0,030078042 | 0,03053671  |
| expressed sequence AI597479                                                    | 1,144831603 | 6,816944154 | 4,568505329 | 0,030304481 | 0,030748568 |
| REV3-like, catalytic subunit of DNA polymerase zeta RAD54 like (S. cerevisiae) | 1,210931127 | 6,131881471 | 4,565048327 | 0,030367277 | 0,030794234 |
| 14-3-3 protein theta-like                                                      | 1,080561755 | 8,758623092 | 4,557833703 | 0,030498812 | 0,03090951  |
| cDNA sequence BC031181                                                         | 1,162023196 | 10,46793948 | 4,552841079 | 0,030590218 | 0,030984007 |
| CNDP dipeptidase 2 (metallopeptidase M20 family)                               | 1,162245662 | 5,56654915  | 4,542503304 | 0,030780485 | 0,031158491 |
| mitogen-activated protein kinase kinase 7                                      | 1,26545289  | 5,187132413 | 4,541455384 | 0,03079987  | 0,031159858 |
| cyclin D-type binding-protein 1                                                | 1,174085525 | 8,774720449 | 4,53467972  | 0,030925381 | 0,031268595 |
| neuralized homolog 1A (Drosophila)                                             | 1,124352594 | 5,027384421 | 4,502588654 | 0,031527962 | 0,031859254 |
| mannose-6-phosphate receptor, cation dependent                                 | 1,180346836 | 12,20952554 | 4,500454887 | 0,031568503 | 0,03188161  |
| zinc finger, CCHC domain containing 3                                          | 1,110910437 | 5,185349563 | 4,47305425  | 0,032077971 | 0,032377241 |
| HAUS augmin-like complex, subunit 6                                            | 1,09483676  | 6,358801905 | 4,458085462 | 0,032386027 | 0,032669122 |
| transmembrane protein 106B                                                     | 1,220067493 | 5,907588385 | 4,435571349 | 0,032830303 | 0,033097994 |
| zinc finger, CCHC domain containing 6                                          | 1,093261484 | 10,13107131 | 4,413869641 | 0,033265176 | 0,033516891 |
| ROD1 regulator of differentiation 1 (S. pombe)                                 | 1,21568351  | 6,637648502 | 4,405235785 | 0,03344002  | 0,033673458 |
| open reading frame 19                                                          | 1,251234489 | 5,027887384 | 4,398150793 | 0,033584286 | 0,033799069 |
| myeloid/lymphoid or mixed-lineage leukemia 5                                   | 1,198798358 | 7,861313905 | 4,391383743 | 0,033722745 | 0,033912137 |
| atlastin GTPase 3                                                              | 1,215192158 | 8,145916812 | 4,390746487 | 0,033735817 | 0,033912137 |
| CUGBP, Elav-like family member 2                                               | 1,178669416 | 7,666473144 | 4,319535435 | 0,035233906 | 0,0353975   |
| zinc finger, CCHC domain containing 9                                          | 1,200088412 | 7,62475338  | 4,317473702 | 0,035278403 | 0,035421644 |
| ring finger protein 14                                                         | 1,188418474 | 5,892126942 | 4,303011919 | 0,035592333 | 0,035716133 |
| AMME chromosomal region gene 1-like                                            | 1,162245446 | 7,450124037 | 4,299132427 | 0,035677092 | 0,035776689 |
| StAR-related lipid transfer (START) domain containing 4                        | 1,263580395 | 6,781913793 | 4,298359027 | 0,035694017 | 0,035776689 |
| chaperonin containing Tcp1, subunit 8 (theta)                                  | 1,164359893 | 9,941738177 | 4,294694671 | 0,035774331 | 0,035836439 |
| TAF12 RNA polymerase II, TATA box binding protein (TBP)-associated factor      | 1,169642129 | 8,572392953 | 4,287335352 | 0,035936258 | 0,035977827 |
| nuclear apoptosis inducing factor 1                                            | 1,208880934 | 5,114528872 | 4,285866835 | 0,03596867  | 0,035989462 |
| DEAH (Asp-Glu-Ala-His) box polypeptide 15                                      | 1,186893625 | 10,19338411 | 4,282498381 | 0,036043144 | 0,036043144 |

**Panel 6: Genes significantly down-regulated in *Aggregatibacter actinomycetemcomitans* treated DCs (FDR < 0.05), but not regulated in response to *Porphyromonas gingivalis* challenge.**

| Name                                                           | FC Pg       | AveExpr     | F           | P.Value  | adj.P.Val |
|----------------------------------------------------------------|-------------|-------------|-------------|----------|-----------|
| docking protein 2                                              | 0,851203797 | 7,390419972 | 376,1898443 | 1,19E-12 | 2,08E-09  |
| arachidonate 5-lipoxygenase activating protein                 | 1,020990118 | 11,26160825 | 315,2243229 | 3,87E-12 | 2,96E-09  |
| arachidonate 5-lipoxygenase activating protein                 | 1,054407396 | 10,90319424 | 302,792387  | 5,06E-12 | 2,96E-09  |
| allograft inflammatory factor 1                                | 0,76298252  | 8,477464752 | 257,4167896 | 1,49E-11 | 6,53E-09  |
| dynein, axonemal, heavy chain 2                                | 0,738364719 | 8,523050523 | 207,9680172 | 6,12E-11 | 2,14E-08  |
| dynein, axonemal, heavy chain 2                                | 0,855758501 | 10,3101803  | 187,7652552 | 1,20E-10 | 3,50E-08  |
| cellular repressor of E1A-stimulated genes 1                   | 0,785160073 | 10,34678304 | 174,0223407 | 1,98E-10 | 4,95E-08  |
| neuropilin 1                                                   | 0,802733905 | 8,524164903 | 161,5165313 | 3,22E-10 | 7,06E-08  |
| Fas (TNF receptor superfamily member 6)                        | 0,797761319 | 9,466081363 | 157,4572771 | 3,80E-10 | 7,41E-08  |
| a disintegrin and metallopeptidase domain 23                   | 0,765453925 | 9,826525373 | 152,1082765 | 4,77E-10 | 8,12E-08  |
| protein kinase C, beta                                         | 0,934112301 | 9,448162839 | 149,0834317 | 5,43E-10 | 8,12E-08  |
| Fas (TNF receptor superfamily member 6)                        | 0,808293051 | 10,77588372 | 148,561433  | 5,56E-10 | 8,12E-08  |
| 3'-phosphoadenosine 5'-phosphosulfate synthase 2               | 0,775491917 | 10,36850258 | 137,3231894 | 9,27E-10 | 1,25E-07  |
| protein kinase C, beta                                         | 1,050173408 | 6,933286158 | 127,7618265 | 1,48E-09 | 1,85E-07  |
| allograft inflammatory factor 1                                | 0,859985163 | 7,569024119 | 124,0326343 | 1,79E-09 | 2,10E-07  |
| toll-like receptor 13                                          | 0,827364467 | 8,068428572 | 121,3965873 | 2,06E-09 | 2,26E-07  |
| predicted gene 4980                                            | 0,72146373  | 6,345752393 | 119,8561318 | 2,24E-09 | 2,31E-07  |
| apolipoprotein L 7c pseudogene                                 | 1,011074375 | 6,582408654 | 117,5093048 | 2,54E-09 | 2,47E-07  |
| amiloride binding protein 1 (amine oxidase, copper-containing) | 0,734106406 | 7,771562519 | 115,6841342 | 2,81E-09 | 2,59E-07  |
| RAS-like, estrogen-regulated, growth-inhibitor                 | 1,185627089 | 7,910137795 | 114,791255  | 2,95E-09 | 2,59E-07  |
| amylo-1,6-glucosidase, 4-alpha-glucanotransferase              | 0,835395542 | 8,277106783 | 111,3388587 | 3,59E-09 | 2,80E-07  |
| tubulin, beta 2B                                               | 0,769556704 | 10,44737369 | 109,7529461 | 3,94E-09 | 2,80E-07  |
| protein kinase C, beta                                         | 0,955190837 | 7,78067746  | 109,4485044 | 4,01E-09 | 2,80E-07  |
| interleukin 18 receptor 1                                      | 0,83470063  | 7,820882774 | 109,4353031 | 4,02E-09 | 2,80E-07  |
| BCL2-like 14 (apoptosis facilitator)                           | 0,722404091 | 7,157051408 | 108,7940008 | 4,17E-09 | 2,80E-07  |
| receptor accessory protein 1                                   | 1,021924698 | 8,277472804 | 108,3782796 | 4,27E-09 | 2,80E-07  |
| tetratricopeptide repeat domain 39A                            | 0,83315608  | 7,754576735 | 108,2369389 | 4,31E-09 | 2,80E-07  |
| DDHD domain containing 1                                       | 0,851643988 | 8,172780921 | 104,8051842 | 5,30E-09 | 3,32E-07  |
| lipoprotein lipase                                             | 0,824343144 | 13,3962428  | 102,9714779 | 5,93E-09 | 3,58E-07  |
| argininosuccinate synthetase 1                                 | 1,140207164 | 10,86141346 | 100,5118844 | 6,92E-09 | 4,04E-07  |
| lymphocyte antigen 9                                           | 1,186324777 | 9,501099904 | 98,15857342 | 8,05E-09 | 4,55E-07  |
| FXYD domain-containing ion transport regulator 2               | 1,001041602 | 7,895390695 | 96,51229686 | 8,96E-09 | 4,89E-07  |
| coiled-coil-helix-coiled-coil-helix domain containing 10       | 0,845257601 | 11,02368454 | 96,09735489 | 9,21E-09 | 4,89E-07  |
| U6 small nuclear RNA                                           | 0,687588379 | 10,508383   | 95,22310392 | 9,77E-09 | 5,03E-07  |
| transferrin receptor                                           | 1,295344452 | 8,248761244 | 89,79120725 | 1,42E-08 | 7,10E-07  |
| docking protein 3                                              | 0,814637793 | 9,197093803 | 89,01949124 | 1,50E-08 | 7,20E-07  |
| C-type lectin domain family 4, member a3                       | 0,76870692  | 8,585605147 | 88,81407493 | 1,52E-08 | 7,20E-07  |
| glycogenin                                                     | 0,993871302 | 9,311887698 | 86,49520526 | 1,80E-08 | 8,10E-07  |
| BTB (POZ) domain containing 11                                 | 0,756884587 | 5,768601648 | 86,44658662 | 1,80E-08 | 8,10E-07  |



|                                                                                             |             |             |             |          |          |
|---------------------------------------------------------------------------------------------|-------------|-------------|-------------|----------|----------|
| myelin-associated glycoprotein                                                              | 0,905726361 | 7,305733762 | 84,37509831 | 2,10E-08 | 9,21E-07 |
| potassium channel, subfamily K, member 13                                                   | 0,810313552 | 9,24374034  | 82,47498754 | 2,43E-08 | 1,04E-06 |
| grancalcin                                                                                  | 0,812477373 | 7,048730229 | 80,21772502 | 2,89E-08 | 1,21E-06 |
| solute carrier family 48 (heme transporter), member 1                                       | 1,071241354 | 10,27728224 | 78,84834025 | 3,22E-08 | 1,29E-06 |
| interferon gamma inducible protein 30                                                       | 0,760627276 | 9,520939867 | 78,81349291 | 3,23E-08 | 1,29E-06 |
| aminolevulinic acid synthase 1                                                              | 1,179446057 | 13,04808843 | 77,94829159 | 3,46E-08 | 1,35E-06 |
| colony stimulating factor 1 receptor                                                        | 0,774450853 | 9,079677032 | 77,0709853  | 3,71E-08 | 1,41E-06 |
| neuropilin 1                                                                                | 0,859587437 | 8,506920572 | 75,15212087 | 4,35E-08 | 1,59E-06 |
| microsomal glutathione S-transferase 1                                                      | 1,268251545 | 9,966886968 | 75,1161288  | 4,36E-08 | 1,59E-06 |
| sortilin 1                                                                                  | 0,96053715  | 10,28885274 | 73,64680534 | 4,93E-08 | 1,76E-06 |
| solute carrier family 4 (anion exchanger), member 8                                         | 0,80847017  | 6,002511762 | 72,56030277 | 5,41E-08 | 1,90E-06 |
| glycine C-acetyltransferase (2-amino-3-ketobutyrate-coenzyme A ligase)                      | 0,957555894 | 7,371706114 | 70,87411437 | 6,26E-08 | 2,15E-06 |
| Dnaj (Hsp40) homolog, subfamily C, member 15                                                | 0,741689394 | 10,41290483 | 70,52744607 | 6,46E-08 | 2,18E-06 |
| stearoyl-Coenzyme A desaturase 1                                                            | 0,778817848 | 9,284624334 | 68,99150264 | 7,40E-08 | 2,45E-06 |
| sortilin 1                                                                                  | 0,969678888 | 10,55334866 | 68,6882354  | 7,61E-08 | 2,47E-06 |
| cDNA sequence BC028528                                                                      | 0,956015822 | 9,982568803 | 68,48254092 | 7,75E-08 | 2,47E-06 |
| synaptopodin                                                                                | 0,763621317 | 6,805916958 | 66,21778217 | 9,54E-08 | 2,99E-06 |
| nucleoredoxin                                                                               | 0,808229473 | 7,787538949 | 65,66668363 | 1,00E-07 | 3,09E-06 |
| claudin 10                                                                                  | 0,876158191 | 9,809506488 | 63,27631585 | 1,26E-07 | 3,69E-06 |
| allograft inflammatory factor 1-like                                                        | 0,80363624  | 6,304024194 | 63,24882212 | 1,27E-07 | 3,69E-06 |
| lysozyme 2                                                                                  | 0,818953341 | 14,3136693  | 63,12109855 | 1,28E-07 | 3,69E-06 |
| RIKEN cDNA 9430038I01 gene                                                                  | 0,760717746 | 7,169853052 | 63,00532815 | 1,30E-07 | 3,69E-06 |
| ubiquitin-conjugating enzyme E2 Q2-like                                                     | 0,828340349 | 6,488308399 | 62,94510328 | 1,30E-07 | 3,69E-06 |
| ecotropic viral integration site 2a                                                         | 0,78290355  | 10,26851716 | 61,53123137 | 1,50E-07 | 4,17E-06 |
| peptidylprolyl isomerase C                                                                  | 1,121127648 | 8,163783586 | 60,56446953 | 1,65E-07 | 4,53E-06 |
| cDNA sequence BC028528                                                                      | 1,120812397 | 8,273458576 | 58,89331234 | 1,96E-07 | 5,29E-06 |
| G1 to S phase transition 2                                                                  | 0,754887093 | 6,785613435 | 57,97802215 | 2,16E-07 | 5,73E-06 |
| amylo-1,6-glucosidase, 4-alpha-glucanotransferase                                           | 0,828370468 | 7,509445244 | 56,92281042 | 2,41E-07 | 6,31E-06 |
| hydrogen voltage-gated channel 1                                                            | 1,121168652 | 10,33180665 | 56,77456894 | 2,45E-07 | 6,32E-06 |
| interferon gamma inducible protein 30                                                       | 0,760307323 | 10,95994566 | 56,29430715 | 2,58E-07 | 6,56E-06 |
| fatty acid desaturase 1                                                                     | 0,892771902 | 11,09526112 | 55,1020831  | 2,94E-07 | 7,36E-06 |
| ribosomal protein L3-like                                                                   | 1,024015606 | 8,951233702 | 54,84877248 | 3,02E-07 | 7,47E-06 |
| fibrosin-like 1                                                                             | 0,875015487 | 11,07419723 | 54,38594136 | 3,18E-07 | 7,74E-06 |
| tropomodulin 2                                                                              | 0,734967801 | 6,692063032 | 54,27862144 | 3,22E-07 | 7,74E-06 |
| tetratricopeptide repeat domain 3                                                           | 0,826041195 | 8,982028841 | 53,38810965 | 3,56E-07 | 8,36E-06 |
| ERO1-like beta (S. cerevisiae)                                                              | 0,775659102 | 7,930399321 | 53,34727082 | 3,58E-07 | 8,36E-06 |
| oligonucleotide/oligosaccharide-binding fold containing 2A                                  | 0,892115973 | 7,980224178 | 52,95841671 | 3,74E-07 | 8,54E-06 |
| colony stimulating factor 1 receptor                                                        | 0,92832173  | 6,479990888 | 52,93036617 | 3,75E-07 | 8,54E-06 |
| solute carrier family 25 (mitochondrial carrier, dicarboxylate transporter), member 10      | 0,842780014 | 7,8370523   | 52,50365679 | 3,94E-07 | 8,85E-06 |
| phosphatidic acid phosphatase type 2C                                                       | 0,824043354 | 9,855186619 | 52,21225997 | 4,07E-07 | 9,04E-06 |
| acetyl-Coenzyme A carboxylase alpha                                                         | 0,873697666 | 8,126383541 | 52,00606633 | 4,17E-07 | 9,14E-06 |
| PQ loop repeat containing 1                                                                 | 0,77266901  | 8,440502265 | 51,47820811 | 4,44E-07 | 9,60E-06 |
| RIKEN cDNA 2810025M15 gene                                                                  | 0,72304774  | 8,840085755 | 51,23838141 | 4,56E-07 | 9,64E-06 |
| embigin                                                                                     | 1,065577283 | 10,97708489 | 51,18633303 | 4,59E-07 | 9,64E-06 |
| toll-like receptor 7                                                                        | 0,621535619 | 7,305973023 | 51,13389066 | 4,62E-07 | 9,64E-06 |
| transmembrane protein 41a                                                                   | 0,759325453 | 6,774033984 | 50,88320534 | 4,76E-07 | 9,81E-06 |
| ATP-binding cassette, sub-family B (MDR/TAP), member 6                                      | 1,165519212 | 5,570827029 | 50,71329599 | 4,85E-07 | 9,89E-06 |
| colony stimulating factor 2 receptor, alpha, low-affinity (granulocyte-macrophage)          | 0,775869806 | 9,552755534 | 49,90489347 | 5,34E-07 | 1,08E-05 |
| tetraspanin 3                                                                               | 1,31515764  | 11,1113674  | 49,51869283 | 5,60E-07 | 1,12E-05 |
| lysophosphatidic acid receptor 3                                                            | 0,738335843 | 5,454874094 | 48,56463193 | 6,29E-07 | 1,24E-05 |
| START domain containing 7                                                                   | 0,797602552 | 9,357612096 | 47,49950723 | 7,18E-07 | 1,40E-05 |
| Gem-interacting protein                                                                     | 0,743037902 | 7,597150769 | 47,37681134 | 7,29E-07 | 1,40E-05 |
| synaptophysin-like protein                                                                  | 0,829063654 | 9,44482662  | 47,12049575 | 7,53E-07 | 1,44E-05 |
| claudin 10                                                                                  | 0,818716596 | 7,155772333 | 46,99655734 | 7,65E-07 | 1,44E-05 |
| cDNA sequence AB124611                                                                      | 0,649539346 | 6,148032022 | 46,7830188  | 7,86E-07 | 1,45E-05 |
| importin 13                                                                                 | 0,972876859 | 9,218717438 | 46,72514582 | 7,92E-07 | 1,45E-05 |
| DNA-damage regulated autophagy modulator 1                                                  | 1,030811487 | 9,488742342 | 46,68540508 | 7,96E-07 | 1,45E-05 |
| phospholipid scramblase 4                                                                   | 0,786983475 | 5,704130777 | 46,3191117  | 8,34E-07 | 1,50E-05 |
| apolipoprotein L 7c                                                                         | 1,221428173 | 11,77837867 | 46,29367485 | 8,37E-07 | 1,50E-05 |
| prostaglandin I receptor (IP)                                                               | 0,769396115 | 7,20760505  | 46,07229768 | 8,61E-07 | 1,52E-05 |
| family with sequence similarity 98, member C                                                | 0,777272425 | 9,888035932 | 45,79102567 | 8,93E-07 | 1,57E-05 |
| galactose-3-O-sulfotransferase 2                                                            | 1,141003026 | 7,870816139 | 45,64254956 | 9,10E-07 | 1,58E-05 |
| hydrogen voltage-gated channel 1                                                            | 0,97877551  | 10,77757132 | 45,06944769 | 9,81E-07 | 1,69E-05 |
| RIKEN cDNA 2510009E07 gene                                                                  | 0,66345507  | 9,276546244 | 44,75286519 | 1,02E-06 | 1,74E-05 |
| FYVE, RhoGEF and PH domain containing 2                                                     | 0,958077925 | 6,195992271 | 43,78449122 | 1,16E-06 | 1,96E-05 |
| non-metastatic cells 1, protein (NM23A) expressed in                                        | 0,917426002 | 11,52631594 | 43,35161051 | 1,23E-06 | 2,06E-05 |
| RIKEN cDNA 2310035K24 gene                                                                  | 0,805689371 | 8,049038815 | 43,24165289 | 1,25E-06 | 2,07E-05 |
| tetratricopeptide repeat domain 3                                                           | 0,795908504 | 9,19007804  | 42,2079618  | 1,44E-06 | 2,37E-05 |
| C-type lectin domain family 7, member a                                                     | 0,683288338 | 9,352555201 | 42,08816822 | 1,47E-06 | 2,37E-05 |
| ribonuclease, RNase A family 4                                                              | 1,145091268 | 5,906894595 | 41,9908178  | 1,49E-06 | 2,37E-05 |
| Dnaj (Hsp40) homolog, subfamily C, member 10                                                | 1,290249271 | 6,050064971 | 41,95861005 | 1,50E-06 | 2,37E-05 |
| phosphogluconate dehydrogenase                                                              | 1,157516063 | 12,29164985 | 41,93964062 | 1,50E-06 | 2,37E-05 |
| lipase, family member N                                                                     | 0,919413996 | 6,616090447 | 41,87415817 | 1,51E-06 | 2,37E-05 |
| a disintegrin and metallopeptidase domain 23                                                | 0,677914201 | 5,96924949  | 41,74616284 | 1,54E-06 | 2,39E-05 |
| Rho guanine nucleotide exchange factor (GEF) 3                                              | 0,898173848 | 9,850723742 | 41,63285077 | 1,56E-06 | 2,39E-05 |
| stromal cell-derived factor 2-like 1                                                        | 0,824911137 | 8,394542943 | 41,61625098 | 1,57E-06 | 2,39E-05 |
| solute carrier family 25 (mitochondrial carrier, palmitoylcarnitine transporter), member 29 | 0,838023663 | 5,638713331 | 41,41336009 | 1,61E-06 | 2,43E-05 |
| hydroxysteroid (17-beta) dehydrogenase 4                                                    | 0,772860142 | 11,59738908 | 41,17283399 | 1,67E-06 | 2,50E-05 |
| abhydrolase domain containing 12                                                            | 0,787350207 | 6,950750164 | 40,69411883 | 1,79E-06 | 2,63E-05 |
| FXD domain-containing ion transport regulator 2                                             | 0,992139587 | 7,250599219 | 40,67122857 | 1,79E-06 | 2,63E-05 |
| RIKEN cDNA 2510009E07 gene                                                                  | 0,682749769 | 7,313377904 | 40,65264107 | 1,80E-06 | 2,63E-05 |

|                                                                                               |             |             |              |          |          |
|-----------------------------------------------------------------------------------------------|-------------|-------------|--------------|----------|----------|
| poly(A) polymerase gamma                                                                      | 0,938437607 | 8,618570359 | 40,32844385  | 1,88E-06 | 2,73E-05 |
| spermatid perinuclear RNA binding protein                                                     | 0,746350695 | 6,216158511 | 40,23640992  | 1,91E-06 | 2,74E-05 |
| RIKEN cDNA 0910001L09 gene                                                                    | 1,112689344 | 11,20746955 | 40,12601392  | 1,94E-06 | 2,77E-05 |
| grancalcin                                                                                    | 0,740119819 | 6,621085967 | 39,97254907  | 1,98E-06 | 2,81E-05 |
| adenosine kinase                                                                              | 0,745362931 | 6,271709024 | 39,85395197  | 2,02E-06 | 2,83E-05 |
| Rho guanine nucleotide exchange factor (GEF) 4                                                | 0,790465183 | 6,051628344 | 39,58217251  | 2,10E-06 | 2,92E-05 |
| vaccinia related kinase 2                                                                     | 0,841816661 | 7,41928932  | 39,54578538  | 2,11E-06 | 2,92E-05 |
| tetratricopeptide repeat domain 3                                                             | 0,895036471 | 10,01414354 | 39,44470177  | 2,14E-06 | 2,94E-05 |
| 1-acylglycerol-3-phosphate O-acyltransferase 4 (lysophosphatidic acid acyltransferase, delta) | 1,256700876 | 8,04096607  | 39,04310721  | 2,28E-06 | 3,09E-05 |
| BCL2-like 14 (apoptosis facilitator)                                                          | 0,947861041 | 6,353742029 | 38,79659736  | 2,36E-06 | 3,18E-05 |
| ArfGAP with coiled-coil, ankyrin repeat and PH domains 3                                      | 0,815814935 | 6,32382047  | 38,71427908  | 2,39E-06 | 3,20E-05 |
| sorbitol dehydrogenase                                                                        | 0,999315852 | 5,534606902 | 38,39221483  | 2,51E-06 | 3,33E-05 |
| transaldolase 1                                                                               | 0,894310868 | 12,69510638 | 37,83185174  | 2,73E-06 | 3,60E-05 |
| aryl-hydrocarbon receptor repressor                                                           | 1,107589552 | 7,725699108 | 37,69257905  | 2,79E-06 | 3,64E-05 |
| histocompatibility 2, class II antigen E beta2                                                | 1,31480562  | 7,304406739 | 37,58549667  | 2,84E-06 | 3,64E-05 |
| neuron navigator 1                                                                            | 0,824338846 | 9,091404252 | 37,57016821  | 2,84E-06 | 3,64E-05 |
| solute carrier family 22 (organic cation transporter), member 18                              | 1,066914256 | 6,221663263 | 37,5622051   | 2,85E-06 | 3,64E-05 |
| 3'-phosphoadenosine 5'-phosphosulfate synthase 2                                              | 0,851884453 | 6,727493485 | 37,46897238  | 2,89E-06 | 3,67E-05 |
| dual specificity phosphatase 23                                                               | 0,801564177 | 7,733557753 | 37,3714501   | 2,93E-06 | 3,70E-05 |
| RAB38, member of RAS oncogene family                                                          | 0,877452322 | 5,809269489 | 37,1926996   | 3,01E-06 | 3,72E-05 |
| Fas (TNF receptor superfamily member 6)                                                       | 0,937636936 | 8,063782592 | 37,18077949  | 3,02E-06 | 3,72E-05 |
| actin, alpha 2, smooth muscle, aorta                                                          | 0,658341665 | 7,247277944 | 37,17142198  | 3,02E-06 | 3,72E-05 |
| mitogen-activated protein kinase associated protein 1                                         | 0,92655924  | 10,13932498 | 37,14948637  | 3,03E-06 | 3,72E-05 |
| potassium voltage-gated channel, shaker-related subfamily, beta member 2                      | 0,855140113 | 9,699223168 | 37,04410082  | 3,08E-06 | 3,75E-05 |
| tumor suppressor candidate 1                                                                  | 0,921046392 | 9,617020742 | 36,7513244   | 3,23E-06 | 3,88E-05 |
| phosphate cytidylyltransferase 2, ethanolamine                                                | 1,013361747 | 6,308396878 | 36,73260558  | 3,24E-06 | 3,88E-05 |
| ribonuclease, RNase A family, 6                                                               | 1,043395908 | 5,538304768 | 36,69480312  | 3,26E-06 | 3,88E-05 |
| guanylate cyclase activator 1a (retina)                                                       | 1,194600877 | 8,15975834  | 36,63129888  | 3,29E-06 | 3,90E-05 |
| RIKEN cDNA 6030429G01 gene                                                                    | 0,851655945 | 7,770487494 | 36,3666153   | 3,43E-06 | 4,03E-05 |
| Dnaj (Hsp40) homolog, subfamily C, member 10                                                  | 1,241019513 | 10,56588942 | 36,24670994  | 3,49E-06 | 4,06E-05 |
| RIKEN cDNA 2610528A11 gene                                                                    | 0,650398291 | 6,910321812 | 36,23446264  | 3,50E-06 | 4,06E-05 |
| interleukin 28 receptor alpha                                                                 | 0,811080251 | 6,747866608 | 36,18269551  | 3,53E-06 | 4,07E-05 |
| phosphatidylinositol 4-kinase, catalytic, alpha polypeptide                                   | 0,772164825 | 10,54265282 | 36,03739118  | 3,61E-06 | 4,14E-05 |
| adenine phosphoribosyl transferase                                                            | 0,885365711 | 11,16387768 | 35,02672542  | 3,68E-06 | 4,18E-05 |
| predicted gene 11818                                                                          | 0,906298312 | 5,857815898 | 35,88641835  | 3,70E-06 | 4,18E-05 |
| hexose-6-phosphate dehydrogenase (glucose 1-dehydrogenase)                                    | 1,064718886 | 7,351485869 | 35,75765702  | 3,78E-06 | 4,24E-05 |
| S-adenosylhomocysteine hydrolase-like 2                                                       | 0,793190984 | 7,574898756 | 35,600491375 | 3,87E-06 | 4,32E-05 |
| mitogen-activated protein kinase associated protein 1                                         | 0,838979842 | 9,896770972 | 35,30011106  | 4,07E-06 | 4,51E-05 |
| cadherin-related family member 1                                                              | 0,639850311 | 5,725757351 | 35,24250921  | 4,10E-06 | 4,52E-05 |
| transmembrane 4 superfamily member 5                                                          | 0,744343997 | 6,109196402 | 35,15001416  | 4,17E-06 | 4,56E-05 |
| serum/glucocorticoid regulated kinase 3                                                       | 0,781666103 | 6,303242477 | 35,09529151  | 4,20E-06 | 4,58E-05 |
| fermitin family homolog 3 (Drosophila)                                                        | 0,918363619 | 7,956653369 | 35,02678341  | 4,25E-06 | 4,59E-05 |
| LON peptidase N-terminal domain and ring finger 3                                             | 0,747336433 | 6,82036887  | 35,00062033  | 4,27E-06 | 4,59E-05 |
| calcium and integrin binding family member 2                                                  | 0,753360828 | 5,494431855 | 34,60895139  | 4,55E-06 | 4,86E-05 |
| histocompatibility 13                                                                         | 1,052755832 | 7,785409183 | 34,54363704  | 4,60E-06 | 4,89E-05 |
| monocyte to macrophage differentiation-associated                                             | 0,801906285 | 10,96262758 | 34,42387777  | 4,69E-06 | 4,96E-05 |
| RIKEN cDNA 6720456B07 gene                                                                    | 0,791545768 | 12,33495688 | 34,33000378  | 4,77E-06 | 5,00E-05 |
| cDNA sequence BC024659                                                                        | 0,746897234 | 5,862850248 | 34,24795307  | 4,83E-06 | 5,04E-05 |
| liver glycogen phosphorylase                                                                  | 0,863919202 | 9,160053523 | 34,1589617   | 4,90E-06 | 5,09E-05 |
| hematopoietically expressed homeobox                                                          | 0,855765956 | 6,954330389 | 34,1229339   | 4,93E-06 | 5,09E-05 |
| LIM-domain containing, protein kinase                                                         | 0,830106684 | 7,130704396 | 34,00119879  | 5,03E-06 | 5,16E-05 |
| Kruppel-like factor 2 (lung)                                                                  | 0,744319111 | 5,662739332 | 33,8999044   | 5,12E-06 | 5,22E-05 |
| ring finger protein 128                                                                       | 0,818762029 | 5,688021752 | 33,78199485  | 5,22E-06 | 5,29E-05 |
| adenosine kinase                                                                              | 0,649973912 | 7,141886566 | 33,47784864  | 5,50E-06 | 5,54E-05 |
| Ras-related associated with diabetes                                                          | 0,876766915 | 6,688487232 | 33,40814355  | 5,56E-06 | 5,57E-05 |
| glucuronidase, beta                                                                           | 0,719361808 | 8,941175518 | 33,29588425  | 5,67E-06 | 5,60E-05 |
| tetraspanin 4                                                                                 | 0,724223863 | 6,066280924 | 33,28772587  | 5,68E-06 | 5,60E-05 |
| SFFV proviral integration 1                                                                   | 0,85471997  | 6,682451597 | 33,2772785   | 5,69E-06 | 5,60E-05 |
| per-pentamer repeat gene                                                                      | 0,794853921 | 5,909012661 | 33,16678825  | 5,79E-06 | 5,67E-05 |
| zinc finger protein 296                                                                       | 0,827043665 | 6,255661991 | 33,1002222   | 5,86E-06 | 5,71E-05 |
| predicted gene 5590                                                                           | 0,703383006 | 6,995517639 | 32,97977227  | 5,98E-06 | 5,79E-05 |
| emopamil binding protein-like                                                                 | 1,097424993 | 9,045231215 | 32,88085758  | 6,09E-06 | 5,86E-05 |
| epithelial membrane protein 3                                                                 | 0,810385498 | 11,41826941 | 32,80043358  | 6,17E-06 | 5,91E-05 |
| consortin, connexin sorting protein                                                           | 0,799350864 | 7,107420773 | 32,75936038  | 6,21E-06 | 5,92E-05 |
| progesterin and adipoQ receptor family member VII                                             | 0,669448427 | 6,170493389 | 32,23466427  | 6,81E-06 | 6,45E-05 |
| transmembrane channel-like gene family 6                                                      | 0,764849164 | 7,198208878 | 32,10612607  | 6,96E-06 | 6,56E-05 |
| abhydrolase domain containing 5                                                               | 0,73996102  | 7,119826782 | 31,84523221  | 7,29E-06 | 6,81E-05 |
| glucuronidase, beta                                                                           | 0,886689897 | 12,13095234 | 31,83250548  | 7,30E-06 | 6,81E-05 |
| brain-specific angiogenesis inhibitor 1-associated protein 2                                  | 0,806572755 | 6,501811072 | 31,78808816  | 7,36E-06 | 6,83E-05 |
| isovaleryl coenzyme A dehydrogenase                                                           | 0,839199146 | 8,152980449 | 31,5813117   | 7,63E-06 | 7,04E-05 |
| UDP-GlcNAc:betaGal beta-1,3-N-acetylglucosaminyltransferase 5                                 | 0,895465436 | 8,850451559 | 31,50716263  | 7,74E-06 | 7,10E-05 |
| ferric-chelate reductase 1                                                                    | 0,805395809 | 7,88979539  | 31,34948108  | 7,96E-06 | 7,26E-05 |
| aldo-keto reductase family 1, member A4 (aldehyde reductase)                                  | 0,995583808 | 13,70432232 | 31,26623133  | 8,08E-06 | 7,34E-05 |
| guanidinoacetate methyltransferase                                                            | 0,857723972 | 6,481856757 | 31,1822591   | 8,20E-06 | 7,41E-05 |
| selenoprotein X 1                                                                             | 0,869353356 | 9,056304523 | 31,10140805  | 8,32E-06 | 7,48E-05 |
| LAG1 homolog, ceramide synthase 2                                                             | 0,767384729 | 10,67568423 | 31,06647211  | 8,37E-06 | 7,49E-05 |
| major facilitator superfamily domain containing 7B                                            | 0,804596243 | 10,37672705 | 30,92126318  | 8,59E-06 | 7,65E-05 |
| tetratricopeptide repeat domain 39A                                                           | 0,808962973 | 6,136963675 | 30,83096755  | 8,73E-06 | 7,71E-05 |
| dolichyl-phosphate (UDP-N-acetylglucosamine) acetylglucosaminophosphotransferase 1 (GlcNAc-1- | 0,93606604  | 10,39961065 | 30,82120577  | 8,75E-06 | 7,71E-05 |
| glutaminy-peptide cyclotransferase (glutaminy cyclase)                                        | 0,936211425 | 6,851619442 | 30,7892542   | 8,80E-06 | 7,71E-05 |
| aldo-keto reductase family 1, member A4 (aldehyde reductase)                                  | 0,892713378 | 12,84146372 | 30,58538197  | 9,13E-06 | 7,96E-05 |

|                                                                                             |             |             |             |          |             |
|---------------------------------------------------------------------------------------------|-------------|-------------|-------------|----------|-------------|
| cell division cycle associated 8                                                            | 0,710738997 | 7,079085293 | 30,486516   | 9,30E-06 | 8,06E-05    |
| zinc finger protein 296                                                                     | 0,816620005 | 7,289430527 | 30,46561666 | 9,33E-06 | 8,06E-05    |
| vacuolar protein sorting 13B (yeast)                                                        | 0,756772914 | 8,43605866  | 30,37910117 | 9,48E-06 | 8,15E-05    |
| ribosomal protein S6 kinase polypeptide 1                                                   | 1,016055172 | 10,1408866  | 30,27190347 | 9,67E-06 | 8,27E-05    |
| endothelin converting enzyme 2                                                              | 0,749010634 | 6,990493529 | 30,2421356  | 9,72E-06 | 8,28E-05    |
| spermidine synthase                                                                         | 1,000125152 | 7,189285544 | 30,06008603 | 1,01E-05 | 8,52E-05    |
| HtrA serine peptidase 2                                                                     | 1,002916682 | 9,657469747 | 29,5950603  | 1,10E-05 | 9,24E-05    |
| family with sequence similarity 98, member C                                                | 0,773101754 | 6,322500581 | 29,53070834 | 1,11E-05 | 9,31E-05    |
| phosphatidylinositol glycan anchor biosynthesis, class Z                                    | 1,043092709 | 6,030778961 | 29,32478939 | 1,15E-05 | 9,63E-05    |
| FCH domain only 1                                                                           | 1,018600079 | 8,277875656 | 29,24703502 | 1,17E-05 | 9,73E-05    |
| sphingosine-1-phosphate receptor 2                                                          | 0,848801718 | 10,24892686 | 29,04510497 | 1,22E-05 | 0,000100582 |
| endonuclease/exonuclease/phosphatase family domain containing 1                             | 0,651334131 | 5,996957327 | 28,91634975 | 1,25E-05 | 0,000102594 |
| B-cell receptor-associated protein 29                                                       | 0,925857069 | 9,206397323 | 28,87498186 | 1,26E-05 | 0,000102924 |
| signal peptidase complex subunit 3 homolog (S. cerevisiae)                                  | 0,818246647 | 8,578727958 | 28,81946708 | 1,27E-05 | 0,000103538 |
| translocase of outer mitochondrial membrane 40 homolog-like (yeast)                         | 0,770860064 | 8,927770077 | 28,72996261 | 1,29E-05 | 0,00010484  |
| myosin VA                                                                                   | 0,82187582  | 7,512732506 | 28,64862326 | 1,31E-05 | 0,000106    |
| prenylcysteine oxidase 1                                                                    | 0,746923026 | 9,065522249 | 28,59766647 | 1,33E-05 | 0,000106553 |
| translocating chain-associating membrane protein 1                                          | 0,865097453 | 10,36291311 | 28,47658199 | 1,36E-05 | 0,000108571 |
| C-type lectin domain family 4, member d                                                     | 1,328361925 | 12,31133208 | 28,3896381  | 1,38E-05 | 0,000109296 |
| lysine (K)-specific demethylase 6A                                                          | 0,79735804  | 8,879966143 | 28,348026   | 1,39E-05 | 0,000109296 |
| serum/glucocorticoid regulated kinase 1                                                     | 0,749448034 | 12,55421653 | 28,34089011 | 1,39E-05 | 0,000109296 |
| zinc finger, MIZ-type containing 2                                                          | 0,714327742 | 8,466114078 | 28,33443179 | 1,39E-05 | 0,000109296 |
| calcium/calmodulin-dependent serine protein kinase (MAGUK family)                           | 0,752153491 | 7,817056778 | 28,32553832 | 1,40E-05 | 0,000109296 |
| protein arginine N-methyltransferase 3                                                      | 0,879271038 | 8,885350376 | 28,17554287 | 1,44E-05 | 0,00011203  |
| high mobility group nucleosomal binding domain 3                                            | 0,994917611 | 12,10459754 | 28,08686252 | 1,46E-05 | 0,00011348  |
| family with sequence similarity 89, member B                                                | 0,736093468 | 9,06553139  | 28,03711998 | 1,48E-05 | 0,000114084 |
| ribose 5-phosphate isomerase A                                                              | 1,020458589 | 6,902413409 | 27,88568353 | 1,52E-05 | 0,000117005 |
| kinesin family member 2A                                                                    | 1,24772474  | 7,450010018 | 27,86161297 | 1,53E-05 | 0,000117046 |
| DDRGK domain containing 1                                                                   | 0,757391922 | 7,041138935 | 27,82909549 | 1,54E-05 | 0,000117285 |
| regulatory associated protein of MTOR, complex 1                                            | 0,867811441 | 9,630674067 | 27,64373263 | 1,60E-05 | 0,00012064  |
| pseudouridylate synthase-like 1                                                             | 0,807416308 | 6,689251317 | 27,60842376 | 1,61E-05 | 0,00012064  |
| lysozyme 1                                                                                  | 0,853442909 | 12,30406594 | 27,59954774 | 1,61E-05 | 0,00012064  |
| ubiquitin-like modifier activating enzyme 7                                                 | 0,829465159 | 10,38658676 | 27,59884293 | 1,61E-05 | 0,00012064  |
| tetratricopeptide repeat domain 35                                                          | 1,064755729 | 10,63623131 | 27,53676402 | 1,63E-05 | 0,000121004 |
| solute carrier family 25, member 45                                                         | 1,002089869 | 9,749339428 | 27,52632587 | 1,63E-05 | 0,000121004 |
| transmembrane and coiled coil domains 1                                                     | 0,914611179 | 7,967319607 | 27,51940013 | 1,64E-05 | 0,000121004 |
| lymphocyte antigen 9                                                                        | 1,448842124 | 7,963359493 | 27,47163278 | 1,65E-05 | 0,000121634 |
| steroid 5 alpha-reductase 3                                                                 | 0,934376546 | 9,15836329  | 27,45100947 | 1,66E-05 | 0,000121634 |
| family with sequence similarity 111, member A                                               | 0,856692263 | 7,174419762 | 27,40642312 | 1,67E-05 | 0,000122206 |
| 4-nitrophenylphosphatase domain and non-neuronal SNAP25-like protein homolog 1 (C. elegans) | 0,942204392 | 7,96932117  | 27,2786877  | 1,72E-05 | 0,000124841 |
| vaccinia related kinase 2                                                                   | 1,030685785 | 6,883202429 | 27,21559609 | 1,74E-05 | 0,000125905 |
| Rab interacting lysosomal protein                                                           | 0,873511052 | 6,471647096 | 26,93852838 | 1,84E-05 | 0,000132036 |
| Nfat activating molecule with ITAM motif 1                                                  | 1,113641083 | 5,75901156  | 26,9273048  | 1,84E-05 | 0,000132036 |
| synaptophysin-like protein                                                                  | 1,006489624 | 9,102028733 | 26,91798453 | 1,85E-05 | 0,000132036 |
| KN motif and ankyrin repeat domains 3                                                       | 0,841829118 | 7,009494237 | 26,65823359 | 1,95E-05 | 0,000138613 |
| testis specific protein kinase 1                                                            | 0,821948907 | 8,922310585 | 26,56654134 | 1,98E-05 | 0,000140657 |
| a disintegrin and metallopeptidase domain 11                                                | 0,790546125 | 5,23613824  | 26,43282326 | 2,04E-05 | 0,000143975 |
| nurim (nuclear envelope membrane protein)                                                   | 0,717799345 | 5,946643847 | 26,1105601  | 2,18E-05 | 0,000153239 |
| ring finger protein 130                                                                     | 0,836307327 | 10,9645819  | 26,02780526 | 2,21E-05 | 0,000155267 |
| C2 calcium-dependent domain containing 2                                                    | 0,867740442 | 6,379645887 | 25,94140079 | 2,25E-05 | 0,000156956 |
| heat shock protein, alpha-crystallin-related, B6                                            | 0,922950473 | 10,18264233 | 25,93738781 | 2,26E-05 | 0,000156956 |
| thioredoxin-related transmembrane protein 4                                                 | 0,767954863 | 8,230015056 | 25,77157479 | 2,34E-05 | 0,000161838 |
| diacylglycerol kinase, gamma                                                                | 0,869085926 | 5,313355026 | 25,73321584 | 2,35E-05 | 0,000162435 |
| C2 calcium-dependent domain containing 2-like                                               | 0,897613793 | 8,185969171 | 25,71639837 | 2,36E-05 | 0,000162435 |
| cytochrome b, ascorbate dependent 3                                                         | 0,790834944 | 7,731704153 | 25,69576456 | 2,37E-05 | 0,000162501 |
| succinate dehydrogenase complex assembly factor 1                                           | 0,883774671 | 9,405734489 | 25,63506845 | 2,40E-05 | 0,000163944 |
| sprouty homolog 3 (Drosophila)                                                              | 0,808787809 | 4,948263649 | 25,51217439 | 2,47E-05 | 0,000167587 |
| family with sequence similarity 195, member A                                               | 0,983216774 | 5,584436385 | 25,46240667 | 2,49E-05 | 0,000168702 |
| RIKEN cDNA 1810014F10 gene                                                                  | 0,915067671 | 6,993140586 | 25,32756703 | 2,56E-05 | 0,000172382 |
| regulator of G-protein signaling 12                                                         | 0,778070868 | 6,865473138 | 25,32409132 | 2,57E-05 | 0,000172382 |
| ring finger protein 19A                                                                     | 0,872630657 | 10,27220065 | 25,29493567 | 2,58E-05 | 0,000172606 |
| polymerase (DNA directed), delta 1, catalytic subunit                                       | 0,76561301  | 8,600313368 | 25,28198696 | 2,59E-05 | 0,000172606 |
| differentially expressed in B16F10 1                                                        | 0,893866499 | 10,12947999 | 25,23245865 | 2,62E-05 | 0,000173183 |
| G protein-coupled receptor 89                                                               | 0,73014319  | 6,638956697 | 25,23062963 | 2,62E-05 | 0,000173183 |
| general transcription factor II H, polypeptide 2                                            | 0,782698648 | 9,353723297 | 25,15641474 | 2,66E-05 | 0,00017528  |
| lysophosphatidylcholine acyltransferase 2                                                   | 1,077548042 | 6,760948101 | 25,11502372 | 2,68E-05 | 0,000175701 |
| GRIP1 associated protein 1                                                                  | 0,787953691 | 6,97090665  | 25,11005336 | 2,69E-05 | 0,000175701 |
| RIKEN cDNA 1110021J02 gene                                                                  | 1,319328144 | 6,656113243 | 24,85171517 | 2,84E-05 | 0,000185015 |
| high mobility group nucleosomal binding domain 3                                            | 1,070243012 | 11,85314943 | 24,75384872 | 2,90E-05 | 0,00018826  |
| RIKEN cDNA 1110002B05 gene                                                                  | 0,861894038 | 9,898001722 | 24,70724365 | 2,93E-05 | 0,000188443 |
| transmembrane protein 63a                                                                   | 0,865050115 | 6,802607807 | 24,68763602 | 2,94E-05 | 0,000188443 |
| retinoblastoma 1                                                                            | 0,768589325 | 7,411208597 | 24,68606203 | 2,94E-05 | 0,000188443 |
| integrin beta 2                                                                             | 0,874978194 | 7,417373374 | 24,67382873 | 2,95E-05 | 0,000188443 |
| P450 (cytochrome) oxidoreductase                                                            | 0,860823466 | 8,025057878 | 24,66450137 | 2,96E-05 | 0,000188443 |
| ATP-binding cassette, sub-family D (ALD), member 1                                          | 0,80823331  | 6,847990662 | 24,62353267 | 2,98E-05 | 0,000189431 |
| ecotropic viral integration site 2a                                                         | 0,678240991 | 8,116637216 | 24,60691112 | 2,99E-05 | 0,000189431 |
| sorting nexin family member 30                                                              | 0,810660128 | 6,106449172 | 24,569218   | 3,02E-05 | 0,000189888 |
| NAD kinase                                                                                  | 1,099751715 | 9,681519862 | 24,56267435 | 3,02E-05 | 0,000189888 |
| nuclear receptor coactivator 4                                                              | 0,833915195 | 7,824231268 | 24,4996876  | 3,06E-05 | 0,000191819 |
| SRY-box containing gene 4                                                                   | 0,647763637 | 6,540523679 | 24,43447913 | 3,11E-05 | 0,000193871 |
| doublesex and mab-3 related transcription factor like family A2                             | 0,730023382 | 6,829156231 | 24,40155497 | 3,13E-05 | 0,000194251 |

|                                                                              |             |             |              |          |             |
|------------------------------------------------------------------------------|-------------|-------------|--------------|----------|-------------|
| vesicle-associated membrane protein 8                                        | 0,896720578 | 11,32803225 | 24,3682774   | 3,15E-05 | 0,000194251 |
| RIKEN cDNA 4930579G24 gene                                                   | 1,005880294 | 6,489648477 | 24,35172517  | 3,16E-05 | 0,000194251 |
| GLI pathogenesis-related 1 (glioma)                                          | 0,970390328 | 11,67784635 | 24,34699741  | 3,17E-05 | 0,000194251 |
| translocase of inner mitochondrial membrane 8 homolog a1 (yeast)             | 0,799400485 | 8,334374992 | 24,3447812   | 3,17E-05 | 0,000194251 |
| feline sarcoma oncogene                                                      | 0,705282126 | 9,172117662 | 24,29228386  | 3,21E-05 | 0,000195094 |
| prolylcarboxypeptidase (angiotensinase C)                                    | 0,956688595 | 11,13313754 | 24,28410441  | 3,21E-05 | 0,000195094 |
| SH2B adaptor protein 3                                                       | 0,851177198 | 9,296198291 | 24,26454648  | 3,23E-05 | 0,000195094 |
| acyl-CoA synthetase short-chain family member 1                              | 0,835822522 | 9,397830709 | 24,26159927  | 3,23E-05 | 0,000195094 |
| Sad1 and UNC84 domain containing 2                                           | 0,807743134 | 10,12765704 | 24,16368357  | 3,30E-05 | 0,00019865  |
| expressed sequence AI413582                                                  | 0,884881498 | 8,820721044 | 24,0530126   | 3,38E-05 | 0,000202858 |
| ligase III, DNA, ATP-dependent                                               | 0,852275109 | 6,718110219 | 24,02817664  | 3,40E-05 | 0,000203278 |
| retinoblastoma binding protein 7                                             | 0,788686077 | 9,204097512 | 23,9923648   | 3,42E-05 | 0,000204197 |
| polyamine oxidase (exo-N4-amino)                                             | 0,768478876 | 8,654632471 | 23,94338522  | 3,46E-05 | 0,000205724 |
| solute carrier family 5 (sodium-dependent vitamin transporter), member 6     | 0,860638401 | 7,461865888 | 23,8433699   | 3,54E-05 | 0,000209297 |
| eukaryotic translation initiation factor 4, gamma 2                          | 0,885152772 | 8,053366273 | 23,83537908  | 3,55E-05 | 0,000209297 |
| family with sequence similarity 89, member B                                 | 0,746617789 | 6,796003145 | 23,77420624  | 3,59E-05 | 0,000210642 |
| solute carrier family 6 (neurotransmitter transporter, creatine), member 8   | 0,730378362 | 8,554871688 | 23,76589809  | 3,60E-05 | 0,000210642 |
| predicted gene 962                                                           | 0,876942017 | 7,517277791 | 23,76146099  | 3,60E-05 | 0,000210642 |
| zinc binding alcohol dehydrogenase, domain containing 2                      | 1,210699087 | 7,999387896 | 23,55031418  | 3,78E-05 | 0,000220087 |
| interleukin 28 receptor alpha                                                | 0,889170675 | 5,670278742 | 23,5144882   | 3,81E-05 | 0,000220087 |
| zinc finger protein 524                                                      | 0,772277391 | 8,161855312 | 23,50298323  | 3,82E-05 | 0,000220087 |
| N-acetylglucosamine-1-phosphotransferase, gamma subunit                      | 0,769067587 | 9,633715352 | 23,49052446  | 3,83E-05 | 0,000220087 |
| neural precursor cell expressed, developmentally down-regulated gene 4-like  | 1,129597341 | 9,378061247 | 23,4790022   | 3,84E-05 | 0,000220087 |
| sperm antigen with calponin homology and coiled-coil domains 1               | 0,829711664 | 9,152271355 | 23,47716729  | 3,84E-05 | 0,000220087 |
| CD37 antigen                                                                 | 0,668265549 | 6,287858063 | 23,4340119   | 3,88E-05 | 0,000221512 |
| tetraspanin 17                                                               | 0,785979402 | 8,730272971 | 23,41641855  | 3,89E-05 | 0,00022167  |
| hydroxy-delta-5-steroid dehydrogenase, 3 beta- and steroid delta-isomerase 7 | 0,902933582 | 11,54864508 | 23,39117121  | 3,92E-05 | 0,000222215 |
| calreticulin                                                                 | 0,83181836  | 8,345409178 | 23,32972359  | 3,97E-05 | 0,000224594 |
| ribosomal protein S6 kinase polypeptide 1                                    | 0,800921018 | 5,38016671  | 23,29292358  | 4,00E-05 | 0,000225743 |
| ubiquitin-conjugating enzyme E2L 3                                           | 0,783224336 | 11,63639062 | 23,22946607  | 4,06E-05 | 0,000228279 |
| B-cell receptor-associated protein 29                                        | 0,929336873 | 8,458201551 | 23,16214153  | 4,13E-05 | 0,000230953 |
| potassium inwardly-rectifying channel, subfamily K, member 6                 | 0,883457519 | 11,68320276 | 23,15006341  | 4,14E-05 | 0,000230953 |
| retinoblastoma binding protein 7                                             | 0,813011302 | 8,72863     | 23,1188375   | 4,17E-05 | 0,000231862 |
| proline-serine-threonine phosphatase-interacting protein 1                   | 0,797199574 | 7,306867239 | 22,90007305  | 4,38E-05 | 0,000242976 |
| extended synaptotagmin-like protein 1                                        | 0,735294759 | 10,79950958 | 22,87302099  | 4,41E-05 | 0,000243718 |
| phosphatidylinositol 3 kinase, regulatory subunit, polypeptide 3 (p55)       | 0,792116026 | 5,642480968 | 22,76051298  | 4,52E-05 | 0,000249321 |
| transmembrane protein 48                                                     | 0,982276206 | 6,06254197  | 22,74588383  | 4,54E-05 | 0,000249379 |
| Grb2-binding adaptor, transmembrane                                          | 0,896583927 | 5,814083267 | 22,68725493  | 4,60E-05 | 0,000251986 |
| hydroxypyruvate isomerase homolog (E. coli)                                  | 0,854202967 | 7,628374965 | 22,63661963  | 4,65E-05 | 0,00025416  |
| cytochrome b5 reductase-like                                                 | 1,039733566 | 5,081644753 | 22,60708664  | 4,69E-05 | 0,000255109 |
| transmembrane protein 38B                                                    | 0,775360264 | 8,556063589 | 22,53291007  | 4,77E-05 | 0,000258732 |
| tetratricopeptide repeat domain 3                                            | 0,806019885 | 9,428455583 | 22,48173911  | 4,82E-05 | 0,00026102  |
| CKLF-like MARVEL transmembrane domain containing 8                           | 1,165310428 | 5,114063676 | 22,44674632  | 4,86E-05 | 0,000262345 |
| ArfGAP with RhoGAP domain, ankyrin repeat and PH domain 1                    | 0,837880371 | 6,121432548 | 22,36484878  | 4,96E-05 | 0,000266585 |
| plasminogen activator, urokinase receptor                                    | 0,830157259 | 7,729574718 | 22,34526383  | 4,98E-05 | 0,000266988 |
| protein arginine N-methyltransferase 7                                       | 0,887683759 | 8,048967518 | 22,28559331  | 5,05E-05 | 0,000269916 |
| family with sequence similarity 108, member A                                | 0,782245626 | 9,393872663 | 22,09690606  | 5,28E-05 | 0,000281295 |
| glucose-6-phosphate dehydrogenase X-linked                                   | 0,992754026 | 8,707836251 | 22,05914637  | 5,33E-05 | 0,000282952 |
| ribosomal protein L27A                                                       | 0,822584578 | 8,955672499 | 22,01908315  | 5,38E-05 | 0,000284779 |
| TM2 domain containing 2                                                      | 0,932843835 | 9,923344882 | 21,9946417   | 5,41E-05 | 0,000285567 |
| RIKEN cDNA 1810062O18 gene                                                   | 0,940603831 | 6,098178371 | 21,93525286  | 5,48E-05 | 0,000288742 |
| RIKEN cDNA 2010111I01 gene                                                   | 1,298267262 | 6,895609582 | 21,79460169  | 5,67E-05 | 0,000297555 |
| death-associated protein                                                     | 0,99060462  | 8,182168021 | 21,78357962  | 5,69E-05 | 0,000297555 |
| neuralized-like 2 (Drosophila)                                               | 0,687522354 | 5,773792831 | 21,76444534  | 5,71E-05 | 0,000298026 |
| required for meiotic nuclear division 5 homolog A (S. cerevisiae)            | 0,766178657 | 10,76045654 | 21,64258319  | 5,88E-05 | 0,000305187 |
| family with sequence similarity 20, member C                                 | 0,902853048 | 6,666117414 | 21,64026711  | 5,88E-05 | 0,000305187 |
| B-cell leukemia/lymphoma 6                                                   | 0,898479748 | 10,74751698 | 21,60080903  | 5,94E-05 | 0,000306596 |
| T-cell, immune regulator 1, ATPase, H+ transporting, lysosomal V0 protein A3 | 0,730306593 | 7,136035251 | 21,5964312   | 5,95E-05 | 0,000306596 |
| Yip1 interacting factor homolog B (S. cerevisiae)                            | 1,031136633 | 9,734531142 | 21,52798072  | 6,05E-05 | 0,000310764 |
| glycogenin                                                                   | 1,061137737 | 9,177642764 | 21,5058744   | 6,08E-05 | 0,000311508 |
| RIKEN cDNA 6720456B07 gene                                                   | 0,887142071 | 12,37853029 | 21,48580678  | 6,11E-05 | 0,000312104 |
| IQ motif containing GTPase activating protein 2                              | 0,742689054 | 5,088960904 | 21,44092764  | 6,17E-05 | 0,000314581 |
| predicted gene 11696                                                         | 0,756352132 | 6,216940405 | 21,17547287  | 6,58E-05 | 0,000334039 |
| syndecan 2                                                                   | 0,723609048 | 5,169321789 | 21,165033296 | 6,60E-05 | 0,000334039 |
| cysteinyl leukotriene receptor 1                                             | 1,024574407 | 5,656637718 | 21,15754827  | 6,61E-05 | 0,000334039 |
| Fanconi anemia, complementation group L                                      | 1,007711782 | 6,056993206 | 21,13977214  | 6,64E-05 | 0,000334525 |
| START domain containing 7                                                    | 1,004221573 | 8,836798985 | 21,09901506  | 6,71E-05 | 0,000336901 |
| KCNQ1 overlapping transcript 1                                               | 0,705794294 | 7,737014101 | 21,01842195  | 6,84E-05 | 0,000342624 |
| ribosomal protein S6 kinase, polypeptide 5                                   | 0,754067025 | 8,175114454 | 20,98958386  | 6,89E-05 | 0,00034407  |
| steroid 5 alpha-reductase 3                                                  | 1,049296409 | 8,971626952 | 20,94441461  | 6,97E-05 | 0,000346916 |
| serum/glucocorticoid regulated kinase 3                                      | 0,815125278 | 6,552008095 | 20,92706792  | 7,00E-05 | 0,00034741  |
| transmembrane protein 38B                                                    | 0,762865701 | 10,14922474 | 20,9073791   | 7,03E-05 | 0,000348109 |
| TNF receptor-associated factor 5                                             | 0,746197081 | 6,028943405 | 20,89464893  | 7,05E-05 | 0,000348217 |
| molybdenum cofactor sulfurase                                                | 0,870609241 | 8,205177801 | 20,87830382  | 7,08E-05 | 0,000348638 |
| Fez family zinc finger 2                                                     | 0,809662949 | 6,225176338 | 20,8205964   | 7,18E-05 | 0,000352639 |
| avian reticuloendotheliosis viral (v-rel) oncogene related B                 | 0,814551255 | 10,12844742 | 20,80157355  | 7,22E-05 | 0,000352679 |
| neurolysin (metallopeptidase M3 family)                                      | 0,977017394 | 7,073271579 | 20,79749769  | 7,22E-05 | 0,000352679 |
| UDP-GlcNAc:betaGal beta-1,3-N-acetylglucosaminyltransferase 3                | 0,760744873 | 5,385374692 | 20,74650571  | 7,31E-05 | 0,000355386 |
| CD151 antigen                                                                | 0,71781351  | 7,196267914 | 20,74405957  | 7,32E-05 | 0,000355386 |
| GTP binding protein 1                                                        | 0,785814492 | 7,503877544 | 20,66245067  | 7,47E-05 | 0,000361641 |
| ninein                                                                       | 0,92961938  | 7,135562995 | 20,62276502  | 7,54E-05 | 0,000364215 |

|                                                                               |             |             |             |             |             |
|-------------------------------------------------------------------------------|-------------|-------------|-------------|-------------|-------------|
| cDNA sequence BC037034                                                        | 0,970666192 | 8,979195239 | 20,5525114  | 7,67E-05    | 0,000369597 |
| RIKEN cDNA 2810008M24 gene                                                    | 0,93138136  | 7,756322422 | 20,53469327 | 7,71E-05    | 0,000369597 |
| non-metastatic cells 2, protein (NM23B) expressed in                          | 1,016532653 | 12,00306134 | 20,53072857 | 7,72E-05    | 0,000369597 |
| potassium channel tetramerisation domain containing 12b                       | 0,858334763 | 5,441884806 | 20,51439057 | 7,75E-05    | 0,000370095 |
| receptor accessory protein 5                                                  | 0,80363732  | 7,983155531 | 20,44881085 | 7,88E-05    | 0,000375182 |
| transmembrane emp24-like trafficking protein 10 (yeast)                       | 0,807156147 | 10,14746979 | 20,41371721 | 7,95E-05    | 0,000377465 |
| TRIO and F-actin binding protein                                              | 0,792434582 | 11,95368561 | 20,34712094 | 8,08E-05    | 0,00038278  |
| mindbomb homolog 2 (Drosophila)                                               | 0,764783977 | 8,652036815 | 20,30558804 | 8,16E-05    | 0,000385751 |
| neuron navigator 1                                                            | 0,804103437 | 9,166945306 | 20,22942907 | 8,32E-05    | 0,000392159 |
| high density lipoprotein (HDL) binding protein                                | 0,878852918 | 9,146917535 | 20,19704595 | 8,39E-05    | 0,000394228 |
| melanoma antigen, family E, 1                                                 | 1,136640343 | 9,087751893 | 20,18730275 | 8,41E-05    | 0,000394228 |
| growth arrest-specific 2 like 3                                               | 0,91497978  | 8,06484373  | 20,16184355 | 8,47E-05    | 0,000395713 |
| NAD kinase                                                                    | 1,077266139 | 10,08843553 | 20,09286556 | 8,61E-05    | 0,000401607 |
| vav 1 oncogene                                                                | 0,963112256 | 9,734617826 | 20,07540862 | 8,65E-05    | 0,000402318 |
| CLPTM1-like                                                                   | 0,807069917 | 10,24225012 | 20,03510531 | 8,74E-05    | 0,000405376 |
| Rap1 GTPase-activating protein                                                | 0,894482328 | 5,928694365 | 19,89337642 | 9,06E-05    | 0,000418659 |
| calcium and integrin binding family member 2                                  | 0,962637813 | 6,473649781 | 19,88770616 | 9,08E-05    | 0,000418659 |
| catenin beta interacting protein 1                                            | 0,804941236 | 6,640393669 | 19,87050887 | 9,12E-05    | 0,000419398 |
| 6-phosphofructo-2-kinase/fructose-2,6-biphosphatase 4                         | 1,116348625 | 8,766904721 | 19,85613225 | 9,15E-05    | 0,000419839 |
| methylmalonyl CoA epimerase                                                   | 1,037690232 | 9,248923414 | 19,84528571 | 9,17E-05    | 0,000419906 |
| epithelial membrane protein 3                                                 | 0,862573036 | 12,73099274 | 19,8190919  | 9,24E-05    | 0,000421627 |
| propionyl Coenzyme A carboxylase, beta polypeptide                            | 0,912329232 | 6,100089125 | 19,77917606 | 9,33E-05    | 0,000424853 |
| imprinted and ancient                                                         | 0,762345696 | 9,740591522 | 19,74930594 | 9,40E-05    | 0,000427011 |
| cyclin-dependent kinase 2 interacting protein                                 | 0,932167756 | 7,229658392 | 19,6618411  | 9,62E-05    | 0,000434666 |
| Rho GTPase activating protein 17                                              | 0,920295935 | 10,59761152 | 19,66005831 | 9,62E-05    | 0,000434666 |
| solute carrier family 10 (sodium/bile acid cotransporter family), member 3    | 0,755685997 | 7,71407108  | 19,62112562 | 9,72E-05    | 0,000437919 |
| aldehyde dehydrogenase family 3, subfamily A1                                 | 1,246211846 | 5,090428648 | 19,59478691 | 9,78E-05    | 0,000439774 |
| N-acetylneuraminic acid synthase (sialic acid synthase)                       | 0,948349285 | 10,51150316 | 19,56121202 | 9,87E-05    | 0,000442469 |
| RPA interacting protein                                                       | 0,762827749 | 8,648459658 | 19,45507674 | 0,000101441 | 0,000453007 |
| olfactomedin-like 2B                                                          | 1,395806333 | 5,040648778 | 19,45060804 | 0,000101558 | 0,000453007 |
| formin-like 3                                                                 | 0,837928712 | 6,36097638  | 19,42996048 | 0,000102104 | 0,000454286 |
| beta-1,4-N-acetyl-galactosaminyl transferase 1                                | 0,771769356 | 9,952578547 | 19,36072958 | 0,000103959 | 0,000461367 |
| dehydrogenase/reductase (SDR family) X chromosome                             | 0,927093539 | 7,032720271 | 19,31564268 | 0,000105188 | 0,00046496  |
| ATPase, H+ transporting, lysosomal V0 subunit D1                              | 0,890543125 | 9,984650105 | 19,31158918 | 0,000105299 | 0,00046496  |
| predicted gene, 19962                                                         | 0,642039031 | 6,802597226 | 19,28733903 | 0,000105968 | 0,000466736 |
| ninjurin 1                                                                    | 0,797605144 | 6,514241362 | 19,23999766 | 0,000107287 | 0,000471363 |
| Fc receptor, IgG, alpha chain transporter                                     | 0,814491453 | 9,030759479 | 19,1825824  | 0,000108912 | 0,000475957 |
| eukaryotic translation elongation factor 1 alpha 2                            | 0,637810609 | 6,426764061 | 19,18050375 | 0,000108971 | 0,000475957 |
| TRIO and F-actin binding protein                                              | 0,796557744 | 11,67856882 | 19,1743675  | 0,000109147 | 0,000475957 |
| isocitrate dehydrogenase 2 (NADP+), mitochondrial                             | 1,052633825 | 7,775593382 | 19,14047007 | 0,000110122 | 0,000479018 |
| 3'-phosphoadenosine 5'-phosphosulfate synthase 1                              | 1,262293623 | 8,759884709 | 19,07816823 | 0,000111941 | 0,000485723 |
| hydroxy-delta-5-steroid dehydrogenase, 3 beta- and steroid delta-isomerase 7  | 0,812818922 | 9,874342659 | 19,06397152 | 0,00011236  | 0,000486338 |
| growth factor receptor bound protein 2-associated protein 1                   | 0,73212021  | 6,622726842 | 19,04746211 | 0,00011285  | 0,000487247 |
| START domain containing 10                                                    | 0,900892526 | 7,101614803 | 19,03818896 | 0,000113126 | 0,000487247 |
| Rho guanine nucleotide exchange factor (GEF) 1                                | 0,786741483 | 6,637004236 | 19,00766362 | 0,00011404  | 0,000489983 |
| adhesion molecule, interacts with CXADR antigen 1                             | 0,737733982 | 5,539205988 | 18,9257316  | 0,000115437 | 0,000499487 |
| transmembrane protein, adipocyte associated 1                                 | 0,761682271 | 8,32309161  | 18,88979609 | 0,000117652 | 0,000501354 |
| activating transcription factor 3                                             | 0,750852753 | 9,700176189 | 18,88730395 | 0,00011773  | 0,000501354 |
| phosphatidylinositol transfer protein, alpha                                  | 0,873775705 | 9,058719817 | 18,87802888 | 0,00011802  | 0,000501354 |
| family with sequence similarity 195, member A                                 | 0,936005697 | 6,095165181 | 18,86399148 | 0,000118461 | 0,000501354 |
| sine oculis-binding protein homolog (Drosophila)                              | 0,661617216 | 5,76886542  | 18,85911192 | 0,000118614 | 0,000501354 |
| MPV17 mitochondrial membrane protein-like 2                                   | 0,758402299 | 8,403231752 | 18,85673227 | 0,000118689 | 0,000501354 |
| arginyl aminopeptidase (aminopeptidase B)-like 1                              | 0,828794192 | 11,67497246 | 18,78511183 | 0,000120971 | 0,000509763 |
| ski sarcoma viral oncogene homolog (avian)                                    | 0,692039185 | 5,676469378 | 18,74595273 | 0,000122239 | 0,000512332 |
| adenylosuccinate synthetase like 1                                            | 0,813875846 | 10,23765165 | 18,74099221 | 0,000122401 | 0,000512332 |
| eosinophil-associated, ribonuclease A family, member 11                       | 0,873216088 | 5,389713306 | 18,73928301 | 0,000122457 | 0,000512332 |
| ribosomal protein, large, P0                                                  | 0,865156005 | 7,465431785 | 18,72865713 | 0,000122805 | 0,000512563 |
| bone morphogenetic protein 1                                                  | 0,760925066 | 8,561470948 | 18,69247976 | 0,000123997 | 0,000516129 |
| zinc finger protein 36                                                        | 0,899214742 | 12,09106284 | 18,68490971 | 0,000124248 | 0,000516129 |
| forkhead box P4                                                               | 0,799140126 | 8,633015043 | 18,61204187 | 0,000126695 | 0,00052505  |
| spermatid perinuclear RNA binding protein                                     | 0,806214184 | 7,39573859  | 18,45848703 | 0,000132035 | 0,00054589  |
| Rac/Cdc42 guanine nucleotide exchange factor (GEF) 6                          | 0,815897066 | 10,26758604 | 18,41669269 | 0,000133533 | 0,000550783 |
| lysine (K)-specific demethylase 6A                                            | 0,862189538 | 8,337386814 | 18,37909464 | 0,000134897 | 0,000552931 |
| CDC42 small effector 1                                                        | 0,873307553 | 11,73366204 | 18,36903025 | 0,000135265 | 0,000552931 |
| microtubule associated monooxygenase, calponin and LIM domain containing 2    | 0,72379127  | 7,341180816 | 18,36750772 | 0,00013532  | 0,000552931 |
| guanine nucleotide binding protein (G protein), gamma 2                       | 0,730283622 | 7,201357131 | 18,35965767 | 0,000135608 | 0,000552931 |
| YEATS domain containing 2                                                     | 0,868581531 | 7,488506082 | 18,35693254 | 0,000135708 | 0,000552931 |
| tripartite motif-containing 29                                                | 0,924249059 | 5,658385916 | 18,35047239 | 0,000135946 | 0,000552931 |
| echinoderm microtubule associated protein like 3                              | 0,74647422  | 6,523316181 | 18,33878928 | 0,000136377 | 0,0005534   |
| ubiquitin-conjugating enzyme E2L 3                                            | 0,789827762 | 11,16542307 | 18,31274132 | 0,000137343 | 0,000556035 |
| zinc finger, DHHC domain containing 3                                         | 0,824384713 | 6,050526868 | 18,29648032 | 0,000137951 | 0,000557206 |
| polymerase (RNA) I polypeptide A                                              | 0,977773719 | 7,715185328 | 18,27066744 | 0,000138921 | 0,000559836 |
| pleckstrin homology domain containing, family G (with RhoGef domain) member 2 | 0,83143321  | 10,62998298 | 18,25015244 | 0,000139698 | 0,000561675 |
| inner centromere protein                                                      | 0,994826235 | 5,925156512 | 18,21592991 | 0,000141005 | 0,000565633 |
| A kinase (PRKA) anchor protein 5                                              | 0,7792557   | 5,847743944 | 18,18360701 | 0,000142252 | 0,000568287 |
| RIKEN cDNA 5033414D02 gene                                                    | 0,830372824 | 10,80698981 | 18,18198772 | 0,000142315 | 0,000568287 |
| Fc receptor, IgG, alpha chain transporter                                     | 0,737863916 | 7,328661878 | 18,12152058 | 0,000144684 | 0,000576433 |
| ATP-binding cassette, sub-family A (ABC1), member 3                           | 1,184845694 | 9,96998174  | 18,06179069 | 0,000147068 | 0,000584603 |
| RIKEN cDNA 2010107H07 gene                                                    | 0,764943003 | 9,165088094 | 18,0362413  | 0,000148101 | 0,00058738  |
| ATP-binding cassette, sub-family G (WHITE), member 1                          | 0,680954803 | 7,348369445 | 18,0267421  | 0,000148488 | 0,000587583 |
| folypolyglutamyl synthetase                                                   | 1,052765955 | 7,464198786 | 18,0090853  | 0,000149209 | 0,000589108 |

|                                                                                  |             |             |             |             |             |
|----------------------------------------------------------------------------------|-------------|-------------|-------------|-------------|-------------|
| glypican 1                                                                       | 0,912972469 | 13,21801263 | 17,95675975 | 0,000151371 | 0,000596298 |
| N-acylsphingosine amidohydrolase 1                                               | 0,795970659 | 12,22005791 | 17,93717807 | 0,000152189 | 0,000597777 |
| solute carrier family 30 (zinc transporter), member 1                            | 0,997559999 | 6,269409353 | 17,92883213 | 0,000152539 | 0,000597777 |
| selectin, platelet (p-selectin) ligand                                           | 0,757489745 | 11,54506689 | 17,92335977 | 0,000152769 | 0,000597777 |
| solute carrier family 35, member E3                                              | 0,837493317 | 7,932506598 | 17,90534855 | 0,000153529 | 0,000598197 |
| zinc finger protein 90                                                           | 0,804204272 | 6,99866247  | 17,90464892 | 0,000153559 | 0,000598197 |
| Williams Beuren syndrome chromosome region 22                                    | 0,890054636 | 7,974995789 | 17,8578505  | 0,000155555 | 0,000604629 |
| protein kinase, interferon inducible double stranded RNA dependent activator     | 0,861404646 | 8,68706502  | 17,84877231 | 0,000155946 | 0,000604807 |
| starch binding domain 1                                                          | 0,882519998 | 7,271422163 | 17,81982935 | 0,000157199 | 0,000608162 |
| DnaJ (Hsp40) homolog, subfamily C, member 19                                     | 0,99020235  | 10,42725166 | 17,8128022  | 0,000157505 | 0,000608162 |
| ZW10 homolog (Drosophila), centromere/kinetochore protein                        | 0,723175832 | 7,33655594  | 17,79862727 | 0,000158124 | 0,000609211 |
| Ras-like without CAAX 1                                                          | 0,868439153 | 10,65194966 | 17,64094199 | 0,000165204 | 0,000635094 |
| high mobility group box transcription factor 1                                   | 0,844572334 | 10,89412598 | 17,58153515 | 0,000167966 | 0,000644297 |
| zinc finger protein 277                                                          | 0,942914759 | 9,5694162   | 17,54818111 | 0,000169539 | 0,000648913 |
| DENN/MADD domain containing 2A                                                   | 1,01323459  | 6,282649471 | 17,52440331 | 0,000170671 | 0,000649272 |
| protein kinase C, eta                                                            | 1,074112993 | 5,477093072 | 17,52321578 | 0,000170728 | 0,000649272 |
| ATPase, Ca++ transporting, plasma membrane 1                                     | 0,778509223 | 7,862340158 | 17,52159613 | 0,000170805 | 0,000649272 |
| immunoglobulin superfamily, member 9                                             | 1,172463847 | 7,257866727 | 17,51513794 | 0,000171115 | 0,000649272 |
| EPS8-like 2                                                                      | 0,724899501 | 6,026283026 | 17,48933342 | 0,000172357 | 0,000652573 |
| HEAT repeat containing 1                                                         | 0,931345297 | 9,035439228 | 17,40250156 | 0,000176613 | 0,000667246 |
| hyperpolarization-activated, cyclic nucleotide-gated K+ 3                        | 0,725992952 | 5,63584304  | 17,38989076 | 0,000177241 | 0,000667446 |
| annexin A4                                                                       | 0,986733907 | 8,353909207 | 17,38685735 | 0,000177427 | 0,000667446 |
| RIKEN cDNA 2700094K13 gene                                                       | 1,092739408 | 9,501524532 | 17,37189202 | 0,000178142 | 0,000668699 |
| vaccinia related kinase 2                                                        | 1,349527234 | 7,175075828 | 17,30898619 | 0,000181332 | 0,000677906 |
| nucleobindin 1                                                                   | 0,928465502 | 9,649635213 | 17,30828548 | 0,000181368 | 0,000677906 |
| zinc finger protein 36, C3H type-like 1                                          | 0,941183145 | 13,79585937 | 17,29685761 | 0,000181954 | 0,000677916 |
| N-acetylglucosamine-1-phosphotransferase, gamma subunit                          | 0,786353007 | 9,52004746  | 17,29317534 | 0,000182144 | 0,000677916 |
| scavenger receptor class A, member 3                                             | 0,943160591 | 8,409513742 | 17,25711245 | 0,000184012 | 0,000683417 |
| cathepsin H                                                                      | 0,871255802 | 11,40582222 | 17,24777078 | 0,000184499 | 0,000683779 |
| peroxisomal biogenesis factor 26                                                 | 0,750544387 | 5,685207269 | 17,23887747 | 0,000184965 | 0,000684057 |
| coiled-coil domain containing 125                                                | 0,821709848 | 5,081277223 | 17,21936399 | 0,000185991 | 0,000686404 |
| Sfi1 homolog, spindle assembly associated (yeast)                                | 0,685248702 | 6,707400519 | 17,17246046 | 0,000188483 | 0,000694142 |
| RIKEN cDNA 2310004N24 gene                                                       | 1,004036561 | 6,75617307  | 17,02893662 | 0,000196353 | 0,000721326 |
| F-box and leucine-rich repeat protein 6                                          | 0,880742641 | 7,945922601 | 17,01596632 | 0,000197082 | 0,000721326 |
| 3-hydroxy-3-methylglutaryl-Coenzyme A lyase                                      | 0,781816281 | 9,423016124 | 17,01566465 | 0,000197099 | 0,000721326 |
| enoyl-Coenzyme A delta isomerase 3                                               | 1,153710174 | 6,048369238 | 16,95411194 | 0,000200604 | 0,000732624 |
| regulator of G-protein signalling 10                                             | 0,871114294 | 12,03606843 | 16,85366994 | 0,000206479 | 0,000752509 |
| A kinase (PRKA) anchor protein (yotiao) 9                                        | 0,839958237 | 9,804336787 | 16,84133065 | 0,000207214 | 0,000753622 |
| DEAD/H (Asp-Glu-Ala-Asp/His) box polypeptide 26B                                 | 1,174601203 | 6,615425035 | 16,80222839 | 0,000209563 | 0,000760589 |
| GATS protein-like 2                                                              | 0,805172306 | 8,863786299 | 16,76463486 | 0,000211851 | 0,000767303 |
| transducin-like enhancer of split 6, homolog of Drosophila E(spl)                | 1,104162225 | 7,490211801 | 16,75451226 | 0,000212472 | 0,000767965 |
| period homolog 2 (Drosophila)                                                    | 1,109041736 | 5,401151616 | 16,71511703 | 0,000214908 | 0,000775173 |
| RPA interacting protein                                                          | 0,783342215 | 6,64536131  | 16,69487596 | 0,000216173 | 0,000777289 |
| ATPase, H+ transporting, lysosomal V0 subunit D1                                 | 0,860623811 | 11,67343347 | 16,69153856 | 0,000216382 | 0,000777289 |
| nudix (nucleoside diphosphate linked moiety X)-type motif 19                     | 0,818465301 | 6,983129255 | 16,66657256 | 0,000217955 | 0,000781338 |
| LIM domain and actin binding 1                                                   | 0,720577291 | 10,61115702 | 16,59675096 | 0,000222423 | 0,000795731 |
| hypothetical protein LOC100505208                                                | 0,953115252 | 6,391556646 | 16,56806199 | 0,00022429  | 0,000800775 |
| interleukin 13 receptor, alpha 1                                                 | 0,793878946 | 8,022149553 | 16,52646505 | 0,000227028 | 0,000807838 |
| interleukin enhancer binding factor 3                                            | 0,857520596 | 8,585980798 | 16,52037369 | 0,000227433 | 0,000807838 |
| growth factor, erv1 (S. cerevisiae)-like (augmenter of liver regeneration)       | 1,000521414 | 8,943929006 | 16,51709281 | 0,000227651 | 0,000807838 |
| RIKEN cDNA D830044I16 gene                                                       | 1,041806923 | 5,634752404 | 16,50891129 | 0,000228196 | 0,000808135 |
| ATPase, H+ transporting, lysosomal V0 subunit D1                                 | 0,836630717 | 9,988778849 | 16,49899504 | 0,000228858 | 0,000808847 |
| DNA segment, Chr 16, human D22S680E, expressed                                   | 0,774987949 | 9,227397241 | 16,45115648 | 0,000232084 | 0,000818599 |
| ribosomal protein L4                                                             | 0,934566484 | 9,321773782 | 16,4353854  | 0,000233159 | 0,000819849 |
| adaptor-related protein complex 2, beta 1 subunit                                | 0,745859951 | 8,959140786 | 16,4322479  | 0,000233374 | 0,000819849 |
| AHNAK nucleoprotein 2                                                            | 0,757188543 | 7,468703696 | 16,36822696 | 0,000237802 | 0,000833733 |
| transcription elongation factor A (SII), 2                                       | 1,015972447 | 6,45878112  | 16,28080375 | 0,000244005 | 0,000853773 |
| TBC1 domain family, member 10c                                                   | 0,814346263 | 8,237212762 | 16,24030799 | 0,000246941 | 0,000860762 |
| asparagine-linked glycosylation 8 homolog (yeast, alpha-1,3-glucosyltransferase) | 1,080429824 | 6,830035786 | 16,23971485 | 0,000246984 | 0,000860762 |
| HtrA serine peptidase 2                                                          | 0,933084824 | 8,389691897 | 16,21799364 | 0,000248576 | 0,00086459  |
| paralemmin                                                                       | 0,674764571 | 4,927692453 | 16,2054636  | 0,0002495   | 0,000866085 |
| amyloid beta (A4) precursor-like protein 2                                       | 0,887513989 | 12,11565395 | 16,05779492 | 0,000260686 | 0,000903129 |
| cathepsin H                                                                      | 0,776569095 | 12,62899357 | 15,97681411 | 0,000267065 | 0,000923401 |
| RAD50 homolog (S. cerevisiae)                                                    | 0,821770992 | 8,016695978 | 15,90282456 | 0,000273049 | 0,000941585 |
| heat shock transcription factor family member 5                                  | 1,048311181 | 5,060775117 | 15,89857292 | 0,000273398 | 0,000941585 |
| signal-regulatory protein alpha                                                  | 0,809413034 | 11,99004844 | 15,86696475 | 0,000276005 | 0,0009487   |
| phospholysine phosphohistidine inorganic pyrophosphate phosphatase               | 0,781095802 | 6,190042588 | 15,84905065 | 0,000277495 | 0,000951956 |
| interleukin 18 receptor 1                                                        | 0,791011698 | 4,829846239 | 15,78467471 | 0,000282928 | 0,000968696 |
| cytochrome b-245, alpha polypeptide                                              | 0,974275823 | 13,82226031 | 15,74751657 | 0,000286119 | 0,000977112 |
| low density lipoprotein receptor-related protein 11                              | 0,955347536 | 6,740392913 | 15,70094435 | 0,000290177 | 0,000989649 |
| adaptor-related protein complex AP-4, mu 1                                       | 0,918355815 | 6,254154285 | 15,69410677 | 0,000290778 | 0,000989774 |
| RAN guanine nucleotide release factor                                            | 0,990417952 | 6,321318134 | 15,66657754 | 0,000293213 | 0,00099613  |
| neutrophil cytosolic factor 2                                                    | 0,987071109 | 6,171553012 | 15,64999659 | 0,000294692 | 0,000999215 |
| thyroid hormone receptor interactor 12                                           | 0,71405462  | 5,878233434 | 15,60304851 | 0,000298923 | 0,01011608  |
| elcC homolog 1 (E. coli)                                                         | 0,840513475 | 6,565627403 | 15,56211919 | 0,00030267  | 0,01022312  |
| dehydrogenase/reductase (SDR family) member 7                                    | 1,099759138 | 9,00398542  | 15,5381148  | 0,000304892 | 0,01027838  |
| ancient ubiquitous protein 1                                                     | 0,768643802 | 10,89762267 | 15,52557347 | 0,00030606  | 0,01028955  |
| signal transducing adaptor family member 2                                       | 0,83836029  | 7,304600789 | 15,51775409 | 0,000306792 | 0,01028955  |
| prion protein                                                                    | 0,858900957 | 11,9580051  | 15,51569712 | 0,000306984 | 0,01028955  |
| UV radiation resistance associated gene                                          | 0,784624726 | 10,9787959  | 15,50627227 | 0,000307869 | 0,01029995  |
| adenosine monophosphate deaminase 1                                              | 0,686568099 | 5,013387866 | 15,49737325 | 0,000308707 | 0,01030774  |

|                                                                                        |              |             |             |             |             |
|----------------------------------------------------------------------------------------|--------------|-------------|-------------|-------------|-------------|
| mesoderm induction early response 1, family member 2                                   | 0,809788685  | 9,275363757 | 15,49118339 | 0,000309291 | 0,001030774 |
| amyotrophic lateral sclerosis 2 (juvenile) homolog (human)                             | 0,745282208  | 5,925162979 | 15,44076234 | 0,000314098 | 0,001044809 |
| regulator of chromosome condensation (RCC1) and BTB (POZ) domain containing protein 2  | 0,701750175  | 5,736181148 | 15,40135453 | 0,000317915 | 0,001055503 |
| protection of telomeres 1B                                                             | 0,896812967  | 5,212094493 | 15,38698133 | 0,000319321 | 0,001058164 |
| transmembrane protein 97                                                               | 0,96135817   | 6,905409886 | 15,34452871 | 0,000323513 | 0,001070036 |
| N-acetylglucosamine kinase                                                             | 0,70855054   | 8,598686201 | 15,32304076 | 0,00032566  | 0,001073149 |
| zinc finger protein 36, C3H type-like 1                                                | 1,002812089  | 12,01640686 | 15,32284837 | 0,000325679 | 0,001073149 |
| ubiquitin specific peptidase 39                                                        | 0,83324535   | 8,201618288 | 15,31340849 | 0,000326627 | 0,001074253 |
| zinc finger protein 532                                                                | 0,687895601  | 5,833802353 | 15,25717032 | 0,000332341 | 0,001091    |
| ATP-binding cassette, sub-family A (ABC1), member 3                                    | 1,003090625  | 8,040602808 | 15,24108868 | 0,000333996 | 0,001094384 |
| cell division cycle 20 homolog (S. cerevisiae)                                         | 0,672323976  | 5,30728201  | 15,22188948 | 0,000335985 | 0,001096009 |
| N(alpha)-acetyltransferase 40, NatD catalytic subunit, homolog (S. cerevisiae)         | 0,853205298  | 8,591796363 | 15,21829623 | 0,000336358 | 0,001096009 |
| histidine triad nucleotide binding protein 1                                           | 0,927387998  | 11,32452361 | 15,21820371 | 0,000336368 | 0,001096009 |
| guanine nucleotide binding protein (G protein), beta 4                                 | 1,005647674  | 8,458601304 | 15,20986036 | 0,000337237 | 0,001096421 |
| deltex 4 homolog (Drosophila)                                                          | 0,862872953  | 6,933193956 | 15,20499774 | 0,000337745 | 0,001096421 |
| nuclear factor of activated T-cells, cytoplasmic, calcineurin-dependent 1              | 0,723133283  | 6,74247751  | 15,17611932 | 0,00034078  | 0,001104226 |
| cyclin-dependent kinase-like 2 (CDC2-related kinase)                                   | 0,757382146  | 5,655947342 | 15,15090055 | 0,000343455 | 0,001110842 |
| echinoderm microtubule associated protein like 5                                       | 0,724120485  | 5,557936544 | 14,92329992 | 0,000356121 | 0,00112182  |
| DNA segment, Chr 6, Wayne State University 163, expressed                              | 0,919983651  | 7,299272796 | 15,10495946 | 0,000348391 | 0,001122665 |
| ATPase, H+ transporting, lysosomal V0 subunit D1                                       | 0,862488362  | 11,16326033 | 15,08817319 | 0,000350215 | 0,001126471 |
| START domain containing 8                                                              | 0,711696766  | 6,549443797 | 15,07305637 | 0,000351867 | 0,001129711 |
| ATPase, H+ transporting, lysosomal V1 subunit B2                                       | 0,740540675  | 12,11997686 | 15,03449471 | 0,000356121 | 0,001141228 |
| v-raf-leukemia viral oncogene 1                                                        | 1,048815168  | 7,956640752 | 14,99644119 | 0,000360377 | 0,001152812 |
| receptor-associated protein of the synapse                                             | 0,851606567  | 5,143465949 | 14,98039587 | 0,000362189 | 0,001156499 |
| cutC copper transporter homolog (E.coli)                                               | 0,903133614  | 7,515406085 | 14,95485298 | 0,000365096 | 0,001163659 |
| phosphodiesterase 2A, cGMP-stimulated                                                  | 0,7917135604 | 4,973567519 | 14,92066593 | 0,000369027 | 0,001174056 |
| arginyl aminopeptidase (aminopeptidase B)                                              | 0,76571606   | 9,568332662 | 14,88494425 | 0,000373187 | 0,001185141 |
| A kinase (PRKA) anchor protein (yotiao) 9                                              | 0,777387776  | 9,744874545 | 14,87661846 | 0,000374165 | 0,001186096 |
| RIKEN cDNA 5930434B04 gene                                                             | 1,055454405  | 5,540762939 | 14,83749599 | 0,000378797 | 0,001198611 |
| E2F transcription factor 2                                                             | 0,746768149  | 4,963464338 | 14,8231645  | 0,00038051  | 0,001201863 |
| histocompatibility (minor) HA-1                                                        | 0,716423993  | 9,469360279 | 14,77215066 | 0,000386681 | 0,001219158 |
| eukaryotic translation elongation factor 1 delta (guanine nucleotide exchange protein) | 0,723237493  | 5,167816789 | 14,71284204 | 0,000394    | 0,001240003 |
| spermidine synthase                                                                    | 1,143946193  | 6,397961911 | 14,69387111 | 0,000396375 | 0,001245241 |
| peptidyl-tRNA hydrolase 1 homolog (S. cerevisiae)                                      | 0,775605923  | 6,537018668 | 14,66617916 | 0,00039987  | 0,001253976 |
| phosphate cytidyltransferase 2, ethanolamine                                           | 0,68663231   | 6,905387839 | 14,58690132 | 0,000410075 | 0,001283168 |
| ecto-NOX disulfide-thiol exchanger 2                                                   | 1,002486603  | 7,248848369 | 14,57698277 | 0,000411373 | 0,001283168 |
| phenylalanyl-tRNA synthetase, beta subunit                                             | 0,893890832  | 9,361896907 | 14,57571137 | 0,000411539 | 0,001283168 |
| pleckstrin homology domain containing, family G (with RhoGef domain) member 2          | 0,801733052  | 9,663960462 | 14,57138518 | 0,000412107 | 0,001283168 |
| cDNA sequence BC002230                                                                 | 0,859486819  | 6,823812762 | 14,52357085 | 0,000418442 | 0,001300583 |
| ATM interactor                                                                         | 0,805593334  | 9,77005789  | 14,5084322  | 0,000420471 | 0,001304576 |
| prolyl 4-hydroxylase, beta polypeptide                                                 | 0,875420357  | 11,54149116 | 14,47910429 | 0,000424434 | 0,001313476 |
| active BCR-related gene                                                                | 0,7756271204 | 7,598129038 | 14,47381425 | 0,000425153 | 0,001313476 |
| acyl-CoA thioesterase 11                                                               | 1,050496458  | 6,93077749  | 14,47062543 | 0,000425587 | 0,001313476 |
| secretory carrier membrane protein 1                                                   | 1,131790167  | 10,32596848 | 14,42444667 | 0,000431934 | 0,001330772 |
| non-metastatic cells 2, protein (NM23B) expressed in                                   | 1,091944468  | 10,81657278 | 14,40679828 | 0,000434388 | 0,001335635 |
| LAG1 homolog, ceramide synthase 2                                                      | 0,863320659  | 11,69950155 | 14,40203503 | 0,000435053 | 0,001335635 |
| solute carrier family 41, member 3                                                     | 1,023641511  | 5,860017827 | 14,38093853 | 0,000438013 | 0,001342371 |
| high mobility group 20 B                                                               | 0,784983653  | 8,279100097 | 14,31042138 | 0,000448075 | 0,001370766 |
| tuberous sclerosis 2                                                                   | 0,83517903   | 9,516048598 | 14,30512332 | 0,000448842 | 0,001370766 |
| family with sequence similarity 116, member A                                          | 0,937895895  | 6,091193917 | 14,28484478 | 0,00045179  | 0,00137737  |
| melanoregulin                                                                          | 0,966619289  | 8,172878796 | 14,25425959 | 0,000456279 | 0,001386989 |
| P450 (cytochrome) oxidoreductase                                                       | 0,916406045  | 8,421202299 | 14,25257617 | 0,000456527 | 0,001386989 |
| H2-K region expressed gene 6                                                           | 0,960312032  | 9,130964018 | 14,24042918 | 0,000458325 | 0,001390042 |
| serpine1 mRNA binding protein 1                                                        | 0,888871353  | 4,941336344 | 14,22857902 | 0,000460087 | 0,001392976 |
| nucleoporin 93                                                                         | 0,888166901  | 9,5498182   | 14,22278612 | 0,000460951 | 0,001393186 |
| RIKEN cDNA A930005H10 gene                                                             | 0,741088444  | 5,698082186 | 14,19798468 | 0,000464672 | 0,00140111  |
| nuclear RNA export factor 1 homolog (S. cerevisiae)                                    | 1,162197442  | 8,270459556 | 14,19469596 | 0,000465168 | 0,00140111  |
| CD59a antigen                                                                          | 0,690687806  | 6,288636403 | 14,17817301 | 0,000467669 | 0,001405208 |
| pyruvate dehydrogenase kinase, isoenzyme 3                                             | 0,927230361  | 7,760147444 | 14,1751038  | 0,000468136 | 0,001405208 |
| serine/arginine-rich splicing factor 6                                                 | 0,796061844  | 7,467512723 | 14,15804504 | 0,000470737 | 0,001410601 |
| ribophorin II                                                                          | 0,937481729  | 11,89858131 | 14,14816715 | 0,000472251 | 0,001412723 |
| UBX domain protein 8                                                                   | 1,027483114  | 6,43072277  | 14,13755407 | 0,000473883 | 0,001415192 |
| ATPase inhibitory factor 1                                                             | 1,023679097  | 13,50127773 | 14,08539497 | 0,000482002 | 0,00143699  |
| RIKEN cDNA 2810407C02 gene                                                             | 0,801198848  | 10,89868914 | 14,07863618 | 0,000483066 | 0,001437716 |
| cholinergic receptor, nicotinic, beta polypeptide 1 (muscle)                           | 0,920828833  | 6,138468708 | 14,04145191 | 0,000488967 | 0,00145181  |
| RIKEN cDNA 1300010F03 gene                                                             | 0,910833711  | 4,850894085 | 14,03837763 | 0,000489458 | 0,00145181  |
| transmembrane protein 62                                                               | 1,182163865  | 7,025929598 | 14,02053045 | 0,000492323 | 0,001457841 |
| interleukin-1 receptor-associated kinase 1                                             | 0,929766467  | 8,207745494 | 14,00741535 | 0,00049444  | 0,001461641 |
| cell adhesion molecule-related/down-regulated by oncogenes                             | 0,802149691  | 5,820984955 | 13,96041642 | 0,000502114 | 0,001481827 |
| activity regulated cytoskeletal-associated protein                                     | 0,771756381  | 9,031411    | 13,95240058 | 0,000503436 | 0,001483233 |
| prune homolog (Drosophila)                                                             | 0,782372017  | 7,799811781 | 13,93811396 | 0,000505803 | 0,001486477 |
| zinc finger protein 710                                                                | 0,711075869  | 8,053496021 | 13,93552589 | 0,000506233 | 0,001486477 |
| ribosomal RNA processing 12 homolog (S. cerevisiae)                                    | 0,866399363  | 7,086007627 | 13,92524984 | 0,000507945 | 0,00148901  |
| prolyl-tRNA synthetase domain containing 1                                             | 1,113438223  | 8,539404475 | 13,91972777 | 0,000508868 | 0,001489224 |
| retinoblastoma binding protein 7                                                       | 0,779252719  | 8,718074624 | 13,89110264 | 0,000513682 | 0,001498466 |
| HtrA serine peptidase 2                                                                | 1,005233375  | 8,421185348 | 13,8907862  | 0,000513735 | 0,001498466 |
| hydroxysteroid (17-beta) dehydrogenase 11                                              | 1,06084223   | 9,822440425 | 13,85224625 | 0,0005203   | 0,001514696 |
| thioredoxin-related transmembrane protein 4                                            | 0,806317314  | 6,671763765 | 13,84800926 | 0,000521028 | 0,001514696 |
| membrane protein, palmitoylated 6 (MAGUK p55 subfamily member 6)                       | 0,752988988  | 7,434601224 | 13,83383619 | 0,00052347  | 0,001519276 |
| immunoglobulin superfamily, member 3                                                   | 0,887124021  | 5,357767077 | 13,81318717 | 0,000527052 | 0,001523664 |
| LSM2 homolog, U6 small nuclear RNA associated (S. cerevisiae)                          | 0,940155419  | 7,272678774 | 13,81264904 | 0,000527145 | 0,001523664 |

|                                                                                     |             |             |             |             |             |
|-------------------------------------------------------------------------------------|-------------|-------------|-------------|-------------|-------------|
| maltase-glucoamylase                                                                | 0,674466133 | 5,085259607 | 13,81010186 | 0,000527589 | 0,001523664 |
| prokineticin receptor 1                                                             | 0,836232384 | 5,332700449 | 13,76380802 | 0,000535732 | 0,001544634 |
| leucine-rich repeat kinase 1                                                        | 0,785555394 | 11,09623914 | 13,71732035 | 0,000544053 | 0,001566051 |
| nudix (nucleoside diphosphate linked moiety X)-type motif 17                        | 1,025970332 | 8,812948956 | 13,69737362 | 0,000547669 | 0,001571528 |
| SMC hinge domain containing 1                                                       | 0,881493971 | 8,119711513 | 13,69473473 | 0,00054815  | 0,001571528 |
| ninein                                                                              | 0,956700211 | 7,59704738  | 13,69201501 | 0,000548645 | 0,001571528 |
| integrin alpha M                                                                    | 0,680349175 | 5,170945453 | 13,67968402 | 0,000550899 | 0,00157541  |
| coiled-coil domain containing 22                                                    | 0,855659919 | 9,115583445 | 13,65343962 | 0,000555731 | 0,001586664 |
| potassium inwardly-rectifying channel, subfamily K, member 6                        | 0,855245829 | 9,782742765 | 13,64094187 | 0,00055805  | 0,001590668 |
| mediator complex subunit 16                                                         | 0,779574493 | 7,78273962  | 13,60718818 | 0,000564366 | 0,001604126 |
| ATPase, H+ transporting, lysosomal accessory protein 1                              | 0,833247653 | 12,48250504 | 13,60594017 | 0,000564601 | 0,001604126 |
| ras homolog gene family, member B                                                   | 0,874876849 | 7,863119565 | 13,5984795  | 0,000566009 | 0,001605524 |
| apoptosis, caspase activation inhibitor                                             | 0,794402512 | 7,358086896 | 13,59199818 | 0,000567235 | 0,001606403 |
| beta-site APP-cleaving enzyme 2                                                     | 0,704338743 | 5,291104376 | 13,57432165 | 0,000570596 | 0,001613313 |
| immunoglobulin superfamily, member 3                                                | 0,858586762 | 6,895520367 | 13,55455846 | 0,000574379 | 0,001621396 |
| LysM, putative peptidoglycan-binding, domain containing 2                           | 1,190549354 | 5,247174944 | 13,51111503 | 0,000582799 | 0,001639891 |
| leucine zipper, putative tumor suppressor 2                                         | 0,762362591 | 6,736030341 | 13,51109766 | 0,000582802 | 0,001639891 |
| centrosomal protein 170                                                             | 0,822635592 | 9,475794438 | 13,49782861 | 0,000585402 | 0,001644566 |
| isoamyl acetate-hydrolyzing esterase 1 homolog (S. cerevisiae)                      | 1,152127848 | 8,40661176  | 13,45316554 | 0,00059425  | 0,001666753 |
| NK2 transcription factor related, locus 4 (Drosophila)                              | 0,730674615 | 4,684189759 | 13,44742071 | 0,0005954   | 0,001667309 |
| kelch-like 6 (Drosophila)                                                           | 0,720963923 | 7,363533871 | 13,44016567 | 0,000596855 | 0,001668718 |
| solute carrier family 16 (monocarboxylic acid transporters), member 9               | 1,292850599 | 5,447346254 | 13,39707004 | 0,000605582 | 0,001690422 |
| y-linked testis-specific protein 1-like                                             | 0,723759928 | 4,790572926 | 13,34209762 | 0,000616928 | 0,001719355 |
| formin-like 3                                                                       | 0,789656636 | 7,303499886 | 13,31137991 | 0,000623374 | 0,001734562 |
| kinesin family member 20B                                                           | 0,989441204 | 5,14153948  | 13,28848501 | 0,000628228 | 0,0017453   |
| olfactomedin 1                                                                      | 0,723001835 | 6,363885882 | 13,25718159 | 0,000634936 | 0,001759837 |
| predicted gene, 20117                                                               | 0,772390145 | 6,508932686 | 13,25471359 | 0,000635469 | 0,001759837 |
| inositol polyphosphate-5-phosphatase F                                              | 0,913899549 | 7,616670011 | 13,24822962 | 0,00063687  | 0,001760935 |
| family with sequence similarity 53, member B                                        | 0,742737414 | 6,028896227 | 13,18310979 | 0,000651139 | 0,001797553 |
| MEF2 activating motif and SAP domain containing transcriptional regulator           | 0,840562292 | 5,15033075  | 13,16711902 | 0,000654698 | 0,001804538 |
| pyrroline-5-carboxylate reductase-like                                              | 0,812998283 | 7,21940332  | 13,15769679 | 0,000656806 | 0,001807506 |
| ribosomal protein L21                                                               | 0,693808622 | 5,283630032 | 13,09454334 | 0,000671137 | 0,001844005 |
| RIKEN cDNA 2810008M24 gene                                                          | 0,989096295 | 8,878915325 | 13,07994517 | 0,000674501 | 0,001850392 |
| esterase D/formylglutathione hydrolase                                              | 1,276629003 | 6,035110706 | 13,05705006 | 0,000679815 | 0,001862056 |
| sel-1 suppressor of lin-12-like 3 (C. elegans)                                      | 0,674611556 | 5,332201027 | 13,04591771 | 0,000682417 | 0,00186535  |
| transcription elongation factor A (SII), 2                                          | 1,138536303 | 6,304114114 | 13,04280581 | 0,000683146 | 0,00186535  |
| euchromatic histone methyltransferase 1                                             | 0,971976566 | 5,091805454 | 13,03729077 | 0,00068444  | 0,001865978 |
| family with sequence similarity 40, member B                                        | 0,922099199 | 8,906832085 | 13,03129884 | 0,00068585  | 0,001866917 |
| regulator of telomere elongation helicase 1                                         | 0,775375624 | 5,859801083 | 13,0142553  | 0,000689878 | 0,00187497  |
| suppression of tumorigenicity 14 (colon carcinoma)                                  | 0,820587115 | 5,231294409 | 13,00398311 | 0,000692318 | 0,001878691 |
| transmembrane emp24 domain containing 3                                             | 0,736448016 | 6,957888501 | 12,99858187 | 0,000693606 | 0,001879275 |
| keratin 20                                                                          | 0,691736918 | 4,958214481 | 12,89838735 | 0,000717991 | 0,001942342 |
| sno, strawberry notch homolog 1 (Drosophila)                                        | 0,766172855 | 8,036779056 | 12,87247278 | 0,000724457 | 0,001956814 |
| elongation of very long chain fatty acids (FEN1/Elo2, SUR4/Elo3, yeast)-like 1      | 0,743051355 | 10,73937341 | 12,8323343  | 0,000734604 | 0,00198117  |
| solute carrier family 30 (zinc transporter), member 5                               | 0,718101326 | 8,254557122 | 12,80005294 | 0,000742883 | 0,001997733 |
| cysteine and histidine rich 1                                                       | 0,933787261 | 7,847983017 | 12,79905093 | 0,000743024 | 0,001997733 |
| arginine/serine-rich coiled-coil 1                                                  | 0,715719637 | 6,85650999  | 12,79484031 | 0,00074423  | 0,00199791  |
| selenoprotein N, 1                                                                  | 0,796954178 | 7,916543822 | 12,76536453 | 0,000751899 | 0,002011006 |
| leucine zipper protein 1                                                            | 0,852943763 | 7,606680251 | 12,75992409 | 0,000753325 | 0,002011006 |
| glycerophosphocholine phosphodiesterase GDE1 homolog (S. cerevisiae)                | 1,023083592 | 10,10226718 | 12,75305385 | 0,000755129 | 0,002011006 |
| heparan-alpha-glucosaminidase N-acetyltransferase                                   | 0,697882359 | 10,02586768 | 12,74626986 | 0,000756916 | 0,002011006 |
| caspase 1                                                                           | 1,174305227 | 11,84727583 | 12,74481851 | 0,000757299 | 0,002011006 |
| retinol saturase (all trans retinol 13,14 reductase)                                | 0,846567391 | 5,977046695 | 12,74273432 | 0,000757849 | 0,002011006 |
| suppressor of variegation 3-9 homolog 1 (Drosophila)                                | 0,927682957 | 6,068238483 | 12,73965755 | 0,000758662 | 0,002011006 |
| RAS-like, family 11, member B                                                       | 0,669614075 | 5,116842998 | 12,73880106 | 0,000758889 | 0,002011006 |
| hairly/enhancer-of-split related with YRPW motif 1                                  | 0,800952291 | 5,126452052 | 12,73674458 | 0,000759433 | 0,002011006 |
| RIKEN cDNA 1700021K19 gene                                                          | 0,746216419 | 7,72077805  | 12,73160795 | 0,000760794 | 0,002011572 |
| histone cluster 1, H4k                                                              | 0,695889145 | 5,800341827 | 12,72538282 | 0,000762448 | 0,002012908 |
| regulator of telomere elongation helicase 1                                         | 0,864544946 | 6,274768836 | 12,70310039 | 0,0007684   | 0,002025571 |
| spermidine synthase                                                                 | 0,953340013 | 6,331525887 | 12,69421033 | 0,000770789 | 0,00202882  |
| nucleoporin 210                                                                     | 1,01045065  | 9,396075845 | 12,66112874 | 0,000779757 | 0,002048407 |
| tumor necrosis factor, alpha-induced protein 2                                      | 0,925627217 | 8,670758291 | 12,65777314 | 0,000780673 | 0,002048407 |
| amyloid beta (A4) precursor protein-binding, family B, member 1 interacting protein | 0,812415379 | 6,769428072 | 12,65388421 | 0,000781737 | 0,002048407 |
| SEC63-like (S. cerevisiae)                                                          | 0,767393837 | 9,307006876 | 12,64872475 | 0,00078315  | 0,002049048 |
| zinc finger protein 36, C3H type-like 1                                             | 0,851806161 | 6,086984556 | 12,64328734 | 0,000784643 | 0,002049894 |
| integral membrane protein 2B                                                        | 0,999618084 | 11,26338693 | 12,63328848 | 0,000787396 | 0,002054026 |
| cDNA sequence BC005537                                                              | 0,783798142 | 8,464609737 | 12,62156251 | 0,00079064  | 0,002059422 |
| testis expressed gene 2                                                             | 0,902848427 | 5,892410923 | 12,61256106 | 0,00079314  | 0,002060322 |
| sine oculis-binding protein homolog (Drosophila)                                    | 0,727349055 | 4,920876729 | 12,61185738 | 0,000793335 | 0,002060322 |
| CKLF-like MARVEL transmembrane domain containing 7                                  | 1,082193697 | 9,596973666 | 12,59136459 | 0,000799063 | 0,002072126 |
| family with sequence similarity 113, member A                                       | 0,995792197 | 6,40115892  | 12,58559471 | 0,000800684 | 0,002073263 |
| macrophage expressed gene 1                                                         | 0,732180687 | 11,79658516 | 12,57240858 | 0,000804403 | 0,00207982  |
| muscleblind-like 1 (Drosophila)                                                     | 0,87758914  | 11,46100187 | 12,55011476 | 0,000810736 | 0,002092862 |
| gasdermin D                                                                         | 0,881122096 | 9,439454896 | 12,54626587 | 0,000811835 | 0,002092862 |
| dedicator of cytokinesis 4                                                          | 0,732458534 | 5,160566096 | 12,5183131  | 0,000819868 | 0,002110469 |
| isocitrate dehydrogenase 3 (NAD+) alpha                                             | 0,885778441 | 6,202224979 | 12,49732176 | 0,000825961 | 0,002123035 |
| elongation of very long chain fatty acids (FEN1/Elo2, SUR4/Elo3, yeast)-like 1      | 0,762885542 | 8,284404134 | 12,49152537 | 0,000827653 | 0,002124269 |
| transmembrane emp24 domain containing 3                                             | 0,965695046 | 7,51967142  | 12,48711129 | 0,000828944 | 0,002124471 |
| RIKEN cDNA 2310009B15 gene                                                          | 0,918892981 | 8,130366172 | 12,45572152 | 0,000833819 | 0,002141986 |
| GDNF-inducible zinc finger protein 1                                                | 0,747165057 | 8,154765223 | 12,45561489 | 0,000838222 | 0,002141986 |
| single stranded DNA binding protein 4                                               | 0,827908054 | 4,992547852 | 12,44688557 | 0,000840814 | 0,002145484 |



|                                                                           |             |             |              |             |             |
|---------------------------------------------------------------------------|-------------|-------------|--------------|-------------|-------------|
| tudor domain containing 3                                                 | 0,790950307 | 6,971712057 | 12,36797643  | 0,000864671 | 0,002203151 |
| adaptor protein complex AP-1, gamma 2 subunit                             | 0,832303152 | 4,695590696 | 12,34689287  | 0,000871176 | 0,002216504 |
| suppressor of variegation 4-20 homolog 2 (Drosophila)                     | 0,912021359 | 9,416638512 | 12,3388211   | 0,000873681 | 0,002219657 |
| acyl-Coenzyme A binding domain containing 6                               | 1,061510338 | 5,426826128 | 12,31669754  | 0,00088059  | 0,002233972 |
| interferon regulatory factor 2                                            | 0,807227702 | 11,19282008 | 12,30974236  | 0,000882775 | 0,002236279 |
| lysophosphatidic acid receptor 3                                          | 0,832147482 | 5,217042595 | 12,30163078  | 0,000885331 | 0,002239518 |
| RNA binding motif protein, X chromosome                                   | 1,002056652 | 7,357897951 | 12,29277489  | 0,000888132 | 0,002243364 |
| solute carrier family 30 (zinc transporter), member 5                     | 0,703809539 | 8,299285532 | 12,27701589  | 0,00089314  | 0,002252769 |
| aconitase 2, mitochondrial                                                | 0,805535281 | 9,545048044 | 12,2707943   | 0,000895126 | 0,002253638 |
| cartilage oligomeric matrix protein                                       | 1,03129616  | 5,166094183 | 12,26788786  | 0,000896056 | 0,002253638 |
| autophagy-related 7 (yeast)                                               | 0,653168064 | 5,686463174 | 12,22643189  | 0,000909436 | 0,002284014 |
| lipase, family member N                                                   | 0,713255611 | 5,233189954 | 12,2184011   | 0,000912055 | 0,002285095 |
| polyhomeotic-like 2 (Drosophila)                                          | 0,771304073 | 10,35851812 | 12,21711942  | 0,000912474 | 0,002285095 |
| haloacid dehalogenase-like hydrolase domain containing 2                  | 0,793101401 | 6,201045654 | 12,21218903  | 0,000914086 | 0,002285868 |
| toll-like receptor 13                                                     | 0,703591434 | 5,275345128 | 12,1773971   | 0,00092556  | 0,002311263 |
| selenoprotein X 1                                                         | 1,049213908 | 10,06369872 | 12,12302425  | 0,000943823 | 0,002353517 |
| vacuolar protein sorting 33A (yeast)                                      | 0,769401777 | 7,990430095 | 12,10571004  | 0,000949725 | 0,002364859 |
| suppressor of Ty 6 homolog (S. cerevisiae)                                | 0,755507115 | 10,94699787 | 12,10183974  | 0,00095107  | 0,002364859 |
| nuclear receptor coactivator 4                                            | 0,822852674 | 8,479017669 | 12,07470696  | 0,0009604   | 0,002384676 |
| CD8 antigen, alpha chain                                                  | 0,735613558 | 5,20005094  | 12,06223884  | 0,000964732 | 0,002392043 |
| major facilitator superfamily domain containing 10                        | 0,746091106 | 8,721590476 | 12,03942704  | 0,000972715 | 0,002405103 |
| ArfGAP with RhoGAP domain, ankyrin repeat and PH domain 1                 | 0,782185465 | 5,306928383 | 12,03934776  | 0,000972743 | 0,002405103 |
| integral membrane protein 2B                                              | 0,993392649 | 14,16318245 | 12,0298408   | 0,000976092 | 0,002406047 |
| solute carrier family 16 (monocarboxylic acid transporters), member 10    | 0,69482415  | 5,956232722 | 12,02972447  | 0,000976133 | 0,002406047 |
| ATP-binding cassette, sub-family A (ABC1), member 7                       | 0,766253991 | 9,403040651 | 12,02658577  | 0,000977242 | 0,002406047 |
| UDP-glucose pyrophosphorylase 2                                           | 1,10348529  | 7,175485105 | 12,01839774  | 0,000980142 | 0,002409801 |
| StAR-related lipid transfer (START) domain containing 5                   | 0,745296715 | 7,99614866  | 11,99487936  | 0,000988524 | 0,002427007 |
| eukaryotic translation elongation factor 2                                | 0,769854176 | 8,829242347 | 11,98385489  | 0,000992482 | 0,002433317 |
| histocompatibility 13                                                     | 1,090696549 | 8,031886343 | 11,97935964  | 0,000994101 | 0,002433882 |
| adenylosuccinate synthetase like 1                                        | 0,841729594 | 8,415811441 | 11,94583283  | 0,001006272 | 0,002460245 |
| nicotinate phosphoribosyltransferase domain containing 1                  | 0,908612284 | 5,562508787 | 11,93169088  | 0,001011457 | 0,002469477 |
| tumor necrosis factor, alpha-induced protein 2                            | 0,965026573 | 11,17316284 | 11,92692218  | 0,001013213 | 0,002470323 |
| CD151 antigen                                                             | 0,79836641  | 7,464528488 | 11,90170499  | 0,001022553 | 0,002489633 |
| chromatin licensing and DNA replication factor 1                          | 0,783878708 | 7,697375881 | 11,89569796  | 0,001024793 | 0,002491625 |
| ring finger protein 13                                                    | 0,777966841 | 7,910461138 | 11,87256448  | 0,00103347  | 0,002509243 |
| endoplasmic reticulum protein 29                                          | 0,888000822 | 12,54642122 | 11,85830665  | 0,00103886  | 0,002518841 |
| gasdermin D                                                               | 0,930778014 | 8,420543963 | 11,85196065  | 0,00104127  | 0,002521196 |
| nucleoredoxin                                                             | 0,775752272 | 5,215754075 | 11,84583283  | 0,001042909 | 0,002521681 |
| syntaxin binding protein 5 (tomosyn)                                      | 0,921251339 | 7,725441614 | 11,83216666  | 0,001048826 | 0,002532496 |
| protein inhibitor of activated STAT 1                                     | 0,868259631 | 9,405320644 | 11,82444633  | 0,001051791 | 0,002536161 |
| transmembrane protein 14C                                                 | 0,781542731 | 10,61032494 | 11,80954079  | 0,001057541 | 0,002543873 |
| mediator of RNA polymerase II transcription, subunit 12 homolog (yeast)   | 0,827429145 | 7,809461911 | 11,80537571  | 0,001059154 | 0,002543873 |
| cysteine sulfinic acid decarboxylase                                      | 0,765730643 | 6,082990987 | 11,80059     | 0,001061012 | 0,002543873 |
| sporulation protein, meiosis-specific, SPO11 homolog (S. cerevisiae)      | 0,9938141   | 6,947396943 | 11,798455    | 0,001061841 | 0,002543873 |
| DNA topoisomerase 1, mitochondrial                                        | 0,856717588 | 5,666546179 | 11,79741811  | 0,001062245 | 0,002543873 |
| NADH dehydrogenase (ubiquinone) 1 beta subcomplex 8                       | 0,996226254 | 12,09113015 | 11,74994486  | 0,001080896 | 0,002585008 |
| tumor necrosis factor receptor superfamily, member 18                     | 0,603445389 | 5,822669803 | 11,74197217  | 0,001084065 | 0,002589054 |
| catenin (cadherin associated protein), alpha 1                            | 0,950542987 | 13,56499955 | 11,71918483  | 0,001093181 | 0,002604097 |
| transmembrane protein 214                                                 | 0,904730247 | 5,322600363 | 11,7187407   | 0,00109336  | 0,002604097 |
| transient receptor potential cation channel, subfamily C, member 2        | 0,893075694 | 5,176207502 | 11,71331984  | 0,001095542 | 0,002604097 |
| YdjC homolog (bacterial)                                                  | 0,776170204 | 5,54284074  | 11,71142612  | 0,001096306 | 0,002604097 |
| proline dehydrogenase                                                     | 0,964800683 | 5,889472743 | 11,69116373  | 0,001104513 | 0,002620041 |
| predicted gene 962                                                        | 1,118695787 | 5,720818267 | 11,67010001  | 0,001113119 | 0,002635195 |
| expressed sequence C87436                                                 | 0,836724028 | 6,826252559 | 11,66817969  | 0,001113908 | 0,002635195 |
| transmembrane protein 87B                                                 | 0,765448975 | 6,381096135 | 11,63624954  | 0,001127112 | 0,002662839 |
| mitochondrial carrier homolog 2 (C. elegans)                              | 0,950224682 | 7,500712106 | 11,613395936 | 0,001136436 | 0,002681254 |
| solute carrier family 6 (neurotransmitter transporter, taurine), member 6 | 0,82710975  | 12,95133504 | 11,60621618  | 0,001139695 | 0,002685331 |
| protein inhibitor of activated STAT 1                                     | 0,846111143 | 9,501547327 | 11,58887605  | 0,001147034 | 0,002695613 |
| cyclin-dependent kinase 19                                                | 0,944770317 | 6,853334003 | 11,58863942  | 0,001147135 | 0,002695613 |
| RIKEN cDNA I830077J02 gene                                                | 0,911284476 | 6,207386963 | 11,57366293  | 0,001153517 | 0,002702772 |
| Yip1 interacting factor homolog A (S. cerevisiae)                         | 0,812196007 | 7,634659824 | 11,57274348  | 0,001153911 | 0,002702772 |
| PH domain and leucine rich repeat protein phosphatase 1                   | 0,896692842 | 5,696700149 | 11,56828691  | 0,001155819 | 0,002702772 |
| zinc finger protein 277                                                   | 0,997242702 | 5,960915068 | 11,56705047  | 0,001156349 | 0,002702772 |
| Kruppel-like factor 13                                                    | 0,909275238 | 6,563884211 | 11,56176233  | 0,001158618 | 0,002704471 |
| membrane-associated ring finger (C3HC4) 6                                 | 0,737400387 | 7,149268168 | 11,51730806  | 0,001177902 | 0,002743717 |
| ribosomal protein L38                                                     | 1,12610591  | 8,787148116 | 11,51272828  | 0,00117991  | 0,002743717 |
| profilin 2                                                                | 0,775623924 | 6,385198955 | 11,51223351  | 0,001180127 | 0,002743717 |
| DDRGG domain containing 1                                                 | 1,010561678 | 10,59700729 | 11,50704205  | 0,001182408 | 0,002745379 |
| polycomb group ring finger 1                                              | 0,836233217 | 8,629162231 | 11,49619542  | 0,00118719  | 0,002752836 |
| transmembrane protein 141                                                 | 0,81583197  | 6,948511858 | 11,48944536  | 0,001190177 | 0,002756116 |
| ectonucleotide pyrophosphatase/phosphodiesterase 1                        | 0,644773522 | 5,017375299 | 11,47164821  | 0,001198094 | 0,002770789 |
| transmembrane protein 43                                                  | 0,964919229 | 9,332495194 | 11,45667566  | 0,001204801 | 0,002782623 |
| E2F transcription factor 6                                                | 0,870272161 | 7,721708727 | 11,4471122   | 0,001209108 | 0,002788902 |
| meteorin, glial cell differentiation regulator                            | 0,765114346 | 5,420429114 | 11,44012931  | 0,001212263 | 0,002792507 |
| RAS p21 protein activator 2                                               | 1,11688296  | 7,297006454 | 11,43572172  | 0,00121426  | 0,002793436 |
| RIKEN cDNA 3110001D03 gene                                                | 0,889275087 | 10,25636351 | 11,43203289  | 0,001215934 | 0,002793621 |
| family with sequence similarity 50, member A                              | 0,768759891 | 9,506627443 | 11,4220104   | 0,001220496 | 0,002800431 |
| glutamate oxaloacetate transaminase 2, mitochondrial                      | 0,836162865 | 11,89771026 | 11,40332159  | 0,001229055 | 0,002816382 |
| Bernardinelli-Seip congenital lipodystrophy 2 homolog (human)             | 1,078905369 | 10,76144641 | 11,39910614  | 0,001230995 | 0,002817145 |
| nucleosome assembly protein 1-like 1                                      | 0,935551223 | 10,32544121 | 11,38510013  | 0,001237465 | 0,002828262 |
| TBC1 domain family, member 13                                             | 0,797017489 | 8,908258523 | 11,36872513  | 0,00124508  | 0,002841961 |

|                                                                                                |             |             |             |             |             |
|------------------------------------------------------------------------------------------------|-------------|-------------|-------------|-------------|-------------|
| purinergic receptor P2Y, G-protein coupled 1                                                   | 0,754643173 | 6,696291977 | 11,35920278 | 0,001249533 | 0,002848416 |
| Yip1 interacting factor homolog B ( <i>S. cerevisiae</i> )                                     | 0,904476473 | 9,403343024 | 11,35463018 | 0,001251678 | 0,0028496   |
| asparagine-linked glycosylation 8 homolog (yeast, alpha-1,3-glucosyltransferase)               | 1,002799901 | 5,286149123 | 11,34759184 | 0,001254988 | 0,002853429 |
| XRCC6 binding protein 1                                                                        | 0,796566558 | 7,372455563 | 11,33540196 | 0,001260744 | 0,002858275 |
| coiled-coil-helix-coiled-coil-helix domain containing 4                                        | 1,084291552 | 8,024350355 | 11,33318754 | 0,001261792 | 0,002858275 |
| transmembrane protein 147                                                                      | 0,817282596 | 10,09040342 | 11,33272707 | 0,001262011 | 0,002858275 |
| nicotinate phosphoribosyltransferase domain containing 1                                       | 1,1814517   | 7,874555164 | 11,32281242 | 0,00126672  | 0,002865238 |
| MTOR associated protein, LST8 homolog ( <i>S. cerevisiae</i> )                                 | 0,874044087 | 8,947272448 | 11,31469447 | 0,001270591 | 0,00287029  |
| reversion-inducing-cysteine-rich protein with kazal motifs                                     | 0,803542501 | 5,140097644 | 11,3010487  | 0,001277128 | 0,002881345 |
| aldo-keto reductase family 1, member A4 (aldehyde reductase)                                   | 0,974313821 | 12,89477047 | 11,29735961 | 0,001278902 | 0,002881638 |
| asparagine-linked glycosylation 5 homolog (yeast, dolichyl-phosphate beta-glucosyltransferase) | 0,916754632 | 9,84767065  | 11,29152161 | 0,001281715 | 0,00288427  |
| COX15 homolog, cytochrome c oxidase assembly protein (yeast)                                   | 0,825050445 | 7,721257604 | 11,27165605 | 0,00129134  | 0,002902204 |
| Spi-B transcription factor (Spi-1/PU.1 related)                                                | 0,762187407 | 5,009015187 | 11,25183381 | 0,001301027 | 0,002919717 |
| growth factor receptor bound protein 2-associated protein 3                                    | 0,735467988 | 4,761908695 | 11,24890934 | 0,001302464 | 0,002919717 |
| oligosaccharyltransferase 4 homolog ( <i>S. cerevisiae</i> )                                   | 1,114251684 | 7,48833263  | 11,23480904 | 0,001309414 | 0,00292972  |
| tRNA splicing endonuclease 15 homolog ( <i>S. cerevisiae</i> )                                 | 0,842943642 | 6,287399014 | 11,2330819  | 0,001310268 | 0,00292972  |
| serine palmitoyltransferase, long chain base subunit 1                                         | 0,791695776 | 8,887227768 | 11,22256702 | 0,001315483 | 0,002937632 |
| alpha 1,3-galactosyltransferase 2 (isoglobotriosylceramide synthase)                           | 0,69085638  | 5,458154261 | 11,21727895 | 0,001318114 | 0,002939764 |
| small cell adhesion glycoprotein                                                               | 0,828545789 | 5,261171675 | 11,18983115 | 0,001331871 | 0,00296667  |
| sigma non-opioid intracellular receptor 1                                                      | 0,673036729 | 6,754405978 | 11,18269795 | 0,001335472 | 0,002970918 |
| vitamin K epoxide reductase complex, subunit 1-like 1                                          | 0,737340889 | 7,518858064 | 11,16673199 | 0,001343575 | 0,002985154 |
| translocating chain-associating membrane protein 1                                             | 0,882726358 | 9,19892187  | 11,16028089 | 0,001346865 | 0,002988676 |
| Rab interacting lysosomal protein-like 2                                                       | 0,730183424 | 8,329734088 | 11,15547844 | 0,00134932  | 0,002990338 |
| mitochondrial ribosomal protein S26                                                            | 0,726113527 | 7,230266081 | 11,13849146 | 0,001358045 | 0,003005875 |
| BCL2-associated athanogene 3                                                                   | 0,805898784 | 10,87836614 | 11,13456388 | 0,001360072 | 0,003006564 |
| guanine nucleotide binding protein (G protein), beta 5                                         | 0,805576477 | 6,653911382 | 11,11693911 | 0,001369209 | 0,003020972 |
| rogdi homolog ( <i>Drosophila</i> )                                                            | 0,872730078 | 11,10052435 | 11,1153499  | 0,001370036 | 0,003020972 |
| SERTA domain containing 2                                                                      | 0,798481065 | 8,744578923 | 11,1071645  | 0,001374306 | 0,003026581 |
| oxoglutarate dehydrogenase (lipoamide)                                                         | 1,070592616 | 7,673463171 | 11,10115774 | 0,00137745  | 0,003029698 |
| kinase D-interacting substrate 220                                                             | 0,789751781 | 9,653523376 | 11,09125366 | 0,001382651 | 0,003037326 |
| family with sequence similarity 116, member A                                                  | 0,839074602 | 8,653271736 | 11,05920386 | 0,001399636 | 0,003064215 |
| protein phosphatase 3, catalytic subunit, beta isoform                                         | 0,888352878 | 9,885209601 | 11,05743442 | 0,001400581 | 0,003064215 |
| coiled-coil and C2 domain containing 2A                                                        | 1,12506012  | 7,023792109 | 11,05727174 | 0,001400668 | 0,003064215 |
| solute carrier family 17, member 9                                                             | 0,897338026 | 5,100341012 | 11,05499816 | 0,001401883 | 0,003064215 |
| CHK2 checkpoint homolog ( <i>S. pombe</i> )                                                    | 0,659219508 | 5,599947189 | 11,0319866  | 0,001414248 | 0,003087394 |
| sorting nexin 15                                                                               | 0,890254113 | 8,775184895 | 11,00657482 | 0,00142805  | 0,003113645 |
| dehydrogenase/reductase (SDR family) member 4                                                  | 0,906895314 | 5,682071015 | 10,99313155 | 0,001435413 | 0,003125812 |
| histone cluster 1, H4j                                                                         | 0,724009982 | 6,49645455  | 10,98576797 | 0,001439465 | 0,003130747 |
| small nucleolar RNA, H/ACA box 65                                                              | 0,927783907 | 5,812607372 | 10,96770908 | 0,001449457 | 0,003148573 |
| major facilitator superfamily domain containing 11                                             | 0,782047608 | 6,997517664 | 10,95551132 | 0,001456252 | 0,003159418 |
| eyes absent 3 homolog ( <i>Drosophila</i> )                                                    | 0,75506416  | 5,221157831 | 10,94442656 | 0,001462458 | 0,00316896  |
| solute carrier family 9 (sodium/hydrogen exchanger), member 1                                  | 0,788302579 | 9,112411118 | 10,92438543 | 0,001473756 | 0,003189499 |
| H3 histone, family 3A                                                                          | 0,979151903 | 12,57265518 | 10,91949132 | 0,00147653  | 0,003191562 |
| transmembrane protein 150A                                                                     | 0,729716724 | 6,136137468 | 10,91024177 | 0,001481789 | 0,003198986 |
| TNF receptor-associated protein 1                                                              | 0,869399979 | 8,539716192 | 10,88733463 | 0,001494907 | 0,003223336 |
| general transcription factor II H, polypeptide 1                                               | 0,776570291 | 10,00223423 | 10,88114176 | 0,001498476 | 0,003227062 |
| ATPase, H+ transporting, lysosomal V1 subunit H                                                | 0,956386018 | 10,58826983 | 10,86658613 | 0,001506904 | 0,003237934 |
| LanC (bacterial lantibiotic synthetase component C)-like 2                                     | 1,127050998 | 6,798187656 | 10,86604388 | 0,001507219 | 0,003237934 |
| transmembrane channel-like gene family 6                                                       | 0,881276924 | 7,28559529  | 10,85357433 | 0,001514483 | 0,003249559 |
| MTOR associated protein, LST8 homolog ( <i>S. cerevisiae</i> )                                 | 0,774689497 | 8,333030659 | 10,84823132 | 0,001517608 | 0,003252283 |
| aminopeptidase-like 1                                                                          | 0,768936285 | 7,500837006 | 10,82614722 | 0,001530604 | 0,003276128 |
| DNA cross-link repair 1C, PSO2 homolog ( <i>S. cerevisiae</i> )                                | 1,047374368 | 5,865839673 | 10,81959086 | 0,001534487 | 0,003280433 |
| PQ loop repeat containing                                                                      | 0,817874873 | 10,31668173 | 10,81509619 | 0,001537155 | 0,003282135 |
| solute carrier family 41, member 3                                                             | 0,712581128 | 5,93423717  | 10,80235659 | 0,001544747 | 0,003294332 |
| programmed cell death 4                                                                        | 0,734680939 | 9,046404555 | 10,79296074 | 0,001550373 | 0,003302314 |
| cDNA sequence BC067068                                                                         | 0,801790941 | 5,654114356 | 10,78639752 | 0,001554318 | 0,003306698 |
| actin related protein 2/3 complex, subunit 1B                                                  | 0,808389063 | 11,64462674 | 10,77753611 | 0,001559662 | 0,003314045 |
| inositol polyphosphate 5-phosphatase K                                                         | 0,881690606 | 11,18147201 | 10,75939783 | 0,001570666 | 0,00332595  |
| Yip1 interacting factor homolog A ( <i>S. cerevisiae</i> )                                     | 0,959140963 | 8,853772051 | 10,7568903  | 0,001572194 | 0,003332595 |
| aconitase 2, mitochondrial                                                                     | 0,798377476 | 8,862647589 | 10,74490382 | 0,001579523 | 0,003344086 |
| tubulin, beta 2B                                                                               | 0,952560218 | 5,482399454 | 10,73403423 | 0,001586203 | 0,003354177 |
| mitochondrial carrier homolog 2 ( <i>C. elegans</i> )                                          | 0,956218938 | 7,428428438 | 10,70503508 | 0,001604183 | 0,003388112 |
| zinc and ring finger 2                                                                         | 0,809562193 | 9,468391748 | 10,6993955  | 0,001607707 | 0,003388556 |
| mitochondrial ribosomal protein L48                                                            | 1,046220558 | 9,208967237 | 10,69851207 | 0,00160826  | 0,003388556 |
| Ras interacting protein 1                                                                      | 0,939677883 | 5,768881729 | 10,69111678 | 0,001612896 | 0,003394245 |
| influenza virus NS1A binding protein                                                           | 0,896032175 | 9,599221283 | 10,65424161 | 0,001636243 | 0,003439249 |
| dehydrogenase/reductase (SDR family) X chromosome                                              | 1,050278872 | 7,494827404 | 10,63219219 | 0,001650388 | 0,003460501 |
| Fas-associated factor 1                                                                        | 1,16080797  | 5,769934567 | 10,62998195 | 0,001651814 | 0,003460501 |
| predicted gene 4076                                                                            | 0,876413188 | 9,974305803 | 10,62926661 | 0,001652275 | 0,003460501 |
| methyl-CpG binding domain protein 3                                                            | 0,836976698 | 6,887962992 | 10,62518083 | 0,001654915 | 0,003461894 |
| centromere protein B                                                                           | 0,899612888 | 10,30945509 | 10,61340629 | 0,001662551 | 0,003472883 |
| degenerative spermatocyte homolog 1 ( <i>Drosophila</i> )                                      | 0,796243637 | 12,10310842 | 10,61097696 | 0,001664131 | 0,003472883 |
| thrombospondin 2                                                                               | 1,033126141 | 5,05648926  | 10,60566243 | 0,001667594 | 0,003475972 |
| importin 5                                                                                     | 0,825588146 | 7,771178891 | 10,5957278  | 0,00167409  | 0,003485368 |
| ArfGAP with dual PH domains 2                                                                  | 0,719069535 | 5,72328241  | 10,59120745 | 0,001677055 | 0,003486353 |
| cysteine and glycine-rich protein 2 binding protein                                            | 0,802191441 | 8,992763869 | 10,5889468  | 0,001678541 | 0,003486353 |
| BCL6 interacting corepressor                                                                   | 0,790441199 | 6,428519033 | 10,57116172 | 0,001690278 | 0,003504841 |
| hydroxyacylglutathione hydrolase-like                                                          | 0,87167845  | 9,851702716 | 10,56940796 | 0,001691441 | 0,003504841 |
| ubiquitin-like 3                                                                               | 0,883194569 | 10,56085759 | 10,56472061 | 0,001694552 | 0,003505491 |
| CDC like kinase 4                                                                              | 0,827673198 | 10,29928709 | 10,5629132  | 0,001695754 | 0,003505491 |
| LIM and SH3 protein 1                                                                          | 0,800677753 | 12,1514942  | 10,54362341 | 0,001708639 | 0,003523253 |

|                                                                                              |             |             |             |             |             |
|----------------------------------------------------------------------------------------------|-------------|-------------|-------------|-------------|-------------|
| aarF domain containing kinase 5                                                              | 0,993905977 | 7,157079189 | 10,54293562 | 0,0017091   | 0,003523253 |
| baculoviral IAP repeat-containing 5                                                          | 0,709079191 | 5,198490146 | 10,54103557 | 0,001710376 | 0,003523253 |
| clathrin, light polypeptide (Lca)                                                            | 0,908853236 | 12,2556212  | 10,53406826 | 0,001715063 | 0,003523309 |
| nucleoporin 214                                                                              | 0,812184463 | 6,254451903 | 10,53220171 | 0,001716321 | 0,003523309 |
| tuberous sclerosis 2                                                                         | 0,861429027 | 8,904210601 | 10,53203621 | 0,001716432 | 0,003523309 |
| eukaryotic translation elongation factor 1 gamma                                             | 0,799677767 | 13,07943857 | 10,52834419 | 0,001718924 | 0,003524297 |
| extended synaptotagmin-like protein 2                                                        | 0,774503953 | 5,99176912  | 10,52498038 | 0,001721198 | 0,003524837 |
| tumor protein D52                                                                            | 0,744132643 | 11,49242892 | 10,51621081 | 0,001727143 | 0,003532883 |
| carbohydrate (N-acetylglucosamine) sulfotransferase 7                                        | 0,891686911 | 8,980396697 | 10,51018899 | 0,001731238 | 0,003537134 |
| tRNA methyltransferase 61 homolog A (S. cerevisiae)                                          | 0,837839568 | 7,603708636 | 10,50697744 | 0,001733427 | 0,003537483 |
| RasGEF domain family, member 1A                                                              | 0,720405043 | 4,861771262 | 10,50343223 | 0,001735847 | 0,003538302 |
| asparagine-linked glycosylation 3 homolog (yeast, alpha-1,3-mannosyltransferase)             | 0,958282923 | 6,419511177 | 10,49388687 | 0,001742382 | 0,003547497 |
| SET domain containing (lysine methyltransferase) 8                                           | 0,909248331 | 7,67558981  | 10,49061691 | 0,001744627 | 0,003547948 |
| ankyrin repeat domain 13b                                                                    | 0,707601203 | 4,966636663 | 10,47636263 | 0,001754452 | 0,003562558 |
| tubulin, beta 2B                                                                             | 0,801433896 | 5,144272158 | 10,47430551 | 0,001755876 | 0,003562558 |
| arylfornamidase                                                                              | 0,712329725 | 5,60296753  | 10,46788724 | 0,001760325 | 0,003567456 |
| arginyltransferase 1                                                                         | 0,942460907 | 9,015112472 | 10,46033448 | 0,001765577 | 0,003571301 |
| RIKEN cDNA 1300010F03 gene                                                                   | 0,867390371 | 4,901766865 | 10,43858863 | 0,001766296 | 0,003571301 |
| minichromosome maintenance deficient 5, cell division cycle 46 (S. cerevisiae)               | 0,934480467 | 8,155607033 | 10,45596494 | 0,001768623 | 0,003571886 |
| DAZ associated protein 1                                                                     | 0,858665522 | 10,46111692 | 10,45249581 | 0,001771046 | 0,003572663 |
| WW domain binding protein 1                                                                  | 0,797247001 | 7,061775822 | 10,40407664 | 0,001805267 | 0,00363751  |
| amyloid beta (A4) precursor protein-binding, family B, member 1 interacting protein          | 1,042530012 | 6,257873094 | 10,38671128 | 0,001817725 | 0,003658406 |
| selectin, platelet (p-selectin) ligand                                                       | 0,870029903 | 9,575036454 | 10,38023714 | 0,001822394 | 0,003663597 |
| SH3 domain binding glutamic acid-rich protein-like 3                                         | 0,859489373 | 13,41193516 | 10,36950185 | 0,001830168 | 0,00367501  |
| chemokine (C-X-C motif) ligand 14                                                            | 0,797758627 | 5,067431113 | 10,36413101 | 0,001834071 | 0,003678634 |
| TSPY-like 3                                                                                  | 0,947025801 | 7,460910633 | 10,30904132 | 0,001854975 | 0,003716309 |
| family with sequence similarity 13, member B                                                 | 0,779772518 | 8,544002898 | 10,31692113 | 0,001868794 | 0,003738547 |
| abhydrolase domain containing 11                                                             | 0,950782302 | 7,288176094 | 10,31484316 | 0,00187034  | 0,003738547 |
| DEAD (Asp-Glu-Ala-Asp) box polypeptide 18                                                    | 0,868165163 | 9,706299741 | 10,30981072 | 0,001874089 | 0,003738653 |
| leukocyte immunoglobulin-like receptor subfamily A member 2-like                             | 1,095701336 | 5,429875145 | 10,30904748 | 0,001874658 | 0,003738653 |
| actin, beta                                                                                  | 0,7977856   | 10,09653581 | 10,3055443  | 0,001877274 | 0,00373949  |
| solute carrier family 35, member C2                                                          | 0,72959925  | 6,808847198 | 10,30158498 | 0,001880236 | 0,00373949  |
| succinate-CoA ligase, GDP-forming, alpha subunit                                             | 0,923417982 | 11,11325258 | 10,29992748 | 0,001881477 | 0,00373949  |
| envelope glycoprotein-like                                                                   | 0,86462297  | 11,02931222 | 10,29303479 | 0,00188665  | 0,003744359 |
| RIKEN cDNA 9430015G10 gene                                                                   | 0,609868299 | 5,586776489 | 10,29097402 | 0,001888199 | 0,003744359 |
| tumor necrosis factor, alpha-induced protein 2                                               | 0,998507684 | 9,4054205   | 10,27577324 | 0,001899675 | 0,003762859 |
| NCK associated protein 1 like                                                                | 0,846511012 | 11,25962469 | 10,2674411  | 0,001905999 | 0,003771125 |
| MTOR associated protein, LST8 homolog (S. cerevisiae)                                        | 0,8543376   | 9,051569378 | 10,26428561 | 0,0019084   | 0,003771619 |
| interleukin-1 receptor-associated kinase 4                                                   | 1,015283847 | 5,98352593  | 10,22117431 | 0,001941558 | 0,003832828 |
| ryanodine receptor 3                                                                         | 0,717622493 | 4,847725117 | 10,21721357 | 0,001944637 | 0,003834589 |
| sortilin-related receptor, LDLR class A repeats-containing                                   | 0,685586861 | 7,050171219 | 10,20931057 | 0,001950798 | 0,003842415 |
| phenylalanyl-tRNA synthetase, beta subunit                                                   | 0,90741147  | 9,631406931 | 10,18670172 | 0,001960674 | 0,003857533 |
| granule cell antiserum positive 14                                                           | 0,813739752 | 9,478963938 | 10,18747711 | 0,001967936 | 0,003867479 |
| methylenetetrahydrofolate dehydrogenase (NAD+ dependent), methylenetetrahydrofolate cyclohyd | 0,901316472 | 12,51361953 | 10,15489326 | 0,001993833 | 0,003913588 |
| tumor necrosis factor receptor superfamily, member 26                                        | 0,773666125 | 5,367207512 | 10,15236014 | 0,001995863 | 0,003913588 |
| cytidine 5'-triphosphate synthase 2                                                          | 0,883802247 | 5,698445383 | 10,1440763  | 0,002002517 | 0,003922248 |
| succinate dehydrogenase complex assembly factor 1                                            | 0,960135813 | 9,209510218 | 10,13990907 | 0,002005874 | 0,003924438 |
| lysosomal-associated membrane protein 2                                                      | 0,989826222 | 11,46253677 | 10,13519183 | 0,002009681 | 0,003927504 |
| erythrocyte protein band 4.9                                                                 | 0,690059746 | 4,771516983 | 10,12329913 | 0,002019318 | 0,003940326 |
| solute carrier family 25 (mitochondrial carrier, adenine nucleotide translocator), member 5  | 0,852938572 | 12,97508367 | 10,12155262 | 0,002020738 | 0,003940326 |
| pyruvate dehydrogenase phosphatase catalytic subunit 1                                       | 0,92139465  | 5,710175979 | 10,11345246 | 0,002027337 | 0,003948802 |
| ATPase family, AAA domain containing 3A                                                      | 1,108409498 | 8,195463378 | 10,10894871 | 0,002031017 | 0,003951579 |
| cytochrome c oxidase, subunit Va                                                             | 0,916065372 | 12,43417201 | 10,08538485 | 0,002050395 | 0,003984859 |
| poliovirus receptor-related 1                                                                | 0,990272466 | 5,223092648 | 10,08182823 | 0,002053339 | 0,003985099 |
| glucuronidase, beta                                                                          | 0,963988505 | 8,655347447 | 10,07974467 | 0,002055065 | 0,003985099 |
| nudix (nucleoside diphosphate linked moiety X)-type motif 8                                  | 0,928186834 | 7,026362904 | 10,07620611 | 0,002058001 | 0,003986382 |
| defender against cell death 1                                                                | 0,959284608 | 11,01071435 | 10,06718669 | 0,002065506 | 0,003996504 |
| lysophosphatidylcholine acyltransferase 3                                                    | 0,716561271 | 8,127920116 | 10,04429726 | 0,002084695 | 0,004027334 |
| DPH3 homolog (KTI11, S. cerevisiae)                                                          | 1,057298076 | 6,152347453 | 10,04270778 | 0,002086035 | 0,004027334 |
| RAB39, member RAS oncogene family                                                            | 1,104902958 | 5,684053012 | 10,03451727 | 0,002092956 | 0,004033912 |
| acyl-Coenzyme A dehydrogenase, very long chain                                               | 0,838595433 | 7,563381371 | 10,03323115 | 0,002094045 | 0,004033912 |
| vitamin K epoxide reductase complex, subunit 1-like 1                                        | 0,86510126  | 9,211253123 | 10,02083717 | 0,002104574 | 0,004049745 |
| DnaJ (Hsp40) homolog, subfamily C, member 2                                                  | 0,929337551 | 9,077671396 | 10,01223766 | 0,002111915 | 0,004059416 |
| RIKEN cDNA 2810407C02 gene                                                                   | 0,966240347 | 10,73389662 | 9,997716536 | 0,002124378 | 0,004078899 |
| cytochrome b5 reductase 4                                                                    | 1,057932218 | 9,717125767 | 9,987866833 | 0,00213288  | 0,004090742 |
| protein tyrosine phosphatase, receptor type, O                                               | 0,706471564 | 6,656057217 | 9,964489979 | 0,002153214 | 0,004125229 |
| ribosome binding protein 1                                                                   | 0,998347844 | 8,222292943 | 9,951596192 | 0,002164525 | 0,004142372 |
| steroid 5 alpha-reductase 3                                                                  | 0,980248438 | 9,086095597 | 9,9398152   | 0,002174919 | 0,004157725 |
| tRNA splicing endonuclease 15 homolog (S. cerevisiae)                                        | 1,026908442 | 7,33332791  | 9,926421574 | 0,002186806 | 0,004168057 |
| amyloid beta (A4) precursor protein-binding, family B, member 1 interacting protein          | 0,947164818 | 6,347826945 | 9,926109576 | 0,002187084 | 0,004168057 |
| solute carrier family 29 (nucleoside transporters), member 1                                 | 0,945919371 | 4,82203969  | 9,924749022 | 0,002188296 | 0,004168057 |
| tripartite motif-containing 33                                                               | 1,008950554 | 6,93764869  | 9,923022134 | 0,002189835 | 0,004168057 |
| opioid growth factor receptor-like 1                                                         | 0,986809858 | 10,41788375 | 9,908183935 | 0,002203112 | 0,004188779 |
| glutathione transferase zeta 1 (maleylacetoacetate isomerase)                                | 1,014195647 | 7,014350192 | 9,893858166 | 0,002216017 | 0,004208753 |
| solute carrier family 35, member A5                                                          | 0,906340927 | 4,756152172 | 9,871622499 | 0,002236221 | 0,004242528 |
| RIKEN cDNA 1110018J18 gene                                                                   | 0,783626584 | 5,733858619 | 9,864475435 | 0,00224276  | 0,004249279 |
| deltex 4 homolog (Drosophila)                                                                | 0,928523222 | 6,348389296 | 9,862438819 | 0,002244628 | 0,004249279 |
| RIKEN cDNA 6330578E17 gene                                                                   | 0,905105178 | 10,18855333 | 9,852149636 | 0,002254089 | 0,004262586 |
| zinc finger, DHHC domain containing 9                                                        | 0,789309267 | 6,119157866 | 9,835906232 | 0,002269118 | 0,004281894 |
| phosphatase, orphan 1                                                                        | 0,79753181  | 4,833769539 | 9,835835196 | 0,002269184 | 0,004281894 |
| general transcription factor III A                                                           | 0,960835279 | 8,781427183 | 9,827450244 | 0,002276987 | 0,004291999 |

|                                                                                           |             |             |             |             |             |
|-------------------------------------------------------------------------------------------|-------------|-------------|-------------|-------------|-------------|
| ubiquitin specific peptidase 36                                                           | 0,900535284 | 5,995860127 | 9,816745183 | 0,002286995 | 0,004306232 |
| FYVE, RhoGEF and PH domain containing 4                                                   | 0,861232863 | 5,018124002 | 9,811205169 | 0,002292194 | 0,00431139  |
| MYC binding protein 2                                                                     | 0,832207026 | 8,051310696 | 9,796120963 | 0,002306418 | 0,004333494 |
| phosphoribosylglycinamide formyltransferase family with sequence similarity 116, member A | 0,830904794 | 6,995882897 | 9,789433026 | 0,002312757 | 0,004340752 |
| transmembrane protein 43                                                                  | 0,802411703 | 6,845913725 | 9,784129936 | 0,002317797 | 0,004345556 |
| TRAF3 interacting protein 3                                                               | 0,849322801 | 8,968669203 | 9,75347937  | 0,002347218 | 0,004396018 |
| eukaryotic translation initiation factor 3, subunit B                                     | 0,72919165  | 5,361268461 | 9,742589412 | 0,00235772  | 0,004410974 |
| solute carrier family 36 (proton/amino acid symporter), member 1                          | 0,885987    | 7,502896602 | 9,724146486 | 0,002375697 | 0,004439868 |
| eukaryotic translation initiation factor 3, subunit L                                     | 0,998077178 | 5,716181381 | 9,716929538 | 0,002382774 | 0,004448352 |
| NUAK family, SNF1-like kinase, 1                                                          | 0,854324712 | 10,35765353 | 9,711798394 | 0,002387882 | 0,004453031 |
| ceroid lipofuscinosis, neuronal 3, juvenile (Batten, Spielmeyer-Vogt disease)             | 0,787077277 | 7,697641275 | 9,705189946 | 0,002394338 | 0,004458018 |
| ceroid-lipofuscinosis, neuronal 6                                                         | 0,782414464 | 9,632990361 | 9,703932264 | 0,002395581 | 0,004458018 |
| mitochondrial ribosomal protein L11                                                       | 0,713530943 | 5,699610734 | 9,696448759 | 0,002402991 | 0,004467065 |
| zinc finger protein 787                                                                   | 0,842154765 | 8,510826711 | 9,666386687 | 0,002433022 | 0,004513277 |
| ribosomal protein S27A                                                                    | 0,815788308 | 9,51184861  | 9,666150576 | 0,00243326  | 0,004513277 |
| branched chain ketoacid dehydrogenase kinase                                              | 0,899682368 | 8,981579167 | 9,663852685 | 0,002435573 | 0,004513277 |
| eukaryotic translation initiation factor 3, subunit L                                     | 0,881691471 | 7,981014247 | 9,643967935 | 0,002455699 | 0,004545765 |
| UHRF1 (ICBP90) binding protein 1                                                          | 0,939253097 | 11,48458856 | 9,638670184 | 0,002461093 | 0,004550944 |
| epidermal growth factor receptor pathway substrate 15-like 1                              | 0,7268537   | 7,224741297 | 9,620956799 | 0,002479227 | 0,004579646 |
| myxovirus (influenza virus) resistance 1                                                  | 0,769447597 | 7,898920865 | 9,603572733 | 0,002497173 | 0,004604125 |
| Coenzyme A synthase                                                                       | 0,899184129 | 8,769704172 | 9,603033983 | 0,002497731 | 0,004604125 |
| netrin 5                                                                                  | 0,997591087 | 7,852136589 | 9,562306766 | 0,002519224 | 0,004638865 |
| ATG13 autophagy related 13 homolog (S. cerevisiae)                                        | 0,808456032 | 5,187080047 | 9,545496001 | 0,002558216 | 0,004705721 |
| zinc finger protein 518B                                                                  | 0,749719399 | 7,109914709 | 9,53132779  | 0,002573366 | 0,004728628 |
| glucosidase, alpha, acid                                                                  | 0,803240401 | 7,08486485  | 9,52077063  | 0,002584722 | 0,004736236 |
| RIKEN cDNA 2410002F23 gene                                                                | 0,859125883 | 8,391323247 | 9,520233629 | 0,002585301 | 0,004736236 |
| pitrilysin metallopeptidase 1                                                             | 0,714634717 | 6,424614421 | 9,519945361 | 0,002585612 | 0,004736236 |
| ribosomal protein S2                                                                      | 0,884035262 | 8,313650535 | 9,514073487 | 0,002591956 | 0,0047429   |
| circadian locomotor output cycles kaput                                                   | 0,944666328 | 13,6623786  | 9,504040677 | 0,002602836 | 0,004757843 |
| WW domain binding protein 1                                                               | 0,837281387 | 8,114670528 | 9,482781667 | 0,002626064 | 0,004795301 |
| RAS protein activator like 2                                                              | 0,758960662 | 6,733599159 | 9,47449819  | 0,002635178 | 0,004803359 |
| 40S ribosomal protein SA-like                                                             | 0,818734708 | 5,400807828 | 9,473792872 | 0,002635956 | 0,004803359 |
| DEAH (Asp-Glu-Ala-His) box polypeptide 35                                                 | 0,795061434 | 9,580703735 | 9,466385782 | 0,00264414  | 0,004813269 |
| exosome component 7                                                                       | 0,93433779  | 6,959343538 | 9,463649508 | 0,002658281 | 0,004833399 |
| WD repeat and SOCS box-containing 1                                                       | 0,924129852 | 10,16476043 | 9,429168537 | 0,002685705 | 0,004878798 |
| ATPase, class V, type 10D                                                                 | 0,757980129 | 9,230636646 | 9,399827437 | 0,002719002 | 0,004928958 |
| TGF-beta activated kinase 1/MAP3K7 binding protein 1                                      | 0,872817161 | 7,246202903 | 9,399655493 | 0,002719198 | 0,004928958 |
| hematological and neurological expressed sequence 1                                       | 0,772475807 | 8,347540775 | 9,397422381 | 0,002721752 | 0,004928958 |
| vitamin K epoxide reductase complex, subunit 1                                            | 0,927183271 | 12,69511494 | 9,380850298 | 0,00274079  | 0,004958312 |
| RIKEN cDNA 3110021A11 gene                                                                | 0,770845603 | 8,632390266 | 9,371816561 | 0,002751232 | 0,004970112 |
| translocase of inner mitochondrial membrane 9 homolog (yeast)                             | 0,952036912 | 5,527260534 | 9,370305696 | 0,002752983 | 0,004970112 |
| predicted gene 4130                                                                       | 0,893827612 | 9,094611478 | 9,363396103 | 0,002761006 | 0,004979469 |
| tectonin beta-propeller repeat containing 2                                               | 0,828889641 | 12,86055044 | 9,343430862 | 0,002784341 | 0,005013009 |
| RIKEN cDNA A130077B15 gene                                                                | 0,770136702 | 5,555410909 | 9,342594542 | 0,002785323 | 0,005013009 |
| epithelial membrane protein 2                                                             | 0,739280331 | 8,552210462 | 9,336571961 | 0,002792409 | 0,005020608 |
| ATPase, Ca++ transporting, plasma membrane 1                                              | 0,678769376 | 6,086618375 | 9,323201806 | 0,002797309 | 0,005024264 |
| RAB43, member RAS oncogene family                                                         | 0,72937225  | 6,144605193 | 9,316678198 | 0,002815964 | 0,005052594 |
| DNA segment, Chr 19, Wayne State University 162, expressed                                | 0,802655313 | 6,8289543   | 9,304719993 | 0,002830232 | 0,005073002 |
| adenylate kinase 3                                                                        | 0,784765271 | 10,69020104 | 9,293541839 | 0,002843644 | 0,005091837 |
| peter pan homolog (Drosophila)                                                            | 0,796113789 | 7,566126581 | 9,28230797  | 0,002857532 | 0,005111484 |
| pseudouridylylase synthase 7 homolog (S. cerevisiae)-like                                 | 0,826680438 | 8,235724187 | 9,279557309 | 0,002860527 | 0,005111624 |
| ubiquitin associated domain containing 2                                                  | 1,04680848  | 6,512694224 | 9,273448904 | 0,002867937 | 0,005117469 |
| purinergic receptor P2X, ligand-gated ion channel 4                                       | 1,070840776 | 9,027269405 | 9,271662678 | 0,002870108 | 0,005117469 |
| influenza virus NS1A binding protein                                                      | 0,813689662 | 8,564466546 | 9,269651131 | 0,002872555 | 0,005117469 |
| protein phosphatase 1, regulatory (inhibitor) subunit 14B                                 | 0,789332433 | 7,691458954 | 9,262462853 | 0,00288132  | 0,005127872 |
| transmembrane protein 57                                                                  | 1,021105616 | 8,965683498 | 9,256493928 | 0,002888621 | 0,005133226 |
| transmembrane protein 180                                                                 | 0,881415951 | 8,269517835 | 9,254603927 | 0,002890938 | 0,005133226 |
| CD99 antigen-like 2                                                                       | 0,778078991 | 6,58283056  | 9,252353615 | 0,002893698 | 0,005133226 |
| TBC1 domain family, member 23                                                             | 0,880196692 | 6,782790095 | 9,25044564  | 0,002896041 | 0,005133226 |
| FK506 binding protein 2                                                                   | 1,011625214 | 7,087642024 | 9,240016076 | 0,002908888 | 0,005150788 |
| peptidoglycan recognition protein 1                                                       | 1,031825238 | 8,913479817 | 9,219452541 | 0,002934408 | 0,005190734 |
| RIKEN cDNA 2610035D17 gene                                                                | 0,806998045 | 5,103419162 | 9,193250617 | 0,002967299 | 0,005243624 |
| hydroxysteroid (17-beta) dehydrogenase 10                                                 | 0,651151703 | 5,600917393 | 9,177874697 | 0,002986797 | 0,005272764 |
| ER lipid raft associated 1                                                                | 0,741709222 | 9,081958326 | 9,166938618 | 0,003000754 | 0,005292074 |
| cereblon                                                                                  | 0,961305281 | 8,715856737 | 9,15302702  | 0,003018617 | 0,005318227 |
| dead end homolog 1 (zebrafish)                                                            | 0,990809509 | 4,949933089 | 9,149652328 | 0,003022969 | 0,005320546 |
| dihydrouridine synthase 3-like (S. cerevisiae)                                            | 0,806237972 | 5,730597633 | 9,139508284 | 0,003036093 | 0,005338285 |
| eukaryotic translation elongation factor 1 gamma                                          | 0,710188569 | 6,43773064  | 9,133972359 | 0,003043282 | 0,005345565 |
| absent in melanoma 1                                                                      | 0,855576202 | 11,52960148 | 9,120878268 | 0,003060366 | 0,005368983 |
| chromatin assembly factor 1, subunit A (p150)                                             | 0,759962894 | 9,743548316 | 9,119065025 | 0,00306274  | 0,005368983 |
| cytochrome b5 reductase 4                                                                 | 0,937024772 | 5,402456586 | 9,114409255 | 0,003068846 | 0,005371715 |
| RIKEN cDNA 5033430115 gene                                                                | 1,067015874 | 9,949098969 | 9,113205615 | 0,003070427 | 0,005371715 |
| thymosin, beta 10                                                                         | 1,105381093 | 7,167822141 | 9,110658046 | 0,003073776 | 0,005372213 |
| ArfGAP with dual PH domains 1                                                             | 0,783398398 | 13,52193166 | 9,096820552 | 0,003092041 | 0,005398752 |
| solute carrier family 25, member 47                                                       | 0,783719835 | 7,21706182  | 9,091693167 | 0,00309884  | 0,00540524  |
| phosphatidylinositol glycan anchor biosynthesis, class A                                  | 0,725386347 | 5,81453096  | 9,082552103 | 0,003111004 | 0,005421064 |
| RIKEN cDNA 1110018J18 gene                                                                | 1,034842329 | 6,638907447 | 9,053499924 | 0,00315003  | 0,005480506 |
| neuroblastoma amplified sequence                                                          | 0,890284131 | 5,936120715 | 9,052510338 | 0,003151369 | 0,005480506 |
| gem (nuclear organelle) associated protein 4                                              | 0,984812658 | 5,928537451 | 9,027900449 | 0,003184884 | 0,005533302 |
| ATX1 (antioxidant protein 1) homolog 1 (yeast)                                            | 0,837050801 | 7,067382515 | 9,025471423 | 0,003188214 | 0,005533603 |
|                                                                                           | 0,817896117 | 12,3241281  | 9,020147505 | 0,003195527 | 0,005540809 |

|                                                                                             |             |             |             |             |             |
|---------------------------------------------------------------------------------------------|-------------|-------------|-------------|-------------|-------------|
| ATPase, Na <sup>+</sup> /K <sup>+</sup> transporting, alpha 1 polypeptide                   | 0,774574814 | 11,78966654 | 9,014289507 | 0,003203595 | 0,005549311 |
| ataxia telangiectasia mutated homolog (human)                                               | 0,834372646 | 7,559834313 | 8,997644438 | 0,003226649 | 0,005583728 |
| cell cycle progression 1                                                                    | 0,75652616  | 9,348220513 | 8,988122849 | 0,003239922 | 0,005596523 |
| protein tyrosine phosphatase, non-receptor type 18                                          | 0,654197423 | 6,349610431 | 8,987760692 | 0,003240429 | 0,005596523 |
| intraflagellar transport 81 homolog (Chlamydomonas)                                         | 0,79999545  | 7,33426029  | 8,984149243 | 0,00324548  | 0,005599731 |
| carbonic anhydrase 5b, mitochondrial                                                        | 0,675095812 | 5,25135956  | 8,978465706 | 0,003253449 | 0,00560796  |
| solute carrier family 31, member 1                                                          | 0,965466813 | 7,522917266 | 8,975668502 | 0,003257379 | 0,005609219 |
| RIKEN cDNA Z310033P09 gene                                                                  | 1,044922025 | 5,221802046 | 8,962227951 | 0,003276338 | 0,005636633 |
| zinc finger, AN1-type domain 6                                                              | 0,873465461 | 11,42193683 | 8,959551158 | 0,003285236 | 0,005646096 |
| RIKEN cDNA 1300017J02 gene                                                                  | 0,767270556 | 4,758482877 | 8,946721118 | 0,00329837  | 0,005653229 |
| regulator of G-protein signaling 3                                                          | 0,90475151  | 7,278891484 | 8,946552043 | 0,003298611 | 0,005653229 |
| RIKEN cDNA A230045G11 gene                                                                  | 0,724428264 | 7,510431321 | 8,945828566 | 0,003299643 | 0,005653229 |
| transmembrane protein 176B                                                                  | 1,072061301 | 12,08103331 | 8,943977409 | 0,003302286 | 0,005653229 |
| ficolin A                                                                                   | 0,721455936 | 4,957496703 | 8,931672402 | 0,003319913 | 0,00567503  |
| transmembrane protein 141                                                                   | 0,773446869 | 7,768326327 | 8,930572054 | 0,003321495 | 0,00567503  |
| opioid growth factor receptor-like 1                                                        | 0,916274417 | 11,97213041 | 8,91639257  | 0,003341953 | 0,005704424 |
| pleckstrin homology domain containing, family G (with RhoGef domain)                        | 0,664370265 | 5,748098885 | 8,908003283 | 0,003354125 | 0,005715232 |
| hematological and neurological expressed 1-like                                             | 0,919336161 | 7,060413266 | 8,907535057 | 0,003354806 | 0,005715232 |
| solute carrier family 35, member C1                                                         | 0,775717559 | 6,559068278 | 8,891903725 | 0,003377626 | 0,005743815 |
| vaccinia related kinase 1                                                                   | 0,957534097 | 5,382528869 | 8,891555688 | 0,003378136 | 0,005743815 |
| C-type lectin domain family 5, member a                                                     | 1,124805274 | 5,915262275 | 8,875224712 | 0,003402173 | 0,005779078 |
| mitochondrial ribosomal protein L48                                                         | 1,086061347 | 9,118026467 | 8,851623957 | 0,003437257 | 0,005833021 |
| glycerophosphodiester phosphodiesterase domain containing 1                                 | 1,007048255 | 8,409904943 | 8,824319148 | 0,003478365 | 0,005897074 |
| F-box protein 34                                                                            | 0,833314023 | 7,946639017 | 8,822022504 | 0,003481849 | 0,005897276 |
| dystrobrevin binding protein 1                                                              | 0,866399732 | 12,20878315 | 8,816904587 | 0,003489626 | 0,005904743 |
| RIKEN cDNA 2400001E08 gene                                                                  | 1,010933251 | 8,521300011 | 8,812560525 | 0,003496242 | 0,005910234 |
| STT3, subunit of the oligosaccharyltransferase complex, homolog B (S. cerevisiae)           | 0,936435823 | 10,66666485 | 8,806901339 | 0,003504883 | 0,005919133 |
| Tp53rk binding protein                                                                      | 0,913865642 | 7,512829818 | 8,797179003 | 0,003519786 | 0,005938097 |
| dehydrogenase/reductase (SDR family) member 7                                               | 0,945728745 | 7,345674797 | 8,79516206  | 0,003522887 | 0,005938097 |
| UDP-N-acetyl-alpha-D-galactosamine:polypeptide N-acetylgalactosaminyltransferase 1          | 0,879156455 | 9,18922775  | 8,775272347 | 0,003553632 | 0,005984167 |
| 3-ketodihydrospingosine reductase                                                           | 0,725644859 | 7,769609018 | 8,748249644 | 0,003595898 | 0,006049529 |
| RIKEN cDNA 2210404J11 gene                                                                  | 0,980271603 | 7,037682918 | 8,744275616 | 0,003602163 | 0,006054258 |
| dehydrogenase/reductase (SDR family) X chromosome                                           | 0,936806417 | 7,066165857 | 8,725747381 | 0,003631534 | 0,006097777 |
| sorting nexin family member 27                                                              | 0,731045916 | 6,546512089 | 8,71918239  | 0,003794620 | 0,00610951  |
| patched domain containing 1                                                                 | 0,896978848 | 5,350857228 | 8,712232152 | 0,003653132 | 0,006122314 |
| hepatocyte growth factor activator                                                          | 0,6644047   | 5,350147846 | 8,698291727 | 0,003675564 | 0,006154025 |
| sphingosine-1-phosphate receptor 2                                                          | 0,848936613 | 6,040705662 | 8,68942917  | 0,003689908 | 0,006172145 |
| solute carrier family 25 (mitochondrial carrier, adenine nucleotide translocator), member 5 | 0,893397    | 12,86946921 | 8,678408508 | 0,003707833 | 0,006196217 |
| cytochrome b5 type B                                                                        | 0,848960509 | 9,979641618 | 8,661508192 | 0,003735516 | 0,006236533 |
| transmembrane protein 106A                                                                  | 0,877597303 | 7,228324734 | 8,654147351 | 0,003747648 | 0,006250834 |
| solute carrier family 35, member C2                                                         | 0,592768893 | 6,433004168 | 8,64158994  | 0,003768448 | 0,006279552 |
| histone cluster 1, H3d                                                                      | 0,704304189 | 6,726616596 | 8,625694101 | 0,003794968 | 0,006312788 |
| histone cluster 1, H2af                                                                     | 0,85266203  | 7,57394123  | 8,625319684 | 0,003795595 | 0,006312788 |
| solute carrier family 39 (zinc transporter), member 7                                       | 0,873604963 | 8,886660004 | 8,620519567 | 0,003803647 | 0,006320183 |
| conserved helix-loop-helix ubiquitous kinase                                                | 0,844704353 | 8,094109331 | 8,616319683 | 0,003810708 | 0,00632592  |
| tyrosine kinase 2                                                                           | 0,788408886 | 9,972252088 | 8,605396366 | 0,003829144 | 0,006349611 |
| FAD-dependent oxidoreductase domain containing 2                                            | 0,806236622 | 5,579349962 | 8,603577389 | 0,003832224 | 0,006349611 |
| cDNA sequence BC057079                                                                      | 0,799884814 | 6,144452058 | 8,58297753  | 0,003867302 | 0,006401681 |
| PQ loop repeat containing                                                                   | 0,965210934 | 9,270263652 | 8,578943459 | 0,003874214 | 0,006407073 |
| SEC63-like (S. cerevisiae)                                                                  | 0,860543563 | 8,73587458  | 8,57334204  | 0,003883849 | 0,006416954 |
| Josephin domain containing 2                                                                | 0,888548555 | 8,937655935 | 8,561914425 | 0,00390355  | 0,006443431 |
| complement component 1, q subcomponent binding protein                                      | 0,823782397 | 8,379777852 | 8,559053432 | 0,003908504 | 0,006445538 |
| protein phosphatase 2, regulatory subunit B (B56), alpha isoform                            | 0,996055132 | 9,03334915  | 8,549188102 | 0,00392564  | 0,006467714 |
| secretory carrier membrane protein 4                                                        | 0,805777769 | 7,933582302 | 8,541757485 | 0,003938604 | 0,00648298  |
| cDNA sequence BC029214                                                                      | 1,084227136 | 5,649970854 | 8,53650612  | 0,003947796 | 0,006492014 |
| nucleolar protein 12                                                                        | 0,981687119 | 7,740499402 | 8,531216169 | 0,00395708  | 0,006501182 |
| transmembrane protein 63a                                                                   | 0,795426218 | 6,486018078 | 8,513542457 | 0,00398828  | 0,006546306 |
| N-acetylglucosamine kinase                                                                  | 0,813460352 | 9,999578718 | 8,495740541 | 0,004019992 | 0,006592185 |
| hyaluronoglucosaminidase 2                                                                  | 0,822282252 | 9,465091824 | 8,492867248 | 0,004025137 | 0,006594454 |
| syntrophin, acidic 1                                                                        | 0,778531082 | 5,107609808 | 8,489089931 | 0,004031913 | 0,006599387 |
| RIKEN cDNA 9430038I01 gene                                                                  | 0,869856918 | 5,873498147 | 8,482554434 | 0,004043668 | 0,006612453 |
| neuropilin (NRP) and tollid (TLL)-like 2                                                    | 0,942529898 | 4,911446596 | 8,448480523 | 0,004105592 | 0,00670405  |
| keratinocyte associated protein 3                                                           | 0,933780454 | 7,877123376 | 8,447532618 | 0,00410733  | 0,00670405  |
| cyclin-dependent kinase 13                                                                  | 0,857495639 | 7,328885298 | 8,419901452 | 0,00415837  | 0,006781044 |
| vomer nasal 1 receptor 58                                                                   | 0,694489124 | 8,040699532 | 8,411026019 | 0,004174918 | 0,006801702 |
| cornichon homolog 4 (Drosophila)                                                            | 0,798849174 | 10,41726989 | 8,407155902 | 0,004182158 | 0,00680717  |
| transmembrane protein 111                                                                   | 0,819166705 | 8,553270791 | 8,396413664 | 0,004202328 | 0,006833656 |
| sodium channel, type IV, beta                                                               | 0,778054831 | 4,584376182 | 8,385403707 | 0,004223117 | 0,006861097 |
| general transcription factor II A, 1                                                        | 0,797069452 | 5,670203883 | 8,381017173 | 0,004231432 | 0,006868242 |
| DEAH (Asp-Glu-Ala-His) box polypeptide 35                                                   | 0,701912256 | 5,116535137 | 8,372380503 | 0,00424786  | 0,006888527 |
| Fas-associated factor 1                                                                     | 0,971705948 | 11,45702178 | 8,363762728 | 0,004264324 | 0,006906693 |
| tumor necrosis factor receptor superfamily, member 1a                                       | 0,895253225 | 5,665638313 | 8,362396085 | 0,004266942 | 0,006906693 |
| transmembrane protein 66                                                                    | 0,826192648 | 10,71131305 | 8,338936659 | 0,004312165 | 0,006973454 |
| NIPA-like domain containing 3                                                               | 0,812375539 | 5,624726297 | 8,327992876 | 0,004333449 | 0,007001416 |
| chromodomain helicase DNA binding protein 3                                                 | 0,663152333 | 5,615725291 | 8,317715459 | 0,004353547 | 0,007027411 |
| Smith-Magenis syndrome chromosome region, candidate 7 homolog (human)                       | 0,808107101 | 5,594544181 | 8,30785366  | 0,004372933 | 0,007045893 |
| casein kinase 1, gamma 2                                                                    | 0,7854313   | 10,80363552 | 8,307102921 | 0,004374413 | 0,007045893 |
| acetoacetyl-CoA synthetase                                                                  | 0,855736446 | 8,230940263 | 8,305763047 | 0,004377055 | 0,007045893 |
| eyes absent 3 homolog (Drosophila)                                                          | 0,782797876 | 5,001324067 | 8,291733874 | 0,004404834 | 0,007084105 |
| proline-rich nuclear receptor coactivator 2                                                 | 0,916560209 | 10,03631262 | 8,261733373 | 0,004464918 | 0,007173576 |
| microtubule-actin crosslinking factor 1                                                     | 1,068490637 | 5,866567649 | 8,259884801 | 0,004468651 | 0,007173576 |

|                                                                                                |             |             |             |             |             |
|------------------------------------------------------------------------------------------------|-------------|-------------|-------------|-------------|-------------|
| perlecan (heparan sulfate proteoglycan 2)                                                      | 0,67471949  | 4,997194996 | 8,230504823 | 0,004528463 | 0,007262941 |
| small G protein signaling modulator 3                                                          | 0,805983372 | 5,3567386   | 8,225160007 | 0,004539442 | 0,007273895 |
| RIKEN cDNA 1810009N02 gene                                                                     | 0,910283466 | 5,979645622 | 8,202604974 | 0,004586112 | 0,007341967 |
| zinc finger protein 148                                                                        | 0,727089242 | 5,728960843 | 8,199825348 | 0,004591901 | 0,007344528 |
| asparagine-linked glycosylation 2 homolog (yeast, alpha-1,3-mannosyltransferase)               | 0,809772463 | 8,191006916 | 8,188548478 | 0,004615475 | 0,007375504 |
| mitochondrial ribosomal protein L37                                                            | 0,858425796 | 8,642045126 | 8,182536716 | 0,004628099 | 0,007380317 |
| tubulin cofactor A                                                                             | 0,939432078 | 12,59163564 | 8,182471775 | 0,004628236 | 0,007380317 |
| sperm associated antigen 9                                                                     | 0,93269914  | 9,041906371 | 8,1811024   | 0,004631117 | 0,007380317 |
| zinc finger protein 664                                                                        | 0,790702452 | 7,121975377 | 8,175561777 | 0,004642796 | 0,007392208 |
| WW domain binding protein 7                                                                    | 0,760041229 | 7,503123074 | 8,157198746 | 0,004681744 | 0,007447456 |
| CD63 antigen                                                                                   | 0,720870495 | 11,11560357 | 8,154718136 | 0,004687034 | 0,007449112 |
| profilin 2                                                                                     | 0,76722064  | 6,607193009 | 8,136052888 | 0,004727059 | 0,007499866 |
| RNA binding motif protein 47                                                                   | 0,77351856  | 9,798782899 | 8,133963529 | 0,004731563 | 0,007499866 |
| syntaxin binding protein 2                                                                     | 0,864238822 | 11,43230353 | 8,133852193 | 0,004731804 | 0,007499866 |
| CDC14 cell division cycle 14 homolog A (S. cerevisiae)                                         | 1,047665    | 6,501931374 | 8,118625487 | 0,004764784 | 0,007545317 |
| 2-oxoglutarate and iron-dependent oxygenase domain containing 2                                | 0,660857013 | 5,186523613 | 8,100306213 | 0,004804812 | 0,007594591 |
| calpain 7                                                                                      | 0,904049275 | 8,6051197   | 8,100285373 | 0,004804858 | 0,007594591 |
| zinc finger protein 472                                                                        | 0,781882244 | 6,913540877 | 8,098446699 | 0,004808897 | 0,007594591 |
| expressed sequence AI480653                                                                    | 0,637812256 | 5,396242917 | 8,091591455 | 0,004823989 | 0,007606737 |
| RIKEN cDNA 2310047M10 gene                                                                     | 0,779381119 | 9,009503435 | 8,088995641 | 0,004829718 | 0,007606737 |
| transmembrane protein 14C                                                                      | 0,945076285 | 11,66707971 | 8,086279637 | 0,004835721 | 0,007606737 |
| transmembrane protein 134                                                                      | 1,005245277 | 8,147421682 | 8,0851439   | 0,004838234 | 0,007606737 |
| CCAAT/enhancer binding protein (C/EBP), epsilon                                                | 0,656440463 | 5,492195715 | 8,08512117  | 0,004838284 | 0,007606737 |
| actinin alpha 4                                                                                | 0,695251084 | 7,768745785 | 8,082295307 | 0,004844454 | 0,007609752 |
| OMA1 homolog, zinc metalloproteinase (S. cerevisiae)                                           | 1,046952671 | 8,579433809 | 8,073170496 | 0,004864815 | 0,007634755 |
| BCL2 binding component 3                                                                       | 0,777512013 | 9,176904449 | 8,057823504 | 0,004899131 | 0,007670839 |
| aurora kinase A                                                                                | 1,047104831 | 5,688187107 | 8,056210233 | 0,004902754 | 0,007670839 |
| cyclin-dependent kinase 2                                                                      | 0,920514456 | 6,664614382 | 8,055601817 | 0,004904122 | 0,007670839 |
| ribosome binding factor A                                                                      | 0,81319261  | 9,301600042 | 8,055072764 | 0,004905311 | 0,007670839 |
| DEAH (Asp-Glu-Ala-His) box polypeptide 37                                                      | 0,641821481 | 5,639402187 | 8,018028603 | 0,004989413 | 0,007795402 |
| insulin-like 6                                                                                 | 0,991414099 | 12,43109353 | 8,014566911 | 0,004997356 | 0,00780086  |
| transmembrane protein 120A                                                                     | 0,829771353 | 9,041519409 | 8,006943501 | 0,0050149   | 0,007821282 |
| lipin 1                                                                                        | 0,839998615 | 6,967870919 | 8,004007025 | 0,005021677 | 0,007824889 |
| diacylglycerol kinase zeta                                                                     | 0,760197604 | 6,587370779 | 8,00054728  | 0,005029675 | 0,007830391 |
| RIKEN cDNA 2400001E08 gene                                                                     | 0,916333069 | 9,679431173 | 7,997539778 | 0,005036639 | 0,007834275 |
| stromal cell derived factor 4                                                                  | 0,713486501 | 6,089466222 | 7,990918744 | 0,00505201  | 0,007851217 |
| hydroxyacylglutathione hydrolase-like                                                          | 0,902488675 | 7,972723972 | 7,987031531 | 0,005061059 | 0,007858313 |
| transmembrane protein 55A                                                                      | 0,945362301 | 8,455226692 | 7,981979963 | 0,005072846 | 0,007869645 |
| a disintegrin-like and metalloproteinase (reprolysin type) with thrombospondin type 1 motif, 2 | 0,587730673 | 5,524959753 | 7,961462869 | 0,005121046 | 0,007937395 |
| peroxisomal biogenesis factor 16                                                               | 1,040314471 | 7,209916566 | 7,944868716 | 0,005160414 | 0,007978473 |
| predicted gene 10304                                                                           | 0,758180352 | 4,620392606 | 7,94188068  | 0,00516754  | 0,007978473 |
| RIKEN cDNA 2610039C10 gene                                                                     | 0,795034184 | 9,511597587 | 7,940983887 | 0,005169681 | 0,007978473 |
| TMEM9 domain family, member B                                                                  | 0,909709675 | 8,883927991 | 7,939846673 | 0,005172397 | 0,007978473 |
| mitogen-activated protein kinase 1 interacting protein 1                                       | 0,830843501 | 7,013804897 | 7,939778133 | 0,005172561 | 0,007978473 |
| motile sperm domain containing 1                                                               | 0,758141001 | 8,561345875 | 7,938367202 | 0,005175933 | 0,007978473 |
| phosphotriesterase related                                                                     | 0,851695415 | 6,063794311 | 7,936914563 | 0,005179408 | 0,007978473 |
| potassium channel tetramerisation domain containing 5                                          | 0,760301886 | 7,766898732 | 7,929601106 | 0,005196942 | 0,007998455 |
| epithelial stromal interaction 1 (breast)                                                      | 1,021474251 | 7,392495399 | 7,924877124 | 0,005208305 | 0,008008911 |
| solute carrier family 25 (mitochondrial carrier, adenine nucleotide translocator), member 5    | 0,894719912 | 10,47213788 | 7,889931087 | 0,005293248 | 0,008131741 |
| L antigen family, member 3                                                                     | 0,811993913 | 7,814729738 | 7,88821472  | 0,005297461 | 0,008131741 |
| guanine nucleotide binding protein-like 3 (nucleolar)                                          | 0,878870848 | 10,43527777 | 7,880936544 | 0,005315367 | 0,008147984 |
| cathepsin E                                                                                    | 0,777302251 | 4,599496551 | 7,880137188 | 0,005317338 | 0,008147984 |
| zinc finger protein 467                                                                        | 0,941585711 | 6,515558929 | 7,874825781 | 0,005330455 | 0,00816095  |
| DNA cross-link repair 1B, PSO2 homolog (S. cerevisiae)                                         | 0,995508016 | 6,518208547 | 7,867494021 | 0,005348623 | 0,00818162  |
| selenoprotein                                                                                  | 0,906639361 | 9,660918574 | 7,862136482 | 0,005361944 | 0,008194845 |
| Fanconi anemia, complementation group E                                                        | 0,775846428 | 6,250180228 | 7,853646306 | 0,005383131 | 0,008220059 |
| protein disulfide isomerase associated 3                                                       | 0,915730039 | 11,29542462 | 7,84112048  | 0,005414565 | 0,008260863 |
| ras responsive element binding protein 1                                                       | 0,722991348 | 6,919953241 | 7,837267337 | 0,005424276 | 0,008260957 |
| RIKEN cDNA C430049B03 gene                                                                     | 1,083875539 | 4,924902592 | 7,834563995 | 0,005431102 | 0,008260957 |
| myotubularin related protein 10                                                                | 0,746827187 | 5,327524982 | 7,834322939 | 0,005431711 | 0,008260957 |
| pleckstrin homology domain containing, family M (with RUN domain) member 2                     | 0,797915808 | 11,54067605 | 7,833624673 | 0,005433476 | 0,008260957 |
| 1-acylglycerol-3-phosphate O-acyltransferase 2 (lysophosphatidic acid acyltransferase, beta)   | 0,936864734 | 6,64382646  | 7,827947057 | 0,005447851 | 0,008275635 |
| zinc finger protein 771                                                                        | 0,759566612 | 4,915422036 | 7,823206405 | 0,005459887 | 0,008286737 |
| kinesin family member 3A                                                                       | 0,822657434 | 5,923028164 | 7,811231673 | 0,005490425 | 0,008318734 |
| poly(A) binding protein interacting protein 2B                                                 | 0,81605313  | 8,31389176  | 7,809605499 | 0,005494587 | 0,008318734 |
| migration and invasion inhibitory protein                                                      | 0,8035408   | 6,008922988 | 7,809364371 | 0,005495205 | 0,008318734 |
| zinc finger protein 532                                                                        | 0,841356256 | 5,480195163 | 7,801840864 | 0,005514511 | 0,008340757 |
| RIKEN cDNA 2310061J03 gene                                                                     | 0,883671746 | 6,782101625 | 7,798471369 | 0,005523183 | 0,008346672 |
| transmembrane protein 132A                                                                     | 0,664168356 | 4,826965377 | 7,794616108 | 0,005533124 | 0,008354493 |
| RIKEN cDNA 5930416119 gene                                                                     | 0,891901983 | 8,685659179 | 7,791084822 | 0,005542248 | 0,0083592   |
| membrane-associated ring finger (C3HC4) 2                                                      | 0,763824383 | 8,27797903  | 7,789720102 | 0,005545778 | 0,0083592   |
| ATPase, H+ transporting, lysosomal V0 subunit B                                                | 1,048460282 | 10,91366752 | 7,78057935  | 0,005569492 | 0,008387732 |
| GLI pathogenesis-related 2                                                                     | 0,931002824 | 12,51770496 | 7,773787748 | 0,005587187 | 0,008407158 |
| predicted gene 10355                                                                           | 0,891259117 | 6,437488042 | 7,769556556 | 0,005598244 | 0,008416571 |
| interleukin 6 signal transducer                                                                | 0,6623675   | 5,730700893 | 7,767166051 | 0,005604502 | 0,008418759 |
| RIKEN cDNA 2010107E04 gene                                                                     | 0,85418396  | 12,43028223 | 7,765219426 | 0,005609604 | 0,008419208 |
| presenilin associated, rhomboid-like                                                           | 0,974657055 | 10,86153299 | 7,758832671 | 0,00562638  | 0,008433115 |
| general transcription factor II E, polypeptide 1 (alpha subunit)                               | 1,069410111 | 8,602478136 | 7,758030524 | 0,005628491 | 0,008433115 |
| protein inhibitor of activated STAT 3                                                          | 0,781831933 | 6,780139243 | 7,728678054 | 0,005706367 | 0,008542495 |
| arachidonate 5-lipoxygenase                                                                    | 1,045355154 | 4,984578209 | 7,714536557 | 0,005744327 | 0,008588338 |
| galactosylceramidase                                                                           | 0,847245729 | 6,625137008 | 7,71353738  | 0,00574702  | 0,008588338 |

|                                                                                                |             |             |             |             |             |
|------------------------------------------------------------------------------------------------|-------------|-------------|-------------|-------------|-------------|
| family with sequence similarity 165, member B                                                  | 1,065559118 | 9,12453189  | 7,711806972 | 0,005751688 | 0,008588338 |
| euchromatic histone lysine N-methyltransferase 2                                               | 0,722160532 | 8,247219593 | 7,70882675  | 0,005759736 | 0,008591054 |
| mannose phosphate isomerase                                                                    | 0,882154474 | 8,84087166  | 7,707505519 | 0,005763309 | 0,008591054 |
| kinesin family member 18A                                                                      | 0,911506989 | 5,201629209 | 7,705567223 | 0,005768554 | 0,008591568 |
| plectin                                                                                        | 0,928786954 | 10,68947759 | 7,695745533 | 0,005795217 | 0,008623952 |
| hook homolog 3 (Drosophila)                                                                    | 0,880754354 | 7,698314203 | 7,691443088 | 0,005806942 | 0,0086307   |
| solute carrier family 4 (anion exchanger), member 3                                            | 0,838634371 | 5,035447938 | 7,690469516 | 0,005809598 | 0,0086307   |
| KCNQ1 overlapping transcript 1                                                                 | 0,784307855 | 5,428363017 | 7,685720464 | 0,005822578 | 0,008642659 |
| motile sperm domain containing 1                                                               | 0,755928654 | 5,947673318 | 7,660290091 | 0,005892652 | 0,008739272 |
| glutamic pyruvate transaminase (alanine aminotransferase) 2                                    | 0,758854191 | 5,569884906 | 7,646696612 | 0,005930505 | 0,008787976 |
| transcription elongation factor A (SII)-like 8                                                 | 0,912558979 | 8,639331559 | 7,621982775 | 0,006000042 | 0,008876018 |
| eukaryotic translation elongation factor 1 gamma                                               | 0,917593182 | 12,01621596 | 7,62198114  | 0,006000047 | 0,008876018 |
| DBF4 homolog (S. cerevisiae)                                                                   | 0,776061004 | 6,851261871 | 7,616166301 | 0,006016543 | 0,008892917 |
| protein kinase C, delta                                                                        | 0,829292889 | 10,97447345 | 7,600141368 | 0,006062275 | 0,008949439 |
| nuclear receptor subfamily 2, group F, member 6                                                | 0,751983071 | 8,305377283 | 7,599193267 | 0,006064994 | 0,008949439 |
| CKLF-like MARVEL transmembrane domain containing 7                                             | 1,060136063 | 9,313955233 | 7,594356256 | 0,006078883 | 0,008954587 |
| Dnaj (Hsp40) homolog, subfamily C, member 19                                                   | 0,852362077 | 5,66931712  | 7,59274165  | 0,006083527 | 0,008954587 |
| family with sequence similarity 113, member A                                                  | 0,955767789 | 7,772299841 | 7,59264459  | 0,006083807 | 0,008954587 |
| thioredoxin 2                                                                                  | 0,893925352 | 6,756758432 | 7,588001622 | 0,006097186 | 0,00896675  |
| aurora kinase B                                                                                | 0,805666605 | 5,095711698 | 7,581496554 | 0,006115987 | 0,008979496 |
| suppressor of Ty 5 homolog (S. cerevisiae)                                                     | 0,762879221 | 8,416808765 | 7,580214338 | 0,006119701 | 0,008979496 |
| cysteine sulfonic acid decarboxylase                                                           | 0,68763218  | 4,875562675 | 7,57521832  | 0,006123749 | 0,008979496 |
| nucleus accumbens associated 2, BEN and BTB (POZ) domain containing                            | 0,841869031 | 8,631251411 | 7,577923611 | 0,006126342 | 0,008979496 |
| adrenocortical dysplasia                                                                       | 0,880687194 | 10,20306711 | 7,569376949 | 0,006151194 | 0,00900839  |
| LIM and SH3 protein 1                                                                          | 0,800494992 | 5,287558975 | 7,564383178 | 0,006165768 | 0,00901338  |
| transforming growth factor, beta receptor associated protein 1                                 | 0,83240963  | 9,160671662 | 7,563019097 | 0,006169755 | 0,00901338  |
| cleavage and polyadenylation specific factor 1                                                 | 0,768395616 | 6,468659995 | 7,562926461 | 0,006170026 | 0,00901338  |
| microtubule associated monooxygenase, calponin and LIM domain containing 3                     | 0,948653758 | 4,882481763 | 7,555548857 | 0,006191647 | 0,009037433 |
| RIKEN cDNA 4930506M07 gene                                                                     | 0,794622388 | 8,031444225 | 7,535179704 | 0,006251794 | 0,009117632 |
| BRO1 domain and CAAX motif containing                                                          | 0,806905478 | 9,597120339 | 7,5329862   | 0,006258311 | 0,00911955  |
| mitogen-activated protein kinase kinase 5                                                      | 0,726239901 | 6,827054379 | 7,512188626 | 0,006320489 | 0,009202505 |
| Bardet-Biedl syndrome 7 (human)                                                                | 0,735290404 | 6,11633369  | 7,499539498 | 0,006358652 | 0,009250387 |
| predicted gene 10145                                                                           | 0,796652897 | 12,00899015 | 7,493367102 | 0,00637737  | 0,009269925 |
| RAB1, member RAS oncogene family                                                               | 0,816618082 | 8,315971942 | 7,4809831   | 0,006415117 | 0,009317067 |
| RIKEN cDNA 1810074P20 gene                                                                     | 0,987790056 | 7,457962577 | 7,475111601 | 0,006433103 | 0,009335454 |
| armadillo repeat containing, X-linked 3                                                        | 0,729743969 | 5,304218862 | 7,462721804 | 0,006471246 | 0,009371658 |
| isocitrate dehydrogenase 3 (NAD+), gamma                                                       | 0,941460734 | 11,16439249 | 7,462271873 | 0,006472636 | 0,009371658 |
| serum/glucocorticoid regulated kinase 3                                                        | 0,965422186 | 4,83628801  | 7,461801533 | 0,006474089 | 0,009371658 |
| isocitrate dehydrogenase 3 (NAD+) beta                                                         | 0,823191582 | 10,52198397 | 7,457829926 | 0,006486377 | 0,009381699 |
| protein arginine N-methyltransferase 7                                                         | 0,824121578 | 5,339464589 | 7,446230799 | 0,006522418 | 0,009419751 |
| myotubularin related protein 3                                                                 | 0,736029276 | 5,709191198 | 7,444515834 | 0,006527766 | 0,009419751 |
| vacuolar protein sorting 8 homolog (S. cerevisiae)                                             | 0,952940985 | 6,260291491 | 7,442511357 | 0,006534023 | 0,009419751 |
| ribonuclease H2, subunit C                                                                     | 0,906791889 | 6,940496536 | 7,442461293 | 0,00653418  | 0,009419751 |
| euchromatic histone lysine N-methyltransferase 2                                               | 0,7656037   | 7,842964201 | 7,437412367 | 0,006549972 | 0,009434758 |
| asparagine-linked glycosylation 5 homolog (yeast, dolichyl-phosphate beta-glucosyltransferase) | 0,925517681 | 8,461414583 | 7,429682703 | 0,006574234 | 0,009461931 |
| vesicle-associated membrane protein, associated protein B and C                                | 0,785262504 | 8,91253985  | 7,427295602 | 0,006581748 | 0,009462604 |
| DDB1 and CUL4 associated factor 6                                                              | 1,039132159 | 5,784798074 | 7,426105501 | 0,006585497 | 0,009462604 |
| NHP2 ribonucleoprotein homolog (yeast)                                                         | 0,940324799 | 9,901381823 | 7,412991701 | 0,006626976 | 0,009514406 |
| septin 9                                                                                       | 0,746896379 | 6,707619855 | 7,410522716 | 0,006634819 | 0,009517871 |
| pyruvate dehydrogenase E1 alpha 1                                                              | 0,931100522 | 8,737715797 | 7,391714951 | 0,006694915 | 0,009596227 |
| ring finger protein 103                                                                        | 0,818500481 | 9,373500949 | 7,376782374 | 0,006743072 | 0,009657358 |
| SET domain containing 1B                                                                       | 0,744094014 | 8,795062682 | 7,374785295 | 0,006749543 | 0,009658734 |
| syntaxin 7                                                                                     | 0,835384948 | 10,50154284 | 7,361966289 | 0,006791247 | 0,009710487 |
| eukaryotic translation initiation factor 3, subunit G                                          | 0,808618649 | 11,94453357 | 7,357711022 | 0,006805156 | 0,009722444 |
| succinate-CoA ligase, GDP-forming, alpha subunit                                               | 0,987038317 | 9,884696482 | 7,347126478 | 0,006839896 | 0,0097502   |
| MAP kinase-interacting serine/threonine kinase 1                                               | 0,751396164 | 8,601464006 | 7,34707944  | 0,00684005  | 0,0097502   |
| SRY-box containing gene 9                                                                      | 0,756925449 | 4,699689831 | 7,34670909  | 0,00684127  | 0,0097502   |
| predicted gene, 19732                                                                          | 0,902680122 | 6,450091723 | 7,33513662  | 0,006879493 | 0,009796711 |
| vesicle amine transport protein 1 homolog-like (T. californica)                                | 0,847923397 | 4,95557454  | 7,330482138 | 0,006894936 | 0,009810732 |
| myelin basic protein                                                                           | 0,852888699 | 9,244170958 | 7,304514376 | 0,006981824 | 0,00992409  |
| high mobility group box transcription factor 1                                                 | 0,903563505 | 11,41849405 | 7,303297845 | 0,006985925 | 0,00992409  |
| aprataxin and PNKP like factor                                                                 | 0,7235644   | 6,300684912 | 7,286621298 | 0,007042426 | 0,009996253 |
| peptidyl arginine deiminase, type II                                                           | 0,76005755  | 4,562617094 | 7,281108573 | 0,007061218 | 0,010014818 |
| vitamin K epoxide reductase complex, subunit 1                                                 | 0,790486268 | 8,461867878 | 7,276056572 | 0,00707849  | 0,010031199 |
| hypoxanthine guanine phosphoribosyl transferase                                                | 1,055934342 | 10,88498623 | 7,269733941 | 0,007100174 | 0,01005262  |
| CDK5 and Abl enzyme substrate 2                                                                | 0,863197685 | 6,744809406 | 7,268308106 | 0,007105075 | 0,01005262  |
| zinc metalloproteinase, STE24 homolog (S. cerevisiae)                                          | 0,913031162 | 8,476909877 | 7,254018092 | 0,007154406 | 0,010114252 |
| endonuclease domain containing 1                                                               | 0,828100182 | 8,662310476 | 7,252156795 | 0,00716086  | 0,010115219 |
| peptidyl-tRNA hydrolase 1 homolog (S. cerevisiae)                                              | 0,649041148 | 5,785963247 | 7,248072792 | 0,007175045 | 0,010127096 |
| zinc finger, DHH domain containing 13                                                          | 0,854928988 | 8,261725525 | 7,243758694 | 0,007190064 | 0,010140131 |
| RIKEN cDNA 1700021C14 gene                                                                     | 0,794138375 | 6,271341416 | 7,233749529 | 0,00722505  | 0,01018128  |
| membrane magnesium transporter 1                                                               | 1,064871777 | 6,451415996 | 7,220632785 | 0,007271193 | 0,010238073 |
| leucine-rich PPR-motif containing                                                              | 0,805575752 | 5,859430715 | 7,211138701 | 0,007304803 | 0,010272946 |
| UDP-GlcNAc:betaGal beta-1,3-N-acetylglucosaminyltransferase 8                                  | 0,762697575 | 4,885163762 | 7,210328303 | 0,00730768  | 0,010272946 |
| ATM interactor                                                                                 | 0,970856676 | 10,70652246 | 7,207795952 | 0,007316679 | 0,010274001 |
| abl-interactor 2                                                                               | 0,949766257 | 8,336936293 | 7,206819529 | 0,007320152 | 0,010274001 |
| RIKEN cDNA 4933433P14 gene                                                                     | 0,749878467 | 4,836324441 | 7,194445938 | 0,00736433  | 0,010327737 |
| phosphorylase kinase alpha 2                                                                   | 0,725964248 | 6,675903219 | 7,185234309 | 0,007397417 | 0,010365845 |
| pleckstrin homology domain containing, family F (with FYVE domain) member 2                    | 0,789543277 | 9,569201431 | 7,174059024 | 0,007437787 | 0,01041409  |
| expressed sequence C87436                                                                      | 0,823269815 | 5,384714386 | 7,170956801 | 0,007449038 | 0,010421519 |
| mitochondrial ribosomal protein L3                                                             | 0,863115118 | 8,908902102 | 7,167418463 | 0,007461895 | 0,010431181 |

|                                                                                        |             |             |             |             |             |
|----------------------------------------------------------------------------------------|-------------|-------------|-------------|-------------|-------------|
| chimerin (chimaerin) 2                                                                 | 0,911135709 | 5,132156789 | 7,160112144 | 0,007488523 | 0,010460065 |
| coronin, actin binding protein 1C                                                      | 0,727273003 | 10,48817501 | 7,157108138 | 0,007499503 | 0,010467061 |
| zinc finger protein 873                                                                | 0,663773431 | 5,51459039  | 7,149143652 | 0,007528704 | 0,010499457 |
| V-set and immunoglobulin domain containing 10                                          | 0,932508352 | 7,749652795 | 7,142719956 | 0,00755235  | 0,010524062 |
| ADP-ribosylation factor GTPase activating protein 1                                    | 0,861018553 | 7,262846052 | 7,135341003 | 0,007579618 | 0,01055367  |
| eukaryotic translation elongation factor 1 delta (guanine nucleotide exchange protein) | 0,81728927  | 11,24524949 | 7,127382583 | 0,007609154 | 0,010586387 |
| UPF3 regulator of nonsense transcripts homolog A (yeast)                               | 0,875672761 | 6,358453034 | 7,117265838 | 0,007646891 | 0,010630452 |
| dual specificity phosphatase 23                                                        | 0,798850933 | 6,818159228 | 7,114418617 | 0,00765755  | 0,010634639 |
| predicted gene, 20340                                                                  | 0,650309532 | 6,931316995 | 7,113221833 | 0,007662036 | 0,010634639 |
| DEAD (Asp-Glu-Ala-Asp) box polypeptide 39B                                             | 0,843359386 | 9,991110609 | 7,104593224 | 0,007694465 | 0,0106712   |
| calcium/calmodulin-dependent protein kinase II inhibitor 2                             | 0,867360562 | 5,895388004 | 7,102212968 | 0,007703438 | 0,010673707 |
| serine/threonine kinase 11 interacting protein                                         | 1,028104726 | 5,453056676 | 7,100884981 | 0,00770845  | 0,010673707 |
| protein tyrosine phosphatase, non-receptor type 21                                     | 0,7549079   | 5,260803682 | 7,09493997  | 0,007730932 | 0,010693847 |
| thioredoxin reductase 2                                                                | 0,866031115 | 7,154751802 | 7,093814725 | 0,007735195 | 0,010693847 |
| polyamine oxidase (exo-N4-amino)                                                       | 0,769957683 | 5,494220616 | 7,091297919 | 0,007744742 | 0,010698607 |
| family with sequence similarity 32, member A                                           | 0,888209597 | 5,126057795 | 7,088578593 | 0,007755071 | 0,010704441 |
| ring finger protein 26                                                                 | 0,772038864 | 7,684769626 | 7,081637317 | 0,00778151  | 0,010732484 |
| centrosomal protein 63                                                                 | 0,892850764 | 9,651860501 | 7,075392495 | 0,007806752 | 0,010758833 |
| ADP-dependent glucokinase                                                              | 0,935338179 | 6,684213853 | 7,063846608 | 0,007849746 | 0,010809588 |
| phosphoribosyl pyrophosphate synthetase-associated protein 1                           | 0,801482495 | 6,082825012 | 7,061672184 | 0,007858133 | 0,010812644 |
| discs, large homolog 5 (Drosophila)                                                    | 0,826194354 | 5,025469102 | 7,059920465 | 0,007864898 | 0,010813463 |
| reversion-inducing-cysteine-rich protein with kazal motifs                             | 0,763415456 | 4,937372654 | 7,041972495 | 0,007934587 | 0,010892225 |
| cytochrome c oxidase, subunit Vlb polypeptide 1                                        | 0,816075314 | 12,75465133 | 7,040626023 | 0,007939844 | 0,010892225 |
| calcium channel, voltage-dependent, beta 3 subunit                                     | 0,768124017 | 4,979243388 | 7,040370627 | 0,007940842 | 0,010892225 |
| transketolase                                                                          | 0,96471329  | 11,14667458 | 7,035292903 | 0,007960704 | 0,010904246 |
| interferon induced transmembrane protein 6                                             | 0,632737521 | 4,934643347 | 7,034711993 | 0,007962745 | 0,010904246 |
| capicua homolog (Drosophila)                                                           | 0,753737129 | 5,721069466 | 7,033368176 | 0,007968248 | 0,010904246 |
| transmembrane protein 135                                                              | 0,741504858 | 5,634800511 | 7,029813713 | 0,007982201 | 0,010914819 |
| RIKEN cDNA D430042009 gene                                                             | 0,948739987 | 7,775041591 | 7,024677798 | 0,008002411 | 0,010933926 |
| receptor (TNFRSF)-interacting serine-threonine kinase 1                                | 0,875169204 | 8,611462295 | 7,005602494 | 0,008077991 | 0,011028596 |
| phosphatidylinositol 3-kinase, regulatory subunit, polypeptide 2 (p85 beta)            | 0,687046349 | 5,006509638 | 7,00010549  | 0,008099922 | 0,011049933 |
| eukaryotic translation initiation factor 1A                                            | 0,883999373 | 9,757436898 | 6,989636729 | 0,008141879 | 0,011098534 |
| RIKEN cDNA 4921517L17 gene                                                             | 0,624633281 | 5,112869385 | 6,983932008 | 0,008164848 | 0,011121195 |
| SEC63-like (S. cerevisiae)                                                             | 0,920377473 | 8,88788901  | 6,97832849  | 0,008185845 | 0,011141139 |
| histone cluster 1, H3a                                                                 | 0,805842577 | 5,50742079  | 6,973117031 | 0,008208595 | 0,011161837 |
| cell division cycle 37 homolog (S. cerevisiae)-like 1                                  | 0,889400821 | 6,84347901  | 6,971477435 | 0,008215251 | 0,011161837 |
| peroxisomal biogenesis factor 11 alpha                                                 | 0,868963932 | 5,003206353 | 6,970270226 | 0,008220155 | 0,011161837 |
| heat shock protein 2                                                                   | 0,942508223 | 7,383705704 | 6,952925392 | 0,008290993 | 0,011243474 |
| adenylate cyclase 6                                                                    | 0,78320239  | 10,64326798 | 6,951999965 | 0,008294792 | 0,011243474 |
| salvador homolog 1 (Drosophila)                                                        | 0,840134801 | 9,925586424 | 6,950849486 | 0,008299518 | 0,011243474 |
| Sec31 homolog A (S. cerevisiae)                                                        | 0,797010673 | 6,292561006 | 6,945579578 | 0,008321205 | 0,011264149 |
| midkine                                                                                | 0,896538141 | 5,892547401 | 6,943525667 | 0,008329675 | 0,011266914 |
| thioredoxin domain containing 9                                                        | 0,769499152 | 4,811137277 | 6,941257376 | 0,00833904  | 0,011270885 |
| RIKEN cDNA 9130011J15 gene                                                             | 1,008463654 | 8,208957205 | 6,928400953 | 0,008392351 | 0,0113342   |
| IKAROS family zinc finger 1                                                            | 0,97878375  | 7,895803918 | 6,926118956 | 0,008401855 | 0,011336133 |
| myosin IXa                                                                             | 0,827860344 | 5,866634893 | 6,924952838 | 0,008406716 | 0,011336133 |
| DDRGM domain containing 1                                                              | 0,944162534 | 10,99676873 | 6,919055238 | 0,00843135  | 0,011360613 |
| tubulin-specific chaperone d                                                           | 0,809601736 | 8,079567969 | 6,913478449 | 0,008454721 | 0,011383353 |
| chloride channel 7                                                                     | 0,814671278 | 9,023719398 | 6,889134628 | 0,008557611 | 0,01151304  |
| killer cell lectin-like receptor, subfamily A, member 3                                | 0,854603687 | 4,931555302 | 6,886896627 | 0,008567142 | 0,011517024 |
| vacuolar protein sorting 35                                                            | 0,972528561 | 11,92202862 | 6,881406261 | 0,008590575 | 0,011539676 |
| spermatid perinuclear RNA binding protein                                              | 0,878450732 | 5,522939784 | 6,87562868  | 0,008615313 | 0,011564046 |
| RIKEN cDNA 1110038B12 gene                                                             | 0,751725483 | 9,232783363 | 6,872047766 | 0,008630687 | 0,011575818 |
| T-cell, immune regulator 1, ATPase, H+ transporting, lysosomal V0 protein A3           | 0,747786456 | 6,901279154 | 6,862598951 | 0,008671404 | 0,011618948 |
| cleavage and polyadenylation specific factor 7                                         | 0,733518692 | 9,710867739 | 6,861512521 | 0,0086761   | 0,011618948 |
| abhydrolase domain containing 16A                                                      | 0,867236849 | 9,018346414 | 6,855506549 | 0,008702112 | 0,011633916 |
| death associated protein kinase 1                                                      | 0,859694796 | 6,452263903 | 6,855145748 | 0,008703677 | 0,011633916 |
| expressed sequence AW549877                                                            | 0,799700845 | 9,271302097 | 6,854337184 | 0,008707187 | 0,011633916 |
| cell division cycle associated 8                                                       | 0,64703323  | 5,236243367 | 6,85040705  | 0,008724268 | 0,011647861 |
| catechol-O-methyltransferase                                                           | 0,767083421 | 9,020771116 | 6,842094705 | 0,008760522 | 0,011681905 |
| mature T-cell proliferation 1                                                          | 0,870787923 | 5,008059009 | 6,840037692 | 0,00876952  | 0,011681905 |
| translational activator of mitochondrially encoded cytochrome c oxidase I              | 0,84423234  | 4,849335292 | 6,839983229 | 0,008769759 | 0,011681905 |
| ubiquitin 1                                                                            | 0,794071613 | 4,678339947 | 6,816102976 | 0,008775004 | 0,011804719 |
| arrestin, beta 2                                                                       | 0,986133146 | 10,18705356 | 6,816008047 | 0,008775425 | 0,011804719 |
| magnesium-dependent phosphatase 1                                                      | 1,024448267 | 6,865084996 | 6,808171168 | 0,008910281 | 0,011842094 |
| fascin homolog 2, actin-bundling protein, retinal (Strongylocentrotus purpuratus)      | 0,946602026 | 4,832015726 | 6,791687734 | 0,008984107 | 0,011931166 |
| zinc finger protein 746                                                                | 0,863227025 | 7,770516066 | 6,781078285 | 0,009031996 | 0,011985684 |
| RCE1 homolog, prenyl protein peptidase (S. cerevisiae)                                 | 0,765869654 | 7,76493845  | 6,776416981 | 0,009053128 | 0,012004664 |
| mbt domain containing 1                                                                | 0,882863422 | 7,890417292 | 6,773088684 | 0,009068252 | 0,012008655 |
| serine/threonine kinase 19                                                             | 0,797841092 | 7,566338706 | 6,772735898 | 0,009069857 | 0,012008655 |
| small nucleolar RNA host gene 5                                                        | 1,013618812 | 7,584339294 | 6,769399112 | 0,009085052 | 0,012014441 |
| replication factor C (activator 1) 2                                                   | 0,811991349 | 10,11294407 | 6,768766732 | 0,009087934 | 0,012014441 |
| family with sequence similarity 13, member B                                           | 0,728821984 | 8,420022782 | 6,762109373 | 0,009118348 | 0,012045565 |
| solute carrier family 2 (facilitated glucose transporter), member 9                    | 0,785795458 | 4,625585999 | 6,759478989 | 0,009130397 | 0,0120524   |
| cyclin-dependent kinase 2                                                              | 0,948123737 | 9,56604938  | 6,736704347 | 0,009235488 | 0,012181949 |
| THUMP domain containing 2                                                              | 0,772806019 | 5,048265003 | 6,734099612 | 0,009247595 | 0,012188748 |
| RIKEN cDNA 2010204K13 gene                                                             | 0,750645663 | 4,45468782  | 6,728330238 | 0,009274477 | 0,012213412 |
| DEAH (Asp-Glu-Ala-His) box polypeptide 38                                              | 0,739608667 | 9,453631052 | 6,727095529 | 0,009280242 | 0,012213412 |
| microtubule associated serine/threonine kinase 3                                       | 0,874400637 | 9,224870459 | 6,721330349 | 0,009307213 | 0,012239719 |
| family with sequence similarity 125, member B                                          | 0,71628378  | 5,368945175 | 6,699942819 | 0,009408059 | 0,012363064 |
| ADP-ribosylation factor guanine nucleotide-exchange factor 2 (brefeldin A-inhibited)   | 0,813540153 | 6,429235886 | 6,694189851 | 0,009435399 | 0,012382326 |



|                                                                                |             |             |             |             |             |
|--------------------------------------------------------------------------------|-------------|-------------|-------------|-------------|-------------|
| SH3-domain binding protein 1                                                   | 0,82134105  | 4,846670774 | 6,693886234 | 0,009436844 | 0,012382326 |
| olfactory receptor 802                                                         | 0,677661397 | 5,380701965 | 6,686601784 | 0,009471599 | 0,012411365 |
| predicted gene 10785                                                           | 0,789001221 | 6,682963448 | 6,686280413 | 0,009473136 | 0,012411365 |
| transmembrane and coiled-coil domains 1                                        | 0,833884988 | 8,375239468 | 6,681600209 | 0,009495547 | 0,012431437 |
| PC4 and SFRS1 interacting protein 1                                            | 0,929008968 | 9,358191833 | 6,671708196 | 0,009543115 | 0,012484389 |
| protein regulator of cytokinesis 1                                             | 0,734413778 | 5,656126613 | 6,667146591 | 0,009565143 | 0,012503874 |
| acyl-CoA thioesterase 1                                                        | 0,812180631 | 4,633493455 | 6,659338471 | 0,009602983 | 0,012543986 |
| vacuolar protein sorting 8 homolog (S. cerevisiae)                             | 0,872107856 | 4,91342757  | 6,653651259 | 0,009630653 | 0,012567736 |
| vitamin K epoxide reductase complex, subunit 1                                 | 0,961796358 | 7,08715919  | 6,652656275 | 0,009635503 | 0,012567736 |
| dolichyl pyrophosphate phosphatase 1                                           | 0,82704774  | 4,997918114 | 6,650332429 | 0,009646842 | 0,012573171 |
| c-src tyrosine kinase                                                          | 0,781092553 | 9,011181596 | 6,644920141 | 0,009673311 | 0,012598301 |
| limb-bud and heart                                                             | 0,837539152 | 6,840601819 | 6,637984138 | 0,009707352 | 0,012633251 |
| phosphatidylserine synthase 2                                                  | 0,847780299 | 8,251633659 | 6,631511176 | 0,009739245 | 0,012656661 |
| solute carrier family 17 (sodium phosphate), member 1                          | 0,982765501 | 4,740779708 | 6,631402675 | 0,009739781 | 0,012656661 |
| pyridoxine 5'-phosphate oxidase                                                | 0,721985287 | 6,414965251 | 6,625890332 | 0,009767037 | 0,012682679 |
| nuclear distribution gene E homolog 1 (A nidulans)                             | 0,810322404 | 8,554515485 | 6,622864349 | 0,009782037 | 0,012692754 |
| cDNA sequence BC024659                                                         | 0,811072828 | 5,150158756 | 6,614142502 | 0,009825418 | 0,012739614 |
| G protein-coupled receptor 108                                                 | 0,925743227 | 6,520410658 | 6,607566161 | 0,009858274 | 0,012764471 |
| erythroid differentiation regulator 1                                          | 0,749971345 | 10,12312179 | 6,607390764 | 0,009859152 | 0,012764471 |
| RIKEN cDNA 1110028C15 gene                                                     | 0,751649481 | 5,642262702 | 6,603841866 | 0,009876936 | 0,01277263  |
| minichromosome maintenance deficient 2 mitotin (S. cerevisiae)                 | 0,825464184 | 5,782627224 | 6,603226019 | 0,009880026 | 0,01277263  |
| deltex 3 homolog (Drosophila)                                                  | 0,757647466 | 9,640404306 | 6,598257849 | 0,009904994 | 0,012795472 |
| pre B-cell leukemia transcription factor 3                                     | 0,874734286 | 5,230085053 | 6,585891538 | 0,009967457 | 0,012859449 |
| stannin                                                                        | 0,834808462 | 11,27080547 | 6,585549485 | 0,009969191 | 0,012859449 |
| synovial sarcoma, X member B, breakpoint 5                                     | 0,724449362 | 4,549094132 | 6,584066778 | 0,009976712 | 0,012859688 |
| neuroblastoma, suppression of tumorigenicity 1                                 | 0,797322641 | 5,648342324 | 6,58099323  | 0,010025233 | 0,01286913  |
| nudix (nucleoside diphosphate linked moiety X)-type motif 6                    | 0,967432959 | 6,721700263 | 6,579735471 | 0,009998719 | 0,01286913  |
| von Willebrand factor A domain containing 5B1                                  | 0,79160518  | 4,841766161 | 6,577531359 | 0,01000994  | 0,012870498 |
| Usher syndrome 2A (autosomal recessive, mild) homolog (human)                  | 0,794821006 | 7,856402127 | 6,576643113 | 0,010014466 | 0,012870498 |
| YEATS domain containing 4                                                      | 0,873222678 | 8,287497043 | 6,574478483 | 0,010025505 | 0,012872581 |
| transmembrane protein 208                                                      | 1,01164906  | 11,14985012 | 6,57325784  | 0,010031737 | 0,012872581 |
| microtubule-associated protein, RP/EB family, member 2                         | 0,772604194 | 5,251912623 | 6,572008953 | 0,010038117 | 0,012872581 |
| orthodenticle homolog 1 (Drosophila)                                           | 0,964454728 | 4,924333943 | 6,570239814 | 0,010047163 | 0,012873904 |
| N-ethylmaleimide sensitive fusion protein                                      | 0,926029964 | 9,416717566 | 6,56823863  | 0,010057406 | 0,012873904 |
| Duffy blood group, chemokine receptor                                          | 0,753421193 | 4,723907149 | 6,567501957 | 0,01006118  | 0,012873904 |
| ATG2 autophagy related 2 homolog A (S. cerevisiae)                             | 0,953426971 | 7,722405179 | 6,561451124 | 0,010092239 | 0,012904227 |
| transmembrane 7 superfamily member 4                                           | 0,854339476 | 6,688122481 | 6,548906546 | 0,010156981 | 0,012977542 |
| solute carrier family 44, member 1                                             | 0,847038364 | 6,062060767 | 6,547004488 | 0,010166839 | 0,012980677 |
| tuberous sclerosis 1                                                           | 0,772098433 | 5,139161225 | 6,541609415 | 0,010194861 | 0,013006698 |
| N(alpha)-acetyltransferase 40, NatD catalytic subunit, homolog (S. cerevisiae) | 0,819168213 | 8,240915046 | 6,531114538 | 0,010249624 | 0,013067339 |
| odd Oz/ten-m homolog 4 (Drosophila)                                            | 0,785201275 | 4,829240683 | 6,522380488 | 0,010295457 | 0,013116232 |
| vestigial like 3 (Drosophila)                                                  | 0,736745792 | 4,87979625  | 6,520344701 | 0,010306173 | 0,013120335 |
| transmembrane inner ear                                                        | 0,766539889 | 4,947515309 | 6,518261523 | 0,010317153 | 0,013124796 |
| dynein cytoplasmic 1 heavy chain 1                                             | 0,786165475 | 8,531597721 | 6,508086719 | 0,010370972 | 0,013183694 |
| G-protein signalling modulator 1 (AGS3-like, C. elegans)                       | 0,950716813 | 7,198392516 | 6,505886025 | 0,010382655 | 0,013188981 |
| PWWP domain containing 2B                                                      | 0,762017252 | 5,22137123  | 6,491043374 | 0,010461845 | 0,013279953 |
| bone morphogenetic protein 1                                                   | 0,841636428 | 5,891011716 | 6,480465049 | 0,010518707 | 0,013335485 |
| zinc finger, DHHC domain containing 13                                         | 0,982902705 | 8,978270504 | 6,477767036 | 0,010533266 | 0,013335485 |
| Sep (O-phosphoserine) tRNA:Sec (selenocysteine) tRNA synthase                  | 0,939362137 | 6,833571675 | 6,477309059 | 0,01053574  | 0,013335485 |
| zinc finger, DHHC domain containing 7                                          | 0,808177245 | 9,729381043 | 6,472256755 | 0,010536022 | 0,013335485 |
| ASF1 anti-silencing function 1 homolog A (S. cerevisiae)                       | 1,011246439 | 5,12396293  | 6,469625369 | 0,010577341 | 0,013378123 |
| mitochondrial ribosomal protein L15                                            | 0,950110554 | 5,555710493 | 6,46080991  | 0,010625303 | 0,013429095 |
| prune homolog (Drosophila)                                                     | 0,724043077 | 5,398447037 | 6,457360019 | 0,01064414  | 0,013443211 |
| RIKEN cDNA A830082N09 gene                                                     | 0,557691228 | 5,26795369  | 6,45219412  | 0,010672419 | 0,013469222 |
| yippee-like 5 (Drosophila)                                                     | 0,826329756 | 9,949484807 | 6,43340467  | 0,010776004 | 0,013590169 |
| zinc finger protein 954                                                        | 0,940589882 | 6,100355635 | 6,421417516 | 0,010842691 | 0,013661464 |
| natriuretic peptide receptor 3                                                 | 0,71098419  | 4,702829547 | 6,420444902 | 0,010848122 | 0,013661464 |
| protein tyrosine phosphatase 4a2                                               | 0,852699072 | 8,092529216 | 6,414851116 | 0,010879421 | 0,01368454  |
| chondroitin polymerizing factor                                                | 0,831891137 | 4,931844758 | 6,414000932 | 0,010884187 | 0,01368454  |
| protein tyrosine phosphatase, receptor type, S                                 | 0,846649782 | 9,847789728 | 6,412988718 | 0,010889865 | 0,01368454  |
| replication factor C (activator 1) 2                                           | 0,726152193 | 8,494010697 | 6,375368677 | 0,011103307 | 0,013942763 |
| amino-terminal enhancer of split                                               | 0,793488916 | 9,129999101 | 6,372797173 | 0,011118071 | 0,013951309 |
| histone deacetylase 5                                                          | 0,685520207 | 7,016732013 | 6,370116347 | 0,011133487 | 0,013953961 |
| apolipoprotein A-I binding protein                                             | 1,005231266 | 10,88721751 | 6,369661514 | 0,011136105 | 0,013953961 |
| lysosomal-associated protein transmembrane 5                                   | 0,804340409 | 13,95972062 | 6,362303221 | 0,011178555 | 0,013997148 |
| ORAI calcium release-activated calcium modulator 3                             | 0,891819759 | 7,022379562 | 6,347570613 | 0,011264107 | 0,014094204 |
| predicted gene, 19346                                                          | 0,797522267 | 5,841903453 | 6,338659717 | 0,011316217 | 0,014149307 |
| high mobility group box transcription factor 1                                 | 0,875669775 | 10,78566361 | 6,335023505 | 0,011337561 | 0,014162243 |
| transmembrane protein 115                                                      | 0,727716954 | 6,855713667 | 6,333700465 | 0,011345338 | 0,014162243 |
| zinc finger matrix type 3                                                      | 0,788391792 | 6,686354914 | 6,332651303 | 0,01135151  | 0,014162243 |
| SH3 and PX domains 2B                                                          | 0,970211761 | 8,913249029 | 6,331399607 | 0,011358878 | 0,014162243 |
| transmembrane protein 111                                                      | 0,737270927 | 6,636355508 | 6,317949162 | 0,011438401 | 0,014251256 |
| F-box protein 34                                                               | 0,819089831 | 7,743284329 | 6,3163935   | 0,01144764  | 0,014252637 |
| peroxisome proliferative activated receptor, gamma, coactivator-related 1      | 0,766231061 | 7,382845435 | 6,302736395 | 0,011529115 | 0,014343888 |
| ring finger protein 123                                                        | 0,865336655 | 5,071201334 | 6,286757266 | 0,011625288 | 0,014452519 |
| histone cluster 1, H4i                                                         | 0,772342427 | 6,914546846 | 6,285496014 | 0,011632918 | 0,014452519 |
| Sec61 alpha 1 subunit (S. cerevisiae)                                          | 0,872280523 | 7,336542901 | 6,280947481 | 0,011660483 | 0,014476506 |
| intercellular adhesion molecule 2                                              | 0,786805814 | 5,09020526  | 6,278631473 | 0,011674547 | 0,014483709 |
| YEATS domain containing 2                                                      | 0,908842071 | 7,27767865  | 6,269616715 | 0,011729475 | 0,014541563 |
| gem (nuclear organelle) associated protein 7                                   | 0,727221768 | 6,27803771  | 6,265721831 | 0,011753299 | 0,0145608   |
| katanin p60 (ATPase-containing) subunit A1                                     | 0,986190768 | 9,479208811 | 6,259393087 | 0,011792128 | 0,014598588 |

|                                                                                             |             |             |             |             |             |
|---------------------------------------------------------------------------------------------|-------------|-------------|-------------|-------------|-------------|
| negative regulator of ubiquitin-like proteins 1                                             | 0,857657601 | 9,926169697 | 6,257491744 | 0,011803822 | 0,014602752 |
| coagulation factor VIII                                                                     | 0,702459827 | 4,682717059 | 6,252290336 | 0,011835881 | 0,014632087 |
| chemokine (C-X-C motif) receptor 1                                                          | 0,92035411  | 4,661167564 | 6,243459282 | 0,011890541 | 0,014689301 |
| nuclear distribution gene E homolog 1 (A nidulans)                                          | 0,715778136 | 7,64807531  | 6,24164137  | 0,011901829 | 0,014692892 |
| transmembrane protein 144                                                                   | 0,792947085 | 4,821978055 | 6,239725176 | 0,01191374  | 0,014697246 |
| F-box and WD-40 domain protein 4                                                            | 0,719605999 | 5,326176521 | 6,236328189 | 0,01193489  | 0,014712983 |
| potassium voltage-gated channel, shaker-related subfamily, beta member 1                    | 0,706317563 | 4,922717745 | 6,233209213 | 0,011954347 | 0,014726613 |
| adiponectin receptor 1                                                                      | 0,806965573 | 10,25241376 | 6,230178994 | 0,011973285 | 0,014739585 |
| Ras association (RalGDS/AF-6) domain family member 2                                        | 0,831607382 | 10,08483643 | 6,226344221 | 0,011997301 | 0,014758785 |
| CDC14 cell division cycle 14 homolog B (S. cerevisiae)                                      | 0,865377027 | 6,348862129 | 6,19078544  | 0,012057745 | 0,014822774 |
| mab-21-like 3 (C. elegans)                                                                  | 0,926165445 | 4,794417873 | 6,209404981 | 0,012104047 | 0,014869233 |
| solute carrier family 38, member 9                                                          | 0,875440231 | 5,64165083  | 6,204317513 | 0,01213632  | 0,014898437 |
| upstream transcription factor 2                                                             | 0,771836323 | 6,056479448 | 6,194775636 | 0,012197115 | 0,014962591 |
| phosphatidic acid phosphatase type 2C                                                       | 0,831528282 | 5,908170118 | 6,19078544  | 0,012222642 | 0,01498342  |
| zinc finger protein 932                                                                     | 0,867464017 | 6,397393046 | 6,187972525 | 0,012240674 | 0,014995039 |
| GIN5 complex subunit 3 (Psf3 homolog)                                                       | 0,93065459  | 7,810602078 | 6,184209373 | 0,012264845 | 0,015014157 |
| olfactory receptor 1287                                                                     | 0,760777478 | 4,689371913 | 6,179977499 | 0,012292092 | 0,015037011 |
| sema domain, immunoglobulin domain (Ig), transmembrane domain (TM) and short cytoplasmic dc | 0,731959527 | 5,271486918 | 6,16906915  | 0,012362647 | 0,015112776 |
| GTP binding protein 3                                                                       | 0,967638492 | 7,584480999 | 6,165309076 | 0,012387075 | 0,015132085 |
| cytochrome P450, family 4, subfamily f, polypeptide 33                                      | 0,927006568 | 8,210235821 | 6,157685271 | 0,012436773 | 0,015182217 |
| sorting nexin 17                                                                            | 0,8479607   | 11,70464908 | 6,152121622 | 0,012473186 | 0,015210437 |
| electron transferring flavoprotein, beta polypeptide                                        | 0,766026118 | 9,336020842 | 6,151502853 | 0,012477244 | 0,015210437 |
| pellino 2                                                                                   | 0,962094011 | 5,249991186 | 6,149195516 | 0,012492386 | 0,015218313 |
| ancient ubiquitous protein 1                                                                | 0,925206549 | 7,4382633   | 6,141768868 | 0,012541269 | 0,015267253 |
| sine oculis-related homeobox 6 homolog (Drosophila)                                         | 0,844266238 | 4,699590602 | 6,13738208  | 0,012570247 | 0,01529191  |
| CDC like kinase 4                                                                           | 0,892607437 | 8,147518381 | 6,129361527 | 0,012623426 | 0,015345182 |
| SID1 transmembrane family, member 2                                                         | 0,814176199 | 7,312661726 | 6,12814048  | 0,012631544 | 0,015345182 |
| bicaudal C homolog 1 (Drosophila)                                                           | 0,74762939  | 5,164577114 | 6,113749517 | 0,012727681 | 0,015451263 |
| RIKEN cDNA 4930506M07 gene                                                                  | 0,940277442 | 7,40477364  | 6,104289329 | 0,012791335 | 0,015515484 |
| RAB3 GTPase activating protein subunit 2                                                    | 0,689371605 | 5,862037035 | 6,103260001 | 0,012798283 | 0,015515484 |
| zinc finger protein 362                                                                     | 0,8857699   | 9,55476782  | 6,096533523 | 0,012843793 | 0,015559228 |
| kelch repeat and BTB (POZ) domain containing 3                                              | 0,918916576 | 4,893926381 | 6,095306125 | 0,012852118 | 0,015559228 |
| polycystic kidney disease 1 homolog                                                         | 0,866020854 | 5,20958742  | 6,08165924  | 0,012945091 | 0,01566097  |
| adaptor protein complex AP-1, gamma 2 subunit                                               | 0,831669931 | 5,433448729 | 6,078824801 | 0,012964498 | 0,015673631 |
| vascular endothelial zinc finger 1                                                          | 0,879028607 | 7,863810331 | 6,073222917 | 0,013002952 | 0,015709287 |
| interleukin 6 receptor, alpha                                                               | 0,81451471  | 5,107922085 | 6,068019142 | 0,01303879  | 0,015741397 |
| WD repeat domain 46                                                                         | 0,774147782 | 5,442650446 | 6,066758361 | 0,01304749  | 0,015741397 |
| isopentenyl-diphosphate delta isomerase 2                                                   | 0,768599562 | 4,589272924 | 6,058630678 | 0,013103735 | 0,015787939 |
| Kruppel-like factor 13                                                                      | 0,919146224 | 7,182874716 | 6,058581016 | 0,013104079 | 0,015787939 |
| mitogen-activated protein kinase 3                                                          | 0,901129451 | 7,020042186 | 6,047560216 | 0,013180792 | 0,015869456 |
| S-phase kinase-associated protein 2 (p45)                                                   | 0,878001658 | 6,355180951 | 6,035712851 | 0,013263833 | 0,015958475 |
| CD200 receptor 1                                                                            | 0,835935082 | 4,736521121 | 6,030991103 | 0,013297096 | 0,015977513 |
| protein inhibitor of activated STAT 3                                                       | 0,792711144 | 7,228993707 | 6,030879342 | 0,013297884 | 0,015977513 |
| pyrroline-5-carboxylate reductase family, member 2                                          | 0,93807729  | 8,626942051 | 6,02112415  | 0,013366914 | 0,016049452 |
| DDB1 and CUL4 associated factor 4                                                           | 1,006651357 | 6,515176198 | 6,01456943  | 0,013413527 | 0,016088183 |
| cathepsin B                                                                                 | 0,745650222 | 5,399172821 | 6,014008304 | 0,013417526 | 0,016088183 |
| SH3 domain and tetratricopeptide repeats 1                                                  | 0,710836168 | 7,472211279 | 6,010694207 | 0,013441173 | 0,016104991 |
| ets variant gene 2                                                                          | 0,744285919 | 4,741037822 | 6,009470212 | 0,013449919 | 0,016104991 |
| DCN1, defective in cullin neddylation 1, domain containing 3 (S. cerevisiae)                | 0,961949738 | 5,648052766 | 5,998515572 | 0,013528482 | 0,016188006 |
| protein phosphatase 1, regulatory (inhibitor) subunit 14B                                   | 0,955046471 | 10,96528395 | 5,996726196 | 0,013541101 | 0,016192053 |
| solute carrier family 25 (mitochondrial carrier, phosphate carrier), member 26              | 0,962987693 | 6,593173841 | 5,989052741 | 0,013596771 | 0,016234475 |
| ankyrin repeat and BTB (POZ) domain containing 1                                            | 0,968039981 | 7,35493167  | 5,987745051 | 0,013606239 | 0,016234475 |
| tyrosine kinase 2                                                                           | 0,757622898 | 6,493738788 | 5,987453897 | 0,013608348 | 0,016234475 |
| eukaryotic translation initiation factor 4, gamma 1                                         | 0,827211973 | 8,761657942 | 5,986726115 | 0,013613621 | 0,016234475 |
| DPH3 homolog (KTI11, S. cerevisiae)                                                         | 0,998970749 | 5,120315651 | 5,983671358 | 0,013635782 | 0,016249847 |
| C-type lectin domain family 16, member A                                                    | 0,753443848 | 5,822330921 | 5,978539273 | 0,013673105 | 0,016283256 |
| mitochondrial ribosomal protein S31                                                         | 0,75706312  | 7,582890544 | 5,976689726 | 0,013686585 | 0,016288244 |
| RIKEN cDNA 4933400C05 gene                                                                  | 0,754901701 | 4,525915072 | 5,970516481 | 0,013731686 | 0,016321699 |
| RAD9 homolog (S. pombe)                                                                     | 0,77407398  | 6,657833654 | 5,970293599 | 0,013733318 | 0,016321699 |
| keratinocyte associated protein 2                                                           | 0,984735776 | 11,43896267 | 5,968217764 | 0,013748524 | 0,016328701 |
| asparagine-linked glycosylation 6 homolog (yeast, alpha-1,3-,glucosyltransferase)           | 0,908133774 | 7,737006446 | 5,959052348 | 0,013815896 | 0,016397607 |
| TRM1 tRNA methyltransferase 1 homolog (S. cerevisiae)                                       | 0,689388388 | 5,782868929 | 5,953369099 | 0,013857862 | 0,016431869 |
| mannoside acetylglucosaminyltransferase 4, isoenzyme B                                      | 0,807353597 | 8,764921926 | 5,952605609 | 0,01386351  | 0,016431869 |
| ribosomal protein L8                                                                        | 0,814137299 | 13,0917201  | 5,950334152 | 0,013880332 | 0,016440669 |
| RIKEN cDNA 2510012J08 gene                                                                  | 0,680312279 | 5,817053857 | 5,947211803 | 0,013903493 | 0,016457004 |
| interferon regulatory factor 2 binding protein 2                                            | 0,91742756  | 5,996391889 | 5,937499005 | 0,013975824 | 0,016531457 |
| guanine nucleotide binding protein, alpha 15                                                | 0,744355815 | 4,813368791 | 5,933873724 | 0,014002932 | 0,01654922  |
| mitochondrial ribosomal protein S23                                                         | 0,808959952 | 9,343071966 | 5,932966974 | 0,014009722 | 0,01654922  |
| sigma non-opioid intracellular receptor 1                                                   | 0,818844196 | 5,814387493 | 5,923792125 | 0,014078635 | 0,016619425 |
| liver glycogen phosphorylase                                                                | 0,974291102 | 7,013241426 | 5,920657005 | 0,014102272 | 0,016636126 |
| collagen, type I, alpha 1                                                                   | 0,719564258 | 4,779932689 | 5,91712029  | 0,014128992 | 0,016648869 |
| transmembrane protein 19                                                                    | 0,936175258 | 6,754419655 | 5,916713424 | 0,014132069 | 0,016648869 |
| HEAT repeat containing 1                                                                    | 0,807993379 | 6,094290139 | 5,915232352 | 0,014143279 | 0,016650885 |
| histone cluster 1, H2ai                                                                     | 0,806277484 | 8,211560546 | 5,908765765 | 0,01419234  | 0,016697431 |
| NADH dehydrogenase (ubiquinone) Fe-S protein 8                                              | 0,877066257 | 10,17658037 | 5,906589673 | 0,014208894 | 0,016705695 |
| retinoblastoma 1                                                                            | 0,985814832 | 9,088041389 | 5,903735359 | 0,014230641 | 0,016720049 |
| paraaxonase 2                                                                               | 0,829424045 | 11,69974951 | 5,896248697 | 0,014287862 | 0,016776037 |
| testis expressed gene 264                                                                   | 0,842902087 | 9,054644797 | 5,893283391 | 0,014310599 | 0,016791487 |
| histone cluster 1, H2bg                                                                     | 0,821420668 | 4,934946068 | 5,876841406 | 0,014437427 | 0,01692897  |
| TMF1-regulated nuclear protein 1                                                            | 0,674887843 | 4,948798744 | 5,873543987 | 0,014463018 | 0,01694764  |
| SET domain containing (lysine methyltransferase) 8                                          | 0,934729482 | 6,951268152 | 5,870868276 | 0,014483821 | 0,016953112 |

|                                                                                               |             |             |             |             |             |
|-----------------------------------------------------------------------------------------------|-------------|-------------|-------------|-------------|-------------|
| predicted gene 14461                                                                          | 0,782771044 | 4,606532639 | 5,870456018 | 0,014487029 | 0,016953112 |
| LIM domain containing 2                                                                       | 0,834618939 | 5,102528202 | 5,866674402 | 0,014516497 | 0,016965173 |
| regulatory factor X, 5 (influences HLA class II expression)                                   | 0,752264217 | 4,595642306 | 5,866649496 | 0,014516691 | 0,016965173 |
| radial spoke head 9 homolog (Chlamydomonas)                                                   | 0,786837547 | 5,665928803 | 5,855036982 | 0,014607613 | 0,017060057 |
| WD repeat domain 46                                                                           | 0,892242099 | 5,810339876 | 5,847487815 | 0,014667070 | 0,017118091 |
| poly(rC) binding protein 2                                                                    | 0,770652856 | 10,74175563 | 5,84032343  | 0,014723753 | 0,017172814 |
| itchy, E3 ubiquitin protein ligase                                                            | 0,817134205 | 7,72315372  | 5,835656293 | 0,014760814 | 0,017204592 |
| zinc finger protein 12                                                                        | 0,820208995 | 7,45444971  | 5,83241761  | 0,014786594 | 0,017219314 |
| dedicator of cytokinesis 8                                                                    | 0,902372825 | 5,877163468 | 5,831602603 | 0,01479309  | 0,017219314 |
| estrogen related receptor, alpha                                                              | 0,777507362 | 7,384072382 | 5,827999313 | 0,014821848 | 0,01724134  |
| poly(rC) binding protein 2                                                                    | 0,835065429 | 12,17615534 | 5,818227589 | 0,01490016  | 0,017320942 |
| phosphorylase kinase, gamma 2 (testis)                                                        | 0,880565283 | 7,681640357 | 5,805339609 | 0,015004172 | 0,017430294 |
| FH2 domain containing 1                                                                       | 0,730863812 | 4,918889894 | 5,803393145 | 0,015019954 | 0,017437072 |
| RIKEN cDNA 5730494M16 gene                                                                    | 0,855908298 | 6,386761269 | 5,800864777 | 0,015040481 | 0,017449347 |
| SCAN domain-containing 1                                                                      | 0,887767772 | 10,00455616 | 5,791428706 | 0,015117376 | 0,017526958 |
| microtubule associated monooxygenase, calponin and LIM domain containing 2                    | 0,795274318 | 5,120844427 | 5,786724698 | 0,015155877 | 0,017559982 |
| K(lysine) acetyltransferase 5                                                                 | 0,862200567 | 7,518405451 | 5,782676621 | 0,0151891   | 0,017586851 |
| trans-2,3-enoyl-CoA reductase                                                                 | 0,975956944 | 9,2464768   | 5,774294183 | 0,015204183 | 0,017655153 |
| heterogeneous nuclear ribonucleoprotein D                                                     | 0,870343785 | 4,64390402  | 5,772569065 | 0,015272419 | 0,017659993 |
| itchy, E3 ubiquitin protein ligase                                                            | 0,865582059 | 6,572819212 | 5,763195981 | 0,015350151 | 0,017738178 |
| cullin 4B                                                                                     | 0,772814609 | 7,122157747 | 5,76189013  | 0,015361017 | 0,01773904  |
| CWF19-like 1, cell cycle control (S. pombe)                                                   | 0,775700827 | 7,669024098 | 5,757071466 | 0,015401188 | 0,017737222 |
| chemokine (C-X-C motif) ligand 12                                                             | 0,795489652 | 4,683271262 | 5,753088054 | 0,015434487 | 0,017800432 |
| CCAAT/enhancer binding protein (C/EBP), alpha                                                 | 0,835628074 | 4,820872718 | 5,75167414  | 0,015446327 | 0,017802374 |
| apurinic/apyrimidinic endonuclease 1                                                          | 0,87595471  | 8,221370216 | 5,728347002 | 0,015643167 | 0,018017392 |
| eukaryotic translation elongation factor 2                                                    | 0,823264863 | 7,723375118 | 5,717631068 | 0,015734554 | 0,01811075  |
| ribosomal protein S6                                                                          | 0,788802058 | 12,90352036 | 5,711359982 | 0,015788318 | 0,01816071  |
| small nuclear ribonucleoprotein 25 (U11/U12)                                                  | 0,865287422 | 9,537373515 | 5,701319417 | 0,015874839 | 0,018248258 |
| NECAP endocytosis associated 1                                                                | 0,791094635 | 7,214589134 | 5,699727271 | 0,015888648 | 0,018252162 |
| ATP synthase, H+ transporting, mitochondrial F0 complex, subunit c1 (subunit 9)               | 0,941411612 | 11,04131292 | 5,691527328 | 0,015959743 | 0,018321827 |
| N-acylsphingosine amidohydrolase 1                                                            | 0,813080528 | 8,468168315 | 5,684818913 | 0,01601821  | 0,018376912 |
| transmembrane protein 132A                                                                    | 0,636533847 | 5,121735867 | 5,680657529 | 0,016054602 | 0,018406617 |
| serine/threonine kinase 25 (yeast)                                                            | 0,821337322 | 6,257489489 | 5,66140836  | 0,016224177 | 0,018588877 |
| quinoid dihydropteridine reductase                                                            | 0,950082985 | 8,128123312 | 5,652936289 | 0,016249461 | 0,018662936 |
| angiogenin, ribonuclease, RNase A family, 5                                                   | 0,866787248 | 4,971180816 | 5,650144908 | 0,016324354 | 0,018679238 |
| StAR-related lipid transfer (START) domain containing 5                                       | 0,779537325 | 7,696666383 | 5,648826496 | 0,016336126 | 0,018680515 |
| fibulin 1                                                                                     | 0,822925029 | 4,803675875 | 5,633593411 | 0,016472853 | 0,018800404 |
| echinoderm microtubule associated protein like 1                                              | 0,845368057 | 4,687203796 | 5,633414105 | 0,01647447  | 0,018800404 |
| osteopetrosis associated transmembrane protein 1                                              | 0,836587938 | 10,45506046 | 5,631482705 | 0,016491901 | 0,018800404 |
| prune homolog (Drosophila)                                                                    | 0,911665975 | 5,470577108 | 5,631475286 | 0,016491968 | 0,018800404 |
| HCLS1 binding protein 3                                                                       | 0,828827221 | 5,01568795  | 5,631184598 | 0,016494593 | 0,018800404 |
| breast cancer metastasis-suppressor 1-like                                                    | 0,945035544 | 7,679170696 | 5,625319917 | 0,016547662 | 0,018848637 |
| core binding factor beta                                                                      | 0,872041298 | 10,67972179 | 5,62112189  | 0,01658577  | 0,018879776 |
| 3-hydroxy-3-methylglutaryl-Coenzyme A lyase                                                   | 0,865273275 | 10,56037196 | 5,595489131 | 0,016820648 | 0,019124779 |
| colony stimulating factor 3 receptor (granulocyte)                                            | 0,755245809 | 5,325170051 | 5,595253624 | 0,016822823 | 0,019124779 |
| ring finger protein 181                                                                       | 0,945412713 | 11,33858739 | 5,589401492 | 0,016876989 | 0,019173922 |
| tyrosine kinase 2                                                                             | 0,942201743 | 6,094205706 | 5,585240858 | 0,01691562  | 0,019205364 |
| Ras-GTPase-activating protein SH3-domain binding protein 1                                    | 0,99047972  | 10,4625424  | 5,563248111 | 0,017121514 | 0,019410371 |
| zinc finger protein 318                                                                       | 0,989573567 | 7,905484099 | 5,562521413 | 0,017128366 | 0,019410371 |
| RAB42, member RAS oncogene family, pseudogene                                                 | 0,763701694 | 4,855555679 | 5,560928625 | 0,017143396 | 0,019410371 |
| chromatin assembly factor 1, subunit B (p60)                                                  | 0,789531755 | 6,729839697 | 5,560306474 | 0,017149271 | 0,019410371 |
| acylpeptide hydrolase                                                                         | 0,987816571 | 10,80079447 | 5,560065318 | 0,017151548 | 0,019410371 |
| Sfi1 homolog, spindle assembly associated (yeast)                                             | 0,740759734 | 5,363169706 | 5,55643352  | 0,017185894 | 0,019436691 |
| histone cluster 1, H2an                                                                       | 0,886783059 | 7,212370089 | 5,552722874 | 0,017221066 | 0,019463913 |
| diaphanous homolog 1 (Drosophila)                                                             | 0,86187472  | 6,481447731 | 5,54960896  | 0,017250646 | 0,019475069 |
| phosphatidylserine decarboxylase, pseudogene 2                                                | 0,734610496 | 5,382113788 | 5,549344978 | 0,017253156 | 0,019475069 |
| interleukin 18 receptor accessory protein                                                     | 0,927549769 | 4,801284501 | 5,537947649 | 0,017361938 | 0,019585249 |
| lysosomal-associated membrane protein 2                                                       | 0,931120484 | 10,32973024 | 5,528043909 | 0,017457103 | 0,019679937 |
| methyltransferase like 8                                                                      | 0,826978737 | 4,853760416 | 5,524638609 | 0,017489963 | 0,019704309 |
| pelota homolog (Drosophila)                                                                   | 0,971450811 | 9,417177344 | 5,517337434 | 0,017560656 | 0,019771246 |
| predicted pseudogene 6987                                                                     | 0,823079887 | 4,685050124 | 5,50782098  | 0,01765329  | 0,019862784 |
| branched chain ketoacid dehydrogenase kinase                                                  | 0,86676983  | 7,549655268 | 5,50482444  | 0,017682575 | 0,019882972 |
| CDC-like kinase 2                                                                             | 0,78349111  | 7,820792704 | 5,498466522 | 0,017744894 | 0,019940256 |
| ribosome binding protein 1                                                                    | 0,928612425 | 6,631224029 | 5,491298797 | 0,017815453 | 0,02000672  |
| SWI/SNF related matrix associated, actin dependent regulator of chromatin, subfamily a-like 1 | 0,710106355 | 5,660624799 | 5,481201872 | 0,017915394 | 0,020106073 |
| zinc finger protein 592                                                                       | 0,901765497 | 6,842476198 | 5,474160551 | 0,01798547  | 0,020171804 |
| RAB1B, member RAS oncogene family                                                             | 0,883637624 | 5,210342247 | 5,464300485 | 0,018084128 | 0,020269487 |
| bromodomain PHD finger transcription factor                                                   | 0,881731375 | 4,723540477 | 5,453659959 | 0,018191292 | 0,020376572 |
| RAB7, member RAS oncogene family-like 1                                                       | 0,89159519  | 9,555596123 | 5,443927843 | 0,018289488 | 0,020470072 |
| PHD finger protein 20-like 1                                                                  | 0,78539462  | 5,335883434 | 5,443124208 | 0,018298119 | 0,020470072 |
| kallikrein 1-related peptidase b5                                                             | 0,803794453 | 4,668199926 | 5,427524191 | 0,018457619 | 0,020635336 |
| RIKEN cDNA 1810043H04 gene                                                                    | 0,871109233 | 7,212450524 | 5,423099977 | 0,018503144 | 0,020673047 |
| cornichon homolog 4 (Drosophila)                                                              | 0,948169304 | 10,40077396 | 5,41827453  | 0,018552944 | 0,020710813 |
| predicted gene 5150                                                                           | 0,933322521 | 4,749417634 | 5,41753639  | 0,018560575 | 0,020710813 |
| CCR4-NOT transcription complex, subunit 3                                                     | 0,777153166 | 6,810909933 | 5,414018994 | 0,018596989 | 0,020738246 |
| shisa homolog 4 (Xenopus laevis)                                                              | 0,777527523 | 4,61678119  | 5,403220748 | 0,018709293 | 0,020850217 |
| replication factor C (activator 1) 2                                                          | 0,807202034 | 7,881665327 | 5,394320415 | 0,018802443 | 0,020940713 |
| lymphocyte antigen 6 complex, locus E                                                         | 0,763268336 | 9,587081402 | 5,390457903 | 0,018843033 | 0,020972595 |
| fibroblast growth factor (acidic) intracellular binding protein                               | 0,871130731 | 9,152695189 | 5,387767902 | 0,018871361 | 0,020990797 |
| widely-interspaced zinc finger motifs                                                         | 0,78414043  | 5,662575516 | 5,386192118 | 0,018887978 | 0,020995958 |
| transmembrane channel-like gene family 6                                                      | 0,855893971 | 7,086157919 | 5,362837058 | 0,019136239 | 0,021258446 |

|                                                                                   |             |             |             |             |             |
|-----------------------------------------------------------------------------------|-------------|-------------|-------------|-------------|-------------|
| nuclear mitotic apparatus protein 1                                               | 0,700822234 | 6,266559229 | 5,35854601  | 0,019182258 | 0,021296073 |
| RD RNA-binding protein                                                            | 0,890833111 | 8,655318986 | 5,356991993 | 0,019198956 | 0,02130112  |
| olfactory receptor 372                                                            | 0,789688165 | 4,668640698 | 5,352477071 | 0,019247561 | 0,02134154  |
| RAD54 homolog B (S. cerevisiae)                                                   | 0,807297823 | 4,817429812 | 5,349378659 | 0,019280999 | 0,021365102 |
| tumor necrosis factor receptor superfamily, member 1a                             | 0,813409103 | 5,646097313 | 5,344850475 | 0,019329987 | 0,021405854 |
| RIKEN cDNA A930005H10 gene                                                        | 0,710932343 | 5,007679188 | 5,337809559 | 0,019406442 | 0,021476952 |
| SUMO/sentrin specific peptidase 3                                                 | 0,810828129 | 9,075093975 | 5,334644289 | 0,019440925 | 0,021501541 |
| RIKEN cDNA 2500003M10 gene                                                        | 0,972217968 | 10,50371512 | 5,332654637 | 0,019462637 | 0,021511982 |
| annexin A3                                                                        | 0,895209969 | 13,22580956 | 5,329449011 | 0,019497677 | 0,021537131 |
| nucleolar complex associated 2 homolog (S. cerevisiae)                            | 0,881863142 | 8,25281805  | 5,324402742 | 0,019552983 | 0,021580694 |
| methionine-tRNA synthetase 2 (mitochondrial)                                      | 0,937407494 | 5,405194644 | 5,323605545 | 0,019561736 | 0,021580694 |
| solute carrier family 45, member 4                                                | 0,767951133 | 5,741874656 | 5,322444267 | 0,019574495 | 0,021581189 |
| DEAD (Asp-Glu-Ala-Asp) box polypeptide 51                                         | 0,843401581 | 7,349212601 | 5,318113191 | 0,019622166 | 0,021620149 |
| sphingosine phosphate lyase 1                                                     | 0,817581998 | 8,593163506 | 5,312331954 | 0,019686007 | 0,021663483 |
| chemokine-like factor                                                             | 0,925203996 | 8,677236566 | 5,312313446 | 0,019686211 | 0,021663483 |
| transmembrane protein 106C                                                        | 0,969024673 | 7,680124947 | 5,299541225 | 0,019828099 | 0,021805933 |
| sorting nexin 33                                                                  | 0,740530404 | 5,516086947 | 5,297954071 | 0,019845812 | 0,02181173  |
| zinc finger protein 579                                                           | 0,75799545  | 7,158455335 | 5,295015966 | 0,0203331   | 0,021834132 |
| BCL2-associated athanogene 4                                                      | 0,877965912 | 7,701215183 | 5,293694058 | 0,019893446 | 0,021836701 |
| lysyl oxidase-like 4                                                              | 0,808531239 | 4,63367643  | 5,291052278 | 0,019923051 | 0,021855513 |
| dynactin 6                                                                        | 0,848937284 | 8,61676212  | 5,281002116 | 0,020036142 | 0,021965827 |
| polo-like kinase 1 substrate 1                                                    | 0,812291526 | 6,056890524 | 5,274552318 | 0,020109107 | 0,02203204  |
| elongation factor Tu GTP binding domain containing 1                              | 0,819719707 | 5,56478171  | 5,267564816 | 0,020188499 | 0,022105208 |
| coronin, actin binding protein 1A                                                 | 0,930523295 | 12,78807512 | 5,2664447   | 0,020201259 | 0,022105373 |
| TEA domain family member 2                                                        | 0,757666528 | 4,821984133 | 5,257368983 | 0,020304989 | 0,022205019 |
| NADH dehydrogenase (ubiquinone) 1 alpha subcomplex, assembly factor 4             | 0,945569621 | 8,69671735  | 5,254918612 | 0,0203331   | 0,022221898 |
| hypothetical LOC100502854                                                         | 0,96164528  | 6,090022285 | 5,239015189 | 0,020516635 | 0,022408512 |
| zinc finger, DHHC domain containing 3                                             | 0,865319174 | 6,182893983 | 5,236527835 | 0,020545512 | 0,022426079 |
| capping protein (actin filament) muscle Z-line, beta                              | 0,786391881 | 5,505710838 | 5,22242042  | 0,020710177 | 0,022591749 |
| polypyrimidine tract binding protein 1                                            | 0,970351321 | 4,845972639 | 5,214688212 | 0,020801071 | 0,02266836  |
| guanine nucleotide binding protein-like 1                                         | 0,843105173 | 7,613152536 | 5,214247124 | 0,02080627  | 0,02266836  |
| selectin, platelet                                                                | 0,769908497 | 4,968758198 | 5,209659786 | 0,020860427 | 0,022713247 |
| CDC42 small effector 1                                                            | 0,861692447 | 7,569466355 | 5,200723615 | 0,02096639  | 0,022814451 |
| TBC1 domain family, member 10c                                                    | 0,957120152 | 5,209831228 | 5,183055782 | 0,021177712 | 0,023030105 |
| cytochrome c oxidase subunit IV isoform 1                                         | 0,841432151 | 12,9850349  | 5,178654897 | 0,02123073  | 0,023061496 |
| pregnancy-specific glycoprotein 23                                                | 0,940826328 | 5,489967572 | 5,178475945 | 0,021232889 | 0,023061496 |
| histone deacetylase 5                                                             | 0,724704562 | 4,979801558 | 5,176768802 | 0,021253498 | 0,023069587 |
| signal recognition particle receptor, B subunit                                   | 0,874710897 | 4,980655787 | 5,160601599 | 0,021449817 | 0,023268273 |
| S-adenosylhomocysteine hydrolase                                                  | 0,882891624 | 6,372084059 | 5,13611611  | 0,021751119 | 0,023580527 |
| RAS-like, family 11, member B                                                     | 0,752592332 | 5,191537331 | 5,129940962 | 0,021827871 | 0,023649108 |
| phospholipase D2                                                                  | 0,956831492 | 6,037981359 | 5,124199122 | 0,021899515 | 0,023704879 |
| mitochondrial ribosomal protein L34                                               | 0,835921597 | 9,080408881 | 5,123649165 | 0,021906392 | 0,023704879 |
| motile sperm domain containing 3                                                  | 0,724332471 | 5,273415646 | 5,122390845 | 0,021922134 | 0,02370728  |
| zinc finger protein 28                                                            | 0,956176208 | 4,678771902 | 5,119502737 | 0,021958316 | 0,023731768 |
| CDKN2A interacting protein N-terminal like                                        | 0,769561869 | 8,743364754 | 5,115025816 | 0,022014537 | 0,02377787  |
| erythroid differentiation regulator 1                                             | 0,853993865 | 5,103051221 | 5,112483294 | 0,022046539 | 0,023797773 |
| vacuolar protein sorting 16 (yeast)                                               | 0,823840531 | 9,230443239 | 5,105471578 | 0,022135072 | 0,023878635 |
| transmembrane protease, serine 2                                                  | 0,709148501 | 4,954085556 | 5,103377118 | 0,022161597 | 0,023892545 |
| cytochrome P450, family 4, subfamily f, polypeptide 16                            | 0,847701388 | 5,88682626  | 5,101955542 | 0,02217962  | 0,02389728  |
| zinc finger protein 28                                                            | 0,879064192 | 7,088385033 | 5,094816806 | 0,022270385 | 0,023980335 |
| CDP-diacylglycerol synthase 1                                                     | 0,736332858 | 5,891810108 | 5,093137839 | 0,022291794 | 0,023988652 |
| hypothetical LOC100504137                                                         | 0,769074288 | 4,654948824 | 5,076892049 | 0,022500171 | 0,024198037 |
| clathrin, light polypeptide (Lcb)                                                 | 0,848035591 | 5,865434275 | 5,06275717  | 0,022683291 | 0,024380018 |
| activating transcription factor 7 interacting protein                             | 0,929481211 | 8,722021017 | 5,050726571 | 0,022840497 | 0,024533941 |
| AKT1 substrate 1 (proline-rich)                                                   | 0,78586297  | 7,442096794 | 5,031102231 | 0,02309962  | 0,024797082 |
| signal sequence receptor, delta                                                   | 0,901235341 | 11,94026401 | 5,02500986  | 0,02318075  | 0,024868944 |
| cyclin-dependent kinase 9 (CDC2-related kinase)                                   | 0,804987431 | 6,949096787 | 5,020446425 | 0,023241733 | 0,024914498 |
| Dnaj (Hsp40) homolog, subfamily C, member 13                                      | 0,799049134 | 8,1993601   | 5,019706648 | 0,023251636 | 0,024914498 |
| rabaptin, RAB GTPase binding effector protein 2                                   | 0,85042348  | 7,048926666 | 5,017978166 | 0,023274794 | 0,024924077 |
| galactose-1-phosphate uridylyl transferase                                        | 0,702522498 | 6,26626837  | 5,008251769 | 0,023405601 | 0,025048851 |
| ankyrin repeat and SAM domain containing 1                                        | 0,785212301 | 5,949832404 | 5,00572938  | 0,023439661 | 0,025069997 |
| non-SMC condensin II complex, subunit G2                                          | 0,76693025  | 5,007688308 | 5,001325293 | 0,023499266 | 0,025118423 |
| ATP-binding cassette, sub-family B (MDR/TAP), member 8                            | 0,838374915 | 5,759915151 | 4,996348005 | 0,023566838 | 0,0251753   |
| regulator of telomere elongation helicase 1                                       | 0,805034585 | 5,775981568 | 4,992394538 | 0,02362067  | 0,025212526 |
| retinitis pigmentosa 9 (human)                                                    | 0,870918094 | 9,04296776  | 4,991055962 | 0,023638928 | 0,025212526 |
| frizzled homolog 5 (Drosophila)                                                   | 0,765019913 | 6,45030831  | 4,990623295 | 0,023644833 | 0,025212526 |
| protein kinase N1                                                                 | 0,727714531 | 5,275300456 | 4,982804708 | 0,023751835 | 0,025311226 |
| RIKEN cDNA 2210404J11 gene                                                        | 0,922659103 | 7,516545519 | 4,973601821 | 0,023878493 | 0,02543074  |
| phosphofruktokinase, muscle                                                       | 0,824123899 | 6,104137265 | 4,958482644 | 0,024088262 | 0,025638569 |
| dihydroliipoamide S-succinyltransferase (E2 component of 2-oxo-glutarate complex) | 0,841128183 | 9,133389708 | 4,953440006 | 0,024158695 | 0,025697932 |
| asparagine-linked glycosylation 3 homolog (yeast, alpha-1,3-mannosyltransferase)  | 0,880889659 | 6,226400519 | 4,95226538  | 0,024175135 | 0,025699826 |
| RIKEN cDNA 1110014N23 gene                                                        | 0,83026371  | 9,6490171   | 4,949459223 | 0,024214463 | 0,025726033 |
| Max dimerization protein 4                                                        | 0,752060265 | 5,170514511 | 4,946848344 | 0,02425112  | 0,025749372 |
| reticulon 3                                                                       | 0,879265281 | 9,415060052 | 4,945580844 | 0,024268939 | 0,025752693 |
| septin 6                                                                          | 0,796621642 | 4,552772499 | 4,930066127 | 0,024488268 | 0,025963085 |
| receptor accessory protein 4                                                      | 0,78304484  | 6,67445717  | 4,929463698 | 0,02449683  | 0,025963085 |
| secretion regulating guanine nucleotide exchange factor                           | 0,859415736 | 6,937405816 | 4,926871176 | 0,024533716 | 0,025986468 |
| zinc finger protein 862                                                           | 0,795205829 | 6,745164982 | 4,923121744 | 0,024587175 | 0,026027366 |
| cell growth regulator with ring finger domain 1                                   | 0,800222591 | 6,833184786 | 4,915895891 | 0,024690579 | 0,026121053 |
| STT3, subunit of the oligosaccharyltransferase complex, homolog B (S. cerevisiae) | 0,897458425 | 5,73580688  | 4,910003874 | 0,024775263 | 0,026194835 |
| SEC16 homolog A (S. cerevisiae)                                                   | 0,775511921 | 8,59253538  | 4,900727187 | 0,024909271 | 0,026320647 |

|                                                                                              |             |             |             |             |             |
|----------------------------------------------------------------------------------------------|-------------|-------------|-------------|-------------|-------------|
| LIM domain containing preferred translocation partner in lipoma                              | 0,835762832 | 5,393769883 | 4,899361353 | 0,024929072 | 0,026325701 |
| ADP-ribosyltransferase 4                                                                     | 0,815479094 | 4,835777129 | 4,892018754 | 0,025035828 | 0,02642252  |
| plectin                                                                                      | 0,898364814 | 6,168834325 | 4,890455075 | 0,02505863  | 0,026428058 |
| high mobility group nucleosomal binding domain 1                                             | 0,826271617 | 10,73591509 | 4,88959191  | 0,025071227 | 0,026428058 |
| testis expressed gene 2                                                                      | 0,805546349 | 4,875053623 | 4,885666906 | 0,025128601 | 0,026472619 |
| hairy and enhancer of split 6 (Drosophila)                                                   | 0,814757892 | 8,132336856 | 4,882595177 | 0,025173608 | 0,026504105 |
| gelsolin                                                                                     | 0,759345108 | 6,07603594  | 4,881035819 | 0,025196491 | 0,026512274 |
| fibronectin type III domain containing 5                                                     | 0,773565792 | 5,155028615 | 4,875375296 | 0,025279757 | 0,026579476 |
| ubiquitin associated protein 2-like                                                          | 0,786122495 | 6,409040907 | 4,87438896  | 0,025294298 | 0,026579476 |
| phospholipase C-like 2                                                                       | 0,939853821 | 8,623595622 | 4,873358283 | 0,025309503 | 0,026579476 |
| solute carrier family 22, member 23                                                          | 0,883787542 | 7,876878806 | 4,872578991 | 0,025321007 | 0,026579476 |
| leucine zipper protein 1                                                                     | 0,868479042 | 8,682907173 | 4,868886945 | 0,025375589 | 0,02662083  |
| ubiquitin associated protein 2-like                                                          | 0,890731091 | 7,307675001 | 4,864582098 | 0,025439401 | 0,026671812 |
| lymphocyte antigen 6 complex, locus E                                                        | 0,756449786 | 7,854493208 | 4,861984214 | 0,025477999 | 0,026682352 |
| ORAI calcium release-activated calcium modulator 2                                           | 0,809476852 | 4,570466221 | 4,861856626 | 0,025479896 | 0,026682352 |
| nardilysin, N-arginine dibasic convertase, NRD convertase 1                                  | 0,818853476 | 10,05416308 | 4,859657603 | 0,025512623 | 0,026700674 |
| SAR1 gene homolog B (S. cerevisiae)                                                          | 0,879133455 | 9,872638474 | 4,838185301 | 0,025834734 | 0,027021652 |
| DNA methyltransferase 3B                                                                     | 0,8468488   | 5,469196203 | 4,83126353  | 0,025939561 | 0,027115117 |
| malectin                                                                                     | 0,922434954 | 6,061660603 | 4,826146182 | 0,026017375 | 0,027180249 |
| kelch repeat and BTB (POZ) domain containing 7                                               | 0,8227098   | 6,164116291 | 4,824261416 | 0,026046102 | 0,027194054 |
| phosphatidylinositol 4-kinase type 2 beta                                                    | 0,826122795 | 8,404788799 | 4,819785932 | 0,026114461 | 0,027249197 |
| aarF domain containing kinase 1                                                              | 0,851639868 | 6,089979642 | 4,818291279 | 0,026137337 | 0,027256842 |
| cytochrome b-561 domain containing 1                                                         | 0,865065915 | 7,229106811 | 4,809588516 | 0,026270989 | 0,027368031 |
| hypoxia inducible factor 3, alpha subunit                                                    | 0,850057274 | 4,708980155 | 4,808975761 | 0,026280428 | 0,027368031 |
| methylenetetrahydrofolate dehydrogenase (NADP+ dependent), methylenetetrahydrofolate cyclohy | 0,931187638 | 6,771082924 | 4,808303116 | 0,026290795 | 0,027368031 |
| tetraspanin 17                                                                               | 0,827028021 | 6,090870371 | 4,794873536 | 0,026489759 | 0,027568146 |
| shroom family member 1                                                                       | 0,744353636 | 4,632628102 | 4,775080193 | 0,026808718 | 0,027874071 |
| Rab40c, member RAS oncogene family                                                           | 0,853096216 | 8,9716614   | 4,743296862 | 0,027315177 | 0,028383821 |
| solute carrier family 12 (potassium/chloride transporters), member 9                         | 0,920892511 | 5,874088043 | 4,741578675 | 0,027342867 | 0,028395762 |
| DnaJ (Hsp40) homolog, subfamily A, member 4                                                  | 0,897023378 | 5,63832804  | 4,738460967 | 0,027393193 | 0,028431183 |
| oxysterol binding protein-like 8                                                             | 0,747154521 | 5,93108752  | 4,737363783 | 0,02741093  | 0,028432757 |
| H2A histone family, member J                                                                 | 0,845998211 | 5,942249163 | 4,728203458 | 0,027559523 | 0,028569984 |
| zinc finger CCCH-type containing 4                                                           | 0,826013061 | 8,159660253 | 4,72251447  | 0,027652271 | 0,028649191 |
| myosin IC                                                                                    | 0,906743426 | 5,710437846 | 4,704198006 | 0,027953327 | 0,028943994 |
| RIKEN cDNA 1700021F05 gene                                                                   | 0,946776048 | 8,947819717 | 4,695342793 | 0,028100221 | 0,029078918 |
| metallo-beta-lactamase domain containing 1                                                   | 0,917987745 | 5,724641389 | 4,692374842 | 0,028149652 | 0,029112885 |
| N-terminal Asn amidase                                                                       | 0,922883415 | 9,412694473 | 4,689943004 | 0,028190229 | 0,029137666 |
| WW domain containing E3 ubiquitin protein ligase 1                                           | 0,896545789 | 5,866039664 | 4,678388703 | 0,028383939 | 0,029320593 |
| nucleoporin 107                                                                              | 0,851266156 | 5,516632477 | 4,674835763 | 0,028443812 | 0,029365136 |
| dedicator of cytokinesis 4                                                                   | 0,750028215 | 5,812607511 | 4,67283201  | 0,028477642 | 0,029382758 |
| transmembrane protein 20                                                                     | 0,824560576 | 5,557199187 | 4,66749249  | 0,028568016 | 0,029444091 |
| zinc finger, FYVE domain containing 27                                                       | 0,858821725 | 5,796152256 | 4,667335496 | 0,028570678 | 0,029444091 |
| dual specificity phosphatase 13                                                              | 0,766434351 | 4,901806525 | 4,663865303 | 0,028629596 | 0,029487474 |
| GPI anchor attachment protein 1                                                              | 0,816462339 | 5,844792111 | 4,662743472 | 0,028648672 | 0,029489796 |
| galactosidase, beta 1-like                                                                   | 0,939012436 | 4,926640679 | 4,657226089 | 0,028742706 | 0,029569228 |
| solute carrier family 35, member B3                                                          | 0,823377124 | 9,6126905   | 4,654062306 | 0,028796375 | 0,029600788 |
| RIKEN cDNA 4930451C15 gene                                                                   | 0,87424883  | 4,756487001 | 4,653456507 | 0,028807156 | 0,029600788 |
| cytochrome c-1                                                                               | 0,894616493 | 9,8560033   | 4,635935114 | 0,029108907 | 0,02989333  |
| transducin (beta)-like 1X-linked receptor 1                                                  | 0,813147419 | 7,581088588 | 4,630151576 | 0,029209305 | 0,029978871 |
| retinoic acid receptor responder (tazarotene induced) 1                                      | 0,820971261 | 4,836303347 | 4,614127952 | 0,029489543 | 0,030248783 |
| mitochondrial ribosomal protein L12                                                          | 0,841467192 | 10,05384779 | 4,59954889  | 0,029747199 | 0,030495228 |
| cytoplasmic polyadenylation element binding protein 2                                        | 0,833281943 | 5,72578557  | 4,592632904 | 0,029870328 | 0,030603556 |
| nucleobindin 1                                                                               | 0,869723849 | 8,617960845 | 4,584826617 | 0,030010009 | 0,030718242 |
| COX19 cytochrome c oxidase assembly homolog (S. cerevisiae)                                  | 0,933795415 | 9,092554768 | 4,584419601 | 0,030017313 | 0,030718242 |
| RAB8A, member RAS oncogene family                                                            | 0,895006469 | 12,10688885 | 4,577175845 | 0,030147635 | 0,030833608 |
| bone morphogenetic protein 1                                                                 | 0,818377812 | 6,238196467 | 4,554916812 | 0,030552177 | 0,031229135 |
| annexin A6                                                                                   | 0,898431397 | 8,581381391 | 4,548936696 | 0,03066192  | 0,031323045 |
| RIKEN cDNA 9830001H06 gene                                                                   | 0,827382909 | 5,509998686 | 4,546636968 | 0,030704243 | 0,031348013 |
| kin of IRRE like (Drosophila)                                                                | 0,84919169  | 5,540395797 | 4,535987033 | 0,030901115 | 0,031530649 |
| NIMA (never in mitosis gene a)-related expressed kinase 3                                    | 0,848567661 | 4,943397451 | 4,529141015 | 0,031028433 | 0,031642143 |
| adenosine deaminase-like                                                                     | 0,852932533 | 4,916935524 | 4,512702938 | 0,031336603 | 0,031937828 |
| dual specificity phosphatase 27 (putative)                                                   | 0,830683313 | 4,772004587 | 4,48347579  | 0,031893242 | 0,03248626  |
| neural precursor cell expressed, developmentally down-regulated gene 1                       | 0,871743336 | 7,933041876 | 4,476920907 | 0,032019634 | 0,032596061 |
| F-box protein 3                                                                              | 0,903918754 | 6,853514346 | 4,471618878 | 0,032122287 | 0,032681584 |
| polymerase (DNA-directed), delta interacting protein 2                                       | 0,881691494 | 8,826295664 | 4,462820121 | 0,032293476 | 0,032836696 |
| cyclin D3                                                                                    | 0,904293951 | 8,706910539 | 4,453731819 | 0,032471398 | 0,03299847  |
| cleft lip and palate associated transmembrane protein 1                                      | 0,876949602 | 7,950627791 | 4,449450358 | 0,032555605 | 0,033064876 |
| component of oligomeric golgi complex 7                                                      | 0,814234039 | 5,555389482 | 4,444336997 | 0,032656503 | 0,033148147 |
| protein phosphatase 2, regulatory subunit B, delta isoform                                   | 0,835563361 | 8,602968606 | 4,438043694 | 0,032781176 | 0,033255441 |
| ectonucleotide pyrophosphatase/phosphodiesterase 7                                           | 0,87395641  | 4,634309578 | 4,43561334  | 0,032829468 | 0,033264738 |
| tubulin-specific chaperone d                                                                 | 0,893065436 | 8,055999183 | 4,434882048 | 0,032844015 | 0,033264738 |
| BTB (POZ) domain containing 1                                                                | 0,906671249 | 8,148016476 | 4,43471857  | 0,032847268 | 0,033264738 |
| zinc finger protein 704                                                                      | 0,893071239 | 6,739808975 | 4,430725537 | 0,032926839 | 0,033326067 |
| ARP1 actin-related protein 1 homolog A, contractin alpha (yeast)                             | 0,906749849 | 10,38997158 | 4,42442286  | 0,033052884 | 0,033434337 |
| myosin IXa                                                                                   | 0,898120901 | 5,772061112 | 4,421667199 | 0,033108167 | 0,033443633 |
| patatin-like phospholipase domain containing 2                                               | 0,840315744 | 10,76364106 | 4,421391637 | 0,033113701 | 0,033443633 |
| tRNA splicing endonuclease 2 homolog (S. cerevisiae)                                         | 0,84416009  | 5,360812525 | 4,4211125   | 0,033119308 | 0,033443633 |
| RD RNA-binding protein                                                                       | 0,826925426 | 8,836373772 | 4,405093635 | 0,033442907 | 0,03375096  |
| hairy and enhancer of split 6 (Drosophila)                                                   | 0,803824012 | 6,147163707 | 4,403943494 | 0,033466281 | 0,033755115 |
| phosphoprotein enriched in astrocytes 15A                                                    | 0,884068368 | 7,135234471 | 4,395833124 | 0,033631634 | 0,033902388 |
| RIKEN cDNA 2610029G23 gene                                                                   | 0,859382281 | 9,617808191 | 4,373335996 | 0,034095227 | 0,034349961 |

|                                                                   |             |             |             |             |             |
|-------------------------------------------------------------------|-------------|-------------|-------------|-------------|-------------|
| macrophage expressed gene 1                                       | 0,759836274 | 5,660635128 | 4,342365141 | 0,034745475 | 0,034984961 |
| integrin beta 1 binding protein 1                                 | 0,842914259 | 9,308923331 | 4,331760971 | 0,034971374 | 0,035192204 |
| choline kinase alpha                                              | 0,845058576 | 4,990233932 | 4,304853295 | 0,035552184 | 0,035756155 |
| ralA binding protein 1                                            | 0,863765643 | 9,777517423 | 4,290414837 | 0,035868398 | 0,036053499 |
| intercellular adhesion molecule 4, Landsteiner-Wiener blood group | 0,841203191 | 5,016384795 | 4,277285216 | 0,036158751 | 0,036324521 |
| nasal embryonic LHRH factor                                       | 0,802973189 | 6,41401319  | 4,262877534 | 0,036480472 | 0,036626729 |
| AFG3(ATPase family gene 3)-like 1 (yeast)                         | 0,867301007 | 7,229581569 | 4,254477434 | 0,03666956  | 0,0367955   |
| ATPase, H+ transporting, lysosomal accessory protein 2            | 0,89522572  | 9,858759276 | 4,25002219  | 0,036770304 | 0,036875483 |
| transmembrane protein 183A                                        | 0,885189291 | 7,289652095 | 4,248078018 | 0,036814367 | 0,036898562 |
| endothelial PAS domain protein 1                                  | 0,857372383 | 4,558539811 | 4,240202636 | 0,036993472 | 0,037056889 |
| staphylococcal nuclease and tudor domain containing 1             | 0,833913659 | 6,29626819  | 4,232048158 | 0,037179979 | 0,037222446 |
| transmembrane protein 111                                         | 0,878955208 | 10,88037258 | 4,20346784  | 0,037842224 | 0,037863823 |
| RIKEN cDNA 2410016006 gene                                        | 0,87132121  | 8,438005893 | 4,190360676 | 0,038150452 | 0,038150452 |

**Panel 7: Genes significantly down-regulated in *Porphyromonas gingivalis* treated DCs (FDR < 0.05) and up-regulated in response to *Aggregatibacter actinomycetemcomitans* challenge.**

| Name                                                        | FC Pg       | AveExpr     | F           | P.Value  | adj.P.Val |
|-------------------------------------------------------------|-------------|-------------|-------------|----------|-----------|
| F-box protein 32                                            | 0,685794387 | 5,755409889 | 181,2808552 | 1,51E-10 | 2,11E-09  |
| interferon-induced protein with tetratricopeptide repeats 3 | 0,594603952 | 6,615851146 | 143,8407912 | 6,85E-10 | 4,80E-09  |
| decorin                                                     | 0,544599894 | 6,58714326  | 57,35822318 | 2,30E-07 | 1,07E-06  |
| acid phosphatase 6, lysophosphatidic                        | 0,697614737 | 6,642894336 | 42,96435134 | 1,30E-06 | 4,55E-06  |
| dystrophia myotonia-containing WD repeat motif              | 0,696759172 | 5,280681459 | 39,79381694 | 2,04E-06 | 5,11E-06  |
| calpain 5                                                   | 0,609042775 | 6,632619037 | 38,77700806 | 2,37E-06 | 5,11E-06  |
| mitochondrial ribosomal protein S6                          | 0,731804771 | 9,008296384 | 38,02572133 | 2,65E-06 | 5,11E-06  |
| ras homolog gene family, member C                           | 0,692222971 | 7,95388114  | 37,39249928 | 2,92E-06 | 5,11E-06  |
| phospholipid transfer protein                               | 0,632139665 | 5,880096032 | 35,97225884 | 3,65E-06 | 5,68E-06  |
| EH-domain containing 4                                      | 0,664848474 | 9,939184064 | 33,57209825 | 5,41E-06 | 7,57E-06  |
| unc-119 homolog B (C. elegans)                              | 0,675506454 | 7,035654829 | 31,07623522 | 8,35E-06 | 1,06E-05  |
| inhibitor of DNA binding 3                                  | 0,600629523 | 5,262942343 | 28,1529298  | 1,44E-05 | 1,68E-05  |
| unc-119 homolog B (C. elegans)                              | 0,691828957 | 7,422373965 | 25,29229301 | 2,58E-05 | 2,78E-05  |
| diacylglycerol kinase, alpha                                | 0,72789851  | 9,354917087 | 24,09999616 | 3,34E-05 | 3,34E-05  |

**Panel 8: Genes significantly up-regulated in *Porphyromonas gingivalis* treated DCs (FDR < 0.05) and down-regulated in response to *Aggregatibacter actinomycetemcomitans* challenge.**

| Name                                                                                | FC Pg       | AveExpr     | F           | P.Value  | adj.P.Val |
|-------------------------------------------------------------------------------------|-------------|-------------|-------------|----------|-----------|
| pro-platelet basic protein                                                          | 8,98669363  | 6,860449198 | 732,3841434 | 1,34E-14 | 6,30E-13  |
| pro-platelet basic protein                                                          | 11,40469849 | 6,51917646  | 539,3369829 | 1,06E-13 | 2,48E-12  |
| carbonyl reductase 3                                                                | 1,392230355 | 8,213968244 | 254,4259663 | 1,61E-11 | 2,52E-10  |
| DNA (cytosine-5-)-methyltransferase 3-like                                          | 5,245216189 | 7,010180993 | 218,6236582 | 4,39E-11 | 4,86E-10  |
| glutathione S-transferase, alpha 3                                                  | 3,653904219 | 8,703297172 | 213,33717   | 5,17E-11 | 4,86E-10  |
| glutamate-cysteine ligase, modifier subunit                                         | 1,676705649 | 9,058563264 | 150,0433981 | 5,21E-10 | 4,08E-09  |
| G protein-coupled receptor 155                                                      | 1,755526277 | 5,942490385 | 142,4028115 | 7,32E-10 | 4,91E-09  |
| nicotinamide N-methyltransferase                                                    | 1,651875411 | 5,690170036 | 138,3465011 | 8,83E-10 | 5,02E-09  |
| NAD(P)H dehydrogenase, quinone 1                                                    | 2,896923987 | 7,711821867 | 136,5440558 | 9,61E-10 | 5,02E-09  |
| transferrin receptor                                                                | 1,4273356   | 7,561098902 | 122,8840473 | 1,90E-09 | 8,94E-09  |
| Ras association (RalGDS/AF-6) domain family member 4                                | 1,686243636 | 10,35144737 | 106,9252397 | 4,66E-09 | 1,83E-08  |
| solute carrier family 6 (neurotransmitter transporter, GABA), member 13             | 2,951710562 | 7,661667504 | 106,9084509 | 4,66E-09 | 1,83E-08  |
| acyl-CoA synthetase short-chain family member 2                                     | 1,808533359 | 9,186330485 | 103,2023232 | 5,84E-09 | 2,11E-08  |
| carbonyl reductase 3                                                                | 1,791063584 | 6,592498162 | 96,95121066 | 8,70E-09 | 2,92E-08  |
| Ras association (RalGDS/AF-6) domain family member 4                                | 1,581199174 | 10,19684085 | 91,2836617  | 1,28E-08 | 4,00E-08  |
| aldo-keto reductase family 1, member B8                                             | 2,939497082 | 7,297361153 | 88,80671093 | 1,52E-08 | 4,46E-08  |
| deleted in lymphocytic leukemia, 2                                                  | 1,839946799 | 6,355884084 | 79,28613529 | 3,11E-08 | 8,59E-08  |
| ubiquitin carboxy-terminal hydrolase L1                                             | 2,326893285 | 6,381454567 | 75,2175014  | 4,32E-08 | 1,09E-07  |
| family with sequence similarity 55, member D                                        | 1,764304323 | 5,35300935  | 74,9705382  | 4,41E-08 | 1,09E-07  |
| RIKEN cDNA D330045A20 gene                                                          | 2,467953511 | 5,996618822 | 70,41226383 | 6,52E-08 | 1,50E-07  |
| microsomal glutathione S-transferase 1                                              | 1,535613668 | 7,457779962 | 70,11047026 | 6,69E-08 | 1,50E-07  |
| Ras association (RalGDS/AF-6) domain family member 4                                | 2,338727834 | 7,920368881 | 68,15617256 | 7,98E-08 | 1,70E-07  |
| muscle and microspikes RAS                                                          | 1,463630875 | 9,137361548 | 67,65820531 | 8,35E-08 | 1,71E-07  |
| heat-responsive protein 12                                                          | 2,019280738 | 6,928296101 | 67,17376022 | 8,73E-08 | 1,71E-07  |
| nicotinamide N-methyltransferase                                                    | 1,543253314 | 5,620484325 | 65,46674819 | 1,02E-07 | 1,92E-07  |
| sulfiredoxin 1 homolog (S. cerevisiae)                                              | 1,81654058  | 8,589943709 | 64,16055885 | 1,16E-07 | 2,09E-07  |
| biliverdin reductase B (flavin reductase (NADPH))                                   | 1,553770811 | 12,16971325 | 61,24149191 | 1,54E-07 | 2,69E-07  |
| plakophilin 2                                                                       | 1,882973924 | 6,568493024 | 60,8664168  | 1,60E-07 | 2,69E-07  |
| C-type lectin domain family 4, member n                                             | 1,396430397 | 11,19682899 | 60,16840406 | 1,72E-07 | 2,79E-07  |
| peroxiredoxin 1                                                                     | 2,557104969 | 6,469014704 | 59,31988518 | 1,88E-07 | 2,94E-07  |
| sulfiredoxin 1 homolog (S. cerevisiae)                                              | 1,736386648 | 6,564369712 | 56,25474801 | 2,59E-07 | 3,93E-07  |
| plakophilin 2                                                                       | 1,572965747 | 6,254538441 | 54,37181158 | 3,19E-07 | 4,57E-07  |
| solute carrier family 11 (proton-coupled divalent metal ion transporters), member 1 | 1,885165107 | 10,53394349 | 54,3123351  | 3,21E-07 | 4,57E-07  |
| biliverdin reductase B (flavin reductase (NADPH))                                   | 1,758366587 | 9,050033801 | 52,83912399 | 3,79E-07 | 5,24E-07  |
| sulfiredoxin 1 homolog (S. cerevisiae)                                              | 1,423814773 | 9,237710459 | 51,7418339  | 4,30E-07 | 5,77E-07  |
| catalase                                                                            | 1,437072535 | 8,273289736 | 50,17577099 | 5,17E-07 | 6,75E-07  |
| solute carrier family 11 (proton-coupled divalent metal ion transporters), member 1 | 1,925026398 | 8,707539438 | 47,30930838 | 7,35E-07 | 9,34E-07  |
| pannexin 1                                                                          | 1,502166483 | 7,890064181 | 46,06642119 | 8,61E-07 | 1,07E-06  |
| SLAM family member 9                                                                | 1,423285478 | 6,634081954 | 45,3109117  | 9,50E-07 | 1,14E-06  |
| C-type lectin domain family 4, member b1                                            | 1,823834893 | 8,577381069 | 36,27234955 | 3,48E-06 | 4,09E-06  |
| peroxiredoxin 1                                                                     | 1,351579862 | 11,81387217 | 33,87958526 | 5,14E-06 | 5,89E-06  |
| endothelial cell-specific adhesion molecule                                         | 1,860157866 | 5,45878196  | 33,09448281 | 5,86E-06 | 6,56E-06  |
| growth arrest specific 7                                                            | 1,40992749  | 8,18944093  | 29,74759603 | 1,07E-05 | 1,14E-05  |
| hypothetical LOC100503924                                                           | 1,468028957 | 7,043077154 | 29,72107119 | 1,07E-05 | 1,14E-05  |
| superoxide dismutase 3, extracellular                                               | 1,459251611 | 6,32932001  | 28,91888794 | 1,25E-05 | 1,30E-05  |
| protein tyrosine phosphatase, receptor type, E                                      | 1,368570979 | 8,965046502 | 27,5517246  | 1,63E-05 | 1,66E-05  |

cytochrome b-5

1,338417986 11,82435883 24,85330374 2,84E-05 2,84E-05

Panel 9: Signaling impact pathway analysis (SPIA) algorithm output for all genes differentially (FDR < 0.05) regulated by *Porphyromonas gingivalis* challenge in DCs.

| Name                                                         | ID   | pSize | NDE | pNDE        | TA           | pPERT    | pG          | pGDr         | pGFWER      | Status    |
|--------------------------------------------------------------|------|-------|-----|-------------|--------------|----------|-------------|--------------|-------------|-----------|
| 1 Cytokine-cytokine receptor interaction                     | 4060 | 165   | 48  | 1,70E-17    | 45,16027179  | 5,00E-06 | 4,40E-21    | 5,24E-19     | 5,24E-19    | Activated |
| 2 Lysosome                                                   | 4142 | 113   | 35  | 4,85E-14    | 0 NA         | 0        | 4,85E-14    | 2,89E-12     | 5,77E-12    | Inhibited |
| 3 Osteoclast differentiation                                 | 4380 | 104   | 28  | 6,26E-10    | 34,6026405   | 5,00E-06 | 1,08E-13    | 4,27E-12     | 1,28E-11    | Activated |
| 4 MAPK signaling pathway                                     | 4010 | 209   | 39  | 3,15E-08    | 30,64315146  | 5,00E-06 | 4,80E-12    | 1,43E-10     | 5,71E-10    | Activated |
| 5 Tuberculosis                                               | 5152 | 145   | 36  | 3,00E-11    | 35,22413473  | 0,007    | 6,33E-12    | 1,51E-10     | 7,54E-10    | Activated |
| 6 Staphylococcus aureus infection                            | 5150 | 38    | 13  | 1,26E-06    | -23,34898946 | 5,00E-06 | 1,69E-10    | 3,36E-09     | 2,01E-08    | Inhibited |
| 7 Chemokine signaling pathway                                | 4062 | 139   | 27  | 1,79E-06    | 39,87846152  | 5,00E-06 | 2,37E-10    | 4,03E-09     | 2,82E-08    | Activated |
| 8 Toll-like receptor signaling pathway                       | 4620 | 88    | 27  | 4,78E-11    | 4,653317518  | 0,612    | 7,39E-10    | 1,10E-08     | 8,80E-08    | Activated |
| 9 Systemic lupus erythematosus                               | 5322 | 87    | 19  | 1,03E-05    | -12,99545875 | 5,00E-06 | 1,28E-09    | 1,69E-08     | 1,52E-07    | Inhibited |
| 10 Rheumatoid arthritis                                      | 5323 | 71    | 23  | 3,83E-10    | 1,371990015  | 0,538    | 4,80E-09    | 5,72E-08     | 5,72E-07    | Activated |
| 11 Amoebiasis                                                | 5146 | 85    | 22  | 9,13E-08    | 11,98910485  | 0,003    | 6,30E-09    | 6,82E-08     | 7,50E-07    | Activated |
| 12 Pertussis                                                 | 5133 | 64    | 20  | 1,07E-08    | -11,628342   | 0,049    | 1,18E-08    | 1,17E-07     | 1,40E-06    | Inhibited |
| 13 HTLV-I infection                                          | 5166 | 217   | 38  | 2,62E-07    | 22,59945961  | 0,007    | 3,87E-08    | 3,54E-07     | 4,61E-06    | Activated |
| 14 Focal adhesion                                            | 4510 | 163   | 34  | 1,36E-08    | 3,604137297  | 0,762    | 2,01E-07    | 1,71E-06     | 2,39E-05    | Activated |
| 15 Chagas disease (American trypanosomiasis)                 | 5142 | 83    | 22  | 5,74E-08    | 9,382133605  | 0,227    | 2,50E-07    | 1,98E-06     | 2,97E-05    | Activated |
| 16 Leishmaniasis                                             | 5140 | 57    | 18  | 4,83E-08    | -4,594003187 | 0,327    | 3,00E-07    | 2,23E-06     | 3,57E-05    | Inhibited |
| 17 NOD-like receptor signaling pathway                       | 4621 | 50    | 17  | 3,29E-08    | -0,717300671 | 0,867    | 5,24E-07    | 3,67E-06     | 6,24E-05    | Inhibited |
| 18 Graft-versus-host disease                                 | 5332 | 35    | 13  | 4,22E-07    | 3,196234713  | 0,334    | 2,37E-06    | 1,56E-05     | 0,000281612 | Activated |
| 19 Allograft rejection                                       | 5330 | 33    | 12  | 1,54E-06    | 3,268631319  | 0,296    | 7,10E-06    | 4,45E-05     | 0,00084537  | Activated |
| 20 African trypanosomiasis                                   | 5143 | 20    | 8   | 3,99E-05    | 2,980804733  | 0,047    | 2,66E-05    | 0,000155965  | 0,003166232 | Activated |
| 21 Complement and coagulation cascades                       | 4610 | 47    | 12  | 8,84E-05    | -22,90895164 | 0,022    | 2,75E-05    | 0,000155965  | 0,003275264 | Inhibited |
| 22 Type I diabetes mellitus                                  | 4940 | 38    | 12  | 8,38E-06    | 3,260822248  | 0,296    | 3,45E-05    | 0,000186622  | 0,004105688 | Activated |
| 23 Legionellosis                                             | 5134 | 50    | 14  | 7,31E-06    | 3,558447005  | 0,398    | 4,00E-05    | 0,000206883  | 0,004758298 | Activated |
| 24 Jak-STAT signaling pathway                                | 4630 | 105   | 20  | 5,06E-05    | -4,492312042 | 0,066    | 4,55E-05    | 0,000225422  | 0,00541012  | Inhibited |
| 25 ECM-receptor interaction                                  | 4512 | 63    | 15  | 2,95E-05    | -4,329246146 | 0,148    | 5,83E-05    | 0,000274651  | 0,006941265 | Inhibited |
| 26 Malaria                                                   | 5144 | 38    | 12  | 8,38E-06    | 0,439149293  | 0,678    | 7,43E-05    | 0,000340146  | 0,008843793 | Activated |
| 27 Toxoplasmosis                                             | 5145 | 100   | 20  | 2,43E-05    | -5,889001295 | 0,248    | 7,84E-05    | 0,00034533   | 0,009323906 | Inhibited |
| 28 Viral myocarditis                                         | 5416 | 61    | 15  | 1,96E-05    | 3,972196961  | 0,337    | 8,52E-05    | 0,00035556   | 0,010137884 | Activated |
| 29 Measles                                                   | 5162 | 103   | 21  | 1,12E-05    | -2,984233026 | 0,597    | 8,66E-05    | 0,00035556   | 0,010311228 | Inhibited |
| 30 Herpes simplex infection                                  | 5168 | 161   | 27  | 3,02E-05    | 6,257966986  | 0,307    | 0,00011682  | 0,000449085  | 0,013901256 | Activated |
| 31 Prion diseases                                            | 5020 | 30    | 10  | 2,80E-05    | 3,84882956   | 0,332    | 0,000116989 | 0,000449085  | 0,013921638 | Activated |
| 32 Intestinal immune network for IgA production              | 4672 | 30    | 10  | 2,80E-05    | 1,929758322  | 0,404    | 0,000140139 | 0,000514269  | 0,016676595 | Activated |
| 33 Natural killer cell mediated cytotoxicity                 | 4650 | 95    | 19  | 3,84E-05    | 18,26535518  | 0,3      | 0,000142612 | 0,000514269  | 0,01697087  | Activated |
| 34 Apoptosis                                                 | 4210 | 70    | 11  | 0,010803488 | 26,01767874  | 0,003    | 0,000367438 | 0,001286034  | 0,043725167 | Activated |
| 35 Endocrine and other factor-regulated calcium reabsorption | 4961 | 37    | 8   | 0,004094094 | -11,03224621 | 0,009    | 0,000413007 | 0,001404223  | 0,049147801 | Inhibited |
| 36 Salmonella infection                                      | 5132 | 71    | 15  | 0,000128537 | 3,335987637  | 0,402    | 0,000561702 | 0,001856738  | 0,06684258  | Activated |
| 37 Autoimmune thyroid disease                                | 5320 | 39    | 10  | 0,000326942 | 3,27239882   | 0,241    | 0,000823283 | 0,002647857  | 0,097970696 | Activated |
| 38 T cell receptor signaling pathway                         | 4660 | 88    | 17  | 0,000850538 | 3,919362045  | 0,561    | 0,000880228 | 0,002756505  | 0,104747173 | Activated |
| 39 PPAR signaling pathway                                    | 3320 | 51    | 9   | 0,009688794 | -2,456140273 | 0,018    | 0,001683671 | 0,005137354  | 0,20035679  | Inhibited |
| 40 Mineral absorption                                        | 4978 | 29    | 8   | 0,000759879 | 0,460023749  | 0,239    | 0,001745944 | 0,005194183  | 0,207767329 | Activated |
| 41 Bladder cancer                                            | 5219 | 38    | 10  | 0,00025966  | 0,596412242  | 0,902    | 0,002192065 | 0,006362336  | 0,260855761 | Activated |
| 42 Pancreatic cancer                                         | 5212 | 63    | 13  | 0,000453115 | 1,708156887  | 0,735    | 0,002999772 | 0,008499353  | 0,356972818 | Activated |
| 43 Antigen processing and presentation                       | 4612 | 59    | 12  | 0,00080538  | 2,063931586  | 0,447    | 0,003374129 | 0,0099337707 | 0,401521381 | Activated |
| 44 Colorectal cancer                                         | 5210 | 52    | 11  | 0,000982045 | -1,785087369 | 0,399    | 0,003465658 | 0,00937303   | 0,412413302 | Inhibited |
| 45 Calcium signaling pathway                                 | 4020 | 118   | 18  | 0,001866922 | 6,180068435  | 0,223    | 0,003657007 | 0,009670751  | 0,435183804 | Activated |
| 46 TGF-beta signaling pathway                                | 4350 | 65    | 13  | 0,000621693 | -1,35450814  | 0,787    | 0,004218794 | 0,010913837  | 0,502036491 | Inhibited |
| 47 Amyotrophic lateral sclerosis (ALS)                       | 5014 | 43    | 6   | 0,085064451 | 17,10583719  | 0,006    | 0,004379292 | 0,011087996  | 0,521135799 | Activated |
| 48 Aldosterone-regulated sodium reabsorption                 | 4960 | 30    | 6   | 0,018110415 | -5,891113192 | 0,031    | 0,004763693 | 0,011809989  | 0,566879493 | Inhibited |
| 49 Vascular smooth muscle contraction                        | 4270 | 81    | 14  | 0,001755405 | -2,545343857 | 0,672    | 0,009133365 | 0,021740655  | 1           | Inhibited |
| 50 B cell receptor signaling pathway                         | 4662 | 63    | 12  | 0,001554459 | 1,745768904  | 0,759    | 0,009134729 | 0,021740655  | 1           | Activated |
| 51 Cell cycle                                                | 4110 | 106   | 16  | 0,003620206 | -5,355221046 | 0,345    | 0,009598887 | 0,022397404  | 1           | Inhibited |
| 52 Influenza A                                               | 5164 | 133   | 19  | 0,00305866  | -3,001112972 | 0,488    | 0,011196596 | 0,025622979  | 1           | Inhibited |
| 53 Cholinergic synapse                                       | 4725 | 80    | 13  | 0,004391963 | 5,142565752  | 0,412    | 0,013235888 | 0,029320499  | 1           | Activated |
| 54 p53 signaling pathway                                     | 4115 | 57    | 11  | 0,002157471 | 0,44093001   | 0,85     | 0,013389559 | 0,029320499  | 1           | Activated |
| 55 Arrhythmogenic right ventricular cardiomyopathy (ARVC)    | 5412 | 56    | 11  | 0,001859577 | 0            | 1        | 0,013551491 | 0,029320499  | 1           | Inhibited |
| 56 Adipocytokine signaling pathway                           | 4920 | 55    | 9   | 0,015680255 | 5,230813655  | 0,124    | 0,014082602 | 0,029925528  | 1           | Activated |
| 57 Insulin signaling pathway                                 | 4910 | 111   | 14  | 0,027656353 | -21,15595059 | 0,073    | 0,014546669 | 0,03069361   | 1           | Inhibited |
| 58 Salivary secretion                                        | 4970 | 51    | 10  | 0,002993553 | 0,687410978  | 0,695    | 0,014928014 | 0,030628166  | 1           | Activated |
| 59 Asthma                                                    | 5310 | 16    | 5   | 0,004236339 | -0,893515432 | 0,519    | 0,015654253 | 0,031573833  | 1           | Inhibited |
| 60 mTOR signaling pathway                                    | 4150 | 44    | 8   | 0,012049295 | 0,986620303  | 0,195    | 0,016573004 | 0,032869791  | 1           | Activated |
| 61 Small cell lung cancer                                    | 5222 | 69    | 11  | 0,00971869  | -5,157627896 | 0,264    | 0,017871649 | 0,03495132   | 1           | Inhibited |
| 62 GnRH signaling pathway                                    | 4912 | 77    | 9   | 0,099667449 | 25,4773167   | 0,026    | 0,018024355 | 0,03495132   | 1           | Activated |
| 63 Sulfur relay system                                       | 4122 | 10    | 4   | 0,003910065 | -0,585605319 | 0,69     | 0,018657004 | 0,035241007  | 1           | Inhibited |
| 64 Fc epsilon RI signaling pathway                           | 4664 | 61    | 10  | 0,011040075 | 7,405866889  | 0,343    | 0,024902579 | 0,046303234  | 1           | Activated |
| 65 VEGF signaling pathway                                    | 4370 | 60    | 10  | 0,009846456 | 4,234665997  | 0,398    | 0,025637167 | 0,046935737  | 1           | Activated |
| 66 Melanoma                                                  | 5218 | 55    | 9   | 0,015680255 | -9,194837347 | 0,263    | 0,026768092 | 0,04826368   | 1           | Inhibited |
| 67 Leukocyte transendothelial migration                      | 4670 | 85    | 13  | 0,007394591 | 3,986285776  | 0,601    | 0,028514402 | 0,050049777  | 1           | Activated |
| 68 Chronic myeloid leukemia                                  | 5220 | 64    | 11  | 0,005492531 | -1,015021633 | 0,812    | 0,028599873 | 0,050049777  | 1           | Inhibited |
| 69 Glutamatergic synapse                                     | 4724 | 82    | 12  | 0,013804652 | 1,754035145  | 0,472    | 0,039313222 | 0,067801063  | 1           | Activated |
| 70 GABAergic synapse                                         | 4727 | 58    | 10  | 0,007756374 | 0,174002321  | 0,88     | 0,040865424 | 0,068846458  | 1           | Activated |
| 71 Glioma                                                    | 5214 | 55    | 9   | 0,015680255 | -4,836985658 | 0,438    | 0,041076458 | 0,068846458  | 1           | Inhibited |
| 72 Melanogenesis                                             | 4916 | 67    | 8   | 0,106020909 | 17,81650211  | 0,073    | 0,045364574 | 0,07497756   | 1           | Activated |
| 73 Progesterone-mediated oocyte maturation                   | 4914 | 66    | 8   | 0,09249956  | 6,205777728  | 0,08     | 0,046336568 | 0,075534954  | 1           | Activated |
| 74 Regulation of actin cytoskeleton                          | 4810 | 169   | 21  | 0,009779377 | -1,275055626 | 0,873    | 0,049203567 | 0,079124655  | 1           | Inhibited |
| 75 Type II diabetes mellitus                                 | 4930 | 42    | 5   | 0,180741885 | -6,43895741  | 0,068    | 0,066355305 | 0,10528375   | 1           | Inhibited |
| 76 Dopaminergic synapse                                      | 4728 | 102   | 14  | 0,014154484 | 0,080682318  | 0,977    | 0,07303048  | 0,114350357  | 1           | Activated |
| 77 Dilated cardiomyopathy                                    | 5414 | 64    | 10  | 0,015281764 | 0            | 1        | 0,079176274 | 0,122363332  | 1           | Inhibited |
| 78 Cytosolic DNA-sensing pathway                             | 4623 | 50    | 8   | 0,025013878 | 0,542214267  | 0,65     | 0,083231674 | 0,126981657  | 1           | Activated |
| 79 Long-term potentiation                                    | 4720 | 52    | 8   | 0,03093327  | -4,025892389 | 0,58     | 0,090076975 | 0,135685569  | 1           | Inhibited |
| 80 Alzheimer's disease                                       | 5010 | 138   | 17  | 0,02027282  | -0,177251817 | 0,905    | 0,091703222 | 0,136408542  | 1           | Inhibited |
| 81 Thyroid cancer                                            | 5216 | 23    | 5   | 0,021475599 | -0,273897463 | 0,9      | 0,095600315 | 0,140449846  | 1           | Inhibited |
| 82 Fc gamma R-mediated phagocytosis                          | 4666 | 76    | 10  | 0,044678044 | 3,633373293  | 0,452    | 0,099000311 | 0,143671183  | 1           | Activated |
| 83 Endometrial cancer                                        | 5213 | 42    | 7   | 0,028589225 | 1,671682564  | 0,747    | 0,10350078  | 0,148392684  | 1           | Activated |
| 84 Basal cell carcinoma                                      | 5217 | 29    | 3   | 0,346229409 | 6,984778543  | 0,066    | 0,109199987 | 0,153552409  | 1           | Activated |
| 85 Fanconi anemia pathway                                    | 3460 | 40    | 2   | 0,792356596 | -2,051380187 | 0,029    | 0,109680292 | 0,153552409  | 1           | Inhibited |
| 86 Bacterial invasion of epithelial cells                    | 5100 | 60    | 9   | 0,026525407 | 0,450400266  | 0,948    | 0,117760454 | 0,162947605  | 1           | Activated |
| 87 Bile secretion                                            | 4976 | 42    | 7   | 0,028589225 | 0            | 1        | 0,130216067 | 0,178111632  | 1           | Inhibited |
| 88 Carbohydrate digestion and absorption                     | 4973 | 25    | 5   | 0,030124517 | 0            | 1        | 0,135633103 | 0,183164735  | 1           | Inhibited |
| 89 Non-small cell lung cancer                                | 5223 | 46    | 7   | 0,044349254 | 2,36118284   | 0,688    | 0,136988752 | 0,183164735  | 1           | Activated |
| 90 Oocyte meiosis                                            | 4114 | 87    | 11  | 0,046624335 | 2,127261625  | 0,678    | 0,140804333 | 0,186174618  | 1           | Activated |
| 91 Wnt signaling pathway                                     | 4310 | 111   | 13  | 0,054801026 | 1,64118742   | 0,675    | 0,158952295 | 0,20717704   | 1           | Activated |
| 92 Dorso-ventral axis formation                              | 4320 | 18    | 3   | 0,134733099 | 0,592964939  | 0,278    | 0,16048289  | 0,20717704   | 1           | Activated |
| 93 Hepatitis C                                               | 5160 | 106   | 11  | 0,138796715 | 3,817407966  | 0,273    | 0,161911469 | 0,20717704   | 1           | Activated |
| 94 Long-term depression                                      | 4730 | 48    | 6   | 0,127480493 | -4,051821125 | 0,303    | 0,164310342 | 0,207344392  | 1           | Inhibited |
| 95 Notch signaling pathway                                   | 4330 | 39    | 6   | 0,057779369 | -2,001918133 | 0,675    | 0,165527035 | 0,207344392  | 1           | Inhibited |
| 96 Acute myeloid leukemia                                    | 5221 | 49    | 7   | 0,05924699  | 0,96220739   | 0,719    | 0,17703692  | 0,219452015  | 1           | Activated |
| 97 Renal cell carcinoma                                      |      |       |     |             |              |          |             |              |             |           |



|                                                 |      |     |    |             |              |       |             |             |   |           |
|-------------------------------------------------|------|-----|----|-------------|--------------|-------|-------------|-------------|---|-----------|
| 98 Neurotrophin signaling pathway               | 4722 | 111 | 11 | 0,172902436 | 4,714624733  | 0,397 | 0,252524384 | 0,306636752 | 1 | Activated |
| 99 Tight junction                               | 4530 | 98  | 11 | 0,092585325 | 0,71457817   | 0,762 | 0,257608687 | 0,309650846 | 1 | Activated |
| 100 Pancreatic secretion                        | 4972 | 62  | 8  | 0,074695574 | 0            | 1     | 0,268480874 | 0,31841552  | 1 | Inhibited |
| 101 Neuroactive ligand-receptor interaction     | 4080 | 128 | 14 | 0,075445526 | 0            | 1     | 0,270422749 | 0,31841552  | 1 | Inhibited |
| 102 Gastric acid secretion                      | 4971 | 47  | 6  | 0,118292838 | 0,687410978  | 0,646 | 0,272927589 | 0,31841552  | 1 | Activated |
| 103 Gap junction                                | 4540 | 66  | 8  | 0,099249956 | 0,676645711  | 0,837 | 0,289759618 | 0,33477082  | 1 | Activated |
| 104 RIG-I-like receptor signaling pathway       | 4622 | 56  | 7  | 0,104666417 | 0,542214267  | 0,83  | 0,299130803 | 0,342274669 | 1 | Activated |
| 105 Axon guidance                               | 4360 | 97  | 7  | 0,550629871 | -4,07416301  | 0,171 | 0,316632049 | 0,358849655 | 1 | Inhibited |
| 106 Parkinson's disease                         | 5102 | 97  | 9  | 0,260711315 | 1,405483119  | 0,469 | 0,379230866 | 0,425740311 | 1 | Activated |
| 107 Vasopressin-regulated water reabsorption    | 4962 | 36  | 1  | 0,931737498 | 0,989229583  | 0,144 | 0,403670653 | 0,448942128 | 1 | Activated |
| 108 Huntington's disease                        | 5016 | 142 | 14 | 0,141221985 | 0            | 1     | 0,417653042 | 0,460191778 | 1 | Inhibited |
| 109 Regulation of autophagy                     | 4140 | 23  | 1  | 0,819940295 | -1,265574003 | 0,176 | 0,42366309  | 0,462531263 | 1 | Inhibited |
| 110 RNA transport                               | 3013 | 135 | 8  | 0,761487097 | -0,630080852 | 0,193 | 0,428783179 | 0,463865439 | 1 | Inhibited |
| 111 RNA degradation                             | 3018 | 61  | 5  | 0,447631954 | -0,485628781 | 0,397 | 0,484722002 | 0,519656921 | 1 | Inhibited |
| 112 Protein processing in endoplasmic reticulum | 4141 | 141 | 13 | 0,212634448 | 0            | 1     | 0,541831016 | 0,575695455 | 1 | Inhibited |
| 113 ErbB signaling pathway                      | 4012 | 72  | 5  | 0,59640034  | 3,716486596  | 0,451 | 0,622178021 | 0,655214022 | 1 | Activated |
| 114 Phototransduction                           | 4744 | 19  | 1  | 0,757354947 | -0,687410978 | 0,459 | 0,714937313 | 0,746294212 | 1 | Inhibited |
| 115 Circadian rhythm - mammal                   | 4710 | 16  | 1  | 0,69652673  | 0,398478492  | 0,778 | 0,87390658  | 0,904303331 | 1 | Activated |
| 116 SNARE interactions in vesicular transport   | 4130 | 33  | 2  | 0,696287699 | 0            | 1     | 0,948338515 | 0,972864511 | 1 | Inhibited |
| 117 Taste transduction                          | 4742 | 24  | 1  | 0,832881812 | 0            | 1     | 0,98518552  | 0,999915131 | 1 | Inhibited |
| 118 Hedgehog signaling pathway                  | 4340 | 29  | 1  | 0,884910666 | 0            | 1     | 0,993107438 | 0,999915131 | 1 | Inhibited |
| 119 Olfactory transduction                      | 4740 | 334 | 3  | 0,999999995 | 0,092424871  | 0,987 | 0,999915131 | 0,999915131 | 1 | Activated |

Panel 10: Signaling impact pathway analysis (SPIA) algorithm output for all genes differentially (FDR < 0.05) regulated by *Aggregatibacter actinomycetemcomitans* challenge in DCs.

| Name                                                         | ID   | pSize | NDE | pNDE        | tA           | pPERT    | pG          | pGDr        | pGFWer      | Status    |
|--------------------------------------------------------------|------|-------|-----|-------------|--------------|----------|-------------|-------------|-------------|-----------|
| 1 Osteoclast differentiation                                 | 4380 | 104   | 56  | 1,78E-15    | 41,4180719   | 5,00E-06 | 4,19E-19    | 5,03E-17    | 5,03E-17    | Activated |
| 2 Cytokine-cytokine receptor interaction                     | 4060 | 165   | 72  | 2,74E-13    | 78,39556393  | 5,00E-06 | 5,77E-17    | 3,46E-15    | 6,92E-15    | Activated |
| 3 Antigen processing and presentation                        | 4612 | 59    | 36  | 1,23E-12    | 16,52756886  | 5,00E-06 | 2,49E-16    | 9,96E-15    | 2,99E-14    | Activated |
| 4 HTLV-I infection                                           | 5166 | 217   | 92  | 1,27E-15    | 28,02569569  | 0,016    | 7,99E-16    | 2,40E-14    | 9,59E-14    | Activated |
| 5 Leishmaniasis                                              | 5140 | 57    | 38  | 4,27E-15    | -20,83855494 | 0,008    | 1,33E-15    | 3,19E-14    | 1,60E-13    | Inhibited |
| 6 Herpes simplex infection                                   | 5168 | 161   | 77  | 7,96E-17    | 4,434854727  | 0,704    | 2,15E-15    | 4,31E-14    | 2,58E-13    | Activated |
| 7 Measles                                                    | 5162 | 103   | 55  | 5,12E-15    | -18,2669676  | 0,044    | 8,34E-15    | 1,43E-13    | 1,00E-12    | Inhibited |
| 8 Tuberculosis                                               | 5152 | 145   | 66  | 2,41E-13    | 53,80234837  | 0,004    | 3,43E-14    | 4,85E-13    | 4,11E-12    | Activated |
| 9 Graft-versus-host disease                                  | 5332 | 35    | 24  | 2,05E-10    | 19,65471435  | 5,00E-06 | 3,64E-14    | 4,85E-13    | 4,37E-12    | Activated |
| 10 Allograft rejection                                       | 5330 | 33    | 23  | 2,95E-10    | 19,66711544  | 5,00E-06 | 5,19E-14    | 6,22E-13    | 6,22E-12    | Activated |
| 11 Lysosome                                                  | 4142 | 113   | 56  | 1,90E-13    | 0            | NA       | 1,90E-13    | 1,98E-12    | 2,28E-11    | Inhibited |
| 12 Jak-STAT signaling pathway                                | 4630 | 105   | 54  | 7,15E-14    | -7,369840062 | 0,082    | 1,98E-13    | 1,98E-12    | 2,38E-11    | Inhibited |
| 13 Type I diabetes mellitus                                  | 4940 | 38    | 24  | 2,62E-09    | 19,88993921  | 5,00E-06 | 4,31E-13    | 3,98E-12    | 5,17E-11    | Activated |
| 14 Rheumatoid arthritis                                      | 5323 | 71    | 39  | 1,45E-11    | 12,18375883  | 0,002    | 9,30E-13    | 7,97E-12    | 1,12E-10    | Activated |
| 15 Staphylococcus aureus infection                           | 5150 | 38    | 26  | 3,85E-11    | -28,24737614 | 0,001    | 1,23E-12    | 9,82E-12    | 1,47E-10    | Inhibited |
| 16 Chemokine signaling pathway                               | 4062 | 139   | 61  | 1,32E-11    | 38,95704425  | 0,034    | 1,32E-11    | 9,87E-11    | 1,58E-09    | Activated |
| 17 Autoimmune thyroid disease                                | 5320 | 39    | 22  | 2,16E-07    | 19,54148795  | 5,00E-06 | 3,09E-11    | 2,18E-10    | 3,71E-09    | Activated |
| 18 Small cell lung cancer                                    | 5222 | 69    | 38  | 2,37E-11    | 20,09769438  | 0,051    | 3,44E-11    | 2,22E-10    | 4,13E-09    | Activated |
| 19 Influenza A                                               | 5164 | 133   | 61  | 1,27E-12    | -0,287246422 | 0,974    | 3,52E-11    | 2,22E-10    | 4,23E-09    | Inhibited |
| 20 Toll-like receptor signaling pathway                      | 4620 | 88    | 46  | 2,34E-12    | 7,334414515  | 0,572    | 3,80E-11    | 2,28E-10    | 4,56E-09    | Activated |
| 21 Toxoplasmosis                                             | 5145 | 100   | 48  | 4,21E-11    | -8,430083919 | 0,32     | 3,51E-10    | 2,00E-09    | 4,21E-08    | Inhibited |
| 22 MAPK signaling pathway                                    | 4010 | 209   | 66  | 8,07E-06    | 38,76158962  | 5,00E-06 | 1,01E-09    | 5,45E-09    | 1,21E-07    | Activated |
| 23 Viral myocarditis                                         | 5416 | 61    | 31  | 2,10E-08    | 23,09832859  | 0,002    | 1,04E-09    | 5,45E-09    | 1,25E-07    | Activated |
| 24 Chagas disease (American trypanosomiasis)                 | 5142 | 83    | 42  | 8,18E-11    | 0,553470333  | 0,956    | 1,90E-09    | 9,49E-09    | 2,28E-07    | Activated |
| 25 Systemic lupus erythematosus                              | 5322 | 87    | 41  | 2,17E-09    | -6,496590093 | 0,069    | 3,54E-09    | 1,70E-08    | 4,25E-07    | Inhibited |
| 26 B cell receptor signaling pathway                         | 4662 | 63    | 34  | 5,49E-10    | -0,866866355 | 0,936    | 1,15E-08    | 5,31E-08    | 1,38E-06    | Inhibited |
| 27 Intestinal immune network for IgA production              | 4672 | 30    | 18  | 7,96E-07    | 11,8241682   | 0,001    | 1,75E-08    | 7,77E-08    | 2,10E-06    | Activated |
| 28 Apoptosis                                                 | 4210 | 70    | 32  | 2,96E-07    | 33,69300511  | 0,004    | 2,55E-08    | 1,09E-07    | 3,07E-06    | Activated |
| 29 Pertussis                                                 | 5133 | 64    | 31  | 8,80E-08    | -17,58928794 | 0,02     | 3,72E-08    | 1,54E-07    | 4,47E-06    | Inhibited |
| 30 Amoebiasis                                                | 5146 | 85    | 38  | 4,95E-08    | 9,822727266  | 0,041    | 4,27E-08    | 1,71E-07    | 5,12E-06    | Activated |
| 31 Acute myeloid leukemia                                    | 5221 | 49    | 27  | 1,80E-08    | 7,188679208  | 0,219    | 8,03E-08    | 3,11E-07    | 9,64E-06    | Activated |
| 32 Malaria                                                   | 5144 | 38    | 23  | 1,83E-08    | -0,266350704 | 0,874    | 3,03E-07    | 1,14E-06    | 3,63E-05    | Inhibited |
| 33 Hepatitis C                                               | 5160 | 106   | 43  | 2,06E-07    | 11,8206163   | 0,111    | 4,26E-07    | 1,55E-06    | 5,11E-05    | Activated |
| 34 Pancreatic cancer                                         | 5212 | 63    | 31  | 5,54E-08    | 6,260887175  | 0,446    | 4,57E-07    | 1,61E-06    | 5,49E-05    | Activated |
| 35 T cell receptor signaling pathway                         | 4660 | 88    | 39  | 4,44E-08    | 5,799385439  | 0,578    | 4,75E-07    | 1,63E-06    | 5,70E-05    | Activated |
| 36 Regulation of actin cytoskeleton                          | 4810 | 169   | 62  | 4,53E-08    | -1,710498432 | 0,899    | 7,33E-07    | 2,44E-06    | 8,80E-05    | Inhibited |
| 37 Legionellosis                                             | 5134 | 50    | 25  | 7,21E-07    | 4,720708762  | 0,368    | 4,28E-06    | 1,39E-05    | 0,000514143 | Activated |
| 38 Focal adhesion                                            | 4510 | 163   | 58  | 4,02E-07    | -1,841374494 | 0,902    | 5,74E-06    | 1,81E-05    | 0,00688796  | Inhibited |
| 39 Salmonella infection                                      | 5132 | 71    | 31  | 1,55E-06    | 7,163214084  | 0,242    | 5,93E-06    | 1,82E-05    | 0,000711534 | Activated |
| 40 Cell cycle                                                | 4110 | 106   | 40  | 4,71E-06    | -16,83714823 | 0,106    | 7,75E-06    | 2,32E-05    | 0,000929506 | Inhibited |
| 41 mTOR signaling pathway                                    | 4150 | 44    | 23  | 7,25E-07    | 0,349325705  | 0,785    | 8,75E-06    | 2,53E-05    | 0,001050522 | Activated |
| 42 Natural killer cell mediated cytotoxicity                 | 4650 | 95    | 38  | 1,56E-06    | 21,52270497  | 0,37     | 8,86E-06    | 2,53E-05    | 0,001063156 | Activated |
| 43 African trypanosomiasis                                   | 5143 | 20    | 12  | 5,83E-05    | 4,90909777   | 0,012    | 1,06E-05    | 2,96E-05    | 0,001273259 | Activated |
| 44 Leukocyte transendothelial migration                      | 4670 | 85    | 34  | 5,43E-06    | 18,79537095  | 0,162    | 1,31E-05    | 3,58E-05    | 0,001576525 | Activated |
| 45 Chronic myeloid leukemia                                  | 5220 | 64    | 29  | 1,32E-06    | 2,206103026  | 0,783    | 1,53E-05    | 4,08E-05    | 0,001836177 | Activated |
| 46 Fc gamma R-mediated phagocytosis                          | 4666 | 76    | 32  | 2,77E-06    | 5,597072934  | 0,577    | 2,29E-05    | 5,98E-05    | 0,002751423 | Activated |
| 47 NOD-like receptor signaling pathway                       | 4621 | 50    | 24  | 3,05E-06    | -2,501804534 | 0,696    | 2,98E-05    | 7,61E-05    | 0,003578055 | Inhibited |
| 48 Endocrine and other factor-regulated calcium reabsorption | 4961 | 37    | 17  | 0,000165481 | -12,15267884 | 0,032    | 6,96E-05    | 0,000174068 | 0,008355278 | Inhibited |
| 49 Insulin signaling pathway                                 | 4910 | 111   | 38  | 9,84E-05    | -30,91052212 | 0,084    | 0,00010496  | 0,000257046 | 0,012595235 | Inhibited |
| 50 Bacterial invasion of epithelial cells                    | 5100 | 60    | 25  | 4,10E-05    | 15,50959073  | 0,261    | 0,00013323  | 0,000319752 | 0,015987592 | Activated |
| 51 p53 signaling pathway                                     | 4115 | 57    | 25  | 1,42E-05    | -1,152553101 | 0,782    | 0,000137615 | 0,0003238   | 0,0165138   | Inhibited |
| 52 Aldosterone-regulated sodium reabsorption                 | 4960 | 30    | 14  | 0,000509445 | -8,963037976 | 0,025    | 0,000156286 | 0,00036066  | 0,018754318 | Inhibited |
| 53 Carbohydrate digestion and absorption                     | 4973 | 25    | 14  | 4,06E-05    | -1,147155573 | 0,361    | 0,000177861 | 0,000402705 | 0,021343367 | Inhibited |
| 54 Glioma                                                    | 5214 | 55    | 24  | 2,33E-05    | -4,050529582 | 0,722    | 0,000201353 | 0,000447451 | 0,024162379 | Inhibited |
| 55 ECM-receptor interaction                                  | 4512 | 63    | 26  | 3,54E-05    | 2,367619693  | 0,552    | 0,000231202 | 0,000504442 | 0,027744292 | Activated |
| 56 Cytosolic DNA-sensing pathway                             | 4623 | 50    | 22  | 4,32E-05    | 1,719993172  | 0,484    | 0,000246119 | 0,000527397 | 0,029534237 | Activated |
| 57 Asthma                                                    | 5310 | 16    | 9   | 0,000982634 | 5,518985942  | 0,028    | 0,000316431 | 0,00066617  | 0,037971711 | Activated |
| 58 Complement and coagulation cascades                       | 4610 | 47    | 17  | 0,004174757 | -31,39751982 | 0,008    | 0,000377632 | 0,000781308 | 0,045315874 | Inhibited |
| 59 Prion diseases                                            | 5020 | 30    | 15  | 0,000122288 | 5,179651642  | 0,33     | 0,000448659 | 0,000912527 | 0,053839113 | Activated |
| 60 Cholinergic synapse                                       | 4725 | 80    | 28  | 0,000514493 | 15,73594347  | 0,109    | 0,000605029 | 0,001210059 | 0,072603525 | Activated |
| 61 VEGF signaling pathway                                    | 4370 | 60    | 23  | 0,000362263 | 9,602123796  | 0,237    | 0,000889715 | 0,001750258 | 0,106765768 | Activated |
| 62 TGF-beta signaling pathway                                | 4350 | 65    | 22  | 0,003170752 | -18,24497016 | 0,028    | 0,000917049 | 0,001774935 | 0,11004594  | Inhibited |
| 63 Type II diabetes mellitus                                 | 4930 | 42    | 16  | 0,002959578 | -14,60190946 | 0,033    | 0,00099951  | 0,001903829 | 0,119941228 | Inhibited |
| 64 Neurotrophin signaling pathway                            | 4722 | 111   | 36  | 0,000488069 | 9,735740593  | 0,354    | 0,001669627 | 0,00313055  | 0,200355187 | Activated |
| 65 Colorectal cancer                                         | 5210 | 52    | 21  | 0,000279746 | -1,217603765 | 0,711    | 0,001890464 | 0,003496734 | 0,227287694 | Inhibited |
| 66 Bladder cancer                                            | 5219 | 38    | 17  | 0,000246841 | 1,092891504  | 0,869    | 0,002026464 | 0,00368448  | 0,243175709 | Activated |
| 67 Tight junction                                            | 4530 | 98    | 32  | 0,000857381 | -5,797816744 | 0,267    | 0,002147766 | 0,003803754 | 0,257731895 | Inhibited |
| 68 Non-small cell lung cancer                                | 5223 | 46    | 19  | 0,000383705 | -6,019168429 | 0,599    | 0,002155461 | 0,003803754 | 0,258655272 | Inhibited |
| 69 Amyotrophic lateral sclerosis (ALS)                       | 5014 | 43    | 14  | 0,023696486 | 20,85157774  | 0,01     | 0,002215052 | 0,003852265 | 0,265806289 | Activated |
| 70 Endometrial cancer                                        | 5213 | 42    | 18  | 0,000315151 | 2,726732272  | 0,774    | 0,002273066 | 0,003896684 | 0,272767894 | Activated |
| 71 Melanoma                                                  | 5218 | 55    | 21  | 0,000683855 | -8,966020662 | 0,47     | 0,00290646  | 0,004912327 | 0,348775226 | Inhibited |
| 72 ErbB signaling pathway                                    | 4012 | 72    | 25  | 0,001142458 | 13,67957328  | 0,292    | 0,003004239 | 0,005007065 | 0,360508705 | Activated |
| 73 Alzheimer's disease                                       | 5010 | 138   | 41  | 0,001493015 | -5,386801391 | 0,241    | 0,003213132 | 0,005575824 | 0,385575824 | Inhibited |
| 74 Vascular smooth muscle contraction                        | 4270 | 81    | 26  | 0,003270004 | -12,0409787  | 0,17     | 0,0047      |             |             |           |

|                                                           |      |     |    |             |              |       |             |             |             |           |
|-----------------------------------------------------------|------|-----|----|-------------|--------------|-------|-------------|-------------|-------------|-----------|
| 75 Progesterone-mediated oocyte maturation                | 4914 | 66  | 21 | 0,008621212 | 9,74562595   | 0,071 | 0,005140837 | 0,008225339 | 0,616900414 | Activated |
| 76 Mineral absorption                                     | 4978 | 29  | 10 | 0,035449273 | 2,209117452  | 0,021 | 0,006106513 | 0,009641862 | 0,732781528 | Activated |
| 77 RIG-I-like receptor signaling pathway                  | 4622 | 56  | 20 | 0,002348149 | 4,021239035  | 0,38  | 0,007157746 | 0,011154928 | 0,858929476 | Activated |
| 78 PPAR signaling pathway                                 | 3320 | 51  | 14 | 0,089343215 | -3,39854573  | 0,015 | 0,010205195 | 0,0157003   |             | Inhibited |
| 79 Protein processing in endoplasmic reticulum            | 4141 | 141 | 40 | 0,004211429 | 3,863443971  | 0,327 | 0,010449372 | 0,015872464 |             | Activated |
| 80 Fc epsilon RI signaling pathway                        | 4664 | 61  | 20 | 0,007116957 | 14,07364937  | 0,217 | 0,011541355 | 0,017312033 |             | Activated |
| 81 Calcium signaling pathway                              | 4020 | 118 | 33 | 0,010927748 | 9,018745611  | 0,148 | 0,012011725 | 0,017795148 |             | Activated |
| 82 Oocyte meiosis                                         | 4114 | 87  | 27 | 0,004652083 | 5,969669178  | 0,496 | 0,01631729  | 0,02387896  |             | Activated |
| 83 Huntington's disease                                   | 5016 | 142 | 37 | 0,022902125 | 3,046210309  | 0,111 | 0,017730764 | 0,025634839 |             | Activated |
| 84 Glutamatergic synapse                                  | 4724 | 82  | 26 | 0,003939821 | 1,737406748  | 0,661 | 0,018100959 | 0,025858513 |             | Activated |
| 85 Long-term potentiation                                 | 4720 | 52  | 18 | 0,005551471 | -7,34127675  | 0,531 | 0,020123915 | 0,028410233 |             | Inhibited |
| 86 GABAergic synapse                                      | 4727 | 58  | 20 | 0,003753961 | 0,364259275  | 0,871 | 0,021982381 | 0,03067309  |             | Activated |
| 87 Gap junction                                           | 4540 | 66  | 20 | 0,017818193 | 8,203081234  | 0,245 | 0,028087493 | 0,03874137  |             | Activated |
| 88 Renal cell carcinoma                                   | 5211 | 62  | 19 | 0,018273587 | 6,146422219  | 0,259 | 0,030068922 | 0,041003076 |             | Activated |
| 89 RNA transport                                          | 3013 | 135 | 37 | 0,010353837 | 0,689306042  | 0,518 | 0,033403509 | 0,045038439 |             | Activated |
| 90 Arrhythmogenic right ventricular cardiomyopathy (ARVC) | 5412 | 56  | 19 | 0,005700641 | 0            | 1     | 0,03515686  | 0,046875814 |             | Inhibited |
| 91 Thyroid cancer                                         | 5216 | 23  | 10 | 0,006034595 | -0,026362087 | 0,996 | 0,036749462 | 0,048460829 |             | Inhibited |
| 92 Adipocytokine signaling pathway                        | 4920 | 55  | 17 | 0,022767199 | 3,229574355  | 0,401 | 0,052004553 | 0,067832025 |             | Activated |
| 93 Salivary secretion                                     | 4970 | 51  | 15 | 0,047390296 | 3,190191044  | 0,231 | 0,060370024 | 0,077896805 |             | Activated |
| 94 Parkinson's disease                                    | 5012 | 97  | 28 | 0,011697492 | 0,044329105  | 0,992 | 0,063315737 | 0,080828601 |             | Activated |
| 95 Dopaminergic synapse                                   | 4728 | 102 | 28 | 0,022927714 | -2,017802841 | 0,539 | 0,066652441 | 0,084192557 |             | Inhibited |
| 96 Melanogenesis                                          | 4916 | 67  | 18 | 0,071445114 | 16,01242727  | 0,241 | 0,087155178 | 0,108943973 |             | Activated |
| 97 RNA degradation                                        | 3018 | 61  | 18 | 0,030875192 | 0,610217921  | 0,588 | 0,09093338  | 0,112494903 |             | Activated |
| 98 Gastric acid secretion                                 | 4971 | 47  | 15 | 0,0235345   | -0,174848403 | 0,951 | 0,107419745 | 0,130680755 |             | Inhibited |
| 99 Wnt signaling pathway                                  | 4310 | 111 | 30 | 0,023494786 | 0,349882069  | 0,957 | 0,107811623 | 0,130680755 |             | Activated |
| 100 Fanconi anemia pathway                                | 3460 | 40  | 5  | 0,899241178 | -2,994159787 | 0,031 | 0,127673484 | 0,153208181 |             | Inhibited |
| 101 Notch signaling pathway                               | 4330 | 39  | 10 | 0,191412172 | -8,745456595 | 0,171 | 0,144654096 | 0,171866253 |             | Inhibited |
| 102 Regulation of autophagy                               | 4140 | 23  | 2  | 0,949413082 | -3,726505199 | 0,057 | 0,211953691 | 0,249357284 |             | Inhibited |
| 103 Dorsal-ventral axis formation                         | 4320 | 18  | 4  | 0,453780728 | 1,244099638  | 0,127 | 0,222089859 | 0,258745466 |             | Activated |
| 104 Pancreatic secretion                                  | 4972 | 62  | 16 | 0,114533206 | 0,614044544  | 0,56  | 0,240308652 | 0,277279214 |             | Activated |
| 105 GnRH signaling pathway                                | 4912 | 77  | 19 | 0,129343016 | 6,957151808  | 0,519 | 0,248453837 | 0,283947243 |             | Activated |
| 106 Long-term depression                                  | 4730 | 48  | 12 | 0,185796665 | -5,338279239 | 0,38  | 0,257748438 | 0,291790685 |             | Inhibited |
| 107 Basal cell carcinoma                                  | 5217 | 29  | 6  | 0,479807834 | 7,50549318   | 0,153 | 0,265136102 | 0,297348899 |             | Activated |
| 108 Axon guidance                                         | 4360 | 97  | 24 | 0,095202498 | -1,793360538 | 0,791 | 0,270059905 | 0,300066562 |             | Inhibited |
| 109 Dilated cardiomyopathy                                | 5414 | 64  | 17 | 0,085446417 | 0            | 1     | 0,295633136 | 0,325467673 |             | Inhibited |
| 110 Circadian rhythm - mammal                             | 4710 | 16  | 5  | 0,171564468 | -0,839831458 | 0,773 | 0,400546514 | 0,436959833 |             | Inhibited |
| 111 Vasopressin-regulated water reabsorption              | 4962 | 36  | 8  | 0,371932087 | 1,293699137  | 0,485 | 0,489327035 | 0,529002199 |             | Activated |
| 112 Sulfur relay system                                   | 4122 | 10  | 3  | 0,291062303 | -0,359387794 | 0,876 | 0,603415185 | 0,64651627  |             | Inhibited |
| 113 SNARE interactions in vesicular transport             | 4130 | 33  | 8  | 0,279716987 | 0,005858753  | 0,997 | 0,634999661 | 0,674335923 |             | Activated |
| 114 Bile secretion                                        | 4976 | 42  | 9  | 0,401307336 | 0            | 1     | 0,767712059 | 0,808117956 |             | Inhibited |
| 115 Hedgehog signaling pathway                            | 4340 | 29  | 5  | 0,667252554 | -1,398028994 | 0,633 | 0,786400288 | 0,820591605 |             | Inhibited |
| 116 Neuroactive ligand-receptor interaction               | 4080 | 128 | 24 | 0,560268631 | 0            | 1     | 0,88485405  | 0,915366259 |             | Inhibited |
| 117 Olfactory transduction                                | 4740 | 334 | 8  | 1           | -2,478268194 | 0,691 | 0,94640428  | 0,968309915 |             | Inhibited |
| 118 Phototransduction                                     | 4744 | 19  | 3  | 0,727476408 | 0,023502626  | 0,972 | 0,952171417 | 0,968309915 |             | Activated |
| 119 Maturity onset diabetes of the young                  | 4950 | 14  | 1  | 0,947372668 | 0            | 1     | 0,998590229 | 0,999084271 |             | Inhibited |
| 120 Taste transduction                                    | 4742 | 24  | 2  | 0,957510814 | 0            | 1     | 0,999084271 | 0,999084271 |             | Inhibited |
